# Supplementary material for: Detection of malicious nodes based on consortium blockchain
Source: PeerJ Comput Sci. 2024 Jun 12;10:e2108. doi: 10.7717/peerj-cs.2108 (PMC11232615; doi:10.7717/peerj-cs.2108)
Supplement: Supplemental Information 2 — The node's transaction time, transaction address, and block number. [file peerj-cs-10-2108-s002.xlsx]

## Sheet: Sheet1
	hash	from_address	to_address	value	input	block_number	block_hash
0	0xa611438e5637c227e5080477b7180fc3d1c76710f2aa5f6d71c28a1dee1e2ed4	0x506a48155c891c78c04bc0b70eb1d9b2361635e0	0x7cc46cf6392ed9db45351a3f82eb2cc3b83da761	0	0xa0712d680000000000000000000000000000000000000000000000000000000000000001	16113072	0x2dded46570b4cf879e0083e7f37a9169061075965dfdb54914a42b47fe443954
4	0xba053083f0752cd5f9a152105698dba490d5992b9839ba2efc8577604fd78ede	0x7bd8477901552199e8208f62875aa94fab2fffb3	0x68b3465833fb72a70ecdf485e0e4c7bd8665fc45	0	0x5ae401dc00000000000000000000000000000000000000000000000000000000638ce637000000000000000000000000000000000000000000000000000000000000004000000000000000000000000000000000000000000000000000000000000000020000000000000000000000000000000000000000000000000000000000000040000000000000000000000000000000000000000000000000000000000000016000000000000000000000000000000000000000000000000000000000000000e4472b4…	16113072	0x2dded46570b4cf879e0083e7f37a9169061075965dfdb54914a42b47fe443954
5	0xc966f3ef652e857baafd1c0e02e72e743834d22fd89c975631422853bebb6885	0xf8205e37e797aea754107823f0c3808f057f1c71	0xc02aaa39b223fe8d0a0e5c4f27ead9083c756cc2	0	0x095ea7b30000000000000000000000001e0049783f008a0085193e00003d00cd54003c71ffffffffffffffffffffffffffffffffffffffffffffffffffffffffffffffff	16113072	0x2dded46570b4cf879e0083e7f37a9169061075965dfdb54914a42b47fe443954
10	0x590ad8ad13d4fae652af10e56b83022ce76bebe789e3b1ea367e6e93fc6743c0	0x31c01e90edcf8602c1a18b2ae4e5a72d8dce76bd	0x278c8c991873fc3baed5ffedd032fec16dfb10ce	0	0x6a761202000000000000000000000000278c8c991873fc3baed5ffedd032fec16dfb10ce0000000000000000000000000000000000000000000000000000000000000000000000000000000000000000000000000000000000000000000000000000014000000000000000000000000000000000000000000000000000000000000000000000000000000000000000000000000000000000000000000000000000000000000000000000000000000000000000000000000000000000000000000000000000000…	16113072	0x2dded46570b4cf879e0083e7f37a9169061075965dfdb54914a42b47fe443954
11	0x6f19cf1f0e20d91ffdc663bbd6147442cde3c25fe14774d8f7ce8f7903026eb9	0xbf8fbb3f3b0a3379167b51b071fa4a9997d8db87	0xde2cbbec82bf8c25b9a7be3fa42481650775a180	0	0xb071401b00000000000000000000000000000000000000000000000000000000000000b4	16113072	0x2dded46570b4cf879e0083e7f37a9169061075965dfdb54914a42b47fe443954
15	0x3fe20c9fea053b687ddbbb77cbc1860c01e708cb942a5400a14193304ef49c8b	0x15e556150006c3048c604d9a1a6c58673a7d4d2a	0xdac17f958d2ee523a2206206994597c13d831ec7	0	0xa9059cbb00000000000000000000000027ad6e2f21e326fe086b79391b0a7250b138dce00000000000000000000000000000000000000000000000000000000002102484	16113072	0x2dded46570b4cf879e0083e7f37a9169061075965dfdb54914a42b47fe443954
16	0xc2aa0a14da23481353e1a60050440545c9d0b2cd1614c4f1aee3a66aa59564c9	0xaf83d2274120adbfd70b450654953405ab1636d2	0xfc384a64df241c83b0e248d0f4bc3468dde44ce0	4760000000000000	0x	16113072	0x2dded46570b4cf879e0083e7f37a9169061075965dfdb54914a42b47fe443954
19	0xb2133d45a8c22444ce4e463f7083842fe4542ab20fac56cc0ba0c090b23adcd7	0x86ce119ccebcc254d62c335c97afe1ba2a697aef	0x86afef8d914f83722139dc0a9f557186fada02ce	1.85e+20	0x	16113072	0x2dded46570b4cf879e0083e7f37a9169061075965dfdb54914a42b47fe443954
20	0x149f880b5d23f905cc4092821d92e58933da51e12c3e891adee5ebdd2f0d9322	0x1be210e7990eff6c07cb8cadcb9d077063ac3614	0x9535f7d54338ea260cee90b0e17568ca1a96fb86	2100000000000000	0x	16113072	0x2dded46570b4cf879e0083e7f37a9169061075965dfdb54914a42b47fe443954
22	0x35d8155bc7215158b2b72b5ea537df10aa57645c55e4f374f8a26fa9a69b094e	0xf9f65575983c3207363034d62f9b71718704a02a	0xeeeec6476073778077b40a73fe32e23a9876cab4	7.94e+16	0x2b66d72e000000000000000000000000000000000000000000000000000000000000002000000000000000000000000000000000000000000000000000000000000000ea65794a68624763694f694a46557a49314e694973496d74705a434936496a64684e6a526c5a6d51314c544a694e4463744e475a6a5a6931684f4463784c5445785a6d59354f5451345954646a4f434a392e436751784d6a553545674e56553051614a44526d5a57597a596a5a684c5463355a5463744e4746684e4330355a4464684c5…	16113072	0x2dded46570b4cf879e0083e7f37a9169061075965dfdb54914a42b47fe443954
23	0x3cd118152bd754d8ba9bed6d97f8673a696d7689b643126328bca81f19164eac	0x778f2e68b5dbe53dc4021c7f3f63f3459a334fda	0x82c7a8f707110f5fbb16184a5933e9f78a34c6ab	0	0xa22cb46500000000000000000000000000000000000111abe46ff893f3b2fdf1f759a8a80000000000000000000000000000000000000000000000000000000000000001	16113072	0x2dded46570b4cf879e0083e7f37a9169061075965dfdb54914a42b47fe443954
25	0xfb30215f99650398005e68899bac18838ea7865222d25b7950b784412acd5d7f	0x1be210e7990eff6c07cb8cadcb9d077063ac3614	0x05f8688d6ea822137d58de2e4a0a0e7080c42dc0	2100000000000000	0x	16113072	0x2dded46570b4cf879e0083e7f37a9169061075965dfdb54914a42b47fe443954
26	0xa139941ddc65c4bbc31bf42a24cb2490abfe8cd040230f607d62338dd2930960	0x9cd8d7d750c5b566af60f5c684cbb39b7790c2bd	0xda3643af97eb050b79067aff8b3d72254505df86	0	0xa22cb46500000000000000000000000000000000000111abe46ff893f3b2fdf1f759a8a80000000000000000000000000000000000000000000000000000000000000001	16113072	0x2dded46570b4cf879e0083e7f37a9169061075965dfdb54914a42b47fe443954
27	0x75c42e68ff43e1e306ba4c7826b61e5ed0650a44815bb4f3937a85c3d2107e0d	0x3a87c8642672ca0b9d4f1a921b96b001e23c1b43	0x292f04a44506c2fd49bac032e1ca148c35a478c8	3.15e+16	0x	16113072	0x2dded46570b4cf879e0083e7f37a9169061075965dfdb54914a42b47fe443954
29	0x002f5e180452908a40360f769fcab0aca4da8ad442d43d0a6c6b3b5d5ee1ad20	0x46340b20830761efd32832a74d7169b29feb9758	0xec52a6f480f3fba9aaa7aae781908559d4ebf445	7.78e+16	0x	16113072	0x2dded46570b4cf879e0083e7f37a9169061075965dfdb54914a42b47fe443954
30	0xe5ae65ba33bf0d9b39944cd5f2d499e690c0de633be4cab40c54e7e940b7796f	0x5f6b3938cc56f06de1148bc63439f4749e2e378d	0x5eb294507e5f038b8b34433ed37b4c18dd3a3074	1.6e+16	0x	16113072	0x2dded46570b4cf879e0083e7f37a9169061075965dfdb54914a42b47fe443954
31	0x0adee6062bf242ef07e257c6942e47cbf7788f0a7340ed0cf1f9478331a98c42	0x2a9262cd2e9d20cc4386ffd9e4d6ca5c492833f1	0x76f4eed9fe41262669d0250b2a97db79712ad855	0	0xf17a454600000000000000000000000000000000000000000000000000000000000000c000000000000000000000000000000000000000000000000000000000000001a0000000000000000000000000000000000000000000000000000000026dfdf93d0000000000000000000000000000000000000000000000000000000267c5ac820000000000000000000000001d64fb0ffa8362b2e1ee7ee03929159551eab26e000000000000000000000000000000000000000000000000000000000000022000000…	16113072	0x2dded46570b4cf879e0083e7f37a9169061075965dfdb54914a42b47fe443954
33	0xa09bc4a811c346df75c68b9398d8bf8ffde9d0f280e0354d415e635916c84cd2	0x5acaf7c064f609c1ac40648f200d1160cb3b054f	0x3db76cc3673fef9b454562df53188ac3147826f8	0	0x39125215000000000000000000000000e359adc19855a1642ebb8d990bbbecdc1380c5aa00000000000000000000000000000000000000000000000007ece08ae9b0d80000000000000000000000000000000000000000000000000000000000000000c000000000000000000000000000000000000000000000000000000000639619b200000000000000000000000000000000000000000000000000000000000017d300000000000000000000000000000000000000000000000000000000000000e000000…	16113072	0x2dded46570b4cf879e0083e7f37a9169061075965dfdb54914a42b47fe443954
34	0x6ce2de7709324b847a6539242e7657af91341e57de3bb5f935c5354b712576c2	0x934ed35e39f5d9b1d42041b3f6b74c0ce452f4ac	0x9507c04b10486547584c37bcbd931b2a4fee9a41	16113072	0x330000000000000000346111e1b300000009a7de6c8308cb51e8010201f4ff010088e6a0c2ddd26feeb64f039a2c41296fcb3f5640a0b86991c6218b36c1d19d4a2e9eb0ce3606eb48c02aaa39b223fe8d0a0e5c4f27ead9083c756cc203	16113072	0x2dded46570b4cf879e0083e7f37a9169061075965dfdb54914a42b47fe443954
35	0x967908da4ea1a535d86977b08da2a27ad7c3a33af4d472f05c7e33fb3c6b459e	0x080fb094f580ff0423cf348a9531135330919bc8	0x68b3465833fb72a70ecdf485e0e4c7bd8665fc45	3e+16	0x5ae401dc00000000000000000000000000000000000000000000000000000000638ce63700000000000000000000000000000000000000000000000000000000000000400000000000000000000000000000000000000000000000000000000000000001000000000000000000000000000000000000000000000000000000000000002000000000000000000000000000000000000000000000000000000000000000e4472b43f3000000000000000000000000000000000000000000000000006a94d74f430…	16113072	0x2dded46570b4cf879e0083e7f37a9169061075965dfdb54914a42b47fe443954
36	0x8e899e1f72104a7d7404dbcf1ded10812b3b0a11e695a03b04107ded481b363f	0x46340b20830761efd32832a74d7169b29feb9758	0xdac17f958d2ee523a2206206994597c13d831ec7	0	0xa9059cbb000000000000000000000000119dfe1cb15c3b8e1d3ec614d09dd27e5e5183e6000000000000000000000000000000000000000000000000000000000f851560	16113072	0x2dded46570b4cf879e0083e7f37a9169061075965dfdb54914a42b47fe443954
38	0x8df7eb4f7e9420dd1285977f4d5d8bd7da8c746d7f6bbccf3e9de569e8a69557	0x9249608b274231f1d66c17bc3ecc531dfc39b2a3	0x500e671960ea705ca5ea03fd91f3cbfda1ef3474	8640000000000	0x	16113072	0x2dded46570b4cf879e0083e7f37a9169061075965dfdb54914a42b47fe443954
39	0xb5883cb920671ce2ff9bef6bbac256e17e941515b8bc3a24b17e9a2571a1f785	0x07a6287facbeae3ab55cad0ada9bb46700131d4b	0x9ade9ea6fd4fca08e27db8d2b607e3e30bcb0ab2	0	0x1b9115470000000000000000000000000000000000000000000000000000000000001c9a	16113072	0x2dded46570b4cf879e0083e7f37a9169061075965dfdb54914a42b47fe443954
41	0x328ba8a34528c9599d155c19925a4d5efcf61f47c18aeb7203b5865b3b0a453a	0x4ffa457b42856f6d90d1aece3d177e6a541fc485	0xdac17f958d2ee523a2206206994597c13d831ec7	0	0xa9059cbb0000000000000000000000008cb4bde20898b2f1b71f0e4a3200ad978f11cbae0000000000000000000000000000000000000000000000000000000000c23e90	16113072	0x2dded46570b4cf879e0083e7f37a9169061075965dfdb54914a42b47fe443954
42	0x6359f366b40b43b92c734d2d5d9404969cfe1bab9a6c41cc339d2a594a2011ce	0x80c67432656d59144ceff962e8faf8926599bcf8	0x88ca0e1c12c6e87f5b7b6475786e1982ac95092b	1.15e+17	0x	16113072	0x2dded46570b4cf879e0083e7f37a9169061075965dfdb54914a42b47fe443954
43	0x51e47009b61b4c022ad65a6d8e6acf7dc4f0deb661aad67f1c1e885efc55a6cf	0x78d8cb274034216654a4fb3dc30c2fd3510115cc	0x68b3465833fb72a70ecdf485e0e4c7bd8665fc45	0	0x5ae401dc00000000000000000000000000000000000000000000000000000000638ce637000000000000000000000000000000000000000000000000000000000000004000000000000000000000000000000000000000000000000000000000000000020000000000000000000000000000000000000000000000000000000000000040000000000000000000000000000000000000000000000000000000000000016000000000000000000000000000000000000000000000000000000000000000e4472b4…	16113072	0x2dded46570b4cf879e0083e7f37a9169061075965dfdb54914a42b47fe443954
44	0x0682c0e987e15d7089575da287ffaf818933d9262862f6d4deea1629f4833321	0x46340b20830761efd32832a74d7169b29feb9758	0x0f5d2fb29fb7d3cfee444a200298f468908cc942	0	0xa9059cbb00000000000000000000000011a4cd6e1c576ec919c0eddd8a6a0814a129427b00000000000000000000000000000000000000000000005e8133f7945d940000	16113072	0x2dded46570b4cf879e0083e7f37a9169061075965dfdb54914a42b47fe443954
46	0x6b2ba3993145af33b44b0670bedd0c18fe99b4ac9ee6678a3bb276e0c7fe43b7	0xc67a029818a5cfbaf56677fdf4012abe1bbae97e	0x68b3465833fb72a70ecdf485e0e4c7bd8665fc45	0	0x5ae401dc00000000000000000000000000000000000000000000000000000000638ce62b000000000000000000000000000000000000000000000000000000000000004000000000000000000000000000000000000000000000000000000000000000020000000000000000000000000000000000000000000000000000000000000040000000000000000000000000000000000000000000000000000000000000016000000000000000000000000000000000000000000000000000000000000000e4472b4…	16113072	0x2dded46570b4cf879e0083e7f37a9169061075965dfdb54914a42b47fe443954
47	0x381a21b3b7506f50cd7d405f425697e9c1d4c64dbd20e0009b04604c436f5498	0x46340b20830761efd32832a74d7169b29feb9758	0xeeb1adf36de6606acf4e726b5ba76aa19be5bc52	1.38e+17	0x	16113072	0x2dded46570b4cf879e0083e7f37a9169061075965dfdb54914a42b47fe443954
54	0x0135b6041918ec5f40a35c4e52064a8b0f7f8dc2be2e9a068c96659852e08c17	0x22d134a2bf8ed5cae2d331e1f847a639bf4f6922	0x7f460a59f049fe1235175ff99159ec75a6d6a2b6	5.5e+16	0x	16113072	0x2dded46570b4cf879e0083e7f37a9169061075965dfdb54914a42b47fe443954
57	0xf29f6fbd03463dd1e5e6c2c4a323078b9048558887ec0c1493be4f4d77f7ff55	0x1be210e7990eff6c07cb8cadcb9d077063ac3614	0x5a9a437379439ffb3abb74a67dca4a9731a73b2f	2100000000000000	0x	16113072	0x2dded46570b4cf879e0083e7f37a9169061075965dfdb54914a42b47fe443954
58	0x6c593f1f325c8d3cefb9c2a8fc602da98751f261f797be694b25a357ab6a807e	0x1be210e7990eff6c07cb8cadcb9d077063ac3614	0xa6590361d12d1139c93f74544f5f0a2ffa70d999	2100000000000000	0x	16113072	0x2dded46570b4cf879e0083e7f37a9169061075965dfdb54914a42b47fe443954
59	0x54969b3e338b4cfcc63fe6016ab7f46d4035db6dc9c1ea77ea1b1c8f7a16f8d9	0x3835a225ac952298055ec0b581ce3e920e5bf0ad	0xaf85d4b58e9921b0205bb61c67e249c04871ff4a	0	0xac9650d800000000000000000000000000000000000000000000000000000000000000200000000000000000000000000000000000000000000000000000000000000002000000000000000000000000000000000000000000000000000000000000004000000000000000000000000000000000000000000000000000000000000001000000000000000000000000000000000000000000000000000000000000000084938e3d7b0000000000000000000000000000000000000000000000000000000000000…	16113072	0x2dded46570b4cf879e0083e7f37a9169061075965dfdb54914a42b47fe443954
62	0x79ef23cb4920a098d7267ff4070da0cc86925224696605ac599ab5b08f9a90ec	0x7e212f6045dd847732ae1aed4eb9ef6d1a3746c5	0xeffc18fc3b7eb8e676dac549e0c693ad50d1ce31	0	0x66514c970000000000000000000000007d2768de32b0b80b7a3454c06bdac94a69ddc7a90000000000000000000000000000000000000000000000008ac7230489e8000000000000000000000000000000000000000000000000000000000000000000020000000000000000000000000000000000000000000000000000000000000000	16113072	0x2dded46570b4cf879e0083e7f37a9169061075965dfdb54914a42b47fe443954
63	0x748dc5cb397ce3c8cc2549687e757d94c68504e431ddbeb185257fc1f731979c	0x4f0326d14097df72b0d46f75f05798515c7820cd	0x82653f26045d5852020ab036d2442b8521d1718b	619000000000000	0x	16113072	0x2dded46570b4cf879e0083e7f37a9169061075965dfdb54914a42b47fe443954
64	0x11f0a80ec4e0a20e30796cb07dea93e81c55da577012e466712866f8fd33bde2	0x032f70f3ed991ec09c7ace50b0436beaf24723ee	0x68b3465833fb72a70ecdf485e0e4c7bd8665fc45	2.3e+16	0x5ae401dc00000000000000000000000000000000000000000000000000000000638ce63700000000000000000000000000000000000000000000000000000000000000400000000000000000000000000000000000000000000000000000000000000001000000000000000000000000000000000000000000000000000000000000002000000000000000000000000000000000000000000000000000000000000000e404e45aaf000000000000000000000000c02aaa39b223fe8d0a0e5c4f27ead9083c756…	16113072	0x2dded46570b4cf879e0083e7f37a9169061075965dfdb54914a42b47fe443954
65	0x6f2b8738ab4f8bff17075502bf7a91b9cb776cd9c70825c3246d53943b9b8b2c	0x914ec51e16483c6a0f6ffb8fc3da35cea241cacc	0x0b5365167908035b63041da975bd21e2a881aec1	0	0x095ea7b30000000000000000000000007a250d5630b4cf539739df2c5dacb4c659f2488dffffffffffffffffffffffffffffffffffffffffffffffffffffffffffffffff	16113072	0x2dded46570b4cf879e0083e7f37a9169061075965dfdb54914a42b47fe443954
66	0xeecdc9a5e71fb586da28527c49012ed73401f07908e534d343b33d8debfa5295	0x46340b20830761efd32832a74d7169b29feb9758	0xf411903cbc70a74d22900a5de66a2dda66507255	0	0xa9059cbb00000000000000000000000008398507fce1ff6cea0153be6ef5d19ff0ed9af30000000000000000000000000000000000000000000001326117e60293320000	16113072	0x2dded46570b4cf879e0083e7f37a9169061075965dfdb54914a42b47fe443954
67	0x592d1a26972165298766b06ae29ecc74c6348822ba9c908a088e97a3cefa038b	0xda122cff59fb6c3f3f7bd87e4521d68461d0c3d0	0xdff9ff80fc9acad74b29cda886889fe0f6cf45cf	0	0xd5c8741b00000000000000000000000000000000000000000000001043561a8829300000	16113072	0x2dded46570b4cf879e0083e7f37a9169061075965dfdb54914a42b47fe443954
68	0xd0912d645394743ee939a3ba40f4cfe27bc11dcec87312f706afda8da409a3fe	0x6887246668a3b87f54deb3b94ba47a6f63f32985	0x5e4e65926ba27467555eb562121fac00d24e9dd2	0	0xd0f893440002b47f900000800000050000000000000000000000000000000000002100000000638cdf2d0000f5dd7a00003800000000638cdf2d0000f5dd7c00002400000000638cdf3c0000f5dd7c00000300000000638cdf3c0000f5dd7d789cec7d0738966dd8fff33cf6cc48c8de898684c748b2f78a6c322a237b2b99d9444642dc8ab233b3b76c21a310d919898c10e97fbcbc7d1fef9fe77ebdeaeded3b3a8fc371b89ff3bee67d5dbff3bcaef3bcce0b8284bb8a84e50e63f4382428e0817cdf3ccca…
70	0xee32c2acef4da1aab7d62b85c7b40718f2f14330176a44c661cac5eef1104f90	0x431b5a84acc1297eda88259f300262f1bc3a74f3	0xa69babef1ca67a37ffaf7a485dfff3382056e78c	53253	0x1cff79cd000000000000000000000000fc588723ead01d032b837229577f6a532e5a0c20000000000000000000000000000000000000000000000000000000000000004000000000000000000000000000000000000000000000000000000000000000c41f3cc1fe000000000000000000000000000000000000000000000000000000234f1603ea00000000000000000000000000000000000000000000000011882b99695b36000000000000000000000000000000000000006dedf0c52af0166d716f13975…	16113072	0x2dded46570b4cf879e0083e7f37a9169061075965dfdb54914a42b47fe443954
72	0x60a3a1f0f6a65b8c544b2fe6787d0a8f1121ba4eba223f5a89d70d96df0f3a5c	0x46340b20830761efd32832a74d7169b29feb9758	0xa9c065ecfc15cdcfa2137ae6165e8e42ed7bc81d	1.41e+17	0x	16113072	0x2dded46570b4cf879e0083e7f37a9169061075965dfdb54914a42b47fe443954
73	0x453fa9a38b55592666f6d5e19563ec5226a7dba5ef5984083c67ac9615b3d2d3	0x46340b20830761efd32832a74d7169b29feb9758	0x98268948278e168d57e3409e42b9dfa97f0d7aed	6.27e+16	0x	16113072	0x2dded46570b4cf879e0083e7f37a9169061075965dfdb54914a42b47fe443954
74	0xc2588bc472b79f05b901b816e7df46584321cd2429a4c57239096208146f2b73	0x91aae0aafd9d2d730111b395c6871f248d7bd728	0x98c3d3183c4b8a650614ad179a1a98be0a8d6b8e	0	0xce2e62ff00000000000000000000000000000000000000000000000521499926dead17cf0000000000000000000000000000000000000000000000002e21ff53943594000000000000000000000000006a091a3406e0073c3cd6340122143009adac0eda000000000000000000000000767fe9edc9e0df98e07454847909b5e959d7ca0e000000000000000000000000000000000000000000000000000000000000000100000000000000000000000000000000000000000000000000000000638cdf90	16113072	0x2dded46570b4cf879e0083e7f37a9169061075965dfdb54914a42b47fe443954
76	0x376f761920229d215b01b151bd97ff26e058f105078f7ab446f7c2de92a60703	0x19e2286aaffd7b71f736ad44d4388f889ec40d30	0x3819f64f282bf135d62168c1e513280daf905e06	0	0xf812b9a400000000000000000000000000000000000000000000000000000000000000020000000000000000000000000000000000000000000000000000000000058411	16113072	0x2dded46570b4cf879e0083e7f37a9169061075965dfdb54914a42b47fe443954
77	0xd631000c9d225d62c60ec14f07e1042fa3ea313ac49c5f4d186c4bd00f7741e4	0x46340b20830761efd32832a74d7169b29feb9758	0xdac17f958d2ee523a2206206994597c13d831ec7	0	0xa9059cbb0000000000000000000000000fe22d327e57f86dc81ac90ec06e51820576f9360000000000000000000000000000000000000000000000000000000002859422	16113072	0x2dded46570b4cf879e0083e7f37a9169061075965dfdb54914a42b47fe443954
79	0x5a675159219e277435a423e0ac86744afe4e3449cffab60b4b49e7a4e1279ba5	0x2b17fcfab9ee9208272ab7072d79be14832b1189	0x7a250d5630b4cf539739df2c5dacb4c659f2488d	0	0x791ac94700000000000000000000000000000000000000000007a387a98650cfd3040000000000000000000000000000000000000000000000000000012b4d049fe8e8f900000000000000000000000000000000000000000000000000000000000000a00000000000000000000000002b17fcfab9ee9208272ab7072d79be14832b118900000000000000000000000000000000000000000000000000000000638cdfb7000000000000000000000000000000000000000000000000000000000000000200000…	16113072	0x2dded46570b4cf879e0083e7f37a9169061075965dfdb54914a42b47fe443954
80	0x8002726fa2a4d5f0ba01a1ef9fd965930e7928ce5456e31b89c64452ac8eac9b	0x49a2dcc237a65cc1f412ed47e0594602f6141936	0xc2edad668740f1aa35e4d8f227fb8e17dca888cd	0	0xe2bbb158000000000000000000000000000000000000000000000000000000000000000b0000000000000000000000000000000000000000000000000000000000000000	16113072	0x2dded46570b4cf879e0083e7f37a9169061075965dfdb54914a42b47fe443954
82	0x45da613a12759f1a6f9a3d6c2ccf90565cfa1c30c37b3fe88fd5960c32d246ae	0x778f2e68b5dbe53dc4021c7f3f63f3459a334fda	0x82c7a8f707110f5fbb16184a5933e9f78a34c6ab	0	0xa22cb465000000000000000000000000f42aa99f011a1fa7cda90e5e98b277e306bca83e0000000000000000000000000000000000000000000000000000000000000001	16113072	0x2dded46570b4cf879e0083e7f37a9169061075965dfdb54914a42b47fe443954
86	0x1a7b737fd9a67b2a1d0f50898eae2cb6363c0a12b4c83edb60ceedcd2ffc4dd0	0x088876687ac7c4c60cbc0690a4bfae0971964162	0x14633ea8d5d75f895dfb9d15fe82d0042e7ee042	0	0x39125215000000000000000000000000e60634b495105cd3a912de1da8928732a33d23e000000000000000000000000000000000000000000000000000811f523903bc0000000000000000000000000000000000000000000000000000000000000000c000000000000000000000000000000000000000000000000000000000639619b500000000000000000000000000000000000000000000000000000000000103fb00000000000000000000000000000000000000000000000000000000000000e000000…	16113072	0x2dded46570b4cf879e0083e7f37a9169061075965dfdb54914a42b47fe443954
87	0x2ad71dec28039f3a75b85c3d75e94e7f727756c8347da90578e82d218e6acfaa	0xcc80980def5f4961838afcf3b5fb4db0434abcd7	0x1111111254eeb25477b68fb85ed929f73a960582	0	0x12aa3caf0000000000000000000000003b17056cc4439c61cea41fe1c9f517af75a978f7000000000000000000000000178c820f862b14f316509ec36b13123da19a605400000000000000000000000038d9eb07a7b8df7d86f440a4a5c4a4c1a27e1a080000000000000000000000003b17056cc4439c61cea41fe1c9f517af75a978f7000000000000000000000000cc80980def5f4961838afcf3b5fb4db0434abcd700000000000000000000000000000000000000000000000d8d726b7177a8000000000…	16113072	0x2dded46570b4cf879e0083e7f37a9169061075965dfdb54914a42b47fe443954
88	0x49bbe5c61b46c12de4846165f29b108eaae51268d3d87c63eba72957dc2c683b	0x1be210e7990eff6c07cb8cadcb9d077063ac3614	0xd76e27f0bfcd58401a2715451897d7df2e9df34a	2100000000000000	0x	16113072	0x2dded46570b4cf879e0083e7f37a9169061075965dfdb54914a42b47fe443954
89	0xb44a600c0050d410c749f095eb995a153f794a9a4e234ef42a82049cfc1ebb3b	0xf2f5c73fa04406b1995e397b55c24ab1f3ea726c	0x388c818ca8b9251b393131c08a736a67ccb19297	5.84e+16	0x	16113072	0x2dded46570b4cf879e0083e7f37a9169061075965dfdb54914a42b47fe443954
90	0xd245dbce0a27500ae25c94c456b50e7f744734dbbfd2d58e0bf177c3f66148c4	0x485daa8ffd443f72842f287335b5c20cf39304c7	0x24eae513f4df5fabebed6ff8f29c9fea33a2412f	3.97e+16	0x	16113072	0x2dded46570b4cf879e0083e7f37a9169061075965dfdb54914a42b47fe443954
91	0xe1a18f4019dc499e471e603ae4a4cb4aa3abb80e5b4dc1565e882bb50438bddb	0xd029e10428827e05bf265e4b052657c8e47c3248	0x2a7334c0361b33526f2793e808a4b79d0b87af20	0	0xa22cb4650000000000000000000000001e0049783f008a0085193e00003d00cd54003c710000000000000000000000000000000000000000000000000000000000000001	16113072	0x2dded46570b4cf879e0083e7f37a9169061075965dfdb54914a42b47fe443954
95	0x5695e045a113263ecaa8a2a8113d3eec6c45c223ad0dc3e12fe65c794c0587e0	0x3b794929566e3ba0f25e4263e1987828b5c87161	0x8f1f786dbd944d6c682a93ed7ad77a6df2935f7c	2.01e+16	0x	16113072	0x2dded46570b4cf879e0083e7f37a9169061075965dfdb54914a42b47fe443954
96	0x8c3f5599c66871ecaa1e3486673be871e85028bf652c0e89b83f6f6f14c1d78d	0xae45a8240147e6179ec7c9f92c5a18f9a97b3fca	0x181d5a4fcd76fa3cc5d6e00292ed3e7e8afd548c	484000000000000	0x	16113072	0x2dded46570b4cf879e0083e7f37a9169061075965dfdb54914a42b47fe443954
101	0x92d3872c54a1dacbd18e8b3c1d24d8724a73b6a40cb6d0f7f1acce95680c432f	0x46340b20830761efd32832a74d7169b29feb9758	0xdac17f958d2ee523a2206206994597c13d831ec7	0	0xa9059cbb00000000000000000000000026620868f5623bf8cf948949b7935c534162b7380000000000000000000000000000000000000000000000000000000023c36d10	16113072	0x2dded46570b4cf879e0083e7f37a9169061075965dfdb54914a42b47fe443954
103	0x4e4241e946afd3e0d8c25714ef96e6e6d52b98b754ac2d8478b94e203e095303	0x485daa8ffd443f72842f287335b5c20cf39304c7	0xa1d36c91a7fad71d4eaed10fe469f45e2eee22ae	7.94e+16	0x	16113072	0x2dded46570b4cf879e0083e7f37a9169061075965dfdb54914a42b47fe443954
104	0x76e5f9169c5c7699b3e5e77e12635f18c48d7a96325376671a9014c0cca84578	0x63e351ef8af24938a6a1e12316cce24a1adff7e0	0xe0d9143cb0bdb09e335a87e139d79bcbddd9921f	6510000000000000	0x	16113072	0x2dded46570b4cf879e0083e7f37a9169061075965dfdb54914a42b47fe443954
106	0x24900afad8fa9e3684638cb7a0e87c4868b85a899d1f93d8651c59cddcc362a7	0x9fb438f1a292fbdaf4f569a8f2e2e2972c0172ec	0xd9e1ce17f2641f24ae83637ab66a2cca9c378b9f	100000000000000	0x7ff36ab500000000000000000000000000000000000000000000000001bc43cd35d537a300000000000000000000000000000000000000000000000000000000000000800000000000000000000000009fb438f1a292fbdaf4f569a8f2e2e2972c0172ec00000000000000000000000000000000000000000000000000000000638ce6370000000000000000000000000000000000000000000000000000000000000002000000000000000000000000c02aaa39b223fe8d0a0e5c4f27ead9083c756cc200000…	16113072	0x2dded46570b4cf879e0083e7f37a9169061075965dfdb54914a42b47fe443954
107	0x0029bed8478831593d8c1f485ad4dea2f1ccebcb1aaada1d06e8eaed5cf6fc1b	0x3ba0781d1fa26477797d73078016546f7e615d88	0x7732674b5e5ffec4785aefdaea807eeca383b5e6	0	0x2e7ba6ef00000000000000000000000000000000000000000000000000000000000068b90000000000000000000000003ba0781d1fa26477797d73078016546f7e615d88000000000000000000000000000000000000000000b5dc00e411f2a00000000000000000000000000000000000000000000000000000000000000000000000800000000000000000000000000000000000000000000000000000000000000011a16440d1aa9881ebfbe031c5b9c4205a6e237e5e14192657cb8582826b02fe7e3dac2…	16113072	0x2dded46570b4cf879e0083e7f37a9169061075965dfdb54914a42b47fe443954
108	0x6a77cc7f87b1c1b29a07586a26fd4a9237d11a0b12ce80755b84a6e9bd6cbab9	0x6dfc34609a05bc22319fa4cce1d1e2929548c0d7	0x8dcaa28d625f11e263fa04061f3469357f344baf	6.38e+16	0x	16113072	0x2dded46570b4cf879e0083e7f37a9169061075965dfdb54914a42b47fe443954
109	0x14885d04c94beeeb9b6ea811950eeea9a39b3a0a87f4e8376a9899edacac5b8f	0x0f493931981ef166bc2faf0de4324f8a26bad0c2	0x76f4eed9fe41262669d0250b2a97db79712ad855	0	0xf17a454600000000000000000000000000000000000000000000000000000000000000c000000000000000000000000000000000000000000000000000000000000001a00000000000000000000000000000000000000000000000000000000464063e800000000000000000000000000000000000000000000000000000000458c8bde00000000000000000000000001d64fb0ffa8362b2e1ee7ee03929159551eab26e000000000000000000000000000000000000000000000000000000000000022000000…	16113072	0x2dded46570b4cf879e0083e7f37a9169061075965dfdb54914a42b47fe443954
110	0x8b2c6c068189d572dfc887d2c08d380acc976da6e4e40e94948a148da9f4bce2	0x9723b6d608d4841eb4ab131687a5d4764eb30138	0xdac17f958d2ee523a2206206994597c13d831ec7	0	0xa9059cbb000000000000000000000000d4f1981b061248e93fdce471b51347330d67c98c0000000000000000000000000000000000000000000000000000000003657090	16113072	0x2dded46570b4cf879e0083e7f37a9169061075965dfdb54914a42b47fe443954
112	0x8478a2d2b300819d8e9c4acde8d9341953d7ee7f6f7b388249dcaab779fa37eb	0x0b58c3e6d05f8311f44497296ef6753e8885a1c2	0xff1f2b4adb9df6fc8eafecdcbf96a2b351680455	7.18e+16	0x7ff48afb000000000000000000000000000000000000000000000000000000000000000000000000000000000000000000000000000000000000000000ff416015d280000000000000000000000000000b58c3e6d05f8311f44497296ef6753e8885a1c20000000000000000000000000000000000000000000000000000000000000000	16113072	0x2dded46570b4cf879e0083e7f37a9169061075965dfdb54914a42b47fe443954
113	0xd1e0d57612a298f136cd60e2542f40f04f3ad626aa1c2aff6723675e6d5878cc	0x893a3bd9fe9b0f8f2230db3b034f9af8dd34b177	0x6779821052e8c6cf67f6f834c6e06b8aa752044a	0	0xa9059cbb000000000000000000000000a95ff86218304151adbc4180ec720fad8ee55fe40000000000000000000000000000000000000000000000c1a37542bb9f500000	16113072	0x2dded46570b4cf879e0083e7f37a9169061075965dfdb54914a42b47fe443954
115	0x5b109c0cc17e5ad3f4ec318b38639c36c024d499399c2ecd04c5e1dfd9f20109	0x1be210e7990eff6c07cb8cadcb9d077063ac3614	0x80f5fd7098b2b7491dd43e9146f01d06c6c46606	2100000000000000	0x	16113072	0x2dded46570b4cf879e0083e7f37a9169061075965dfdb54914a42b47fe443954
120	0xb100c9eebc22b06add65a21c8cecff7db7f061f4fda0c6da4135623da0aa27ab	0xd24400ae8bfebb18ca49be86258a3c749cf46853	0x5f65f7b609678448494de4c87521cdf6cef1e932	0	0x96aa736800000000000000000000000000000000000000000000000000000000000000200000000000000000000000000000000000000000000000000000000000000001000000000000000000000000794232494ac08b582d7b1a2f83dedb8667451bc4	16113072	0x2dded46570b4cf879e0083e7f37a9169061075965dfdb54914a42b47fe443954
121	0x045b473ad07c54408ee8fc9e37812c194f01b8f5cdecae6ad06aea4b6a19cac8	0x77ab999d1e9f152156b4411e1f3e2a42dab8cd6d	0xdac17f958d2ee523a2206206994597c13d831ec7	0	0xa9059cbb000000000000000000000000effbccd3bf557992d97c9caf70e542dba06dc48c000000000000000000000000000000000000000000000000000000002bfc6040	16113072	0x2dded46570b4cf879e0083e7f37a9169061075965dfdb54914a42b47fe443954
124	0xde231ba47ae39a0ed02d6d58524b813fccecf6e9d1be0e3f837148ac66756490	0x0acdd0fefb605957dfcba4816d77c43dec3f1f79	0x0214c292b8e53e3a808af2567c840ec1df9e2725	3000000000000000	0x	16113072	0x2dded46570b4cf879e0083e7f37a9169061075965dfdb54914a42b47fe443954
125	0x26f372ab36348130cb341b0fe24e4f4b8564a293df5575c65bed01c8199a9ccd	0x55f089d5f6aedfdacbd5e3acb0e8f31fbab44088	0x711c0139aba68542a768f24964a801a93500d24d	8.6e+16	0x5357415054583a307833366631313738343435656337363134373437373730633663623635313466326531616163353532353963353365323036656164383736363932343462393163	16113072	0x2dded46570b4cf879e0083e7f37a9169061075965dfdb54914a42b47fe443954
126	0x20e761fa318bd00bf0373a1f009e16061d0d487a5df31da854f6e750536d4d8e	0x15e556150006c3048c604d9a1a6c58673a7d4d2a	0xdac17f958d2ee523a2206206994597c13d831ec7	0	0xa9059cbb0000000000000000000000002d4f4e74ccb2c5e6e761b945123cdc473f95fef40000000000000000000000000000000000000000000000000000000000079d72	16113072	0x2dded46570b4cf879e0083e7f37a9169061075965dfdb54914a42b47fe443954
127	0x75ca434a63a8c9f2522b00fa73da675889b8377b7e0a83dfc570b5e3afa5c7ac	0xddd92457d6153c90f2f5e09478e542b932b8427c	0x8e8f404616c22d2a11ce61b9837e0cb53241fbcb	3000000000000000	0xa0712d680000000000000000000000000000000000000000000000000000000000000003	16113072	0x2dded46570b4cf879e0083e7f37a9169061075965dfdb54914a42b47fe443954
132	0x35e909d3c9436c07b8ddddd1c7c091b599e81393b1458eb3163e6009949c35d3	0x87cbc48075d7aa1760ac71c41e8bc289b6a31f56	0xa0b86991c6218b36c1d19d4a2e9eb0ce3606eb48	0	0xa9059cbb000000000000000000000000820d1e7d443debbcf3c8fa265deea8add9e67fcb0000000000000000000000000000000000000000000000000000000002890600	16113072	0x2dded46570b4cf879e0083e7f37a9169061075965dfdb54914a42b47fe443954
135	0x1ead28c00a2ec65f1f67c317d0e7b9a87de04ecb60c17fac2439919cf4408f55	0x3010b8ebdffcc76831574d923a1d80d1a203f11c	0xb6bbe79b03b8865f994cd4917729e168162f7800	1000000000000000	0x	16113072	0x2dded46570b4cf879e0083e7f37a9169061075965dfdb54914a42b47fe443954
136	0x3ab6f86b19e2ab27e526e20f161f34cd2bc71363b38549fac057eeebc15396ec	0x0636f09d2200e111466e637ad1e7ed80bb6d1172	0x046e404c89fae4d1d12ee3ef23cfd46b404fe1dc	2000000000000000	0x	16113072	0x2dded46570b4cf879e0083e7f37a9169061075965dfdb54914a42b47fe443954
138	0xde4719ad8b4d2693b1fddba0a4fe9343247cc7bcddd7582e4fe1591aa308d565	0x46340b20830761efd32832a74d7169b29feb9758	0x36bfe8e1a67e50fbffc1ab4b7e4d619e4066605b	7.42e+16	0x	16113072	0x2dded46570b4cf879e0083e7f37a9169061075965dfdb54914a42b47fe443954
139	0x17da24d1a760822ba162dfe224cdf9744bb15581ade75754f90893b0ba10b3f3	0xd7448ac7def54aad4b2c5c3a892a8bd694c3e7b4	0x4e5b2e1dc63f6b91cb6cd759936495434c7e972f	3060000000000000	0x	16113072	0x2dded46570b4cf879e0083e7f37a9169061075965dfdb54914a42b47fe443954
140	0x95c419545fb95abca34914ad3bdfa8f007f966654f114c971dd315523f0dda97	0x46340b20830761efd32832a74d7169b29feb9758	0xdac17f958d2ee523a2206206994597c13d831ec7	0	0xa9059cbb0000000000000000000000007cb3e4dbfcd4f24e38fcc21802791fff3d4d206300000000000000000000000000000000000000000000000000000000055d4a80	16113072	0x2dded46570b4cf879e0083e7f37a9169061075965dfdb54914a42b47fe443954
142	0x7cfed4fb093ef32c19ce1af4b69f31b60c99006d6218d5d3e26ae67a87176514	0x778f2e68b5dbe53dc4021c7f3f63f3459a334fda	0x82c7a8f707110f5fbb16184a5933e9f78a34c6ab	0	0xa22cb4650000000000000000000000001e0049783f008a0085193e00003d00cd54003c710000000000000000000000000000000000000000000000000000000000000001	16113072	0x2dded46570b4cf879e0083e7f37a9169061075965dfdb54914a42b47fe443954
144	0x8910a0e504b65b5298709cdd5a7fb63a176367d0623d57e22f3a39c705e7caf6	0x11b7e01c575e0be5334b2aa491c5600fc8e2da50	0xcd041f40d497038e2da65988b7d7e2c0d9244619	0	0xa22cb4650000000000000000000000001e0049783f008a0085193e00003d00cd54003c710000000000000000000000000000000000000000000000000000000000000000	16113072	0x2dded46570b4cf879e0083e7f37a9169061075965dfdb54914a42b47fe443954
145	0x6e94b65df26016fd006c49400631fe6e12f929671308ab42dcd6c977fc26a19d	0x46340b20830761efd32832a74d7169b29feb9758	0xdac17f958d2ee523a2206206994597c13d831ec7	0	0xa9059cbb000000000000000000000000ff939b536e8a8770d309c1bca6bdc550c00b2e5e00000000000000000000000000000000000000000000000000000000055d4a80	16113072	0x2dded46570b4cf879e0083e7f37a9169061075965dfdb54914a42b47fe443954
146	0x0b82e2b051953cb8719b401c770de4ff8e3ec4aae10e504938ad108d5df8ce4e	0xf60c2ea62edbfe808163751dd0d8693dcb30019c	0xdac17f958d2ee523a2206206994597c13d831ec7	0	0xa9059cbb000000000000000000000000b45cb9a930a2fd268c82db565d15f880df38a8750000000000000000000000000000000000000000000000000000000005039a7d	16113072	0x2dded46570b4cf879e0083e7f37a9169061075965dfdb54914a42b47fe443954
147	0x408725193dbf00c18559f3e167cf7a59f62eda4a364336d0f526eded2604946a	0xcd92beea441abd5d3a8fc166a5535ab3ab258932	0xdae2057f69276ae7ba54643aa95079283247de82	1.32e+17	0x	16113072	0x2dded46570b4cf879e0083e7f37a9169061075965dfdb54914a42b47fe443954
151	0xaf0506de6ab83c4d07cbfb4d09af3d4ded676c718775e1b98be82932f5ffa65a	0x3cd751e6b0078be393132286c442345e5dc49699	0xed89fd53f413539c00ea3fc20546956af19b02b1	3960000000000000	0x	16113071	0x614ecb915ce83903f29979c30132a04dc5f21f951d8f66338f5bfeb03c2429a3
152	0x54546af32a3f17cede2773259ca5108acdde472eed3bd48ee02cafa1d48e347b	0x19d41c96fe9b9dd66e474d96cc5f8b566aaab6d7	0x68b3465833fb72a70ecdf485e0e4c7bd8665fc45	2e+18	0x5ae401dc00000000000000000000000000000000000000000000000000000000638ce61f00000000000000000000000000000000000000000000000000000000000000400000000000000000000000000000000000000000000000000000000000000001000000000000000000000000000000000000000000000000000000000000002000000000000000000000000000000000000000000000000000000000000000e404e45aaf000000000000000000000000c02aaa39b223fe8d0a0e5c4f27ead9083c756…	16113071	0x614ecb915ce83903f29979c30132a04dc5f21f951d8f66338f5bfeb03c2429a3
153	0xc9182711a2ec6dc9b670d9f294d33b3ebc521e82d2ffce30d2891ad97ad70e22	0x0acdd0fefb605957dfcba4816d77c43dec3f1f79	0x4e32d55e2dc457fbbdece0417932462fd4af1dc1	3000000000000000	0x	16113071	0x614ecb915ce83903f29979c30132a04dc5f21f951d8f66338f5bfeb03c2429a3
155	0x26d55895637d9dd7f88f01fe9fda8b2ba0f4f2a481e0934f592bb99265c1d202	0x19e2286aaffd7b71f736ad44d4388f889ec40d30	0x3819f64f282bf135d62168c1e513280daf905e06	0	0xf812b9a40000000000000000000000000000000000000000000000000000000000000005000000000000000000000000000000000000000000000000000000000005d59a	16113071	0x614ecb915ce83903f29979c30132a04dc5f21f951d8f66338f5bfeb03c2429a3
159	0x5dc3a7a3ad234d34909b418a9999a8ca0e35ffdd4a5bee06b89445f93a7cbdb1	0x81196bb8d26b08ecc32e24a26664a3ce57af8b49	0xc6dca8e9c9eb5a7eb68b04a69e63352d5d98695c	0	0xa22cb4650000000000000000000000001e0049783f008a0085193e00003d00cd54003c710000000000000000000000000000000000000000000000000000000000000001	16113071	0x614ecb915ce83903f29979c30132a04dc5f21f951d8f66338f5bfeb03c2429a3
163	0x593c7b9e0d96d8e82109403855dd0cf1b2dc0f877f24a559ab26c4684b45dee3	0x7c2b528838d5c8b676b4a99ee72e20d7a5d62d54	0xa0b86991c6218b36c1d19d4a2e9eb0ce3606eb48	0	0x095ea7b300000000000000000000000076f4eed9fe41262669d0250b2a97db79712ad855ffffffffffffffffffffffffffffffffffffffffffffffffffffffffffffffff	16113071	0x614ecb915ce83903f29979c30132a04dc5f21f951d8f66338f5bfeb03c2429a3
164	0x94d310d590b60789edf00c2bed2d315953fb4bd2bafe31234cc7eb078b95c27d	0xca88813dcd523b5e6a4cd7b3ea6080c68a219200	0x009c3384acfc4a9d61b26d6e8e2cdb1a0da7beb5	159000000000000	0x	16113071	0x614ecb915ce83903f29979c30132a04dc5f21f951d8f66338f5bfeb03c2429a3
166	0x58f8f66b2dfa363cc971385a918aaf9996dc408fe363a31ff0dc750bab59d058	0x7830c87c02e56aff27fa8ab1241711331fa86f43	0xa9d1e08c7793af67e9d92fe308d5697fb81d3e43	0	0xca350aa60000000000000000000000000000000000000000000000000000000000000040000000000000000000000000000000000000000000000000000000000003d090000000000000000000000000000000000000000000000000000000000000000600000000000000000000000077fba179c79de5b7653f68b5039af940ada60ce000000000000000000000000073f9b272abda7a97cb1b237d85f9a7236edb6f1600000000000000000000000000000000000000000000006635cab07d539a000000000…	16113071	0x614ecb915ce83903f29979c30132a04dc5f21f951d8f66338f5bfeb03c2429a3
167	0xcd9511ddcf517d404655c511216215150d3017f120f64775820259348546a9d3	0x911c42f0a51ff15bd65f4e7b963e546656d1cf64	0x974caa59e49682cda0ad2bbe82983419a2ecc400	1.78e+18	0x	16113071	0x614ecb915ce83903f29979c30132a04dc5f21f951d8f66338f5bfeb03c2429a3
168	0x010d4cc7e3f40899575e2222c0b8acacdeba418145d4b98edbdcbcdabb05ddc9	0xb5d85cbf7cb3ee0d56b3bb207d5fc4b82f43f511	0x7d462f162ba323e96cfc2f1cc08bde55f4638e98	784000000000000	0x	16113071	0x614ecb915ce83903f29979c30132a04dc5f21f951d8f66338f5bfeb03c2429a3
169	0xb700f2c951b77be5ea568b16fd425a7521d52361e7d0829da41c4a102748c315	0x1be210e7990eff6c07cb8cadcb9d077063ac3614	0x8db81bc0525a3ff808606a93154abd321e68a535	2100000000000000	0x	16113071	0x614ecb915ce83903f29979c30132a04dc5f21f951d8f66338f5bfeb03c2429a3
170	0xa75c95ea772c18cad5317582e93da01d70dda9ec280c80c0ef036a07b2e9e444	0x02d3e09e03396a4a3a91061db7a2098eea330eb8	0xa0c68c638235ee32657e8f720a23cec1bfc77c77	0	0xe3dec8fb00000000000000000000000002d3e09e03396a4a3a91061db7a2098eea330eb80000000000000000000000003845badade8e6dff049820680d1f14bd3903a5d00000000000000000000000000000000000000000000000000000000000000060000000000000000000000000000000000000000000000000000000000000002000000000000000000000000000000000000000000000003710fcf0f389920000	16113071	0x614ecb915ce83903f29979c30132a04dc5f21f951d8f66338f5bfeb03c2429a3
171	0xee1db023ac047f21464d606cc4e9f232f130376876625d583b34cff4d61d1cee	0xa9831d89c4067bf7518efbcb6351ef6dd0059f33	0xdac17f958d2ee523a2206206994597c13d831ec7	0	0x23b872dd00000000000000000000000043362a27650a45eac7323e63d8923772d01784cd00000000000000000000000080db6c223f9c0c2435f0a025862d9fb205751bc00000000000000000000000000000000000000000000000000000000000000000	16113071	0x614ecb915ce83903f29979c30132a04dc5f21f951d8f66338f5bfeb03c2429a3
172	0x5652c4594f59c5b78d6d725f2e553ef7f6bad001b690dc127621e52ecf6615cd	0x710bda329b2a6224e4b44833de30f38e7f81d564	0xb8901acb165ed027e32754e0ffe830802919727f	0	0x23c452cd0000000000000000000000004ceff89cb2aedd354908f10d274db04b7e6dca8b000000000000000000000000000000000000000000000000000dc8185e9ec777a7f245047b400bc1132ee89db2ab0f7620939dd64844453cdcf5525159a0cbf300000000000000000000000000000000000000000000000000063c650dbeb403	16113071	0x614ecb915ce83903f29979c30132a04dc5f21f951d8f66338f5bfeb03c2429a3
173	0x50b89467286aa6e4ed60977ff9b3ef37534d4800acae2998e8c2edf0d5f8bfb7	0x6c274c0b4398f01f0e654bf2d0c46e0ce4f4781f	0xeeeec6476073778077b40a73fe32e23a9876cab4	7.94e+16	0x2b66d72e000000000000000000000000000000000000000000000000000000000000002000000000000000000000000000000000000000000000000000000000000000ea65794a68624763694f694a46557a49314e694973496d74705a434936496a64684e6a526c5a6d51314c544a694e4463744e475a6a5a6931684f4463784c5445785a6d59354f5451345954646a4f434a392e436751784d6a553545674e56553051614a4451774e325a6c5a4755784c57557a4f4459744e444d325a4331684e44466d4c5…	16113071	0x614ecb915ce83903f29979c30132a04dc5f21f951d8f66338f5bfeb03c2429a3
174	0x6278aca8adc5738a3444781649071298eedc6f5fe274176bdc6b3bc793cd67c3	0x21a31ee1afc51d94c2efccaa2092ad1028285549	0x9a6f91f5743f0fb95d9c1a800d3419f989bc25d5	1.31e+16	0x	16113071	0x614ecb915ce83903f29979c30132a04dc5f21f951d8f66338f5bfeb03c2429a3
175	0x40e8476b2b4b935474789c78301286d13065f558e39c56c00cc42f06b9aeadd2	0x8ca4cb4b261d4e26fafd4bd40427a2b2dc93413c	0x75cda57917e9f73705dc8bcf8a6b2f99adbdc5a5	0	0x2e4dbe8f000000000000000000000000000000000000000000000000000000000000254000000000000000000000000091eeda83433690056e22fe33f0e2ffc754ba107600000000000000000000000000000000000000000000000000000000043b966c000000000000000000000000000000000000000000000000000000000000254000000000000000000000000000000000000000000000000000000000000000a000000000000000000000000000000000000000000000000000000000000000415d9b3…	16113071	0x614ecb915ce83903f29979c30132a04dc5f21f951d8f66338f5bfeb03c2429a3
176	0x21009f64434a7665830165e42c373a41297230fe2b415da7d8d69f13cb47c1be	0xfe5cf5bb83efde3120564f6cc3d33b80be65491e	0x000000000000ad05ccc4f10045630fb830b95127	1.32e+18	0x9a1fc3a70000000000000000000000000000000000000000000000000000000000000040000000000000000000000000000000000000000000000000000000000000036000000000000000000000000000000000000000000000000000000000000000e0000000000000000000000000000000000000000000000000000000000000001b60e6095279c619c4aea49b4834cf2fe63bd64adbcf6bc961482ca555bf3ac1be43c502517747acce979c23fd4c9f5f0bec1b8f68e47ba52d4e41250e6899744d00000…	16113071	0x614ecb915ce83903f29979c30132a04dc5f21f951d8f66338f5bfeb03c2429a3
177	0x0800c9a42976c847b45f516bad09f833d64b2f122c93a87323b926094efff67f	0x9c8d8642c20b568f9eb4248cfe49bb220451dcb0	0x394e3d3044fc89fcdd966d3cb35ac0b32b0cda91	0	0xa22cb46500000000000000000000000000000000000111abe46ff893f3b2fdf1f759a8a80000000000000000000000000000000000000000000000000000000000000001	16113071	0x614ecb915ce83903f29979c30132a04dc5f21f951d8f66338f5bfeb03c2429a3
179	0xd72e75fbdfb1ea89332a40b2c993f9d60cbf29358e538503476ae770e6ead9ae	0xeebc223377e4b9842c4fc4bce815a98f2eee1574	0xdac17f958d2ee523a2206206994597c13d831ec7	0	0xa9059cbb000000000000000000000000fb1141ae80c88a59286ea3d75880a9c6ed0b2daf000000000000000000000000000000000000000000000000000000105eebfa00	16113071	0x614ecb915ce83903f29979c30132a04dc5f21f951d8f66338f5bfeb03c2429a3
180	0xb1b5309da3f3743bce3b7fa36a7041d73abae269c43e40f4a6c44396b4a63ceb	0x839d4641f97153b0ff26ab837860c479e2bd0242	0x1111111254eeb25477b68fb85ed929f73a960582	0	0x0502b1c5000000000000000000000000761d38e5ddf6ccf6cf7c55759d5210750b5d60f3000000000000000000000000000000000000000014452270f3426d6e8d0792ea00000000000000000000000000000000000000000000000015d5e9d70b0073540000000000000000000000000000000000000000000000000000000000000080000000000000000000000000000000000000000000000000000000000000000140000000000000003b6d03407b73644935b8e68019ac6356c40661e1bc315860e26b9…	16113071	0x614ecb915ce83903f29979c30132a04dc5f21f951d8f66338f5bfeb03c2429a3
181	0x119ddd3d8f2071ce79c3f2210afbb2b4ee3ad57ab90e73d33cf4f0455ded0a53	0x3cbd125486ec091b57d18560a34ce6750873bdb8	0x401f6c983ea34274ec46f84d70b31c151321188b	0	0x8b9e4f930000000000000000000000007d1afa7b718fb893db30a3abc0cfc608aacfebb00000000000000000000000003cbd125486ec091b57d18560a34ce6750873bdb8000000000000000000000000000000000000000000000000efc87a60623cf832	16113071	0x614ecb915ce83903f29979c30132a04dc5f21f951d8f66338f5bfeb03c2429a3
182	0x6f411a8f8a7c45320734f31289377ebc6581328f238b9ab41c212d52bb967472	0x3afaaed9031a8aa2d8d4b8f88d1428d9b46050e9	0x7a250d5630b4cf539739df2c5dacb4c659f2488d	0	0x791ac94700000000000000000000000000000000000000000004bbe1f7e25db4247ba9a700000000000000000000000000000000000000000000000000c71e5550ae2fc800000000000000000000000000000000000000000000000000000000000000a00000000000000000000000003afaaed9031a8aa2d8d4b8f88d1428d9b46050e900000000000000000000000000000000000000000000000000000000638ce18c000000000000000000000000000000000000000000000000000000000000000200000…	16113071	0x614ecb915ce83903f29979c30132a04dc5f21f951d8f66338f5bfeb03c2429a3
183	0xebff754cd5a2777f1109fc07caed2aa0bb9cf681526d3d633599bd8646f49ce0	0xe68218947abbb2cca086f2130de76a251d89bde3	0xff1f2b4adb9df6fc8eafecdcbf96a2b351680455	3.43e+16	0x7ff48afb00000000000000000000000000000000000000000000000000000000000000000000000000000000000000000000000000000000000000000079c97a76e68000000000000000000000000000e68218947abbb2cca086f2130de76a251d89bde30000000000000000000000000000000000000000000000000000000000000000	16113071	0x614ecb915ce83903f29979c30132a04dc5f21f951d8f66338f5bfeb03c2429a3
184	0xfe53e48a38f1354f5f9a21ec38ad2e16cf6af3f2b7d8eccf43875d6b5d3a3cee	0xdfd5293d8e347dfe59e90efd55b2956a1343963d	0xe3876545dcbfbd30d7876c3d13288f5ff68a2c23	1e+18	0x	16113071	0x614ecb915ce83903f29979c30132a04dc5f21f951d8f66338f5bfeb03c2429a3
185	0x33e2ab6768b588211ab76e946d744853206f474f38de8e79463f124752cbd45d	0x9249608b274231f1d66c17bc3ecc531dfc39b2a3	0x7e4d092e6e84d52dd6fdb9eba433ff9854e8bc3f	3170000000000000	0x	16113071	0x614ecb915ce83903f29979c30132a04dc5f21f951d8f66338f5bfeb03c2429a3
186	0x77e3f463c83aa420309590380e60b287df43dd5bbb75e5ed0f524070207e251c	0x58dd351901fee916b9d4d24d48ffca32feda6ce3	0x086b656140b30f53fe886023e971a4a5beffe54f	0	0x65f8c6c5000000000000000000000000345022728385f127b2e9bcc335f6e3d6a378c69d	16113071	0x614ecb915ce83903f29979c30132a04dc5f21f951d8f66338f5bfeb03c2429a3
187	0x042672bd18db93758b1efc1ab85403253fd454d7637d5ea18c0c831494d6eb42	0xa9831d89c4067bf7518efbcb6351ef6dd0059f33	0xdac17f958d2ee523a2206206994597c13d831ec7	0	0x23b872dd000000000000000000000000ca4d9e552c63593acbf6ebcdf09f71252edf0d98000000000000000000000000e11b8b2b645603b1625d7663131828d9f61738230000000000000000000000000000000000000000000000000000000000000000	16113071	0x614ecb915ce83903f29979c30132a04dc5f21f951d8f66338f5bfeb03c2429a3
188	0x99b5ce52d4f06f89e31f80bfefe775a93daf3694ff2049c9973616adb7f6011b	0x1be210e7990eff6c07cb8cadcb9d077063ac3614	0x2fbabe212a2b02e43832566e5293bc80d01ca09a	2100000000000000	0x	16113071	0x614ecb915ce83903f29979c30132a04dc5f21f951d8f66338f5bfeb03c2429a3
190	0x8ba1c3cb7b1f484e9177b904318497b64cfaaf56e5a463df203f798466ac51b8	0xdfd5293d8e347dfe59e90efd55b2956a1343963d	0xcc8fa225d80b9c7d42f96e9570156c65d6caaa25	0	0xa9059cbb00000000000000000000000001740813c1a8d68e743f7a20b890bbe36d93500c0000000000000000000000000000000000000000000000000000000000003a48	16113071	0x614ecb915ce83903f29979c30132a04dc5f21f951d8f66338f5bfeb03c2429a3
191	0x84e2f8a69d98d99bf93d30a35787ec6d3f7720d52b32ad0755e3680268c3a3d0	0xa9831d89c4067bf7518efbcb6351ef6dd0059f33	0xdac17f958d2ee523a2206206994597c13d831ec7	0	0x23b872dd000000000000000000000000f76510c29098dbb9e6d366ea2001b8cbcc96b3de000000000000000000000000a36b0d374c99ff703f1c62e58f86243f5e0ef7e80000000000000000000000000000000000000000000000000000000000000000	16113071	0x614ecb915ce83903f29979c30132a04dc5f21f951d8f66338f5bfeb03c2429a3
192	0xc42d07adb844f2575ad32379dec86b5e7b2b4c48039b331179a5705f58065c0e	0xd108fd0e8c8e71552a167e7a44ff1d345d233ba6	0xdc442fcfbbdecd7931009a41d97f7e50e0e559b2	2.22e+16	0x	16113071	0x614ecb915ce83903f29979c30132a04dc5f21f951d8f66338f5bfeb03c2429a3
193	0x1bae7f30c63649e794096fdd0b825e22358e3f437165f7c042a4aa15a077ddd2	0xc41e0653905b8e0475b5f95f55c2ff03d6b4a75b	0x00000000007079010d6e70a9b6e6d70a43f58300	0	0x0110d6db8c60b5523f098bbd6bdbc9bbdf3abb0f621e0b2992079b620aa13a7c2e7c88d2e1e18e46e9002710000000000000000300b900000000000000000000002c787d8cf4ca3ba65e0784449d001870ad0000000000	16113071	0x614ecb915ce83903f29979c30132a04dc5f21f951d8f66338f5bfeb03c2429a3
195	0x7821109e2bbdf9d6d08acb6e12339234c969d736ea7331a2ba9c111679a4b4f2	0xcfc5c04397832c5ffc9173cce4144f5ec9fac66d	0x0fb9deda6eebad64b6ec3934f6cbc3dcefe9fae3	1.5e+16	0x	16113071	0x614ecb915ce83903f29979c30132a04dc5f21f951d8f66338f5bfeb03c2429a3
197	0x2d76cfc9daea6aa85de6e6633397010d4b6e53749af10592970e91a6588e6dea	0x71660c4005ba85c37ccec55d0c4493e66fe775d3	0x2cbb66a61ec78bbfb756112a4f243e9dcc2fac68	3.96e+16	0x	16113071	0x614ecb915ce83903f29979c30132a04dc5f21f951d8f66338f5bfeb03c2429a3
198	0x6b50149735a3bfda5a7cf3c637bf7a0a7752e9fb660701f5398a241f06f22be9	0x6dfc34609a05bc22319fa4cce1d1e2929548c0d7	0xc7fc73dc257d699bcc11df7d81ea9b7cf8481030	681000000000000	0x	16113071	0x614ecb915ce83903f29979c30132a04dc5f21f951d8f66338f5bfeb03c2429a3
201	0x336d65e8956a8fd5797f2e4b07b78073e464092093269c135d30fcb2410ffd1d	0x1be210e7990eff6c07cb8cadcb9d077063ac3614	0xf281376d8deb2544747fec77279a9ce77078f093	2100000000000000	0x	16113071	0x614ecb915ce83903f29979c30132a04dc5f21f951d8f66338f5bfeb03c2429a3
202	0x2cfce3f465907dcd5c3fef9508ceaa227184b13dcd9f5defc5c55aa8a8e82bb4	0x495df9893d81568422cda452a3146099213ec0b6	0x75cda57917e9f73705dc8bcf8a6b2f99adbdc5a5	0	0x2e4dbe8f000000000000000000000000000000000000000000000000000000000000253f00000000000000000000000091eeda83433690056e22fe33f0e2ffc754ba107600000000000000000000000000000000000000000000000000000000043b9c46000000000000000000000000000000000000000000000000000000000000253f00000000000000000000000000000000000000000000000000000000000000a00000000000000000000000000000000000000000000000000000000000000041b9c21…	16113071	0x614ecb915ce83903f29979c30132a04dc5f21f951d8f66338f5bfeb03c2429a3
204	0xfd0788dd7fe222fc6d10e99d3cb5c783c834dcd0fc5979037f3904608adac442	0xb0863870f544bde34a310d12a258aa41da52a5aa	0x3bb5a0e451f6689d4a917fa17ea4bfbca298ae91	0	0x095ea7b300000000000000000000000068b3465833fb72a70ecdf485e0e4c7bd8665fc45ffffffffffffffffffffffffffffffffffffffffffffffffffffffffffffffff	16113071	0x614ecb915ce83903f29979c30132a04dc5f21f951d8f66338f5bfeb03c2429a3
206	0xb41d22547f4b34ea8e4acb3c0d41105c57ae5c6d0a722f5163de177c5ac6aac7	0x6dfc34609a05bc22319fa4cce1d1e2929548c0d7	0xb46adb8279079bc86a2d53bbd6185ff1030e8211	1.79e+17	0x	16113071	0x614ecb915ce83903f29979c30132a04dc5f21f951d8f66338f5bfeb03c2429a3
209	0x99ed84520e75e517ea6f64b5f7725960af2756ba785bfa413ebe3b004ca25c9f	0x4976a4a02f38326660d17bf34b431dc6e2eb2327	0x5f0887fbd0abf599f5bb2d46e3a11f58cb879ee0	4.92e+16	0x	16113071	0x614ecb915ce83903f29979c30132a04dc5f21f951d8f66338f5bfeb03c2429a3
210	0x2b97699d85b285661d9483598dd0d5d424169253396a47374414f5ed8aa7bf14	0x013e170a3a69867c35e54daa137080fefcdedc68	0x4fa72dd7ec160a4f2d9683216e6ae71a6a15427a	0	0x0442275c0000000000000000000000007db5af2b9624e1b3b4bb69d6debd9ad1016a58ac000000000000000000000000c02aaa39b223fe8d0a0e5c4f27ead9083c756cc200000000000000000000000000000000000000000000000003952dbd32493940000000000000000000000000013e170a3a69867c35e54daa137080fefcdedc68	16113071	0x614ecb915ce83903f29979c30132a04dc5f21f951d8f66338f5bfeb03c2429a3
212	0x8f4b4d569d070d10addbd58487e4cb3e633bfa9d880c33787b9229ffd9d7da4f	0xf7858da8a6617f7c6d0ff2bcafdb6d2eedf64840	0x7527f77ac81d229b923e6f148be8d626699cab28	1.76e+16	0x	16113071	0x614ecb915ce83903f29979c30132a04dc5f21f951d8f66338f5bfeb03c2429a3
213	0xf08e99d1541a282f7f4cf946c866b50913880ee4824d93472a7eeca7e43accff	0xc41e0653905b8e0475b5f95f55c2ff03d6b4a75b	0x00000000007079010d6e70a9b6e6d70a43f58300	0	0x0010d6db8c60b5523f098bbd6bdbc9bbdf3abb0f620027101e0b2992079b620aa13a7c2e7c88d2e1e18e46e900000000000015be873443000000000000000000002c1d9d1ae0de80aa1bbd1db30b	16113071	0x614ecb915ce83903f29979c30132a04dc5f21f951d8f66338f5bfeb03c2429a3
214	0x6cf9f6e36189b4160735bd322b647c42f292eb94e8329f360ae5b8e178078073	0xef3baf2ad803a5d9b1a4b4a719b7b2e1c1e2e2b9	0x68b3465833fb72a70ecdf485e0e4c7bd8665fc45	2.5e+17	0x5ae401dc00000000000000000000000000000000000000000000000000000000638cdfd700000000000000000000000000000000000000000000000000000000000000400000000000000000000000000000000000000000000000000000000000000001000000000000000000000000000000000000000000000000000000000000002000000000000000000000000000000000000000000000000000000000000000e4472b43f300000000000000000000000000000000000000000000000003782dace9d90…	16113071	0x614ecb915ce83903f29979c30132a04dc5f21f951d8f66338f5bfeb03c2429a3
215	0x06f9f7f30368c23921970ad0d938f420b2042f9f7bd0faca3c0a04696a5d7e61	0x151b381058f91cf871e7ea1ee83c45326f61e96d	0x5e48fa942011fc941fe2639c8526d90d23daabf9	1.3e+17	0x	16113071	0x614ecb915ce83903f29979c30132a04dc5f21f951d8f66338f5bfeb03c2429a3
216	0x057eed4c96b7bdd3bc2925b256eb7d5c29fae45e3b28e170287da8e9ba571d3a	0x18ab6fac9bff025d02392b95599dc4ac3746ede7	0x1111111254eeb25477b68fb85ed929f73a960582	0	0x12aa3caf00000000000000000000000053222470cdcfb8081c0e3a50fd106f0d69e63f2000000000000000000000000037cd4e8875e3edaffdfe9be63958f07effbd0bfd000000000000000000000000eeeeeeeeeeeeeeeeeeeeeeeeeeeeeeeeeeeeeeee0000000000000000000000008d6f94407a05e8bd68539574f3fc3c279674291900000000000000000000000018ab6fac9bff025d02392b95599dc4ac3746ede7000000000000000000000000000000000000000000005c16080f98402ccbad1200000…	16113071	0x614ecb915ce83903f29979c30132a04dc5f21f951d8f66338f5bfeb03c2429a3
217	0x7ee3524b0ee877f0a65ac4734f79131d375364054fcb6b5e8b9c155db6e17c57	0xd83bfbb63e96e1ede700000fe01e7848710d3f84	0xd4e431db86c843f21c3bfd2fcb8e97f10461fc42	0	0x4e71d92d	16113071	0x614ecb915ce83903f29979c30132a04dc5f21f951d8f66338f5bfeb03c2429a3
220	0x95ae4298d04e457836ad6c7d4bda6e6ff7e928964fc6a2bd748c28f47b9af545	0xe93685f3bba03016f02bd1828badd6195988d950	0x902f09715b6303d4173037652fa7377e5b98089e	1570000000000000	0x0508941e000000000000000000000000000000000000000000000000000000000000006e000000000000000000000000af5191b0de278c7286d6c7cc6ab6bb8a73ba2cd60000000000000000000000000000000000000000000000000000000000014c08c59815a1f0fbec4bf2c2d63aaec05a630d9b147bb7e96af24e7b066db9f92e486798ba1b1aae7584f53916a1926177a694d53d9f6ac039122fc00d1e28889ce300000000000000000000000000000000000000000000000000000000000000e000000…	16113071	0x614ecb915ce83903f29979c30132a04dc5f21f951d8f66338f5bfeb03c2429a3
221	0x28c38401c4f41a5acc3a2bab095fcd4938bd1f1d2aa2ebf04592eeff2de3dac5	0x21a31ee1afc51d94c2efccaa2092ad1028285549	0x514910771af9ca656af840dff83e8264ecf986ca	0	0xa9059cbb000000000000000000000000629d90379a0515349602a4b1f8bb159a0d2b9d40000000000000000000000000000000000000000000000002efd91778cb097000	16113071	0x614ecb915ce83903f29979c30132a04dc5f21f951d8f66338f5bfeb03c2429a3
222	0x5d4d2caa90c92eb1a5bc5923846872c87ed30355341ea92a9fc155a4b09f182e	0x7830c87c02e56aff27fa8ab1241711331fa86f43	0xa9d1e08c7793af67e9d92fe308d5697fb81d3e43	0	0x1a1da075000000000000000000000000000000000000000000000000000000000000004000000000000000000000000000000000000000000000000000000000000156940000000000000000000000000000000000000000000000000000000000000009000000000000000000000000fbcae7151dbb9d95b23fd8da880b2c4557d7f4620000000000000000000000000000000000000000000000000000a3bca1882d670000000000000000000000001c9dfd4b562b8bb92feee9d314cae8b2f9ec1afb00000…	16113071	0x614ecb915ce83903f29979c30132a04dc5f21f951d8f66338f5bfeb03c2429a3
223	0x641fd2b032a056b89f53257492463ff605edc54e87a7a56b2010fa356837acca	0xd6584a730658cc5816d8dbdf7872ef4847aff9f2	0x6b175474e89094c44da98b954eedeac495271d0f	0	0xa9059cbb0000000000000000000000006fa3860b982813d10c6d83a594e6dca812b42a0d0000000000000000000000000000000000000000000000d8d726b7177a800000	16113071	0x614ecb915ce83903f29979c30132a04dc5f21f951d8f66338f5bfeb03c2429a3
224	0x9bf7961714700180eff236fa3b900a2ea5038a8fd24006d3661eb9adb184473c	0xa19581813bbb05fc874027993f732b66aa088421	0x33e585dc5335131b9818c652b319a2258c2f47d1	0	0x3d18b912	16113071	0x614ecb915ce83903f29979c30132a04dc5f21f951d8f66338f5bfeb03c2429a3
225	0x7be4ad3f07a0cbc1c485ee50275f8984478248d7a5b58774942900b62149de78	0x8ca4cb4b261d4e26fafd4bd40427a2b2dc93413c	0x75cda57917e9f73705dc8bcf8a6b2f99adbdc5a5	0	0x2e4dbe8f000000000000000000000000000000000000000000000000000000000000253f00000000000000000000000091eeda83433690056e22fe33f0e2ffc754ba107600000000000000000000000000000000000000000000000000000000043b963e000000000000000000000000000000000000000000000000000000000000253f00000000000000000000000000000000000000000000000000000000000000a00000000000000000000000000000000000000000000000000000000000000041afdd8…	16113071	0x614ecb915ce83903f29979c30132a04dc5f21f951d8f66338f5bfeb03c2429a3
226	0x40a7462fe1fcb657886f310e9823b6ac35b821decfa948c63aee7b61ad26381d	0x7d2cfb6032fc8b73aac9c3c24a0a39d685023afa	0xc6dca8e9c9eb5a7eb68b04a69e63352d5d98695c	0	0xa22cb4650000000000000000000000001e0049783f008a0085193e00003d00cd54003c710000000000000000000000000000000000000000000000000000000000000001	16113071	0x614ecb915ce83903f29979c30132a04dc5f21f951d8f66338f5bfeb03c2429a3
227	0x486578d51473c8ebd4e2077c533c8fd36f410f435d821464850beba15123ac3a	0x87d63b96ca7695775fdde18ade27480143f9dfa0	0xeeeec6476073778077b40a73fe32e23a9876cab4	7.94e+16	0x2b66d72e000000000000000000000000000000000000000000000000000000000000002000000000000000000000000000000000000000000000000000000000000000ea65794a68624763694f694a46557a49314e694973496d74705a434936496a64684e6a526c5a6d51314c544a694e4463744e475a6a5a6931684f4463784c5445785a6d59354f5451345954646a4f434a392e436751784d6a553545674e56553051614a446c6a5a6a6c6c4e5456684c544178595759744e4751314d5330344d4449304c5…	16113071	0x614ecb915ce83903f29979c30132a04dc5f21f951d8f66338f5bfeb03c2429a3
228	0x723667420d2a71bc317b4132b3306d060139f813885b8259c720e28342b1d997	0x99a08ab9d525687adeba17154713db4af5964d96	0x483b2026791115a80af3e28a0826cfae90d09ae0	1.24e+18	0x	16113071	0x614ecb915ce83903f29979c30132a04dc5f21f951d8f66338f5bfeb03c2429a3
229	0x8127a13ae86adcb89f51a63268064610528d282f95029de6620bf386ed62e24e	0x3aff86656a65f3d81b3e0b4c4f8d4199f3b3fbde	0x18aaa7115705e8be94bffebde57af9bfc265b998	0	0xa9059cbb0000000000000000000000008c54ebdd960056d2cff5998df5695daca1fc0190000000000000000000000000000000000000000000000a3cf348f15149f00000	16113071	0x614ecb915ce83903f29979c30132a04dc5f21f951d8f66338f5bfeb03c2429a3
230	0x2f2b75b8c4f09ccf0a85b803e0fa97b8767e8ff96482949ddd94d16eabc3f276	0xaa7251508e3478e16e198aab57a22060bd3796df	0x283af0b28c62c092c9727f1ee09c02ca627eb7f5	4370000000000000	0xf7a1696300000000000000000000000000000000000000000000000000000000000000c0000000000000000000000000aa7251508e3478e16e198aab57a22060bd3796df0000000000000000000000000000000000000000000000000000000001e185582d5bb992cfdda2f81214167ebb97d9da86d438481c40d55aefa52414afaceeef0000000000000000000000004976fb03c32e5b8cfe2b6ccb31c09ba78ebaba41000000000000000000000000aa7251508e3478e16e198aab57a22060bd3796df00000…	16113071	0x614ecb915ce83903f29979c30132a04dc5f21f951d8f66338f5bfeb03c2429a3
231	0x7086d5faaba91bc119052566994932ce31d3c54109ef6d67a12395f94b02c1ed	0x8c54ebdd960056d2cff5998df5695daca1fc0190	0xac38f405c63c6829fc985d5910274f891327d34a	1850000000000000	0x	16113071	0x614ecb915ce83903f29979c30132a04dc5f21f951d8f66338f5bfeb03c2429a3
232	0xe30584e0d32702eb2d61097a676b1ed2d6050575b323c799946d9a783411fef0	0x65e2bd189db4f46d71afd401a9b88d662b361d87	0xabea9132b05a70803a4e85094fd0e1800777fbef	3150000000000000	0x2d2da80600000000000000000000000065e2bd189db4f46d71afd401a9b88d662b361d87	16113071	0x614ecb915ce83903f29979c30132a04dc5f21f951d8f66338f5bfeb03c2429a3
233	0xaf5a66adaa2f40d4a58a2033085a1c95dc853693f7ebe27c8cf8b1b5da7531f2	0xff245636b1cc4a12fa77b4ca8e6438f87d3b793d	0x6b175474e89094c44da98b954eedeac495271d0f	0	0x095ea7b300000000000000000000000076f4eed9fe41262669d0250b2a97db79712ad855ffffffffffffffffffffffffffffffffffffffffffffffffffffffffffffffff	16113071	0x614ecb915ce83903f29979c30132a04dc5f21f951d8f66338f5bfeb03c2429a3
234	0x9fb2e1f2596b917d53bf2ca6b007a764aa9a5de70ac49e5f549688cd2d1f78a6	0xd527c5a510eb62f2598e8a9e81b976c94b30866d	0x7492e30d60d96c58ed0f0dc2fe536098c620c4c0	0	0xefef39a10000000000000000000000000000000000000000000000000000000000000001	16113071	0x614ecb915ce83903f29979c30132a04dc5f21f951d8f66338f5bfeb03c2429a3
235	0x647f919912da0f14318c9d6ef5b7a33c867e7af3cb41b49e4d315d4ef497f3dd	0x11b7e01c575e0be5334b2aa491c5600fc8e2da50	0xcd041f40d497038e2da65988b7d7e2c0d9244619	0	0xa22cb46500000000000000000000000020f780a973856b93f63670377900c1d2a50a77c40000000000000000000000000000000000000000000000000000000000000000	16113071	0x614ecb915ce83903f29979c30132a04dc5f21f951d8f66338f5bfeb03c2429a3
237	0xc32b6ad6b104f145a9437bf61d9188888620c4c436ef0094cd807a39931d2b4c	0x9249608b274231f1d66c17bc3ecc531dfc39b2a3	0x45ebb5fe718f40052fb2dc2463c13717b7b72768	0	0x23b872dd0000000000000000000000009249608b274231f1d66c17bc3ecc531dfc39b2a30000000000000000000000007e4d092e6e84d52dd6fdb9eba433ff9854e8bc3f0000000000000000000000000000000000000000000000000000000000000c4d	16113071	0x614ecb915ce83903f29979c30132a04dc5f21f951d8f66338f5bfeb03c2429a3
238	0x7f7142f47e46cda4910d71486e7da00453a3807f8b00bb9bfc6bcca3570827e9	0x1be210e7990eff6c07cb8cadcb9d077063ac3614	0xc1edd55353e0befafe13b2bfa5ae739533fadeb8	2100000000000000	0x	16113071	0x614ecb915ce83903f29979c30132a04dc5f21f951d8f66338f5bfeb03c2429a3
239	0xa774e6d821945604e3ebfad793fa033e595bc63cbf9cf732c8a6db5a34dbc848	0xa2e1aa5f8f9f04718a910404efef3d68399efa4d	0xdac17f958d2ee523a2206206994597c13d831ec7	0	0xa9059cbb000000000000000000000000a54ac807ea6a11cfc698048cd5a4fa96d97f5dda0000000000000000000000000000000000000000000000000000000fb0b28940	16113071	0x614ecb915ce83903f29979c30132a04dc5f21f951d8f66338f5bfeb03c2429a3
240	0x1f3a86a619e8d0a3e39aae25ec3deca62a07029c17758a1abc30731d9b7a8047	0xa9831d89c4067bf7518efbcb6351ef6dd0059f33	0xdac17f958d2ee523a2206206994597c13d831ec7	0	0x23b872dd000000000000000000000000e1266a1c36e39ea33802ef3f64d6504f3c8d66eb000000000000000000000000ff62a9d9be13305521c9cd622ae0cfd4aa35a73c0000000000000000000000000000000000000000000000000000000000000000	16113071	0x614ecb915ce83903f29979c30132a04dc5f21f951d8f66338f5bfeb03c2429a3
243	0xf19e1289346a23d2f5966f2dc7bc130ec26a90c22bcde2e9fd8033dc185e05e6	0x21a31ee1afc51d94c2efccaa2092ad1028285549	0x18aaa7115705e8be94bffebde57af9bfc265b998	0	0xa9059cbb000000000000000000000000ba009ea29ffe0e690e8688cbfc24207186c68e13000000000000000000000000000000000000000000000c8e120396f53447c000	16113071	0x614ecb915ce83903f29979c30132a04dc5f21f951d8f66338f5bfeb03c2429a3
244	0x0648defd33cecc59377f6d3b94c5ffcb0e25c644eb40d21fd09e18515f389062	0x4687f6b19b5ceea0cd50eca6711127b23602deac	0xeeeec6476073778077b40a73fe32e23a9876cab4	7.94e+16	0x2b66d72e000000000000000000000000000000000000000000000000000000000000002000000000000000000000000000000000000000000000000000000000000000ea65794a68624763694f694a46557a49314e694973496d74705a434936496a64684e6a526c5a6d51314c544a694e4463744e475a6a5a6931684f4463784c5445785a6d59354f5451345954646a4f434a392e436751784d6a553545674e56553051614a4749784e32566b4f5455304c546c695a5455744e4463355a693035596a49354c5…	16113071	0x614ecb915ce83903f29979c30132a04dc5f21f951d8f66338f5bfeb03c2429a3
246	0x7e2b81d74c29b2a1db21e3de2233f6bd2154d7d2f344a6454a8aaab415ded411	0x1be210e7990eff6c07cb8cadcb9d077063ac3614	0x368975d6748bc329ccb52b2d42bcce5d8e0431ef	2100000000000000	0x	16113071	0x614ecb915ce83903f29979c30132a04dc5f21f951d8f66338f5bfeb03c2429a3
247	0xe5ad001e22a90f963080ae2f73dc0e185386fea8c5c36d258d6363f588f4a6b2	0xad003006ceb0934012c289d1cfdb1db915998f74	0xa0b86991c6218b36c1d19d4a2e9eb0ce3606eb48	0	0xa9059cbb0000000000000000000000005ec1af1f90382472bdd64ce6dc3f77dae21931260000000000000000000000000000000000000000000000000000000005daed64	16113071	0x614ecb915ce83903f29979c30132a04dc5f21f951d8f66338f5bfeb03c2429a3
248	0x7085cb1a6121ffd64d7cc6ec872caac1d224d8271b54ffba35d6ac61114dc33b	0x2d6ee5c8a3b2370cbc0de309bf5d1a4aa09c3918	0x69af81e73a73b40adf4f3d4223cd9b1ece623074	0	0xa9059cbb0000000000000000000000008c54ebdd960056d2cff5998df5695daca1fc019000000000000000000000000000000000000000000000016ae4d36f8e2bad0000	16113071	0x614ecb915ce83903f29979c30132a04dc5f21f951d8f66338f5bfeb03c2429a3
249	0xcded1f877f0fc49a986b2482f9f6fa369c1e2bd058a3488a1e972b140fc79d4e	0x1be210e7990eff6c07cb8cadcb9d077063ac3614	0xb67555d23b33ebd39442395e51d3101f9ccb9b29	2100000000000000	0x	16113071	0x614ecb915ce83903f29979c30132a04dc5f21f951d8f66338f5bfeb03c2429a3
250	0xa7ddb9e13499eae6b6bad9e82ce24c31a27ad92bd9ee59188aab46692c5e4be7	0x537b55f5ecedc8cc9a07e76fb9695ecbb5d35ea5	0xa0b86991c6218b36c1d19d4a2e9eb0ce3606eb48	0	0xa9059cbb000000000000000000000000c0c911c40c59a725c1db226451d8e1f2f33e450f00000000000000000000000000000000000000000000000000000000389fd980	16113071	0x614ecb915ce83903f29979c30132a04dc5f21f951d8f66338f5bfeb03c2429a3
251	0xe47c23beccebe9b0c0f44f43b06f4a995eb2887e72fdbab0a604ada013aa2faf	0xcfc0f98f30742b6d880f90155d4ebb885e55ab33	0xf0ed2f84fc4608a9ecf2e8b4001d44196e8bcd23	8.93e+16	0x	16113071	0x614ecb915ce83903f29979c30132a04dc5f21f951d8f66338f5bfeb03c2429a3
254	0xbb8668489bc7265b23c6f84488d3c8fe12fa5acc98a040a5ed19534f55938225	0x56eddb7aa87536c09ccc2793473599fd21a8b17f	0x6b34cf3bfe4a950172e6f31eb9625ef9b9e947a8	9230000000000000	0x	16113071	0x614ecb915ce83903f29979c30132a04dc5f21f951d8f66338f5bfeb03c2429a3
257	0xfc571884606e92eb86038602b5942ad2e54f6d4ee5e0ec548e1deadf02354ca8	0x71660c4005ba85c37ccec55d0c4493e66fe775d3	0x2e19690cf0a4aafdad668a32dd92f935bc06a0e5	8.26e+16	0x	16113071	0x614ecb915ce83903f29979c30132a04dc5f21f951d8f66338f5bfeb03c2429a3
258	0xcb7322292e1e65fb791cf6061160bd5c47adede87c247e83afccee786080ac46	0xc35fb86f962ea955751a793a007b5cdd44f798d7	0xf7f9bf6974f872b1671ac9196c0481058c31d201	3.65e+16	0x	16113071	0x614ecb915ce83903f29979c30132a04dc5f21f951d8f66338f5bfeb03c2429a3
260	0xc0b32523db9c67f091d0778f1dfa9b78009c8f00be812597666eff7f8f365326	0x46ef6848987ca9b687b720e9bd1fb670a1d19e5b	0x41315c3af33657a94de841e51d3ab602041d0fdf	0	0xa22cb4650000000000000000000000001e0049783f008a0085193e00003d00cd54003c710000000000000000000000000000000000000000000000000000000000000001	16113071	0x614ecb915ce83903f29979c30132a04dc5f21f951d8f66338f5bfeb03c2429a3
261	0x3064b4ec8fa9d9a8d132dd0fde56b8a54501735ab67a409a855581e97eb60af8	0xd24400ae8bfebb18ca49be86258a3c749cf46853	0x5f65f7b609678448494de4c87521cdf6cef1e932	0	0xfa558b710000000000000000000000007d1afa7b718fb893db30a3abc0cfc608aacfebb0000000000000000000000000000000000000000000000000000000000000006000000000000000000000000000000000000000000000000000000000000000a0000000000000000000000000000000000000000000000000000000000000000100000000000000000000000087bcdf530b666a416e0dd1c9d01736f36bc4d6e2000000000000000000000000000000000000000000000000000000000000000100000…	16113071	0x614ecb915ce83903f29979c30132a04dc5f21f951d8f66338f5bfeb03c2429a3
262	0x23cfe579ccb54056511fc196a32db7a2fd621c3749911a6736c66a1e66dd124c	0x914ec51e16483c6a0f6ffb8fc3da35cea241cacc	0x7a250d5630b4cf539739df2c5dacb4c659f2488d	2e+16	0x7ff36ab500000000000000000000000000000000000000000000000000018d7149d013fb0000000000000000000000000000000000000000000000000000000000000080000000000000000000000000914ec51e16483c6a0f6ffb8fc3da35cea241cacc00000000000000000000000000000000000000000000000000000000638cdfb10000000000000000000000000000000000000000000000000000000000000002000000000000000000000000c02aaa39b223fe8d0a0e5c4f27ead9083c756cc200000…	16113071	0x614ecb915ce83903f29979c30132a04dc5f21f951d8f66338f5bfeb03c2429a3
264	0xd4cfc4c195dd15ed7155a44c89bb832d6239e146e63a037e68d239eb9d4d8006	0xeb2629a2734e272bcc07bda959863f316f4bd4cf	0xebd93aa217de6844aa4a9681d7d5d19d4f8c0ada	4160000000000000	0x	16113071	0x614ecb915ce83903f29979c30132a04dc5f21f951d8f66338f5bfeb03c2429a3
266	0x232c5cea76201004fa126c6b3d556165845f12c46904b11ffd485ad89ba94f34	0x75e89d5979e4f6fba9f97c104c2f0afb3f1dcb88	0x761d38e5ddf6ccf6cf7c55759d5210750b5d60f3	0	0xa9059cbb000000000000000000000000839d4641f97153b0ff26ab837860c479e2bd0242000000000000000000000000000000000000000014452270f3426d6e8d0792ea	16113071	0x614ecb915ce83903f29979c30132a04dc5f21f951d8f66338f5bfeb03c2429a3
268	0x70e4e68cd6f9a67109c81d329270c9c7b4aea8409b615302c071ecef4b05d2b5	0x23f4569002a5a07f0ecf688142eeb6bcd883eef8	0x415434e1fb36a9c55ddca96cc3f530f0c1cfe371	2.35e+17	0x	16113071	0x614ecb915ce83903f29979c30132a04dc5f21f951d8f66338f5bfeb03c2429a3
270	0x82af6b5762889e71a2824894f21823af70bc7fdfb1e49afaa3228bd026df12ba	0x935f64b44b5c48a1539c4ada5161d27ace4205b5	0xc2d7461c92461f58c7bc1560d2dac9053479c1bb	3.3e+16	0x	16113071	0x614ecb915ce83903f29979c30132a04dc5f21f951d8f66338f5bfeb03c2429a3
271	0xc84c2aa0d28611ec39bb28875af3df68e3be1b3852dcf61f5c85e089bb34bd03	0x95f7e46689d6ebbd71844bb6d2318d5dc11c88cc	0xf5a7e68beb84d8c54f449e01242cdeb7e2482066	0	0x	16113071	0x614ecb915ce83903f29979c30132a04dc5f21f951d8f66338f5bfeb03c2429a3
272	0x6428723c19714421ad3381fabb215bef72cf50bbeb1aaf9e1d05e1fc44e8b330	0x7e4d092e6e84d52dd6fdb9eba433ff9854e8bc3f	0x9249608b274231f1d66c17bc3ecc531dfc39b2a3	7490000000000000	0x	16113071	0x614ecb915ce83903f29979c30132a04dc5f21f951d8f66338f5bfeb03c2429a3
274	0xf632c0c734f59f573d046428eb62e3f5f8c0a86bb1f64421f998c00bf7391e0a	0x74bcdd2f3a6a91bd34fe6749b8b522f9ecde2e3a	0x76f4eed9fe41262669d0250b2a97db79712ad855	0	0xf17a454600000000000000000000000000000000000000000000000000000000000000c000000000000000000000000000000000000000000000000000000000000001a000000000000000000000000000000000000000000000021e19e0c9bab2d8968000000000000000000000000000000000000000000000021c798b60ad152021500000000000000000000000001d64fb0ffa8362b2e1ee7ee03929159551eab26e000000000000000000000000000000000000000000000000000000000000022000000…	16113071	0x614ecb915ce83903f29979c30132a04dc5f21f951d8f66338f5bfeb03c2429a3
275	0xbcbea6115829c651fcbf81b422d008e38076e67e3a13cb133212f1c77f8ed17c	0x6dfc34609a05bc22319fa4cce1d1e2929548c0d7	0xd109205ed508f921d619bb1dafdfcd4c252752ce	3.97e+17	0x	16113071	0x614ecb915ce83903f29979c30132a04dc5f21f951d8f66338f5bfeb03c2429a3
277	0xe010286278c6186a38b4fa704f1c9430ee90119c0be56c443474cb19199b8a21	0x87704a8cecbbf36f3d2f785ef953ed9affc82b65	0xba12222222228d8ba445958a75a0704d566bf2c8	0	0x52bbbe2900000000000000000000000000000000000000000000000000000000000000e000000000000000000000000087704a8cecbbf36f3d2f785ef953ed9affc82b65000000000000000000000000000000000000000000000000000000000000000000000000000000000000000087704a8cecbbf36f3d2f785ef953ed9affc82b650000000000000000000000000000000000000000000000000000000000000000000000000000000000000000000000000000000000000000006fa5a2ec6436cf00000…	16113071	0x614ecb915ce83903f29979c30132a04dc5f21f951d8f66338f5bfeb03c2429a3
281	0x117471bf7152d6083806e741d34e881a5200fb73ffd837c3bbff034a8ce7b9e4	0xdafea492d9c6733ae3d56b7ed1adb60692c98bc5	0xcbafbd3711a69d439b6e6522da15b5cdd7e22951	2.17e+17	0x	16113071	0x614ecb915ce83903f29979c30132a04dc5f21f951d8f66338f5bfeb03c2429a3
282	0xdbbe89ad196bbd7ad238d77181c02a88949a2d5eeff360bd8b79e8b3c471d44c	0xa60efe89e07cfcf83eb30f3b063834f0f8b30466	0x6bcd6523152305cf5042b8c0390d3a2a8549871c	7.86e+16	0x	16113071	0x614ecb915ce83903f29979c30132a04dc5f21f951d8f66338f5bfeb03c2429a3
284	0x459221b74c434a6d2f4e80448bd4939cc131bce2c44e952661453f5b06cbbcca	0xbc761ee2bb6ea585d2c400751b1670d46b4a3417	0xa0b86991c6218b36c1d19d4a2e9eb0ce3606eb48	0	0xa9059cbb0000000000000000000000000966d29630207c473d9a56392fb2d96920937d52000000000000000000000000000000000000000000000000000000000230edf7	16113071	0x614ecb915ce83903f29979c30132a04dc5f21f951d8f66338f5bfeb03c2429a3
285	0x07d195cace6e34668c5080a5bdf6a93181d078499ba660bce39c7b8d48472605	0x4c53a541ea3a9226431bffd7d3865743b647ea56	0xe66b31678d6c16e9ebf358268a790b763c133750	7.94e+16	0x5cf5402600000000000000000000000000000000000000000000000000000000000000c0000000000000000000000000eeeeeeeeeeeeeeeeeeeeeeeeeeeeeeeeeeeeeeee000000000000000000000000eeeeeeeeeeeeeeeeeeeeeeeeeeeeeeeeeeeeeeee0000000000000000000000000000000000000000000000000117367385603f160000000000000000000000003819f64f282bf135d62168c1e513280daf905e060000000000000000000000000000000000000000000000000002d2012ab8917200000…	16113071	0x614ecb915ce83903f29979c30132a04dc5f21f951d8f66338f5bfeb03c2429a3
288	0xb7b587754dc7b68e8e375ccdabe943afa88b8f348450d235e96ae5916a5b1f4d	0x1be210e7990eff6c07cb8cadcb9d077063ac3614	0x68d7b624d736d6f7e4c8022a41474f81b61f02c1	2100000000000000	0x	16113071	0x614ecb915ce83903f29979c30132a04dc5f21f951d8f66338f5bfeb03c2429a3
289	0xbbda0ecec6db97379908fcfeafe7527653f9ffb2bb3bed2ddef1e73c6044f7a2	0x9696f59e4d72e237be84ffd425dcad154bf96976	0xf958521c3d0bebb6a421b104f179cfb83eae890e	1.02e+17	0x	16113071	0x614ecb915ce83903f29979c30132a04dc5f21f951d8f66338f5bfeb03c2429a3
290	0x62a1e78c75655e7da2225f84dfb5c1c465e4ca8b661b606ef8c80fc4067eddd3	0x8921e4e7d8438f86552e6e716b05e7ee289dd8e0	0xeeeec6476073778077b40a73fe32e23a9876cab4	7.94e+16	0x2b66d72e000000000000000000000000000000000000000000000000000000000000002000000000000000000000000000000000000000000000000000000000000000ea65794a68624763694f694a46557a49314e694973496d74705a434936496a64684e6a526c5a6d51314c544a694e4463744e475a6a5a6931684f4463784c5445785a6d59354f5451345954646a4f434a392e436751784d6a553545674e56553051614a474d315a444134596d56684c5745315a4459744e445a6d4e4330354e545a6d4c5…	16113071	0x614ecb915ce83903f29979c30132a04dc5f21f951d8f66338f5bfeb03c2429a3
291	0xba5b40c3afe5a26ab1838e1bcfccb8bf58c5374c14fac7d0db844a9e1221b4f9	0x0b5c4a7fcda49e0a8661419bb55b86161a86db2a	0xdac17f958d2ee523a2206206994597c13d831ec7	0	0xa9059cbb0000000000000000000000003f22ec32a71b45f8abc7c2f97cd31d28f5751110000000000000000000000000000000000000000000000000000000000382be20	16113071	0x614ecb915ce83903f29979c30132a04dc5f21f951d8f66338f5bfeb03c2429a3
292	0xa2abe687add49fe7cc31fa0fc8f8dcaa7abb47adf6402687cd8ecd58f359adae	0x4c6007e38ce164ed80ff8ff94192225fcdac68cd	0x1f9840a85d5af5bf1d1762f925bdaddc4201f984	0	0xa9059cbb000000000000000000000000c78ebbacd6ea3810f1f507f5ab9ff1d9beac873700000000000000000000000000000000000000000000000032afca11a7d88000	16113071	0x614ecb915ce83903f29979c30132a04dc5f21f951d8f66338f5bfeb03c2429a3
293	0x1e18fc5afb5557bac372effe7ba7242c8a17a0709921fc1aaea94e00c0e72115	0x6081258689a75d253d87ce902a8de3887239fe80	0xe54481d0d46058c4b6808d3d3c452c9bf1eab381	8e+16	0x	16113071	0x614ecb915ce83903f29979c30132a04dc5f21f951d8f66338f5bfeb03c2429a3
295	0x450c9fba5ec2cece9a9eebbc4b2bab8b5992659c96fc77982af79fd0f9867837	0xa9831d89c4067bf7518efbcb6351ef6dd0059f33	0xa0b86991c6218b36c1d19d4a2e9eb0ce3606eb48	0	0x23b872dd0000000000000000000000009cd7f56cd2850a3f31cdcf29c2e2782d3dcdcdcc000000000000000000000000d3ab9edc46c099685c8a04fd78cdc1e5c525dba50000000000000000000000000000000000000000000000000000000000000000	16113071	0x614ecb915ce83903f29979c30132a04dc5f21f951d8f66338f5bfeb03c2429a3
296	0xfc2342fc4c19ff016baea39ef6e78aa5a1cd05efed489183fe9f617b5ae0ab5d	0xb18ccf69940177f3ec62920ddb2a08ef7cb16e8f	0xd249942f6d417cbfdcb792b1229353b66c790726	0	0x75ddbe8b0000000000000000000000009def9511fec79f83afcbffe4776b1d817dc775ae000000000000000000000000a117000000f279d81a1d3cc75430faa017fa5a2e0000000000000000000000000000000000000000000000354ffe40fa054512f300000000000000000000000000000000000000000000000017a73c08d35750be	16113071	0x614ecb915ce83903f29979c30132a04dc5f21f951d8f66338f5bfeb03c2429a3
297	0xd9febbfa695de32bf27af6e93669436c96ca7421d69b1859c1fb5c3865a22410	0x53eb3ea47643e87e8f25dd997a37b3b5260e7336	0xdac17f958d2ee523a2206206994597c13d831ec7	0	0xa9059cbb000000000000000000000000f1b55ecf03553407774c387d021e8dcb426b53fd0000000000000000000000000000000000000000000000000000000005f5e100	16113071	0x614ecb915ce83903f29979c30132a04dc5f21f951d8f66338f5bfeb03c2429a3
298	0xa11b1ed98ece565521d8661ab48ee5f375fd00e6839621cfa39419a028d9e17e	0x9249608b274231f1d66c17bc3ecc531dfc39b2a3	0x45ebb5fe718f40052fb2dc2463c13717b7b72768	0	0x23b872dd0000000000000000000000009249608b274231f1d66c17bc3ecc531dfc39b2a30000000000000000000000007e4d092e6e84d52dd6fdb9eba433ff9854e8bc3f0000000000000000000000000000000000000000000000000000000000000bd8	16113071	0x614ecb915ce83903f29979c30132a04dc5f21f951d8f66338f5bfeb03c2429a3
299	0x76448af0d97a6b7927e396396436a7e718a6d4440827eb7e111b9a93301de8d7	0xd9dab6e0dd1f2c1463eb0f93f8563360316fa1c8	0x4976fb03c32e5b8cfe2b6ccb31c09ba78ebaba41	0	0x10f13a8c64fe350d3908344b9741baf85a2674cdf372ea80af6533fce3532b258d092929000000000000000000000000000000000000000000000000000000000000006000000000000000000000000000000000000000000000000000000000000000a00000000000000000000000000000000000000000000000000000000000000008736e617073686f74000000000000000000000000000000000000000000000000000000000000000000000000000000000000000000000000000000000000006169706…	16113071	0x614ecb915ce83903f29979c30132a04dc5f21f951d8f66338f5bfeb03c2429a3
300	0x320ee90cfec352c8c7fa0b4f95440aad7227abec3cdd1010cc7f2d2fbe852ef9	0xf7858da8a6617f7c6d0ff2bcafdb6d2eedf64840	0xd53af1a0915446d2fb185f05bc3289703bf49220	6.01e+16	0x	16113071	0x614ecb915ce83903f29979c30132a04dc5f21f951d8f66338f5bfeb03c2429a3
301	0xe1cbea225a8b11fd59127c7fb3e0d156f3500c148c28cbc184dbaeea19c37a3b	0xcfc5c04397832c5ffc9173cce4144f5ec9fac66d	0x0fb9deda6eebad64b6ec3934f6cbc3dcefe9fae3	1.5e+16	0x	16113071	0x614ecb915ce83903f29979c30132a04dc5f21f951d8f66338f5bfeb03c2429a3
302	0xa8b6ca8047a33db1d577ea09d289f8b088c8cd3e0e2311bb3c3bd941fe655ba5	0x0ac650f878cc45a23727fa13b67d019b37b379ba	0x2e973758d5f319ed4768570182ca601e970ff549	0	0x6ae0bc76931824104a7bdd4aeb0496a246d9218c35181373eac7ec9abb167054c551a7010000000000000000000000000000000000000000000000000000000000000000000000000000000000000000b5588c411ba0bb7d38865fdc51d082d004e519f72a29ece60000000000000000000000000000000000000000000000000000000000000000000000000000000000000000000000000000000000000000638ce05b00000000000000000000000000000000000000000000000000000000000000c000000…	16113071	0x614ecb915ce83903f29979c30132a04dc5f21f951d8f66338f5bfeb03c2429a3
303	0xb28bc63b51c32f57e4cee554a6acf09cb5f4a0f41711e2b149821e4ce32b4dc8	0xd222c0e025ba642f6dc58b670e4aaf375fe8d4e7	0xe36fd7cd5c67e0d7c3ce9a413a52b63592fd287a	0	0xa22cb4650000000000000000000000001e0049783f008a0085193e00003d00cd54003c710000000000000000000000000000000000000000000000000000000000000001	16113071	0x614ecb915ce83903f29979c30132a04dc5f21f951d8f66338f5bfeb03c2429a3
304	0x6e7911218a987c4be3ed03c2cf57ea381f7e5dafcbf0c201dbf261a58c5c24fc	0x8317faab7c2c3fa832dc47c62746af017ccffe21	0x5a888470fd088012031c95636e6780d85ca0e443	4000000000000000	0x	16113071	0x614ecb915ce83903f29979c30132a04dc5f21f951d8f66338f5bfeb03c2429a3
305	0x8f68fab022801b4d9c97ed77e10cf2a5bff9e3dd75d3f20011bdcdfefb371220	0xa9831d89c4067bf7518efbcb6351ef6dd0059f33	0xdac17f958d2ee523a2206206994597c13d831ec7	0	0x23b872dd0000000000000000000000006deff06108093a8ebe03c29924bc533ea138094e00000000000000000000000067364a512f9d9b9b5e4bde70a7b65f44993796f20000000000000000000000000000000000000000000000000000000000000000	16113071	0x614ecb915ce83903f29979c30132a04dc5f21f951d8f66338f5bfeb03c2429a3
307	0x2e164635e62e13a343ec62406dbbeb265dea39e9edd13b0f2944652fbd367845	0x911788d9b77f277e0394f0cf0cb5073985a372c0	0x9ade9ea6fd4fca08e27db8d2b607e3e30bcb0ab2	0	0x864e01810000000000000000000000000000000000000000000000000000000000000001	16113071	0x614ecb915ce83903f29979c30132a04dc5f21f951d8f66338f5bfeb03c2429a3
308	0xa42d81951a809190180d1dd966995a614e9b36b0848dac464f1c913a2dc4b6c8	0x22badc72011497ba95176ba35a563127cc788e73	0x68b3465833fb72a70ecdf485e0e4c7bd8665fc45	0	0x5ae401dc00000000000000000000000000000000000000000000000000000000638ce5fb0000000000000000000000000000000000000000000000000000000000000040000000000000000000000000000000000000000000000000000000000000000100000000000000000000000000000000000000000000000000000000000000200000000000000000000000000000000000000000000000000000000000000124b858183f0000000000000000000000000000000000000000000000000000000000000…	16113071	0x614ecb915ce83903f29979c30132a04dc5f21f951d8f66338f5bfeb03c2429a3
309	0x33ddd64c3fa4b5a0c22fbd9707facd71fd310ab0feab462d065d89fc115aa3ca	0xb9b5cd40fc69871eb579872b5e8065a29d2906da	0xba12222222228d8ba445958a75a0704d566bf2c8	22000000000000	0xb95cac28f4c0dd9b82da36c07605df83c8a416f11724d88b000200000000000000000026000000000000000000000000b9b5cd40fc69871eb579872b5e8065a29d2906da000000000000000000000000b9b5cd40fc69871eb579872b5e8065a29d2906da0000000000000000000000000000000000000000000000000000000000000080000000000000000000000000000000000000000000000000000000000000008000000000000000000000000000000000000000000000000000000000000000e000000…	16113071	0x614ecb915ce83903f29979c30132a04dc5f21f951d8f66338f5bfeb03c2429a3
311	0x07262f2b860418916994c106cedf7eec1afff83c974f2e9b8dfe9d49e1553dec	0x410ded847aa95d55b43c248c23e22810ba903450	0x5fb419cfdbbd00fd1dde1a22ffb8759306f8858c	4.54e+16	0x	16113071	0x614ecb915ce83903f29979c30132a04dc5f21f951d8f66338f5bfeb03c2429a3
313	0xbceedd445bb6663a7b121bf274e788fbba342ea9601c9d5f6c0f376b89fef7b0	0xa9831d89c4067bf7518efbcb6351ef6dd0059f33	0xdac17f958d2ee523a2206206994597c13d831ec7	0	0x23b872dd0000000000000000000000007bc8efe9a8c7ab364e7aa282b1f589c01f19da90000000000000000000000000aaabe7b994214979b2f493d1d7f54b14bd99ab910000000000000000000000000000000000000000000000000000000000000000	16113071	0x614ecb915ce83903f29979c30132a04dc5f21f951d8f66338f5bfeb03c2429a3
314	0xc8c12d2d39a094eb3dad121bbed8dd048eba78d1c7a1ff8e4f26955286dd682d	0x6dfc34609a05bc22319fa4cce1d1e2929548c0d7	0x87188c0d0a29b5e4cbcde4d8b9e85fc2f8284552	1.99e+18	0x	16113071	0x614ecb915ce83903f29979c30132a04dc5f21f951d8f66338f5bfeb03c2429a3
315	0x2c5a1f6f0f2d91e9bcddc45ac25cdcd62a7562bbb7435d5f17d8e1c1b07be274	0x77696bb39917c91a0c3908d577d5e322095425ca	0xa611c9707fb160b5059683c3c336edef66216250	3.96e+16	0x	16113071	0x614ecb915ce83903f29979c30132a04dc5f21f951d8f66338f5bfeb03c2429a3
316	0xe0fd271d321775e43b55a482c90437843ff4a61b1475ae32d0c41f7975009bea	0xc6f8859cf7e151b0ed8bf9ba9e916a10112277b0	0x8e8f404616c22d2a11ce61b9837e0cb53241fbcb	2000000000000000	0xa0712d680000000000000000000000000000000000000000000000000000000000000002	16113071	0x614ecb915ce83903f29979c30132a04dc5f21f951d8f66338f5bfeb03c2429a3
318	0x1edfdc7bb891a01bd0115ea4905dc39ebfa51730623275203abf910990e89474	0x864bca5332d5d37b26208e848f37b6cd06cdf666	0x73be082f945bd10ecb3b287bcd15fd3ded626342	7070000000000000	0x	16113071	0x614ecb915ce83903f29979c30132a04dc5f21f951d8f66338f5bfeb03c2429a3
320	0x0d342732d3195846053fe55b966c59b80219fcb6bbf35e9d45a423e7a8f00f2b	0x87985a87ab25f69772a451608168da51e27857db	0xd2b06302894fb1d0dbd4f6843917453628b97729	9.95e+17	0x	16113071	0x614ecb915ce83903f29979c30132a04dc5f21f951d8f66338f5bfeb03c2429a3
321	0x097ccf4ec45e67055de4be968a0062673ee5abe72cc3684755816c57e6379508	0x3cd751e6b0078be393132286c442345e5dc49699	0xc59be6bc70a06292330ae88288f7babd0809ab12	6.94e+16	0x	16113071	0x614ecb915ce83903f29979c30132a04dc5f21f951d8f66338f5bfeb03c2429a3
322	0x0f8e1ef4cb6e34c8b41e94c2180b96e42f25f9606258c6a3efdacbc5f98618f4	0x9249608b274231f1d66c17bc3ecc531dfc39b2a3	0x45ebb5fe718f40052fb2dc2463c13717b7b72768	0	0x23b872dd0000000000000000000000009249608b274231f1d66c17bc3ecc531dfc39b2a30000000000000000000000007e4d092e6e84d52dd6fdb9eba433ff9854e8bc3f0000000000000000000000000000000000000000000000000000000000000c4e	16113071	0x614ecb915ce83903f29979c30132a04dc5f21f951d8f66338f5bfeb03c2429a3
323	0x38bee52804c8f41693cfd98bd30e121ebe1a54e7e6b438b07608ce930cf687b7	0x8ca4cb4b261d4e26fafd4bd40427a2b2dc93413c	0x75cda57917e9f73705dc8bcf8a6b2f99adbdc5a5	0	0x2e4dbe8f000000000000000000000000000000000000000000000000000000000000254100000000000000000000000091eeda83433690056e22fe33f0e2ffc754ba107600000000000000000000000000000000000000000000000000000000043b966e000000000000000000000000000000000000000000000000000000000000254100000000000000000000000000000000000000000000000000000000000000a00000000000000000000000000000000000000000000000000000000000000041347de…	16113071	0x614ecb915ce83903f29979c30132a04dc5f21f951d8f66338f5bfeb03c2429a3
324	0x78466b069abab58a08701743f8afa18a07ff7784651a76f33f257990a6e10f2d	0x495df9893d81568422cda452a3146099213ec0b6	0x75cda57917e9f73705dc8bcf8a6b2f99adbdc5a5	0	0x2e4dbe8f000000000000000000000000000000000000000000000000000000000000254000000000000000000000000091eeda83433690056e22fe33f0e2ffc754ba107600000000000000000000000000000000000000000000000000000000043b9c58000000000000000000000000000000000000000000000000000000000000254000000000000000000000000000000000000000000000000000000000000000a00000000000000000000000000000000000000000000000000000000000000041f6343…	16113071	0x614ecb915ce83903f29979c30132a04dc5f21f951d8f66338f5bfeb03c2429a3
326	0xab0788463ed3571da454c4c160de454ab7de7d9c449f4e0ce7b937192d2626ca	0xd83bfbb63e96e1ede700000fe01e7848710d3f84	0xd4e431db86c843f21c3bfd2fcb8e97f10461fc42	0	0x4e71d92d	16113071	0x614ecb915ce83903f29979c30132a04dc5f21f951d8f66338f5bfeb03c2429a3
327	0xcdf3e1f73f231de655a7936100b40eded4fd7d0b00962b2bd2390b987786758b	0x1fd6bf77c9fc3946e1e059e84e59d0aaa1c16e53	0x83507cc8c8b67ed48badd1f59f684d5d02884c81	0	0x81e452350000000000000000000000001fd6bf77c9fc3946e1e059e84e59d0aaa1c16e530000000000000000000000000000000000000000000000080148340710ffd0b3000000000000000000000000000000000000000000000000000000000000000100000000000000000000000000000000000000000000000001536cefb54231ad	16113071	0x614ecb915ce83903f29979c30132a04dc5f21f951d8f66338f5bfeb03c2429a3
328	0xa45799919c56cf09873b15d7999600c586b900b2656c9caba2206a14e9e0e773	0xcdbadbc6f8b1a90565589c53324093cf504b9d35	0x0b5365167908035b63041da975bd21e2a881aec1	0	0x095ea7b300000000000000000000000068b3465833fb72a70ecdf485e0e4c7bd8665fc45ffffffffffffffffffffffffffffffffffffffffffffffffffffffffffffffff	16113071	0x614ecb915ce83903f29979c30132a04dc5f21f951d8f66338f5bfeb03c2429a3
329	0x66bb46d63c4af8f8509f5fef2ed28776d12c5411f3381f37c4f22833cf404146	0x1be210e7990eff6c07cb8cadcb9d077063ac3614	0xf3f8187e26df9470c60f156bc6d855ae8d8a063e	2100000000000000	0x	16113070	0xdeb648130ee9ce05c11c896f42e6ee2721b8de07bf4b26aee6f0b2c75ab7773e
330	0x0826870eec754403ecb8c024e0e6538e44c9ce8d6e5e211a709d4c81780aa553	0x331438345811dd4fcb75f307074efbcc9e4f378a	0xa965d6c7dcb2238b98389cb926cd6a984cf552d9	2.5e+18	0x	16113070	0xdeb648130ee9ce05c11c896f42e6ee2721b8de07bf4b26aee6f0b2c75ab7773e
332	0xe07f1b733d3dd06bf66ffd93e6ad660159c2d2024771921e71451ca4cc519a2d	0xd0cb71db38b54adbf8b3c7a00c47aaf3fbc527bc	0x4f9254c83eb525f9fcf346490bbb3ed28a81c667	0	0x095ea7b300000000000000000000000068b3465833fb72a70ecdf485e0e4c7bd8665fc45ffffffffffffffffffffffffffffffffffffffffffffffffffffffffffffffff	16113070	0xdeb648130ee9ce05c11c896f42e6ee2721b8de07bf4b26aee6f0b2c75ab7773e
334	0x4d27106c5ba9cf2cb1ef79183dae7a71c7d4355185bccc2859100c9930003c48	0x6887246668a3b87f54deb3b94ba47a6f63f32985	0x5e4e65926ba27467555eb562121fac00d24e9dd2	0	0xd0f893440002b47f070000890000060000000000000000000000000000000000000e00000000638cdf0f0000f5dd7800003400000000638cdf0f0000f5dd7900001c00000000638cdf1e0000f5dd7900002500000000638cdf1e0000f5dd7a00000600000000638cdf2d0000f5dd7a789cec7d793cd55db7f839c79c310a99a744e6f998324f91089190792c63a6cc43c81cc72cbe8a149239844491a964ca94390a652e73bfcfa5f7be3c97f34d9ee7ed797ef7aeffbe679dbdf7dad3da6badbdf65a1088d5b…
335	0xe6d81fd115a3d8ed40a31dba4b1b0e353d6a6ede3109fd679bc81ca80e9d11ee	0x3f2bf39c9d63b29912c44efc5cfff85cf4699665	0x76f4eed9fe41262669d0250b2a97db79712ad855	0	0xf17a454600000000000000000000000000000000000000000000000000000000000000c000000000000000000000000000000000000000000000000000000000000001a0000000000000000000000000000000000000000000000002629f66e0c52fd8f00000000000000000000000000000000000000000000000025c8435359003d9540000000000000000000000001d64fb0ffa8362b2e1ee7ee03929159551eab26e000000000000000000000000000000000000000000000000000000000000022000000…	16113070	0xdeb648130ee9ce05c11c896f42e6ee2721b8de07bf4b26aee6f0b2c75ab7773e
336	0x2f05a54203f0932f7fb30668cad773de5c117c6a0e3e7638cb169c579ba71c05	0xb13909fa9e3e2aaf91325b1b59e3b1c31c41b071	0x971ad91e5a4c7c7c27b8192fb939e00b2785d6cc	2.26e+16	0x	16113070	0xdeb648130ee9ce05c11c896f42e6ee2721b8de07bf4b26aee6f0b2c75ab7773e
337	0xc79b50a4057d179985a0f2e581ec31c98c3331de103fc95cd9a074e546eb7fec	0x4b0401fe6b84c52d4f4310c371c731a2b6d0964d	0x9d0e02743e277889d0c85f8712a4f68c0e17c12c	1250000000000000	0x	16113070	0xdeb648130ee9ce05c11c896f42e6ee2721b8de07bf4b26aee6f0b2c75ab7773e
338	0x892b72d776fa3320ab8123755deccfe6cb645d0446cefc74f260d13a23ad4f36	0x94d851dce74ba0f69996baa6cfadc649646cb4c2	0x47a49a7c9358804c53541714a16f960dc25aa5fd	7e+16	0x	16113070	0xdeb648130ee9ce05c11c896f42e6ee2721b8de07bf4b26aee6f0b2c75ab7773e
339	0x2e7f11ef28ee3192cbc75f07ec22e4e0e6841bae8a660420e02730efec55b4b8	0x1be210e7990eff6c07cb8cadcb9d077063ac3614	0xec7fd1f523e1def3b64a69994bf564423de549fa	2100000000000000	0x	16113070	0xdeb648130ee9ce05c11c896f42e6ee2721b8de07bf4b26aee6f0b2c75ab7773e
340	0x7c7abbb9210fad340a9eb6b0d4ee2cd1d7f4e905ff66df62a40cdf1839d74930	0x11b7e01c575e0be5334b2aa491c5600fc8e2da50	0xd4190dd1da460fc7bc41a792e688604778820ac9	0	0xa22cb4650000000000000000000000001e0049783f008a0085193e00003d00cd54003c710000000000000000000000000000000000000000000000000000000000000000	16113070	0xdeb648130ee9ce05c11c896f42e6ee2721b8de07bf4b26aee6f0b2c75ab7773e
341	0x6128d0d2c77426bc8734d68c28f040d071c2ee1f3cd921d2b6b65d3050f39015	0x03a22c370d770683afcf006244c06b956bdf53c4	0x0000000000c04ecfab591e5e517551288afebbfe	114000000000	0xc050282f50e0c03a7a0d669fbddcf8dd1880a155ae362bb55ae776	16113070	0xdeb648130ee9ce05c11c896f42e6ee2721b8de07bf4b26aee6f0b2c75ab7773e
345	0x5fcd339bc44fb537174d725b05f6202579aeb44a588c9d94dca3cc09deb03ebb	0x0acdd0fefb605957dfcba4816d77c43dec3f1f79	0x0200809e3c5168bf8a31c2e55edba119aa47db7a	3000000000000000	0x	16113070	0xdeb648130ee9ce05c11c896f42e6ee2721b8de07bf4b26aee6f0b2c75ab7773e
346	0x49980f8ee64825cf5cf534bb4e62cc3c3e9875db3f518741bd3efdcbf45cea23	0xcbd765aceeed1f8cdfb295557c63d6f68c5b1775	0x1111111254eeb25477b68fb85ed929f73a960582	1e+16	0x0502b1c50000000000000000000000000000000000000000000000000000000000000000000000000000000000000000000000000000000000000000002386f26fc100000000000000000000000000000000000000000000000005842b42818fd3411a470000000000000000000000000000000000000000000000000000000000000080000000000000000000000000000000000000000000000000000000000000000180000000000000003b6d03409b5e338d5c3b5735a8fc497d0bbbe9f8d3d0e3d8e26b9…	16113070	0xdeb648130ee9ce05c11c896f42e6ee2721b8de07bf4b26aee6f0b2c75ab7773e
348	0x9b7bb8289bba7dc8f7a818d20aef6516e4377e9507e5a0ecd6eee52c6df90ad4	0x616fc752e4d9503b1b65b51f1113003ab2256ce9	0x92fc62be436abd5dd042ba4a982f8b3c4e366922	100000000000	0xefef39a10000000000000000000000000000000000000000000000000000000000000000	16113070	0xdeb648130ee9ce05c11c896f42e6ee2721b8de07bf4b26aee6f0b2c75ab7773e
349	0x4ea1db3e5a4f0372342fa55b3c261a76cd5ae4ea8723ff84326d076e51c07777	0x91af9d1d34bc2dfceafc8e83291b38d53dd6d43f	0xbc4e8115e17d96cfd8e3ecef2b0d6e19d00f70b2	0	0xa22cb4650000000000000000000000001e0049783f008a0085193e00003d00cd54003c710000000000000000000000000000000000000000000000000000000000000001	16113070	0xdeb648130ee9ce05c11c896f42e6ee2721b8de07bf4b26aee6f0b2c75ab7773e
351	0x6ae50ddc8908d4476f4612e9e59c2fa253eafa63e827077592a28daf8ec4f42f	0x07a6287facbeae3ab55cad0ada9bb46700131d4b	0xf048cbaad26c1a35e7a04e126fdeb9c8045e676b	0	0x095ea7b30000000000000000000000009ade9ea6fd4fca08e27db8d2b607e3e30bcb0ab20000000000000000000000000000000000000000000000000000000000001c9a	16113070	0xdeb648130ee9ce05c11c896f42e6ee2721b8de07bf4b26aee6f0b2c75ab7773e
352	0x12f3042a20c75429623a536ad6e35cbefe1b412e6b414a2cdc43309acc17694a	0xf66e602ee8c33300a2ee45e14c10b20872e97d45	0xabea9132b05a70803a4e85094fd0e1800777fbef	8.42e+16	0x2d2da806000000000000000000000000f66e602ee8c33300a2ee45e14c10b20872e97d45	16113070	0xdeb648130ee9ce05c11c896f42e6ee2721b8de07bf4b26aee6f0b2c75ab7773e
354	0x91034f0ea9e3d254923ce1ca1da14692610d4e234808a5628b2673407d591dca	0xa220f78711d28963f97fe97fba7406ab90779600	0xf5503ee8d23f59327ee9e360a53ca1585bf7a374	1070000000000000	0x	16113070	0xdeb648130ee9ce05c11c896f42e6ee2721b8de07bf4b26aee6f0b2c75ab7773e
357	0x6ccc38b5cc4f12d75571ed7399a0ab2189883f927ca75939bff1b1b655f32f13	0x4768a5dd0873d14acfd33d09ed6f6a16baa9494f	0xa0b86991c6218b36c1d19d4a2e9eb0ce3606eb48	0	0xa9059cbb0000000000000000000000002a5d5fea2bd48695ecff8bb58339c1a6e0f6e17b000000000000000000000000000000000000000000000000000000002e6e98c0	16113070	0xdeb648130ee9ce05c11c896f42e6ee2721b8de07bf4b26aee6f0b2c75ab7773e
359	0x5c356393a9cfdecb5e730e612dbe29e54de9b3efa25e98de06de61b499fc3b6f	0x4d555da2ec34efcf1a9aeccbbb53a380dcd4dfb1	0x881d40237659c251811cec9c364ef91dc08d300c	0	0x5f575529000000000000000000000000000000000000000000000000000000000000008000000000000000000000000070e8de73ce538da2beed35d14187f6959a8eca960000000000000000000000000000000000000000000000000000000002aea54000000000000000000000000000000000000000000000000000000000000000c000000000000000000000000000000000000000000000000000000000000000136f6e65496e6368563446656544796e616d69630000000000000000000000000000000…	16113070	0xdeb648130ee9ce05c11c896f42e6ee2721b8de07bf4b26aee6f0b2c75ab7773e
361	0x862cd70dead264ef523775a77f907203815bbefe93afcd85de627fc4507f85e6	0x4d02fa8431c858169b5bbf8245df6fefb1e66395	0x0da920b49477f7d02a1da63a198fc877f65a40c4	0	0xbcd1c1e500000000000000000000000000000000000000000000000000000000000000000000000000000000000000000000000000000000000000000000000000000040000000000000000000000000000000000000000000000000000000000000000100000000000000000000000000000000000000000000000000000000000014c5	16113070	0xdeb648130ee9ce05c11c896f42e6ee2721b8de07bf4b26aee6f0b2c75ab7773e
363	0xba24d48b92baaf2d1310067871ec08abd17fdcff4075a0e9fa918ab1ecfc4404	0x44f32315acffe073e44d8c47d6549a5288c01086	0x39da41747a83aee658334415666f3ef92dd0d541	2.62e+18	0x9a2b81150000000000000000000000000000000000000000000000000000000000000020000000000000000000000000000000000000000000000000000000000000000100000000000000000000000000000000000000000000000000000000000000200000000000000000000000000000000000000000000000000000000000000004000000000000000000000000000000000000000000000000244de53af7c6f000000000000000000000000000000000000000000000000000000000000000006000000…	16113070	0xdeb648130ee9ce05c11c896f42e6ee2721b8de07bf4b26aee6f0b2c75ab7773e
364	0xcfe64210b069bc0aabac3906c621801d36907f28b1593affabf045ee0e32f630	0xc3d88d230778c1edd6884aaaca3499fd912ecd0d	0xb5610d81efce52326e91719366f192102297c215	2e+17	0x	16113070	0xdeb648130ee9ce05c11c896f42e6ee2721b8de07bf4b26aee6f0b2c75ab7773e
367	0x0f427148f99cb6fa114ea668d9468a13f576680ad143b26102be6fc509572b99	0x4294350dd148a0dd7d352418deafaef8c64296e6	0xfeeeef4d7b4bf3cc8bd012d02d32ba5fd3d51e31	0	0x095ea7b3000000000000000000000000eb72b0aa3f45f0a354b974b1f952ff9618e017f8ffffffffffffffffffffffffffffffffffffffffffffffffffffffffffffffff	16113070	0xdeb648130ee9ce05c11c896f42e6ee2721b8de07bf4b26aee6f0b2c75ab7773e
369	0xdad450026ac54b5eacb85955e8be2493afb960f23b45446b21d47021175cb0f0	0xbc1353c152fea0e6fa386d76cab35f4bc9e7131b	0x0ff1f3a53f521d74af73fe7433abf802f91ddd4e	0	0x42842e0e000000000000000000000000bc1353c152fea0e6fa386d76cab35f4bc9e7131b000000000000000000000000bdad428434caa0574dad0144ec95fd2ca6d40de3000000000000000000000000000000000000000000000000000000000000016d360c6ebe	16113070	0xdeb648130ee9ce05c11c896f42e6ee2721b8de07bf4b26aee6f0b2c75ab7773e
373	0xf2773c30053ee1875c0199244dcccf4e9f821dcd6f1f19021cdfce09e3e06b9d	0x1be210e7990eff6c07cb8cadcb9d077063ac3614	0xd9f81447a8705e32439e372de9aed7efb01970d2	2100000000000000	0x	16113070	0xdeb648130ee9ce05c11c896f42e6ee2721b8de07bf4b26aee6f0b2c75ab7773e
374	0x954d5cf9864686f8ce736dab0d6650db7bdd9668dc1a5ebdc0df6b7f89eb1136	0x8c8d7c46219d9205f056f28fee5950ad564d7465	0xdac17f958d2ee523a2206206994597c13d831ec7	0	0xa9059cbb000000000000000000000000e889554fb7cf5f9d7ea55d265eb58126271dd2f60000000000000000000000000000000000000000000000000000000056059848	16113070	0xdeb648130ee9ce05c11c896f42e6ee2721b8de07bf4b26aee6f0b2c75ab7773e
375	0xfd886f3a87e71da14b72bb5971acb1bf75d87664067c0c0ffc1bf9a706236375	0x7ca4926b101a71eb6eae564534d9eda2278b4bd9	0x6913233ada65330adf01f24f715dffcc60497cc8	0	0x42842e0e0000000000000000000000007ca4926b101a71eb6eae564534d9eda2278b4bd9000000000000000000000000a018993774fac9df421506000982b262ceec10540000000000000000000000000000000000000000000000000000000000001716360c6ebe	16113070	0xdeb648130ee9ce05c11c896f42e6ee2721b8de07bf4b26aee6f0b2c75ab7773e
376	0x3b3b808f2e86896012b329b43fde37328c5fa8951a7a240b911d5733094035e4	0xaf83d2274120adbfd70b450654953405ab1636d2	0x316b0ba0f68cbb47ccd58f60f371729a18bfdfb2	4760000000000000	0x	16113070	0xdeb648130ee9ce05c11c896f42e6ee2721b8de07bf4b26aee6f0b2c75ab7773e
378	0x28b099f5da15b2afc4f3ee56960d5512204232ec7f1603295d023db79d8b351f	0x03a22c370d770683afcf006244c06b956bdf53c4	0x0000000000c04ecfab591e5e517551288afebbfe	120000000000	0xc550282f50e0c03a7a0d669fbddcf8dd1880a155aeeb828447bfa75eee35f8d59aca4600a922e17e93362bb55ae775	16113070	0xdeb648130ee9ce05c11c896f42e6ee2721b8de07bf4b26aee6f0b2c75ab7773e
379	0xbcb144b607f22119a531c9be284aabd7f38be74df4fd902c0dbe0063facb09a1	0x05723597e3a552616739dc5c45a4f595ad838764	0x00000000006c3852cbef3e08e8df289169ede581	2.65e+16	0xfb0f3ee10000000000000000000000000000000000000000000000000000000000000020000000000000000000000000000000000000000000000000000000000000000000000000000000000000000000000000000000000000000000000000000000000000000000000000000000000000000000000000000000000059708774387000000000000000000000000000463f5518a2a739b80d95dd3dfb94eb311eaef16a000000000000000000000000004c00500000ad104d7dbd00e3ae0a5c00560c0000000…	16113070	0xdeb648130ee9ce05c11c896f42e6ee2721b8de07bf4b26aee6f0b2c75ab7773e
380	0x8ba23a7e14fcce780afd7d42eb0923165e8f52f9caaa8ff26efa9bb60fb2d210	0xf5491f793d47a6ea22f5e0b9ad3990cf66c4b40b	0xdac17f958d2ee523a2206206994597c13d831ec7	0	0xa9059cbb0000000000000000000000007ff32e44ca6eff3cce640e6a2075eb3f83649f560000000000000000000000000000000000000000000000000000000000989680	16113070	0xdeb648130ee9ce05c11c896f42e6ee2721b8de07bf4b26aee6f0b2c75ab7773e
382	0xd40e51be4c12ce1c886174b0d3153df5a2e0e70927476e51b3ab85d414bbbe82	0x9f159bef24222893e5fca55bed42cb56320168c5	0x68b3465833fb72a70ecdf485e0e4c7bd8665fc45	0	0x5ae401dc00000000000000000000000000000000000000000000000000000000638ce62b00000000000000000000000000000000000000000000000000000000000000400000000000000000000000000000000000000000000000000000000000000001000000000000000000000000000000000000000000000000000000000000002000000000000000000000000000000000000000000000000000000000000000e404e45aaf000000000000000000000000dac17f958d2ee523a2206206994597c13d831…	16113070	0xdeb648130ee9ce05c11c896f42e6ee2721b8de07bf4b26aee6f0b2c75ab7773e
383	0x0f6e0c0606dc7f647bff78000472c650f1bc0350bc26b201957bcb3ad4fc1331	0x1be210e7990eff6c07cb8cadcb9d077063ac3614	0x65b463d7b7f955fef6b2a54c96cafaa37fd6fc12	2100000000000000	0x	16113070	0xdeb648130ee9ce05c11c896f42e6ee2721b8de07bf4b26aee6f0b2c75ab7773e
384	0x4eedb83f9c39bf2a4c2cd3393c55c96b1156912ce4477eb8257541ea61f8e961	0x6451fc4a41bd264cf55fd0abc4b6d1853266de15	0xca6d7604ae55ba1ba864c26692a91979f25cdb96	0	0x962cb602000000000000000000000000000000000000000000000000000000000000002000000000000000000000000000000000000000000000000000000000000000414b0dfe93a8b2dcb1d9a66a68e248aec973426577d86168bd44619acfbb1d1fd23b02ab3d0cdbab99da2d84fc5bd8093055d4ea4e197057703c15f6b3ad807c901c00000000000000000000000000000000000000000000000000000000000000	16113070	0xdeb648130ee9ce05c11c896f42e6ee2721b8de07bf4b26aee6f0b2c75ab7773e
387	0x88b88961d0a62e915c970c1a0f44fc62a5786c438fa09667daaf0ccfb720f25e	0xb442bbfb831b6dd0b09a41a4a85df905416bceb3	0x5dee81dac424fbdc5daebdbb9cf57ad2ea4ee735	0	0xa9059cbb0000000000000000000000005dee81dac424fbdc5daebdbb9cf57ad2ea4ee7350000000000000000000000000000000000000000000000000de0b6b3a7640000	16113070	0xdeb648130ee9ce05c11c896f42e6ee2721b8de07bf4b26aee6f0b2c75ab7773e
392	0xa68f1822895712967b5a6909e165195d475078c0859f6695a890f1179f6ed2b4	0x41aa7d375914ea1cb5a855642fc1924fd7e4ea17	0xeeeec6476073778077b40a73fe32e23a9876cab4	7.94e+16	0x2b66d72e000000000000000000000000000000000000000000000000000000000000002000000000000000000000000000000000000000000000000000000000000000ea65794a68624763694f694a46557a49314e694973496d74705a434936496a64684e6a526c5a6d51314c544a694e4463744e475a6a5a6931684f4463784c5445785a6d59354f5451345954646a4f434a392e436751784d6a553545674e56553051614a4749345a6d597a4d6a646a4c5759354e4463744e44686b596930354d54466d4c5…	16113070	0xdeb648130ee9ce05c11c896f42e6ee2721b8de07bf4b26aee6f0b2c75ab7773e
393	0x5f0c1a431ed8f6d9d300ab8380f55b00e5a9d075581f34e87ed44fa0e4edcd3a	0x4a2ff83715ed538e9634809db9e32dbbbf3e7ff4	0x68b3465833fb72a70ecdf485e0e4c7bd8665fc45	0	0x5ae401dc00000000000000000000000000000000000000000000000000000000638ce61f000000000000000000000000000000000000000000000000000000000000004000000000000000000000000000000000000000000000000000000000000000020000000000000000000000000000000000000000000000000000000000000040000000000000000000000000000000000000000000000000000000000000016000000000000000000000000000000000000000000000000000000000000000e4472b4…	16113070	0xdeb648130ee9ce05c11c896f42e6ee2721b8de07bf4b26aee6f0b2c75ab7773e
395	0x3d2092cdcd411607976bf8439ff8911d351de96d0c13105ba1fd5feab673e73b	0x5780cfb0d2b9f92f4b491213ba9df7b4b991ca19	0xe93bf5c935c0f9b497165a744eced9ea5c1f7dda	1e+16	0xb3ab66b00000000000000000000000000000000000000000000000000000000000000001	16113070	0xdeb648130ee9ce05c11c896f42e6ee2721b8de07bf4b26aee6f0b2c75ab7773e
397	0xe683dcaceecd9b053b098c48849bc808884c4bcc6d41cf14f85e84f19973ad59	0x43851c57031662f2799be99c46b37bbd0e7df244	0x00000000006c3852cbef3e08e8df289169ede581	1.68e+18	0xed98a57400000000000000000000000000000000000000000000000000000000000000a000000000000000000000000000000000000000000000000000000000000010e000000000000000000000000000000000000000000000000000000000000012800000007b02230091a7ed01230072f7006a004d60a8d4e71d599b8104250f00000000000000000000000000000000000000000000000000000000000000000003000000000000000000000000000000000000000000000000000000000000000300000…	16113070	0xdeb648130ee9ce05c11c896f42e6ee2721b8de07bf4b26aee6f0b2c75ab7773e
400	0x676d1310f5de7bde650269998b1b1da2bd1914ba3dbc4b0fdca03dad88f6a8a6	0xa2164514f8e2d9c5f6662bd96a76c90164bf8bc5	0xcda72070e455bb31c7690a170224ce43623d0b6f	0	0x4ce6931a000000000000000000000000086e82d7e2beac68e451f59623777c61bc4c0ebc00000000000000000000000000000000000000000000000000000000000000020000000000000000000000000000000000000000000000000214e8348c4f0000	16113070	0xdeb648130ee9ce05c11c896f42e6ee2721b8de07bf4b26aee6f0b2c75ab7773e
401	0x7fefea7feac42cae8c8019725a3ce4a8df944ea486e6e19c9ab73614c2b899da	0x7a5d27cd2376f74a9b79e524acc44426c1bdd2a5	0xc02aaa39b223fe8d0a0e5c4f27ead9083c756cc2	0	0x095ea7b30000000000000000000000001e0049783f008a0085193e00003d00cd54003c71ffffffffffffffffffffffffffffffffffffffffffffffffffffffffffffffff	16113070	0xdeb648130ee9ce05c11c896f42e6ee2721b8de07bf4b26aee6f0b2c75ab7773e
402	0x21d82db7ee8ae5d657eba045804ddad5a58439b4c2190c0c5e4037d6a27bb993	0x6ece61d29b90642941c41240da924690da145696	0x5a54fe5234e811466d5366846283323c954310b2	0	0x46f83b50000000000000000000000000000000000000000000000000000000000000006ec59815a1f0fbec4bf2c2d63aaec05a630d9b147bb7e96af24e7b066db9f92e4800000000000000000000000000000000000000000000000000000000000000146798ba1b1aae7584f53916a1926177a694d53d9f6ac039122fc00d1e28889ce3	16113070	0xdeb648130ee9ce05c11c896f42e6ee2721b8de07bf4b26aee6f0b2c75ab7773e
403	0xd2dfd6e38a04607a520de350bb43f1250f1aea8abd340a4ae9a0cf14ba41635b	0x4a86ad8cfc8ac45fe670e01edb566845f879aa45	0x29f94101c705cd64b0a472044fd3d7ab7a302be2	5.87e+17	0x	16113070	0xdeb648130ee9ce05c11c896f42e6ee2721b8de07bf4b26aee6f0b2c75ab7773e
405	0x3c7aae69ea95f110bbb955050bf02c4d9d9e978aa42486cf0ffe104fc21bb37b	0x1be210e7990eff6c07cb8cadcb9d077063ac3614	0xa8a6070940897fc6c697cb2705e40e92a2359795	2100000000000000	0x	16113070	0xdeb648130ee9ce05c11c896f42e6ee2721b8de07bf4b26aee6f0b2c75ab7773e
406	0x681d49d538655c14dced240341655e664cd0e16c63ef07a1fa0e6e4638da00f8	0xf2f5c73fa04406b1995e397b55c24ab1f3ea726c	0x4675c7e5baafbffbca748158becba61ef3b0a263	2.6e+16	0x	16113070	0xdeb648130ee9ce05c11c896f42e6ee2721b8de07bf4b26aee6f0b2c75ab7773e
409	0x8982d83d6e32c7a72e59e50332accf52851d90dcf8b449a3c4174cd8f7c82744	0x07a2cf3c078d9526eb50ba7affabc0049827d126	0x36614aeddacd9be273a3694bf36510afc952c625	5.8e+17	0x	16113070	0xdeb648130ee9ce05c11c896f42e6ee2721b8de07bf4b26aee6f0b2c75ab7773e
411	0x00eb96dc4736d0389b4c54ef0e7b75865b9280575c74d558b213c1d80a7cc0b4	0xba765a18d026c1080c153481224fb785d5773b46	0xdec59ebe9fc8c705fa2f2d61c9da8e8fb9712aaf	3.5e+17	0x	16113070	0xdeb648130ee9ce05c11c896f42e6ee2721b8de07bf4b26aee6f0b2c75ab7773e
413	0xf9c82e9731650fef8642c81c32dd4db6201ece00a90cf153679ee46624febc48	0xc276cd4991bfbdaebd24eb604071b2f64f986da2	0x42fe737749683595e4315b443eadcc9346a994d9	0	0x42842e0e000000000000000000000000c276cd4991bfbdaebd24eb604071b2f64f986da2000000000000000000000000f82efd982ff5980166032f18c7082f39fb6cd32b000000000000000000000000000000000000000000000000000000000000bded360c6ebe	16113070	0xdeb648130ee9ce05c11c896f42e6ee2721b8de07bf4b26aee6f0b2c75ab7773e
416	0xa3711e8938d89a11b7f61e7ed9c2639d8bdea626f8e64468ede8a8491c94d51c	0x4d555da2ec34efcf1a9aeccbbb53a380dcd4dfb1	0x70e8de73ce538da2beed35d14187f6959a8eca96	0	0x095ea7b3000000000000000000000000881d40237659c251811cec9c364ef91dc08d300cffffffffffffffffffffffffffffffffffffffffffffffffffffffffffffffff	16113070	0xdeb648130ee9ce05c11c896f42e6ee2721b8de07bf4b26aee6f0b2c75ab7773e
417	0x31a2c87b84ca813200317c192cd649469b20f686ab862af207fcadf3e9d74754	0x0aeee23d16084d763e7a65577020c1f3d18804f2	0xdac17f958d2ee523a2206206994597c13d831ec7	0	0xa9059cbb0000000000000000000000002c0c5233a36ef22970db187e92e972bcd9ef809d0000000000000000000000000000000000000000000000000000000007131842	16113070	0xdeb648130ee9ce05c11c896f42e6ee2721b8de07bf4b26aee6f0b2c75ab7773e
418	0x0eff0ce648397226e7abba913f261974dd7f5415cbbaab07c929a35a0aad6b8d	0x129c24df1bd82bc2ce9f461063af011662926ba5	0x9fb4717247590eed3e0e4debaa4ea8604ae08319	3000000000000000	0x	16113070	0xdeb648130ee9ce05c11c896f42e6ee2721b8de07bf4b26aee6f0b2c75ab7773e
419	0x6117cd8b408dcb3478207776a1e0642e08ccb1e96e93560dad0f09faa86e3ca4	0xd8fef4bb781ad488b124b86b0bc7701454060160	0x00000000006c3852cbef3e08e8df289169ede581	0	0xfd9f1e10000000000000000000000000000000000000000000000000000000000000002000000000000000000000000000000000000000000000000000000000000000010000000000000000000000000000000000000000000000000000000000000020000000000000000000000000d8fef4bb781ad488b124b86b0bc7701454060160000000000000000000000000004c00500000ad104d7dbd00e3ae0a5c00560c00000000000000000000000000000000000000000000000000000000000000016000000…	16113070	0xdeb648130ee9ce05c11c896f42e6ee2721b8de07bf4b26aee6f0b2c75ab7773e
420	0xf33eac16dbf00eb0e9b8a91c7bbbfc62d153313b59b5114f994ccfc3674fb1a9	0x1be210e7990eff6c07cb8cadcb9d077063ac3614	0x9bd7c44bba95eafa76916a7830d81af5e4219437	2100000000000000	0x	16113070	0xdeb648130ee9ce05c11c896f42e6ee2721b8de07bf4b26aee6f0b2c75ab7773e
421	0x2d5ef7bb6182284e4a84fbd11816bd4ca176bc258a4e028ca01236e03ecdd121	0x58f15476d8d50b5e354528fab682db67a7d2fe1c	0x7492e30d60d96c58ed0f0dc2fe536098c620c4c0	0	0xefef39a10000000000000000000000000000000000000000000000000000000000000001	16113070	0xdeb648130ee9ce05c11c896f42e6ee2721b8de07bf4b26aee6f0b2c75ab7773e
424	0x87cac98422d918e1c84cd861d5c0613420fb815868841c38ee77c81b56d90470	0x9085b76fc84fd834d949d12712d050597a3fa2a8	0x0000000000c2d145a2526bd8c716263bfebe1a72	0	0x32389b7100000000000000000000000000000000000000000000000000000000000000400000007b02230091a7ed01230072f7006a004d60a8d4e71d599b8104250f00000000000000000000000000000000000000000000000000000000000000000001000000000000000000000000000000000000000000000000000000000000002000000000000000000000000000000000000000000000000000000000000000600000000000000000000000004a3e7f6649b815f593638b4883b4911a21fbbee700000…	16113070	0xdeb648130ee9ce05c11c896f42e6ee2721b8de07bf4b26aee6f0b2c75ab7773e
426	0x3eb79ccd155e7444d0c4c350142a191e1c1471cd5afe6c2dce8f5d13c974745c	0xe4e58fe4a2f323eaf816b494fe396b949d368551	0xdac17f958d2ee523a2206206994597c13d831ec7	0	0xa9059cbb000000000000000000000000912fd21d7a69678227fe6d08c64222db41477ba00000000000000000000000000000000000000000000000000000000000000000	16113070	0xdeb648130ee9ce05c11c896f42e6ee2721b8de07bf4b26aee6f0b2c75ab7773e
428	0xd5710ee632b443d3b2b9799f67738ea1921a1ddc0baf4bb919b037ca7ef0e02c	0xda00a1d539b48fc9ffb2047b925b7f14437d1881	0xa0b86991c6218b36c1d19d4a2e9eb0ce3606eb48	0	0x095ea7b30000000000000000000000008e8bd01b5a9eb272cc3892a2e40e64a716aa2a40ffffffffffffffffffffffffffffffffffffffffffffffffffffffffffffffff	16113070	0xdeb648130ee9ce05c11c896f42e6ee2721b8de07bf4b26aee6f0b2c75ab7773e
429	0x8fb5cc75544a65cef51576cd1f3c19c2ec023be1491e06f020a0b25e9bccf4ce	0x1c7693b6c10af504d7f3d4db0d84ebfc2dee7bf9	0x283af0b28c62c092c9727f1ee09c02ca627eb7f5	4370000000000000	0xf7a1696300000000000000000000000000000000000000000000000000000000000000c00000000000000000000000001c7693b6c10af504d7f3d4db0d84ebfc2dee7bf90000000000000000000000000000000000000000000000000000000001e18558a9b78f77346230d8ef4d4bb101a74f94a25b1bffecaf826edb1d0e9362217fb90000000000000000000000004976fb03c32e5b8cfe2b6ccb31c09ba78ebaba410000000000000000000000001c7693b6c10af504d7f3d4db0d84ebfc2dee7bf900000…	16113070	0xdeb648130ee9ce05c11c896f42e6ee2721b8de07bf4b26aee6f0b2c75ab7773e
432	0x0454453439706158aae2b580a29772a6df9613d48ae9df946b14c941ad8740fa	0x0758e77def8db3e078dd579a2e686a4543e5d6eb	0xeeeec6476073778077b40a73fe32e23a9876cab4	7.94e+16	0x2b66d72e000000000000000000000000000000000000000000000000000000000000002000000000000000000000000000000000000000000000000000000000000000ea65794a68624763694f694a46557a49314e694973496d74705a434936496a64684e6a526c5a6d51314c544a694e4463744e475a6a5a6931684f4463784c5445785a6d59354f5451345954646a4f434a392e436751784d6a553545674e56553051614a446c6c4f44466d4e57497a4c5441314d5755744e4745304d5331684d7a6b324c5…	16113070	0xdeb648130ee9ce05c11c896f42e6ee2721b8de07bf4b26aee6f0b2c75ab7773e
434	0xd2cb2d02da2f6396733523c2a9c60eb10b672643bd0fde47de323a952d0d1cdd	0x04cc004b01b7d2cba1f0f47e5af9dfd347128e48	0x67b7dfa1d0cf106cefa82f444561ff3a8e5708c8	1980000000000000	0x	16113070	0xdeb648130ee9ce05c11c896f42e6ee2721b8de07bf4b26aee6f0b2c75ab7773e
435	0xe4983507a130c44f8edaf43bdd0999a0bfa2c6c82e6b58a8cf2d062f219fff14	0xb7d616f31d6f52f7fed6e2d11cd83cc5cc006885	0x0000000000c2d145a2526bd8c716263bfebe1a72	0	0x32389b7100000000000000000000000000000000000000000000000000000000000000400000007b02230091a7ed01230072f7006a004d60a8d4e71d599b8104250f00000000000000000000000000000000000000000000000000000000000000000001000000000000000000000000000000000000000000000000000000000000002000000000000000000000000000000000000000000000000000000000000000600000000000000000000000003c7e5677fc7cf6a1bba58bdf3797f128b178e4bd00000…	16113070	0xdeb648130ee9ce05c11c896f42e6ee2721b8de07bf4b26aee6f0b2c75ab7773e
437	0xf0425d45b64df83a84dc7551d0f109e467b32b708ef30f953134f466cfec5b8a	0xebd01b36df9d53ba9e8501aacdf8e3a09385e2dd	0x68b3465833fb72a70ecdf485e0e4c7bd8665fc45	5e+17	0x5ae401dc00000000000000000000000000000000000000000000000000000000638ce61f00000000000000000000000000000000000000000000000000000000000000400000000000000000000000000000000000000000000000000000000000000001000000000000000000000000000000000000000000000000000000000000002000000000000000000000000000000000000000000000000000000000000000e4472b43f300000000000000000000000000000000000000000000000006f05b59d3b20…	16113070	0xdeb648130ee9ce05c11c896f42e6ee2721b8de07bf4b26aee6f0b2c75ab7773e
438	0x3a59a396af390136cf71f62809b0bd594843ff6e7b896613452237233d0f475a	0x11b7e01c575e0be5334b2aa491c5600fc8e2da50	0xd4190dd1da460fc7bc41a792e688604778820ac9	0	0xa22cb465000000000000000000000000f42aa99f011a1fa7cda90e5e98b277e306bca83e0000000000000000000000000000000000000000000000000000000000000000	16113070	0xdeb648130ee9ce05c11c896f42e6ee2721b8de07bf4b26aee6f0b2c75ab7773e
440	0x26c85439bbbe1e472a3a0f7c6eb4ee026c31be7796b1932b6c84400923ab1a16	0x506a48155c891c78c04bc0b70eb1d9b2361635e0	0x77bd077fffe51edfc4913ee50506a3e59063bbea	0	0x095ea7b30000000000000000000000007cc46cf6392ed9db45351a3f82eb2cc3b83da761ffffffffffffffffffffffffffffffffffffffffffffffffffffffffffffffff	16113070	0xdeb648130ee9ce05c11c896f42e6ee2721b8de07bf4b26aee6f0b2c75ab7773e
441	0x89c5c2704dfd20ee27c6c48eab647c122e157e549867eb240b386695421f6dd9	0x495df9893d81568422cda452a3146099213ec0b6	0x75cda57917e9f73705dc8bcf8a6b2f99adbdc5a5	0	0x2e4dbe8f000000000000000000000000000000000000000000000000000000000000254300000000000000000000000091eeda83433690056e22fe33f0e2ffc754ba107600000000000000000000000000000000000000000000000000000000043b9ada000000000000000000000000000000000000000000000000000000000000254300000000000000000000000000000000000000000000000000000000000000a0000000000000000000000000000000000000000000000000000000000000004119453…	16113070	0xdeb648130ee9ce05c11c896f42e6ee2721b8de07bf4b26aee6f0b2c75ab7773e
442	0x50d743908c012be1e1e011d0b4fab69fd6303355cd642170843963a225b20650	0xdef738303029d2564f24b326b2e47a0ed404c203	0x1f0ab3d4f62609ba423050b4ceb72cba18abafd4	0	0xa22cb4650000000000000000000000001e0049783f008a0085193e00003d00cd54003c710000000000000000000000000000000000000000000000000000000000000001	16113070	0xdeb648130ee9ce05c11c896f42e6ee2721b8de07bf4b26aee6f0b2c75ab7773e
445	0x70ba8ae30a92881db6458120a8eb06515eee5c33b9a68db15fc0b265956fcfc3	0x0422bff26c6a754ab6e0ff77d3ae6098f7237db8	0x00000000006c3852cbef3e08e8df289169ede581	0	0xfd9f1e100000000000000000000000000000000000000000000000000000000000000020000000000000000000000000000000000000000000000000000000000000000100000000000000000000000000000000000000000000000000000000000000200000000000000000000000000422bff26c6a754ab6e0ff77d3ae6098f7237db8000000000000000000000000004c00500000ad104d7dbd00e3ae0a5c00560c00000000000000000000000000000000000000000000000000000000000000016000000…	16113069	0x0ce4b1b24271573a767b18514c46a7aec019fbc3fb4c2dfa34dfc1ccbaa68fbf
446	0xd24b8f3c6af45856a09a31f4d71acb7e3ed6664fe08c1fac0a1b5cded3ee5429	0xf0ed97f600f0b9877acb3242a5e45e164fa722aa	0x76f4eed9fe41262669d0250b2a97db79712ad855	1.8e+17	0xf17a454600000000000000000000000000000000000000000000000000000000000000c000000000000000000000000000000000000000000000000000000000000001a0000000000000000000000000000000000000000000000000000000000d896a24000000000000000000000000000000000000000000000000000000000d66c2ae0000000000000000000000001d64fb0ffa8362b2e1ee7ee03929159551eab26e000000000000000000000000000000000000000000000000000000000000022000000…	16113069	0x0ce4b1b24271573a767b18514c46a7aec019fbc3fb4c2dfa34dfc1ccbaa68fbf
447	0xb0a18d52f6a52c0fb2d711605b29549e3f2895cf0ffde66885102e3aa0a5c20a	0x7c2b528838d5c8b676b4a99ee72e20d7a5d62d54	0x76f4eed9fe41262669d0250b2a97db79712ad855	0	0xf17a454600000000000000000000000000000000000000000000000000000000000000c000000000000000000000000000000000000000000000000000000000000001a0000000000000000000000000000000000000000000000000000000037e2efaec00000000000000000000000000000000000000000000000000000003753dded00000000000000000000000001d64fb0ffa8362b2e1ee7ee03929159551eab26e000000000000000000000000000000000000000000000000000000000000022000000…	16113069	0x0ce4b1b24271573a767b18514c46a7aec019fbc3fb4c2dfa34dfc1ccbaa68fbf
448	0xa55d0198e642ccc7903762f126978354d3a172edef272c2c38fbaa9dffce3caf	0x000f422887ea7d370ff31173fd3b46c8f66a5b1c	0x5f6b3938cc56f06de1148bc63439f4749e2e378d	1.62e+16	0x	16113069	0x0ce4b1b24271573a767b18514c46a7aec019fbc3fb4c2dfa34dfc1ccbaa68fbf
450	0x25fe0e696b2607e127c93e3ddd1780b69c8a9bd0da3e304122fc726eac802842	0x25c24de48d6bb4808947d1e61067a2d3afc0c9e0	0x76f4eed9fe41262669d0250b2a97db79712ad855	0	0xf17a454600000000000000000000000000000000000000000000000000000000000000c000000000000000000000000000000000000000000000000000000000000001a000000000000000000000000000000000000000000000000000000009bb9d66d200000000000000000000000000000000000000000000000000000009b91f8c590000000000000000000000001d64fb0ffa8362b2e1ee7ee03929159551eab26e000000000000000000000000000000000000000000000000000000000000022000000…	16113069	0x0ce4b1b24271573a767b18514c46a7aec019fbc3fb4c2dfa34dfc1ccbaa68fbf
451	0x6b51d140c31e16dfc0c36a63e667b64389d4bc5c959a1b6f7de00dcbf4996c67	0xfbae2ff6b20c897e75a443050e834f8a5a59aa6f	0xc02aaa39b223fe8d0a0e5c4f27ead9083c756cc2	0	0x2e1a7d4d00000000000000000000000000000000000000000000000000bc4b381d188000	16113069	0x0ce4b1b24271573a767b18514c46a7aec019fbc3fb4c2dfa34dfc1ccbaa68fbf
452	0xcc9a04283e2b5ed5f0e5e969be08a78be37f4b2e1c7b14a9d1d845d2e4fc12b4	0xcc09d6d8d704782e0b3b489038e80e4baa08622e	0x9848482da3ee3076165ce6497eda906e66bb85c5	100000000000000	0x3df021240000000000000000000000000000000000000000000000000000000000000000000000000000000000000000000000000000000000000000000000000000000100000000000000000000000000000000000000000000000000005af3107a4000000000000000000000000000000000000000000000000000000052a8895ccca5	16113069	0x0ce4b1b24271573a767b18514c46a7aec019fbc3fb4c2dfa34dfc1ccbaa68fbf
453	0xbeecb30d5d58ac1ea5206902ce5e7982f98deb60590468c57953d934dbded821	0xe6fa4cf816950eb69e0eb0615b01437d01b1bde4	0xa0b86991c6218b36c1d19d4a2e9eb0ce3606eb48	0	0xa9059cbb0000000000000000000000006bbe40ce87efb88264c1ded86c3b116640df30b80000000000000000000000000000000000000000000000000000000f224d4a00	16113069	0x0ce4b1b24271573a767b18514c46a7aec019fbc3fb4c2dfa34dfc1ccbaa68fbf
454	0x2c93b9ea5e37faacadffde841bd76e1761e4f5852c06451a870584db77094f86	0x135aed587fd3b8d51991a591a49ef3c46d051a7d	0xac8543b14aac9a70b98b728d308c4e1c542d4818	2.51e+17	0x	16113069	0x0ce4b1b24271573a767b18514c46a7aec019fbc3fb4c2dfa34dfc1ccbaa68fbf
456	0x7541fc9dd0034faecf7597dfb4bf465e86c590edc71cb3085f8b431347404155	0x23f4569002a5a07f0ecf688142eeb6bcd883eef8	0x7ea3cb085d3095b4fd28bf4693b6c36991b01a86	3.17e+16	0x	16113069	0x0ce4b1b24271573a767b18514c46a7aec019fbc3fb4c2dfa34dfc1ccbaa68fbf
457	0x6c006a21d8bea710b591a23c6a839914f438df87dbc7467d2335ea24d732f637	0x11b7e01c575e0be5334b2aa491c5600fc8e2da50	0xd4190dd1da460fc7bc41a792e688604778820ac9	0	0xa22cb46500000000000000000000000020f780a973856b93f63670377900c1d2a50a77c40000000000000000000000000000000000000000000000000000000000000000	16113069	0x0ce4b1b24271573a767b18514c46a7aec019fbc3fb4c2dfa34dfc1ccbaa68fbf
458	0xe3ffc0b4959faa2d37a46b08e2ded17a38041936a8629a66a93d877c375bc232	0xd551076646ddaeca92810c31bc42da56204310b0	0xeeeec6476073778077b40a73fe32e23a9876cab4	7.94e+16	0x2b66d72e000000000000000000000000000000000000000000000000000000000000002000000000000000000000000000000000000000000000000000000000000000ea65794a68624763694f694a46557a49314e694973496d74705a434936496a64684e6a526c5a6d51314c544a694e4463744e475a6a5a6931684f4463784c5445785a6d59354f5451345954646a4f434a392e436751784d6a553545674e56553051614a44566a4d6d52694e4468684c574a6c4e5459744e47466c5a6930354d6a52684c5…	16113069	0x0ce4b1b24271573a767b18514c46a7aec019fbc3fb4c2dfa34dfc1ccbaa68fbf
459	0xfd0ddf8ba43058c18ad3e3246dfab836fb2352d006c0aef0374d2f4a28a37472	0x962489dd272a66c0d7357dfa3bc58dd701941196	0xe6e1d72e44416c9e85e1350a1def23603d81a9eb	3.61e+17	0x	16113069	0x0ce4b1b24271573a767b18514c46a7aec019fbc3fb4c2dfa34dfc1ccbaa68fbf
460	0x155a46d8688f1d2720fd8797f8cd9106d86d4a11bb8e4e3eb9d8fe49ef6bc06c	0x0401f41d93a0b5152a7c8319bdce9426d229b9e4	0x76f4eed9fe41262669d0250b2a97db79712ad855	0	0xf17a454600000000000000000000000000000000000000000000000000000000000000c000000000000000000000000000000000000000000000000000000000000001a000000000000000000000000000000000000000000000045c2caf71371ee1020000000000000000000000000000000000000000000000045b0ef1d3a97f5c2cc00000000000000000000000001d64fb0ffa8362b2e1ee7ee03929159551eab26e000000000000000000000000000000000000000000000000000000000000022000000…	16113069	0x0ce4b1b24271573a767b18514c46a7aec019fbc3fb4c2dfa34dfc1ccbaa68fbf
461	0x9d942db56be325440dbed909e35d15197b4f26a5028ab14a2791d39471d11fa2	0x1be210e7990eff6c07cb8cadcb9d077063ac3614	0x8c85ccdaf511e9619782441b22577fa0721bf67f	2100000000000000	0x	16113069	0x0ce4b1b24271573a767b18514c46a7aec019fbc3fb4c2dfa34dfc1ccbaa68fbf
462	0x506a08b849b5ba7e403fe41b5e2169f1dddd1519bf1a99e028d3d43aa3ac6406	0x83071b57730562a1489ab1624752273ba4956ff0	0x68b3465833fb72a70ecdf485e0e4c7bd8665fc45	1e+17	0x5ae401dc00000000000000000000000000000000000000000000000000000000638ce5cb00000000000000000000000000000000000000000000000000000000000000400000000000000000000000000000000000000000000000000000000000000001000000000000000000000000000000000000000000000000000000000000002000000000000000000000000000000000000000000000000000000000000000e4472b43f3000000000000000000000000000000000000000000000000016345785d8a0…	16113069	0x0ce4b1b24271573a767b18514c46a7aec019fbc3fb4c2dfa34dfc1ccbaa68fbf
463	0x627ff2d2f1d25ad8366d0f5163207233737d8d09c970da4419c384da8d4b77ae	0xdfc6d6de503f77cd67e328cfebf570d2c86f3e60	0x1ec85158d2e96c2f6629bea91da625305e4470e1	1300000000000000	0x	16113069	0x0ce4b1b24271573a767b18514c46a7aec019fbc3fb4c2dfa34dfc1ccbaa68fbf
465	0xb338ea97035960e72a511860a87843e69552aaf409ce71d0a8cb9c67a0662c6e	0xaf44843880c902a0d75762e2281844bac505dd24	0x8416b469e60bea4f06b28a32f159c3e3452c3f0e	2880000000000000	0x	16113069	0x0ce4b1b24271573a767b18514c46a7aec019fbc3fb4c2dfa34dfc1ccbaa68fbf
466	0x0c7295f863f8824b83dd3a107a021412dbe6ca08cdf6e532f2bd9ddc541a0fbd	0xd54b4fde949570f18f1c13952a538a1525b6cab2	0x30939775d6c935fe63ecbcc78aa18ba432373859	0	0x42966c680000000000000000000000000000000000000000000000000000000000000006	16113069	0x0ce4b1b24271573a767b18514c46a7aec019fbc3fb4c2dfa34dfc1ccbaa68fbf
468	0xe859899caffdf0e6df00955ab3268fc0de94b50b409cb83cfd42c97763c546c3	0x0d0c5b4bfccacbe1f35ef525cf7436453b37f177	0x881d40237659c251811cec9c364ef91dc08d300c	0	0x5f5755290000000000000000000000000000000000000000000000000000000000000080000000000000000000000000dac17f958d2ee523a2206206994597c13d831ec70000000000000000000000000000000000000000000000000000000017a6b00000000000000000000000000000000000000000000000000000000000000000c00000000000000000000000000000000000000000000000000000000000000017616972737761704c696768743346656544796e616d696300000000000000000000000…	16113069	0x0ce4b1b24271573a767b18514c46a7aec019fbc3fb4c2dfa34dfc1ccbaa68fbf
469	0x19cab9e55df8307f2a62abe94090601169945e6f4e26e65687dbc21f57dc144a	0x8864afd0c2e8fb24106503af89a9763daf387b55	0x00000000006c3852cbef3e08e8df289169ede581	0	0xfb0f3ee10000000000000000000000000000000000000000000000000000000000000020000000000000000000000000c36cf0cfcb5d905b8b513860db0cfe63f6cf9f5c00000000000000000000000000000197000000000000000000000000000000000000000000000000000000000000000000000000000000000000000000000001000000000000000000000000e179b3db9cb6c9e8316c13159535239fbecbcc66000000000000000000000000004c00500000ad104d7dbd00e3ae0a5c00560c0000000…	16113069	0x0ce4b1b24271573a767b18514c46a7aec019fbc3fb4c2dfa34dfc1ccbaa68fbf
470	0x0db8116d8f9078f5e857e4f91bdde5ffd1fd5051a7942b91d533d66c2904f95d	0xf60640fd2ba28dda4227c36652cba5ea8d8dd646	0x561fd1dc45cd0e256ddcd9957e912f79c4f0b71a	3000000000000000	0x	16113069	0x0ce4b1b24271573a767b18514c46a7aec019fbc3fb4c2dfa34dfc1ccbaa68fbf
472	0x527328af2e1480d270ac304102d5a0eec9a9e11525ba482a095edccce2c6e70a	0xf236a74926f65729c9910cb4e64ecadef69a3bcc	0xa07d8a35747350ce5034cdebccdb40395dd5ee5e	4.44e+17	0x	16113069	0x0ce4b1b24271573a767b18514c46a7aec019fbc3fb4c2dfa34dfc1ccbaa68fbf
473	0xffc07d0b469db729c03a22f53efbd25bf511f923d519eac39228b3f1f6c60d20	0x3c2714b19cc07feb1fde1e2674a19d045f02d255	0x8731d54e9d02c286767d56ac03e8037c07e01e98	1580000000000000	0x9fbf10fc000000000000000000000000000000000000000000000000000000000000006f000000000000000000000000000000000000000000000000000000000000000e000000000000000000000000000000000000000000000000000000000000000e0000000000000000000000003c2714b19cc07feb1fde1e2674a19d045f02d2550000000000000000000000000000000000000000000004d5f6a5307dc8c0c0000000000000000000000000000000000000000000000004cfc60d52cf1344e80000000…	16113069	0x0ce4b1b24271573a767b18514c46a7aec019fbc3fb4c2dfa34dfc1ccbaa68fbf
476	0x67916bec4967d820da73de82f7b65373675238fa91dc492ba6ed431be52f4bb9	0x267be1c1d684f78cb4f6a176c4911b741e4ffdc0	0x10d0afff7c560d5b41133fff462f0b4932bd9b94	1.1e+19	0x	16113069	0x0ce4b1b24271573a767b18514c46a7aec019fbc3fb4c2dfa34dfc1ccbaa68fbf
477	0x89b0eb1d93e9a411e8be2c84291e23189d47cbea0395ee1ebea28b25cd41bd5a	0x0d0c5b4bfccacbe1f35ef525cf7436453b37f177	0xdac17f958d2ee523a2206206994597c13d831ec7	0	0x095ea7b3000000000000000000000000881d40237659c251811cec9c364ef91dc08d300cffffffffffffffffffffffffffffffffffffffffffffffffffffffffffffffff	16113069	0x0ce4b1b24271573a767b18514c46a7aec019fbc3fb4c2dfa34dfc1ccbaa68fbf
478	0x5929c4793b6d1960f73fb277cecb21895ece565c1babd5e4bb8a23832517b915	0x1be210e7990eff6c07cb8cadcb9d077063ac3614	0x20c5c464e3281a58f18719af306cc23d5b36ca67	2100000000000000	0x	16113069	0x0ce4b1b24271573a767b18514c46a7aec019fbc3fb4c2dfa34dfc1ccbaa68fbf
481	0xd488b48627cc27f4375240d84a17b91c45686e871cbe0c6142b10da06cc05189	0x8a23155cb36e2bd4bf230b8e1e792187ebcb7580	0x283af0b28c62c092c9727f1ee09c02ca627eb7f5	4.29e+16	0xf7a1696300000000000000000000000000000000000000000000000000000000000000c00000000000000000000000008a23155cb36e2bd4bf230b8e1e792187ebcb7580000000000000000000000000000000000000000000000000000000000024effdd006999ca7c9ca6d911472a072b176e3ae222a1e280431c49395778f333a09300000000000000000000000004976fb03c32e5b8cfe2b6ccb31c09ba78ebaba410000000000000000000000008a23155cb36e2bd4bf230b8e1e792187ebcb758000000…	16113069	0x0ce4b1b24271573a767b18514c46a7aec019fbc3fb4c2dfa34dfc1ccbaa68fbf
482	0xbb100a8157f07af8e95dcdd543b6c1fd3a40301bfe8b2e97332f8554bb0888b5	0x89cd03fc77641a1772960e35a0aed25e7d4bb89c	0x8e8f404616c22d2a11ce61b9837e0cb53241fbcb	2000000000000000	0xa0712d680000000000000000000000000000000000000000000000000000000000000002	16113069	0x0ce4b1b24271573a767b18514c46a7aec019fbc3fb4c2dfa34dfc1ccbaa68fbf
483	0x31f6835d2660564a99a40a9bbf119c6e1a20a689c94699438e48bb443fd1d9dd	0x129c24df1bd82bc2ce9f461063af011662926ba5	0x945bb0b04ab5da082097301d447dc37ecfa69dd3	3000000000000000	0x	16113069	0x0ce4b1b24271573a767b18514c46a7aec019fbc3fb4c2dfa34dfc1ccbaa68fbf
484	0x9e1808daddce2d00836dbb15483a42e73ca76a21df547ac89f02835f6f5777c3	0x4976a4a02f38326660d17bf34b431dc6e2eb2327	0x110928e6e9a84a9c28844a76bb688d710432e918	1.1e+16	0x	16113069	0x0ce4b1b24271573a767b18514c46a7aec019fbc3fb4c2dfa34dfc1ccbaa68fbf
485	0x8ca0d3fcf103be1f8c4fb68c04b7a19429a892e0254599433eb7f62ab9d05fe0	0xed9c9a1afc22db5604e69f17dbeb8be786f36f39	0xd9dab6e0dd1f2c1463eb0f93f8563360316fa1c8	5000000000000000	0x	16113069	0x0ce4b1b24271573a767b18514c46a7aec019fbc3fb4c2dfa34dfc1ccbaa68fbf
490	0x3f5319ee0fa23a23d3fb2d8c5e6d91cfa3ab4480c11cae22ceb6accd63ceca31	0x17f1a51da68d27c94d2a51d92b27b5bd4718b986	0xdac17f958d2ee523a2206206994597c13d831ec7	0	0xa9059cbb0000000000000000000000007650195769de861a2d50c28ee2e48249d97995d10000000000000000000000000000000000000000000000000000000007d4193d	16113069	0x0ce4b1b24271573a767b18514c46a7aec019fbc3fb4c2dfa34dfc1ccbaa68fbf
498	0x6f0331b6868d67f810f52391497f3bcb50a1b8994b0f4b81a60d5f92d5498cd8	0xd65e0cbd31977b2e0e23c8330c8b5f020818fc91	0xf8b84b82ca1b1e626afecde05fb241c7cc8635d9	4.75e+16	0x	16113069	0x0ce4b1b24271573a767b18514c46a7aec019fbc3fb4c2dfa34dfc1ccbaa68fbf
499	0x7aa914f64657b53cd47b6e99fc22ab5b7ce40feda97184097c359b89e61922e4	0xa1920c6993022b0db795dc3a90538d4ec60d4e52	0x1111111254fb6c44bac0bed2854e76f90643097d	1.74e+17	0xe449022e00000000000000000000000000000000000000000000000002688ee86bb8a7fc000000000000000000000000000000000000000000000000000000000cc9c2c00000000000000000000000000000000000000000000000000000000000000060000000000000000000000000000000000000000000000000000000000000000140000000000000000000000011b815efb8f581194ae79006d24e0d814b7697f60bd34b36	16113069	0x0ce4b1b24271573a767b18514c46a7aec019fbc3fb4c2dfa34dfc1ccbaa68fbf
500	0xcb3f3b05273825845c9d6b55041b71aedcee4e9ac06acf5199d3a447a232ccfd	0x1a8ed0d3ad42c9019cc141aace7e5fb6e576b917	0x5a54fe5234e811466d5366846283323c954310b2	0	0x46f83b50000000000000000000000000000000000000000000000000000000000000006ec59815a1f0fbec4bf2c2d63aaec05a630d9b147bb7e96af24e7b066db9f92e4800000000000000000000000000000000000000000000000000000000000000146798ba1b1aae7584f53916a1926177a694d53d9f6ac039122fc00d1e28889ce3	16113069	0x0ce4b1b24271573a767b18514c46a7aec019fbc3fb4c2dfa34dfc1ccbaa68fbf
502	0x91bbb934264c4ced579ebc3b20783d66fec0767960442fcd6509235b5e0903a9	0x1be210e7990eff6c07cb8cadcb9d077063ac3614	0x18c8c0f7db91afb4b4206b9477e2cd6c2fad4c3a	2100000000000000	0x	16113069	0x0ce4b1b24271573a767b18514c46a7aec019fbc3fb4c2dfa34dfc1ccbaa68fbf
503	0xb29c6eb349066a7bb60a8b511f17139eed09e185fa4c55ba354267eb9415c129	0x8989a26d82c14fc96e8c2abf3e8d60fc3c3f5eb3	0xeeeec6476073778077b40a73fe32e23a9876cab4	7.94e+16	0x2b66d72e000000000000000000000000000000000000000000000000000000000000002000000000000000000000000000000000000000000000000000000000000000ea65794a68624763694f694a46557a49314e694973496d74705a434936496a64684e6a526c5a6d51314c544a694e4463744e475a6a5a6931684f4463784c5445785a6d59354f5451345954646a4f434a392e436751784d6a553545674e56553051614a44566c4e444d774e5759344c545a6c4f5749744e4451324e7930354d6d4d314c5…	16113069	0x0ce4b1b24271573a767b18514c46a7aec019fbc3fb4c2dfa34dfc1ccbaa68fbf
504	0xab6f0aee69e4a1767c871a851808ff1605eb788697b298ee0a436ed208557c76	0x97f15992362ad414df765a53d66df9b3d7da8b7c	0x2893d2045a136e8cafa521425ce8349a0d3e1de3	3.24e+16	0x	16113069	0x0ce4b1b24271573a767b18514c46a7aec019fbc3fb4c2dfa34dfc1ccbaa68fbf
505	0x7d17e1ff5b1070cb6f12fcf8904c9185cf8c6e5ef240acbb2e31e66d17cf67af	0x1be210e7990eff6c07cb8cadcb9d077063ac3614	0xa5fc59ebc3e1bb7eb51b8a466414997ee6808ed0	2100000000000000	0x	16113069	0x0ce4b1b24271573a767b18514c46a7aec019fbc3fb4c2dfa34dfc1ccbaa68fbf
508	0x3f927b3b8d304040d4fb183c2880ea327881cf47119294de356f88c61e690dd1	0x4e5b2e1dc63f6b91cb6cd759936495434c7e972f	0xdac17f958d2ee523a2206206994597c13d831ec7	0	0xa9059cbb0000000000000000000000008ec9af9fcc6c522167db224e7946ab594a3753170000000000000000000000000000000000000000000000000000000094321858	16113069	0x0ce4b1b24271573a767b18514c46a7aec019fbc3fb4c2dfa34dfc1ccbaa68fbf
509	0xfbde2cce12276e9ca9f32ccea6aaa251e6b25e03664c9943cc4095c83839cd8c	0x0acdd0fefb605957dfcba4816d77c43dec3f1f79	0x586ebc55340ed3f73f5156f881bef9f66cb8e245	3000000000000000	0x	16113069	0x0ce4b1b24271573a767b18514c46a7aec019fbc3fb4c2dfa34dfc1ccbaa68fbf
510	0x043123c175e068135762fb0638ee76227ea91bf74e0e55d924c0397bd8e1ca57	0x7cab69934e9b42f7516cbda67d9e85bb802e0086	0x76f4eed9fe41262669d0250b2a97db79712ad855	0	0xf17a454600000000000000000000000000000000000000000000000000000000000000c000000000000000000000000000000000000000000000000000000000000001a00000000000000000000000000000000000000000000000000000000c67717cde0000000000000000000000000000000000000000000000000000000c644493040000000000000000000000001d64fb0ffa8362b2e1ee7ee03929159551eab26e000000000000000000000000000000000000000000000000000000000000022000000…	16113069	0x0ce4b1b24271573a767b18514c46a7aec019fbc3fb4c2dfa34dfc1ccbaa68fbf
513	0xed0addb92308ea0fb4c8478eca6bc0f9d14d274fa2d1361647c306a14ec206fa	0xd99d47d8c69a86174d4f90cfd472a68b643f4414	0x86889c63e8bb5a006dd0345ec3ee267696edc5e9	9060000000000000	0x	16113069	0x0ce4b1b24271573a767b18514c46a7aec019fbc3fb4c2dfa34dfc1ccbaa68fbf
516	0xcbc4f9e577a2450626c94005adddfad02fcd0b03cd01d98a31d496fa99e2cd09	0x1be210e7990eff6c07cb8cadcb9d077063ac3614	0x825f40f12c581d6c94caacc51c2255db77a0116c	2100000000000000	0x	16113069	0x0ce4b1b24271573a767b18514c46a7aec019fbc3fb4c2dfa34dfc1ccbaa68fbf
517	0x1399354fd76bd892869566383fed2e51043698a8a4c7e8a4f12d7310b8fb7025	0x8cde74df83bf46c5d410f0938bc51ba54554b61f	0xa18d833b4ab501bd82f29af079a2339e94c7fba3	2000000000000000	0x	16113069	0x0ce4b1b24271573a767b18514c46a7aec019fbc3fb4c2dfa34dfc1ccbaa68fbf
518	0x4f2db8c6399083c6fcea9484d86fad6dbb69b683a8b4da6c2faf2fa12d3057d7	0xaf83d2274120adbfd70b450654953405ab1636d2	0x4afb7d3976b00ed3ee0cceafda350a6d5a32c646	4760000000000000	0x	16113069	0x0ce4b1b24271573a767b18514c46a7aec019fbc3fb4c2dfa34dfc1ccbaa68fbf
519	0x40cc83edc8e7e9d36df00bb955eb7c5828f7cfd03276f2dcbc46a503ceaa8225	0xc70acd4b11fb3f4563b31a084fb7a6dd321b0272	0x7a250d5630b4cf539739df2c5dacb4c659f2488d	0	0x18cbafe5000000000000000000000000000000000000000000000000000007a89224f62e0000000000000000000000000000000000000000000000000729d1550219698000000000000000000000000000000000000000000000000000000000000000a0000000000000000000000000c70acd4b11fb3f4563b31a084fb7a6dd321b027200000000000000000000000000000000000000000000000000000000638cdf59000000000000000000000000000000000000000000000000000000000000000200000…	16113069	0x0ce4b1b24271573a767b18514c46a7aec019fbc3fb4c2dfa34dfc1ccbaa68fbf
520	0x11c716de800e6393f71011809272f6ae9ceca91217bfb6e702f730a536768dcf	0x2db1d8cdf1abe8c70b531a790cdf2ff38aecf652	0x22e2bca2891ea65fb3158a0dc6077c46f437e857	3.79e+16	0x	16113069	0x0ce4b1b24271573a767b18514c46a7aec019fbc3fb4c2dfa34dfc1ccbaa68fbf
521	0x2351c079e473618a8ee8d061c56164e99c8eb30e9767bf82c050852ad7595002	0x473300df21d047806a082244b417f96b32f13a33	0xbe5dab4a2e9cd0f27300db4ab94bee3a233aeb19	0	0x8ca5cbb900000000000000000000000000000000000000000000000000000000000000400000000000000000000000000000000000000000000000000000000002b47a7200000000000000000000000000000000000000000000000000000000000003cb97e4f9c30a2bee971e46bfd877cac6a6a3abea5ab00f6c9281e5339b637a758abe5f40220f1105d4c5fd1f17fcdf0a4fd3879fb79eb9ba8bcc6e6f74df9b13d8b862f5955542b9637a1328e5c63bc1f3a8d059baad5eea69117f3edd11d1c109f8acb…
522	0x93c85b752f9fced718a64b4c826d3b38503ebf68ec4ae0074d66781f7baad08b	0xbbe2374679b45a6ffd3cbd9bbca9719c34708ef4	0x2b591e99afe9f32eaa6214f7b7629768c40eeb39	0	0x52a438b80000000000000000000000000000000000000000000000000000000ba43b74000000000000000000000000000000000000000000000000000000000000001563	16113069	0x0ce4b1b24271573a767b18514c46a7aec019fbc3fb4c2dfa34dfc1ccbaa68fbf
524	0x36b24d5ccdc97c3ed547af7e8f7423933c983a1595916e19ab9789402e50ce5b	0x428ab2ba90eba0a4be7af34c9ac451ab061ac010	0x4d9079bb4165aeb4084c526a32695dcfd2f77381	0	0xac9650d8000000000000000000000000000000000000000000000000000000000000002000000000000000000000000000000000000000000000000000000000000000010000000000000000000000000000000000000000000000000000000000000020000000000000000000000000000000000000000000000000000000000000014489a153cc000000000000000000000000763a7cdd10f0e6eb533ba7101168fc111797bf44000000000000000000000000763a7cdd10f0e6eb533ba7101168fc111797b…	16113069	0x0ce4b1b24271573a767b18514c46a7aec019fbc3fb4c2dfa34dfc1ccbaa68fbf
526	0x12935cff9de07afa826494af7ea9c160a8a078f5d76f2625ce714c9f2a63d193	0x292f04a44506c2fd49bac032e1ca148c35a478c8	0xa0b86991c6218b36c1d19d4a2e9eb0ce3606eb48	0	0xa9059cbb000000000000000000000000e119aa8789bb7b5447017f0ca63c956c7508a9da0000000000000000000000000000000000000000000000000000000059682f00	16113069	0x0ce4b1b24271573a767b18514c46a7aec019fbc3fb4c2dfa34dfc1ccbaa68fbf
529	0x839b6f851fa3370169b60cdecac9cfea505052e3aeb9e6a1627df2f6befae89f	0xde39c07abb2c907822c8a0a94ca77a7b03a85b6f	0x00000000006c3852cbef3e08e8df289169ede581	0	0xe7acab24000000000000000000000000000000000000000000000000000000000000008000000000000000000000000000000000000000000000000000000000000006600000007b02230091a7ed01230072f7006a004d60a8d4e71d599b8104250f0000000000000000000000000000000000000000000000000000000000000000000000000000000000000000000000000000000000000000000000000000000000a0000000000000000000000000000000000000000000000000000000000000000100000…	16113069	0x0ce4b1b24271573a767b18514c46a7aec019fbc3fb4c2dfa34dfc1ccbaa68fbf
530	0x217ccd982ac5316312225e85d42713deb06c14376cc28ffb19ad1effbb7272d6	0x1be210e7990eff6c07cb8cadcb9d077063ac3614	0xffd4aa031959c3e0a7158eec36e3530e7b9a9c44	2100000000000000	0x	16113069	0x0ce4b1b24271573a767b18514c46a7aec019fbc3fb4c2dfa34dfc1ccbaa68fbf
531	0xcda4479ccba19317fab6899514045335dbb1c121f26b1c866ce8d3faf3cdbfdc	0x28c6c06298d514db089934071355e5743bf21d60	0x95ad61b0a150d79219dcf64e1e6cc01f0b64c4ce	0	0xa9059cbb00000000000000000000000095723fd89ac4c949d3cbf4fa66e2dd6e400515a200000000000000000000000000000000000000000006a94f81653cc7ae030000	16113069	0x0ce4b1b24271573a767b18514c46a7aec019fbc3fb4c2dfa34dfc1ccbaa68fbf
535	0x40a8465d18fa16e3b91c4df4bcc11066e909e4bcb1bb33c2fa6e6fd60c4b2fe8	0x1be210e7990eff6c07cb8cadcb9d077063ac3614	0x50b9bf19238d0084d9ad3d72cdc16af1b3667cc4	2100000000000000	0x	16113069	0x0ce4b1b24271573a767b18514c46a7aec019fbc3fb4c2dfa34dfc1ccbaa68fbf
536	0x7dd4a4476d3b4abcbebeb9f9eff6efa6f222bc2792061a29dfe4eebf4e26c2da	0x5041ed759dd4afc3a72b8192c143f72f4724081a	0xdac17f958d2ee523a2206206994597c13d831ec7	0	0xa9059cbb000000000000000000000000f25036189db5db552c21e533d1f9570debb50fec00000000000000000000000000000000000000000000000000000004fb8a1600	16113069	0x0ce4b1b24271573a767b18514c46a7aec019fbc3fb4c2dfa34dfc1ccbaa68fbf
537	0xa82c445ae7f40326a68c07dd17340203ee890e67c531225d14a8154b144db28e	0x1be210e7990eff6c07cb8cadcb9d077063ac3614	0xa867d19bd2b13bbf87586b444a5992dd305a793d	2100000000000000	0x	16113069	0x0ce4b1b24271573a767b18514c46a7aec019fbc3fb4c2dfa34dfc1ccbaa68fbf
539	0xd198fad50ec75db36a3f6d9ce8f75dc66332cf5e12d869c92cce606043fab8c9	0xd0230d9d763a6139ac94eca0ddce82da381a9791	0x68b3465833fb72a70ecdf485e0e4c7bd8665fc45	8e+16	0x5ae401dc00000000000000000000000000000000000000000000000000000000638ce5fb00000000000000000000000000000000000000000000000000000000000000400000000000000000000000000000000000000000000000000000000000000001000000000000000000000000000000000000000000000000000000000000002000000000000000000000000000000000000000000000000000000000000000e4472b43f3000000000000000000000000000000000000000000000000011c37937e080…	16113069	0x0ce4b1b24271573a767b18514c46a7aec019fbc3fb4c2dfa34dfc1ccbaa68fbf
540	0x7b85c676fdc66dc20bd378c11750313d0e22e74956419ec1eb3d1c197562ccba	0x6081258689a75d253d87ce902a8de3887239fe80	0xbbf3190233deb41424096fd55344d9aef9c80664	2.42e+16	0x	16113069	0x0ce4b1b24271573a767b18514c46a7aec019fbc3fb4c2dfa34dfc1ccbaa68fbf
541	0x9d142b5f26e4d05d1709f25411514cbf042c289ad883241816b5874dca12b139	0x88dcdd4a0a58b7e2208805d547043c37dca2b6dc	0x4585e57f4c24f31c1c06f8126b3d48f743212674	2.32e+17	0x	16113069	0x0ce4b1b24271573a767b18514c46a7aec019fbc3fb4c2dfa34dfc1ccbaa68fbf
544	0x1bd6c9b2f276d8e1a8a2f85c698efad0ce98f83f49eb28ebe0469a30f70482ae	0x28c6c06298d514db089934071355e5743bf21d60	0x74714decd39bf3b78d8acc3a502cfe92da1417dc	1.79e+17	0x	16113069	0x0ce4b1b24271573a767b18514c46a7aec019fbc3fb4c2dfa34dfc1ccbaa68fbf
545	0x0f69e0379581bd1e35762453422476e7289c2024cd98e28353e64b66c1bc62f9	0x9696f59e4d72e237be84ffd425dcad154bf96976	0xbe8227910416e76fe90a8de996b6cd22577537d7	2.32e+18	0x	16113069	0x0ce4b1b24271573a767b18514c46a7aec019fbc3fb4c2dfa34dfc1ccbaa68fbf
546	0x892026a08972e1ade510f79cab9e7bcec0bd64287baee3aa3adf0e68a632d290	0x56eddb7aa87536c09ccc2793473599fd21a8b17f	0xdb69c856f1b833177268307693144c68ed3e6164	1.1e+16	0x	16113069	0x0ce4b1b24271573a767b18514c46a7aec019fbc3fb4c2dfa34dfc1ccbaa68fbf
547	0xb76bd528d02a94eff1aed954280eea883ec995e5af310f850b31375d0e40d9dd	0x1be210e7990eff6c07cb8cadcb9d077063ac3614	0x28e67dcd6b711d971bec9711ecf3f1f8324d2634	2100000000000000	0x	16113069	0x0ce4b1b24271573a767b18514c46a7aec019fbc3fb4c2dfa34dfc1ccbaa68fbf
550	0xda2cb97fb14f5e9727a0a472777ad72290689d66e847e6b638551e4bb18213be	0xdb2f75e3b160d1b468f486c0f7b683b9c08b5315	0xdac17f958d2ee523a2206206994597c13d831ec7	0	0xa9059cbb000000000000000000000000fe11f7b333b4d6c4004c3e322ed68fa898b7a268000000000000000000000000000000000000000000000000000000000636de1c	16113069	0x0ce4b1b24271573a767b18514c46a7aec019fbc3fb4c2dfa34dfc1ccbaa68fbf
555	0xebd810068b9c1f14aa63643f37125cd0c46345e81f3d3131a4f831d25fc552e6	0x2ae8f139d31d4b6f2ff745dc83dfcb5a67fe4816	0x00000000006c3852cbef3e08e8df289169ede581	0	0xfd9f1e100000000000000000000000000000000000000000000000000000000000000020000000000000000000000000000000000000000000000000000000000000000100000000000000000000000000000000000000000000000000000000000000200000000000000000000000002ae8f139d31d4b6f2ff745dc83dfcb5a67fe4816000000000000000000000000004c00500000ad104d7dbd00e3ae0a5c00560c00000000000000000000000000000000000000000000000000000000000000016000000…	16113069	0x0ce4b1b24271573a767b18514c46a7aec019fbc3fb4c2dfa34dfc1ccbaa68fbf
556	0x31cc6eb7fd0fe31d871f6655aa8c7e7fefdb30177b3bd871544ef2bd04e5a4b5	0xb0863870f544bde34a310d12a258aa41da52a5aa	0x68b3465833fb72a70ecdf485e0e4c7bd8665fc45	0	0x5ae401dc00000000000000000000000000000000000000000000000000000000638ce607000000000000000000000000000000000000000000000000000000000000004000000000000000000000000000000000000000000000000000000000000000020000000000000000000000000000000000000000000000000000000000000040000000000000000000000000000000000000000000000000000000000000014000000000000000000000000000000000000000000000000000000000000000c4f3995…	16113069	0x0ce4b1b24271573a767b18514c46a7aec019fbc3fb4c2dfa34dfc1ccbaa68fbf
557	0x9534f9b253b2f3dac488f38bfa00770dbc60ddc013f85315c89e450ba7fe930d	0xdfd5293d8e347dfe59e90efd55b2956a1343963d	0xe1942fb34dace8f768b213150bf81e007c015a71	5.44e+17	0x	16113069	0x0ce4b1b24271573a767b18514c46a7aec019fbc3fb4c2dfa34dfc1ccbaa68fbf
560	0xca2ff1e42f7b157f1385d77a29780f35d4a7df3d687c483ad6a1aab3171e2c46	0xff245636b1cc4a12fa77b4ca8e6438f87d3b793d	0x76f4eed9fe41262669d0250b2a97db79712ad855	0	0xf17a454600000000000000000000000000000000000000000000000000000000000000c000000000000000000000000000000000000000000000000000000000000001a0000000000000000000000000000000000000000000000230a9cce5969a0b800000000000000000000000000000000000000000000000022b0e809b9cc695a0000000000000000000000000001d64fb0ffa8362b2e1ee7ee03929159551eab26e000000000000000000000000000000000000000000000000000000000000022000000…	16113069	0x0ce4b1b24271573a767b18514c46a7aec019fbc3fb4c2dfa34dfc1ccbaa68fbf
561	0x01134490f7a1a39248d14734f7cdecb3d2e32b2e989f29fb9f9f63d50f54a47a	0xe2b8e342cc796c7757af4458b152e751af829d9f		0	0x60806040526040518060400160405280600281526020017f41490000000000000000000000000000000000000000000000000000000000008152506001908051906020019062000051929190620003e9565b506040518060400160405280600281526020017f4149000000000000000000000000000000000000000000000000000000000000815250600290805190602001906200009f929190620003e9565b506009600360006101000a81548160ff021916908360ff16021790555060036009556003600a5…	16113069	0x0ce4b1b24271573a767b18514c46a7aec019fbc3fb4c2dfa34dfc1ccbaa68fbf
563	0x33b93bbd3ee75d08c39f87ceea432ae12a172502d2e6c6ae1f279b43abe425d7	0x2b95620d41d5488d1018350c562b52622e68f0a5	0xd93206bd0062cc054e397ecccdb8436c3fa5700e	0	0xa22cb46500000000000000000000000000000000000111abe46ff893f3b2fdf1f759a8a80000000000000000000000000000000000000000000000000000000000000001	16113069	0x0ce4b1b24271573a767b18514c46a7aec019fbc3fb4c2dfa34dfc1ccbaa68fbf
565	0xa4a65d1e3d96369371f0a1d9b027ddc7f5990319ee83ac1a437f95cab29f1b92	0xdfd5293d8e347dfe59e90efd55b2956a1343963d	0xdac17f958d2ee523a2206206994597c13d831ec7	0	0xa9059cbb000000000000000000000000fa0b94c305111446b88313c261dbbf0dde065a480000000000000000000000000000000000000000000000000000000002ca1c80	16113069	0x0ce4b1b24271573a767b18514c46a7aec019fbc3fb4c2dfa34dfc1ccbaa68fbf
567	0xc279c4afaf7c942b8e5e21827252c3619c408633f9791fc9fb22c31ca04845b5	0x72c33c85107685728da420ca77e390aa0a07d681	0x084b1c3c81545d370f3634392de611caabff8148	0	0xc47f00270000000000000000000000000000000000000000000000000000000000000020000000000000000000000000000000000000000000000000000000000000000962657664612e6574680000000000000000000000000000000000000000000000	16113069	0x0ce4b1b24271573a767b18514c46a7aec019fbc3fb4c2dfa34dfc1ccbaa68fbf
569	0x85c622d79b9edf0543ad31680a54a111c90eb0cf358276d5b330263254581706	0x9a16f24a9609a066c4ed3a00d9e7c6944c627684	0xe433e90c5b898819544346e73a501d9e8013dbd8	0	0xa22cb4650000000000000000000000001e0049783f008a0085193e00003d00cd54003c710000000000000000000000000000000000000000000000000000000000000001	16113069	0x0ce4b1b24271573a767b18514c46a7aec019fbc3fb4c2dfa34dfc1ccbaa68fbf
571	0xdc14893245cffd2aed0f28ed20aef9846e07a9d6c062b4718a42334d889a026c	0xfbb4ebfb85ffffa2b5e52d740e040651dcf21b86	0x4dbd4fc535ac27206064b68ffcf827b0a60bab3f	7.1e+17	0x439370b1	16113069	0x0ce4b1b24271573a767b18514c46a7aec019fbc3fb4c2dfa34dfc1ccbaa68fbf
574	0x182445748795f6fe9b43196d92832cc46d3b609c10ebd4c3a4e1698134094333	0x66b916954cfc395d3491f1f3c43c93988c68169a	0x76f4eed9fe41262669d0250b2a97db79712ad855	0	0xf17a454600000000000000000000000000000000000000000000000000000000000000c000000000000000000000000000000000000000000000000000000000000001a00000000000000000000000000000000000000000000000000a1d70244bfa95680000000000000000000000000000000000000000000000000a038b2e2c7fc1fe0000000000000000000000001d64fb0ffa8362b2e1ee7ee03929159551eab26e000000000000000000000000000000000000000000000000000000000000022000000…	16113069	0x0ce4b1b24271573a767b18514c46a7aec019fbc3fb4c2dfa34dfc1ccbaa68fbf
575	0x25eef85202c7bd58ed97fadca7ca62e41bf788f2a9736e52ee077149e8387d2f	0x9a0abcd57493935a1fd880b157a0f9784471ba89	0xeeeec6476073778077b40a73fe32e23a9876cab4	7.94e+16	0x2b66d72e000000000000000000000000000000000000000000000000000000000000002000000000000000000000000000000000000000000000000000000000000000ea65794a68624763694f694a46557a49314e694973496d74705a434936496a64684e6a526c5a6d51314c544a694e4463744e475a6a5a6931684f4463784c5445785a6d59354f5451345954646a4f434a392e436751784d6a553545674e56553051614a445a6c595755314d44566b4c544a69595459744e4456685a6930344f57526a4c5…	16113068	0xb451fb5916693a3707a654afe205186f11a73f85e790ea8e26707fd1115df079
576	0x17ce986a0e61ea551dc2db18892fd751a06aa9c1563fc3bd651e5032b6a37d85	0x2a9262cd2e9d20cc4386ffd9e4d6ca5c492833f1	0x76f4eed9fe41262669d0250b2a97db79712ad855	0	0xf17a454600000000000000000000000000000000000000000000000000000000000000c000000000000000000000000000000000000000000000000000000000000001a0000000000000000000000000000000000000000000000000000000026e1725560000000000000000000000000000000000000000000000000000000267de982a0000000000000000000000001d64fb0ffa8362b2e1ee7ee03929159551eab26e000000000000000000000000000000000000000000000000000000000000022000000…	16113068	0xb451fb5916693a3707a654afe205186f11a73f85e790ea8e26707fd1115df079
578	0x39b5461c002dfacfb98ea158067af3648b44d05fc9a181174cda5fb4396761c2	0x0758e77def8db3e078dd579a2e686a4543e5d6eb	0xc02aaa39b223fe8d0a0e5c4f27ead9083c756cc2	0	0x2e1a7d4d000000000000000000000000000000000000000000000000002d1e952ca5c000	16113068	0xb451fb5916693a3707a654afe205186f11a73f85e790ea8e26707fd1115df079
579	0x3c5fe0d1929323f95ff21932fb870299018d54a3a7845449fab3ba7903f3bc66	0xb590904ef26829cc3ce951784adf2fb2d7faeb2f	0x25553828f22bdd19a20e4f12f052903cb474a335	0	0x791ac94700000000000000000000000000000000000000000007f4a1b99ce208f39cffa1000000000000000000000000000000000000000000000000014a4d9a689da86200000000000000000000000000000000000000000000000000000000000000a0000000000000000000000000b590904ef26829cc3ce951784adf2fb2d7faeb2f00000000000000000000000000000000000000000000000000000000638ce553000000000000000000000000000000000000000000000000000000000000000200000…	16113068	0xb451fb5916693a3707a654afe205186f11a73f85e790ea8e26707fd1115df079
582	0x53765a6eeb9b3ffbbee9c40648cd13650b2c951b710cba54758d730301c6c16f	0x1be210e7990eff6c07cb8cadcb9d077063ac3614	0xb8811c2f73e1ff966eb712974c44bbb89372f5a2	2100000000000000	0x	16113068	0xb451fb5916693a3707a654afe205186f11a73f85e790ea8e26707fd1115df079
583	0x27d39e57f69f03f655236135ab3f6bd7b82a11daf253f2f6f895fc4e5cc8a611	0x45e31174663a986547a9265e2e0f39bea935cf51	0x6c9ce6bdf6d6aeb29a268226566aa464beeab8e7	0	0x7884af4400000000000000000000000045e31174663a986547a9265e2e0f39bea935cf510000000000000000000000000000000000000000000000000000000000000040000000000000000000000000000000000000000000000000000000000000003f68747470733a2f2f617277656176652e6e65742f39315f317a4e7642545047716b536d76626d794d44337474466b687847324a4a4b494f7a384d377876555500	16113068	0xb451fb5916693a3707a654afe205186f11a73f85e790ea8e26707fd1115df079
586	0x11d5fbcdc0f2c199f2b1a1ac6d23796dc00cbe08b3ea899338d4542902f889a7	0xf16e9b0d03470827a95cdfd0cb8a8a3b46969b91	0x4e15361fd6b4bb609fa63c81a2be19d873717870	0	0xa9059cbb0000000000000000000000004a36ccc4d1ad2d096acf089b26a7fc3d7f11348f000000000000000000000000000000000000000000000403810ac798ed544800	16113068	0xb451fb5916693a3707a654afe205186f11a73f85e790ea8e26707fd1115df079
588	0xaedb9bd607a14ab01e14264dad4b1232171c0ef940a0e36a0a00bfc818e2a4e6	0xff245636b1cc4a12fa77b4ca8e6438f87d3b793d	0xa0b86991c6218b36c1d19d4a2e9eb0ce3606eb48	0	0x095ea7b300000000000000000000000076f4eed9fe41262669d0250b2a97db79712ad855ffffffffffffffffffffffffffffffffffffffffffffffffffffffffffffffff	16113068	0xb451fb5916693a3707a654afe205186f11a73f85e790ea8e26707fd1115df079
592	0x93a43f63c49e8b488d02b04f1929ace9534b8cf1593237b01b00d1ba48f49dcc	0x1be210e7990eff6c07cb8cadcb9d077063ac3614	0x62232556cb0546fb788bb0de2a1997dbb8062ec9	2100000000000000	0x	16113068	0xb451fb5916693a3707a654afe205186f11a73f85e790ea8e26707fd1115df079
593	0xdc0483acabd1ebf0bce0f3a885eb4d18270e706586d6014cf7dfd40fabe115fe	0xe68d4c4c2704f601865f1d77b6bf3c1c6eec858f	0xc02aaa39b223fe8d0a0e5c4f27ead9083c756cc2	0	0x2e1a7d4d000000000000000000000000000000000000000000000000002386f26fc10000	16113068	0xb451fb5916693a3707a654afe205186f11a73f85e790ea8e26707fd1115df079
596	0x02c1b28e48ba0924409e5af767db3a833e750070a7578a01ebd28481de6ccb2a	0xebd01b36df9d53ba9e8501aacdf8e3a09385e2dd	0x68b3465833fb72a70ecdf485e0e4c7bd8665fc45	0	0x5ae401dc00000000000000000000000000000000000000000000000000000000638ce607000000000000000000000000000000000000000000000000000000000000004000000000000000000000000000000000000000000000000000000000000000020000000000000000000000000000000000000000000000000000000000000040000000000000000000000000000000000000000000000000000000000000016000000000000000000000000000000000000000000000000000000000000000e4472b4…	16113068	0xb451fb5916693a3707a654afe205186f11a73f85e790ea8e26707fd1115df079
598	0x6f2c3fc1e136e1fda83fd9d891cc1bbe0b769d9ff057b1de413bca4af2f8b76f	0x0124d0fa0dfb1430dfcff16ec6a96945e7a0bc10	0x626c27bcb7739ca923ff1c592dd1efebd4f7c829	0	0xca8bd1f90300010026f22710055475920a8c93cffb64d039a8205f7acc7722d36b175474e89094c44da98b954eedeac495271d0f18000127102710d1ec5e215e8148d76f4460e4097fd3d5ae0a355864aa3364f17a4d01c6f1751fd97c2bd3d7e7f1d514010001f4271060594a405d53811d3bc4766596efd80fd545a270c02aaa39b223fe8d0a0e5c4f27ead9083c756cc20840a361647c4788000a010e2033785d8cb0000000000000	16113068	0xb451fb5916693a3707a654afe205186f11a73f85e790ea8e26707fd1115df079
602	0xcf051b218168daba1e21dbdde66030556f762c7893b1484926183c2d2ab93a6d	0x2ae8f139d31d4b6f2ff745dc83dfcb5a67fe4816	0x00000000006c3852cbef3e08e8df289169ede581	0	0xfd9f1e100000000000000000000000000000000000000000000000000000000000000020000000000000000000000000000000000000000000000000000000000000000100000000000000000000000000000000000000000000000000000000000000200000000000000000000000002ae8f139d31d4b6f2ff745dc83dfcb5a67fe4816000000000000000000000000004c00500000ad104d7dbd00e3ae0a5c00560c00000000000000000000000000000000000000000000000000000000000000016000000…	16113068	0xb451fb5916693a3707a654afe205186f11a73f85e790ea8e26707fd1115df079
603	0x37bdc23dfd8d712a36572778a7d4697d0a7e55410564eac915be73b77ee98f9e	0x6dfc34609a05bc22319fa4cce1d1e2929548c0d7	0xad6d225410d278e36a37f06bd7de63543cc137f5	4.59e+16	0x	16113068	0xb451fb5916693a3707a654afe205186f11a73f85e790ea8e26707fd1115df079
604	0x4b21af4896cbe1b8552403411efbd3d4eb5448002a24af814340a14e7a628839	0xbda43dc50e8c9b8545de53294ac28671b419ca1b	0xe4dd8d2dc7defe3607bfb0a0d9d8c148460a9811	2000000000000000	0xefef39a10000000000000000000000000000000000000000000000000000000000000001	16113068	0xb451fb5916693a3707a654afe205186f11a73f85e790ea8e26707fd1115df079
606	0x2db45abfa7753ed8df7d7ffe6d335cfd063f100aa82cd1007f1560796a541ffc	0x0ab4b2f1a5cf3d72206cc1415b8e88ef9c698423	0x5fdcca53617f4d2b9134b29090c87d01058e27e9	0	0x441a3e7000077fa84d24e06bb4915f8d772484719e10dc7d9002ca784495fad2db00980602705737cd248ac819034b5de474c8f0368224f72a0fda9e031499d519992d9e	16113068	0xb451fb5916693a3707a654afe205186f11a73f85e790ea8e26707fd1115df079
607	0x60b2900d5b27199a843c91143ce9c6d1b47701dea604a32ec7d28eccebad1c61	0xcad621da75a66c7a8f4ff86d30a2bf981bfc8fdd	0xd0eb5ba0a87f5771701b136d2c1ce7e8bf4fb7bc	3.36e+18	0x	16113068	0xb451fb5916693a3707a654afe205186f11a73f85e790ea8e26707fd1115df079
608	0x527a501a5920bdc8904bf8a4b25e5f658a3c1a21b9e2aa432ad8625ece50a6fa	0xf7858da8a6617f7c6d0ff2bcafdb6d2eedf64840	0x779b120aec93e559c04dda65ddbc8dd7cba33286	4.94e+17	0x	16113068	0xb451fb5916693a3707a654afe205186f11a73f85e790ea8e26707fd1115df079
610	0x08e9d7797adc515f6bd9d981455616d1f1b6ed1dc9dca21f9df641156f312a9c	0xf16e9b0d03470827a95cdfd0cb8a8a3b46969b91	0x7d5121505149065b562c789a0145ed750e6e8cdd	0	0xa9059cbb000000000000000000000000627976dbcbb6e96082a886c16926a095182fd93b00000000000000000000000000000000000000000000022706cc2c7f9a428000	16113068	0xb451fb5916693a3707a654afe205186f11a73f85e790ea8e26707fd1115df079
615	0x1935b73351fa0ceb4b24c841815cee1a7fe14591757dd0b298d679a538f92b9f	0xf60640fd2ba28dda4227c36652cba5ea8d8dd646	0xe66cc4e6bae332f211464294242cf48675a06e06	3000000000000000	0x	16113068	0xb451fb5916693a3707a654afe205186f11a73f85e790ea8e26707fd1115df079
616	0xae2accdf0cd22e81821ba4c0e9f5085737b87c8a5b551ff822115baa86def13c	0x28c6c06298d514db089934071355e5743bf21d60	0x18aaa7115705e8be94bffebde57af9bfc265b998	0	0xa9059cbb0000000000000000000000001973ba06dbc27b7f81b6546e9ac293e12edfc545000000000000000000000000000000000000000000000935028bfce421b44000	16113068	0xb451fb5916693a3707a654afe205186f11a73f85e790ea8e26707fd1115df079
617	0x24c1689fa310c8805d07564eba24c9e728fdf3c7b95f760ca537b9109eaafde7	0x3df0eb6dabc4caadc8c786eba1a5b821a12946d1	0x1cea832bd573327beef8cd83cd839aea252f939f	2e+17	0x	16113068	0xb451fb5916693a3707a654afe205186f11a73f85e790ea8e26707fd1115df079
618	0x0b8c7027e1a0ea8edef52ef3eb26f5e6ca50ca9076eba8d8ca06848596bba965	0x1be210e7990eff6c07cb8cadcb9d077063ac3614	0x0d1c492ea16c92608219c3c8f510b720adf1a368	2100000000000000	0x	16113068	0xb451fb5916693a3707a654afe205186f11a73f85e790ea8e26707fd1115df079
620	0x6652f2b6c11405a319be11b5ee7b09d8559829c2d13c218082e6c0953c5f8313	0x982fa4d5f5c8c0063493abe58967ca3b7639f10f	0x37bc7498f4ff12c19678ee8fe19d713b87f6a9e6	0	0xc9807539000000000000000000000000000000000000000000000000000000000000008000000000000000000000000000000000000000000000000000000000000005000000000000000000000000000000000000000000000000000000000000000680010100010000010101000000000000000000000000000000000000000000000000000000000000000000000000000000000000000000000000000000000004600000000000000000000000d02ee3e7b93bbe024d583e46d7fe5445000003a205161a0…	16113068	0xb451fb5916693a3707a654afe205186f11a73f85e790ea8e26707fd1115df079
622	0x4629311f288b2b09dcde9ffcab5467c8f7dbdadfde405b13464b8fae417491ca	0x1be210e7990eff6c07cb8cadcb9d077063ac3614	0x4ae34552d8b7e3c079c5c2be26fec5aed42e64fe	2100000000000000	0x	16113068	0xb451fb5916693a3707a654afe205186f11a73f85e790ea8e26707fd1115df079
623	0x02673effba85776beae9655e923ec000c2f6a8ec22c0d053a5d06848107b52ec	0xf34ac04a28f7cb5324a167c96b24ade9c742b44f	0x86e345d4113e1105053a81240c75b56b437da6ef	0	0xc98075390000000000000000000000000000000000000000000000000000000000000080000000000000000000000000000000000000000000000000000000000000032000000000000000000000000000000000000000000000000000000000000004000101000100010000000000000000000000000000000000000000000000000000000000000000000000000000000000000000000000000000000000000000028000000000000000000000009751b9105a35001e11e9169626bbb9080002a71601020d0…	16113068	0xb451fb5916693a3707a654afe205186f11a73f85e790ea8e26707fd1115df079
624	0x2fa675c09aeb6a8e6310536b1538456ece615ae8b62f75f572387c7c3c13b3de	0x28c6c06298d514db089934071355e5743bf21d60	0xdac17f958d2ee523a2206206994597c13d831ec7	0	0xa9059cbb00000000000000000000000098565c8ad3b261f4e251fa2ce3e2b6c2018f8fed0000000000000000000000000000000000000000000000000000000004385280	16113068	0xb451fb5916693a3707a654afe205186f11a73f85e790ea8e26707fd1115df079
625	0x1257aaf8ce8d717858a8717c43ffe583cc4be60db6deef567d10cce92a9524e8	0x21a31ee1afc51d94c2efccaa2092ad1028285549	0x6c5ba91642f10282b576d91922ae6448c9d52f4e	0	0xa9059cbb00000000000000000000000068de72be1fbbd37ed0f5b3741e99b588a8fe383b00000000000000000000000000000000000000000000001ac724ab811213c000	16113068	0xb451fb5916693a3707a654afe205186f11a73f85e790ea8e26707fd1115df079
627	0xdd82269590d15ad9d22633b4632c450102d3eaca39862d4524693b66931f271c	0xf9cb3669dd3b922ccdeb82918c9f400883fd20c0	0x00000000006c3852cbef3e08e8df289169ede581	2.5e+16	0xfb0f3ee1000000000000000000000000000000000000000000000000000000000000002000000000000000000000000000000000000000000000000000000000000000000000000000000000000000000000000000000000000000000000000000000000000000000000000000000000000000000000000000000000005698eef0667000000000000000000000000000557f5a10d8e637167e6eeb3e9e4baf64da5bb8c5000000000000000000000000004c00500000ad104d7dbd00e3ae0a5c00560c0000000…	16113068	0xb451fb5916693a3707a654afe205186f11a73f85e790ea8e26707fd1115df079
628	0xd4a0b6e5084f5c1c27f6f7c3c40bdd274f2960d0f2908d775311a1cf6fd9d1bd	0x4ad60235be56324b9dc08bb831a202405d47dc30	0xaaecf92bee252ad8a31fdb66aa80e733aa7de609	0	0x0000000000e80000000000000000000000000000000000000018b046fad20b64aa3364f17a4d01c6f1751fd97c2bd3d7e7f1d5055475920a8c93cffb64d039a8205f7acc7722d300000000000000000000000000000000000000000000000036da97b94e9cfc00694104cb9b3ae493f94e71b5c1771d6f310e28a1af8a24d6394d706e3bd60caf77c02aaa39b223fe8d0a0e5c4f27ead9083c756cc20301e4bee12b74093f15a7e3bb5f3348892a9efd24ab4e65bf87b73d0bb86b756d246b175474e89094c44…	16113068	0xb451fb5916693a3707a654afe205186f11a73f85e790ea8e26707fd1115df079
629	0x199d9e0f1fff0d0f73cb94657d630971c7ab53da9dec65b4c3101f4f2846c7a7	0x6887246668a3b87f54deb3b94ba47a6f63f32985	0x5e4e65926ba27467555eb562121fac00d24e9dd2	0	0xd0f893440002b47e120000f50000080000000000000000000000000000000000001300000000638cdee20000f5dd7400002200000000638cdee20000f5dd7500002b00000000638cdef10000f5dd7500002b00000000638cdef10000f5dd7600002300000100638cdf000000f5dd7600003100000000638cdf000000f5dd7800001500000000638cdf0f0000f5dd78789cec7d793c55dbdbf83ec73ccb101922431219521c143266cc9429439932642c32c5310f2165c8585b190a913164261992794c45c6947…
630	0x8831ab6081ce5265e7952d8ca2afde8534c243150fb27947053c9216c30341a7	0x9f64e6a575f50d7c8c5aea4be962f86ee2c5ca31	0x0711a9767a41290d7f52714204618345c584f450	0	0xda7e7c50000000000000000000000000000000000000000000000000000000000000000000000000000000000000000000000000000000000000000000000000000000400000000000000000000000000000000000000000000000000000000000000010c0018061b90c19a6dd01f14641a94e42743f2bad75ce23427139f90824fc22c49e346bff37e02f989475d006413fdda725d34796db022bf2d92468766df78bddbfc39eeb4addb1d1c3c625086416d862c44e06f24e80a840639e7d43d118509e01720…	16113068	0xb451fb5916693a3707a654afe205186f11a73f85e790ea8e26707fd1115df079
632	0x7504cbbab6e4956119f836d9d721148c9f2e8a64591909a4626c0fa8e02542d6	0x21a31ee1afc51d94c2efccaa2092ad1028285549	0x18aaa7115705e8be94bffebde57af9bfc265b998	0	0xa9059cbb000000000000000000000000f9240fdba277555e97f45a7d09f68f6015d321170000000000000000000000000000000000000000000006522776cfd735050000	16113068	0xb451fb5916693a3707a654afe205186f11a73f85e790ea8e26707fd1115df079
635	0x42f26a91cea02e36c28c3dcbb7654b354509af42ae02151ff9694969ed2a2c84	0x56eddb7aa87536c09ccc2793473599fd21a8b17f	0x3a1cb3dcd8da340a4e00949761f82309208e906d	1.18e+18	0x	16113068	0xb451fb5916693a3707a654afe205186f11a73f85e790ea8e26707fd1115df079
638	0x5a514fba9d9122a2f7673ba51d951c293f197b8f5199d26da6ac9582295383b5	0x04ab04d8eb65125f4d3f578bd04588f73c1cc184	0xc02aaa39b223fe8d0a0e5c4f27ead9083c756cc2	0	0x2e1a7d4d000000000000000000000000000000000000000000000000024b82e955585c00	16113068	0xb451fb5916693a3707a654afe205186f11a73f85e790ea8e26707fd1115df079
642	0xdccd6d53f175726617ded36c98e40b37565b3ce0340bbae89c892f6807ee863e	0x8317faab7c2c3fa832dc47c62746af017ccffe21	0x02f74badce458387ecaef9b1f229afb5678e9aad	0	0x42842e0e0000000000000000000000008317faab7c2c3fa832dc47c62746af017ccffe210000000000000000000000006f73c7900d773779d7e4a4cd7ba8c6d0973328ba00000000000000000000000000000000000000000000000000000000000002c1360c6ebe	16113068	0xb451fb5916693a3707a654afe205186f11a73f85e790ea8e26707fd1115df079
644	0x877bdb46e5a6a50f284fdc2b6dac5652d8c28b71903a37240bb013629c1cfd4e	0x2211ed0f73daa4c97b403dd12b7e28da59852dac	0x943319b22490f93555c53f72f3aa9e31219d99f4	4e+19	0x	16113068	0xb451fb5916693a3707a654afe205186f11a73f85e790ea8e26707fd1115df079
649	0x97aac1727eeaa2d97e2d053e4803ddc787b223e58b364e09913480617a35e3e9	0xd24400ae8bfebb18ca49be86258a3c749cf46853	0x46425fd56627ca510f72251d63e883927be3e496	2.55e+18	0x	16113068	0xb451fb5916693a3707a654afe205186f11a73f85e790ea8e26707fd1115df079
651	0xf4ebdf88c229bac49267479027c6de2f7971ec2b7eba9a4ebeeea18b7bd7dd3f	0xdb4cedff26fab59cc4e5cfc8f46e9cd338ee50ba	0x7492e30d60d96c58ed0f0dc2fe536098c620c4c0	0	0xefef39a10000000000000000000000000000000000000000000000000000000000000001	16113068	0xb451fb5916693a3707a654afe205186f11a73f85e790ea8e26707fd1115df079
652	0xe425595c04bfff930ca84b258111bf867c59c2f3054e63d66ba2fb6617018dc9	0x4ed8dc29569d4256653bb151db244661c7f79ae5	0x49642110b712c1fd7261bc074105e9e44676c68f	0	0x095ea7b3000000000000000000000000881d40237659c251811cec9c364ef91dc08d300cffffffffffffffffffffffffffffffffffffffffffffffffffffffffffffffff	16113068	0xb451fb5916693a3707a654afe205186f11a73f85e790ea8e26707fd1115df079
653	0xac137c582c660bcf65f7482abde27bce8488c6c34e7891a464cd51d0eb3a37c7	0x9696f59e4d72e237be84ffd425dcad154bf96976	0x04ba472a110729a9724b3e38ad33e6d1be661b48	1.27e+17	0x	16113068	0xb451fb5916693a3707a654afe205186f11a73f85e790ea8e26707fd1115df079
654	0xd4224ecf762b2c8bbd14a88f492e7a61afafda38fe867ce59b9eaf2673779192	0x80e92642e1160ab71a111bcad5fb63c33cf0df9d	0xb39bae8bc7003bf25b81a03d00006f70b900007c	430311631	0x3d22140392d2e0000000000911b815efb8f581194ae79006d24e0d814b7697f648da0965ab2d2cbf1c17c09cfb5cbe67ad5b1406000000000119c596000000000000055475920a8c93cffb64d039a8205f7acc7722d30000000000000000008b332e0000c45d42f801105e861e86658648e3678ad7aa70f900010000000000000000011e64aa3364f17a4d01c6f1751fd97c2bd3d7e7f1d5	16113068	0xb451fb5916693a3707a654afe205186f11a73f85e790ea8e26707fd1115df079
656	0xbdef1ea21e60bf506ad131f2b65ef62dc9c9ee9ae9b9a08f23690bea46698e63	0x9a81add75e89599ccd31e2129d6df5a0f1778f93	0xdac17f958d2ee523a2206206994597c13d831ec7	0	0xa9059cbb000000000000000000000000facfa81f17de9e367961b7e8fdc93faa23fa69c60000000000000000000000000000000000000000000000000000000002625a00	16113068	0xb451fb5916693a3707a654afe205186f11a73f85e790ea8e26707fd1115df079
657	0x2d293782ffef2993e036e1e1f3b634ca3ba4c1ec280c6dd0defa761e2bfa47bb	0x235d46be238bd8fdd3d20fff883ce69e9fecfcb1	0x7a250d5630b4cf539739df2c5dacb4c659f2488d	2e+18	0x7ff36ab50000000000000000000000000000000000000000d581c72cc4f2ae0deca393760000000000000000000000000000000000000000000000000000000000000080000000000000000000000000aaacb0322dd57dded2ec12929a908b5440388a5400000000000000000000000000000000000000000000000000000000638ce4830000000000000000000000000000000000000000000000000000000000000002000000000000000000000000c02aaa39b223fe8d0a0e5c4f27ead9083c756cc200000…	16113068	0xb451fb5916693a3707a654afe205186f11a73f85e790ea8e26707fd1115df079
658	0xa28b17188631f108afc92849135e3d64ec3c0183d8b474631fb6c353d80c9b35	0xbd9373309ef7ba0ffcd0470e92a3002b20b2c8e6	0x0a19d101e88eec0f18cc27c37812ebfbcb042189	2.74e+17	0x	16113068	0xb451fb5916693a3707a654afe205186f11a73f85e790ea8e26707fd1115df079
660	0xbad7c9026989a926a8a38ddfbc95304a520e58edd9c5551d7ba63aac8880addd	0x28c6c06298d514db089934071355e5743bf21d60	0x4fabb145d64652a948d72533023f6e7a623c7c53	0	0xa9059cbb000000000000000000000000072bfb7fb1e81bdf866662d9f15920bab0f56868000000000000000000000000000000000000000000000002017a67f731740000	16113068	0xb451fb5916693a3707a654afe205186f11a73f85e790ea8e26707fd1115df079
662	0x9e5d88c92e893c61314682c6f73bd2b239c0500b82c0b928f8c5101b82234d1a	0xeae647120c53be5bfb31000218e60a7718a48cb7	0x9b091d2e0bb88ace4fe8f0fab87b93d8ba932ec4	0	0xa22cb46500000000000000000000000000000000000111abe46ff893f3b2fdf1f759a8a80000000000000000000000000000000000000000000000000000000000000001	16113068	0xb451fb5916693a3707a654afe205186f11a73f85e790ea8e26707fd1115df079
666	0x10dd9b3d15200ae771c55825e55c2419689dabf055a34be9042c318ad4e30e7a	0x01a7e0d59a07288fabb63ffa91b597d524e235fc	0x6bb204870617784397da68e46aefa49ebfda5a85	0	0x98a6e993000000000000000000000000000000000000000000000000000000000000004000000000000000000000000000000000000000000000000000000000000001e000000000000000000000000001a7e0d59a07288fabb63ffa91b597d524e235fc00000000000000000000000000000000000000000000000000000000000000000000000000000000000000000000000000000000000000000000000000000000000000000000000000000000000000000000000000000000000000000000000000000…	16113068	0xb451fb5916693a3707a654afe205186f11a73f85e790ea8e26707fd1115df079
667	0x43f523c149204ac7491197ec9c362edd37d5ae5e2f858b4bb94be1c36e199336	0x19f494583c7c933be7b0ee58104ddafac1e8adfa	0xdbd324b73f6f85bf9013b75c442021303b635ff9	1.5e+17	0xa9059cbb000000000000000000000000d7612f93c7a4aed7642b86c354c5d50f34ef237d00000000000000000000000000000000a26246efc6b06c760f3c01cf56b40422	16113068	0xb451fb5916693a3707a654afe205186f11a73f85e790ea8e26707fd1115df079
668	0x7da4350e35c02e8d2c3baff8cbe7378e2a8b84d581fd3a809e5b315f4e0a30eb	0xcad621da75a66c7a8f4ff86d30a2bf981bfc8fdd	0xc53a6fb1a236d90edaf8143c1a8001d954d5ed10	1.09e+18	0x	16113068	0xb451fb5916693a3707a654afe205186f11a73f85e790ea8e26707fd1115df079
670	0x3bc5b623f7eee4d88e5b0a46b5a1bad8d15f2cd5707b8148b38ef18de075fd49	0x916323199e8cc3297b997b927c47467375b50a58	0x68b3465833fb72a70ecdf485e0e4c7bd8665fc45	0	0x5ae401dc00000000000000000000000000000000000000000000000000000000638ce3af0000000000000000000000000000000000000000000000000000000000000040000000000000000000000000000000000000000000000000000000000000000100000000000000000000000000000000000000000000000000000000000000200000000000000000000000000000000000000000000000000000000000000124b858183f0000000000000000000000000000000000000000000000000000000000000…	16113068	0xb451fb5916693a3707a654afe205186f11a73f85e790ea8e26707fd1115df079
671	0x0e6a8d9f000b54fa9a06c7b72a58098a19832c8301554a0888c1ffca6a29bd19	0x1be210e7990eff6c07cb8cadcb9d077063ac3614	0x55e2bd714a080161736faf116316ee8adbf32746	2100000000000000	0x	16113068	0xb451fb5916693a3707a654afe205186f11a73f85e790ea8e26707fd1115df079
675	0x6e47a1848ca7308f2f6db706bc5a2d119a537341467b52e5b8a9374284a03326	0x3d9ec341f38aa8ba66bf2bc6d3f4fb16d468b624	0xc2a54f74ebbbba5ed92d6a0b5dcb0b0ffb96f36e	0	0x8bd8554f00000000000000000000000000000000000000000000000000000000000000c000000000000000000000000000000000000000000000000000000000000001000000000000000000000000000000000000000000000000000000000000000140000000000000000000000000000000000000000000000000000000000000018000000000000000000000000000000000000000000000000000000000000004a000000000000000000000000000000000000000000000000000000000000004c000000…	16113068	0xb451fb5916693a3707a654afe205186f11a73f85e790ea8e26707fd1115df079
676	0x1e3a8b41807d0da2359828d2839c4c39d9589547f621339af6d117747188ae56	0xb14ad49e89eaa9927aee547088f70768c5676e45	0x00000000c2cf7648c169b25ef1c217864bfa38cc	0	0x000000ff0000000000000000000000000000000000000000000000000000000000000020000000000000000000000000000000000000000000000000000000000000019b00000100000000000038e62046fb1a00000306006901c02aaa39b223fe8d0a0e5c4f27ead9083c756cc26b175474e89094c44da98b954eedeac495271d0f60594a405d53811d3bc4766596efd80fd545a27000000000000000000739d9717365cdc000000000010001f4055475920a8c93cffb64d039a8205f7acc7722d300007e010…	16113068	0xb451fb5916693a3707a654afe205186f11a73f85e790ea8e26707fd1115df079
678	0x4cbd0af02f00adfad9ea8bc319d4e3f2bef6fe00543f27b340be664abc1ff5e8	0xe1c2ee26ead49577b6c3cad61efe667cac266e53	0x881d40237659c251811cec9c364ef91dc08d300c	1000000000000000	0x5f5755290000000000000000000000000000000000000000000000000000000000000080000000000000000000000000000000000000000000000000000000000000000000000000000000000000000000000000000000000000000000038d7ea4c6800000000000000000000000000000000000000000000000000000000000000000c000000000000000000000000000000000000000000000000000000000000000147061726173776170563546656544796e616d696300000000000000000000000000000…	16113068	0xb451fb5916693a3707a654afe205186f11a73f85e790ea8e26707fd1115df079
680	0xbcb6c0c0294220f3e2110f6a44e972213f482fed2dc5666ace0b1196bb802b35	0x0f493931981ef166bc2faf0de4324f8a26bad0c2	0x76f4eed9fe41262669d0250b2a97db79712ad855	0	0xf17a454600000000000000000000000000000000000000000000000000000000000000c000000000000000000000000000000000000000000000000000000000000001a00000000000000000000000000000000000000000000000000000000463d877c000000000000000000000000000000000000000000000000000000004589b6c500000000000000000000000001d64fb0ffa8362b2e1ee7ee03929159551eab26e000000000000000000000000000000000000000000000000000000000000022000000…	16113068	0xb451fb5916693a3707a654afe205186f11a73f85e790ea8e26707fd1115df079
682	0xddf49bbe4d74d841a4d92b60e08eb7b7afade3178671099e906a9747685f60d8	0x28e48a0e8b6ebfa3b3a1b7e963e15ce8d98eab42	0x00000000006c3852cbef3e08e8df289169ede581	0	0xe7acab24000000000000000000000000000000000000000000000000000000000000008000000000000000000000000000000000000000000000000000000000000006600000007b02230091a7ed01230072f7006a004d60a8d4e71d599b8104250f0000000000000000000000000000000000000000000000000000000000000000000000000000000000000000000000000000000000000000000000000000000000a0000000000000000000000000000000000000000000000000000000000000000100000…	16113068	0xb451fb5916693a3707a654afe205186f11a73f85e790ea8e26707fd1115df079
683	0xb77be9bf4ff7a1041b7a066d01e49e71013ae7b7733008726a464648da12bf26	0x15652636f3898f550b257b89926d5566821c32e1	0x4d9079bb4165aeb4084c526a32695dcfd2f77381	0	0x89a153cc0000000000000000000000000c0858290b6b268a93fb557af06390a3460c5db60000000000000000000000000f181f35df44c086e7b6158b9731eb24f866dec1000000000000000000000000c02aaa39b223fe8d0a0e5c4f27ead9083c756cc200000000000000000000000000000000000000000000000002386f26fc10000000000000000000000000000000000000000000000000000002386f26fc100000000000000000000000000000000000000000000000000000000000000000000100000…	16113068	0xb451fb5916693a3707a654afe205186f11a73f85e790ea8e26707fd1115df079
685	0x15ffbba097711cc966708e3ba7fba8b27e21e4551b2221ff2003bbf24a881292	0x04cc004b01b7d2cba1f0f47e5af9dfd347128e48	0x6e627f5b398bd40cfcb1b91fd2b11e0b54790865	1990000000000000	0x	16113068	0xb451fb5916693a3707a654afe205186f11a73f85e790ea8e26707fd1115df079
688	0x47b46b7bf948aad77895f2f6d4db08d8c8dd3d50a020fbe834e79f9285adfad1	0xaf423481bb944d161ec44e01c8c2015314ba290b	0xeeeec6476073778077b40a73fe32e23a9876cab4	7.94e+16	0x2b66d72e000000000000000000000000000000000000000000000000000000000000002000000000000000000000000000000000000000000000000000000000000000ea65794a68624763694f694a46557a49314e694973496d74705a434936496a64684e6a526c5a6d51314c544a694e4463744e475a6a5a6931684f4463784c5445785a6d59354f5451345954646a4f434a392e436751784d6a553545674e56553051614a474d324d5463334f4759334c575a6a4f5463744e4751344d7931684d6d59784c5…	16113068	0xb451fb5916693a3707a654afe205186f11a73f85e790ea8e26707fd1115df079
690	0x9fca89c350e09f223ac2f91a880d5f47d3df6aebdf73202b953033b2ea649b23	0x0a690b298f84d12414f5c8db7de1ece5a4605877	0xd9e1ce17f2641f24ae83637ab66a2cca9c378b9f	0	0x38ed17390000000000000000000000000000000000000000000000000000008a277e463c00000000000000000000000000000000000000000000011480f47e081384823c00000000000000000000000000000000000000000000000000000000000000a00000000000000000000000000a690b298f84d12414f5c8db7de1ece5a460587700000000000000000000000000000000000000000000000000000000638ce607000000000000000000000000000000000000000000000000000000000000000200000…	16113068	0xb451fb5916693a3707a654afe205186f11a73f85e790ea8e26707fd1115df079
691	0xe8722b46b95a13aab2c9411a14d27a6d19fb1e606314eeddf1999fecce26147c	0xdcff76ec0615ca94cfe5d8f2cda6377521436ac6	0x2260fac5e5542a773aa44fbcfedf7c193bc2c599	0	0x095ea7b30000000000000000000000001111111254eeb25477b68fb85ed929f73a960582ffffffffffffffffffffffffffffffffffffffffffffffffffffffffffffffff	16113068	0xb451fb5916693a3707a654afe205186f11a73f85e790ea8e26707fd1115df079
692	0xc312435072100404dc818e63efd9a9ca11fc8b93a5382969ce0eea5290e26b79	0x73aa9f1bf613c87b57afcbfdf6a259f9d4578115	0x3819f64f282bf135d62168c1e513280daf905e06	0	0xa9059cbb0000000000000000000000004855e3890449dd5694a94a761fd553c2dd30075700000000000000000000000000000000000000000000000000566b56130b183b	16113068	0xb451fb5916693a3707a654afe205186f11a73f85e790ea8e26707fd1115df079
693	0x958bd5cdb2a86d48578e0c8781c3f2e16cdabe9de6fd144d4c73a5624e24dd65	0x5dad3c6766fdee4418c823b942e8a020ad8a8697	0x881d40237659c251811cec9c364ef91dc08d300c	1e+16	0x5f57552900000000000000000000000000000000000000000000000000000000000000800000000000000000000000000000000000000000000000000000000000000000000000000000000000000000000000000000000000000000002386f26fc1000000000000000000000000000000000000000000000000000000000000000000c00000000000000000000000000000000000000000000000000000000000000017616972737761704c696768743346656544796e616d696300000000000000000000000…	16113068	0xb451fb5916693a3707a654afe205186f11a73f85e790ea8e26707fd1115df079
694	0x7207e68a61ad65833bb2fe4f531bda13a643ad67a4ab6fa9251b314bb73304bd	0x912fd21d7a69678227fe6d08c64222db41477ba0	0x7a4cae432d2bf35e440c5fb972c7dc23f0169d0d	7.48e+16	0x	16113068	0xb451fb5916693a3707a654afe205186f11a73f85e790ea8e26707fd1115df079
695	0xc4b4faab2b513e17dc354b79b18c20d598504800805da277a7d3db6916c4f230	0x22d134a2bf8ed5cae2d331e1f847a639bf4f6922	0xa7aeacaec79484365b7c18b1e38a666925947ef0	5.5e+16	0x	16113068	0xb451fb5916693a3707a654afe205186f11a73f85e790ea8e26707fd1115df079
697	0xa01162da5f01516ec5bd868a16231b7cea1993d30eeace34006da88cf4e83cef	0x0acdd0fefb605957dfcba4816d77c43dec3f1f79	0x00e859d661eff1a426ecc9e3a1128a4ac33eb137	3000000000000000	0x	16113068	0xb451fb5916693a3707a654afe205186f11a73f85e790ea8e26707fd1115df079
699	0x724f1ea54ba0d7bb31012f180bbbfdf95919b27c509a7ae3f5c9f957b91d2995	0x1be210e7990eff6c07cb8cadcb9d077063ac3614	0xc7cd8d4b654c917bb1f742e91baeabf75a921166	2100000000000000	0x	16113068	0xb451fb5916693a3707a654afe205186f11a73f85e790ea8e26707fd1115df079
700	0x3a66555583f3a8fba57c7ab1f4d9f722f591b9cf3a743d824626b2ae06622a54	0xdfd5293d8e347dfe59e90efd55b2956a1343963d	0xdac17f958d2ee523a2206206994597c13d831ec7	0	0xa9059cbb000000000000000000000000a1b098c69a5a4a0636627a2d8423a100eae2ee310000000000000000000000000000000000000000000000000000000053417a00	16113068	0xb451fb5916693a3707a654afe205186f11a73f85e790ea8e26707fd1115df079
701	0xde7c8281e306c00e3fb42d83bac17aa4b9ca15934ad5ba395a0605bd90aa7130	0x4a2ff83715ed538e9634809db9e32dbbbf3e7ff4	0x0b5365167908035b63041da975bd21e2a881aec1	0	0x095ea7b300000000000000000000000068b3465833fb72a70ecdf485e0e4c7bd8665fc45ffffffffffffffffffffffffffffffffffffffffffffffffffffffffffffffff	16113068	0xb451fb5916693a3707a654afe205186f11a73f85e790ea8e26707fd1115df079
702	0x55e7c2d7e056355d16aecfc8718432dda81b45927139bddc2ac07e65920a7985	0x4467b367dafadbe7df9acc14254341741bc09a74	0x39da41747a83aee658334415666f3ef92dd0d541	3.92e+18	0x9a2b81150000000000000000000000000000000000000000000000000000000000000020000000000000000000000000000000000000000000000000000000000000000100000000000000000000000000000000000000000000000000000000000000200000000000000000000000000000000000000000000000000000000000000004000000000000000000000000000000000000000000000000366687f234302000000000000000000000000000000000000000000000000000000000000000006000000…	16113068	0xb451fb5916693a3707a654afe205186f11a73f85e790ea8e26707fd1115df079
703	0xa47ca4c5063ee6ff86a85a7470be8817f3c3f14ba4e1112acb4cb11b7e0258d7	0xcdbadbc6f8b1a90565589c53324093cf504b9d35	0x68b3465833fb72a70ecdf485e0e4c7bd8665fc45	2e+16	0x5ae401dc00000000000000000000000000000000000000000000000000000000638ce60700000000000000000000000000000000000000000000000000000000000000400000000000000000000000000000000000000000000000000000000000000001000000000000000000000000000000000000000000000000000000000000002000000000000000000000000000000000000000000000000000000000000000e4472b43f300000000000000000000000000000000000000000000000000470de4df820…	16113068	0xb451fb5916693a3707a654afe205186f11a73f85e790ea8e26707fd1115df079
705	0xdcd6db5ac38c51bab29fb05e632b3328708372fe0d67669434c68bb7d972e0b5	0x016389f4d75d98dd534eca7b6178acd462f05c96	0xf9459156401e8b81fbf5d34dada2b4f7f63d141e	0	0x3c9c20870000000000000000000000000000000000000000000000000000000000000020000000000000000000000000000000000000000000000000000000000000004b4b6b175474e89094c44da98b954eedeac495271d0f0100000021e044df5e1fc25d951b23595bea1304654b58763b19ebf2aa65c3b102ba05bbb39ff32ca86f084bc482ff9b36c93bd8a203000000000000000000000000000000000000000000	16113068	0xb451fb5916693a3707a654afe205186f11a73f85e790ea8e26707fd1115df079
706	0x2dad31cb08755ef8b459c4b900cebf3dc8413358317c1218b385cb534234cc27	0x911788d9b77f277e0394f0cf0cb5073985a372c0	0x9ade9ea6fd4fca08e27db8d2b607e3e30bcb0ab2	0	0x1b9115470000000000000000000000000000000000000000000000000000000000000f6b	16113068	0xb451fb5916693a3707a654afe205186f11a73f85e790ea8e26707fd1115df079
707	0x91adf504e37735000cca9babdb751adb42caebf6892ab1f71ed3359d8c6cd545	0xd6b1fbcbe39e33a3d5d9014b024f511be3564ee5	0x68b3465833fb72a70ecdf485e0e4c7bd8665fc45	0	0x5ae401dc00000000000000000000000000000000000000000000000000000000638ce38b0000000000000000000000000000000000000000000000000000000000000040000000000000000000000000000000000000000000000000000000000000000100000000000000000000000000000000000000000000000000000000000000200000000000000000000000000000000000000000000000000000000000000124b858183f0000000000000000000000000000000000000000000000000000000000000…	16113068	0xb451fb5916693a3707a654afe205186f11a73f85e790ea8e26707fd1115df079
708	0xdddc601a2e36e77296d76189298138234331e8ef3951acd76cfeb98d767f0175	0x8d89837342e9849a41f42214a3759b5984b6e570	0xe66b31678d6c16e9ebf358268a790b763c133750	0	0x5cf5402600000000000000000000000000000000000000000000000000000000000000c00000000000000000000000001e0b2992079b620aa13a7c2e7c88d2e1e18e46e90000000000000000000000001e0b2992079b620aa13a7c2e7c88d2e1e18e46e90000000000000000000000000000000000000000000000000000dac0c13576a1000000000000000000000000eeeeeeeeeeeeeeeeeeeeeeeeeeeeeeeeeeeeeeee00000000000000000000000000000000000000000000000000000235aa084c3000000…	16113068	0xb451fb5916693a3707a654afe205186f11a73f85e790ea8e26707fd1115df079
711	0xf3d0c18854d10d5107ab1bf6872174c5b1e691ebbb6639ba683a505663ae2ddd	0x28c6c06298d514db089934071355e5743bf21d60	0x0f5d2fb29fb7d3cfee444a200298f468908cc942	0	0xa9059cbb000000000000000000000000919cfa334ff0593427e1628da9412861d51c5742000000000000000000000000000000000000000000000000d9537f079e9e0000	16113068	0xb451fb5916693a3707a654afe205186f11a73f85e790ea8e26707fd1115df079
716	0x9d1a2aebe6d8591f4066ea97d26173d699e83c3590b2332d02c4db743a9b98e2	0x6eab3e5308ec0bfbc6de604671f2eb79dd761983	0x6eab3e5308ec0bfbc6de604671f2eb79dd761983	0	0xddb19c0000000000000000000000000000000000000000000133176407cf7a58bbc65d0c000000000000000000000000000000000000000000000000000000000000000000000000000000000000000000000000000000000000000000000000000000c000000000000000000000000000000000000000000000000000000000638cdf4e0000000000000000000000000000000000000000000000000000000000000000000000000000000000000000000000000000000000000000000000000025d7b200000…	16113068	0xb451fb5916693a3707a654afe205186f11a73f85e790ea8e26707fd1115df079
717	0xe13a9ea41e85aa29cfbf4c3359ab9accfb56865d0b2d569c9ff0e6da62b105b7	0x8d56f551b44a6da6072a9608d63d664ce67681a5	0xaf54ccdcd9cec69b66bc25c26e8cb1dbdbfba101	1.17e+16	0x	16113068	0xb451fb5916693a3707a654afe205186f11a73f85e790ea8e26707fd1115df079
718	0xb6990f2ed4b282c698fe1756369f803b8f71bbf143af6e99294a53f4e01b1999	0x21a31ee1afc51d94c2efccaa2092ad1028285549	0x0818ac0be7cd2c6f406d1534bd70b54abf572b5f	1.37e+17	0x	16113068	0xb451fb5916693a3707a654afe205186f11a73f85e790ea8e26707fd1115df079
720	0xc725979125c3b466a92e05c788c47c8afee289b9789d310d8f8b86e5b0cad677	0xcb17b0dd7832f5257b15109887be5e362c129d1b	0x4e5b2e1dc63f6b91cb6cd759936495434c7e972f	3170000000000000	0x	16113068	0xb451fb5916693a3707a654afe205186f11a73f85e790ea8e26707fd1115df079
722	0xa1e9805e6af9f4c38f0dca46f08408e14f9f5c25d4dcad9fc800717cc6e18b9f	0x4ed8dc29569d4256653bb151db244661c7f79ae5	0x881d40237659c251811cec9c364ef91dc08d300c	0	0x5f575529000000000000000000000000000000000000000000000000000000000000008000000000000000000000000049642110b712c1fd7261bc074105e9e44676c68f0000000000000000000000000000000000000000000000bf0ed2e86086ee895000000000000000000000000000000000000000000000000000000000000000c000000000000000000000000000000000000000000000000000000000000000136f6e65496e6368563446656544796e616d69630000000000000000000000000000000…	16113068	0xb451fb5916693a3707a654afe205186f11a73f85e790ea8e26707fd1115df079
723	0xf2e4e9f99bee0353be8133697a61c7a0675da5be0c98eaa88cede2a75e368fb0	0x9ab788fc71d22ca50c5f3013ede79d31ddc78d9f	0xeeeec6476073778077b40a73fe32e23a9876cab4	7.94e+16	0x2b66d72e000000000000000000000000000000000000000000000000000000000000002000000000000000000000000000000000000000000000000000000000000000ea65794a68624763694f694a46557a49314e694973496d74705a434936496a64684e6a526c5a6d51314c544a694e4463744e475a6a5a6931684f4463784c5445785a6d59354f5451345954646a4f434a392e436751784d6a553545674e56553051614a4745344f44526859575a694c5759304e544d744e47517a4e5331694d44497a4c5…	16113068	0xb451fb5916693a3707a654afe205186f11a73f85e790ea8e26707fd1115df079
724	0xf1fd81c1bde7d2b766444b9c1692f8ee869f87187bc6268c0fd774418b0da5ab	0xb442bbfb831b6dd0b09a41a4a85df905416bceb3	0x5dee81dac424fbdc5daebdbb9cf57ad2ea4ee735	2e+18	0x	16113068	0xb451fb5916693a3707a654afe205186f11a73f85e790ea8e26707fd1115df079
726	0x0dcf2fbba63ee70c4b55b1dd625a3e1d61137022f338831b2860c914d5c90bfb	0xd317a3744f60c5cbcde7c82df90a6513409198a2	0x050dc61dfb867e0fe3cf2948362b6c0f3faf790b	0	0x42842e0e000000000000000000000000d317a3744f60c5cbcde7c82df90a6513409198a20000000000000000000000009d13970101a3d1856a072a5405b71f84515bc36a0000000000000000000000000000000000000000000000000000000000000a9e360c6ebe	16113068	0xb451fb5916693a3707a654afe205186f11a73f85e790ea8e26707fd1115df079
727	0xf39074152f1dca32121a23ca9afacad53bec6d64faa593f431aabff81f7e910d	0x08bf80856d7bf9b1a7b95a8955e8d02136e5914e	0x00000000006c3852cbef3e08e8df289169ede581	1e+16	0xfb0f3ee10000000000000000000000000000000000000000000000000000000000000020000000000000000000000000000000000000000000000000000000000000000000000000000000000000000000000000000000000000000000000000000000000000000000000000000000000000000000000000000000000022a392c68f60000000000000000000000000003adb5d6d1affecc4232053874759a78f54508f8d000000000000000000000000004c00500000ad104d7dbd00e3ae0a5c00560c0000000…	16113068	0xb451fb5916693a3707a654afe205186f11a73f85e790ea8e26707fd1115df079
728	0x1fa6c27bb95c4f9a1b95dff0cbeed99df4630ae544ff118193494075db6833b5	0x213c3278afa84643932ce08bc6feef22da3ff48f	0x8e8f404616c22d2a11ce61b9837e0cb53241fbcb	2000000000000000	0xa0712d680000000000000000000000000000000000000000000000000000000000000002	16113068	0xb451fb5916693a3707a654afe205186f11a73f85e790ea8e26707fd1115df079
729	0x8c95bc9011c5595c42874fb7f611340a5d2ce4046730fdc1f1dc6a574607a3f3	0x97b9d2102a9a65a26e1ee82d59e42d1b73b68689	0xa0b86991c6218b36c1d19d4a2e9eb0ce3606eb48	0	0xa9059cbb0000000000000000000000006a0ad85ed4f13d114e3b6bce2dae4eb35570746d0000000000000000000000000000000000000000000000000000000011e94420	16113068	0xb451fb5916693a3707a654afe205186f11a73f85e790ea8e26707fd1115df079
731	0x88aa6b8ff73a046636283542176ffcd462b6271742c364db060bb4664b3381a5	0x6eab3e5308ec0bfbc6de604671f2eb79dd761983	0x45dc21e62d85a4af8dca2e4be860c7f8c3c06ab8	0	0x4bf52a2e000000000000000000000000000000000000000000000000002386f26fc100000000000000000000000000000000000000000000000000000000000000000000000000000000000000000000000000000000000000000000000000000000008000000000000000000000000000000000000000000000000000000000638cdf4e0000000000000000000000000000000000000000000000000000000000000002000000000000000000000000c02aaa39b223fe8d0a0e5c4f27ead9083c756cc200000…	16113068	0xb451fb5916693a3707a654afe205186f11a73f85e790ea8e26707fd1115df079
732	0xb4c0c243fa508315722a165e500476c6765d956c4a881724c174de185b9db556	0xf16e9b0d03470827a95cdfd0cb8a8a3b46969b91	0xa8b919680258d369114910511cc87595aec0be6d	0	0xa9059cbb0000000000000000000000001b1dd6ceb86f1161cb9bac659a93e83fb0cefc9a000000000000000000000000000000000000000000000005318e501b00638000	16113068	0xb451fb5916693a3707a654afe205186f11a73f85e790ea8e26707fd1115df079
734	0x4415aeaf19fa1485f7a4031e319410abc26cad33b93952da1028fb0800b71180	0xffec0067f5a79cff07527f63d83dd5462ccf8ba4	0xb62132e35a6c13ee1ee0f84dc5d40bad8d815206	0	0xa9059cbb0000000000000000000000009d0e02743e277889d0c85f8712a4f68c0e17c12c00000000000000000000000000000000000000000000010f0cf064dd59200000	16113068	0xb451fb5916693a3707a654afe205186f11a73f85e790ea8e26707fd1115df079
735	0xa78857062739311f3d9e258c7b6aef064e213057d00567b629d24ef5039cd9e8	0xb830b814832e126043247b395e30e889c9bf6937	0x9ea307dc460230e77865206326bad338a3187b9b	0	0x095ea7b300000000000000000000000068b3465833fb72a70ecdf485e0e4c7bd8665fc45ffffffffffffffffffffffffffffffffffffffffffffffffffffffffffffffff	16113068	0xb451fb5916693a3707a654afe205186f11a73f85e790ea8e26707fd1115df079
736	0x4262e592c2c945b6c69f0262e8f7d0140778ef16a63009d25693802fe43a49f0	0x7c2b528838d5c8b676b4a99ee72e20d7a5d62d54	0xdac17f958d2ee523a2206206994597c13d831ec7	0	0x095ea7b300000000000000000000000076f4eed9fe41262669d0250b2a97db79712ad855ffffffffffffffffffffffffffffffffffffffffffffffffffffffffffffffff	16113068	0xb451fb5916693a3707a654afe205186f11a73f85e790ea8e26707fd1115df079
739	0x09c2d0a67571dda6a1e2df1189f8774ceda79fd8f6c7206aaf322c2614c92c9f	0x43a5ed92786f0995e289a68fe8923c22ceea59eb	0x9eed1df86f82fd18a01947712df5e6e60fa372f0	0	0xa22cb4650000000000000000000000001e0049783f008a0085193e00003d00cd54003c710000000000000000000000000000000000000000000000000000000000000001	16113068	0xb451fb5916693a3707a654afe205186f11a73f85e790ea8e26707fd1115df079
740	0x1a637f48d398b625455faaea8018a99e26d5ab6edfcd83edbb85c0ca47266556	0x726914111af99b7af79491292d86ce27ef06f63d	0x68b3465833fb72a70ecdf485e0e4c7bd8665fc45	0	0x5ae401dc00000000000000000000000000000000000000000000000000000000638ce6070000000000000000000000000000000000000000000000000000000000000040000000000000000000000000000000000000000000000000000000000000000300000000000000000000000000000000000000000000000000000000000000600000000000000000000000000000000000000000000000000000000000000160000000000000000000000000000000000000000000000000000000000000028000000…	16113068	0xb451fb5916693a3707a654afe205186f11a73f85e790ea8e26707fd1115df079
741	0x798481585446675e3adf7f4c1c91d9158d7780b2d06f3bd37871972edd189b17	0x1eb8e4fd116d69b7c448cee2fa7ee5a4b4acae65	0x75cda57917e9f73705dc8bcf8a6b2f99adbdc5a5	0	0x2e4dbe8f000000000000000000000000000000000000000000000000000000000000254300000000000000000000000091eeda83433690056e22fe33f0e2ffc754ba107600000000000000000000000000000000000000000000000000000000043b960c000000000000000000000000000000000000000000000000000000000000254300000000000000000000000000000000000000000000000000000000000000a0000000000000000000000000000000000000000000000000000000000000004107fd2…	16113068	0xb451fb5916693a3707a654afe205186f11a73f85e790ea8e26707fd1115df079
742	0xeff665fc69c0f4c43ca56f42692a154f524473e3292443c9acf71025aa45f9eb	0x49a2dcc237a65cc1f412ed47e0594602f6141936	0xc36442b4a4522e871399cd717abdd847ab11fe88	1.74e+18	0xac9650d8000000000000000000000000000000000000000000000000000000000000002000000000000000000000000000000000000000000000000000000000000000020000000000000000000000000000000000000000000000000000000000000040000000000000000000000000000000000000000000000000000000000000014000000000000000000000000000000000000000000000000000000000000000c4219f5d17000000000000000000000000000000000000000000000000000000000005d…	16113068	0xb451fb5916693a3707a654afe205186f11a73f85e790ea8e26707fd1115df079
743	0x9163146c448c55b48a9b94f47ff8b440a7b27df5f83699c72c37baffaf101199	0x3071a7ea001bd3a98060c84e4dca1bfde78e10e6	0xdac17f958d2ee523a2206206994597c13d831ec7	0	0xa9059cbb000000000000000000000000974caa59e49682cda0ad2bbe82983419a2ecc4000000000000000000000000000000000000000000000000000000000129d1f75c	16113068	0xb451fb5916693a3707a654afe205186f11a73f85e790ea8e26707fd1115df079
745	0x3319f2dc2758f1efa09911ee9caf3d4a8c4a2b0b022614fc0a50748b152494ce	0xfbb1b73c4f0bda4f67dca266ce6ef42f520fbb98	0xdbf3aa081df470d5b40a10d278269ff7e3679b98	0	0x6ea056a9000000000000000000000000408e41876cccdc0f92210600ef50372656052a38000000000000000000000000000000000000000000000037669e54ca490d3000	16113068	0xb451fb5916693a3707a654afe205186f11a73f85e790ea8e26707fd1115df079
746	0x8fe231b566b9533c8f12741214be929d08d5d67cd7449a82e33e0b79da739b74	0x1be210e7990eff6c07cb8cadcb9d077063ac3614	0x828c053cd2dc50fd24aa503b275d366431c1f188	2100000000000000	0x	16113068	0xb451fb5916693a3707a654afe205186f11a73f85e790ea8e26707fd1115df079
747	0x01be6c34ceb09c90d376e6a3d728882df1cec27bed9a4ea68153856c46b9ae6a	0xae2d4617c862309a3d75a0ffb358c7a5009c673f	0xa24787320ede4cc19d800bf87b41ab9539c4da9d	0	0xc658695c000000000000000000000000a0b86991c6218b36c1d19d4a2e9eb0ce3606eb48000000000000000000000000bebf1c31e05a62aa8d07003af177f07891889ad70000000000000000000000004019f3e3f2f2b6c4be9419a5f12a1c59c0943db800000000000000000000000000000000000000000000000000000000c7acf18000000000000000000000000000000000000000000000000000000000000000a0000000000000000000000000000000000000000000000000000000000000000000000…	16113068	0xb451fb5916693a3707a654afe205186f11a73f85e790ea8e26707fd1115df079
748	0xe624bb6ae165de18f4dd97e3b3b0ffdcce1e528e823b0a3257d5dabc7fcc0601	0x690b9a9e9aa1c9db991c7721a92d351db4fac990	0x4675c7e5baafbffbca748158becba61ef3b0a263	2.05e+17	0x	16113068	0xb451fb5916693a3707a654afe205186f11a73f85e790ea8e26707fd1115df079
749	0x582fd15893b70494b32989fb4736a01dd92f22e08e31ab9effeabfde21a2ceb8	0xf5491f793d47a6ea22f5e0b9ad3990cf66c4b40b	0xdac17f958d2ee523a2206206994597c13d831ec7	0	0xa9059cbb000000000000000000000000be952e75380c214021d9a2129a7ae959f9293b5f0000000000000000000000000000000000000000000000000000000008a48640	16113068	0xb451fb5916693a3707a654afe205186f11a73f85e790ea8e26707fd1115df079
751	0xc58bc014b5dcfd9fb1ec2b7ab120ac87397b04c310a7e64687523975b931d9a3	0x02d3e09e03396a4a3a91061db7a2098eea330eb8	0x3845badade8e6dff049820680d1f14bd3903a5d0	0	0x095ea7b300000000000000000000000040ec5b33f54e0e8a33a975908c5ba1c14e5bbbdfffffffffffffffffffffffffffffffffffffffffffffffffffffffffffffffff	16113068	0xb451fb5916693a3707a654afe205186f11a73f85e790ea8e26707fd1115df079
753	0xcc7f538f460eed591d778707f5f376a54c0f3e7299de02e2f950dab5a90fdc7d	0x013e170a3a69867c35e54daa137080fefcdedc68	0x7db5af2b9624e1b3b4bb69d6debd9ad1016a58ac	0	0x095ea7b30000000000000000000000004fa72dd7ec160a4f2d9683216e6ae71a6a15427a00000000000000000000000000000000000000000000000003952dbd32493940	16113068	0xb451fb5916693a3707a654afe205186f11a73f85e790ea8e26707fd1115df079
755	0x0b82c303395a7827a46664ece3c1ec147514bdfb790532221c2940e811c2402f	0x3785db986301f621a66f3d38d0514ee4772524b3	0x7492e30d60d96c58ed0f0dc2fe536098c620c4c0	0	0xefef39a10000000000000000000000000000000000000000000000000000000000000001	16113068	0xb451fb5916693a3707a654afe205186f11a73f85e790ea8e26707fd1115df079
758	0x6420e4bf215bb7de73ddef88707d24d74bd554e9b2c70db7fc01d7696ec25265	0xc3e2fa491f1f2a36407f5ef3561b4bbc7851ef80	0x5bca4075dfc8065235cf75c6b15b410e62845fec	1.9e+18	0x	16113068	0xb451fb5916693a3707a654afe205186f11a73f85e790ea8e26707fd1115df079
760	0x077fafbf7e258ee41efabd4337fca2cb524c97d4f6e7a5f39d8a3f1a3ac3edd0	0xb8fb111f2fdb6d500830f4937892b928bba0eccb	0xedb4e61face0ea4453ca24ea766ba9db9c36f14f	0	0x40ccc082000000000000000000000000b8fb111f2fdb6d500830f4937892b928bba0eccb0000000000000000000000000000000000000000000000000000000000000001	16113068	0xb451fb5916693a3707a654afe205186f11a73f85e790ea8e26707fd1115df079
762	0x92a9ef3d55ad1e92ba3c67d0890f3054a79684179e400a4cc8220305524f2daa	0x1be210e7990eff6c07cb8cadcb9d077063ac3614	0x7f57579729c097c9f9c824fc9877dde886b4d7f6	2100000000000000	0x	16113067	0x9e77e2558e5c927971f263ea12cf1d87c0a33c011f967f4e4bb65d2ca1771c04
763	0x726ea4430d05a81895084634bdcbaf3f747f0b1698de96dcb383b3f987f5db55	0xdfd5293d8e347dfe59e90efd55b2956a1343963d	0xde1729779488cdaecadc4993bd7db67923602de9	6.38e+17	0x	16113067	0x9e77e2558e5c927971f263ea12cf1d87c0a33c011f967f4e4bb65d2ca1771c04
766	0x06c7e412b12865cddba8d495f5e13c0981b7d3caf459deffdecc03e31102bc19	0x81196bb8d26b08ecc32e24a26664a3ce57af8b49	0xc6dca8e9c9eb5a7eb68b04a69e63352d5d98695c	0	0x5b70ea9f	16113067	0x9e77e2558e5c927971f263ea12cf1d87c0a33c011f967f4e4bb65d2ca1771c04
767	0x41faf36ab337702bc6ac6d103ac5f211ae2f65ebb0c60ac0b2c24d6151eb97c9	0xd24400ae8bfebb18ca49be86258a3c749cf46853	0xd104a2895f536ead601e0f486fcd66f6ccd5b4f4	9.61e+16	0x	16113067	0x9e77e2558e5c927971f263ea12cf1d87c0a33c011f967f4e4bb65d2ca1771c04
768	0xf9f9ac8102e37b9280af750d7e2cf9fb6c965fb2efc570fa361daaaf32266f71	0xcbb2cfe9b54a2168fbcece683b487e20957b78d1	0xfc455f25d29ebc6b19d91daa1bf9446ca3b9ed23	5.03e+17	0x	16113067	0x9e77e2558e5c927971f263ea12cf1d87c0a33c011f967f4e4bb65d2ca1771c04
769	0x1b90c6dace6f3634a1f865d22e4a65e89bfe041f2c327be17ebf37d51eb019c6	0xfe5cf5bb83efde3120564f6cc3d33b80be65491e	0x000000000000ad05ccc4f10045630fb830b95127	1.31e+18	0x9a1fc3a70000000000000000000000000000000000000000000000000000000000000040000000000000000000000000000000000000000000000000000000000000036000000000000000000000000000000000000000000000000000000000000000e0000000000000000000000000000000000000000000000000000000000000001bb2ed8373d81ae121f713949df11b712106658b22dabda59d39e614c9f178f1852975a4b08b23bff149ca8dbdc8508e2fa499d2a90d8f0ebd77f8d153b8bf83e300000…	16113067	0x9e77e2558e5c927971f263ea12cf1d87c0a33c011f967f4e4bb65d2ca1771c04
772	0x6bd23dc2c3605961a108b76209f0cc7742040de81d8325e508685c2a212d3657	0x8729ed2a3de6cc1d797589cec8a67f640d537848	0xd9f6724f250f4da8453e3dd97d718872bf72c1da	0	0x095ea7b300000000000000000000000068b3465833fb72a70ecdf485e0e4c7bd8665fc45ffffffffffffffffffffffffffffffffffffffffffffffffffffffffffffffff	16113067	0x9e77e2558e5c927971f263ea12cf1d87c0a33c011f967f4e4bb65d2ca1771c04
773	0x5d3b0e74ebe4de90b8eb7fb2329ef4abaf1cad0cacc8285a9d9f8b31408906a5	0x110fd4f4ed7b8fe5d9c915707cce8f2189ef09b8	0x68b3465833fb72a70ecdf485e0e4c7bd8665fc45	3e+17	0x5ae401dc00000000000000000000000000000000000000000000000000000000638c0db300000000000000000000000000000000000000000000000000000000000000400000000000000000000000000000000000000000000000000000000000000002000000000000000000000000000000000000000000000000000000000000004000000000000000000000000000000000000000000000000000000000000001800000000000000000000000000000000000000000000000000000000000000104b8581…	16113067	0x9e77e2558e5c927971f263ea12cf1d87c0a33c011f967f4e4bb65d2ca1771c04
774	0x8d970f3e7fc2ab7d06dbc1be716704d662ad888dd18c498529b9116c3b9c3b65	0x96d732da3db8d05279da8367f299ab0e1244c20f	0x1ae45de5fefef2100efb488bca33fffd57d5578d	2000000000000000	0x	16113067	0x9e77e2558e5c927971f263ea12cf1d87c0a33c011f967f4e4bb65d2ca1771c04
775	0x0da04e17e2e683d091ff283c4a062cf8e2f10150d78ce1bf388a37d90c4e08fd	0x9d568587a24d3be098eeb2513d58f17a72f634d8	0x68b3465833fb72a70ecdf485e0e4c7bd8665fc45	0	0x5ae401dc00000000000000000000000000000000000000000000000000000000638ce3970000000000000000000000000000000000000000000000000000000000000040000000000000000000000000000000000000000000000000000000000000000100000000000000000000000000000000000000000000000000000000000000200000000000000000000000000000000000000000000000000000000000000124b858183f0000000000000000000000000000000000000000000000000000000000000…	16113067	0x9e77e2558e5c927971f263ea12cf1d87c0a33c011f967f4e4bb65d2ca1771c04
776	0xfea40a9bf5a917d2975c8d8924b9b8fd0021df5af5d4ed78fd405861d45fd295	0x0d0707963952f2fba59dd06f2b425ace40b492fe	0x9506d37f70eb4c3d79c398d326c871abbf10521d	0	0xa9059cbb00000000000000000000000081153f0889ab398c4acb42cb58b565a5392bba9500000000000000000000000000000000000000000000021faba04bd9d5088000	16113067	0x9e77e2558e5c927971f263ea12cf1d87c0a33c011f967f4e4bb65d2ca1771c04
777	0x4ad5e84b6530398b035836b6ae31d49939fbb3515b3ef723008e77f10183e006	0xd63168ee0ea681fe60584dcec29374ac1a4282e7	0x1875f2d5b9bbc0370d5c079b47b1e0ca590f0323	1.57e+17	0x	16113067	0x9e77e2558e5c927971f263ea12cf1d87c0a33c011f967f4e4bb65d2ca1771c04
778	0x4955e1fc94600c12c9f3e338e0374fc8c3ddae56f7d510a1e6f83e03aed5bc47	0xf141dc7839add8927556cdf2116b088af1f20f72	0x68b3465833fb72a70ecdf485e0e4c7bd8665fc45	0	0x5ae401dc00000000000000000000000000000000000000000000000000000000638ce5ef000000000000000000000000000000000000000000000000000000000000004000000000000000000000000000000000000000000000000000000000000000020000000000000000000000000000000000000000000000000000000000000040000000000000000000000000000000000000000000000000000000000000016000000000000000000000000000000000000000000000000000000000000000e4472b4…	16113067	0x9e77e2558e5c927971f263ea12cf1d87c0a33c011f967f4e4bb65d2ca1771c04
780	0x9624b5467f11d51c0f9b6f2de9fb9d605711bde77d803226699a37f6d0e5c592	0xed0226d12a31c2ec53a3c2bb819023a9c752c003	0x8921e4e7d8438f86552e6e716b05e7ee289dd8e0	4.84e+16	0x	16113067	0x9e77e2558e5c927971f263ea12cf1d87c0a33c011f967f4e4bb65d2ca1771c04
782	0x4e6e2986630adf3654a3d0158c0281011e38762085b090a19925f4a79c6965df	0x1be210e7990eff6c07cb8cadcb9d077063ac3614	0x9ad85fae4191b1992acfe8526c8772ec8c5a708d	2100000000000000	0x	16113067	0x9e77e2558e5c927971f263ea12cf1d87c0a33c011f967f4e4bb65d2ca1771c04
783	0x4c1e920cc1ba92e8cfe094f7c0d5f2fb4f686033d8fe100bd1f28dab6ad4b908	0x9362d131a21aefc4fefae87141974fe4b80720e7	0xc02aaa39b223fe8d0a0e5c4f27ead9083c756cc2	0	0x2e1a7d4d000000000000000000000000000000000000000000000000002aa1efb94e0000	16113067	0x9e77e2558e5c927971f263ea12cf1d87c0a33c011f967f4e4bb65d2ca1771c04
785	0xfd15fe27dfd73946d40082808be40bb81cc42b0021f971085aec2d574497cdf0	0x0acdd0fefb605957dfcba4816d77c43dec3f1f79	0x8718c0851c528464859dc53857dd30d107ef97a9	3000000000000000	0x	16113067	0x9e77e2558e5c927971f263ea12cf1d87c0a33c011f967f4e4bb65d2ca1771c04
786	0x5fc51873d8490a978b2659d9b075d54354862dcaf1049b67d3aa3713806c3797	0xfc3b947217bb5e2e4c1b51d9068ac9c5e2551ffc	0x49cf6f5d44e70224e2e23fdcdd2c053f30ada28b	0	0xa9059cbb0000000000000000000000005bcec5bb80cde34341cad6eb553e996cccbdaa160000000000000000000000000000000000000000000000000000000000000001	16113067	0x9e77e2558e5c927971f263ea12cf1d87c0a33c011f967f4e4bb65d2ca1771c04
787	0x19a99599bae9f74afa3b133f6acf1ba5733ce19f65bad4c864daf8a4c0c15735	0x129c24df1bd82bc2ce9f461063af011662926ba5	0x7b029debdf1fdfa07dacf3d7b630a8254f4ffa40	3000000000000000	0x	16113067	0x9e77e2558e5c927971f263ea12cf1d87c0a33c011f967f4e4bb65d2ca1771c04
788	0x26257309662f074fb56382c544aabd43acaf10058613422ae873ffba66af8f5a	0xbc3613715492a94f76aaab581dcdfe61d8858b4b	0x806138db9a18f06c3c22c18b102b1468dad2bb78	0	0x42842e0e000000000000000000000000bc3613715492a94f76aaab581dcdfe61d8858b4b00000000000000000000000045eb0febe82c06d991d374d289d931d4501daa120000000000000000000000000000000000000000000000000000000000001565360c6ebe	16113067	0x9e77e2558e5c927971f263ea12cf1d87c0a33c011f967f4e4bb65d2ca1771c04
789	0xfff284b9ed8ac49147859531456fd7725d06681eddfb6e1ebae28a872ac3a54a	0x87d63b96ca7695775fdde18ade27480143f9dfa0	0xeeeec6476073778077b40a73fe32e23a9876cab4	7.94e+16	0x2b66d72e000000000000000000000000000000000000000000000000000000000000002000000000000000000000000000000000000000000000000000000000000000ea65794a68624763694f694a46557a49314e694973496d74705a434936496a64684e6a526c5a6d51314c544a694e4463744e475a6a5a6931684f4463784c5445785a6d59354f5451345954646a4f434a392e436751784d6a553545674e56553051614a475a69595455305a6a63314c5459355a5451744e4455795a6930355a5463774c5…	16113067	0x9e77e2558e5c927971f263ea12cf1d87c0a33c011f967f4e4bb65d2ca1771c04
792	0xaca0ae12372ead991e6dff2229e61633edd8164b1dc438a3960390aa23891eb9	0x6ceb123816b96b07dfb9798d5035ada1de527bb0	0xa0b86991c6218b36c1d19d4a2e9eb0ce3606eb48	0	0xa9059cbb000000000000000000000000e8fd67447b2ecd5d19920459b8cb47301045c0af000000000000000000000000000000000000000000000000000000007855915f	16113067	0x9e77e2558e5c927971f263ea12cf1d87c0a33c011f967f4e4bb65d2ca1771c04
793	0x9ac7253e2dce3effc09c900ff08e1789538c3ed245072e95d5486defb8aeab4f	0x28c6c06298d514db089934071355e5743bf21d60	0xdac17f958d2ee523a2206206994597c13d831ec7	0	0xa9059cbb000000000000000000000000466453b0580f93598288c8e7b1e6e72e20e964b000000000000000000000000000000000000000000000000000000000120c5c80	16113067	0x9e77e2558e5c927971f263ea12cf1d87c0a33c011f967f4e4bb65d2ca1771c04
794	0x833a112425e908120a6d0e72fe346f418c5289ba520569cc19fafa8b3b447490	0x56f70a0bbfefa9db41f024198c7185107f42bac2	0x00000000006c3852cbef3e08e8df289169ede581	0	0xfd9f1e1000000000000000000000000000000000000000000000000000000000000000200000000000000000000000000000000000000000000000000000000000000001000000000000000000000000000000000000000000000000000000000000002000000000000000000000000056f70a0bbfefa9db41f024198c7185107f42bac2000000000000000000000000004c00500000ad104d7dbd00e3ae0a5c00560c00000000000000000000000000000000000000000000000000000000000000016000000…	16113067	0x9e77e2558e5c927971f263ea12cf1d87c0a33c011f967f4e4bb65d2ca1771c04
796	0x77028c3b1c99282c8889eb0b73c1863fe5af572c285dfbb7556e9dc405979d1c	0x5f4e2af2e15e6cba35eb0950f7fb35adad0c7312	0x9717e477cc5869a4a228361492b9bf7b8db58582	0	0xa22cb4650000000000000000000000001e0049783f008a0085193e00003d00cd54003c710000000000000000000000000000000000000000000000000000000000000001	16113067	0x9e77e2558e5c927971f263ea12cf1d87c0a33c011f967f4e4bb65d2ca1771c04
797	0x1c0caf5ba6a6777bbe57b364b2ece26ade71d1322192120c3e33f3ad15d5eda6	0x4768a5dd0873d14acfd33d09ed6f6a16baa9494f	0xdac17f958d2ee523a2206206994597c13d831ec7	0	0xa9059cbb0000000000000000000000002a5d5fea2bd48695ecff8bb58339c1a6e0f6e17b0000000000000000000000000000000000000000000000000000000065bec0c0	16113067	0x9e77e2558e5c927971f263ea12cf1d87c0a33c011f967f4e4bb65d2ca1771c04
799	0x50bb1eb66fc9aad54a7657134795814faa3577e0382e10e1eb2455138f6468d1	0x51e94a6e8f0b6374280a9e21973c6ec58ffe5f11	0x932261f9fc8da46c4a22e31b45c4de60623848bf	0	0x1249c58b	16113067	0x9e77e2558e5c927971f263ea12cf1d87c0a33c011f967f4e4bb65d2ca1771c04
803	0x6274696a72d4036d1cf7e86a4e868e2737796636ed6807203573a184abd6eed0	0x28e48a0e8b6ebfa3b3a1b7e963e15ce8d98eab42	0xc67b9897d793a823f0e9cf850aa1b0d23e3f8d09	0	0xa22cb4650000000000000000000000001e0049783f008a0085193e00003d00cd54003c710000000000000000000000000000000000000000000000000000000000000001	16113067	0x9e77e2558e5c927971f263ea12cf1d87c0a33c011f967f4e4bb65d2ca1771c04
804	0x8690cb5ea70ec937fae5f10c168fd2b715afb4167c0672e0ca55a914204c5019	0x410ded847aa95d55b43c248c23e22810ba903450	0x06450dee7fd2fb8e39061434babcfc05599a6fb8	0	0x9ff054df00000000000000000000000000000000000000000000000000000000000000b4	16113067	0x9e77e2558e5c927971f263ea12cf1d87c0a33c011f967f4e4bb65d2ca1771c04
805	0x676b9141db4e662041cf102a7682c63b6ab93d5103fd8d82124dd02086707155	0xe850b7c87f66371035e184c72d4b99e7b2ca4865	0xbbbbca6a901c926f240b89eacb641d8aec7aeafd	0	0xa9059cbb0000000000000000000000002fc617e933a52713247ce25730f6695920b3befe0000000000000000000000000000000000000000000000018493fba64ef00000	16113067	0x9e77e2558e5c927971f263ea12cf1d87c0a33c011f967f4e4bb65d2ca1771c04
807	0x56ecf8143b919a6d4128e15dddfdfb7640027734d18a547ba96b7318e3b12275	0x7bd8477901552199e8208f62875aa94fab2fffb3	0x1a46fe8722cab63a9f723d9e07f6eaa56559b1a2	1e+18	0x	16113067	0x9e77e2558e5c927971f263ea12cf1d87c0a33c011f967f4e4bb65d2ca1771c04
808	0xe534b4ee4dc95c651faf3f24a4c2cb2dfe1c6cef8fcf37bcafde5b1d8d7bb1db	0xa9831d89c4067bf7518efbcb6351ef6dd0059f33	0xdac17f958d2ee523a2206206994597c13d831ec7	0	0x23b872dd000000000000000000000000d3b4085a69ae671fb152bcd33fab499a23d6fac4000000000000000000000000cb8cfe771cb23f4aa2c36216c27834c67adda53f0000000000000000000000000000000000000000000000000000000000000000	16113067	0x9e77e2558e5c927971f263ea12cf1d87c0a33c011f967f4e4bb65d2ca1771c04
809	0xbbcbb0c4b6ff283a36245fbcef0f8b11c27120ca7cc48205c5e33a877c29acd0	0xc550893593e3cccec5cf5cd8e0755de704b8fd4a	0x81153f0889ab398c4acb42cb58b565a5392bba95	0	0x08bbb82400000000000000000000000000000000000000000000000000000000000000000000000000000000000000008305cda6ae133e5ced575dd6806234f328a1b572f44d93860000000000000000000000000000000000000000000000000a439b1519997e4f0000000000000000000000009506d37f70eb4c3d79c398d326c871abbf10521d0000000000000000000000009b3df8eae6e1ed1b931086852860d3c6375d7ae60000000000000000000000000000000000000000000000000000000000000…	16113067	0x9e77e2558e5c927971f263ea12cf1d87c0a33c011f967f4e4bb65d2ca1771c04
810	0xc975299cfdb4269c152787be7042c9f3d8905dd1339830f1bc5737d0538db756	0x99f48c1108b29899b068bf6fe71c6029a208313d	0x7a250d5630b4cf539739df2c5dacb4c659f2488d	0	0x791ac94700000000000000000000000000000000000000000000861bebc67f2370000000000000000000000000000000000000000000000000000000025f927148561fe000000000000000000000000000000000000000000000000000000000000000a000000000000000000000000099f48c1108b29899b068bf6fe71c6029a208313d00000000000000000000000000000000000000000000000000000000638cdff2000000000000000000000000000000000000000000000000000000000000000200000…	16113067	0x9e77e2558e5c927971f263ea12cf1d87c0a33c011f967f4e4bb65d2ca1771c04
813	0xd7447bf625205402515bfdd698c2e0f29749f4c79cbc90d98584f3c0e71e146f	0x1be210e7990eff6c07cb8cadcb9d077063ac3614	0x99822f75e03479a2ee6eaffd3aaf09fd58f59ca1	2100000000000000	0x	16113067	0x9e77e2558e5c927971f263ea12cf1d87c0a33c011f967f4e4bb65d2ca1771c04
815	0x0b2f078407b888a47f829d6c63ff50f1a6a6108c1f196706937c2197b45581b7	0x61317c73d0225b2e37140fb9664d607b450613c6	0x06ce8be8729b6ba18dd3416e3c223a5d4db5e755	0	0xc9807539000000000000000000000000000000000000000000000000000000000000008000000000000000000000000000000000000000000000000000000000000003800000000000000000000000000000000000000000000000000000000000000480010000010000010000000000000000000000000000000000000000000000000000000000000000000000000000000000000000000000000000000000000002e000000000000000000000003dcadc00d8ea9335947a9329db4fe66300005262040f101…	16113067	0x9e77e2558e5c927971f263ea12cf1d87c0a33c011f967f4e4bb65d2ca1771c04
817	0xcc30ff525cd5b8605d6450157ce5dec871153d85f17ffbcdf2d7e3f96334886a	0x1be210e7990eff6c07cb8cadcb9d077063ac3614	0x10445f37d6d33a2483932965c679d6a9b5362741	2100000000000000	0x	16113067	0x9e77e2558e5c927971f263ea12cf1d87c0a33c011f967f4e4bb65d2ca1771c04
819	0x692e37c62facec42acde5b736c628dc7b3617e2b2ab668886593cbf71a7cd6a6	0xa3f8e8f0cf8515ce379e1a075eb19b18a6064d6b	0xdac17f958d2ee523a2206206994597c13d831ec7	0	0x095ea7b30000000000000000000000001111111254fb6c44bac0bed2854e76f90643097dffffffffffffffffffffffffffffffffffffffffffffffffffffffffffffffff	16113067	0x9e77e2558e5c927971f263ea12cf1d87c0a33c011f967f4e4bb65d2ca1771c04
823	0xdbf17094494f38e632c09dc6ef8dcbea0c3ad08b5953cdbbfc4528f6d57fad2c	0x00bdb5699745f5b860228c8f939abf1b9ae374ed	0x1522900b6dafac587d499a862861c0869be6e428	0	0x2da03409000000000000000000000000cb943d9aa156cfa77970bbcb9b4506b0a23bb76b000000000000000000000000a117000000f279d81a1d3cc75430faa017fa5a2e	16113067	0x9e77e2558e5c927971f263ea12cf1d87c0a33c011f967f4e4bb65d2ca1771c04
824	0x70168b42afaa5f251415f2666db36d1034d49a73876ccdc7b74e562087a860da	0x3ba0781d1fa26477797d73078016546f7e615d88	0xb4a81261b16b92af0b9f7c4a83f1e885132d81e4	0	0x67dfd4c900000000000000000000000000000000000000000006e769c4bf9ec4bf0e4651	16113067	0x9e77e2558e5c927971f263ea12cf1d87c0a33c011f967f4e4bb65d2ca1771c04
828	0x739042b6c0ae2dedd4c0ca344eda085ac064d38d773f79a210a114b2c9745f17	0xd25165a001a43f90d1812a67f97a7c5756fb2726	0xdac17f958d2ee523a2206206994597c13d831ec7	0	0xa9059cbb000000000000000000000000e68590213ede1f5ecf0e10a1ad5cc1a673f4aff10000000000000000000000000000000000000000000000000000000023c34600	16113067	0x9e77e2558e5c927971f263ea12cf1d87c0a33c011f967f4e4bb65d2ca1771c04
829	0x5306f1810c798955e80bb758c8cddbde6084aaf55ba2d6bc21ab17426c239e7a	0x1ea707b8640cea9bfbfc9b5c16a06ca47c0525d2	0x92701d42e1504ef9fce6d66a2054218b048dda43	8300000000000000	0x59486cd100000000000000000000000000000000000000000000000000000000000000600000000000000000000000000000000000000000000000000000000000000640000000000000000000000000000000000000000000000000000000000000000100000000000000000000000000000000000000000000000000000000000000010000000000000000000000000000000000000000000000000000000000000020000000000000000000000000000000000000000000000000000000000000000800000…	16113067	0x9e77e2558e5c927971f263ea12cf1d87c0a33c011f967f4e4bb65d2ca1771c04
830	0xe2fbbc8fd786ceac9832decc1c865421472bcb96668678f6f8c85ee66cf0f0b3	0xd94324b85a7e88ee00461f5e0175ccc83420c4b9	0xff1f2b4adb9df6fc8eafecdcbf96a2b351680455	5e+18	0x7ff48afb00000000000000000000000000000000000000000000000000000000000000000000000000000000000000000000000000000000000000004564902ad97d8000000000000000000000000000d94324b85a7e88ee00461f5e0175ccc83420c4b90000000000000000000000000000000000000000000000000000000000000000	16113067	0x9e77e2558e5c927971f263ea12cf1d87c0a33c011f967f4e4bb65d2ca1771c04
832	0xd20a0cfde75b1c9d60070112b87809559ea500fbdb2d49d94057e3842ed0266d	0xa9831d89c4067bf7518efbcb6351ef6dd0059f33	0xdac17f958d2ee523a2206206994597c13d831ec7	0	0x23b872dd0000000000000000000000007cf811364f01653d117a95e156cd1805b32dba28000000000000000000000000cd7e0da743dbce065040dcffda1a8d2c28ba442f0000000000000000000000000000000000000000000000000000000000000000	16113067	0x9e77e2558e5c927971f263ea12cf1d87c0a33c011f967f4e4bb65d2ca1771c04
838	0x1e0d7144af13ccb7b5f59986ef8f0575b7b074d2503388e1daf87f09ac8c8dc9	0xb9b5cd40fc69871eb579872b5e8065a29d2906da	0xba12222222228d8ba445958a75a0704d566bf2c8	20000000000000	0xb95cac28c29562b045d80fd77c69bec09541f5c16fe20d9d000200000000000000000251000000000000000000000000b9b5cd40fc69871eb579872b5e8065a29d2906da000000000000000000000000b9b5cd40fc69871eb579872b5e8065a29d2906da0000000000000000000000000000000000000000000000000000000000000080000000000000000000000000000000000000000000000000000000000000008000000000000000000000000000000000000000000000000000000000000000e000000…	16113067	0x9e77e2558e5c927971f263ea12cf1d87c0a33c011f967f4e4bb65d2ca1771c04
839	0x570c49d5d6daf0563ef03f22c651fee3a135d4bb46269df6f71ad7dee49c02ad	0x8216874887415e2650d12d53ff53516f04a74fd7	0x18947dfc9af649aa3301bbe13b31c8c127b09e12	9.23e+16	0x	16113067	0x9e77e2558e5c927971f263ea12cf1d87c0a33c011f967f4e4bb65d2ca1771c04
843	0x5e88766d4fb145e22d7d69d73b20d6c1acc7b751533eff641df0261117bff673	0x974caa59e49682cda0ad2bbe82983419a2ecc400	0xdac17f958d2ee523a2206206994597c13d831ec7	0	0xa9059cbb00000000000000000000000030b153b77ba6d6b8660cbd35b57739f2dd49fa0a000000000000000000000000000000000000000000000000000000005de097c0	16113067	0x9e77e2558e5c927971f263ea12cf1d87c0a33c011f967f4e4bb65d2ca1771c04
844	0x1da114ed933e403b5f9a0c9fb8e8b860da0de6ae13c7a4701394ed0aa5cef4b9	0x8d381481be81184259dd6e3daef415bccf71a610	0xdef1c0ded9bec7f1a1670819833240f027b25eff	0	0x7d49ec1a000000000000000000000000c02aaa39b223fe8d0a0e5c4f27ead9083c756cc2000000000000000000000000b8c77482e45f1f44de1745f52c74426c631bdd520000000000000000000000000000000000000000000000000de0b6b3a76400000000000000000000000000000000000000000000000000002789b0396e60a00000000000000000000000000000000000000000000000000000000000000000000000000000000000000000008d381481be81184259dd6e3daef415bccf71a61000000…	16113067	0x9e77e2558e5c927971f263ea12cf1d87c0a33c011f967f4e4bb65d2ca1771c04
845	0x56752ad97226fb6bd13597a2ae0b5c4bb5ef840e99a9923c9930282fe9acb25c	0xbc3613715492a94f76aaab581dcdfe61d8858b4b	0x806138db9a18f06c3c22c18b102b1468dad2bb78	0	0x42842e0e000000000000000000000000bc3613715492a94f76aaab581dcdfe61d8858b4b00000000000000000000000045eb0febe82c06d991d374d289d931d4501daa12000000000000000000000000000000000000000000000000000000000000139d360c6ebe	16113067	0x9e77e2558e5c927971f263ea12cf1d87c0a33c011f967f4e4bb65d2ca1771c04
846	0x91f648fbd94fddc261d6c389060fc4266ad4a22b3bd750b067fe69494417ec19	0xa4e5961b58dbe487639929643dcb1dc3848daf5e	0x6ceb0bccd36ef2fb412ec41c81d77f9bf4ac7f9b	1610000000000000	0x	16113067	0x9e77e2558e5c927971f263ea12cf1d87c0a33c011f967f4e4bb65d2ca1771c04
848	0x1c983baf3aec0256655bd7fa6ae566680d16197b1dbf320dc0684c76995b681a	0xd24400ae8bfebb18ca49be86258a3c749cf46853	0x5f65f7b609678448494de4c87521cdf6cef1e932	0	0xfa558b710000000000000000000000000d8775f648430679a709e98d2b0cb6250d2887ef000000000000000000000000000000000000000000000000000000000000006000000000000000000000000000000000000000000000000000000000000000a0000000000000000000000000000000000000000000000000000000000000000100000000000000000000000062b01323e35f72f0ae2652809b928b055e307d73000000000000000000000000000000000000000000000000000000000000000100000…	16113067	0x9e77e2558e5c927971f263ea12cf1d87c0a33c011f967f4e4bb65d2ca1771c04
849	0x1bafd527c59e043e5e9d12bee8161ba49debd66f3ab4ec585159f116cb29794f	0x8db1186dbb45ecc2b8d5f452c75a866f5da76d60	0x2efa07cac3395599db83035d196f2a0e7263f766	0	0x42842e0e0000000000000000000000008db1186dbb45ecc2b8d5f452c75a866f5da76d600000000000000000000000005e5844cafc6e0cf879d18bd53a59905e4bf7838d000000000000000000000000000000000000000000000000000000000000051a360c6ebe	16113067	0x9e77e2558e5c927971f263ea12cf1d87c0a33c011f967f4e4bb65d2ca1771c04
850	0x122f4e1fc0732d3ec18da38f3ca3ae7eb7d1615ea97944d73ccbc17e2b7a1b0b	0x8db1186dbb45ecc2b8d5f452c75a866f5da76d60	0x2efa07cac3395599db83035d196f2a0e7263f766	0	0x42842e0e0000000000000000000000008db1186dbb45ecc2b8d5f452c75a866f5da76d600000000000000000000000005e5844cafc6e0cf879d18bd53a59905e4bf7838d000000000000000000000000000000000000000000000000000000000000051a360c6ebe	16113067	0x9e77e2558e5c927971f263ea12cf1d87c0a33c011f967f4e4bb65d2ca1771c04
851	0x8a1ee32b7b8f5bd69f40e270077f84c7d2cdbce5856dbc7427dff2287e195ed1	0x95b564f3b3bae3f206aa418667ba000afafacc8a	0xa0b86991c6218b36c1d19d4a2e9eb0ce3606eb48	0	0xa9059cbb000000000000000000000000cc4b5f29e9602950909afccd316924f27a355f78000000000000000000000000000000000000000000000000000000005c7e96c0	16113067	0x9e77e2558e5c927971f263ea12cf1d87c0a33c011f967f4e4bb65d2ca1771c04
852	0xac1d51dc59844b3029c7faed9940208fb3470945b5341a721e46375e21862fa3	0x06e52490d17ccf96cafda1856f177fd32d3a4bef	0xed5af388653567af2f388e6224dc7c4b3241c544	0	0xa22cb465000000000000000000000000f42aa99f011a1fa7cda90e5e98b277e306bca83e0000000000000000000000000000000000000000000000000000000000000001	16113067	0x9e77e2558e5c927971f263ea12cf1d87c0a33c011f967f4e4bb65d2ca1771c04
855	0xc72b2e17757857cb1139915f39bceb2e67c5d5a87911e047e5f87066debfdcd1	0xd24400ae8bfebb18ca49be86258a3c749cf46853	0x5f65f7b609678448494de4c87521cdf6cef1e932	0	0x3cd18ca00000000000000000000000003506424f91fd33084466f402d5d97f05f8e3b4af000000000000000000000000000000000000000000000000000000000000004000000000000000000000000000000000000000000000000000000000000000010000000000000000000000004525f7d64a4d69304a5a8a1f9345fc44de308b8f	16113067	0x9e77e2558e5c927971f263ea12cf1d87c0a33c011f967f4e4bb65d2ca1771c04
857	0xc9652e2852a1fc893ad057e4d6b8dccfad0a10d499316c90820e2d7029b8a21b	0x57cd4848b12469618b689163f507817940acca02	0xae74faa92cb67a95ebcab07358bc222e33a34da7	0	0xc980753900000000000000000000000000000000000000000000000000000000000000800000000000000000000000000000000000000000000000000000000000000500000000000000000000000000000000000000000000000000000000000000068000000101010101010000010000000000000000000000000000000000000000000000000000000000000000000000000000000000000000000000000000000460000000000000000000000001ee1ad85737ba11a90914c55755af4e000049130513110…	16113067	0x9e77e2558e5c927971f263ea12cf1d87c0a33c011f967f4e4bb65d2ca1771c04
858	0xfb6c78983c1e1ce388555b268cab59ee4335f3af46b8dee5f3802283a55259ae	0x6a436e73b5d0c384a3b6236f9f1d67ca93ce1d40	0x5b7717121976449b1df58c870f1c2ad6931e713a	2.38e+17	0x	16113067	0x9e77e2558e5c927971f263ea12cf1d87c0a33c011f967f4e4bb65d2ca1771c04
859	0xceec2a8bbd60a647a860ba6fdd88c2f4ea8d896b8c0bb28ca5e0144dfd86f2b8	0xf7858da8a6617f7c6d0ff2bcafdb6d2eedf64840	0x73e21c836c4a0a3f776438a30970f24934c1cef2	3.12e+16	0x	16113067	0x9e77e2558e5c927971f263ea12cf1d87c0a33c011f967f4e4bb65d2ca1771c04
860	0xbe553d3b984da12e20557ba9cb8864229141bab20c350c5b67513486ec710d99	0x110fd4f4ed7b8fe5d9c915707cce8f2189ef09b8	0x7a250d5630b4cf539739df2c5dacb4c659f2488d	3e+17	0x7ff36ab5000000000000000000000000000000000000000000004aeedba4f79dbed350c40000000000000000000000000000000000000000000000000000000000000080000000000000000000000000110fd4f4ed7b8fe5d9c915707cce8f2189ef09b800000000000000000000000000000000000000000000000000000000638ce0110000000000000000000000000000000000000000000000000000000000000002000000000000000000000000c02aaa39b223fe8d0a0e5c4f27ead9083c756cc200000…	16113067	0x9e77e2558e5c927971f263ea12cf1d87c0a33c011f967f4e4bb65d2ca1771c04
861	0x9dd9ce4fb17f64300752c826962578ef77663d9355cbb64103f93c373b504aaf	0x8864afd0c2e8fb24106503af89a9763daf387b55	0x00000000006c3852cbef3e08e8df289169ede581	0	0xfb0f3ee10000000000000000000000000000000000000000000000000000000000000020000000000000000000000000c36cf0cfcb5d905b8b513860db0cfe63f6cf9f5c00000000000000000000000000000183000000000000000000000000000000000000000000000000000000000000000000000000000000000000000000000001000000000000000000000000e179b3db9cb6c9e8316c13159535239fbecbcc66000000000000000000000000004c00500000ad104d7dbd00e3ae0a5c00560c0000000…	16113067	0x9e77e2558e5c927971f263ea12cf1d87c0a33c011f967f4e4bb65d2ca1771c04
864	0xf5cef040f84a135898583e721b167189a2f14818e8589f2e5fc6512d761fb498	0xd57c1a5812f1d2d7ff491c362566115f4a54643a	0x000000000000ad05ccc4f10045630fb830b95127	0	0xf4acd7400000000000000000000000000000000000000000000000000000000000000020000000000000000000000000d57c1a5812f1d2d7ff491c362566115f4a54643a000000000000000000000000000000000000000000000000000000000000000100000000000000000000000000000000006411739da1c40b106f8511de5d1fac000000000000000000000000ed5af388653567af2f388e6224dc7c4b3241c544000000000000000000000000000000000000000000000000000000000000235700000…	16113067	0x9e77e2558e5c927971f263ea12cf1d87c0a33c011f967f4e4bb65d2ca1771c04
867	0xc023b8c1b031353a4d9c2fb45f55c10f19fcafef4449e5acfda2c176ad8a9115	0xb095d9f608d77b95f3ce175ba3cd63534750d60c	0x7df64f69544c5bf71171dc5ab69b8602c2ff1e27	0	0xa22cb4650000000000000000000000001e0049783f008a0085193e00003d00cd54003c710000000000000000000000000000000000000000000000000000000000000001	16113067	0x9e77e2558e5c927971f263ea12cf1d87c0a33c011f967f4e4bb65d2ca1771c04
870	0x3f1ee32b6751b8386ba47b90bb8670745172f9a5b630dd78185761bbb9918f19	0x68927b4c9d4d06ca8ddb8dde366985c08bc7007e	0x24946bcbbd028d5abb62ad9b635eb1b1a67af668	0	0x9aa5d462000000000000000000000000000000000000000000000000016345785d8a000000000000000000000000000068927b4c9d4d06ca8ddb8dde366985c08bc7007e0000000000000000000000000000000000000000000000000000000000000000	16113067	0x9e77e2558e5c927971f263ea12cf1d87c0a33c011f967f4e4bb65d2ca1771c04
872	0x0fc5f001a46575720cd2554ba88819be4096c0e288b6588d2bae6cfbe2c5246a	0x9fb438f1a292fbdaf4f569a8f2e2e2972c0172ec	0xd9e1ce17f2641f24ae83637ab66a2cca9c378b9f	100000000000000	0x7ff36ab5000000000000000000000000000000000000000000000000000000000001e8c200000000000000000000000000000000000000000000000000000000000000800000000000000000000000009fb438f1a292fbdaf4f569a8f2e2e2972c0172ec00000000000000000000000000000000000000000000000000000000638ce5fb0000000000000000000000000000000000000000000000000000000000000002000000000000000000000000c02aaa39b223fe8d0a0e5c4f27ead9083c756cc200000…	16113067	0x9e77e2558e5c927971f263ea12cf1d87c0a33c011f967f4e4bb65d2ca1771c04
879	0x9b963e13b296ff3f00c7ca884c7946508d37107bb98626693f9fc733b763b400	0x4d0c7bb23a67ce2a08c7dd46a2c35c87d837d028	0xc36442b4a4522e871399cd717abdd847ab11fe88	0	0xac9650d80000000000000000000000000000000000000000000000000000000000000020000000000000000000000000000000000000000000000000000000000000000400000000000000000000000000000000000000000000000000000000000000800000000000000000000000000000000000000000000000000000000000000160000000000000000000000000000000000000000000000000000000000000022000000000000000000000000000000000000000000000000000000000000002a000000…	16113067	0x9e77e2558e5c927971f263ea12cf1d87c0a33c011f967f4e4bb65d2ca1771c04
880	0xdb73c3679c16e61fd7bae94cfba4b1a68335b87f7034579fdd89c779596f88c0	0x95b564f3b3bae3f206aa418667ba000afafacc8a	0x408e41876cccdc0f92210600ef50372656052a38	0	0xa9059cbb0000000000000000000000009e2e63a4a95c3a2eddf55a0ea8500db2271937c000000000000000000000000000000000000000000000006e739dc3a35343c800	16113067	0x9e77e2558e5c927971f263ea12cf1d87c0a33c011f967f4e4bb65d2ca1771c04
887	0xe99d50b8ff72cfe5160b9406f13b245f112be781d69002637cb58356c0076e6e	0x11b7e01c575e0be5334b2aa491c5600fc8e2da50	0xbc4e8115e17d96cfd8e3ecef2b0d6e19d00f70b2	0	0xa22cb46500000000000000000000000000000000000111abe46ff893f3b2fdf1f759a8a80000000000000000000000000000000000000000000000000000000000000000	16113067	0x9e77e2558e5c927971f263ea12cf1d87c0a33c011f967f4e4bb65d2ca1771c04
888	0xa24753a0a398c32950775f070a24d5a0dcfcd1924626e5c82665aba9c8154593	0x7cd4854339e35fa0243792685baebce73d6a23d1	0x00000000006c3852cbef3e08e8df289169ede581	1.2e+17	0xfb0f3ee1000000000000000000000000000000000000000000000000000000000000002000000000000000000000000000000000000000000000000000000000000000000000000000000000000000000000000000000000000000000000000000000000000000000000000000000000000000000000000000000000019faae14eb88000000000000000000000000000cbcf161f0b53e534a77989d83a89cbc9d66fd1b9000000000000000000000000004c00500000ad104d7dbd00e3ae0a5c00560c0000000…	16113067	0x9e77e2558e5c927971f263ea12cf1d87c0a33c011f967f4e4bb65d2ca1771c04
890	0x88d1eecfbc75af51f861b5977f8cf1a225337ecd6a278cd05fec28204ff87e8a	0x9723b6d608d4841eb4ab131687a5d4764eb30138	0xdac17f958d2ee523a2206206994597c13d831ec7	0	0xa9059cbb00000000000000000000000072b52049ca94c4cb714fd51deb3170f2b3bf3d590000000000000000000000000000000000000000000000000000000003dfd240	16113067	0x9e77e2558e5c927971f263ea12cf1d87c0a33c011f967f4e4bb65d2ca1771c04
892	0xb9d55742a41db30d6e10f24b4012af3ab4f8e5ff9cac67840ad7aa33ac799c6f	0x89b8ddbe0b70a6cf3fe0a08b9a887fab0dfffb2a	0x83c73d1938bbcf781971df602d0852c4ce8cc890	0	0x095ea7b30000000000000000000000007a250d5630b4cf539739df2c5dacb4c659f2488dffffffffffffffffffffffffffffffffffffffffffffffffffffffffffffffff	16113067	0x9e77e2558e5c927971f263ea12cf1d87c0a33c011f967f4e4bb65d2ca1771c04
895	0x58c9a66d2b68ebe0e7634bebb904dc0c0abc14bf2544d2e968bbe8bd2d3a57a4	0xff8d63cada423ec0e84dc02e5859a962e2bfef84	0xb706bc51630c550fc637aacbc95d600b06ff4c97	0	0xa22cb4650000000000000000000000001e0049783f008a0085193e00003d00cd54003c710000000000000000000000000000000000000000000000000000000000000001	16113067	0x9e77e2558e5c927971f263ea12cf1d87c0a33c011f967f4e4bb65d2ca1771c04
898	0x07cb289f12c29b29ecdba9b92b6de4b32834bcc6e57a1d007f996496e9e6d1f5	0x1be210e7990eff6c07cb8cadcb9d077063ac3614	0x74fdcc0a1d1725faba89fd58a8cfa38371789582	2100000000000000	0x	16113067	0x9e77e2558e5c927971f263ea12cf1d87c0a33c011f967f4e4bb65d2ca1771c04
899	0x589f2c1cfc8eb75710f176525247379d6e91ed6341c2408c0e0f6f8d844dbc34	0x8b8c986cfceca5263acf6bbdd1a6e3137fb89788	0x8e8f404616c22d2a11ce61b9837e0cb53241fbcb	1000000000000000	0xa0712d680000000000000000000000000000000000000000000000000000000000000001	16113067	0x9e77e2558e5c927971f263ea12cf1d87c0a33c011f967f4e4bb65d2ca1771c04
900	0x750357a2346a1c9afc18d8ecc38588974689a38acb958a91e43b39866e8be8cd	0x4af8d782769d7bd5e6056f12908dd26924b45432	0x112a509611d960a68b2c0097e198fac2d8ca4974	6e+16	0x42c180320000000000000000000000000000000000000000000000ea9b1db314c38c8000	16113067	0x9e77e2558e5c927971f263ea12cf1d87c0a33c011f967f4e4bb65d2ca1771c04
901	0xe7da4bce80f7cb22a65bc2237bcfcf9d362615e0a6600b704674e20b72978756	0x110fd4f4ed7b8fe5d9c915707cce8f2189ef09b8	0x881d40237659c251811cec9c364ef91dc08d300c	3e+17	0x5f575529000000000000000000000000000000000000000000000000000000000000008000000000000000000000000000000000000000000000000000000000000000000000000000000000000000000000000000000000000000000429d069189e000000000000000000000000000000000000000000000000000000000000000000c0000000000000000000000000000000000000000000000000000000000000000c307846656544796e616d6963000000000000000000000000000000000000000000000…	16113067	0x9e77e2558e5c927971f263ea12cf1d87c0a33c011f967f4e4bb65d2ca1771c04
902	0xdd6938fed25abc05b1225dbf1099cc7db64f58a8fc1e56c71b3ae88f2ac26908	0x5a4b69ee5150d70616a7144edac6ce8ff22395e2	0x260ee8f2b0c167e0cd6119b2df923fd061dc1093	2.92e+16	0x	16113067	0x9e77e2558e5c927971f263ea12cf1d87c0a33c011f967f4e4bb65d2ca1771c04
904	0x921dfd5af2e1e6d0f1c881adde3666966015119296c4729eab73ee137285350b	0xb095d9f608d77b95f3ce175ba3cd63534750d60c	0x26badf693f2b103b021c670c852262b379bbbe8a	0	0xa22cb4650000000000000000000000001e0049783f008a0085193e00003d00cd54003c710000000000000000000000000000000000000000000000000000000000000001	16113067	0x9e77e2558e5c927971f263ea12cf1d87c0a33c011f967f4e4bb65d2ca1771c04
907	0x552160aa2e79b8e0fe60f7727613a1eddea51956670e4abeebc8d60875764304	0xa9831d89c4067bf7518efbcb6351ef6dd0059f33	0xdac17f958d2ee523a2206206994597c13d831ec7	0	0x23b872dd000000000000000000000000f3b22c531f58d2a09973ec675a154243cc6e64110000000000000000000000001f1113aed69205ad713dccca98c9fcd936ee1bc80000000000000000000000000000000000000000000000000000000000000000	16113067	0x9e77e2558e5c927971f263ea12cf1d87c0a33c011f967f4e4bb65d2ca1771c04
908	0x8cd12b83b6a0b51ebe0eb27a7f4aaa6e4c010c5cdfb6619f921f9ca41bde16fe	0x1be210e7990eff6c07cb8cadcb9d077063ac3614	0xccf97894f1c7609dc4af91f580367dd6f61cd484	2100000000000000	0x	16113067	0x9e77e2558e5c927971f263ea12cf1d87c0a33c011f967f4e4bb65d2ca1771c04
913	0x2666311fb34b9a40de05d975bac7fb578eecbc4e032d7227ee92541a024b00a2	0x4804b42c00619f2a5e259845f435e5b18fee88fd	0x086b656140b30f53fe886023e971a4a5beffe54f	0	0x65f8c6c5000000000000000000000000345022728385f127b2e9bcc335f6e3d6a378c69d	16113067	0x9e77e2558e5c927971f263ea12cf1d87c0a33c011f967f4e4bb65d2ca1771c04
915	0xf1400b18f2476718c047483120e4d465e4129c3999510d595747058df64934f7	0x1be210e7990eff6c07cb8cadcb9d077063ac3614	0x31c0bb1c5d43e169310a2e6b28fd1d416f80832d	2100000000000000	0x	16113066	0x284a38428260c9b61914e52e63f3acea6bdb58e17c00e49c9a4ce8a15fe9f4e8
916	0x5c8aaa27e05d2f999d2ab00cc63599c222d39b107312f60d9faa3c4fc253bf96	0xd8aa8f3be2fb0c790d3579dcf68a04701c1e33db	0x37bc7498f4ff12c19678ee8fe19d713b87f6a9e6	0	0x98e5b12a	16113066	0x284a38428260c9b61914e52e63f3acea6bdb58e17c00e49c9a4ce8a15fe9f4e8
917	0xf48ec336be39a8f6ee8fee6898a6da5ab06d320fc527397a800796e1920fb0bf	0xa74cac9bc2c9ed719a003503e3949d2cd12b408b	0x80aa6d4afd51b7f787379023066010bf0392230b	1.82e+17	0x	16113066	0x284a38428260c9b61914e52e63f3acea6bdb58e17c00e49c9a4ce8a15fe9f4e8
918	0xcca93961122cf7cb380cd233eea09d8394c5e8b008912fb102c0ebf13a0b7453	0x1be210e7990eff6c07cb8cadcb9d077063ac3614	0x9998724f814a9527f0f0f0a44edbf39721d3deba	2100000000000000	0x	16113066	0x284a38428260c9b61914e52e63f3acea6bdb58e17c00e49c9a4ce8a15fe9f4e8
919	0x6f4046add166e4bb8135e0ddc8e87b73f6996d0ffd80ce62ac24ef2224a8dcb3	0x46340b20830761efd32832a74d7169b29feb9758	0x2bf192dad08fc1ed225bcd9f86ec25244ecfa8df	3.89e+17	0x	16113066	0x284a38428260c9b61914e52e63f3acea6bdb58e17c00e49c9a4ce8a15fe9f4e8
920	0x304f8d04c05de9ec2ebf5fbb4f91689f510ee8e511aaaf8e5e18985fc5a95523	0x1be210e7990eff6c07cb8cadcb9d077063ac3614	0xb6d54808eb6b3062968d3892ec641ebb3ec0cd7f	2100000000000000	0x	16113066	0x284a38428260c9b61914e52e63f3acea6bdb58e17c00e49c9a4ce8a15fe9f4e8
922	0x00a9f597bdb9c65ad1fd1c65d37c05710eb2f788f01cad32df375e23ccb6e7e4	0x46340b20830761efd32832a74d7169b29feb9758	0xfb6b3a2359894213dcdf5c196c14c522dc8b321d	5.46e+17	0x	16113066	0x284a38428260c9b61914e52e63f3acea6bdb58e17c00e49c9a4ce8a15fe9f4e8
925	0xc82c5091b0edc8984943fbd0fa9150e890625463fc828ee5c52118a2c25761cb	0x186a979fb4dd8f84b3b1c609e550e6e57dec3569	0x2b6ad2387ff0464cb32b579c7d2cb2126510ef58	0	0xedc9af95000000000000000000000000000000000000000000000000597266b21b60cd32c02aaa39b223fe8d0a0e5c4f27ead9083c756cc24585fe77225b41b697c938b018e2ac67ac5a20c00100000000000000000000000000000000000000000000000000212a120e5ff80003000360594a405d53811d3bc4766596efd80fd545a2706b175474e89094c44da98b954eedeac495271d0f01000002055475920a8c93cffb64d039a8205f7acc7722d364aa3364f17a4d01c6f1751fd97c2bd3d7e7f1d503e50…	16113066	0x284a38428260c9b61914e52e63f3acea6bdb58e17c00e49c9a4ce8a15fe9f4e8
926	0xd9c339e252b6140c035948d533011286ebf957fd8d92df1e5c71b8344e5f569a	0x925b5d952fb5d6bc419d99e1d8c2b7e7e1344937	0x881d40237659c251811cec9c364ef91dc08d300c	1.4e+17	0x5f5755290000000000000000000000000000000000000000000000000000000000000080000000000000000000000000000000000000000000000000000000000000000000000000000000000000000000000000000000000000000001f161421c8e000000000000000000000000000000000000000000000000000000000000000000c00000000000000000000000000000000000000000000000000000000000000017616972737761704c696768743346656544796e616d696300000000000000000000000…	16113066	0x284a38428260c9b61914e52e63f3acea6bdb58e17c00e49c9a4ce8a15fe9f4e8
928	0x214ebc3e35b41688dc46f2fe4670a5d6735fac47f78861f8f941aa8f9e54dfd4	0xbeeb460081c1e3820a6afaa309c6d3c45f465335	0xc05177d3a85109702c8c36e677ec30763ab7dffb	1.5e+16	0x	16113066	0x284a38428260c9b61914e52e63f3acea6bdb58e17c00e49c9a4ce8a15fe9f4e8
929	0x17523a512baff78e3e8d869a910eba2a76d30e98f92e55b21ae6fdddac7d9eda	0x6887246668a3b87f54deb3b94ba47a6f63f32985	0x5e4e65926ba27467555eb562121fac00d24e9dd2	0	0xd0f893440002b47d7e0000940000050000000000000000000000000000000000002e00000000638cdec40000f5dd7300002800000200638cded30000f5dd7300002a00000000638cded30000f5dd7400001200000000638cdee20000f5dd74789cec7d793c95ddf6f8738e799e8794799e653aa60cc94c940c21c91052c89431c7900a194f52a4c7907996a922322594a9848ca18c2142197e9f4beff7722fe7c9dbfb7ebbdfdfe7aebfcef3acb3f65e7b3f7bafbdf6da6bad0d0017972fb006901c95f73f898…
931	0xbefdbfdaf0046a28ba7b9faa560a841df14f3aa32adc6855931f917313cb293b	0xc4ac6dff8ef4296ce36b428b9045d8b85e8359e1	0xbc4e8115e17d96cfd8e3ecef2b0d6e19d00f70b2	0	0xa22cb4650000000000000000000000001e0049783f008a0085193e00003d00cd54003c710000000000000000000000000000000000000000000000000000000000000001	16113066	0x284a38428260c9b61914e52e63f3acea6bdb58e17c00e49c9a4ce8a15fe9f4e8
932	0x2f822177019b16b683b543cceed15f78203c40323f9e54e2ad50da3cac5bd3eb	0x8d381481be81184259dd6e3daef415bccf71a610	0xdef1c0ded9bec7f1a1670819833240f027b25eff	0	0x7d49ec1a000000000000000000000000c02aaa39b223fe8d0a0e5c4f27ead9083c756cc2000000000000000000000000b8c77482e45f1f44de1745f52c74426c631bdd520000000000000000000000000000000000000000000000000522810a26e500000000000000000000000000000000000000000000000000000eabb90c4b25600000000000000000000000000000000000000000000000000000000000000000000000000000000000000000008d381481be81184259dd6e3daef415bccf71a61000000…	16113066	0x284a38428260c9b61914e52e63f3acea6bdb58e17c00e49c9a4ce8a15fe9f4e8
933	0xf950fb2be567cfc2ca21c97b61d6334143e9d099f7b239ac009ad25812060250	0x71660c4005ba85c37ccec55d0c4493e66fe775d3	0xf5604092095d6a190805fb486d5a9a92dd9b0622	2.61e+17	0x	16113066	0x284a38428260c9b61914e52e63f3acea6bdb58e17c00e49c9a4ce8a15fe9f4e8
935	0xa74df620ad3e8e36719dabd1fdec80af802e583a041385df98e3777063b8cfaa	0xf89d7b9c864f589bbf53a82105107622b35eaa40	0xf034873b1ef09d9a0b8e03904c66ad0813391df3	2e+16	0x	16113066	0x284a38428260c9b61914e52e63f3acea6bdb58e17c00e49c9a4ce8a15fe9f4e8
939	0x3f578ffc48da5ed3e8eeda9d722baaf148c23a875b80adcd55271b30bcdcbfcb	0xfbb1e73d7868c5a963335409ffc66b8e6805b55a	0x6468e79a80c0eab0f9a2b574c8d5bc374af59414	0	0x095ea7b3000000000000000000000000d71751becd1033c2164b6745f9985e1ca029d3da0000000000000000000000000000000000000000bec27bed1b86aac481f00000	16113066	0x284a38428260c9b61914e52e63f3acea6bdb58e17c00e49c9a4ce8a15fe9f4e8
940	0xe56b5ee5b57d27cd6e69c3155ced02b0892dc53c3fac574683717c41d26e4c6e	0x7830c87c02e56aff27fa8ab1241711331fa86f43	0xa9d1e08c7793af67e9d92fe308d5697fb81d3e43	0	0x1a1da075000000000000000000000000000000000000000000000000000000000000004000000000000000000000000000000000000000000000000000000000000156940000000000000000000000000000000000000000000000000000000000000012000000000000000000000000896e616cc85ce48e5c8b9e8349aff2c688a6d72d00000000000000000000000000000000000000000000000000013729e1a56e000000000000000000000000007fb27199f61271dbe8b7060a815b8626fe62998b00000…	16113066	0x284a38428260c9b61914e52e63f3acea6bdb58e17c00e49c9a4ce8a15fe9f4e8
941	0xdeff317e4dff9093edc47dc3ca01706ffbeeb6b6ea5b978566a1b4cfb798f568	0x98337627a984cf34924755f7d462177b916f3bc8	0x00000000c2cf7648c169b25ef1c217864bfa38cc	0	0x000000ff0000000000000000000000000000000000000000000000000000000000000020000000000000000000000000000000000000000000000000000000000000019b0000010000000000005a34a38fc00a00000306006901c02aaa39b223fe8d0a0e5c4f27ead9083c756cc26b175474e89094c44da98b954eedeac495271d0f60594a405d53811d3bc4766596efd80fd545a2700000000000000000073ced8851f13f4000000000010001f4055475920a8c93cffb64d039a8205f7acc7722d300007e010…	16113066	0x284a38428260c9b61914e52e63f3acea6bdb58e17c00e49c9a4ce8a15fe9f4e8
944	0xc96d2b504ab2961ac74a104d67f6bfaae850147f7bb4d2cbbba95b3069b44a43	0x77b749fd09f0978fe6ef28244dc8a919497624df	0xdad9f0bcfb9f9a7f5e4ea708f99951d40fa8c3dd	1.42e+16	0x	16113066	0x284a38428260c9b61914e52e63f3acea6bdb58e17c00e49c9a4ce8a15fe9f4e8
945	0x5f2894190a1852f90655d7c2ebdff5363afb8498ecc9cdbdd1b6a56af8798301	0x28c6c06298d514db089934071355e5743bf21d60	0x6b08f52659c8313135ae67f8f5205cc8cc9934cb	2.25e+17	0x	16113066	0x284a38428260c9b61914e52e63f3acea6bdb58e17c00e49c9a4ce8a15fe9f4e8
946	0xb1d9083360524f511a38fefd9b0e54c409d4789c19271fa8100568268f9f5f7a	0x4976a4a02f38326660d17bf34b431dc6e2eb2327	0xe61abe5febb8bac5eef8fd612e4c9950a284a02b	1e+17	0x	16113066	0x284a38428260c9b61914e52e63f3acea6bdb58e17c00e49c9a4ce8a15fe9f4e8
947	0xa146e33de63ff2a8752f3987ce30dff250652aefbcb1671284c84b36d535ebb7	0xe93685f3bba03016f02bd1828badd6195988d950	0x902f09715b6303d4173037652fa7377e5b98089e	0	0x252f7b01000000000000000000000000000000000000000000000000000000000000006e000000000000000000000000296f55f8fb28e498b858d0bcda06d955b2cb3f9700000000000000000000000000000000000000000000000000000000001263082ca27e32f7e7e9db91469512b7c1eab3c683588118d5d7ee1faad7a7e4968a2349410a3af1990fee98c13627460531d127bad1eff097746e2881f5da0f90081400000000000000000000000000000000000000000000000000000000000000c000000…	16113066	0x284a38428260c9b61914e52e63f3acea6bdb58e17c00e49c9a4ce8a15fe9f4e8
948	0xf0bacf5a334b1774c927604e5c2a61d546c0f59b70205eded355a0784fd72e70	0x1be210e7990eff6c07cb8cadcb9d077063ac3614	0x792f2f1984b4d5801636fa5f1b7201d1c4066422	2100000000000000	0x	16113066	0x284a38428260c9b61914e52e63f3acea6bdb58e17c00e49c9a4ce8a15fe9f4e8
949	0xe9c8f4b87ee09fe2eec75c1031ebe68a6bdea32d5953ed4aa12324b3cbc6d2ad	0x0ff1efb8aa061808550cf245836f37475a4317fd	0x2b6ad2387ff0464cb32b579c7d2cb2126510ef58	0	0xedc9af95000000000000000000000000000000000000000000000000597266b21b60cd32c02aaa39b223fe8d0a0e5c4f27ead9083c756cc24585fe77225b41b697c938b018e2ac67ac5a20c00100000000000000000000000000000000000000000000000000212a120e5ff80003000360594a405d53811d3bc4766596efd80fd545a2706b175474e89094c44da98b954eedeac495271d0f01000002055475920a8c93cffb64d039a8205f7acc7722d364aa3364f17a4d01c6f1751fd97c2bd3d7e7f1d503e50…	16113066	0x284a38428260c9b61914e52e63f3acea6bdb58e17c00e49c9a4ce8a15fe9f4e8
950	0x8a47448aab03a49b74d6056389213cf66a8678815fd8152df7e270323f27fbaf	0x7725060fdd655630a66d635679a7b61daccf4ea0	0xac338d9faac562df26d702880c796e1024e2698a	3e+18	0x	16113066	0x284a38428260c9b61914e52e63f3acea6bdb58e17c00e49c9a4ce8a15fe9f4e8
951	0x3e9a97cf2fb4c209fe546678818ee197c1347d33b777aadfd2530be35eda37ee	0x1be210e7990eff6c07cb8cadcb9d077063ac3614	0x1fe72ca6498e85d4e265899b30ba07deab6f3f28	2100000000000000	0x	16113066	0x284a38428260c9b61914e52e63f3acea6bdb58e17c00e49c9a4ce8a15fe9f4e8
952	0xc04d3f772c6c21546bb12707c5fdb811d6d76a992ec25242fd0880b49f324493	0x46340b20830761efd32832a74d7169b29feb9758	0xf411903cbc70a74d22900a5de66a2dda66507255	0	0xa9059cbb0000000000000000000000005143008fec8f52e750843e305e0a493e067515c4000000000000000000000000000000000000000000000a266e73ae3378ac0000	16113066	0x284a38428260c9b61914e52e63f3acea6bdb58e17c00e49c9a4ce8a15fe9f4e8
953	0x041065cf2b82ac05190c0fb841afbe0ce321141967bb5f93fff1a2f1172856e6	0x68205f4506f3172e03b190285b5c1e45905e5e3c	0x68b3465833fb72a70ecdf485e0e4c7bd8665fc45	9.68e+16	0x5ae401dc00000000000000000000000000000000000000000000000000000000638cdf5f000000000000000000000000000000000000000000000000000000000000004000000000000000000000000000000000000000000000000000000000000000020000000000000000000000000000000000000000000000000000000000000040000000000000000000000000000000000000000000000000000000000000016000000000000000000000000000000000000000000000000000000000000000e442712…	16113066	0x284a38428260c9b61914e52e63f3acea6bdb58e17c00e49c9a4ce8a15fe9f4e8
956	0xb2945d88ff0b7325b2d6b9ad1491a83d06c0db9dfbc7185a8d65cfbb234d3cde	0x443dff63c2634ac5ef5aa5bfbd194a503c734de4	0xc2a54f74ebbbba5ed92d6a0b5dcb0b0ffb96f36e	0	0x8bd8554f00000000000000000000000000000000000000000000000000000000000000c000000000000000000000000000000000000000000000000000000000000001000000000000000000000000000000000000000000000000000000000000000140000000000000000000000000000000000000000000000000000000000000018000000000000000000000000000000000000000000000000000000000000004a000000000000000000000000000000000000000000000000000000000000004c000000…	16113066	0x284a38428260c9b61914e52e63f3acea6bdb58e17c00e49c9a4ce8a15fe9f4e8
957	0x868ebb4d0ecdca2542884ee6c0187faf67b882b348111fc556f590e3a112310e	0x312238ecf6b8ec69645912a5d67bcefc7a9a82f5	0x9ade9ea6fd4fca08e27db8d2b607e3e30bcb0ab2	0	0x864e01810000000000000000000000000000000000000000000000000000000000000001	16113066	0x284a38428260c9b61914e52e63f3acea6bdb58e17c00e49c9a4ce8a15fe9f4e8
958	0x34f71397ebb1661ed8252447843d1e577ff8551cca4fae3634af2ea0a8a6b880	0x0124d0fa0dfb1430dfcff16ec6a96945e7a0bc10	0x626c27bcb7739ca923ff1c592dd1efebd4f7c829	0	0xca8bd1f90300010026f22710055475920a8c93cffb64d039a8205f7acc7722d36b175474e89094c44da98b954eedeac495271d0f18000127102710d1ec5e215e8148d76f4460e4097fd3d5ae0a355864aa3364f17a4d01c6f1751fd97c2bd3d7e7f1d514010001f4271060594a405d53811d3bc4766596efd80fd545a270c02aaa39b223fe8d0a0e5c4f27ead9083c756cc2083cda0b7e4e9d10000a01b638ebdd190c20000000000000	16113066	0x284a38428260c9b61914e52e63f3acea6bdb58e17c00e49c9a4ce8a15fe9f4e8
959	0xd3b106a91326c1a1f627855ecb41d34b724e5c3a1aa363a7d0ffea21dc4e7630	0x71660c4005ba85c37ccec55d0c4493e66fe775d3	0x8ff152c31c9ff5c6ba7667962f923ab0cb9b5c1c	841000000000000	0x	16113066	0x284a38428260c9b61914e52e63f3acea6bdb58e17c00e49c9a4ce8a15fe9f4e8
960	0xafa3eb2bef30043d515241ac1774cedaab9f910b516a2e17fb31c564f1fd6908	0xf89d7b9c864f589bbf53a82105107622b35eaa40	0xdac17f958d2ee523a2206206994597c13d831ec7	0	0xa9059cbb000000000000000000000000c0e5f879d9c6667942b0821fc8a8194053682a39000000000000000000000000000000000000000000000000000000000bf08e20	16113066	0x284a38428260c9b61914e52e63f3acea6bdb58e17c00e49c9a4ce8a15fe9f4e8
963	0xee9d4ecce3f5980d84020257f27e5f3c273dfd706654c83d27e2e6fba946f2ca	0x503828976d22510aad0201ac7ec88293211d23da	0xfd52e38ff3e8f22d5484b130442e5fcacf0d35b3	3570000000000000	0x	16113066	0x284a38428260c9b61914e52e63f3acea6bdb58e17c00e49c9a4ce8a15fe9f4e8
965	0x0a0da6727d10442f4e9b0d435e76c1bef6ed2020194665c063df6fd96b5d9415	0x72f5e9eb687c4fda81f3f4e305ad1ab0ab4a4560	0xb1690c08e213a35ed9bab7b318de14420fb57d8c	5000000000000000	0x454a2ab3000000000000000000000000000000000000000000000000000000000013b096	16113066	0x284a38428260c9b61914e52e63f3acea6bdb58e17c00e49c9a4ce8a15fe9f4e8
966	0x39d21fae2c186f1540f9df7ceadd55e62d30b43c4e6c82c10abb1a5d4cb25c68	0xf7858da8a6617f7c6d0ff2bcafdb6d2eedf64840	0x4712fd8f3d1b607d2fbe0105b68fe79b55be67a6	5e+16	0x	16113066	0x284a38428260c9b61914e52e63f3acea6bdb58e17c00e49c9a4ce8a15fe9f4e8
968	0xeb002b29b782c062076fd6384fa8cdeeef75eb024be54a6b0d647b96d2134766	0x96f235b899fe1f149c139394a6cddb0666d2ae33	0x00000000006c3852cbef3e08e8df289169ede581	0	0xe7acab24000000000000000000000000000000000000000000000000000000000000008000000000000000000000000000000000000000000000000000000000000006600000007b02230091a7ed01230072f7006a004d60a8d4e71d599b8104250f0000000000000000000000000000000000000000000000000000000000000000000000000000000000000000000000000000000000000000000000000000000000a0000000000000000000000000000000000000000000000000000000000000000100000…	16113066	0x284a38428260c9b61914e52e63f3acea6bdb58e17c00e49c9a4ce8a15fe9f4e8
969	0x63681068ae1bbc199cfbb1972bb6ac4db6656da6b0124e5abca6af2437b50fff	0x0acdd0fefb605957dfcba4816d77c43dec3f1f79	0x00e08fa930da4c73cd043f5e03030e0086295211	3000000000000000	0x	16113066	0x284a38428260c9b61914e52e63f3acea6bdb58e17c00e49c9a4ce8a15fe9f4e8
971	0x3eddc35f4550b890036f03fa83b8f195b5ded6666db98e830a42f36d9cba1561	0xa6c0f7bde119930fb919ed02f8155887ecf0d756	0xb43e886c7d7d4b3eda65e016b5bcef56548aeb7b	1e+16	0x0115e1c6000000000000000000000000a6c0f7bde119930fb919ed02f8155887ecf0d7560000000000000000000000000000000000000000000000000000000000000001	16113066	0x284a38428260c9b61914e52e63f3acea6bdb58e17c00e49c9a4ce8a15fe9f4e8
973	0xff08438dd4b92dd252115d737a90c5ef6168494eacda1031330fc6de2f2c12c7	0xf42ed7184f3bdd07b0456952f67695683afd9044	0xbe9a129909ebcb954bc065536d2bfafbd170d27a	0	0x55a2ba68000000000000000000000000ee3e5c81a384bf413eba5446769555c5bbaff1ab000000000000000000000000a0b86991c6218b36c1d19d4a2e9eb0ce3606eb480000000000000000000000000000000000000000000000000000000004c4b40000000000000000000000000000000000000000000000000000000000076f1145	16113066	0x284a38428260c9b61914e52e63f3acea6bdb58e17c00e49c9a4ce8a15fe9f4e8
974	0xfcc7057b44c301e3a6f5adf1355c0d97aa936b4bcf5251cec36a620acb648bd1	0x4e5b2e1dc63f6b91cb6cd759936495434c7e972f	0xdac17f958d2ee523a2206206994597c13d831ec7	0	0xa9059cbb000000000000000000000000dd5cd65a002fc26267f203473645a2231e4af72e00000000000000000000000000000000000000000000000000000001f825dfd8	16113066	0x284a38428260c9b61914e52e63f3acea6bdb58e17c00e49c9a4ce8a15fe9f4e8
975	0x6f63a39689e69bc3f1e46977252e505487e232c03b581280c72a8b582c429f5a	0x292f04a44506c2fd49bac032e1ca148c35a478c8	0xdac17f958d2ee523a2206206994597c13d831ec7	0	0x23b872dd0000000000000000000000008d6850c068ac3691146e26d1691b8505626822c5000000000000000000000000292f04a44506c2fd49bac032e1ca148c35a478c8000000000000000000000000000000000000000000000000000000003b9aca00	16113066	0x284a38428260c9b61914e52e63f3acea6bdb58e17c00e49c9a4ce8a15fe9f4e8
976	0xe1eb876276efc8f14092190fe757ccb589d3542d6fa8a53cc529724aee6635cb	0xab97925eb84fe0260779f58b7cb08d77dcb1ee2b	0x55f2e4a2a6ac18e2db91de5f315d329fa1881764	8e+16	0x	16113066	0x284a38428260c9b61914e52e63f3acea6bdb58e17c00e49c9a4ce8a15fe9f4e8
977	0xab647f0c0ea9e5ae036481d77c56d1281f5452836233da0e8d436a8ab04fb5c8	0x46340b20830761efd32832a74d7169b29feb9758	0xdac17f958d2ee523a2206206994597c13d831ec7	0	0xa9059cbb000000000000000000000000e1b939b8cac03d157bef01530cc99c838391625d000000000000000000000000000000000000000000000000000000000daf9210	16113066	0x284a38428260c9b61914e52e63f3acea6bdb58e17c00e49c9a4ce8a15fe9f4e8
978	0xacca7a65ca457288bd5809a99ed56b054bf315d40f01c47ad6207180c588e932	0xea86d107d61b383df943cd9f2748a3b9d018cf94	0x7a250d5630b4cf539739df2c5dacb4c659f2488d	0	0x791ac947000000000000000000000000000000000000000000016860b000b37343aec86900000000000000000000000000000000000000000000000000134770af58e85700000000000000000000000000000000000000000000000000000000000000a0000000000000000000000000ea86d107d61b383df943cd9f2748a3b9d018cf9400000000000000000000000000000000000000000000000000000000638ce145000000000000000000000000000000000000000000000000000000000000000200000…	16113066	0x284a38428260c9b61914e52e63f3acea6bdb58e17c00e49c9a4ce8a15fe9f4e8
979	0x9c62c3c2d55a0c9fa29a677a67782af115fafeba7cad3465c20120412b89a681	0x7166b6f91c868fab5d97ffe8ad53190bb0ed75de	0x68b3465833fb72a70ecdf485e0e4c7bd8665fc45	0	0x5ae401dc00000000000000000000000000000000000000000000000000000000638ce5e30000000000000000000000000000000000000000000000000000000000000040000000000000000000000000000000000000000000000000000000000000000100000000000000000000000000000000000000000000000000000000000000200000000000000000000000000000000000000000000000000000000000000104472b43f3000000000000000000000000000000000000000000000000000016bcc41e9…	16113066	0x284a38428260c9b61914e52e63f3acea6bdb58e17c00e49c9a4ce8a15fe9f4e8
981	0x55d39ca2354c9298441f9c3c4eefece115500f465bede6b9346f5264b87faa45	0xcc09d6d8d704782e0b3b489038e80e4baa08622e	0xc5424b857f758e906013f3555dad202e4bdb4567	10000000000000	0x3df0212400000000000000000000000000000000000000000000000000000000000000000000000000000000000000000000000000000000000000000000000000000001000000000000000000000000000000000000000000000000000009184e72a0000000000000000000000000000000000000000000000000000000090a9e45ceaa	16113066	0x284a38428260c9b61914e52e63f3acea6bdb58e17c00e49c9a4ce8a15fe9f4e8
982	0x37fbd5d2ca03e47680c0720ca1e94718dbec4b523239e85dc7edd1483af7b29e	0xcf5ab745716bf26ca9f04590026198409a7899c2	0x3636b81045f89a08299a81ff8ae02c73558088be	8.05e+16	0x	16113066	0x284a38428260c9b61914e52e63f3acea6bdb58e17c00e49c9a4ce8a15fe9f4e8
983	0x49e136bb83444709afef43dc1bdbcd4cd8dc9741d6a7b5db77ac8ec982f1a3ae	0xcd92beea441abd5d3a8fc166a5535ab3ab258932	0x5eeaa2dcb23056f4e8654a349e57ebe5e76b5e6e	0	0x095ea7b3000000000000000000000000881d40237659c251811cec9c364ef91dc08d300cffffffffffffffffffffffffffffffffffffffffffffffffffffffffffffffff	16113066	0x284a38428260c9b61914e52e63f3acea6bdb58e17c00e49c9a4ce8a15fe9f4e8
986	0xc1ab670a34b4b7c02d9ad03c99bb7d73516e04903fdfb2061155280530f71e3d	0x75e89d5979e4f6fba9f97c104c2f0afb3f1dcb88	0xdc1e5e4b8adacb60dc1726a66885cb3343eb654d	8.56e+16	0x	16113066	0x284a38428260c9b61914e52e63f3acea6bdb58e17c00e49c9a4ce8a15fe9f4e8
987	0x061182797a45a902857c0ce176522cc3fb7a06778ac0c56e1454ddcf7890c869	0xddfabcdc4d8ffc6d5beaf154f18b778f892a0740	0x9bf32a69b6c5e4b17e5d0363016b65e257898e56	7930000000000000	0x	16113066	0x284a38428260c9b61914e52e63f3acea6bdb58e17c00e49c9a4ce8a15fe9f4e8
988	0xddc8457d0d7759eea7eb11c5540d57655cd2c7c22a1b9a72adfed0fbda0e83e4	0x2f5245fc1511325c207976a98f90819a01dc6d66	0xc1e71b6a8f30ad0a01647b6af165806439818755	1.18e+18	0x	16113066	0x284a38428260c9b61914e52e63f3acea6bdb58e17c00e49c9a4ce8a15fe9f4e8
990	0x5d757507a7ddfc18d99912fe167b034bb4b6f2c3d5be356d600e4580c1b84709	0xcddf909c8771327caa38a8eb97255be6b8d6d13f	0x9d1f3b943914a2d7b6f374b888c5965261be19e8	2.13e+17	0x	16113066	0x284a38428260c9b61914e52e63f3acea6bdb58e17c00e49c9a4ce8a15fe9f4e8
993	0xa49465e92ad52b32810aeb87448b65759451707178563f424f84e39f00af8290	0xab97925eb84fe0260779f58b7cb08d77dcb1ee2b	0x9fc3819ce84ef72fb33f31a59b32e72cd332b48c	8e+16	0x	16113066	0x284a38428260c9b61914e52e63f3acea6bdb58e17c00e49c9a4ce8a15fe9f4e8
994	0xe6f602eb7d0bea5c0046bc086dfc4866613a37236349a319a60b32ed53a4941a	0x1be210e7990eff6c07cb8cadcb9d077063ac3614	0x50c0fddbd99ef202da50e837b6fe75f464c2c744	2100000000000000	0x	16113066	0x284a38428260c9b61914e52e63f3acea6bdb58e17c00e49c9a4ce8a15fe9f4e8
996	0x20e6c35662a27a7ac2f6fe7e25555d0e47e017c6cc77658e7b945da7b4cb4121	0x595063172c85b1e8ac2fe74fcb6b7dc26844cc2d	0xb1dc91db098f22fecfa064d9c843fba4b39a1a33	3.05e+16	0x	16113066	0x284a38428260c9b61914e52e63f3acea6bdb58e17c00e49c9a4ce8a15fe9f4e8
999	0x3c6dd1d5172483aeec9c86d36d84d5e9af2ada642bee467f7893302be56c75c0	0x6ee7bd03f23e819f1df0d3800d04a99ec86dd1fa	0x76f4eed9fe41262669d0250b2a97db79712ad855	0	0xf17a454600000000000000000000000000000000000000000000000000000000000000c000000000000000000000000000000000000000000000000000000000000001a00000000000000000000000000000000000000000000000000000000158f13e4600000000000000000000000000000000000000000000000000000001557e30da0000000000000000000000001d64fb0ffa8362b2e1ee7ee03929159551eab26e000000000000000000000000000000000000000000000000000000000000022000000…	16113066	0x284a38428260c9b61914e52e63f3acea6bdb58e17c00e49c9a4ce8a15fe9f4e8
1000	0x21030befbff811afc9690f318b70c86cd4c3ed188303a67e8bab13cc6a6abb19	0xf1a5bf4b2c5b93ae820bc55e127b830bc0bf4036	0x9d36e5f12c151ad79c3dfc1e2850ada889da918c	3680000000000000	0x	16113066	0x284a38428260c9b61914e52e63f3acea6bdb58e17c00e49c9a4ce8a15fe9f4e8
1001	0xd6abf0b887334bc03ea4d5a9be0a37d3c27a69f4aee9330e533be885a0295d39	0xc36f427c53202a9759f774fa2451b6709d0f9719	0x477f885f6333317f5b2810ecc8afadc7d5b69dd2	0	0x42842e0e000000000000000000000000c36f427c53202a9759f774fa2451b6709d0f9719000000000000000000000000c6446e94ca88b80f16ac18a6edccb1129eebfcd200000000000000000000000000000000000000000000000000000000000020e6	16113066	0x284a38428260c9b61914e52e63f3acea6bdb58e17c00e49c9a4ce8a15fe9f4e8
1002	0x6f4468102849fcc5ff119b0b51d3fa92914000cbe32cc2a80de5ddaab78135c7	0x1be210e7990eff6c07cb8cadcb9d077063ac3614	0x3b60fc17b3f401f35b1245076f40dd7a7bddc704	2100000000000000	0x	16113066	0x284a38428260c9b61914e52e63f3acea6bdb58e17c00e49c9a4ce8a15fe9f4e8
1003	0xf60642f376b3a13c6ebad33df18f4786b24a0922d42e2292ad3f46b0d4b70cef	0xc276cd4991bfbdaebd24eb604071b2f64f986da2	0x42fe737749683595e4315b443eadcc9346a994d9	0	0x42842e0e000000000000000000000000c276cd4991bfbdaebd24eb604071b2f64f986da2000000000000000000000000f82efd982ff5980166032f18c7082f39fb6cd32b000000000000000000000000000000000000000000000000000000000000b4a5360c6ebe	16113066	0x284a38428260c9b61914e52e63f3acea6bdb58e17c00e49c9a4ce8a15fe9f4e8
1005	0x082e6cea0f5c42096a5aa876a1dc6c9098c4a0d05b237773572d20bd133aabb7	0x1be210e7990eff6c07cb8cadcb9d077063ac3614	0xe56f703def843cb1fe3a1a854ca59782eea298fb	2100000000000000	0x	16113066	0x284a38428260c9b61914e52e63f3acea6bdb58e17c00e49c9a4ce8a15fe9f4e8
1006	0x305af3530e09e146ea9c2a1dfb1e35fb2ac756b1fdc1755caa34886a8fe00333	0x55fe002aeff02f77364de339a1292923a15844b8	0xa0b86991c6218b36c1d19d4a2e9eb0ce3606eb48	0	0xa9059cbb000000000000000000000000705c132dbdf62a749fbdd7f1422114a1f11e9060000000000000000000000000000000000000000000000000000000000487ab00	16113066	0x284a38428260c9b61914e52e63f3acea6bdb58e17c00e49c9a4ce8a15fe9f4e8
1007	0xafb049b397ce73e4f7ca00579d3b1efdd0715f559aeb91e134d1451b3c4b4406	0xa4ba90fd7a3fa6830a8cdcc18e00309ba8c40c4b	0xe27d4ed355e5273a3d4855c8e11bc4a8d3e39b87	0	0x097da1f800000000000000000000000000000000000000000000000000000000000000000000000000000000000000000000000000000000000000000000000000000080000000000000000000000000fb209827c58283535b744575e11953dcc4bead88000000000000000000000000000000000000000000000000000000000000000000000000000000000000000000000000000000000000000000000000000000445eb405d50466dd5d7cb88484962a3212fa8122d8a693b74c41938747ed047139a8671…	16113066	0x284a38428260c9b61914e52e63f3acea6bdb58e17c00e49c9a4ce8a15fe9f4e8
1008	0x9b73a31f54b616791827563d9defb7cb70ab60771f90bb9cf7361c02159f4504	0xc15add7eb1ba708bc7189cef6a4c47200b77a52b	0xeeeec6476073778077b40a73fe32e23a9876cab4	7.94e+16	0x2b66d72e000000000000000000000000000000000000000000000000000000000000002000000000000000000000000000000000000000000000000000000000000000ea65794a68624763694f694a46557a49314e694973496d74705a434936496a64684e6a526c5a6d51314c544a694e4463744e475a6a5a6931684f4463784c5445785a6d59354f5451345954646a4f434a392e436751784d6a553545674e56553051614a44686c4f44566c5a5441354c5441345a6d51744e4445344e433169596a497a4c5…	16113066	0x284a38428260c9b61914e52e63f3acea6bdb58e17c00e49c9a4ce8a15fe9f4e8
1010	0xb36585e178878ff9ef3ba6da0fe24798666acfe6e205fc8e1c2d0cbeb1bb6538	0x1be210e7990eff6c07cb8cadcb9d077063ac3614	0x59ee42bf23d1e14d27efd1c40d68f6de80f1dda8	2100000000000000	0x	16113066	0x284a38428260c9b61914e52e63f3acea6bdb58e17c00e49c9a4ce8a15fe9f4e8
1014	0x3a3c41a3536d9b3214336c4eeb2cddfa222c06fe3bc934aa3374411cabe29811	0x74bcdd2f3a6a91bd34fe6749b8b522f9ecde2e3a	0x76f4eed9fe41262669d0250b2a97db79712ad855	0	0xf17a454600000000000000000000000000000000000000000000000000000000000000c000000000000000000000000000000000000000000000000000000000000001a000000000000000000000000000000000000000000000000000000002540be40000000000000000000000000000000000000000000000000000000002524220800000000000000000000000001d64fb0ffa8362b2e1ee7ee03929159551eab26e000000000000000000000000000000000000000000000000000000000000022000000…	16113066	0x284a38428260c9b61914e52e63f3acea6bdb58e17c00e49c9a4ce8a15fe9f4e8
1015	0x4d116e8d314d560d81fbb501d2b5da53b144b78f8a126271cbbf1ae74d04ac03	0xb44f6e93c255c7342a240e221100c4c3d256122e	0x68b3465833fb72a70ecdf485e0e4c7bd8665fc45	8.46e+16	0x5ae401dc00000000000000000000000000000000000000000000000000000000638ce5ef000000000000000000000000000000000000000000000000000000000000004000000000000000000000000000000000000000000000000000000000000000020000000000000000000000000000000000000000000000000000000000000040000000000000000000000000000000000000000000000000000000000000016000000000000000000000000000000000000000000000000000000000000000e442712…	16113066	0x284a38428260c9b61914e52e63f3acea6bdb58e17c00e49c9a4ce8a15fe9f4e8
1016	0x957421f4c1f5fa3b47d3c41bfcbb6983f5a65398334e04f158837e0e8f91e312	0x6e551048cb8f6f94632206a25628807d76432126	0x00000000c2cf7648c169b25ef1c217864bfa38cc	0	0x000000ff0000000000000000000000000000000000000000000000000000000000000020000000000000000000000000000000000000000000000000000000000000019b0000010000000000005a34a38fc00a00000306006901c02aaa39b223fe8d0a0e5c4f27ead9083c756cc26b175474e89094c44da98b954eedeac495271d0f60594a405d53811d3bc4766596efd80fd545a2700000000000000000073ced8851f13f4000000000010001f4055475920a8c93cffb64d039a8205f7acc7722d300007e010…	16113066	0x284a38428260c9b61914e52e63f3acea6bdb58e17c00e49c9a4ce8a15fe9f4e8
1017	0x4c13a1148133dde639e5b79ecc21fdeb6e252d2e55da2df360f4fc5de89379fb	0xd527c5a510eb62f2598e8a9e81b976c94b30866d	0x6bb204870617784397da68e46aefa49ebfda5a85	0	0x98a6e993000000000000000000000000000000000000000000000000000000000000004000000000000000000000000000000000000000000000000000000000000001e0000000000000000000000000d527c5a510eb62f2598e8a9e81b976c94b30866d00000000000000000000000000000000000000000000000000000000000000000000000000000000000000000000000000000000000000000000000000000000000000000000000000000000000000000000000000000000000000000000000000000…	16113066	0x284a38428260c9b61914e52e63f3acea6bdb58e17c00e49c9a4ce8a15fe9f4e8
1018	0xe62aa892a89d158244ddfcd2e5c7961f45d1ba939ebc34160b5d429606b4cbc7	0x75e89d5979e4f6fba9f97c104c2f0afb3f1dcb88	0xb25c8e88f6ec88ae899dffa60da6cb901e3e037d	8.15e+16	0x	16113066	0x284a38428260c9b61914e52e63f3acea6bdb58e17c00e49c9a4ce8a15fe9f4e8
1021	0xe4309000e9e990ed1f6a29f1c0fb544c92669966bf13ce27af48c4d4fcee6fb9	0xd8aa8f3be2fb0c790d3579dcf68a04701c1e33db	0xae74faa92cb67a95ebcab07358bc222e33a34da7	0	0x98e5b12a	16113066	0x284a38428260c9b61914e52e63f3acea6bdb58e17c00e49c9a4ce8a15fe9f4e8
1022	0xaacd89752952d264b3d897d403b23c6af2b6074c4cb18dc5d3f70b52ce6777e8	0xddfabcdc4d8ffc6d5beaf154f18b778f892a0740	0x0c5cb7106af3d60dc8493a1cb09dd1306b43f27b	2e+18	0x	16113066	0x284a38428260c9b61914e52e63f3acea6bdb58e17c00e49c9a4ce8a15fe9f4e8
1024	0xff9ae056a6e84d43ec72428ca479f7e20bb89dd05998fd8f54292be6299c83cd	0x6451fc4a41bd264cf55fd0abc4b6d1853266de15	0x7492e30d60d96c58ed0f0dc2fe536098c620c4c0	0	0xefef39a10000000000000000000000000000000000000000000000000000000000000001	16113066	0x284a38428260c9b61914e52e63f3acea6bdb58e17c00e49c9a4ce8a15fe9f4e8
1025	0x917d746bdf0fc5460d65f91bb5aac85dbb07336e7c70f8a3f566a99de3e7b346	0x8f8fc242030757a135aa7275d94e909056cd68bb	0xeffc18fc3b7eb8e676dac549e0c693ad50d1ce31	10000000000000	0x474cf53d0000000000000000000000007d2768de32b0b80b7a3454c06bdac94a69ddc7a90000000000000000000000008f8fc242030757a135aa7275d94e909056cd68bb0000000000000000000000000000000000000000000000000000000000000000	16113066	0x284a38428260c9b61914e52e63f3acea6bdb58e17c00e49c9a4ce8a15fe9f4e8
1026	0x6dc51a97696d696c2430862a089bbb2b6dedc086ad6b331000ec415086ce3fc3	0xab97925eb84fe0260779f58b7cb08d77dcb1ee2b	0x649479c4ac80694fd8863614bb3a4c82e11688c8	8e+16	0x	16113066	0x284a38428260c9b61914e52e63f3acea6bdb58e17c00e49c9a4ce8a15fe9f4e8
1027	0x79938f59861adf83f90196e25aee2cf7d9f4a1b0968c619db67356763457dbde	0x6dfc34609a05bc22319fa4cce1d1e2929548c0d7	0xb42004d82ab1d7b78f4cb5f91388d066cde0542a	1.79e+17	0x	16113066	0x284a38428260c9b61914e52e63f3acea6bdb58e17c00e49c9a4ce8a15fe9f4e8
1028	0x72723fd7d70bed76936edf3668cb3ce9be29df37ffd62fc8b74ac9055dd682ce	0x7830c87c02e56aff27fa8ab1241711331fa86f43	0xa9d1e08c7793af67e9d92fe308d5697fb81d3e43	0	0xca350aa60000000000000000000000000000000000000000000000000000000000000040000000000000000000000000000000000000000000000000000000000003d0900000000000000000000000000000000000000000000000000000000000000009000000000000000000000000a0b86991c6218b36c1d19d4a2e9eb0ce3606eb48000000000000000000000000b7d6b8d4c5bac61d3a3065ccfae4253de36fc7ec000000000000000000000000000000000000000000000000000000000bdc576b00000…	16113066	0x284a38428260c9b61914e52e63f3acea6bdb58e17c00e49c9a4ce8a15fe9f4e8
1030	0x4917c37c9f5e76c9e3d925310642eb8997efab4e28436bc5d4797eec0c0e49e5	0x963737c550e70ffe4d59464542a28604edb2ef9a	0x400cb79b5d98967464e38688880b2f5d6ef753eb	5.36e+17	0x	16113066	0x284a38428260c9b61914e52e63f3acea6bdb58e17c00e49c9a4ce8a15fe9f4e8
1032	0x7699d0e91754bdfbb76541ea592db454fbc22c5c11d49395bd28e54f0b7c6401	0x673eca746bc792addd1fe7a69b79651ea641a6b7	0x9a271209330441974014cadac28a24bce1c44389	2000000000000000	0x	16113066	0x284a38428260c9b61914e52e63f3acea6bdb58e17c00e49c9a4ce8a15fe9f4e8
1033	0x9314c0b8126e00a1a171f0180c6ed08c24ca52fe2e46725dc115b8e312323ee1	0x46340b20830761efd32832a74d7169b29feb9758	0xdac17f958d2ee523a2206206994597c13d831ec7	0	0xa9059cbb000000000000000000000000f1601c311d344ee09c1ffc2e9aa5c8ef8e7898bd0000000000000000000000000000000000000000000000000000000042c1d800	16113066	0x284a38428260c9b61914e52e63f3acea6bdb58e17c00e49c9a4ce8a15fe9f4e8
1034	0x38d0ced3da75d4a923d15cffffdfc608fb9b2990fd95d34d750d41f07d374b8d	0x97972fa6d980aa9b93d1b584541055840302de05	0x423a5c7eafbd0d6b365d730995fbf3c75f8dece6	6000000000000000	0x	16113066	0x284a38428260c9b61914e52e63f3acea6bdb58e17c00e49c9a4ce8a15fe9f4e8
1037	0xb5758110ca619c6955508ae77a195b92d56e607494b6fa3be16c973062bf2c4e	0xfce79650875b5c8d6f733a2423a9ef682ac5d249	0x1111111254eeb25477b68fb85ed929f73a960582	0	0x0502b1c50000000000000000000000006f259637dcd74c767781e37bc6133cd6a68aa1610000000000000000000000000000000000000000000000040eac3f4c1ee42e3a000000000000000000000000000000000000000000000000056bcca087cbdc100000000000000000000000000000000000000000000000000000000000000080000000000000000000000000000000000000000000000000000000000000000140000000000000003b6d034026ce49c08ee71aff0c43db8f8b9bea950b6cdc67e26b9…	16113066	0x284a38428260c9b61914e52e63f3acea6bdb58e17c00e49c9a4ce8a15fe9f4e8
1038	0x252f954e8ea769e36f6aa199bb26ddf56d4f421d9814c3461b75b305067ec80e	0xd0701bfdb70f69c7b1855db1099c8abbecaf9310	0x23f0dcecfe50f70d0c87578fd6a14f59900ab5e1	0	0xa78f9d1800000000000000000000000000000000000000000000000000000000000008cf	16113066	0x284a38428260c9b61914e52e63f3acea6bdb58e17c00e49c9a4ce8a15fe9f4e8
1039	0xcb6bae6c5193267e7109bef381436d2d91f82c5ae166199ad05be434cf296667	0xcd92beea441abd5d3a8fc166a5535ab3ab258932	0x881d40237659c251811cec9c364ef91dc08d300c	0	0x5f57552900000000000000000000000000000000000000000000000000000000000000800000000000000000000000005eeaa2dcb23056f4e8654a349e57ebe5e76b5e6e00000000000000000000000000000000000000000000015f4810a37d1340000000000000000000000000000000000000000000000000000000000000000000c000000000000000000000000000000000000000000000000000000000000000136f6e65496e6368563446656544796e616d69630000000000000000000000000000000…	16113066	0x284a38428260c9b61914e52e63f3acea6bdb58e17c00e49c9a4ce8a15fe9f4e8
1040	0xf2992f146527b57839ac066d0495b0634c1648c49c9681255f910803592f0fc7	0x67b0421ca6b052692a828b271bfa8f7eeb6822d3	0x4a220e6096b25eadb88358cb44068a3248254675	0	0xa9059cbb0000000000000000000000001c9d541b126144e185d502ce39b1982c74f382e8000000000000000000000000000000000000000000000000071a5de07f505080	16113066	0x284a38428260c9b61914e52e63f3acea6bdb58e17c00e49c9a4ce8a15fe9f4e8
1041	0x3248320c57d11642a55dba9b51ff8040ce2d3d530993b25391c77cf4af6e4f35	0x46340b20830761efd32832a74d7169b29feb9758	0x761d38e5ddf6ccf6cf7c55759d5210750b5d60f3	0	0xa9059cbb0000000000000000000000005faa2429fc04fc2dcf54e5a9194a2f8d6a8a3ea2000000000000000000000000000000000000000001a5dcb373dcf81a65640000	16113066	0x284a38428260c9b61914e52e63f3acea6bdb58e17c00e49c9a4ce8a15fe9f4e8
1042	0x907b59f4b91197cf637c5d058af28906f3f774adfc482238bedaa3c15d17c9f8	0x2db1d8cdf1abe8c70b531a790cdf2ff38aecf652	0xa0b86991c6218b36c1d19d4a2e9eb0ce3606eb48	0	0xa9059cbb00000000000000000000000044b3d93cdf294665175396f2568ca73164fa3c7f0000000000000000000000000000000000000000000000000000000015e8af54	16113066	0x284a38428260c9b61914e52e63f3acea6bdb58e17c00e49c9a4ce8a15fe9f4e8
1044	0x4a22b47be68d3de20c310c9eb9cc15031e43c40a8232169125d4820fc06285cf	0x129c24df1bd82bc2ce9f461063af011662926ba5	0xea64e64545f005c2591d49e760eba2560068e970	3000000000000000	0x	16113066	0x284a38428260c9b61914e52e63f3acea6bdb58e17c00e49c9a4ce8a15fe9f4e8
1045	0x8f4fc0157daa6f4a8fe09efb86774dbda37e5e78d97ae5b7546e4098ebac1294	0xaa7251508e3478e16e198aab57a22060bd3796df	0x283af0b28c62c092c9727f1ee09c02ca627eb7f5	4370000000000000	0xf7a1696300000000000000000000000000000000000000000000000000000000000000c0000000000000000000000000aa7251508e3478e16e198aab57a22060bd3796df0000000000000000000000000000000000000000000000000000000001e18558085a6d6f8ba39b93e9e06f6d86c86c6bf1c52c90ab6e6b41e3ec34b0036a8f3d0000000000000000000000004976fb03c32e5b8cfe2b6ccb31c09ba78ebaba41000000000000000000000000aa7251508e3478e16e198aab57a22060bd3796df00000…	16113066	0x284a38428260c9b61914e52e63f3acea6bdb58e17c00e49c9a4ce8a15fe9f4e8
1048	0x7e6f179ea7c1b7a19bb05f573560b7ef6ff53533b34f0fcf9599c8ad5a05fcf3	0x331438345811dd4fcb75f307074efbcc9e4f378a	0xa965d6c7dcb2238b98389cb926cd6a984cf552d9	1.43e+18	0x	16113066	0x284a38428260c9b61914e52e63f3acea6bdb58e17c00e49c9a4ce8a15fe9f4e8
1056	0x9996aedd0b52c3c5a857984854c1cb0b0ca02cc7d5b4d322572b3202a77ea18d	0x3f0eb2c9189aec7354a74c2627bb42fe9476619c	0x34d85c9cdeb23fa97cb08333b511ac86e1c4e258	0	0xa22cb46500000000000000000000000000000000000111abe46ff893f3b2fdf1f759a8a80000000000000000000000000000000000000000000000000000000000000001	16113066	0x284a38428260c9b61914e52e63f3acea6bdb58e17c00e49c9a4ce8a15fe9f4e8
1057	0x2a28ebc07d76bc30d0e34afdbfee3e42d9def2755f40de84196d797cf8cf8c87	0xab97925eb84fe0260779f58b7cb08d77dcb1ee2b	0xd617cfab90fddb27b26553e162e3b9263415a206	8e+16	0x	16113066	0x284a38428260c9b61914e52e63f3acea6bdb58e17c00e49c9a4ce8a15fe9f4e8
1058	0x0f93b117ccaede2baf54c6ddf2a88aaa15fdc923551d0aaf2d10b1de321667a5	0x3cbd125486ec091b57d18560a34ce6750873bdb8	0x7d1afa7b718fb893db30a3abc0cfc608aacfebb0	0	0x095ea7b3000000000000000000000000401f6c983ea34274ec46f84d70b31c151321188bffffffffffffffffffffffffffffffffffffffffffffffffffffffffffffffff	16113066	0x284a38428260c9b61914e52e63f3acea6bdb58e17c00e49c9a4ce8a15fe9f4e8
1059	0xf79ff3ab568eb7b5b1a8021625354aa1ef2c3258d90f9c0b2c2f79e7c08bc2ff	0xdfd5293d8e347dfe59e90efd55b2956a1343963d	0xdac17f958d2ee523a2206206994597c13d831ec7	0	0xa9059cbb0000000000000000000000004b961e4014016f1ef54349aecdff1e6b1364790300000000000000000000000000000000000000000000000000000007754f6ab0	16113066	0x284a38428260c9b61914e52e63f3acea6bdb58e17c00e49c9a4ce8a15fe9f4e8
1060	0xfed3ad95a75ebb6bef5ae8132d7ff0858fc347781ef3c970c1fa6e2ad570cae9	0x1c06c36a559bbe99adece16eb7a63c5e997b2ef3	0xf71530c1f043703085b42608ff9dcccc43210a8e	0	0x89eaa45c0000000000000000000000000000000000000000000000008bce7001419c02950000000000000000000000000000000000000000000000008a3c1f84c1bc42a20307006e00000000000000000708c79025cdd08c020060594a405d53811d3bc4766596efd80fd545a2700000055475920a8c93cffb64d039a8205f7acc7722d30300584ec2562b937c4ac0452184d8d83346382b5d3a	16113066	0x284a38428260c9b61914e52e63f3acea6bdb58e17c00e49c9a4ce8a15fe9f4e8
1062	0x0b50dabb850e2bca34e9be8a6717608b6bc55a08df6f83b7a75b7baaf264cb19	0x6c274c0b4398f01f0e654bf2d0c46e0ce4f4781f	0xeeeec6476073778077b40a73fe32e23a9876cab4	7.94e+16	0x2b66d72e000000000000000000000000000000000000000000000000000000000000002000000000000000000000000000000000000000000000000000000000000000ea65794a68624763694f694a46557a49314e694973496d74705a434936496a64684e6a526c5a6d51314c544a694e4463744e475a6a5a6931684f4463784c5445785a6d59354f5451345954646a4f434a392e436751784d6a553545674e56553051614a444d314f4745324e6d4a694c5468694d5455744e444d315a4331694e6d4d784c5…	16113066	0x284a38428260c9b61914e52e63f3acea6bdb58e17c00e49c9a4ce8a15fe9f4e8
1063	0xebb6e19b1a3b0da83ba8dfb2fb8e03d37e0a22453971988491838c35be3ce76c	0xda00a1d539b48fc9ffb2047b925b7f14437d1881	0xc02aaa39b223fe8d0a0e5c4f27ead9083c756cc2	5.01e+16	0xd0e30db0	16113066	0x284a38428260c9b61914e52e63f3acea6bdb58e17c00e49c9a4ce8a15fe9f4e8
1064	0xbe6d6a6d05037f448ea5d18219b1a0e16e935e3508b44116f78407f91dfcb4c5	0xcbd6832ebc203e49e2b771897067fce3c58575ac	0x49cf3faf077a33bfdbb880dbebe43ada89100ec7	2.45e+17	0x	16113066	0x284a38428260c9b61914e52e63f3acea6bdb58e17c00e49c9a4ce8a15fe9f4e8
1066	0xe1f89ff73a19cdfec00a1bf705cf1913dc1f0d31f15b6c928f8c5f5f82e3495e	0xff10bda1d2626a780123d86b0012e30da2205b7c	0xf2518c1d088a38bce6a5d49db3540fb088da1d36	0	0x2faf3ea600000000000000000000000000000000000000000000000000000000000000010000000000000000000000000000000000000000000000000000000000000000	16113066	0x284a38428260c9b61914e52e63f3acea6bdb58e17c00e49c9a4ce8a15fe9f4e8
1069	0x04081d0de0e856a85ac0cc098b9b4f6b0b2187b5df20a9ce75f7f6bfe1e86025	0x8cde74df83bf46c5d410f0938bc51ba54554b61f	0x2778e114e294ffdb213c7c3772fa3d8680f48aaf	2000000000000000	0x	16113066	0x284a38428260c9b61914e52e63f3acea6bdb58e17c00e49c9a4ce8a15fe9f4e8
1070	0x0f2d052f15738fda6fe58ce4c56a44b7245a4143f7df23e6b1dcf038d7019298	0x46340b20830761efd32832a74d7169b29feb9758	0x99128183b5fa76f026a1dd097c155e6ff9dc0bd0	6.99e+17	0x	16113066	0x284a38428260c9b61914e52e63f3acea6bdb58e17c00e49c9a4ce8a15fe9f4e8
1071	0xb4e2cd501c7fdc3ebf7360641a4405f74a91648ab4ab9a5b9045b1a2477fd989	0x28c6c06298d514db089934071355e5743bf21d60	0x18aaa7115705e8be94bffebde57af9bfc265b998	0	0xa9059cbb000000000000000000000000d724e10612626d9a0c1a1dc5eb7ea52093003b71000000000000000000000000000000000000000000000d08d1f3d54e28c54000	16113066	0x284a38428260c9b61914e52e63f3acea6bdb58e17c00e49c9a4ce8a15fe9f4e8
1073	0xf771bfc52ceca95cd27439bf272b02b7c3350a7c2df5e3a967c635084c7ab62c	0xdfd5293d8e347dfe59e90efd55b2956a1343963d	0x18aaa7115705e8be94bffebde57af9bfc265b998	0	0xa9059cbb0000000000000000000000002f9b443a95c56f7e896f33b84daa652072d669e10000000000000000000000000000000000000000000004fc4b504cc1e3968000	16113066	0x284a38428260c9b61914e52e63f3acea6bdb58e17c00e49c9a4ce8a15fe9f4e8
1075	0xee224433c318e074c5fdbdab74d1a2b73fc1cf671775c4ec22de41eb3b29475c	0xbd526e28eac8d7452115702d2c38442bf423d940	0x4bb38f240d17113bf5261997c604b2f292ec7fb7	7950000000000000	0x	16113066	0x284a38428260c9b61914e52e63f3acea6bdb58e17c00e49c9a4ce8a15fe9f4e8
1077	0x5a003b78506fc6f180ebe11c6b418e2af382d88b37c3bdf9edc39cff3dd7b389	0xa93bf02df42fbba55d372fb056230400b41974d8	0x68b3465833fb72a70ecdf485e0e4c7bd8665fc45	5e+16	0x5ae401dc00000000000000000000000000000000000000000000000000000000638ce37f00000000000000000000000000000000000000000000000000000000000000400000000000000000000000000000000000000000000000000000000000000001000000000000000000000000000000000000000000000000000000000000002000000000000000000000000000000000000000000000000000000000000000e4472b43f300000000000000000000000000000000000000000000000000b1a2bc2ec50…	16113066	0x284a38428260c9b61914e52e63f3acea6bdb58e17c00e49c9a4ce8a15fe9f4e8
1079	0x43a2aafbcb9be4e061dc73a7977c3b64ec13bdba8f134726a896d77974a80df5	0xadff2928e3d8f992fd661014198141aa38444a99	0xdac17f958d2ee523a2206206994597c13d831ec7	0	0xa9059cbb0000000000000000000000008d4548ca4116483d873a230f8fbccdb185a4c9500000000000000000000000000000000000000000000000000000000005f5e100	16113066	0x284a38428260c9b61914e52e63f3acea6bdb58e17c00e49c9a4ce8a15fe9f4e8
1081	0x03a658905e9a6f40710b975e8903be1952c2c69485737f200bbe9160eea33480	0x9824e0baa440a9ccb1726518bfa99ffa60dc033a	0xc944e90c64b2c07662a292be6244bdf05cda44a7	0	0xa9059cbb0000000000000000000000007e3126000b307022594cf437b48211c40e52f905000000000000000000000000000000000000000000000004c53ecdc18a600000	16113066	0x284a38428260c9b61914e52e63f3acea6bdb58e17c00e49c9a4ce8a15fe9f4e8
1084	0x98f36410fdfd9a7ac8627a862ad8d7fbfd40528f1e9c8c06b33689b79b4914dd	0xbbe2374679b45a6ffd3cbd9bbca9719c34708ef4	0x2b591e99afe9f32eaa6214f7b7629768c40eeb39	0	0x52a438b80000000000000000000000000000000000000000000000000000000ba43b740000000000000000000000000000000000000000000000000000000000000013f6	16113066	0x284a38428260c9b61914e52e63f3acea6bdb58e17c00e49c9a4ce8a15fe9f4e8
1086	0x9ce32440a25c4ac448eee87909e0dbfa0588e561231e82c7f6ad8e3fc332976a	0x7affd20b34d9172ab0b15797ec063222ad3e24f9	0xeeeec6476073778077b40a73fe32e23a9876cab4	7.94e+16	0x2b66d72e000000000000000000000000000000000000000000000000000000000000002000000000000000000000000000000000000000000000000000000000000000ea65794a68624763694f694a46557a49314e694973496d74705a434936496a64684e6a526c5a6d51314c544a694e4463744e475a6a5a6931684f4463784c5445785a6d59354f5451345954646a4f434a392e436751784d6a553545674e56553051614a446c6c4d6d49335a44417a4c54426a4e4459744e4459345a4331694f575a6a4c5…	16113066	0x284a38428260c9b61914e52e63f3acea6bdb58e17c00e49c9a4ce8a15fe9f4e8
1087	0x657ab5b3d6a3035ba4d832662bcb13f32bf49ec5b6ab7f854452cda0e1ee3849	0x0401f41d93a0b5152a7c8319bdce9426d229b9e4	0x76f4eed9fe41262669d0250b2a97db79712ad855	0	0xf17a454600000000000000000000000000000000000000000000000000000000000000c000000000000000000000000000000000000000000000000000000000000001a000000000000000000000000000000000000000000000000000000004cb3f34bf00000000000000000000000000000000000000000000000000000004ca0507e50000000000000000000000001d64fb0ffa8362b2e1ee7ee03929159551eab26e000000000000000000000000000000000000000000000000000000000000022000000…	16113066	0x284a38428260c9b61914e52e63f3acea6bdb58e17c00e49c9a4ce8a15fe9f4e8
1088	0x964c1348f06284c86b5dd855643d3044382c0debba74ab379807bfdbc04bfec9	0x9431d00f6f9c9c6c78eb7453a97e27c3ff4fb1eb	0x3b42caca955f1a511324fc453ebe48c3f48dfb9b	4.36e+18	0x	16113066	0x284a38428260c9b61914e52e63f3acea6bdb58e17c00e49c9a4ce8a15fe9f4e8
1089	0x21a9de9039a018502bf10f6909ab9dc205ef6d3146bc49e873ca97e1e1c64ef2	0x996fddd1b9d335934caff2fd725445f92ea87da3	0x8e8f404616c22d2a11ce61b9837e0cb53241fbcb	1000000000000000	0xa0712d680000000000000000000000000000000000000000000000000000000000000001	16113066	0x284a38428260c9b61914e52e63f3acea6bdb58e17c00e49c9a4ce8a15fe9f4e8
1090	0x10d01edf1ddadf541d6e9ab4b8bb7b99d75fc75a9fc50c3b304245b58912eec7	0xcbd6832ebc203e49e2b771897067fce3c58575ac	0x4639972de61e9f677e7497a9ed43126416d97054	1.38e+17	0x	16113066	0x284a38428260c9b61914e52e63f3acea6bdb58e17c00e49c9a4ce8a15fe9f4e8
1091	0x09ebde632f98ce4dd475047cf7cb4bc89bb80aab207795847b95449d833357ae	0x6dfc34609a05bc22319fa4cce1d1e2929548c0d7	0x9856c017b62df5d151eeda0ce3ce00000f915604	3.02e+17	0x	16113066	0x284a38428260c9b61914e52e63f3acea6bdb58e17c00e49c9a4ce8a15fe9f4e8
1092	0x6fad3fec1c4899502221203caa6e79f89e8d67286c0394e2a7e10ae8262a465d	0x49cdeeb07130ff3940bef27d43c758323cac4ec2	0x4521c9ad6a3d4230803ab752ed238be11f8b342f	0	0xa9059cbb00000000000000000000000021e97d0b9004243ab188ba5107cd65412617de1c000000000000000000000000000000000000000000026ff5ff09cc16aaf7a000	16113066	0x284a38428260c9b61914e52e63f3acea6bdb58e17c00e49c9a4ce8a15fe9f4e8
1093	0x858828655a268ad022f8800d7e8005ff8decf9856ce070bba569f439ff76d10e	0x21a31ee1afc51d94c2efccaa2092ad1028285549	0x18aaa7115705e8be94bffebde57af9bfc265b998	0	0xa9059cbb000000000000000000000000b3eb9b55888b642a76545ff6896a488cc6559d5f0000000000000000000000000000000000000000000004e6cbee87746a15c000	16113066	0x284a38428260c9b61914e52e63f3acea6bdb58e17c00e49c9a4ce8a15fe9f4e8
1094	0x1471bfead8cc445129f0abce484c0adc94b8c681f377edc917acc8c0691954c3	0xfed3d7216792066a442bbe2b3e1166f15bdd334a	0x68b3465833fb72a70ecdf485e0e4c7bd8665fc45	0	0x5ae401dc00000000000000000000000000000000000000000000000000000000638ce5d7000000000000000000000000000000000000000000000000000000000000004000000000000000000000000000000000000000000000000000000000000000020000000000000000000000000000000000000000000000000000000000000040000000000000000000000000000000000000000000000000000000000000016000000000000000000000000000000000000000000000000000000000000000e4472b4…	16113066	0x284a38428260c9b61914e52e63f3acea6bdb58e17c00e49c9a4ce8a15fe9f4e8
1095	0xc7348785330c45c73b829aa56f38c3251c6db4c06e9aa887851c15aa53fe3381	0x46340b20830761efd32832a74d7169b29feb9758	0xabc273560968eb1798270ec1a6a6964ebea4ff02	8.54e+16	0x	16113066	0x284a38428260c9b61914e52e63f3acea6bdb58e17c00e49c9a4ce8a15fe9f4e8
1098	0x9a59c859195eae36af440da01eb5df4b63a896ee058b6988ba648f20c6d1d710	0x1be210e7990eff6c07cb8cadcb9d077063ac3614	0x3da10915ad2a3b3b7ec6d2d18c33f354447b60f9	2100000000000000	0x	16113066	0x284a38428260c9b61914e52e63f3acea6bdb58e17c00e49c9a4ce8a15fe9f4e8
1099	0x0736bdf03a69fd78cf3792a8cb22755dccd28fe356b1d30193651f1d5d106a21	0x9fb438f1a292fbdaf4f569a8f2e2e2972c0172ec	0xd9e1ce17f2641f24ae83637ab66a2cca9c378b9f	100000000000000	0x7ff36ab5000000000000000000000000000000000000000000000000014ae8174e4a6dd700000000000000000000000000000000000000000000000000000000000000800000000000000000000000009fb438f1a292fbdaf4f569a8f2e2e2972c0172ec00000000000000000000000000000000000000000000000000000000638ce5530000000000000000000000000000000000000000000000000000000000000002000000000000000000000000c02aaa39b223fe8d0a0e5c4f27ead9083c756cc200000…	16113066	0x284a38428260c9b61914e52e63f3acea6bdb58e17c00e49c9a4ce8a15fe9f4e8
1101	0xc488bb99a51680d96cb007cb4f572f949a41e6b8acb32006dc60fcf1dc6f2a5b	0xab97925eb84fe0260779f58b7cb08d77dcb1ee2b	0x077919f344e0c6923623c76743b021a3ddbc1958	8e+16	0x	16113066	0x284a38428260c9b61914e52e63f3acea6bdb58e17c00e49c9a4ce8a15fe9f4e8
1102	0xe24fee54b4117f22df055f8eef2ad8755c92ab4c8bba620dcad071658e117744	0x916323199e8cc3297b997b927c47467375b50a58	0x3845badade8e6dff049820680d1f14bd3903a5d0	0	0x095ea7b300000000000000000000000068b3465833fb72a70ecdf485e0e4c7bd8665fc45ffffffffffffffffffffffffffffffffffffffffffffffffffffffffffffffff	16113066	0x284a38428260c9b61914e52e63f3acea6bdb58e17c00e49c9a4ce8a15fe9f4e8
1103	0x8894fec0d290566a9c8c4876eb1c93998fd65b61cae76f9d9cee514d9cd9e9d5	0x56eddb7aa87536c09ccc2793473599fd21a8b17f	0xdac17f958d2ee523a2206206994597c13d831ec7	0	0xa9059cbb0000000000000000000000009f37390d652d2a55343128cb606282cf99a9c7420000000000000000000000000000000000000000000000000000000032118910	16113066	0x284a38428260c9b61914e52e63f3acea6bdb58e17c00e49c9a4ce8a15fe9f4e8
1104	0x6e1eda9c9428d93b9795f77a0ff592a8affe7dabe87949c9ffcbe0e5bca12361	0xc643c9411a6b489e9833b16631140f42bbfcb6d1	0xeeeec6476073778077b40a73fe32e23a9876cab4	7.94e+16	0x2b66d72e000000000000000000000000000000000000000000000000000000000000002000000000000000000000000000000000000000000000000000000000000000ea65794a68624763694f694a46557a49314e694973496d74705a434936496a64684e6a526c5a6d51314c544a694e4463744e475a6a5a6931684f4463784c5445785a6d59354f5451345954646a4f434a392e436751784d6a553545674e56553051614a47466d59544d344e6d4a6a4c545a6d4e324d744e4749355a4331684f4445314c5…	16113066	0x284a38428260c9b61914e52e63f3acea6bdb58e17c00e49c9a4ce8a15fe9f4e8
1105	0x44cfa234cbe4ef902866e3c21259e03edf267dfbbdafb49c05432e4e14140d6c	0xb13f10d10cdbb644313b229ad113c9bf279b1f16	0x68b3465833fb72a70ecdf485e0e4c7bd8665fc45	5.89e+16	0x5ae401dc00000000000000000000000000000000000000000000000000000000638ce5d700000000000000000000000000000000000000000000000000000000000000400000000000000000000000000000000000000000000000000000000000000001000000000000000000000000000000000000000000000000000000000000002000000000000000000000000000000000000000000000000000000000000000e4472b43f300000000000000000000000000000000000000000000000000d126f763867…	16113066	0x284a38428260c9b61914e52e63f3acea6bdb58e17c00e49c9a4ce8a15fe9f4e8
1108	0xb20879c62ef91fce829b951e41ebcb3fd6e11362c4900267cbce14c4e5419c7b	0x7cab69934e9b42f7516cbda67d9e85bb802e0086	0x76f4eed9fe41262669d0250b2a97db79712ad855	0	0xf17a454600000000000000000000000000000000000000000000000000000000000000c000000000000000000000000000000000000000000000000000000000000001a0000000000000000000000000000000000000000000000b480c8297346b7c7680000000000000000000000000000000000000000000000b45292b6b88976923700000000000000000000000001d64fb0ffa8362b2e1ee7ee03929159551eab26e000000000000000000000000000000000000000000000000000000000000022000000…	16113066	0x284a38428260c9b61914e52e63f3acea6bdb58e17c00e49c9a4ce8a15fe9f4e8
1109	0x77936534a38be1ab3f4e80140d5d455c35de26d5e56e644ab7865af5c5b2fb9e	0x016389f4d75d98dd534eca7b6178acd462f05c96	0xf9459156401e8b81fbf5d34dada2b4f7f63d141e	0	0x3c9c20870000000000000000000000000000000000000000000000000000000000000020000000000000000000000000000000000000000000000000000000000000004b4b6b175474e89094c44da98b954eedeac495271d0f010000001fe567ffee34b279951b23595bea1304654b58763b19ebf2aa65c3b102ba05bbb39ff32ca86f084bc482ff9b36c93bd8a203000000000000000000000000000000000000000000	16113066	0x284a38428260c9b61914e52e63f3acea6bdb58e17c00e49c9a4ce8a15fe9f4e8
1111	0xab5af2e161c879e6807ee1de1fe6c59c29d56b96e472b6309e04b3af5768c688	0x6dfc34609a05bc22319fa4cce1d1e2929548c0d7	0xdac17f958d2ee523a2206206994597c13d831ec7	0	0x23b872dd00000000000000000000000089a61c8fd6c8a75b4ab1b9f58117db85f9df58bd0000000000000000000000006dfc34609a05bc22319fa4cce1d1e2929548c0d700000000000000000000000000000000000000000000000000000000013124cc	16113065	0xaf39eac2db5fcdc6ad207a781eda6aa99e9fa9c3a7692d46963ca8e31e10ee0f
1112	0xf1b91c53515e5401f14fe4c208c4b9675e25261cd792b384cb296c9936fe4300	0xf7858da8a6617f7c6d0ff2bcafdb6d2eedf64840	0x8fa845f37312321a2a83f638677ba98a217bccd7	2.6e+16	0x	16113065	0xaf39eac2db5fcdc6ad207a781eda6aa99e9fa9c3a7692d46963ca8e31e10ee0f
1113	0x17553fb36ede538dc69a773ff52a6f8a91a73a06532459d100f4495ae6687dbd	0xcdbadbc6f8b1a90565589c53324093cf504b9d35	0x68b3465833fb72a70ecdf485e0e4c7bd8665fc45	2e+16	0x5ae401dc00000000000000000000000000000000000000000000000000000000638ce5bf00000000000000000000000000000000000000000000000000000000000000400000000000000000000000000000000000000000000000000000000000000001000000000000000000000000000000000000000000000000000000000000002000000000000000000000000000000000000000000000000000000000000000e4472b43f300000000000000000000000000000000000000000000000000470de4df820…	16113065	0xaf39eac2db5fcdc6ad207a781eda6aa99e9fa9c3a7692d46963ca8e31e10ee0f
1114	0x248068d2345383ae2ae45c1a0e3eeae88832373a680a4bf7036715c653caf5a2	0xaf9345dd9b775bc494c47d69538430af68025151	0x3df05cc01042ea01920551d7861ab572461043ec	6800000000000000	0x00	16113065	0xaf39eac2db5fcdc6ad207a781eda6aa99e9fa9c3a7692d46963ca8e31e10ee0f
1115	0x242b50c4e724f84745879ebc774219f7c8de20dcb2d5d0280d34198e5593fdb5	0x1be210e7990eff6c07cb8cadcb9d077063ac3614	0x7c22f49a8561e3c513867e81f0cbafae13b47d00	2100000000000000	0x	16113065	0xaf39eac2db5fcdc6ad207a781eda6aa99e9fa9c3a7692d46963ca8e31e10ee0f
1116	0xae6d454de95b996512b4ee35de17dedbc16011bb8012d732e73a2d2c708b690d	0x1be210e7990eff6c07cb8cadcb9d077063ac3614	0x9b183a7273eb13ef22fe3174132b1831147cc824	2100000000000000	0x	16113065	0xaf39eac2db5fcdc6ad207a781eda6aa99e9fa9c3a7692d46963ca8e31e10ee0f
1120	0xef1c8ed776047a4a88ff9655c8ed1a18b70928ef8c097d3a359a292e8b7f4f03	0x07a6287facbeae3ab55cad0ada9bb46700131d4b	0x9ade9ea6fd4fca08e27db8d2b607e3e30bcb0ab2	0	0x1b9115470000000000000000000000000000000000000000000000000000000000001d43	16113065	0xaf39eac2db5fcdc6ad207a781eda6aa99e9fa9c3a7692d46963ca8e31e10ee0f
1121	0x8ad73d2b1085891be6ab8fc5f712f971040681ef22f6e51a93f5940d085b29c7	0xab97925eb84fe0260779f58b7cb08d77dcb1ee2b	0x7fe9e9443ce941c0c916cf6d234260ba5f0d6490	8e+16	0x	16113065	0xaf39eac2db5fcdc6ad207a781eda6aa99e9fa9c3a7692d46963ca8e31e10ee0f
1122	0xccd908412d3f8c0c08e0786baebc7013de5bd7682c8a9b7ba3e9c045f052a315	0x7022cda7bccd7659f208097cbe79b1da313f159d	0x0de8bf93da2f7eecb3d9169422413a9bef4ef628	0	0xb1ae2ed100000000000000000000000000000000000000000000000000000000000000800000000000000000000000000000000000000000000000000000000000000060000000000000000000000000000000000000000000000000000000000000014000000000000000000000000000000000000000000000000000000000000000a459635f6f00000000000000000000000006450dee7fd2fb8e39061434babcfc05599a6fb80000000000000000000000000000000000000000000000000000000000000…	16113065	0xaf39eac2db5fcdc6ad207a781eda6aa99e9fa9c3a7692d46963ca8e31e10ee0f
1124	0x692c1e2a701a5b2f8c1a4f9585cbedbb5071ac5b7c1b819d47cb15e8435fd1ab	0x7e212f6045dd847732ae1aed4eb9ef6d1a3746c5	0xf63b34710400cad3e044cffdcab00a0f32e33ecf	0	0xc04a8a10000000000000000000000000effc18fc3b7eb8e676dac549e0c693ad50d1ce31ffffffffffffffffffffffffffffffffffffffffffffffffffffffffffffffff	16113065	0xaf39eac2db5fcdc6ad207a781eda6aa99e9fa9c3a7692d46963ca8e31e10ee0f
1125	0xf9b34f6a8557e77585d40240147e21ca7cc1e8aa7f2dd3c1aeb780a564443d1a	0x0a690b298f84d12414f5c8db7de1ece5a4605877	0xd9e1ce17f2641f24ae83637ab66a2cca9c378b9f	0	0x38ed1739000000000000000000000000000000000000000000000000000000e8d4a510000000000000000000000000000000000000000000000001c6b147def9faa4cf4c00000000000000000000000000000000000000000000000000000000000000a00000000000000000000000000a690b298f84d12414f5c8db7de1ece5a460587700000000000000000000000000000000000000000000000000000000638ce5d7000000000000000000000000000000000000000000000000000000000000000200000…	16113065	0xaf39eac2db5fcdc6ad207a781eda6aa99e9fa9c3a7692d46963ca8e31e10ee0f
1127	0x130995ca17c7fa67b9aea0384381f3776abb1f514e6515aa7df2a5fc2b542fed	0x76903beb27ebfe84657d654cf0cbb70091a28ce0	0xd9f6724f250f4da8453e3dd97d718872bf72c1da	0	0x095ea7b300000000000000000000000068b3465833fb72a70ecdf485e0e4c7bd8665fc45ffffffffffffffffffffffffffffffffffffffffffffffffffffffffffffffff	16113065	0xaf39eac2db5fcdc6ad207a781eda6aa99e9fa9c3a7692d46963ca8e31e10ee0f
1129	0x6417e3f4c7ac673b702e0834e0f3294e4c59aff8ac26177b430e3478eabcd2c0	0x936615c67d05f1afa21382d1174fb1a7d9bf35d3	0x80c67432656d59144ceff962e8faf8926599bcf8	3.01e+17	0x	16113065	0xaf39eac2db5fcdc6ad207a781eda6aa99e9fa9c3a7692d46963ca8e31e10ee0f
1130	0x0c249b136f6541e521388ba633ccab52e32c2edf4e36f4a0b41409939a96ea45	0x21a31ee1afc51d94c2efccaa2092ad1028285549	0x18aaa7115705e8be94bffebde57af9bfc265b998	0	0xa9059cbb00000000000000000000000015757ca587b5cb4cf560eb46ad5cca2a3ff325ed000000000000000000000000000000000000000000002a77f219b5f6dca00000	16113065	0xaf39eac2db5fcdc6ad207a781eda6aa99e9fa9c3a7692d46963ca8e31e10ee0f
1131	0x5b5c1665327e27e4c7280172b381913c11aa981311804b655d6d8b579d6ca2ae	0x8d921e4e3ce08e06ff28f74939c7f0c5c395ff6c	0xf4565dcb2b18ac03714743608f8b7d834e520f1d	0	0x095ea7b30000000000000000000000007a250d5630b4cf539739df2c5dacb4c659f2488dffffffffffffffffffffffffffffffffffffffffffffffffffffffffffffffff	16113065	0xaf39eac2db5fcdc6ad207a781eda6aa99e9fa9c3a7692d46963ca8e31e10ee0f
1132	0x8acd66fe25ea7bf5afaf1878403d4ae0289065ecee3892db7736556aba54980f	0xba765a18d026c1080c153481224fb785d5773b46	0x715ca6861adb9834f8848312239c755a5d05cf9a	6e+17	0x	16113065	0xaf39eac2db5fcdc6ad207a781eda6aa99e9fa9c3a7692d46963ca8e31e10ee0f
1134	0x41581b578f59cb60465bd20a436ba55158182a2d3303e72fb59394318bc99fa9	0x4976a4a02f38326660d17bf34b431dc6e2eb2327	0x3408436db9e65b09d164e2d5f38375e86232b8c2	4.17e+17	0x	16113065	0xaf39eac2db5fcdc6ad207a781eda6aa99e9fa9c3a7692d46963ca8e31e10ee0f
1137	0x0cc2bcf334c3d0d59ed56309d4d0e9c0c492a0df46cd377ffa975582d05c38b0	0x8c54ebdd960056d2cff5998df5695daca1fc0190	0x18aaa7115705e8be94bffebde57af9bfc265b998	0	0xa9059cbb000000000000000000000000a0ffb6881803f70f089ec4d7ead6355c3f92e06600000000000000000000000000000000000000000000022a6e9562452a918000	16113065	0xaf39eac2db5fcdc6ad207a781eda6aa99e9fa9c3a7692d46963ca8e31e10ee0f
1138	0x37e88b9e5ce45264f901d75e2e195831cec955aa2bb77d2768fff8a2898787da	0x9f64e6a575f50d7c8c5aea4be962f86ee2c5ca31	0x0711a9767a41290d7f52714204618345c584f450	0	0xda7e7c50000000000000000000000000000000000000000000000000000000000000000000000000000000000000000000000000000000000000000000000000000000400000000000000000000000000000000000000000000000000000000000000010c0018061b90c19a6dd01f14641a94e42743f2bad75ce23427139f90824fc22c49e346bff37e02f989475d006413fdda725d34796db022bf2d92468766df78bddbfc39eeb4addb1d1c3c625086416d862c44e06f24e80a840639e7d43d118509e01720…	16113065	0xaf39eac2db5fcdc6ad207a781eda6aa99e9fa9c3a7692d46963ca8e31e10ee0f
1140	0xff36398f2e66e1487a31a18185cfc5247c3d8b2a53c5a37dc138bc3fec44f948	0x341246cdb00f802033dda123839548c9b6c11bca	0xa7d7ecd29d6324baff6c21cde6d0e047664366be	4.7e+17	0x	16113065	0xaf39eac2db5fcdc6ad207a781eda6aa99e9fa9c3a7692d46963ca8e31e10ee0f
1141	0xf1bc80ef54a8bab0e0e227f5761c41adbdfddbe37c56bd150cef9095a27efb03	0x962489dd272a66c0d7357dfa3bc58dd701941196	0x731bd9fcef97de18d116c308f5794ed1a78ee931	3.96e+17	0x	16113065	0xaf39eac2db5fcdc6ad207a781eda6aa99e9fa9c3a7692d46963ca8e31e10ee0f
1142	0xd7264c34b05e11d0b0d7fe1865e3214577fec1fbfa226e9a43d68e0b5f959360	0x750ecc39214780d1f78407a123570e71a697de83	0xf95d3b9a15edec2620d6791b69d777d8678c03f1	0	0xa22cb4650000000000000000000000001e0049783f008a0085193e00003d00cd54003c710000000000000000000000000000000000000000000000000000000000000001	16113065	0xaf39eac2db5fcdc6ad207a781eda6aa99e9fa9c3a7692d46963ca8e31e10ee0f
1143	0x195b4d39808047326f699ae30830f79fbc6f8b007f1f671b73e43f719c5ea77b	0x56eddb7aa87536c09ccc2793473599fd21a8b17f	0x188a6b1e55f5b114f506e82cce49cdb9d965727c	1.12e+16	0x	16113065	0xaf39eac2db5fcdc6ad207a781eda6aa99e9fa9c3a7692d46963ca8e31e10ee0f
1144	0x8095f720e7ae38e3cde2864e63f2d538a57c78664b14487a49546c363ac3a1cb	0x21a31ee1afc51d94c2efccaa2092ad1028285549	0x975f1f8d3e8733fb8f2f4160fad692fb0648274a	4.68e+16	0x	16113065	0xaf39eac2db5fcdc6ad207a781eda6aa99e9fa9c3a7692d46963ca8e31e10ee0f
1145	0x577f9977d2109d4f146ed811ad13910f857a3a843ee183d7884380b531d16dd4	0x69f3322b0efb6ae4e32b5a70bff7220787c7bc1c	0xc20b8d5d265e97b1d8034e3d2694dd68a825ef0e	1.96e+17	0x	16113065	0xaf39eac2db5fcdc6ad207a781eda6aa99e9fa9c3a7692d46963ca8e31e10ee0f
1147	0x433e4d4930501c2d3e20e592d7a594a28e749cfade514d8957b68617ba701d28	0x28c6c06298d514db089934071355e5743bf21d60	0x6b175474e89094c44da98b954eedeac495271d0f	0	0xa9059cbb000000000000000000000000e77a378414fabe0e588e6edd5e00a0f8bc2ac5eb000000000000000000000000000000000000000000000003a159e04269375c00	16113065	0xaf39eac2db5fcdc6ad207a781eda6aa99e9fa9c3a7692d46963ca8e31e10ee0f
1148	0x58f691287180b66b256c7f7dd201f79f37bc9dba2e46de1ed754a21fb238a916	0x6060e0dcea7522641ba8ca8080dbbbbf0b82eadd	0x7644ed2555b78c24250a92646e57931fa7660c8b	3.22e+16	0x	16113065	0xaf39eac2db5fcdc6ad207a781eda6aa99e9fa9c3a7692d46963ca8e31e10ee0f
1149	0x2c8a84d55b0a8061d95e601666f385a334d5e2bf1045d80bb3dc98679a798e4d	0x7545c7e189c156713284f9e0a3fe7fed2d464171	0x2e7a90ddaff3981e844aba72aff6178eae4b54b6	5.5e+16	0x	16113065	0xaf39eac2db5fcdc6ad207a781eda6aa99e9fa9c3a7692d46963ca8e31e10ee0f
1150	0x01ee36f87da8aad9d566ade6d731315e1ecb9ca63004857f76e2a79d61711528	0x78c56c45485ac5b2593513eb3d1b9f46b7e18a59	0x6e627f5b398bd40cfcb1b91fd2b11e0b54790865	1990000000000000	0x	16113065	0xaf39eac2db5fcdc6ad207a781eda6aa99e9fa9c3a7692d46963ca8e31e10ee0f
1151	0xe7325f342ab47bc09c5ef69de74a04a689d0c19050446b0a08b5c9e283d034d3	0xdfd5293d8e347dfe59e90efd55b2956a1343963d	0x4a220e6096b25eadb88358cb44068a3248254675	0	0xa9059cbb000000000000000000000000fba3ea29cf3035e0effc18a7a610f591bbfbea430000000000000000000000000000000000000000000000002212fa575d044000	16113065	0xaf39eac2db5fcdc6ad207a781eda6aa99e9fa9c3a7692d46963ca8e31e10ee0f
1154	0xc0afc48ff9f2c586deda65223fe99a5347e30918f3146d55883862db974e6762	0xdfd5293d8e347dfe59e90efd55b2956a1343963d	0x1f573d6fb3f13d689ff844b4ce37794d79a7ff1c	0	0xa9059cbb000000000000000000000000ac38f405c63c6829fc985d5910274f891327d34a00000000000000000000000000000000000000000000002fcbe658dbdbc5c000	16113065	0xaf39eac2db5fcdc6ad207a781eda6aa99e9fa9c3a7692d46963ca8e31e10ee0f
1156	0x230c3878efd9dcf260a6d49b802fada67a2cf9e4b4f819ebac01da53382493a1	0x16565d6e9d0736dbedd5bf4d1febcb5b478c0038	0xdd9b343cd90a9536b69a1484876d7e2f4cb69cf7	300000000000000	0x	16113065	0xaf39eac2db5fcdc6ad207a781eda6aa99e9fa9c3a7692d46963ca8e31e10ee0f
1157	0x902c60d05de7b14ae0da5cd655de5ed92e8ae52fbeb958b509e1bf196e9d93d1	0x9696f59e4d72e237be84ffd425dcad154bf96976	0x1b713575efd711c177bc15ce0550b350e0867229	9.65e+16	0x	16113065	0xaf39eac2db5fcdc6ad207a781eda6aa99e9fa9c3a7692d46963ca8e31e10ee0f
1158	0x55e0675071b2b6331be5994bb851918ba6f74a6b2fb278578b1093e6030db1ea	0x3e5d8b8998c4f060606726b356f4310d65e559e5	0xc30141b657f4216252dc59af2e7cdb9d8792e1b0	1700000000000000	0xa44bbb1500000000000000000000000000000000000000000000000000000000000000200000000000000000000000003e5d8b8998c4f060606726b356f4310d65e559e5000000000000000000000000000000000000000000000000000000000000000a00000000000000000000000000000000000000000000000000060a24181e400000000000000000000000000000000000000000000000000000000000000000a0000000000000000000000000000000000000000000000000000000000000016000000…	16113065	0xaf39eac2db5fcdc6ad207a781eda6aa99e9fa9c3a7692d46963ca8e31e10ee0f
1160	0x06cc5f6a643022a85be65263d807146213881fbd647a8ada36df693339f25c08	0x0acdd0fefb605957dfcba4816d77c43dec3f1f79	0xb8c83bd939e7b186da73513fed4da938507ddebf	3000000000000000	0x	16113065	0xaf39eac2db5fcdc6ad207a781eda6aa99e9fa9c3a7692d46963ca8e31e10ee0f
1161	0x7dfb408dcebf952910c0c2a83971a6241487ba4e1288108836597f8f90c98dec	0x1be210e7990eff6c07cb8cadcb9d077063ac3614	0x24d5bc82ee2288c6a568dcb3487132db79bbdbf3	2100000000000000	0x	16113065	0xaf39eac2db5fcdc6ad207a781eda6aa99e9fa9c3a7692d46963ca8e31e10ee0f
1163	0xe1bbdad5eb5fd5203b0a0cd597bcefb9f5676c604c089320630034c2dfb243ff	0x1bc5fea3b62f6cfb84259d629059a5b1111aa6af	0x98c5b40c18ab19c53324e006fa279fc8904137bd	0	0xa22cb4650000000000000000000000001e0049783f008a0085193e00003d00cd54003c710000000000000000000000000000000000000000000000000000000000000001	16113065	0xaf39eac2db5fcdc6ad207a781eda6aa99e9fa9c3a7692d46963ca8e31e10ee0f
1164	0x7bc7fd27aef5b302aa429c8104dbfd655cf8af71a5bff56813ea98ded09b0faf	0xdfd5293d8e347dfe59e90efd55b2956a1343963d	0xdac17f958d2ee523a2206206994597c13d831ec7	0	0xa9059cbb000000000000000000000000237f91aa7857db25179c5f979880bbb1117124b8000000000000000000000000000000000000000000000000000000000ee6b280	16113065	0xaf39eac2db5fcdc6ad207a781eda6aa99e9fa9c3a7692d46963ca8e31e10ee0f
1166	0x0a913498ab122e19033b5f5fb8c748f52e619cf55c1b1c48642a1985bde53415	0x23f4569002a5a07f0ecf688142eeb6bcd883eef8	0x4ca4617dfedb5cc93da2867c775847943633f1fa	4180000000000000	0x	16113065	0xaf39eac2db5fcdc6ad207a781eda6aa99e9fa9c3a7692d46963ca8e31e10ee0f
1167	0x81d253dec30903a5e325a9326a04746db83565424a962520e8bc93f82243c6d2	0x78d8cb274034216654a4fb3dc30c2fd3510115cc	0xc5a9bc46a7dbe1c6de493e84a18f02e70e2c5a32	0	0x095ea7b300000000000000000000000068b3465833fb72a70ecdf485e0e4c7bd8665fc45ffffffffffffffffffffffffffffffffffffffffffffffffffffffffffffffff	16113065	0xaf39eac2db5fcdc6ad207a781eda6aa99e9fa9c3a7692d46963ca8e31e10ee0f
1169	0x43a589694933f536284aa25217ae09804b07426607f5fd711eee5fbbfbc386fd	0x912fd21d7a69678227fe6d08c64222db41477ba0	0xe4e58fe4a2f323eaf816b494fe396b949d368551	1300000000000000	0x	16113065	0xaf39eac2db5fcdc6ad207a781eda6aa99e9fa9c3a7692d46963ca8e31e10ee0f
1170	0x820abf99a4d4e59e9854a6ec99d6d3cc1f0214483ad31332830338db0ed2ab25	0xa220f78711d28963f97fe97fba7406ab90779600	0x7492e30d60d96c58ed0f0dc2fe536098c620c4c0	0	0xefef39a10000000000000000000000000000000000000000000000000000000000000001	16113065	0xaf39eac2db5fcdc6ad207a781eda6aa99e9fa9c3a7692d46963ca8e31e10ee0f
1174	0xa47e66620b71dfa0421fc4395f8e7e3c9d6d75228a123cdee14f6d7ca3d07b36	0x56eddb7aa87536c09ccc2793473599fd21a8b17f	0x6533028644665894ec39088f6785c9dd870a53f6	1.15e+16	0x	16113065	0xaf39eac2db5fcdc6ad207a781eda6aa99e9fa9c3a7692d46963ca8e31e10ee0f
1175	0xd2cc39daf6b51233ac9ef0a95aaef4a71d06aca0abf07a54c187bf7822ee4b6f	0x1be210e7990eff6c07cb8cadcb9d077063ac3614	0x60da65e5002df88b19b83f332260cb6bbe6ea95b	2100000000000000	0x	16113065	0xaf39eac2db5fcdc6ad207a781eda6aa99e9fa9c3a7692d46963ca8e31e10ee0f
1176	0xc1920d74ef2eda24e383ac55e2d87baf8264519805fdd2c3b0f7064cf49f4ef2	0x8c54ebdd960056d2cff5998df5695daca1fc0190	0x18aaa7115705e8be94bffebde57af9bfc265b998	0	0xa9059cbb00000000000000000000000099944f6425dba15821d896ece606ac93b39e0e6e0000000000000000000000000000000000000000000006a43c44fd8641bb8000	16113065	0xaf39eac2db5fcdc6ad207a781eda6aa99e9fa9c3a7692d46963ca8e31e10ee0f
1179	0xbbd9ededee414fee87bbe91310c5fa2a54870209b69d277cc6f31a8b75ad2585	0xf5491f793d47a6ea22f5e0b9ad3990cf66c4b40b	0xdac17f958d2ee523a2206206994597c13d831ec7	0	0xa9059cbb0000000000000000000000007d7b453a8bd52eb35008a358656201c2144234b90000000000000000000000000000000000000000000000000000000002625a00	16113065	0xaf39eac2db5fcdc6ad207a781eda6aa99e9fa9c3a7692d46963ca8e31e10ee0f
1180	0x8818a42b0460084e4f80df81493d1f6b08831c00c44cdcb188fe587541b0d01c	0x0ab4b2f1a5cf3d72206cc1415b8e88ef9c698423	0x5fdcca53617f4d2b9134b29090c87d01058e27e9	0	0x441a3e7000077fa84d24e06bb4915f8d772484719e10dc7d9002ca784495fad2db009806003252dec1ad51e115659dcfab7cbf9489e2ab1d7a81b747ec1a9e5daa0261dd	16113065	0xaf39eac2db5fcdc6ad207a781eda6aa99e9fa9c3a7692d46963ca8e31e10ee0f
1181	0xbb50ef4000151031c4cd7ca5bca4be95f4858d3ddf2ab0f744b608182726b271	0x75ce4df17665543f594746e20bb956f12b0a373e	0xe2efbb43fe5df9249987d6700b3a323398170b41	0	0x1dbf3bc70000000000000000000000000000000000000000000000000000000000003a98	16113065	0xaf39eac2db5fcdc6ad207a781eda6aa99e9fa9c3a7692d46963ca8e31e10ee0f
1183	0x9b336f414829f2d51c43cdd1e7fc52d41650df7d528b7ad46eecf9f2c3d89d39	0xdfd5293d8e347dfe59e90efd55b2956a1343963d	0xd4b99bb9be68452da86a662ed876034b06bda191	3.37e+16	0x	16113065	0xaf39eac2db5fcdc6ad207a781eda6aa99e9fa9c3a7692d46963ca8e31e10ee0f
1186	0xf5345dc2b149d8769d7d3e83a22597e7be786733c9fd2ea7ba3b5d8467c2413b	0x72c8decb7ff0c59570186c692313e6e0f738013f	0x410ded847aa95d55b43c248c23e22810ba903450	4.8e+16	0x	16113065	0xaf39eac2db5fcdc6ad207a781eda6aa99e9fa9c3a7692d46963ca8e31e10ee0f
1188	0xf0a016b891885b3bfeaad246247eff20a9df55992b74085d0dac9161803c9170	0xf2f5c73fa04406b1995e397b55c24ab1f3ea726c	0x388c818ca8b9251b393131c08a736a67ccb19297	4.94e+17	0x	16113065	0xaf39eac2db5fcdc6ad207a781eda6aa99e9fa9c3a7692d46963ca8e31e10ee0f
1189	0x907856fc9a6ec058f208ae82f8b1d056f8eb3ef968ddb1c1fa728867846eb71a	0xb8fb111f2fdb6d500830f4937892b928bba0eccb	0xedb4e61face0ea4453ca24ea766ba9db9c36f14f	0	0x40ccc082000000000000000000000000b8fb111f2fdb6d500830f4937892b928bba0eccb0000000000000000000000000000000000000000000000000000000000000001	16113065	0xaf39eac2db5fcdc6ad207a781eda6aa99e9fa9c3a7692d46963ca8e31e10ee0f
1190	0xf4aca7ec5d6352927677aed4ae2ca4be0a79fafb3561ea43173492b7c2697cf3	0x28c6c06298d514db089934071355e5743bf21d60	0xc944e90c64b2c07662a292be6244bdf05cda44a7	0	0xa9059cbb000000000000000000000000b3cfa9d45bc120bc91f540c317bbdfc23b9e551500000000000000000000000000000000000000000000009c1444ea52fbf09000	16113065	0xaf39eac2db5fcdc6ad207a781eda6aa99e9fa9c3a7692d46963ca8e31e10ee0f
1192	0x0c8f486ff3cc1b9f476d01ee6de2cefe79c09f87c8c0e8db089d9fa34aa0a03a	0x8989a26d82c14fc96e8c2abf3e8d60fc3c3f5eb3	0xeeeec6476073778077b40a73fe32e23a9876cab4	7.94e+16	0x2b66d72e000000000000000000000000000000000000000000000000000000000000002000000000000000000000000000000000000000000000000000000000000000ea65794a68624763694f694a46557a49314e694973496d74705a434936496a64684e6a526c5a6d51314c544a694e4463744e475a6a5a6931684f4463784c5445785a6d59354f5451345954646a4f434a392e436751784d6a553545674e56553051614a4759334e7a5a6d4d47566d4c574a6c4e6d55744e446c6b5a43316859544a6b4c5…	16113065	0xaf39eac2db5fcdc6ad207a781eda6aa99e9fa9c3a7692d46963ca8e31e10ee0f
1193	0xbcc416360226a6d070f928910c5c588d8d0d15c0e5c1d0aed7ba7b49b37fbab0	0x0b3ede005f36e07ce27b453c0e832b66b3871ff0	0xeb828447bfa75eee35f8d59aca4600a922e17e93	0	0x20c35c7d000000000000000000000000000000000000000000000000000000000000000000000000000000000000000000000000000000000000000000000000000000000000000000000000000000000000000000000000000000000000000000000000	16113065	0xaf39eac2db5fcdc6ad207a781eda6aa99e9fa9c3a7692d46963ca8e31e10ee0f
1194	0x82cf9d93f328c112fbbc6e302511e00c268e7ee89c7213a83015cff270c0db59	0x21a31ee1afc51d94c2efccaa2092ad1028285549	0x306550e04a67a98e5ee9d51a821b1de9464818c4	9.92e+16	0x	16113065	0xaf39eac2db5fcdc6ad207a781eda6aa99e9fa9c3a7692d46963ca8e31e10ee0f
1195	0xdd38f5dcc7a6502204baf26efb832814cfd3b6c2ae173e8730db5cafabd903a1	0x28c6c06298d514db089934071355e5743bf21d60	0xb5c83c3ef5a28dda9a8668af636df049de340118	4.86e+17	0x	16113065	0xaf39eac2db5fcdc6ad207a781eda6aa99e9fa9c3a7692d46963ca8e31e10ee0f
1198	0xdb29cae96c49c75f8348597e52f38ae0c58cf168a85217ed1e62c34c459f2225	0x1be210e7990eff6c07cb8cadcb9d077063ac3614	0x5f980fa4327882ae67c9a7a0ea81412588cda426	2100000000000000	0x	16113065	0xaf39eac2db5fcdc6ad207a781eda6aa99e9fa9c3a7692d46963ca8e31e10ee0f
1200	0x2097f587883f458d2bf16c966a1e20e4bccb67420ce0e3dae3257ec1271c8584	0x41aa7d375914ea1cb5a855642fc1924fd7e4ea17	0xeeeec6476073778077b40a73fe32e23a9876cab4	7.94e+16	0x2b66d72e000000000000000000000000000000000000000000000000000000000000002000000000000000000000000000000000000000000000000000000000000000ea65794a68624763694f694a46557a49314e694973496d74705a434936496a64684e6a526c5a6d51314c544a694e4463744e475a6a5a6931684f4463784c5445785a6d59354f5451345954646a4f434a392e436751784d6a553545674e56553051614a4445314f44646b4e446c684c54517a4d4749744e4441324e5330354e7a42684c5…	16113065	0xaf39eac2db5fcdc6ad207a781eda6aa99e9fa9c3a7692d46963ca8e31e10ee0f
1201	0x5b65f52e7053a34a2f183389c38f00fe439e27901e9a4faf86db94ab604ed18e	0x0079ce80043edc3325598e4a3b6293ab779bf174	0x519a48d5409010ecb6febe23c184663b4d972acb	0	0xeeac077b0000000000000000000000000079ce80043edc3325598e4a3b6293ab779bf174000000000000000000000000000000000000000000001da625909c8cfe5c8ccf00000000000000000000000000000000000000000000000000000000000000800000000000000000000000000000000000000000000000000000000000000001000000000000000000000000000000000000000000000000000000000000000ae5d652d0568ee03aeee64a04848339811b5fe150e080808064c31acae71ec4d6e9d6a…	16113065	0xaf39eac2db5fcdc6ad207a781eda6aa99e9fa9c3a7692d46963ca8e31e10ee0f
1202	0x8d93f12e2d446e6fe34e442ed9e3e432360e6fb6e91e2b01c657840aac619c4a	0x080086911d8c78008800fae75871a657b77d0082	0x055475920a8c93cffb64d039a8205f7acc7722d3	0	0x022c0d9f000000000000000000000000000000000000000000000000000000e18bb24f440000000000000000000000000000000000000000000000000000000000000000000000000000000000000000ba22001f44508d0f00000facd4004f006bb3008a000000000000000000000000000000000000000000000000000000000000008000000000000000000000000000000000000000000000000000000000000000880000000000000000000000000000000000000000000001bc4ae7aad3abdc22d900000…	16113065	0xaf39eac2db5fcdc6ad207a781eda6aa99e9fa9c3a7692d46963ca8e31e10ee0f
1204	0x03c8c5202afe434e96e4ee2962c58b37a5f90c3d1a6bd70a261801b036e83b0a	0xa0c85a2ae7ccda6b6a02463e2f65b64171735a99	0xa0b86991c6218b36c1d19d4a2e9eb0ce3606eb48	0	0xa9059cbb0000000000000000000000007eb6c83ab7d8d9b8618c0ed973cbef71d1921ef200000000000000000000000000000000000000000000000000000002540be400	16113065	0xaf39eac2db5fcdc6ad207a781eda6aa99e9fa9c3a7692d46963ca8e31e10ee0f
1205	0x9b45013991270140ba09637f6b6a2df9577a2c198d40ad347d6c1e2660c96228	0x1be210e7990eff6c07cb8cadcb9d077063ac3614	0xa7046366709e77fd91c76b856699dc14486289f6	2100000000000000	0x	16113065	0xaf39eac2db5fcdc6ad207a781eda6aa99e9fa9c3a7692d46963ca8e31e10ee0f
1207	0xba7c176c1df9bfdf4dfecd06b0a5a6b873f134badc879efee8dbb983794ac485	0x5e223d070726c6820420c06b2dc90cf50539d86d	0xcf561e688c1bcb193aa7f02c1f7538fb74d4265e	3.5e+17	0x	16113065	0xaf39eac2db5fcdc6ad207a781eda6aa99e9fa9c3a7692d46963ca8e31e10ee0f
1208	0x504e5e8731916b463de6a484cde0b43deed8adf1933db043e77e7208778e6d4f	0x4e5b2e1dc63f6b91cb6cd759936495434c7e972f	0xdac17f958d2ee523a2206206994597c13d831ec7	0	0xa9059cbb000000000000000000000000ba6b31bdd514372beb1216e477ca57073ca3ef1e0000000000000000000000000000000000000000000000000000000094e43218	16113065	0xaf39eac2db5fcdc6ad207a781eda6aa99e9fa9c3a7692d46963ca8e31e10ee0f
1210	0x5bdbc83e9c07d0ac9cb455c4e55d42a97ffc37d729a3b5c23bd2779a8f5da5f2	0xaa957b57e10b54cb09a91831375f88cb0aaac297	0xe2efbb43fe5df9249987d6700b3a323398170b41	0	0x1dbf3bc70000000000000000000000000000000000000000000000000000000000003a98	16113065	0xaf39eac2db5fcdc6ad207a781eda6aa99e9fa9c3a7692d46963ca8e31e10ee0f
1211	0xfe11a49c04a5c3167ea3dac2ddf2bf66354149ee318e964756c68364ff0a04e9	0x28c6c06298d514db089934071355e5743bf21d60	0xdac17f958d2ee523a2206206994597c13d831ec7	0	0xa9059cbb000000000000000000000000f28d641ad4847b7edfba54a6099f569e7af02b88000000000000000000000000000000000000000000000000000000002725f900	16113065	0xaf39eac2db5fcdc6ad207a781eda6aa99e9fa9c3a7692d46963ca8e31e10ee0f
1212	0xa9f45a8ce58ce9f0761900bf434c1567c2c1f53f7fbec837c717f81908ebe138	0x2d11cce03a9fa823d6914d09fe2bec24da074d82	0x5564886ca2c518d1964e5fcea4f423b41db9f561	0	0x432ced046b6f6e696e6b6c696a6b687569732e6f67000000000000000000000000000000	16113065	0xaf39eac2db5fcdc6ad207a781eda6aa99e9fa9c3a7692d46963ca8e31e10ee0f
1214	0x59daa94163c8ee73a91ae54dc55ae9eca01325e30d1ea464fc7c8327d9f967ec	0x56eddb7aa87536c09ccc2793473599fd21a8b17f	0xdac17f958d2ee523a2206206994597c13d831ec7	0	0xa9059cbb000000000000000000000000a6e15f3bae4b1c7bb9bf025104d2f0e5147a99bf0000000000000000000000000000000000000000000000000000000002f7e340	16113065	0xaf39eac2db5fcdc6ad207a781eda6aa99e9fa9c3a7692d46963ca8e31e10ee0f
1215	0xd76a91ab652f001424c142e66fbc6b27bb93ee7d9bc3a339067f976bc69de4f5	0x9696f59e4d72e237be84ffd425dcad154bf96976	0x2d0802a58400b4fd922d076be386a0d24ebb20d4	3.34e+16	0x	16113065	0xaf39eac2db5fcdc6ad207a781eda6aa99e9fa9c3a7692d46963ca8e31e10ee0f
1221	0xc876cb0e8a3d10f564b5f68c4ade865adf77e104971cc4342ade2c1cb8f6131c	0xd5dce1b400becee674c9f06e11da9b491ee5e089	0x619f793e2d7e077986d06630c11c6c0563eb28e6	2500000000000000	0x8e77fa29000000000000000000000000000000000000000000000000000000000000000e000000000000000000000000000000000000000000000000000000000000000400000000000000000000000000000000000000000000000000000000000000000000000000000000000000000000000000000000000000000000000000000000	16113064	0x8137fa8c50e85ceaebde9db149c3b35d119f958ec538dd26dbb986ecae9b1705
1222	0x90e6e2d18cae2e65ce6bd449b1cddddfddb391ff0af95e341d4393870a0ab503	0x1be210e7990eff6c07cb8cadcb9d077063ac3614	0x0353191ac29ce1c3d3e9c609c69ab91534e8b665	2100000000000000	0x	16113064	0x8137fa8c50e85ceaebde9db149c3b35d119f958ec538dd26dbb986ecae9b1705
1224	0x402ad7cea7ffc5dec894a9c8ee35f2abfd5eb25b1402b3393116004ed9733714	0x1be210e7990eff6c07cb8cadcb9d077063ac3614	0xa45aa89f00c3260c0fa08130a5bd400d284da5cf	2100000000000000	0x	16113064	0x8137fa8c50e85ceaebde9db149c3b35d119f958ec538dd26dbb986ecae9b1705
1225	0xd3ceb5eab3c07a7659cc6b984f5ceb7e444f4d6cbe64c40712183b3615c62649	0x1c727a55ea3c11b0ab7d3a361fe0f3c47ce6de5d	0xdf686d3277f27adcec49f5eebbdc571d11d9e123	2.8e+17	0x	16113064	0x8137fa8c50e85ceaebde9db149c3b35d119f958ec538dd26dbb986ecae9b1705
1226	0x0739cca8b9317f244bcf9447f03ae2fc8bf420a2484cff247de17e786a29cbf5	0x4aa9c2562f57e459e7c707a7e76147e30dd58607	0x68b3465833fb72a70ecdf485e0e4c7bd8665fc45	0	0x5ae401dc00000000000000000000000000000000000000000000000000000000638ce5e3000000000000000000000000000000000000000000000000000000000000004000000000000000000000000000000000000000000000000000000000000000020000000000000000000000000000000000000000000000000000000000000040000000000000000000000000000000000000000000000000000000000000016000000000000000000000000000000000000000000000000000000000000000e4472b4…	16113064	0x8137fa8c50e85ceaebde9db149c3b35d119f958ec538dd26dbb986ecae9b1705
1231	0x04a0c49d0e2c7bdeed682fce7ea455938ec8e60bf2162317cb85b099a69ba8c4	0x3dd0280c23b267a5eaa72746f5985e7062964ce9	0x06450dee7fd2fb8e39061434babcfc05599a6fb8	0	0x9ff054df00000000000000000000000000000000000000000000000000000000000001a1	16113064	0x8137fa8c50e85ceaebde9db149c3b35d119f958ec538dd26dbb986ecae9b1705
1232	0x41f80620440a9afdf10ac2b985e68d7d5130a5f5307cf333ff74fed8b5ea1b66	0x68927b4c9d4d06ca8ddb8dde366985c08bc7007e	0x6b175474e89094c44da98b954eedeac495271d0f	0	0x095ea7b300000000000000000000000024946bcbbd028d5abb62ad9b635eb1b1a67af668ffffffffffffffffffffffffffffffffffffffffffffffffffffffffffffffff	16113064	0x8137fa8c50e85ceaebde9db149c3b35d119f958ec538dd26dbb986ecae9b1705
1233	0xe12a0b8147ea2dea4cc22bd7254636ff8c05db934421844eb6fe6164c1cfb552	0xa60da32a023a7727d8c0561aa5ee38426e86fd07	0x9c7ddafe54dca9a0aaf6f29d0a04dfd382600ac5	3.95e+16	0x	16113064	0x8137fa8c50e85ceaebde9db149c3b35d119f958ec538dd26dbb986ecae9b1705
1234	0xbf280d9ae62fa440fdaac71135c94b545bc89d3e86c39b452616fab28ddc5dfe	0xf7858da8a6617f7c6d0ff2bcafdb6d2eedf64840	0xfe361b164b4a4b80047d90b2d39942df1b5d3f56	1.64e+16	0x	16113064	0x8137fa8c50e85ceaebde9db149c3b35d119f958ec538dd26dbb986ecae9b1705
1236	0x2e092793ab4855dbf224793257fb79fc3710cb267d9e158cf468a8e5afaf6439	0xd63168ee0ea681fe60584dcec29374ac1a4282e7	0xe66b31678d6c16e9ebf358268a790b763c133750	0	0x5cf5402600000000000000000000000000000000000000000000000000000000000000c0000000000000000000000000a0b86991c6218b36c1d19d4a2e9eb0ce3606eb48000000000000000000000000a0b86991c6218b36c1d19d4a2e9eb0ce3606eb48000000000000000000000000000000000000000000000000000000000bcd3d80000000000000000000000000eeeeeeeeeeeeeeeeeeeeeeeeeeeeeeeeeeeeeeee00000000000000000000000000000000000000000000000000000000001e848000000…	16113064	0x8137fa8c50e85ceaebde9db149c3b35d119f958ec538dd26dbb986ecae9b1705
1240	0x4322395dc3a4e1de39883f7673343909187553db359b2d50d6ed18aab1ccebcb	0x87cbc48075d7aa1760ac71c41e8bc289b6a31f56	0x514910771af9ca656af840dff83e8264ecf986ca	0	0xa9059cbb0000000000000000000000007e26d3f2285de1fe4ae43539343106bce007a3aa0000000000000000000000000000000000000000000000000853a0d2313c0000	16113064	0x8137fa8c50e85ceaebde9db149c3b35d119f958ec538dd26dbb986ecae9b1705
1241	0x77d916b06838219da436a0353c376d75808f4a1e0e50c9afb51e8edc86ad1fe7	0xfa46908b587f9102e81ce6c43b7b41b52881c57f	0xfbd2541e316948b259264c02f370ed088e04c3db	0	0xd0f8934400000dc9cb0000150000130000000000000000000000000000000000000100000000638cd0cd0000f5dc7900000100000000638cd14b0000f5dc8300000100000000638cd26e0000f5dc9a00000100000000638cd2ab0000f5dc9f00000100000000638cd2ab0000f5dca000000100000000638cd3260000f5dca900000100000000638cd4550000f5dcc300000100000000638cd4d40000f5dccd00000400000000638cd57f0000f5dcdc00000100000000638cd7240000f5dcff000001000000006…	16113064	0x8137fa8c50e85ceaebde9db149c3b35d119f958ec538dd26dbb986ecae9b1705
1242	0x71f35cc8a4b906d8b8a368b1c52a47ef9055beeb064221e2a969f7d615bebb39	0xb713d61e3b42e2c73286bc748b89c05e46a0ba15	0x1968f0bb48fca3237a15ea5d7c674bef8f2a9839	4.86e+16	0x	16113064	0x8137fa8c50e85ceaebde9db149c3b35d119f958ec538dd26dbb986ecae9b1705
1243	0x29a2e1b9d3c6f9e4a2668b72f33e36a1798396494fb7091f8df2c185f349705b	0x1bc5fea3b62f6cfb84259d629059a5b1111aa6af	0x98c5b40c18ab19c53324e006fa279fc8904137bd	0	0xa22cb46500000000000000000000000000000000000111abe46ff893f3b2fdf1f759a8a80000000000000000000000000000000000000000000000000000000000000001	16113064	0x8137fa8c50e85ceaebde9db149c3b35d119f958ec538dd26dbb986ecae9b1705
1244	0x478731d610f3413990afc82953bf2ea82c3761dbc0057312cc6fc9cba0e98b26	0x710bda329b2a6224e4b44833de30f38e7f81d564	0xb8901acb165ed027e32754e0ffe830802919727f	0	0x23c452cd00000000000000000000000009fbb3e9114e6b5a938f591c8bf75203d807550700000000000000000000000000000000000000000000000002060cf5a3de88181f1ada1a11e72bf7e9e929ec8ac1efaec56174eff7306d15a98c53f3f6eb44730000000000000000000000000000000000000000000000000006755c9be83be3	16113064	0x8137fa8c50e85ceaebde9db149c3b35d119f958ec538dd26dbb986ecae9b1705
1245	0x9c29bebc427fd220a7df619d1816de77b754c8f22851dec767070186f0ab34e4	0xad3c36eb6bea62e7e3397d32534f78c5a6c3b003	0xb5588c411ba0bb7d38865fdc51d082d004e519f7	0	0x095ea7b300000000000000000000000068b3465833fb72a70ecdf485e0e4c7bd8665fc45ffffffffffffffffffffffffffffffffffffffffffffffffffffffffffffffff	16113064	0x8137fa8c50e85ceaebde9db149c3b35d119f958ec538dd26dbb986ecae9b1705
1246	0x8cd8e7333db77a28c577404f2203ec0619386943a90d87fd48f1bdfc7f4d8e9f	0x3d6c8d09f33873c73ad60b54f1486cac3c2647a2	0xeeeec6476073778077b40a73fe32e23a9876cab4	7.94e+16	0x2b66d72e000000000000000000000000000000000000000000000000000000000000002000000000000000000000000000000000000000000000000000000000000000ea65794a68624763694f694a46557a49314e694973496d74705a434936496a64684e6a526c5a6d51314c544a694e4463744e475a6a5a6931684f4463784c5445785a6d59354f5451345954646a4f434a392e436751784d6a553545674e56553051614a475130597a6b7a4e5463324c54637a4d444d744e444a6c597931684d6d4a694c5…	16113064	0x8137fa8c50e85ceaebde9db149c3b35d119f958ec538dd26dbb986ecae9b1705
1247	0x39b195c74c3e45f9feebe089fc3895ab9a1ba26149768f636822eacfcfa56e99	0x3137344165733fb00cfae6a2c9ac3cf9726abbaa	0x45e2357728369e03c0b2cd542a80ff394b3cc832	1.32e+16	0x	16113064	0x8137fa8c50e85ceaebde9db149c3b35d119f958ec538dd26dbb986ecae9b1705
1248	0x457faf98e9dc46160c30c58bc022e92aca2b4e0a2986319964d8eb51b8a65eb0	0x5c6edf201ac2db0b169288793dc2b5fb36a89f1e	0x81196bb8d26b08ecc32e24a26664a3ce57af8b49	7190000000000000	0x	16113064	0x8137fa8c50e85ceaebde9db149c3b35d119f958ec538dd26dbb986ecae9b1705
1249	0x6f78026f98a21170c22126d18f63646b5158845ea2f6079d5b036cc2ffe8f29e	0xed06646805f6e809633099d28ae35f02cea9f6c9	0x2fbf23b619e2a5bf6386b4761ea218c4b6a92589	1e+16	0x	16113064	0x8137fa8c50e85ceaebde9db149c3b35d119f958ec538dd26dbb986ecae9b1705
1250	0xe01343c3ad5031bac14dacf816af45f332efa7f862a8586b6bb7a641cf3971c9	0xe3748aa584c43f55fb252e45f719fbef32fb631e	0xa5ae87b40076745895bb7387011ca8de5fde37e0	0	0xa22cb4650000000000000000000000001e0049783f008a0085193e00003d00cd54003c710000000000000000000000000000000000000000000000000000000000000001	16113064	0x8137fa8c50e85ceaebde9db149c3b35d119f958ec538dd26dbb986ecae9b1705
1251	0xfc6c74d6b462d66cc4af570f3c682bedb710a8bf8bd8099ed13bf313b1fb012e	0x1be210e7990eff6c07cb8cadcb9d077063ac3614	0x6167c5d6efd2c38e02ec4487567ddd565983b628	2100000000000000	0x	16113064	0x8137fa8c50e85ceaebde9db149c3b35d119f958ec538dd26dbb986ecae9b1705
1252	0x732806ab54e1a9a7e269b8c4f4860da86c572c73606aa8802da0e966c7542bec	0x8d921e4e3ce08e06ff28f74939c7f0c5c395ff6c	0x7a250d5630b4cf539739df2c5dacb4c659f2488d	1e+17	0xb6f9de95000000000000000000000000000000000000000000000000000000000000000000000000000000000000000000000000000000000000000000000000000000800000000000000000000000008d921e4e3ce08e06ff28f74939c7f0c5c395ff6c00000000000000000000000000000000000000000000000000000000638ce1350000000000000000000000000000000000000000000000000000000000000002000000000000000000000000c02aaa39b223fe8d0a0e5c4f27ead9083c756cc200000…	16113064	0x8137fa8c50e85ceaebde9db149c3b35d119f958ec538dd26dbb986ecae9b1705
1254	0x857a794d25ae791afd0178163e708be9e44231d303da38d39c8184168f08b86b	0x1be210e7990eff6c07cb8cadcb9d077063ac3614	0x728d1be86daa532a8e7a47802d6326857350149b	2100000000000000	0x	16113064	0x8137fa8c50e85ceaebde9db149c3b35d119f958ec538dd26dbb986ecae9b1705
1258	0xdaf2b8032c327ca3c5862728f44e826ff01315d6d6d4f8aa2f1f7a44e32a1d84	0x908564a38b010828f82f30b610372cab2af4747d	0x00000000006c3852cbef3e08e8df289169ede581	1e+16	0xfb0f3ee10000000000000000000000000000000000000000000000000000000000000020000000000000000000000000000000000000000000000000000000000000000000000000000000000000000000000000000000000000000000000000000000000000000000000000000000000000000000000000000000000022a392c68f6000000000000000000000000000f8cc4519cbd022f5c6d0da7d86677d9ee18397f1000000000000000000000000004c00500000ad104d7dbd00e3ae0a5c00560c0000000…	16113064	0x8137fa8c50e85ceaebde9db149c3b35d119f958ec538dd26dbb986ecae9b1705
1260	0x3fa780dd7ae3a7ee639100dade5af73a8e2fc4145afa3b8750a165ce2857df66	0xffec0067f5a79cff07527f63d83dd5462ccf8ba4	0xb62132e35a6c13ee1ee0f84dc5d40bad8d815206	0	0xa9059cbb0000000000000000000000009c497096c533f0ebb6fc803a23719404d86e560700000000000000000000000000000000000000000000000690d4087a43e98000	16113064	0x8137fa8c50e85ceaebde9db149c3b35d119f958ec538dd26dbb986ecae9b1705
1262	0xe1ed07e775fcba0a8acd79dd9f098b0aad7acb0fd191501b48d657cfedf1ce05	0xcbb2cfe9b54a2168fbcece683b487e20957b78d1	0x06450dee7fd2fb8e39061434babcfc05599a6fb8	0	0x9ff054df00000000000000000000000000000000000000000000000000000000000001af	16113064	0x8137fa8c50e85ceaebde9db149c3b35d119f958ec538dd26dbb986ecae9b1705
1263	0x4a9f33195be481c4d972baa7d65c1d62441695b9f57fe3a29841cd547678068f	0xfe94f5d5cb7e6bbe20f8f03127940d1b5f11f4b1	0x7a250d5630b4cf539739df2c5dacb4c659f2488d	5.43e+17	0xfb3bdb410000000000000000000000000000000000000000000000000000007b667c4e800000000000000000000000000000000000000000000000000000000000000080000000000000000000000000fe94f5d5cb7e6bbe20f8f03127940d1b5f11f4b100000000000000000000000000000000000000000000000000000000638ce5e30000000000000000000000000000000000000000000000000000000000000002000000000000000000000000c02aaa39b223fe8d0a0e5c4f27ead9083c756cc200000…	16113064	0x8137fa8c50e85ceaebde9db149c3b35d119f958ec538dd26dbb986ecae9b1705
1264	0xc79058a26f546cb4cf8694c24a901f65283080a1c03e8a518913ebd88a82e9df	0x63e351ef8af24938a6a1e12316cce24a1adff7e0	0x06450dee7fd2fb8e39061434babcfc05599a6fb8	0	0x9ff054df00000000000000000000000000000000000000000000000000000000000001a9	16113064	0x8137fa8c50e85ceaebde9db149c3b35d119f958ec538dd26dbb986ecae9b1705
1265	0xe0c74fbb5f9845923271bc28885080b9b682f042ac1de3c93adf7fdc8325fa68	0x235d46be238bd8fdd3d20fff883ce69e9fecfcb1	0x7a250d5630b4cf539739df2c5dacb4c659f2488d	1.37e+18	0x7ff36ab50000000000000000000000000000000000000000b2288c63536ac41c66c6f4420000000000000000000000000000000000000000000000000000000000000080000000000000000000000000dcf9527f8f83d00b5556d70bbe67b35dd4d9b1bc00000000000000000000000000000000000000000000000000000000638ce44c0000000000000000000000000000000000000000000000000000000000000002000000000000000000000000c02aaa39b223fe8d0a0e5c4f27ead9083c756cc200000…	16113064	0x8137fa8c50e85ceaebde9db149c3b35d119f958ec538dd26dbb986ecae9b1705
1267	0xb0a8974c387b18a21ee3f0995dcbea0d5d7ca88755c71ec63b60263223d649f8	0x39ef1da92277310427cebeeb8e9db3cb5dee0021	0xeeeec6476073778077b40a73fe32e23a9876cab4	7.94e+16	0x2b66d72e000000000000000000000000000000000000000000000000000000000000002000000000000000000000000000000000000000000000000000000000000000ea65794a68624763694f694a46557a49314e694973496d74705a434936496a64684e6a526c5a6d51314c544a694e4463744e475a6a5a6931684f4463784c5445785a6d59354f5451345954646a4f434a392e436751784d6a553545674e56553051614a4452684d546b775a6d4d774c574933597a55744e475a6a5a5331694d6a6c6a4c5…	16113064	0x8137fa8c50e85ceaebde9db149c3b35d119f958ec538dd26dbb986ecae9b1705
1268	0x8512e6d4df7f457e4b249a96d56dab62e504d7dbb8ff22018d1bd06ecf072147	0x8ca4cb4b261d4e26fafd4bd40427a2b2dc93413c	0x8ca4cb4b261d4e26fafd4bd40427a2b2dc93413c	0	0x	16113064	0x8137fa8c50e85ceaebde9db149c3b35d119f958ec538dd26dbb986ecae9b1705
1269	0x27c6bbc38458b3089d610a8d4c6f8a19bc8868ec450de3d6dd5efa00662e7393	0x2d23aa742499e3230356c0138befda3354bb2550	0x8e8f404616c22d2a11ce61b9837e0cb53241fbcb	2000000000000000	0xa0712d680000000000000000000000000000000000000000000000000000000000000002	16113064	0x8137fa8c50e85ceaebde9db149c3b35d119f958ec538dd26dbb986ecae9b1705
1270	0x9f49896d5a7e38b363ed9464053c49f27c492cd8f7f285b3b8a94eb2f9a0a21e	0x00bdb5699745f5b860228c8f939abf1b9ae374ed	0x1522900b6dafac587d499a862861c0869be6e428	0	0x3912521500000000000000000000000051be96aea9aad047d951ed17da084f96f19ba14c000000000000000000000000000000000000000000000000001ff973cafa800000000000000000000000000000000000000000000000000000000000000000c0000000000000000000000000000000000000000000000000000000006396195900000000000000000000000000000000000000000000000000000000000ff10300000000000000000000000000000000000000000000000000000000000000e000000…	16113064	0x8137fa8c50e85ceaebde9db149c3b35d119f958ec538dd26dbb986ecae9b1705
1273	0x142d4ed807c29efbd1c4d6048ddaffdfc7616b27f3f31d07f712b53e313f0ef9	0x8ca4cb4b261d4e26fafd4bd40427a2b2dc93413c	0x75cda57917e9f73705dc8bcf8a6b2f99adbdc5a5	0	0x2e4dbe8f000000000000000000000000000000000000000000000000000000000000254300000000000000000000000091eeda83433690056e22fe33f0e2ffc754ba107600000000000000000000000000000000000000000000000000000000043b95cb000000000000000000000000000000000000000000000000000000000000254300000000000000000000000000000000000000000000000000000000000000a000000000000000000000000000000000000000000000000000000000000000415bcba…	16113064	0x8137fa8c50e85ceaebde9db149c3b35d119f958ec538dd26dbb986ecae9b1705
1274	0x903be0869ce1a705b98e92cdbc6b7f674a0ca1a43a8c78438bdbd00b78e27a12	0xa8c086722e279226b32cbffe24942a5ab023c04d	0x68b3465833fb72a70ecdf485e0e4c7bd8665fc45	7.9e+16	0x5ae401dc00000000000000000000000000000000000000000000000000000000638ce5d700000000000000000000000000000000000000000000000000000000000000400000000000000000000000000000000000000000000000000000000000000001000000000000000000000000000000000000000000000000000000000000002000000000000000000000000000000000000000000000000000000000000000e4472b43f30000000000000000000000000000000000000000000000000118a0fc8acee…	16113064	0x8137fa8c50e85ceaebde9db149c3b35d119f958ec538dd26dbb986ecae9b1705
1276	0x1837e5f7d1a65c29e55c74d8077063230578f3613ddeff42480a2cd0f3d6afbb	0x8d381481be81184259dd6e3daef415bccf71a610	0xdef1c0ded9bec7f1a1670819833240f027b25eff	0	0x7d49ec1a000000000000000000000000c02aaa39b223fe8d0a0e5c4f27ead9083c756cc2000000000000000000000000b8c77482e45f1f44de1745f52c74426c631bdd5200000000000000000000000000000000000000000000000002c68af0bb14000000000000000000000000000000000000000000000000000006f05b59d3b2000000000000000000000000000000000000000000000000000000000000000000000000000000000000000000008d381481be81184259dd6e3daef415bccf71a61000000…	16113064	0x8137fa8c50e85ceaebde9db149c3b35d119f958ec538dd26dbb986ecae9b1705
1277	0xe3c7e5361608d41d10d9228796d378ff06eea8d0e785e87b84a3c0ebf62601ef	0x4e5b2e1dc63f6b91cb6cd759936495434c7e972f	0xbc7c6f7d58f22ffcc701f318d71fcd261abf8f43	3410000000000000	0x	16113064	0x8137fa8c50e85ceaebde9db149c3b35d119f958ec538dd26dbb986ecae9b1705
1278	0x9812d81301ad4831fbc051897dbccea82f39f8bdc377baefd6ec5d828c5d27c3	0x0554e2a3fb70754c7bf012598c2a723c0e0feff3	0xdac17f958d2ee523a2206206994597c13d831ec7	0	0xa9059cbb000000000000000000000000d867fecc1636ccf9b52f37bb2448eb5d64b6ed54000000000000000000000000000000000000000000000000000000019521d2ac	16113064	0x8137fa8c50e85ceaebde9db149c3b35d119f958ec538dd26dbb986ecae9b1705
1280	0x1f60780af987ec3fd813b48e6e56f5c05982e9dc0ebf10db5d3fc5e25732aea7	0x082203a8c71bcd069f517f356b7de5aadde5e9a5	0x0a923c8e3eb0e33beb917340a748defbef5e1bdf	7.35e+17	0x	16113064	0x8137fa8c50e85ceaebde9db149c3b35d119f958ec538dd26dbb986ecae9b1705
1281	0x0538eb5c0aa91a15a554e613c2af984fdb977726ae8fe4f22b5d2ab0f1bb7bc6	0xd551076646ddaeca92810c31bc42da56204310b0	0xeeeec6476073778077b40a73fe32e23a9876cab4	7.94e+16	0x2b66d72e000000000000000000000000000000000000000000000000000000000000002000000000000000000000000000000000000000000000000000000000000000ea65794a68624763694f694a46557a49314e694973496d74705a434936496a64684e6a526c5a6d51314c544a694e4463744e475a6a5a6931684f4463784c5445785a6d59354f5451345954646a4f434a392e436751784d6a553545674e56553051614a44553559544d325a6d526a4c5451784e5451744e44466c4e5331684f4459344c5…	16113064	0x8137fa8c50e85ceaebde9db149c3b35d119f958ec538dd26dbb986ecae9b1705
1282	0xd9768ac21fbbff54bcd8882c4c0184c2d0ef58c0ecabb003d44eb81c75713c25	0x68927b4c9d4d06ca8ddb8dde366985c08bc7007e	0x6b175474e89094c44da98b954eedeac495271d0f	0	0x095ea7b300000000000000000000000024946bcbbd028d5abb62ad9b635eb1b1a67af668ffffffffffffffffffffffffffffffffffffffffffffffffffffffffffffffff	16113064	0x8137fa8c50e85ceaebde9db149c3b35d119f958ec538dd26dbb986ecae9b1705
1283	0x8e7b47aee24b995c044a0890d37a4fce7279645e9b44f355bae78f0a6245427e	0x974caa59e49682cda0ad2bbe82983419a2ecc400	0xdac17f958d2ee523a2206206994597c13d831ec7	0	0xa9059cbb0000000000000000000000007fb27199f61271dbe8b7060a815b8626fe62998b0000000000000000000000000000000000000000000000000000000005eda3a0	16113064	0x8137fa8c50e85ceaebde9db149c3b35d119f958ec538dd26dbb986ecae9b1705
1284	0xa6a72de6028283be9639665e620c59c8cafcd57b5b97f9b0f6d1bedef77ab778	0x1be210e7990eff6c07cb8cadcb9d077063ac3614	0xff2dcaa3d72315a29eebe0fb1c511aea9c9330c0	2100000000000000	0x	16113064	0x8137fa8c50e85ceaebde9db149c3b35d119f958ec538dd26dbb986ecae9b1705
1286	0x1e238a9634e8f7d43d7f868fa33579bcb76c2329479bf0e682f25464771cc025	0xe4d2b6d685ba73f491d04763ac883cb1f75b2564	0x9ea307dc460230e77865206326bad338a3187b9b	0	0x095ea7b3000000000000000000000000617dee16b86534a5d792a4d7a62fb491b544111effffffffffffffffffffffffffffffffffffffffffffffffffffffffffffffff	16113064	0x8137fa8c50e85ceaebde9db149c3b35d119f958ec538dd26dbb986ecae9b1705
1288	0xec1b1ae943a0c7c2ec7bfd024ed983a500798feb4b5aedeed7bbcc9c2f7c814c	0x6dfc34609a05bc22319fa4cce1d1e2929548c0d7	0xdac17f958d2ee523a2206206994597c13d831ec7	0	0x23b872dd00000000000000000000000006d542807bd3de9d0cd8d0631bf3454a9cefefcc0000000000000000000000006dfc34609a05bc22319fa4cce1d1e2929548c0d70000000000000000000000000000000000000000000000000000000005e69ec0	16113064	0x8137fa8c50e85ceaebde9db149c3b35d119f958ec538dd26dbb986ecae9b1705
1289	0xa0a6617276eae50ceb9ddf0e2142ef94f21856b4efeac870dbf9cce972459ead	0xf0562d00fb1e89cd77e96b726ec5fc565b285a35	0xf95d3b9a15edec2620d6791b69d777d8678c03f1	0	0xa22cb4650000000000000000000000001e0049783f008a0085193e00003d00cd54003c710000000000000000000000000000000000000000000000000000000000000001	16113064	0x8137fa8c50e85ceaebde9db149c3b35d119f958ec538dd26dbb986ecae9b1705
1290	0x9fc67c218c2322f623d878cf71816c65e6f4e28071184caff8091c54be52c070	0x4e5f940c23cec8ae37b16429523e5e0b91ec271c	0xbc4e8115e17d96cfd8e3ecef2b0d6e19d00f70b2	0	0xa22cb46500000000000000000000000000000000000111abe46ff893f3b2fdf1f759a8a80000000000000000000000000000000000000000000000000000000000000001	16113064	0x8137fa8c50e85ceaebde9db149c3b35d119f958ec538dd26dbb986ecae9b1705
1292	0xa1415fa631c33daf0ad2d86988128429f8d668ca197fda149cd80a4224e580f7	0x8a5f72f91dcf8977e47fbd8065c16826c41e66b8	0x6dfc34609a05bc22319fa4cce1d1e2929548c0d7	2.6e+17	0x	16113064	0x8137fa8c50e85ceaebde9db149c3b35d119f958ec538dd26dbb986ecae9b1705
1293	0xb46ee3057be3f4d9029d64bf5d190b0e082f2f4f0d7491c909a849ffab796759	0x1a645faf265e493129606c6df0f42977394578d5	0xacf900c27e3e63983d4ca158890a696c8bd2d755	2740000000000000	0x	16113064	0x8137fa8c50e85ceaebde9db149c3b35d119f958ec538dd26dbb986ecae9b1705
1294	0xfe94e0f7aba78e1a02cca8fb4179554aa6ddac598f8b56472758aab157ab3203	0x710bda329b2a6224e4b44833de30f38e7f81d564	0xb8901acb165ed027e32754e0ffe830802919727f	0	0x23c452cd0000000000000000000000004f9bdd1dedbd414c113840046939dbd2b88cf2f6000000000000000000000000000000000000000000000000000aa7e0d5a752d457af4d1820a168337c7f3e4115b81981520b37becd94f4d9280ac618143468ce000000000000000000000000000000000000000000000000000684960401f01b	16113064	0x8137fa8c50e85ceaebde9db149c3b35d119f958ec538dd26dbb986ecae9b1705
1295	0xae11bb237401dbd4ddfdee8c903732a0ed59720872dfbfdaed0b7d0ec20affff	0x4a86ad8cfc8ac45fe670e01edb566845f879aa45	0xc02aaa39b223fe8d0a0e5c4f27ead9083c756cc2	0	0x2e1a7d4d0000000000000000000000000000000000000000000000000267547b7b190000	16113064	0x8137fa8c50e85ceaebde9db149c3b35d119f958ec538dd26dbb986ecae9b1705
1297	0xeebec87bf071efdcc877146deb064ae226d493f2e73cdf9f863c89342d012edf	0x1be210e7990eff6c07cb8cadcb9d077063ac3614	0x1cdeac426e4c54035731b8c1c58bdb090ea39da5	2100000000000000	0x	16113064	0x8137fa8c50e85ceaebde9db149c3b35d119f958ec538dd26dbb986ecae9b1705
1298	0x9d454608bae1b03531ebb9489cfa247c034d03bdeaba7df4af6f5dc3c0983796	0xc79e97201e9916df84095ee7fa20d3e032ab7429	0xeeeec6476073778077b40a73fe32e23a9876cab4	7.94e+16	0x2b66d72e000000000000000000000000000000000000000000000000000000000000002000000000000000000000000000000000000000000000000000000000000000ea65794a68624763694f694a46557a49314e694973496d74705a434936496a64684e6a526c5a6d51314c544a694e4463744e475a6a5a6931684f4463784c5445785a6d59354f5451345954646a4f434a392e436751784d6a553545674e56553051614a444135596a59344e6a6b314c574668593251744e4467784e6931694e44526d4c5…	16113064	0x8137fa8c50e85ceaebde9db149c3b35d119f958ec538dd26dbb986ecae9b1705
1299	0xb565a017f356f52fc5888b5216446876fb99344aecc941543344300890658d80	0xfe24a602a28e0dc67a02c689888a42566e77e2f4	0x68b3465833fb72a70ecdf485e0e4c7bd8665fc45	0	0x5ae401dc00000000000000000000000000000000000000000000000000000000638ce5cb000000000000000000000000000000000000000000000000000000000000004000000000000000000000000000000000000000000000000000000000000000020000000000000000000000000000000000000000000000000000000000000040000000000000000000000000000000000000000000000000000000000000016000000000000000000000000000000000000000000000000000000000000000e4472b4…	16113064	0x8137fa8c50e85ceaebde9db149c3b35d119f958ec538dd26dbb986ecae9b1705
1300	0xcf30ab02efae4bbaaa75c2c6a9deb4e265e27472028415b9dc3d85c0351522e3	0xd6a11fbf81ef026fc069cbc44f59f13ddfd4de9b	0x5780cfb0d2b9f92f4b491213ba9df7b4b991ca19	1.59e+16	0x	16113064	0x8137fa8c50e85ceaebde9db149c3b35d119f958ec538dd26dbb986ecae9b1705
1303	0xbcb5d34f340c05a1e4e29f33469d58a1e954dd40c824aa8bd1a9bd78c73a959d	0x4cbcbc6d44f8c1365d06ad777a3bc2e60986074a	0x68b3465833fb72a70ecdf485e0e4c7bd8665fc45	8.19e+16	0x5ae401dc00000000000000000000000000000000000000000000000000000000638ce5d7000000000000000000000000000000000000000000000000000000000000004000000000000000000000000000000000000000000000000000000000000000020000000000000000000000000000000000000000000000000000000000000040000000000000000000000000000000000000000000000000000000000000016000000000000000000000000000000000000000000000000000000000000000e442712…	16113064	0x8137fa8c50e85ceaebde9db149c3b35d119f958ec538dd26dbb986ecae9b1705
1305	0x8048e82ddcf979df5c51e489aa86c70d0670c0c9ebc69012ca6d2357a44c0329	0xd18e84b21b6acb69628ecb85f8074fd441478050	0x1aeea3a2da3a47ed7bcf84448d535285914b02b5	2.13e+16	0x	16113064	0x8137fa8c50e85ceaebde9db149c3b35d119f958ec538dd26dbb986ecae9b1705
1306	0x3677d8290980570b05dc9e63c3b3d598a02a767999014e38aece6b887e0de789	0x8588f3f69f7caabb2cfda31d8845fad56f9dbe4b	0x881d40237659c251811cec9c364ef91dc08d300c	2.75e+17	0x5f5755290000000000000000000000000000000000000000000000000000000000000080000000000000000000000000000000000000000000000000000000000000000000000000000000000000000000000000000000000000000003d0ff0b013b800000000000000000000000000000000000000000000000000000000000000000c00000000000000000000000000000000000000000000000000000000000000017616972737761704c696768743346656544796e616d696300000000000000000000000…	16113064	0x8137fa8c50e85ceaebde9db149c3b35d119f958ec538dd26dbb986ecae9b1705
1307	0x0a02c7314fbeff1b23656fc04c8d3eb7c20934bb68d6825b9f66bc4d0a6dd514	0x1be210e7990eff6c07cb8cadcb9d077063ac3614	0x76b21ae6c9481acd8318357cd63e1117b01e2e00	2100000000000000	0x	16113064	0x8137fa8c50e85ceaebde9db149c3b35d119f958ec538dd26dbb986ecae9b1705
1308	0xc408d41a9c5b087f82726086d647159c3d82d43e35d154e1ca3b5b85c3589696	0x562680a4dc50ed2f14d75bf31f494cfe0b8d10a1	0xdac17f958d2ee523a2206206994597c13d831ec7	0	0xa9059cbb0000000000000000000000001e684188a113b6d9c2a67fed24a0f17164aef6d20000000000000000000000000000000000000000000000000000000005f5e100	16113064	0x8137fa8c50e85ceaebde9db149c3b35d119f958ec538dd26dbb986ecae9b1705
1309	0xc9d2edb467759071d3e0af6685f23d3a92cd17b0d46c3598c5e6322a1421bff3	0x73aa9f1bf613c87b57afcbfdf6a259f9d4578115	0x3819f64f282bf135d62168c1e513280daf905e06	0	0xf812b9a400000000000000000000000000000000000000000000000000000000000000010000000000000000000000000000000000000000000000000000000000040024	16113064	0x8137fa8c50e85ceaebde9db149c3b35d119f958ec538dd26dbb986ecae9b1705
1314	0x33fcc4166781c1518ab7842a4857e69b3746704407212c4c8041018802ad3770	0x8864afd0c2e8fb24106503af89a9763daf387b55	0x00000000006c3852cbef3e08e8df289169ede581	0	0xfb0f3ee10000000000000000000000000000000000000000000000000000000000000020000000000000000000000000c36cf0cfcb5d905b8b513860db0cfe63f6cf9f5c00000000000000000000000000000178000000000000000000000000000000000000000000000000000000000000000000000000000000000000000000000001000000000000000000000000e179b3db9cb6c9e8316c13159535239fbecbcc66000000000000000000000000004c00500000ad104d7dbd00e3ae0a5c00560c0000000…	16113064	0x8137fa8c50e85ceaebde9db149c3b35d119f958ec538dd26dbb986ecae9b1705
1315	0x91f0dd5dafdde2e2e4ea4efc909a072a00a6fa1ab3f2c9b3924d9c6ba8680ddd	0x41d185c83b576afee192140a8d8348f5c4747669	0x01cf6b5684c7d9d0bbbd57a385e5f2b06d42771f	0	0x0fbf0a930000000000000000000000000000000000000000000000000000000000000020000000000000000000000000000000000000000000000000000000000000000200000000000000000000000000000000000000000000000000000000000004ce00000000000000000000000000000000000000000000000000000000000005eb	16113064	0x8137fa8c50e85ceaebde9db149c3b35d119f958ec538dd26dbb986ecae9b1705
1322	0x7e62c6236bcc9a1536d9b25068d7dd79cc7b80499fb90fab660213e4120dc0f2	0x911788d9b77f277e0394f0cf0cb5073985a372c0	0x9ade9ea6fd4fca08e27db8d2b607e3e30bcb0ab2	0	0x1b91154700000000000000000000000000000000000000000000000000000000000003ba	16113064	0x8137fa8c50e85ceaebde9db149c3b35d119f958ec538dd26dbb986ecae9b1705
1323	0xd375ec03db3ff198a3ce4ee9080d143dad4a793c4c24e86d3394901748b5c539	0xeae647120c53be5bfb31000218e60a7718a48cb7	0x9b091d2e0bb88ace4fe8f0fab87b93d8ba932ec4	0	0xa22cb4650000000000000000000000001e0049783f008a0085193e00003d00cd54003c710000000000000000000000000000000000000000000000000000000000000001	16113064	0x8137fa8c50e85ceaebde9db149c3b35d119f958ec538dd26dbb986ecae9b1705
1327	0xea5294ee572b650cbff5ad89b3dcdcb779a45d67903ebc4e819cd774042005fd	0x0758e77def8db3e078dd579a2e686a4543e5d6eb	0x00000000006c3852cbef3e08e8df289169ede581	0	0xe7acab24000000000000000000000000000000000000000000000000000000000000008000000000000000000000000000000000000000000000000000000000000006600000007b02230091a7ed01230072f7006a004d60a8d4e71d599b8104250f0000000000000000000000000000000000000000000000000000000000000000000000000000000000000000000000000000000000000000000000000000000000a0000000000000000000000000000000000000000000000000000000000000000100000…	16113064	0x8137fa8c50e85ceaebde9db149c3b35d119f958ec538dd26dbb986ecae9b1705
1329	0xb61256eff7657345c523697e777592da4a6e1229ed5ae61cfe5bfc7a9d61526a	0x0acdd0fefb605957dfcba4816d77c43dec3f1f79	0x00dfd287e730cd8b8b006675e83a141b69d88a76	3000000000000000	0x	16113064	0x8137fa8c50e85ceaebde9db149c3b35d119f958ec538dd26dbb986ecae9b1705
1330	0x6c222625bb14add13e0ce0bb6d89c9cbf21e5479fa8a17553a60dbbfc4ce6871	0x1af331dc34dd7c5c62af28b5685328318b61888a	0x00000000006c3852cbef3e08e8df289169ede581	1.58e+17	0xed98a57400000000000000000000000000000000000000000000000000000000000000a000000000000000000000000000000000000000000000000000000000000010e000000000000000000000000000000000000000000000000000000000000012800000007b02230091a7ed01230072f7006a004d60a8d4e71d599b8104250f00000000000000000000000000000000000000000000000000000000000000000003000000000000000000000000000000000000000000000000000000000000000300000…	16113064	0x8137fa8c50e85ceaebde9db149c3b35d119f958ec538dd26dbb986ecae9b1705
1331	0x3a3aebbf00ec60115e25c2f20393df758dab06433e30c0b583612b425a59503e	0xc36f427c53202a9759f774fa2451b6709d0f9719	0x477f885f6333317f5b2810ecc8afadc7d5b69dd2	0	0x42842e0e000000000000000000000000c36f427c53202a9759f774fa2451b6709d0f9719000000000000000000000000c6446e94ca88b80f16ac18a6edccb1129eebfcd200000000000000000000000000000000000000000000000000000000000020e6	16113064	0x8137fa8c50e85ceaebde9db149c3b35d119f958ec538dd26dbb986ecae9b1705
1332	0x721f34d8c1aaf3c6931ae31e7274ea4bf5afeab51c47a8e61caa81a5a14a837c	0xcc09d6d8d704782e0b3b489038e80e4baa08622e	0x9848482da3ee3076165ce6497eda906e66bb85c5	10000000000000	0x0b4c7e4d000000000000000000000000000000000000000000000000000009184e72a0000000000000000000000000000000000000000000000000000000000000000000000000000000000000000000000000000000000000000000000008bf135b39a2	16113064	0x8137fa8c50e85ceaebde9db149c3b35d119f958ec538dd26dbb986ecae9b1705
1333	0x413b510070067145fc8c7a77583c4424f1787a0ac32c2b1d4ba0a36bb659050b	0xa4b1e63cb4901e327597bc35d36fe8a23e4c253f	0x1c479675ad559dc151f6ec7ed3fbf8cee79582b6	0	0x8f111f3c000000000000000000000000000000000000000000000000000000000000958700000000000000000000000000000000000000000000000000000000000000c00000000000000000000000000000000000000000000000000000000000048e10000000000000000000000000e64a54e2533fd126c2e452c5fab544d80e2e4eb5000000000000000000000000000000000000000000000000000000000146897d0000000000000000000000000000000000000000000000000000000001468b0b00000…
1335	0x085b37ab5e6b01a341dfe3cce8d7f4d6283a8f1094bece19a56da8862ee81945	0x22badc72011497ba95176ba35a563127cc788e73	0x49642110b712c1fd7261bc074105e9e44676c68f	0	0x095ea7b300000000000000000000000068b3465833fb72a70ecdf485e0e4c7bd8665fc45ffffffffffffffffffffffffffffffffffffffffffffffffffffffffffffffff	16113064	0x8137fa8c50e85ceaebde9db149c3b35d119f958ec538dd26dbb986ecae9b1705
1336	0xac44d8ae160a1e1fba04c85b4ed1327c5ec78c770f6b168d5f47f4f0a24ef487	0xbc3613715492a94f76aaab581dcdfe61d8858b4b	0x806138db9a18f06c3c22c18b102b1468dad2bb78	0	0x42842e0e000000000000000000000000bc3613715492a94f76aaab581dcdfe61d8858b4b00000000000000000000000045eb0febe82c06d991d374d289d931d4501daa120000000000000000000000000000000000000000000000000000000000000721360c6ebe	16113063	0xde1d0650d403a8bd9354fbeef713d209b434293f46e4d18e2a970d564c0b0445
1337	0x17203227419c1e6f932ff3d78d92814a40ad83e72902379380cbaeb60cddcd5d	0x21a31ee1afc51d94c2efccaa2092ad1028285549	0xdac17f958d2ee523a2206206994597c13d831ec7	0	0xa9059cbb000000000000000000000000ef66a05afc86e1909ff1ff2e4e0e02d11bd8b7a4000000000000000000000000000000000000000000000000000000001f246b51	16113063	0xde1d0650d403a8bd9354fbeef713d209b434293f46e4d18e2a970d564c0b0445
1340	0x20690ad0fb9f6984c6f86d7aa639484d760784b26528e46e0dc215aa76a1e545	0x7d411c4279a96069fe32de0c0eab4a964e8ed9c4	0x6f7b59cd6565b9d17982956e89c2b638d5298a45	597000000000000	0x	16113063	0xde1d0650d403a8bd9354fbeef713d209b434293f46e4d18e2a970d564c0b0445
1341	0xa2f451eee7374fcf75e2d8b152372b765904d751fe3c26449e30f7e38297daa1	0x28c6c06298d514db089934071355e5743bf21d60	0x18aaa7115705e8be94bffebde57af9bfc265b998	0	0xa9059cbb000000000000000000000000887925d17e5d7405108bd8d23015fd1a26ca5d670000000000000000000000000000000000000000000012ff52c1ca0fb6814000	16113063	0xde1d0650d403a8bd9354fbeef713d209b434293f46e4d18e2a970d564c0b0445
1343	0x8bee93162008219bcc803a99b9694d2d683fab5fd23cdf4f0f0016a434689a9a	0x2fde41f3f6d56c1c89e7ab93b4f4ae29c0cce17d	0x07bb70126e38427baa57c353f4b8878bd61a1cb3	6.93e+16	0x	16113063	0xde1d0650d403a8bd9354fbeef713d209b434293f46e4d18e2a970d564c0b0445
1345	0x327e5773c176a6b5803f8e0c00d6a24be4af3b7adce4153e76ff617829eb3fff	0x78c56c45485ac5b2593513eb3d1b9f46b7e18a59	0xe97694b8c0f8787686cf497877c3b17f4dc8177b	1990000000000000	0x	16113063	0xde1d0650d403a8bd9354fbeef713d209b434293f46e4d18e2a970d564c0b0445
1347	0xee1cb9b18ec5c722801e0794aa2049774ef961042abe67f28a7c208a7cb1a7bd	0x58070dd4b871149ce4eed3b2c9fde52dbfa8ce1e	0x43cc953fb952d10c8f810267092fb12145d56d40	2.76e+16	0x8b3c99e300000000000000000000000000000000000000000000000000000000638cdedb	16113063	0xde1d0650d403a8bd9354fbeef713d209b434293f46e4d18e2a970d564c0b0445
1349	0x1e8dc70a9439dcdb93a8a80fe2ea1104cc97f91dc6fbd14799f49bdd25852e59	0x0acdd0fefb605957dfcba4816d77c43dec3f1f79	0xe241eeb20f18cd4162efca2ccde7cc29b5f95015	3000000000000000	0x	16113063	0xde1d0650d403a8bd9354fbeef713d209b434293f46e4d18e2a970d564c0b0445
1350	0x48e737621ce78428bdad2e18319255933d385769466161c8ee964d1afb46329e	0x2356ac18fd5c1ad904b8aa1016c39fc29bbed1a2	0x68b3465833fb72a70ecdf485e0e4c7bd8665fc45	0	0x5ae401dc00000000000000000000000000000000000000000000000000000000638ce5cb0000000000000000000000000000000000000000000000000000000000000040000000000000000000000000000000000000000000000000000000000000000100000000000000000000000000000000000000000000000000000000000000200000000000000000000000000000000000000000000000000000000000000104472b43f30000000000000000000000000000000000000000000000000000000011e1a…	16113063	0xde1d0650d403a8bd9354fbeef713d209b434293f46e4d18e2a970d564c0b0445
1351	0xa8b684db7754a4bea9e460b72917a4fe5adf9c9530c1c89c25eebc302e6ddb05	0x68476977382d9cb85d11775b79252ee7d2859738	0xa0b86991c6218b36c1d19d4a2e9eb0ce3606eb48	0	0xa9059cbb000000000000000000000000697ff2c602619c4acb3c44ac30849991390222240000000000000000000000000000000000000000000000000000000002faf080	16113063	0xde1d0650d403a8bd9354fbeef713d209b434293f46e4d18e2a970d564c0b0445
1352	0x4fa8217725b9bfa4701d83dce6c2b4db2ad5f773ff26189263cb428a7faa4126	0x8e1f9929d048d0426f736d05067fa3e4efad3f23	0xb6e1697c4440e4ff2bd0288590268901442c7878	0	0x	16113063	0xde1d0650d403a8bd9354fbeef713d209b434293f46e4d18e2a970d564c0b0445
1354	0xf5a1a59f8c62d35d87100c1888207d230f0b5b871e136933629f9fe527d66ae6	0xbe3fc39cbaa1ed9bfcdf1e284f101de77ea5203a	0xb3b662644f8d3138df63d2f43068ea621e2981f9	0	0x5eaa9ced83a7f3d48786ac2667503a61e8c415438ed2922eb86a2906e4ee66d9a2ce499200000000000000000000000000000000000000000000000000000000000000800000000000000000000000000000000000000000000000000000000000000bdc00000000000000000000000000000000000000000000000000000000000000c00000000000000000000000000000000000000000000000000000000000000020000000000000000000000000000000000000000000000044678c3a7c32e6c04100000…	16113063	0xde1d0650d403a8bd9354fbeef713d209b434293f46e4d18e2a970d564c0b0445
1357	0x89f5acd40fae699bf56b0c2e1ca76d0f46382913963b0b50ca85ebb0334288a6	0xdcff76ec0615ca94cfe5d8f2cda6377521436ac6	0xbebc44782c7db0a1a60cb6fe97d0b483032ff1c7	0	0x1a4d01d200000000000000000000000000000000000000000000000207aa1c8216a67bc70000000000000000000000000000000000000000000000000000000000000001000000000000000000000000000000000000000000000000000000000247dfe2	16113063	0xde1d0650d403a8bd9354fbeef713d209b434293f46e4d18e2a970d564c0b0445
1359	0x8e6200c5aa65295d90e93cebf4c8063654433b0b24ff950332ee2505e5f1914a	0x7149c8886f6d010f899c2daa27c240f5eb42793b	0x06450dee7fd2fb8e39061434babcfc05599a6fb8	0	0xa9059cbb000000000000000000000000e8e269bc6a0ab13d353ba122af06165d4673214000000000000000000000000000000000000000000001b21ab9018a80bd400000	16113063	0xde1d0650d403a8bd9354fbeef713d209b434293f46e4d18e2a970d564c0b0445
1360	0xb0cd5bfe1164c8af68c52fd1e96f4846257a5d9a0d5313f5908740ba1bc90ec8	0xf6761d837aa2a5e3121feda27563bb64359e492f	0x000000000000ad05ccc4f10045630fb830b95127	0	0xf4acd7400000000000000000000000000000000000000000000000000000000000000020000000000000000000000000f6761d837aa2a5e3121feda27563bb64359e492f000000000000000000000000000000000000000000000000000000000000000100000000000000000000000000000000006411739da1c40b106f8511de5d1fac0000000000000000000000002c89a52a7156a3fb0bf416d5231b68748e4c283c000000000000000000000000000000000000000000000000000000000000043f00000…	16113063	0xde1d0650d403a8bd9354fbeef713d209b434293f46e4d18e2a970d564c0b0445
1361	0xd381ae73913c0075a4c23bd7ed0942678bfff0ff3455e9502f9f2cd46ba2ebe5	0x3e92b6cd7f76b8f1b9821d55321433450272d7ad	0x007933790a4f00000099e9001629d9fe7775b800	85830	0x70000000000107c225fd6490828bd87be38279a36f029f3b9af8b4e14b49120a3879da835a5af037bb2d1456bebd6b54d4ba	16113063	0xde1d0650d403a8bd9354fbeef713d209b434293f46e4d18e2a970d564c0b0445
1362	0xa67f55c42d2357fc97c151cc1e31b50ab9a9e652cb0e27740d87fa3bc54f82b3	0xa2164514f8e2d9c5f6662bd96a76c90164bf8bc5	0xcda72070e455bb31c7690a170224ce43623d0b6f	0	0x4ce6931a000000000000000000000000086e82d7e2beac68e451f59623777c61bc4c0ebc00000000000000000000000000000000000000000000000000000000000000010000000000000000000000000000000000000000000000000214e8348c4f0000	16113063	0xde1d0650d403a8bd9354fbeef713d209b434293f46e4d18e2a970d564c0b0445
1363	0x4ef57b0b354ed9f213a427ffe436c204bff0ceb2fc45d6a05883796053265f08	0x43851c57031662f2799be99c46b37bbd0e7df244	0x36ab1c395b3711d3d5ed2af8ac8371cc991aa06c	9.62e+17	0x9a2b81150000000000000000000000000000000000000000000000000000000000000020000000000000000000000000000000000000000000000000000000000000000200000000000000000000000000000000000000000000000000000000000000400000000000000000000000000000000000000000000000000000000000000740000000000000000000000000000000000000000000000000000000000000000100000000000000000000000000000000000000000000000006c22beb759d800000000…	16113063	0xde1d0650d403a8bd9354fbeef713d209b434293f46e4d18e2a970d564c0b0445
1364	0x8a31c20742625c4af2a85eb8b8ae1d07b45ed213e604d68d2c6d4c89b9013c52	0xa9831d89c4067bf7518efbcb6351ef6dd0059f33	0xa0b86991c6218b36c1d19d4a2e9eb0ce3606eb48	0	0x23b872dd0000000000000000000000007b0d28ef3f099a03d20f2a7ba9fab9945db571a9000000000000000000000000753cde8121969121fdf62edd1102104c1d906ee70000000000000000000000000000000000000000000000000000000000000000	16113063	0xde1d0650d403a8bd9354fbeef713d209b434293f46e4d18e2a970d564c0b0445
1366	0x7af69f692e795e36ff409d2cdd1f2c4b55171a1cd2815c309b76ed1e1b88fd38	0xc36f427c53202a9759f774fa2451b6709d0f9719	0x477f885f6333317f5b2810ecc8afadc7d5b69dd2	0	0x42842e0e000000000000000000000000c36f427c53202a9759f774fa2451b6709d0f9719000000000000000000000000c6446e94ca88b80f16ac18a6edccb1129eebfcd200000000000000000000000000000000000000000000000000000000000020e6	16113063	0xde1d0650d403a8bd9354fbeef713d209b434293f46e4d18e2a970d564c0b0445
1367	0x3ba68ea28bd11a24f6bb22dcb28ceece12cab7c0c22f7f72b8c9b06b1084a8df	0xcad621da75a66c7a8f4ff86d30a2bf981bfc8fdd	0x6cf6a5fbbc96803d6c36b52c33e3ae0cc6bfb17d	1.88e+17	0x	16113063	0xde1d0650d403a8bd9354fbeef713d209b434293f46e4d18e2a970d564c0b0445
1370	0x84c6279a0058dc9830410d6b853c96df5703e069ca7a0ab71c2538719ccaa705	0x8b459ea409acc33915005a540186e8ec1020f6e1	0xeeeec6476073778077b40a73fe32e23a9876cab4	7.94e+16	0x2b66d72e000000000000000000000000000000000000000000000000000000000000002000000000000000000000000000000000000000000000000000000000000000ea65794a68624763694f694a46557a49314e694973496d74705a434936496a64684e6a526c5a6d51314c544a694e4463744e475a6a5a6931684f4463784c5445785a6d59354f5451345954646a4f434a392e436751784d6a553545674e56553051614a444d77595455785954426b4c544530593255744e474e6a4f5330354e4749334c5…	16113063	0xde1d0650d403a8bd9354fbeef713d209b434293f46e4d18e2a970d564c0b0445
1371	0xe498a3fc0bda70a0a9e65d5844c04f99f64bbd4097b044552ca7c348edbfc8a0	0xf16e9b0d03470827a95cdfd0cb8a8a3b46969b91	0xd3e4ba569045546d09cf021ecc5dfe42b1d7f6e4	0	0xa9059cbb00000000000000000000000048cd540de98f607eaa57b24b45fae276e46c4766000000000000000000000000000000000000000000000008e981101f80c94000	16113063	0xde1d0650d403a8bd9354fbeef713d209b434293f46e4d18e2a970d564c0b0445
1373	0xd40a167bb1c57a6f1be4b5244d4335e3a0f5dc8177e4fda8e7015acdf83b95ee	0xba0d97e0377924ca96594c373806994c73fe5591	0x1111111254eeb25477b68fb85ed929f73a960582	0	0x12aa3caf00000000000000000000000053222470cdcfb8081c0e3a50fd106f0d69e63f20000000000000000000000000172401c05a6f9d569d731f747d3bfd66b1c68e54000000000000000000000000eeeeeeeeeeeeeeeeeeeeeeeeeeeeeeeeeeeeeeee0000000000000000000000009b5e338d5c3b5735a8fc497d0bbbe9f8d3d0e3d8000000000000000000000000ba0d97e0377924ca96594c373806994c73fe5591000000000000000000000000000000000000000000002a5a058fc295ed00000000000…	16113063	0xde1d0650d403a8bd9354fbeef713d209b434293f46e4d18e2a970d564c0b0445
1374	0xe2ed8aa51eb2b05c2cf764e5fcdfe3a43e330076cf96e13fed42159ac7c5306f	0x590d6870a083582ffa5b6dd652934b64700f25c0	0x1111111254eeb25477b68fb85ed929f73a960582	0	0x0502b1c5000000000000000000000000c02aaa39b223fe8d0a0e5c4f27ead9083c756cc20000000000000000000000000000000000000000000000004563918244f400000000000000000000000000000000000000000000000004c17bc8c1b799fba1400000000000000000000000000000000000000000000000000000000000000080000000000000000000000000000000000000000000000000000000000000000180000000000000003b6d034026e6a391953169d141df36834acfd9c61d3d4d59e26b9…	16113063	0xde1d0650d403a8bd9354fbeef713d209b434293f46e4d18e2a970d564c0b0445
1379	0x1b9acb6f9ab350482235c644f474c37184c0ae6936c45876f9db69beeec100fd	0x83cc754dda833a93f1c7d4e1566b4785c27522d4	0x806071b04b5d8296edab52b628d76e18c40cc8e7	4.04e+16	0x	16113063	0xde1d0650d403a8bd9354fbeef713d209b434293f46e4d18e2a970d564c0b0445
1380	0xfe36bee5939c2ea7e8ba14b513a07aed22cdfa5e3c57b409a78e6d422184e28e	0x1be210e7990eff6c07cb8cadcb9d077063ac3614	0xd89b9411d75faead41c60e1e53512ab08d9811eb	2100000000000000	0x	16113063	0xde1d0650d403a8bd9354fbeef713d209b434293f46e4d18e2a970d564c0b0445
1381	0x04310a2a6806156e75b02bafc1af046b82ebdc5efc07cbfe89c7715c2b2c636e	0xc39bdf685f289b1f261ee9b0b1b2bf9eae4c1980	0xdf9770e840dbce6ef9b59d7fa4e2d82241b3fc72	5.9e+17	0x	16113063	0xde1d0650d403a8bd9354fbeef713d209b434293f46e4d18e2a970d564c0b0445
1382	0xf705634a4339782f3a109f951ba21bcb5f4f2d40e9740b8529c721d394f77e2a	0x6706779890f5ab8301600b9cbd62ec90b7765326	0x7492e30d60d96c58ed0f0dc2fe536098c620c4c0	0	0xefef39a10000000000000000000000000000000000000000000000000000000000000001	16113063	0xde1d0650d403a8bd9354fbeef713d209b434293f46e4d18e2a970d564c0b0445
1383	0x2ef9f7f2d3bf0feab600d0ebac6658b2834f34f0c28cef4517dbef44733a5acd	0x9482467c285fbc7c1c74f191aeeedd7133ba0b92	0xdac17f958d2ee523a2206206994597c13d831ec7	0	0xa9059cbb0000000000000000000000008de4459db1e55443f4a7776f55fce6c5c99e1ce10000000000000000000000000000000000000000000000000000000000000000	16113063	0xde1d0650d403a8bd9354fbeef713d209b434293f46e4d18e2a970d564c0b0445
1385	0x826e8e2c7a8511aed361f43db400e4c511c06d66e1bab7870c8d9d0fef7b98a4	0x4976a4a02f38326660d17bf34b431dc6e2eb2327	0x1c04c2a1766bc72fe53b180fe206e6dc9d42f3db	3.56e+17	0x	16113063	0xde1d0650d403a8bd9354fbeef713d209b434293f46e4d18e2a970d564c0b0445
1386	0x2f0bba54d9ff78ca6540ef4cb840b365a93226791b18e4ba1c91b5350274ba52	0xe2ed0e9ce0794206c549f8c9fb246977e80f0f4b	0xf61f24c2d93bf2de187546b14425bf631f28d6dc	0	0xa22cb465000000000000000000000000f849de01b080adc3a814fabe1e2087475cf2e3540000000000000000000000000000000000000000000000000000000000000001	16113063	0xde1d0650d403a8bd9354fbeef713d209b434293f46e4d18e2a970d564c0b0445
1387	0x5a163bb2164b60fb03ecfd1163eb13b1ae846de85da6a48a4a0a5ce0d0c7744e	0x4d02fa8431c858169b5bbf8245df6fefb1e66395	0x0da920b49477f7d02a1da63a198fc877f65a40c4	0	0xbcd1c1e50000000000000000000000000000000000000000000000000000000000000000000000000000000000000000000000000000000000000000000000000000004000000000000000000000000000000000000000000000000000000000000000010000000000000000000000000000000000000000000000000000000000001451	16113063	0xde1d0650d403a8bd9354fbeef713d209b434293f46e4d18e2a970d564c0b0445
1389	0x0e2f6c50abc58cfc553de8fd52d72c3acbc11f7fc81b2c36b1a560fecf4fc0b5	0x4aa9c2562f57e459e7c707a7e76147e30dd58607	0x0b5365167908035b63041da975bd21e2a881aec1	0	0x095ea7b300000000000000000000000068b3465833fb72a70ecdf485e0e4c7bd8665fc45ffffffffffffffffffffffffffffffffffffffffffffffffffffffffffffffff	16113063	0xde1d0650d403a8bd9354fbeef713d209b434293f46e4d18e2a970d564c0b0445
1390	0xc98097966c47bed21aff8197f24a835068e8fd48e4fdcefd1cb829c4e9465585	0x41292bd9e6d86d03a37b9a3380445bdbd0be057f	0x00000000006c3852cbef3e08e8df289169ede581	3.3e+16	0xfb0f3ee1000000000000000000000000000000000000000000000000000000000000002000000000000000000000000000000000000000000000000000000000000000000000000000000000000000000000000000000000000000000000000000000000000000000000000000000000000000000000000000000000006c725365c4d0000000000000000000000000008ee364e05b5a851e531934450462c65ed6653332000000000000000000000000004c00500000ad104d7dbd00e3ae0a5c00560c0000000…	16113063	0xde1d0650d403a8bd9354fbeef713d209b434293f46e4d18e2a970d564c0b0445
1391	0x8d2728fb2b50871beee14424b6160ae900c57aac14d021f6da010d9005cf04aa	0xc3e2fa491f1f2a36407f5ef3561b4bbc7851ef80	0x68b3465833fb72a70ecdf485e0e4c7bd8665fc45	0	0x5ae401dc00000000000000000000000000000000000000000000000000000000638ce5a7000000000000000000000000000000000000000000000000000000000000004000000000000000000000000000000000000000000000000000000000000000020000000000000000000000000000000000000000000000000000000000000040000000000000000000000000000000000000000000000000000000000000016000000000000000000000000000000000000000000000000000000000000000e4472b4…	16113063	0xde1d0650d403a8bd9354fbeef713d209b434293f46e4d18e2a970d564c0b0445
1392	0x98000789e2fbadf4e1074702a497271a077d5145265dfad495997bb2d00e05b4	0x673eca746bc792addd1fe7a69b79651ea641a6b7	0x646ad943c389818dea949c9ccfe34168248d4131	2000000000000000	0x	16113063	0xde1d0650d403a8bd9354fbeef713d209b434293f46e4d18e2a970d564c0b0445
1393	0x5570a5c26d3d13dca92c866181516fa88c0dbf2829b17b0d0dddc7c257cd118f	0x1be210e7990eff6c07cb8cadcb9d077063ac3614	0x667f97f28aef68ad27be1e5ddb2ec180b8ebc7a3	2100000000000000	0x	16113063	0xde1d0650d403a8bd9354fbeef713d209b434293f46e4d18e2a970d564c0b0445
1395	0xb2d1a066015bddb341edbf120a8282b6e8c839e8bb41bce8ad5cf89d993dafe5	0x87704a8cecbbf36f3d2f785ef953ed9affc82b65	0xa0b86991c6218b36c1d19d4a2e9eb0ce3606eb48	0	0x095ea7b3000000000000000000000000ba12222222228d8ba445958a75a0704d566bf2c8ffffffffffffffffffffffffffffffffffffffffffffffffffffffffffffffff	16113063	0xde1d0650d403a8bd9354fbeef713d209b434293f46e4d18e2a970d564c0b0445
1398	0xd1e39dc9e3bebe93c29a24bb0e3339ad0376d47a4290df588c49978cdc6183c5	0x9696f59e4d72e237be84ffd425dcad154bf96976	0xdac17f958d2ee523a2206206994597c13d831ec7	0	0xa9059cbb000000000000000000000000f8e871f8e50a307ee50348fddedc1ccd388feefe0000000000000000000000000000000000000000000000000000000077234480	16113063	0xde1d0650d403a8bd9354fbeef713d209b434293f46e4d18e2a970d564c0b0445
1399	0xad7d55a31f10f9182e8a1255b49ef46af147cfd25ba95a7002f0f1ed8b160e3c	0x5f10ababd5bea3a40125f034710a35bf1842cb70	0xf629cbd94d3791c9250152bd8dfbdf380e2a3b9c	0	0x095ea7b30000000000000000000000001dd0c7cbf5b420648fe37edcdc64cbe30842e3b2000000000000000000000000000000000000000000a56fa5b99019a5c8000000	16113063	0xde1d0650d403a8bd9354fbeef713d209b434293f46e4d18e2a970d564c0b0445
1404	0x83c32c6e14b11c212d844eb1633f6198994a8027db0c2ff482fa21642cafd325	0xa1b3bb6bae2cea303ff9f209f8f062b999b18d99	0x0e34dbf47d8a80231ba483b005e70966b79073dc	8810000000000000	0x	16113063	0xde1d0650d403a8bd9354fbeef713d209b434293f46e4d18e2a970d564c0b0445
1406	0xdddf264e0dcd6327ae10ef5fadb786f5f612441f171f49d15a60432aad8e5a52	0xa097004e8bc5b0e35b6eb9e081f9b57a95ed6e74	0x52de8d3febd3a06d3c627f59d56e6892b80dcf12	2.37e+17	0xb6b4af05000000000000000000000000000000000000000000000000034a7bc12cbf2000000000000000000000000000000000000000000000000000000000031776988400000000000000000000000000000000000000000000000000000000638ce6f2e5667f85ebf6e96e3873a0e424b035d767e605536d0b28c70e5ece7e177c482bad1239e103031477a32cacb6d560ba9c81f67d58fc46e65d52d670c11642d7b0000000000000000000000000000000000000000000000000000000000000001bbf1f9…	16113063	0xde1d0650d403a8bd9354fbeef713d209b434293f46e4d18e2a970d564c0b0445
1407	0x9a230d07010cc82ae550892bf4a66f7d35a047175b07c669d04c04b2c862c57e	0xa74cac9bc2c9ed719a003503e3949d2cd12b408b	0x06450dee7fd2fb8e39061434babcfc05599a6fb8	0	0x9ff054df00000000000000000000000000000000000000000000000000000000000000ca	16113063	0xde1d0650d403a8bd9354fbeef713d209b434293f46e4d18e2a970d564c0b0445
1408	0x7af693e88285cf2ae991bf97cf5e4f3f52f5920d12064cae8b57434cf9384db8	0x952929a9551718dbd669cf3a9c05d98f466abd83	0xc02aaa39b223fe8d0a0e5c4f27ead9083c756cc2	0	0x2e1a7d4d00000000000000000000000000000000000000000000000122fa32c978591b31	16113063	0xde1d0650d403a8bd9354fbeef713d209b434293f46e4d18e2a970d564c0b0445
1409	0x38945d8f4dbd25a5b15c9fc618f67729a36c6cd98a62275bdd428ae8e6340e5e	0x2bc2bad21594c5d0ffdb9e36e9931bbe382b447c	0xf4565dcb2b18ac03714743608f8b7d834e520f1d	0	0x095ea7b30000000000000000000000007a250d5630b4cf539739df2c5dacb4c659f2488dffffffffffffffffffffffffffffffffffffffffffffffffffffffffffffffff	16113063	0xde1d0650d403a8bd9354fbeef713d209b434293f46e4d18e2a970d564c0b0445
1411	0x69e4f9e7959dc0940af15b1c3fc1a899e5596fd728d3e7aa3c140eddabc820ed	0x64f79922ebd1d5f265e8d0e9da4e9add599da005	0x00000000006c3852cbef3e08e8df289169ede581	2.64e+17	0xed98a57400000000000000000000000000000000000000000000000000000000000000a00000000000000000000000000000000000000000000000000000000000001ba00000000000000000000000000000000000000000000000000000000000001e400000007b02230091a7ed01230072f7006a004d60a8d4e71d599b8104250f00000000000000000000000000000000000000000000000000000000000000000005000000000000000000000000000000000000000000000000000000000000000500000…	16113063	0xde1d0650d403a8bd9354fbeef713d209b434293f46e4d18e2a970d564c0b0445
1412	0xa0b285b4e929cc8dd94a9d79507d076c7b665c722278ef6d1d37d4ab72a726f0	0x1be210e7990eff6c07cb8cadcb9d077063ac3614	0x72962b3df147f54985152136dd357dea4f7add9c	2100000000000000	0x	16113063	0xde1d0650d403a8bd9354fbeef713d209b434293f46e4d18e2a970d564c0b0445
1413	0x410655da1463d7e96385f182c1f5a21c27561b07bdf1d351a77c455d4f7593b8	0x46237e3bd21b7b33da4eef98995e182b2c09c389	0x3b517706b1a382c07720374401e6c9b70b3b4fda	0	0xa9059cbb000000000000000000000000633e3755d29c2832e46358a0eec30f169bdbe55600000000000000000000000000000000000000000000003635c9adc5dea00000	16113063	0xde1d0650d403a8bd9354fbeef713d209b434293f46e4d18e2a970d564c0b0445
1414	0x65621bf91e8f21f4cfb4ead6ab56b90a84176a6cd83de62ebe104fb43b6c2159	0x3b794929566e3ba0f25e4263e1987828b5c87161	0x6bf15efd871715b6b179e673c3e6246557928f9d	2.29e+17	0x	16113063	0xde1d0650d403a8bd9354fbeef713d209b434293f46e4d18e2a970d564c0b0445
1416	0x808589aeee08474c504abdf5c4d08d343705c5da35cdf75f7266cab822b4d33a	0x21a31ee1afc51d94c2efccaa2092ad1028285549	0x18aaa7115705e8be94bffebde57af9bfc265b998	0	0xa9059cbb000000000000000000000000d40f385d467f6126e151a46338c6a557347fbe6400000000000000000000000000000000000000000000152c09909a634a834000	16113063	0xde1d0650d403a8bd9354fbeef713d209b434293f46e4d18e2a970d564c0b0445
1417	0x77b0ece7ffd488244e5f21cd3af4f394b1bf0da06b2248eb3ad31c0da56e2a95	0x56eddb7aa87536c09ccc2793473599fd21a8b17f	0xdac17f958d2ee523a2206206994597c13d831ec7	0	0xa9059cbb000000000000000000000000d97eeb8b7f164cbbe9cb45c83c98d4e0bf502a4f0000000000000000000000000000000000000000000000000000000df8168400	16113063	0xde1d0650d403a8bd9354fbeef713d209b434293f46e4d18e2a970d564c0b0445
1418	0x3f00771b9def183fa048111aa855338c5ea23f66aa49ff31b265b1a6a6297b1a	0xeefd474e80b6caea43f212d964409c473684e3fe	0x2a5c2568b10a0e826bfa892cf21ba7218310180b	0	0x316182a30000000000000000000000007d1afa7b718fb893db30a3abc0cfc608aacfebb00000000000000000000000000000000000000000000000069738446638247cfe000000000000000000000000424706eec0568bbf3eef5bb7e3bf819cc884cb0800000000000000000000000000000000000000000000000000000000000000e000000000000000000000000000000000000000ae4dcedc2f8663e66588e98b3a000000000000000000000000000000000000000000000000000000000000008900000…	16113063	0xde1d0650d403a8bd9354fbeef713d209b434293f46e4d18e2a970d564c0b0445
1419	0x654c71f4e1ce317f303f0fb9996aca30645734c7c70bfc7bf131daee316d868a	0x14c4017f81675f7ac1321218d4a385a2d3117328	0xdac17f958d2ee523a2206206994597c13d831ec7	0	0xa9059cbb000000000000000000000000fdcf09b85e441e41c4f0068d0bde125de9b5b007000000000000000000000000000000000000000000000000000000006d011ef0	16113063	0xde1d0650d403a8bd9354fbeef713d209b434293f46e4d18e2a970d564c0b0445
1420	0x31d0a02ab6218a760186b24440b3f12aafae068dc22e0b94ca012fc041369655	0x89b8ddbe0b70a6cf3fe0a08b9a887fab0dfffb2a	0xa0b86991c6218b36c1d19d4a2e9eb0ce3606eb48	0	0x095ea7b30000000000000000000000007a250d5630b4cf539739df2c5dacb4c659f2488dffffffffffffffffffffffffffffffffffffffffffffffffffffffffffffffff	16113063	0xde1d0650d403a8bd9354fbeef713d209b434293f46e4d18e2a970d564c0b0445
1422	0x8313fd4f180171b3fe56407ed5cef9d6d45b982fec254c3c41908a865843cb70	0xf5491f793d47a6ea22f5e0b9ad3990cf66c4b40b	0xdac17f958d2ee523a2206206994597c13d831ec7	0	0xa9059cbb0000000000000000000000007d7b453a8bd52eb35008a358656201c2144234b9000000000000000000000000000000000000000000000000000000000e01d0c0	16113063	0xde1d0650d403a8bd9354fbeef713d209b434293f46e4d18e2a970d564c0b0445
1424	0x4cc6d0643c80e8df0cc945fdca9d0c780ffd919a4feca3138b5b0813fd54cef5	0x5438f076431321224969fc258d1c99d340b8af5a	0xc02aaa39b223fe8d0a0e5c4f27ead9083c756cc2	0	0x2e1a7d4d00000000000000000000000000000000000000000000000007492cb7eb148000	16113063	0xde1d0650d403a8bd9354fbeef713d209b434293f46e4d18e2a970d564c0b0445
1425	0xb80fc6233662b276bcd8c5c6810ea79f6a7dbd4208ea93ce45645c17a7e946a7	0x07a6287facbeae3ab55cad0ada9bb46700131d4b	0xf048cbaad26c1a35e7a04e126fdeb9c8045e676b	0	0x095ea7b30000000000000000000000009ade9ea6fd4fca08e27db8d2b607e3e30bcb0ab20000000000000000000000000000000000000000000000000000000000001d43	16113063	0xde1d0650d403a8bd9354fbeef713d209b434293f46e4d18e2a970d564c0b0445
1428	0x30adb4f77d610e5802e0930eab0e05338e82f33087b5869a7aab7c272714c220	0xa2e1aa5f8f9f04718a910404efef3d68399efa4d	0xdac17f958d2ee523a2206206994597c13d831ec7	0	0xa9059cbb000000000000000000000000f00a6202502fc8599862f1e83505064a17b497040000000000000000000000000000000000000000000000000000000d71a1bd40	16113063	0xde1d0650d403a8bd9354fbeef713d209b434293f46e4d18e2a970d564c0b0445
1429	0xaba8e1c5f57651daba89506d273f07ed9edce552e56efb1e409433f1a4074215	0x28c6c06298d514db089934071355e5743bf21d60	0x7420b4b9a0110cdc71fb720908340c03f9bc03ec	0	0xa9059cbb00000000000000000000000036f1004deb93e61053e11dc55843d29c13652dca0000000000000000000000000000000000000000000219e0550b1f9fe5a40000	16113063	0xde1d0650d403a8bd9354fbeef713d209b434293f46e4d18e2a970d564c0b0445
1430	0x22f710fca6c9531aeddce4d353997280e719b2fab8ab95e05d0c347355b02f5c	0x1be210e7990eff6c07cb8cadcb9d077063ac3614	0x5c19e8649a074da0f9be3199dabb488700814be7	2100000000000000	0x	16113063	0xde1d0650d403a8bd9354fbeef713d209b434293f46e4d18e2a970d564c0b0445
1431	0xe3f89460ba8963f6da4c281e455a7af5ac48f49dd0b4357a3396776dbf009307	0x1d1543e40353515392491be333f6b66cf72def90	0xf4565dcb2b18ac03714743608f8b7d834e520f1d	0	0x095ea7b30000000000000000000000007a250d5630b4cf539739df2c5dacb4c659f2488dffffffffffffffffffffffffffffffffffffffffffffffffffffffffffffffff	16113063	0xde1d0650d403a8bd9354fbeef713d209b434293f46e4d18e2a970d564c0b0445
1436	0xa955b69720822dfe8ed5cbc29ca170de44d3645117410165aa985639dad324c3	0x19f494583c7c933be7b0ee58104ddafac1e8adfa	0xdbd324b73f6f85bf9013b75c442021303b635ff9	700000000000000	0xa9059cbb0000000000000000000000004b8949e12872c9063fbea91c947ab122c03b0b1d00000000000000000000000000000000f9b44ab4c3a5723df12f712950860be4	16113063	0xde1d0650d403a8bd9354fbeef713d209b434293f46e4d18e2a970d564c0b0445
1437	0xde5581e911e23322ff367b76990f8432a39c0ce90a511fcd507e8e19f1b448a2	0x9a0abcd57493935a1fd880b157a0f9784471ba89	0xeeeec6476073778077b40a73fe32e23a9876cab4	7.94e+16	0x2b66d72e000000000000000000000000000000000000000000000000000000000000002000000000000000000000000000000000000000000000000000000000000000ea65794a68624763694f694a46557a49314e694973496d74705a434936496a64684e6a526c5a6d51314c544a694e4463744e475a6a5a6931684f4463784c5445785a6d59354f5451345954646a4f434a392e436751784d6a553545674e56553051614a4745794d5455334d574e684c54526a4e444d744e4445334f4331695954637a4c5…	16113063	0xde1d0650d403a8bd9354fbeef713d209b434293f46e4d18e2a970d564c0b0445
1438	0x0f231a0bb124a40e60316a8c57edf9ab42492272a7cee65b900328778943ad11	0x18ab6fac9bff025d02392b95599dc4ac3746ede7	0x37cd4e8875e3edaffdfe9be63958f07effbd0bfd	0	0x095ea7b30000000000000000000000001111111254eeb25477b68fb85ed929f73a960582ffffffffffffffffffffffffffffffffffffffffffffffffffffffffffffffff	16113063	0xde1d0650d403a8bd9354fbeef713d209b434293f46e4d18e2a970d564c0b0445
1442	0x6ebb7980da674cbb7ab78e12f51f2977f77659a9bc495cc3c92be7652eb405b7	0x3ad8679bb076b91f3c9309ce7d5bd2c2d0e74de6	0xb64a8b4958b0b6ed34bac93de8d927ac7c67a8c1	2.77e+16	0x	16113063	0xde1d0650d403a8bd9354fbeef713d209b434293f46e4d18e2a970d564c0b0445
1443	0xafe28a912e40268422f3bac3102facb976be14f563ad051c0b04d0558e80494e	0x8216874887415e2650d12d53ff53516f04a74fd7	0x5256455dd285e3337aaa7694798362cd4c2e78ce	9.7e+16	0x	16113063	0xde1d0650d403a8bd9354fbeef713d209b434293f46e4d18e2a970d564c0b0445
1445	0xe6413ad71fdceb98184e773b55697d06d71842b22fd9b7a748e4e650d5a74d8e	0xdfd5293d8e347dfe59e90efd55b2956a1343963d	0x10486a239e734aa212f409f1854ca053c4fed982	1.39e+18	0x	16113063	0xde1d0650d403a8bd9354fbeef713d209b434293f46e4d18e2a970d564c0b0445
1446	0x53c04645980a197fa9cb8f7a4a8f9681c24ad16303bebbd7e24f1b938e3ae797	0x5bdf85216ec1e38d6458c870992a69e38e03f7ef	0x4086e77c5e993fdb90a406285d00111a974f877a	0	0xa9059cbb0000000000000000000000003b3c632df85e98185291270baa02ae1b76662a20000000000000000000000000000000000000000000000000000000003d29b2b4	16113063	0xde1d0650d403a8bd9354fbeef713d209b434293f46e4d18e2a970d564c0b0445
1447	0x795f0fae15c84290e21e4d74f426a8fa837acebb6f31e1db6049dffe37164f84	0x96f235b899fe1f149c139394a6cddb0666d2ae33	0x701a038af4bd0fc9b69a829ddcb2f61185a49568	0	0xa22cb4650000000000000000000000001e0049783f008a0085193e00003d00cd54003c710000000000000000000000000000000000000000000000000000000000000001	16113063	0xde1d0650d403a8bd9354fbeef713d209b434293f46e4d18e2a970d564c0b0445
1448	0x54c73bf48f64f0a717cbd7fd25604d4993713ac500db40287b5b32c9b5002743	0x1be210e7990eff6c07cb8cadcb9d077063ac3614	0x79a8300e9a6b667311fffd0af9c00582544ea2bc	2100000000000000	0x	16113063	0xde1d0650d403a8bd9354fbeef713d209b434293f46e4d18e2a970d564c0b0445
1451	0xfd5d28de40359af303f6e42381de207fe0b822bcaf621fb861aefeae15afe3af	0xdafea492d9c6733ae3d56b7ed1adb60692c98bc5	0xebec795c9c8bbd61ffc14a6662944748f299cacf	5.79e+16	0x	16113063	0xde1d0650d403a8bd9354fbeef713d209b434293f46e4d18e2a970d564c0b0445
1453	0xee610d210148ea509e1cea5c8a70c165cdda940c1768edbce6a5b018c0e462a9	0x7999b053c3e848e26ec8d75a8d761a9cb023f711	0x8f187937b68c21acb5ffbfabced521e627a57f65	0	0x2b83b0f300000000000000000000000000000000000000000000000000000000000000a000000000000000000000000000000000000000000000000000000000000001a000000000000000000000000000000000000000000000000000000000000002a000000000000000000000000000000000000000000000000000000000000003a000000000000000000000000000000000000000000000000000000000000011c0000000000000000000000000000000000000000000000000000000000000000700000…	16113063	0xde1d0650d403a8bd9354fbeef713d209b434293f46e4d18e2a970d564c0b0445
1454	0xa63cad3f713cf11026f3c526ec272c8a2438b7236f7d7c48b4e08002bf456768	0x0b3ede005f36e07ce27b453c0e832b66b3871ff0	0xeb828447bfa75eee35f8d59aca4600a922e17e93	0	0x751039fc	16113063	0xde1d0650d403a8bd9354fbeef713d209b434293f46e4d18e2a970d564c0b0445
1455	0x8548cebde196bb3edbbe5adb2f7be80158cd42382b2d9dfa750c9fac6274ffc6	0x1be210e7990eff6c07cb8cadcb9d077063ac3614	0x47a5cb705c9b586e20651623978d7ea5ea3e516b	2100000000000000	0x	16113063	0xde1d0650d403a8bd9354fbeef713d209b434293f46e4d18e2a970d564c0b0445
1456	0x39852e1cd1fafedfa951e52fa1c133f17f09ecfa2ef9a237c4b4aa43450693ee	0x312238ecf6b8ec69645912a5d67bcefc7a9a82f5	0x9ade9ea6fd4fca08e27db8d2b607e3e30bcb0ab2	0	0x1b9115470000000000000000000000000000000000000000000000000000000000001d49	16113063	0xde1d0650d403a8bd9354fbeef713d209b434293f46e4d18e2a970d564c0b0445
1458	0xcd662c5e4d4d8299d66987032801f8797061052dc06d7e4804501181e4419a9f	0xd1faf168a2e25c2bf15f856453e457f2f3c216ff	0x062328f1eeb8fa3efcee3ee01b6dc23dd5e6c4d3	2000000000000000	0x	16113063	0xde1d0650d403a8bd9354fbeef713d209b434293f46e4d18e2a970d564c0b0445
1461	0x586579b88da53be05eaa55465f1efa2b88e727e003f9bbe1aebc872c6a5b4bc2	0x562680a4dc50ed2f14d75bf31f494cfe0b8d10a1	0x6adb2e268de2aa1abf6578e4a8119b960e02928f	0	0xa9059cbb0000000000000000000000009ae6188afc99e14f54e65459bb2ba6f2a223ca0000000000000000000000000000000000000000000332a1ed5c9bc6cc29400000	16113063	0xde1d0650d403a8bd9354fbeef713d209b434293f46e4d18e2a970d564c0b0445
1462	0x3b49fc8181a198899c3690d50ccdff6159bc7ec8fa0a174b1ce13c7412ed13f5	0x7ca4926b101a71eb6eae564534d9eda2278b4bd9	0xc143bbfcdbdbed6d454803804752a064a622c1f3	0	0x42842e0e0000000000000000000000007ca4926b101a71eb6eae564534d9eda2278b4bd9000000000000000000000000a018993774fac9df421506000982b262ceec10540000000000000000000000000000000000000000000000000000000000002b80360c6ebe	16113063	0xde1d0650d403a8bd9354fbeef713d209b434293f46e4d18e2a970d564c0b0445
1464	0xf4a783b0cf0f6e818a4a0d8247c1307f3680151a083f5943a2b4df8f211fb829	0x10121cb2b3f64f0a6231178336aca3e3b87d5ca5	0x049b51e531fd8f90da6d92ea83dc4125002f20ef	0	0xb31c01fb6be86d0e0056f69f0a59f5b4920a1ef743afc8302b29ceb394a6aea5f9cddc754d813df0a57343489cf69896f9afc30d6145d4097c94a7cd8d37da0d92463b61000000000000000000000000000000000000000000000000000000000000006000000000000000000000000000000000000000000000000000000000000000415f5d915b1742755e191713012795edca066b98b83b040517bf36d59a4f05ce5369e003ef8d67be7874a47dee75cbabcbeab4d2002e0b5ec4aa89bda360b75a951c000…	16113063	0xde1d0650d403a8bd9354fbeef713d209b434293f46e4d18e2a970d564c0b0445
1465	0x09e061419d0ea7f0ab3361f7bd0393b08835e626f3558e122288d7565671d848	0xd029e10428827e05bf265e4b052657c8e47c3248	0x2a7334c0361b33526f2793e808a4b79d0b87af20	0	0x0bd062460000000000000000000000000000000000000000000000000000000000000040000000000000000000000000000000000000000000000000000000000000000100000000000000000000000000000000000000000000000000000000000000010000000000000000000000000000000000000000000000000000000000000201	16113063	0xde1d0650d403a8bd9354fbeef713d209b434293f46e4d18e2a970d564c0b0445
1466	0xbcd5c084ab4a1bd92f0ea3438c4ef054b30d61042d307d3a10dc94e3c5847e86	0x1697d251211836c4a11f99f9408024886c5fc92c	0xda889ba7ca6b9a0425bebee23b4a99badf5ab57c	1.08e+17	0x	16113063	0xde1d0650d403a8bd9354fbeef713d209b434293f46e4d18e2a970d564c0b0445
1467	0xe9ad3d02e65b7136d2377453ba0fab1c77e82077371e4bbffb767d65591536eb	0x3feea8d80c68f9e08b60bc6f431bd6490e2ca7af	0xdac17f958d2ee523a2206206994597c13d831ec7	0	0x23b872dd000000000000000000000000ca009b539c78262194a531893d84c70f4d64340100000000000000000000000027783c1698a9f30dae0a8b6ac6ce0703d5b887010000000000000000000000000000000000000000000000000000000000000000	16113063	0xde1d0650d403a8bd9354fbeef713d209b434293f46e4d18e2a970d564c0b0445
1468	0xb38c490e5e22b04953132587b4a95ccfc98d1f15cb8a877238803031b55195b0	0x3e92b6cd7f76b8f1b9821d55321433450272d7ad	0x007933790a4f00000099e9001629d9fe7775b800	85543	0x6b000000000107c225fe6490828bd87be38279a36f029f3b9af8b4e14b49	16113063	0xde1d0650d403a8bd9354fbeef713d209b434293f46e4d18e2a970d564c0b0445
1472	0x3a3793505565c1796673c38ccf16ee08928d2a21fa92e56e1e4652a4e3885e64	0xf408bee3443d0397e2c1cde588fb060ac657006f	0x36c72892fcc72b52fa3b82ed3bb2a467d9079b9a	1.99e+16	0xc725e05400000000000000000000000081dc30d5cd4801fd3bd564dc7674cb1c6564a2450000000000000000000000000000000000000000000000000000000000001a8800000000000000000000000070685de040818c4e21ea2f080bce756115c15721000000000000000000000000000000000000000000000000000000000000000100000000000000000000000000000000006c3852cbef3e08e8df289169ede581000000000000000000000000000000000000000000000000000000000000000100000…	16113063	0xde1d0650d403a8bd9354fbeef713d209b434293f46e4d18e2a970d564c0b0445
1473	0xbf4fca117aea40f1b76a0b7638008d41619c53923419f4381154c921cd709e66	0x5f10ababd5bea3a40125f034710a35bf1842cb70	0x1dd0c7cbf5b420648fe37edcdc64cbe30842e3b2	0	0x9e2ac9fa00000000000000000000000000000000000000000000000000000000000000010000000000000000000000005f10ababd5bea3a40125f034710a35bf1842cb700000000000000000000000000000000000000000000000041fb2141f2d003800	16113063	0xde1d0650d403a8bd9354fbeef713d209b434293f46e4d18e2a970d564c0b0445
1474	0x36884f8e2b1eb5ce0bf442bb64926eeb15398ac789c8e6aff6b72c2c2284de30	0x0d785c33bce2d09e521bfc433efe42da53d3a898	0x20df77bb4ce1478e89a7461cace8dc016f9198e4	0	0xc9807539000000000000000000000000000000000000000000000000000000000000008000000000000000000000000000000000000000000000000000000000000003800000000000000000000000000000000000000000000000000000000000000480000100010001010000000000000000000000000000000000000000000000000000000000000000000000000000000000000000000000000000000000000002e00000000000000000000000a3e8fd8cfcedc8f52934173c2a27b57b00005262050e0c0…	16113063	0xde1d0650d403a8bd9354fbeef713d209b434293f46e4d18e2a970d564c0b0445
1476	0x9c14579ce9722034838729dd21d7479d7ab7a3f38e04541e30c966a544019033	0x58e31509f03efb95e99326ea4149fe482d71c2ba	0x68b3465833fb72a70ecdf485e0e4c7bd8665fc45	0	0x5ae401dc00000000000000000000000000000000000000000000000000000000638ce5bf00000000000000000000000000000000000000000000000000000000000000400000000000000000000000000000000000000000000000000000000000000001000000000000000000000000000000000000000000000000000000000000002000000000000000000000000000000000000000000000000000000000000000e404e45aaf000000000000000000000000dac17f958d2ee523a2206206994597c13d831…	16113063	0xde1d0650d403a8bd9354fbeef713d209b434293f46e4d18e2a970d564c0b0445
1477	0xe387c2c825bea188203e7d76ce8bde45a1d765467378c466f015080494eae40d	0xf3bac9e889eaa0eb58795c7c9b7c2ead40084784	0xb5400c4d5048af239820f083faa08ef4189d4b4c	2.41e+17	0x	16113063	0xde1d0650d403a8bd9354fbeef713d209b434293f46e4d18e2a970d564c0b0445
1479	0xc6576c44c97d9cd60367650cfcfcb31331200c7593cd65818a8fb9e56ece1436	0x7cab69934e9b42f7516cbda67d9e85bb802e0086	0x76f4eed9fe41262669d0250b2a97db79712ad855	0	0xf17a454600000000000000000000000000000000000000000000000000000000000000c000000000000000000000000000000000000000000000000000000000000001a00000000000000000000000000000000000000000000000000000000c67717cde0000000000000000000000000000000000000000000000000000000c644493040000000000000000000000001d64fb0ffa8362b2e1ee7ee03929159551eab26e000000000000000000000000000000000000000000000000000000000000022000000…	16113063	0xde1d0650d403a8bd9354fbeef713d209b434293f46e4d18e2a970d564c0b0445
1481	0x8ddd8225b0d501cc498b06827ef61739b755434b5f0aea1956c80afbb0914951	0xa4b181f13f6737850d43339fa4eb08d68bbdab1b	0x01f98e1b5cd0631780436bb0a6d717653b384545	1.19e+16	0x	16113063	0xde1d0650d403a8bd9354fbeef713d209b434293f46e4d18e2a970d564c0b0445
1483	0x7e0bf28a51a9a99ad655b5cbb491e4489c125144c219434b8ed3b88eafd13c9a	0x49a2dcc237a65cc1f412ed47e0594602f6141936	0xc36442b4a4522e871399cd717abdd847ab11fe88	1e+18	0xac9650d800000000000000000000000000000000000000000000000000000000000000200000000000000000000000000000000000000000000000000000000000000002000000000000000000000000000000000000000000000000000000000000004000000000000000000000000000000000000000000000000000000000000001e00000000000000000000000000000000000000000000000000000000000000164883164560000000000000000000000009d409a0a012cfba9b15f6d4b36ac57a46966a…	16113063	0xde1d0650d403a8bd9354fbeef713d209b434293f46e4d18e2a970d564c0b0445
1484	0x8f2b5829e8609a0fb434d4c5fd5cc32f224f5d4b497912a1669166c4699ea486	0x0b58c3e6d05f8311f44497296ef6753e8885a1c2	0xff1f2b4adb9df6fc8eafecdcbf96a2b351680455	3.53e+16	0x7ff48afb0000000000000000000000000000000000000000000000000000000000000000000000000000000000000000000000000000000000000000007d56f91bad00000000000000000000000000000b58c3e6d05f8311f44497296ef6753e8885a1c20000000000000000000000000000000000000000000000000000000000000000	16113063	0xde1d0650d403a8bd9354fbeef713d209b434293f46e4d18e2a970d564c0b0445
1485	0x0960b314da35c415d1d4372dd50a64cce3f948e31ebe571bfa0022dadcc7b9d1	0x0cad9b48982efce75ccc68f5b183d64083f1f9e2	0x8e8f404616c22d2a11ce61b9837e0cb53241fbcb	3000000000000000	0xa0712d680000000000000000000000000000000000000000000000000000000000000003	16113063	0xde1d0650d403a8bd9354fbeef713d209b434293f46e4d18e2a970d564c0b0445
1488	0x8a0e5b22c64689d0382cfe42d2f66e4236bf425a7e6df9876ad39ab6fd1147d3	0xb981bdb5b1de479cbc4986fc669235ee194a9070	0x3666f603cc164936c1b87e207f36beba4ac5f18a	0	0xdeace8f50000000000000000000000000000000000000000000000000000000000000089000000000000000000000000b981bdb5b1de479cbc4986fc669235ee194a90700000000000000000000000000000000000000000000000000000000017d784000000000000000000000000000000000000000000000000000000000017b9db9c0000000000000000000000000000000000000000000000000000000063961944000000000000000000000000a6a688f107851131f0e1dce493ebbebfaf99203e00000…	16113063	0xde1d0650d403a8bd9354fbeef713d209b434293f46e4d18e2a970d564c0b0445
1492	0xda47a16f6e1271680067126e4da87103f23b43f1e0614040652459c820f2b049	0x8715bb3c7ea3732a803c42e773c364488f853061	0x39da41747a83aee658334415666f3ef92dd0d541	1.76e+16	0x9a2b81150000000000000000000000000000000000000000000000000000000000000020000000000000000000000000000000000000000000000000000000000000000100000000000000000000000000000000000000000000000000000000000000200000000000000000000000000000000000000000000000000000000000000004000000000000000000000000000000000000000000000000003e871b540c0000000000000000000000000000000000000000000000000000000000000000006000000…	16113063	0xde1d0650d403a8bd9354fbeef713d209b434293f46e4d18e2a970d564c0b0445
1494	0x2d577c8c3273f4d06b29382409128b3b6457403571a263738666532ec438820b	0xbe00263b04dfddb37df887063dc9eeb44878eb10	0xabea9132b05a70803a4e85094fd0e1800777fbef	1.6e+16	0x2d2da806000000000000000000000000be00263b04dfddb37df887063dc9eeb44878eb10	16113063	0xde1d0650d403a8bd9354fbeef713d209b434293f46e4d18e2a970d564c0b0445
1495	0x3bcca693f6577c0b7f9fe9be7c714326ab0593d34868d0759d72e20f91a2e4a1	0x88d451d8a8246216003adc9eb1624e3a3c81f41b	0xff245636b1cc4a12fa77b4ca8e6438f87d3b793d	6.38e+17	0x	16113063	0xde1d0650d403a8bd9354fbeef713d209b434293f46e4d18e2a970d564c0b0445
1496	0xf6dffebf9e20b80574e6eebfd57fc6d32dc2dcf0408d361636fbce94552f40e2	0x1be210e7990eff6c07cb8cadcb9d077063ac3614	0x0b586d28c78954367dc8987295efd79b26dea24c	2100000000000000	0x	16113063	0xde1d0650d403a8bd9354fbeef713d209b434293f46e4d18e2a970d564c0b0445
1497	0xcf87c2d0caec93ae918e4507dc985a81efe451954576f42ad4b7bc227c04c608	0x28c6c06298d514db089934071355e5743bf21d60	0xf4c500cf7c00ded83f34665f6e81397096a62d79	1.02e+18	0x	16113063	0xde1d0650d403a8bd9354fbeef713d209b434293f46e4d18e2a970d564c0b0445
1499	0xc0852c0dcfaf371ff1fa86b9c6564da2143499cd2cf11e04767a4bfd01b53efd	0x219c36ef2110384fc7eb2a1953c34e31effbed8a	0x06012c8cf97bead5deae237070f9587f8e7a266d	0	0x4ad8c93800000000000000000000000000000000000000000000000000000000001ecd6f0000000000000000000000000000000000000000000000000018de76816d8000000000000000000000000000000000000000000000000000000e35fa931a0000000000000000000000000000000000000000000000000000000000000002a300	16113063	0xde1d0650d403a8bd9354fbeef713d209b434293f46e4d18e2a970d564c0b0445
1500	0x15e03f02a3c2691dc08da528106f62a5a9525edc5d8769395b1e9b835c41679b	0x9a81add75e89599ccd31e2129d6df5a0f1778f93	0x1111111254fb6c44bac0bed2854e76f90643097d	3.56e+16	0x2e95b6c80000000000000000000000000000000000000000000000000000000000000000000000000000000000000000000000000000000000000000007e80d76c3f372b00000000000000000000000000000000000000000000000000000000029d98470000000000000000000000000000000000000000000000000000000000000080000000000000000000000000000000000000000000000000000000000000000100000000000000003b6d03400d4a11d5eeaac28ec3f61d100daf4d40471f18520bd34…	16113063	0xde1d0650d403a8bd9354fbeef713d209b434293f46e4d18e2a970d564c0b0445
1501	0x70fbaa45ab39ec38a9308424fde9142f066df80ac5924e08a5dfe9c7fc6be339	0xe45963c5f1d7bcc7a1275150003b817b1eb98741	0x000000000000ad05ccc4f10045630fb830b95127	8800000000000000	0x9a1fc3a70000000000000000000000000000000000000000000000000000000000000040000000000000000000000000000000000000000000000000000000000000032000000000000000000000000000000000000000000000000000000000000000e0000000000000000000000000000000000000000000000000000000000000001c2f322763dd97816d19e5d7f4d063aa024a277952e91dd91f82541d1e6fb4a7b47504ceb53b3d6368be7c92cadb75b5b8d75ee271c071f1db2e7c6055673d53aa00000…	16113063	0xde1d0650d403a8bd9354fbeef713d209b434293f46e4d18e2a970d564c0b0445
1502	0x0462e8e1a163159b975615e5ea6ea0c46fb458d7142a8cb4df552b14913479e2	0x8cde74df83bf46c5d410f0938bc51ba54554b61f	0x9dc62b88862d7ff75a91e19a42e279f5c6211bf7	2000000000000000	0x	16113063	0xde1d0650d403a8bd9354fbeef713d209b434293f46e4d18e2a970d564c0b0445
1503	0x67ccdfe900d9c9ec3513b26468113bfabb5c8dc1a87cf4a5367bcbfcc9bf8fc8	0x4b63be54f31913c79a028e8866d9c7eced91002b	0x685a99eeb59a74cd9fd497a10ed3e8c519915890	0	0xcffb6e200000000000000000000000000000000000000000000000000000000000000001000000000000000000000000000000000000000000000000000000000000004000000000000000000000000000000000000000000000000000000000000000010000000000000000000000004b63be54f31913c79a028e8866d9c7eced91002b	16113063	0xde1d0650d403a8bd9354fbeef713d209b434293f46e4d18e2a970d564c0b0445
1507	0x75ac83132ee66e76226dc8d1f5f198ea08e2a1ddceb03f6c62879703ed722614	0xa1ab7a4aa264745912db261536291336f7e543ac	0x514910771af9ca656af840dff83e8264ecf986ca	0	0xa9059cbb0000000000000000000000001d4c00b7d0f22e3a6befb2250c2d45211df8d4ab0000000000000000000000000000000000000000000000004b8fc25adb852400	16113063	0xde1d0650d403a8bd9354fbeef713d209b434293f46e4d18e2a970d564c0b0445
1508	0x02d557624735f82ea9c9b906b3f6ffed8f036b1a4afc709ea4f7f4ecb4be1468	0xfd2024a46116d96a2f63d5f68c36b29ce30ec574	0x68b3465833fb72a70ecdf485e0e4c7bd8665fc45	1.62e+18	0x5ae401dc00000000000000000000000000000000000000000000000000000000638ce5bf000000000000000000000000000000000000000000000000000000000000004000000000000000000000000000000000000000000000000000000000000000020000000000000000000000000000000000000000000000000000000000000040000000000000000000000000000000000000000000000000000000000000016000000000000000000000000000000000000000000000000000000000000000e442712…	16113063	0xde1d0650d403a8bd9354fbeef713d209b434293f46e4d18e2a970d564c0b0445
1509	0x209ef1643943271c6c1cf171efe81d9e15cb023e554dfaf84a9fcc51a35eb4cb	0x242510fe96a4fa2d4ac7de68cd41944cd71d4099	0xd9e1ce17f2641f24ae83637ab66a2cca9c378b9f	0	0x38ed1739000000000000000000000000000000000000000000000000477879b6d14300000000000000000000000000000000000000000000000004e439dabff525ad79c200000000000000000000000000000000000000000000000000000000000000a0000000000000000000000000242510fe96a4fa2d4ac7de68cd41944cd71d409900000000000000000000000000000000000000000000000000000000638cdf47000000000000000000000000000000000000000000000000000000000000000200000…	16113063	0xde1d0650d403a8bd9354fbeef713d209b434293f46e4d18e2a970d564c0b0445
1511	0xa0ce90e4b1dd86783b727c37185e38b3952981cd139d1498b78651a231985d0a	0xcff80b516d8f47b2c54bbdcf108b2cddc5be5671	0x7492e30d60d96c58ed0f0dc2fe536098c620c4c0	0	0xa22cb4650000000000000000000000001e0049783f008a0085193e00003d00cd54003c710000000000000000000000000000000000000000000000000000000000000001	16113063	0xde1d0650d403a8bd9354fbeef713d209b434293f46e4d18e2a970d564c0b0445
1512	0xf7ac74b1c8e79dabb0f7dcb322375ab7ac1b76aa113aab4a936e76dada691dbf	0x34fcaea5f3d32965eaa083bf85a0025fe8098c21	0x00000000006c3852cbef3e08e8df289169ede581	0	0xfd9f1e1000000000000000000000000000000000000000000000000000000000000000200000000000000000000000000000000000000000000000000000000000000002000000000000000000000000000000000000000000000000000000000000004000000000000000000000000000000000000000000000000000000000000004c000000000000000000000000034fcaea5f3d32965eaa083bf85a0025fe8098c21000000000000000000000000004c00500000ad104d7dbd00e3ae0a5c00560c0000000…	16113063	0xde1d0650d403a8bd9354fbeef713d209b434293f46e4d18e2a970d564c0b0445
1513	0x279e9a68e81ed2b32f79603aa781fd556d26d1ecd464f1d44ce08e9ecea8e4e0	0x3596b5107b5058504a591022250bbe81bc565560	0x2b591e99afe9f32eaa6214f7b7629768c40eeb39	0	0xa9059cbb000000000000000000000000568fa66e56082189eae0cdf99f33d0280cfa47e300000000000000000000000000000000000000000000000000002a14122c69d0	16113063	0xde1d0650d403a8bd9354fbeef713d209b434293f46e4d18e2a970d564c0b0445
1516	0xa29f511be81828afb834aacdfd3df64dc3c20f6b227c310c7d0d3f13e5d59416	0x9d568587a24d3be098eeb2513d58f17a72f634d8	0x49642110b712c1fd7261bc074105e9e44676c68f	0	0x095ea7b300000000000000000000000068b3465833fb72a70ecdf485e0e4c7bd8665fc45ffffffffffffffffffffffffffffffffffffffffffffffffffffffffffffffff	16113063	0xde1d0650d403a8bd9354fbeef713d209b434293f46e4d18e2a970d564c0b0445
1518	0xd3afaa3891f90019853ff8155cb864d7239ced61461b46d0ebb1c49ebccf602c	0x6887246668a3b87f54deb3b94ba47a6f63f32985	0x5e4e65926ba27467555eb562121fac00d24e9dd2	0	0xd0f893440002b47cea0000940000060000000000000000000000000000000000001400000000638cdea60000f5dd7000002200000000638cdeb50000f5dd7000003500000000638cdeb50000f5dd7200002200000000638cdec40000f5dd7200000700000000638cdec40000f5dd73789cecfd775c544bf23f0e9f1972ce4940b22405048521232088241124e7a01848924160c848903408483a2a4114c912240928a0a02049408922390a4886e7b570f7fe6017662ed7bdd7fd7c9fadbf3853f4e9ea3e5dddd…
1519	0x1cc14afe86554744d27832571059213d6463e9fdfb9361c6c645b50bf8033d0f	0x1c17622cfa9b6fd2043a76dfc39a5b5a109aa708	0xf57e7e7c23978c3caec3c3548e3d615c346e79ff	0	0xa9059cbb0000000000000000000000003b59a023d74aceca4b10b134fd218f887fa0ec1b0000000000000000000000000000000000000000000009957ecc638a7c4c0000	16113062	0x2a90818417323df876bb4058ed8c6a6159304c9f5333923d6fa804edaed9dc62
1520	0x20d629f9eedc664e3d86d7749305eac46b16a04b2d5681399896a30a307857ed	0x2bc2bad21594c5d0ffdb9e36e9931bbe382b447c	0x7a250d5630b4cf539739df2c5dacb4c659f2488d	1.2e+17	0xb6f9de95000000000000000000000000000000000000000000000000000000000000000000000000000000000000000000000000000000000000000000000000000000800000000000000000000000002bc2bad21594c5d0ffdb9e36e9931bbe382b447c00000000000000000000000000000000000000000000000000000000638ce1260000000000000000000000000000000000000000000000000000000000000002000000000000000000000000c02aaa39b223fe8d0a0e5c4f27ead9083c756cc200000…	16113062	0x2a90818417323df876bb4058ed8c6a6159304c9f5333923d6fa804edaed9dc62
1521	0x90abb00da2d5b9e34eb31d0736987122d355da86fe3f0f5a76ca602ef8a24f46	0x03671b7c11cb749de612bb460cef8bc3f6e6db06	0xf2a0ef4672d76403b90dc7d7dd8d12c4f9d013b3	0	0xcac40eb00000000000000000000000000000000000000000000000000000000000000060000000000000000000000000000000000000000000000000000000000000030000000000000000000000000000000000000000000000000000000000000005a000000000000000000000000000000000000000000000000000000000000000140000000000000000000000000000000000000000000000000000000000000001000000000000000000000000000000000000000000000000000000000000000100000…	16113062	0x2a90818417323df876bb4058ed8c6a6159304c9f5333923d6fa804edaed9dc62
1524	0x0e04b22b7d115993588a50b5fc608770099b8e2e589152e111f36c435050dc39	0x30664ee7b0f569cff3c84c48a33c30751a5ad843	0x95ad61b0a150d79219dcf64e1e6cc01f0b64c4ce	0	0xa9059cbb000000000000000000000000cd82756ca22da9a3db03e90dea988d66e08ef2aa0000000000000000000000000000000000000000006c3c80b72db6383fb90000	16113062	0x2a90818417323df876bb4058ed8c6a6159304c9f5333923d6fa804edaed9dc62
1525	0xda2e63335f7f40d6247d93f8a512bf77dfdacc48369e60a87d60d336f4eb4f41	0x0079ce80043edc3325598e4a3b6293ab779bf174	0x244cf1def777a5030b93516fc74fc081221c1ad6	0	0x3d18b912	16113062	0x2a90818417323df876bb4058ed8c6a6159304c9f5333923d6fa804edaed9dc62
1526	0xdf6b92db80f3ee8cea03fe50f4df9eb7b02c3802e59d6636754e384b6fa7d78d	0x4e5f940c23cec8ae37b16429523e5e0b91ec271c	0x39da41747a83aee658334415666f3ef92dd0d541	1.76e+16	0x9a2b81150000000000000000000000000000000000000000000000000000000000000020000000000000000000000000000000000000000000000000000000000000000100000000000000000000000000000000000000000000000000000000000000200000000000000000000000000000000000000000000000000000000000000004000000000000000000000000000000000000000000000000003e871b540c0000000000000000000000000000000000000000000000000000000000000000006000000…	16113062	0x2a90818417323df876bb4058ed8c6a6159304c9f5333923d6fa804edaed9dc62
1527	0x54e852fdaec7716d31ae70abb8c2a165d5d217ee311f4669e4ca3a0731cebbe3	0xf46e7fe0149f3502ad98621b052fabc2bcc819d9	0x2361d16da1438db9e4af8ffef8807754968f1f9f	0	0xf2fde38b000000000000000000000000b065816f952b13474d8eb40398f964443df9f07d	16113062	0x2a90818417323df876bb4058ed8c6a6159304c9f5333923d6fa804edaed9dc62
1530	0xc84d0b6899a865ed1b795b2e2f41594893e5c93dd215a815a600cf558a3170a5	0x1be210e7990eff6c07cb8cadcb9d077063ac3614	0xc2a25240520029250956cbd779b50b25fde30066	2100000000000000	0x	16113062	0x2a90818417323df876bb4058ed8c6a6159304c9f5333923d6fa804edaed9dc62
1531	0x2c87d27823b166d09e1379c2707ce6e0ae540c45da3eeaf99cfef442faaf34ce	0x1be210e7990eff6c07cb8cadcb9d077063ac3614	0x33145e5e2097845529a2a7052fd8b8951f1300c2	2100000000000000	0x	16113062	0x2a90818417323df876bb4058ed8c6a6159304c9f5333923d6fa804edaed9dc62
1532	0xdfd5cd96170991b4da52718c7ed9c3053a25fb175bd75bd18d5c7c84203a0b66	0xc5a93444cc4da6efb9e6fc6e5d3cb55a53b52396	0xa0c85a2ae7ccda6b6a02463e2f65b64171735a99	3690000000000000	0x	16113062	0x2a90818417323df876bb4058ed8c6a6159304c9f5333923d6fa804edaed9dc62
1534	0x4322c1c7b3f10f090adb18010c6f783e89642f92d82cc0d3fae7d35d8fda9f0f	0x537b55f5ecedc8cc9a07e76fb9695ecbb5d35ea5	0x881d40237659c251811cec9c364ef91dc08d300c	7.6e+17	0x5f575529000000000000000000000000000000000000000000000000000000000000008000000000000000000000000000000000000000000000000000000000000000000000000000000000000000000000000000000000000000000a8c0ff92d4c000000000000000000000000000000000000000000000000000000000000000000c00000000000000000000000000000000000000000000000000000000000000017616972737761704c696768743346656544796e616d696300000000000000000000000…	16113062	0x2a90818417323df876bb4058ed8c6a6159304c9f5333923d6fa804edaed9dc62
1535	0xb1c03e22dd5006d7d88040fd43b21bfa2c9c9700d0640dac57fb9c001e36c730	0x1d1543e40353515392491be333f6b66cf72def90	0x7a250d5630b4cf539739df2c5dacb4c659f2488d	1e+17	0xb6f9de95000000000000000000000000000000000000000000000000000000000000000000000000000000000000000000000000000000000000000000000000000000800000000000000000000000001d1543e40353515392491be333f6b66cf72def9000000000000000000000000000000000000000000000000000000000638ce11d0000000000000000000000000000000000000000000000000000000000000002000000000000000000000000c02aaa39b223fe8d0a0e5c4f27ead9083c756cc200000…	16113062	0x2a90818417323df876bb4058ed8c6a6159304c9f5333923d6fa804edaed9dc62
1536	0xbf370c62f9d316d5e7a99e0672a768c2e86fa3ca962e31d170d700e6add98b99	0x1be210e7990eff6c07cb8cadcb9d077063ac3614	0x7b7655e25895002c5f05c99f6cf85e504fe33dbc	2100000000000000	0x	16113062	0x2a90818417323df876bb4058ed8c6a6159304c9f5333923d6fa804edaed9dc62
1538	0xf9309047e57b58d096a7c89842d66b813e3dae0e9d57c55f0900498455ccf4aa	0x3bb40e785dc6758c34e4694c0068537db7532ec4	0x48b00455196e66400c1adc570f823ca9cfa3a24c	9.03e+17	0x	16113062	0x2a90818417323df876bb4058ed8c6a6159304c9f5333923d6fa804edaed9dc62
1539	0x08a5851f5ee47b0ccba3ada630cf887549ff7b85fce1d54dcba525d5024a41d6	0x1be210e7990eff6c07cb8cadcb9d077063ac3614	0xd73335998144192291991d60f1c9b77e932dd698	2100000000000000	0x	16113062	0x2a90818417323df876bb4058ed8c6a6159304c9f5333923d6fa804edaed9dc62
1540	0x826bb5470c9e4b695956070acdf43d5b864cf44be19545ca8732a3ab8ff7f5b2	0x4ad60235be56324b9dc08bb831a202405d47dc30	0xaaecf92bee252ad8a31fdb66aa80e733aa7de609	0	0x0000000000e80000000000000000000000000000000000000018fb81212ee764aa3364f17a4d01c6f1751fd97c2bd3d7e7f1d5055475920a8c93cffb64d039a8205f7acc7722d30000000000000000000000000000000000000000000000005a2e5d2cfb20b400694104cb9b3ae493f94e71b5c1771d6f310e28a1af8a24d6394d706e3bd60caf77c02aaa39b223fe8d0a0e5c4f27ead9083c756cc20301e4bee12b74093f15a7e3bb5f3348892a9efd24ab4e65bf87b73d0bb86b756d246b175474e89094c44…	16113062	0x2a90818417323df876bb4058ed8c6a6159304c9f5333923d6fa804edaed9dc62
1541	0x93f9964c187b8671fe0a9116ccbcc660ee9fdb4bdd3f226dba5d231fad14f430	0x75ce4df17665543f594746e20bb956f12b0a373e	0xe2efbb43fe5df9249987d6700b3a323398170b41	0	0x4e71d92d	16113062	0x2a90818417323df876bb4058ed8c6a6159304c9f5333923d6fa804edaed9dc62
1544	0x351259b4ef7c70b11264cc97d6d7a90ee5f084fd3628a06f70ca0d786ed2e2a2	0xd9dab6e0dd1f2c1463eb0f93f8563360316fa1c8	0x283af0b28c62c092c9727f1ee09c02ca627eb7f5	4370000000000000	0xf7a1696300000000000000000000000000000000000000000000000000000000000000c0000000000000000000000000d9dab6e0dd1f2c1463eb0f93f8563360316fa1c80000000000000000000000000000000000000000000000000000000001e1855807683337e954bcc449a5f9093bd76e3ce73d09b5d9a1c5dc02640cef8af229e40000000000000000000000004976fb03c32e5b8cfe2b6ccb31c09ba78ebaba41000000000000000000000000d9dab6e0dd1f2c1463eb0f93f8563360316fa1c800000…	16113062	0x2a90818417323df876bb4058ed8c6a6159304c9f5333923d6fa804edaed9dc62
1545	0x2ce43b42464e230e63fb126a8d28cf6e10ce5b0ad2092f8a7b2e65a42b6048a9	0x0401f41d93a0b5152a7c8319bdce9426d229b9e4	0x6b175474e89094c44da98b954eedeac495271d0f	0	0x095ea7b300000000000000000000000076f4eed9fe41262669d0250b2a97db79712ad855ffffffffffffffffffffffffffffffffffffffffffffffffffffffffffffffff	16113062	0x2a90818417323df876bb4058ed8c6a6159304c9f5333923d6fa804edaed9dc62
1546	0xa3ab7ddba3eec3f3ac78b91f7c42a6cddbe07fc78de6410e5b18ded3c4e38d87	0x13a5d80ec23aa00642c7b477537deab8aae67996	0xeeeec6476073778077b40a73fe32e23a9876cab4	7.94e+16	0x2b66d72e000000000000000000000000000000000000000000000000000000000000002000000000000000000000000000000000000000000000000000000000000000ea65794a68624763694f694a46557a49314e694973496d74705a434936496a64684e6a526c5a6d51314c544a694e4463744e475a6a5a6931684f4463784c5445785a6d59354f5451345954646a4f434a392e436751784d6a553545674e56553051614a4459334d4449774e4759314c54566c5a5451744e4459335a4331684d7a51324c5…	16113062	0x2a90818417323df876bb4058ed8c6a6159304c9f5333923d6fa804edaed9dc62
1547	0xbbcc8c8a7dc82bce08822bd26e97b8c50426bd3402e14c808345d15df9058292	0x7964fbbf8c367773533ed91e05a8d12d36aae336	0x73be082f945bd10ecb3b287bcd15fd3ded626342	3540000000000000	0x	16113062	0x2a90818417323df876bb4058ed8c6a6159304c9f5333923d6fa804edaed9dc62
1548	0x74a4e329f4d48f46ab08e65c2612c7eb11d87055a341dbdeb9184429d474b0df	0xaa957b57e10b54cb09a91831375f88cb0aaac297	0xe2efbb43fe5df9249987d6700b3a323398170b41	0	0x4e71d92d	16113062	0x2a90818417323df876bb4058ed8c6a6159304c9f5333923d6fa804edaed9dc62
1549	0xad6fdf5d7048c391918dfb48e5bcb8ea39a10a348a61873a8e332266724a8d13	0x6bf7d5a4fe2020f8afdd248b7a859c755fbaaead	0xdf4f2bd9a50d8a277da86ead63bb5aa4e07f138a	2850000000000000	0x	16113062	0x2a90818417323df876bb4058ed8c6a6159304c9f5333923d6fa804edaed9dc62
1552	0x2b42d5c475f4b2e68ab88a2d8394615ce92181e37b42c361ecdfdc33a0dced29	0x28c6c06298d514db089934071355e5743bf21d60	0x767fe9edc9e0df98e07454847909b5e959d7ca0e	0	0xa9059cbb000000000000000000000000a173e88e9fa41a643fa5d6e987d7e707b554e9250000000000000000000000000000000000000000000000009b6749aba2d30000	16113062	0x2a90818417323df876bb4058ed8c6a6159304c9f5333923d6fa804edaed9dc62
1555	0x26c16d2c1d44c9edca9718974a7ddc0a906f3fa86720f70926ed350ce32fb84b	0xb9b5cd40fc69871eb579872b5e8065a29d2906da	0xba12222222228d8ba445958a75a0704d566bf2c8	30000000000000	0xb95cac28d1ec5e215e8148d76f4460e4097fd3d5ae0a35580002000000000000000003d3000000000000000000000000b9b5cd40fc69871eb579872b5e8065a29d2906da000000000000000000000000b9b5cd40fc69871eb579872b5e8065a29d2906da0000000000000000000000000000000000000000000000000000000000000080000000000000000000000000000000000000000000000000000000000000008000000000000000000000000000000000000000000000000000000000000000e000000…	16113062	0x2a90818417323df876bb4058ed8c6a6159304c9f5333923d6fa804edaed9dc62
1556	0xe9e865db0ccc3dc3a438d3561208c364651bd8a2e8818e040b1a439814714f77	0x20bb82f2db6ff52b42c60ce79cde4c7094ce133f	0x10b7e472fccf0ea94e6f10f585110bb2f7901201	919000000000000	0x	16113062	0x2a90818417323df876bb4058ed8c6a6159304c9f5333923d6fa804edaed9dc62
1558	0x852a2907af728487b57e61d62a712a6f0a65bc4b24b5ebdbf4028d8f5a8c45b6	0x8864afd0c2e8fb24106503af89a9763daf387b55	0x00000000006c3852cbef3e08e8df289169ede581	0	0xfb0f3ee10000000000000000000000000000000000000000000000000000000000000020000000000000000000000000c36cf0cfcb5d905b8b513860db0cfe63f6cf9f5c00000000000000000000000000000172000000000000000000000000000000000000000000000000000000000000000000000000000000000000000000000001000000000000000000000000e179b3db9cb6c9e8316c13159535239fbecbcc66000000000000000000000000004c00500000ad104d7dbd00e3ae0a5c00560c0000000…	16113062	0x2a90818417323df876bb4058ed8c6a6159304c9f5333923d6fa804edaed9dc62
1560	0x024ce6055b7f1388502fe5d2ae9b9f4ccec44d4e28962db64bcb508f8040c4b3	0x8317faab7c2c3fa832dc47c62746af017ccffe21	0x80313d5db1da630b952bd4af81d6585c4c3f984d	0	0x42842e0e0000000000000000000000008317faab7c2c3fa832dc47c62746af017ccffe210000000000000000000000005a888470fd088012031c95636e6780d85ca0e4430000000000000000000000000000000000000000000000000000000000001644360c6ebe	16113062	0x2a90818417323df876bb4058ed8c6a6159304c9f5333923d6fa804edaed9dc62
1561	0xd3c88705cdee3f899d0af78b5509d2bf5d535a168e63f4891c851a40e2a6bf66	0x690b9a9e9aa1c9db991c7721a92d351db4fac990	0x388c818ca8b9251b393131c08a736a67ccb19297	2.31e+16	0x	16113062	0x2a90818417323df876bb4058ed8c6a6159304c9f5333923d6fa804edaed9dc62
1562	0x42f237755056e7b7269b5aeb1ecf3842c6742236ee09458a8446e7ba5bc11d84	0x4976a4a02f38326660d17bf34b431dc6e2eb2327	0x42b1459b2e0558215cd895582ce96690008bb444	2.33e+16	0x	16113062	0x2a90818417323df876bb4058ed8c6a6159304c9f5333923d6fa804edaed9dc62
1564	0x2a75ffd4d7efb1fa7826166fbdae0011c3864c196639c0aa07902d9b575897e7	0x41aa7d375914ea1cb5a855642fc1924fd7e4ea17	0xeeeec6476073778077b40a73fe32e23a9876cab4	7.94e+16	0x2b66d72e000000000000000000000000000000000000000000000000000000000000002000000000000000000000000000000000000000000000000000000000000000ea65794a68624763694f694a46557a49314e694973496d74705a434936496a64684e6a526c5a6d51314c544a694e4463744e475a6a5a6931684f4463784c5445785a6d59354f5451345954646a4f434a392e436751784d6a553545674e56553051614a44453259544d334e3255354c5452685a4441744e444a694d5331695a6a6b774c5…	16113062	0x2a90818417323df876bb4058ed8c6a6159304c9f5333923d6fa804edaed9dc62
1566	0xe803339604ea73fa2acf71dbc8f9b4fce006fe6589ae51b4dbe208730670e4af	0xcf850f7b4dbb0bde39835af4e07b73c3df5a19f3	0xc02aaa39b223fe8d0a0e5c4f27ead9083c756cc2	0	0xa9059cbb000000000000000000000000a346473b515afc14390d642fd1de68329a9c8ce10000000000000000000000000000000000000000000000000036fcfc88637288	16113062	0x2a90818417323df876bb4058ed8c6a6159304c9f5333923d6fa804edaed9dc62
1567	0xa596d5f9d4db5d5d4577c32bb38372306aa80fa3201b70501621cfed43769db1	0x66b916954cfc395d3491f1f3c43c93988c68169a	0x76f4eed9fe41262669d0250b2a97db79712ad855	7.3e+17	0xf17a454600000000000000000000000000000000000000000000000000000000000000c000000000000000000000000000000000000000000000000000000000000001a00000000000000000000000000000000000000000000000000000000036db62b500000000000000000000000000000000000000000000000000000000364ef3a40000000000000000000000001d64fb0ffa8362b2e1ee7ee03929159551eab26e000000000000000000000000000000000000000000000000000000000000022000000…	16113062	0x2a90818417323df876bb4058ed8c6a6159304c9f5333923d6fa804edaed9dc62
1568	0xff23517eb09026556074e0ef25d83ef8bf18c61d5390b1c659d9cdf10ca0ed73	0xaf44843880c902a0d75762e2281844bac505dd24	0x06450dee7fd2fb8e39061434babcfc05599a6fb8	0	0x9ff054df0000000000000000000000000000000000000000000000000000000000000078	16113062	0x2a90818417323df876bb4058ed8c6a6159304c9f5333923d6fa804edaed9dc62
1570	0x36ab636fd4dc96347b007ddfa9e904916abd82f3af88b481808f5ed3eda3fc10	0xce72c17f6e4c4c59274ceff019f5c038c1b3aa34	0x90576dcaf196ad7067c2667f455471a819a816a6	2220000000000000	0x	16113062	0x2a90818417323df876bb4058ed8c6a6159304c9f5333923d6fa804edaed9dc62
1571	0xad7883120246ae54c71483488fedb5596a96467a92bba7bfc3fa9a1a685c796c	0xdcff76ec0615ca94cfe5d8f2cda6377521436ac6	0xfcba3e75865d2d561be8d220616520c171f12851	0	0x1a4d01d2000000000000000000000000000000000000000000000003ef7d495dd7702aa000000000000000000000000000000000000000000000000000000000000000010000000000000000000000000000000000000000000000000000000004954acb	16113062	0x2a90818417323df876bb4058ed8c6a6159304c9f5333923d6fa804edaed9dc62
1572	0x8d5805272b3a581aaf14cdeb12bc09354a9e2ba022d9b546030fc211ee694b2a	0xe2ed0e9ce0794206c549f8c9fb246977e80f0f4b	0xf61f24c2d93bf2de187546b14425bf631f28d6dc	0	0xa22cb465000000000000000000000000f42aa99f011a1fa7cda90e5e98b277e306bca83e0000000000000000000000000000000000000000000000000000000000000001	16113062	0x2a90818417323df876bb4058ed8c6a6159304c9f5333923d6fa804edaed9dc62
1574	0x3b3e17a9763977f1fa65d7f8f69a3ddaf2aff1623a269a824efe0fe8ebd5c598	0x3010b8ebdffcc76831574d923a1d80d1a203f11c	0xb6bbe79b03b8865f994cd4917729e168162f7800	1500000000000000	0x	16113062	0x2a90818417323df876bb4058ed8c6a6159304c9f5333923d6fa804edaed9dc62
1575	0x34da3026f9d2cd9bc076c11eb8d84c5e1853e21eb2f5498e0cee8693cb906dcc	0xbbe2374679b45a6ffd3cbd9bbca9719c34708ef4	0x2b591e99afe9f32eaa6214f7b7629768c40eeb39	0	0x52a438b80000000000000000000000000000000000000000000000000000000ba43b74000000000000000000000000000000000000000000000000000000000000001289	16113062	0x2a90818417323df876bb4058ed8c6a6159304c9f5333923d6fa804edaed9dc62
1576	0x0c62aaa9ab8944faf087326cab9efa967f833beda2211f99c10d50f589cb1bf7	0x16ebe2b05308aa66daf7991de8cafb471cdc1f5f	0x7a250d5630b4cf539739df2c5dacb4c659f2488d	0	0x791ac9470000000000000000000000000000000000000000000002369d5ce357aff6466b000000000000000000000000000000000000000000000000000ade3e62a5c6a800000000000000000000000000000000000000000000000000000000000000a000000000000000000000000016ebe2b05308aa66daf7991de8cafb471cdc1f5f00000000000000000000000000000000000000000000000000000000638ce121000000000000000000000000000000000000000000000000000000000000000200000…	16113062	0x2a90818417323df876bb4058ed8c6a6159304c9f5333923d6fa804edaed9dc62
1577	0x59eb32213f21652d097ca82145afbfd1f2e8e267121b1e7864d6bac93f7ed0d2	0x503947a5cef142ba1bab62c6589544ab02e091cc	0xa354eb7872a0b91ab72bb03b5779b74c6c057809	1.5e+16	0x	16113062	0x2a90818417323df876bb4058ed8c6a6159304c9f5333923d6fa804edaed9dc62
1578	0x9eb987a10c62c715fc1940813510755f9e6dc0026ab2110ac9db654475b85192	0x1be210e7990eff6c07cb8cadcb9d077063ac3614	0xc9df7628c4852d44e85169911a5cccdeefc646c5	2100000000000000	0x	16113062	0x2a90818417323df876bb4058ed8c6a6159304c9f5333923d6fa804edaed9dc62
1579	0x6d2fd2b283831787d03a8b8955ad1219b91766d82db9291cd0fa35bec6d967a2	0x4e5b2e1dc63f6b91cb6cd759936495434c7e972f	0xa0b86991c6218b36c1d19d4a2e9eb0ce3606eb48	0	0xa9059cbb000000000000000000000000a5bfb38c5975505054cd3d38b6ec7c1f37a3a90a00000000000000000000000000000000000000000000000000000000b163d5b0	16113062	0x2a90818417323df876bb4058ed8c6a6159304c9f5333923d6fa804edaed9dc62
1580	0x6c0aefb1628e96fbe6791707989bad9287ebb821a5a1e7623568d6c395093e7d	0xb20b86c4e6deeb432a22d773a221898bbbd03036	0x9008d19f58aabd9ed0d60971565aa8510560ab41	0	0x13d79a0b000000000000000000000000000000000000000000000000000000000000008000000000000000000000000000000000000000000000000000000000000000e00000000000000000000000000000000000000000000000000000000000000140000000000000000000000000000000000000000000000000000000000000036000000000000000000000000000000000000000000000000000000000000000020000000000000000000000003af33bef05c2dcb3c7288b77fe1c8d2aeba4d78900000…	16113062	0x2a90818417323df876bb4058ed8c6a6159304c9f5333923d6fa804edaed9dc62
1581	0x1f032c67a80d17e08ce1f9c177164d6c657979457f18fa721cc5a9be8688609d	0xb8fb111f2fdb6d500830f4937892b928bba0eccb	0xedb4e61face0ea4453ca24ea766ba9db9c36f14f	0	0x40ccc082000000000000000000000000b8fb111f2fdb6d500830f4937892b928bba0eccb0000000000000000000000000000000000000000000000000000000000000001	16113062	0x2a90818417323df876bb4058ed8c6a6159304c9f5333923d6fa804edaed9dc62
1582	0x35826f3c342ab29c163254235666688cece47cad48603078467b46977d97827b	0x7954ae3ce3106ca0ba8a540ded667215b2b1498f	0xa0b86991c6218b36c1d19d4a2e9eb0ce3606eb48	0	0xa9059cbb000000000000000000000000e699b7bd75164806a479c9d4e33a2632cb46a62a0000000000000000000000000000000000000000000000000000000b790088f5	16113062	0x2a90818417323df876bb4058ed8c6a6159304c9f5333923d6fa804edaed9dc62
1583	0x8505d2fe0233158446828c114bd28b434313f20126a7a1efaa7031867afc0fdd	0x95b564f3b3bae3f206aa418667ba000afafacc8a	0x4a220e6096b25eadb88358cb44068a3248254675	0	0xa9059cbb0000000000000000000000008b0ad9c0a6317fb26e0f34f825eb6bcdabf5ab7e000000000000000000000000000000000000000000000000016345785d8a0000	16113062	0x2a90818417323df876bb4058ed8c6a6159304c9f5333923d6fa804edaed9dc62
1585	0xa94af5eb9a7c51b24149e344e61027760bc40bec4e58888cc51be424ea92403e	0xcd92beea441abd5d3a8fc166a5535ab3ab258932	0x881d40237659c251811cec9c364ef91dc08d300c	0	0x5f5755290000000000000000000000000000000000000000000000000000000000000080000000000000000000000000785c34312dfa6b74f6f1829f79ade3904222216800000000000000000000000000000000000000000000004b0f66044977def00000000000000000000000000000000000000000000000000000000000000000c000000000000000000000000000000000000000000000000000000000000000136f6e65496e6368563446656544796e616d69630000000000000000000000000000000…	16113062	0x2a90818417323df876bb4058ed8c6a6159304c9f5333923d6fa804edaed9dc62
1586	0x179341ae0fa41a79f2038dc62af40c2e4eacc218f88a2e6b27349edf068b5c6d	0xd4a6f8a832c01471edb1ca610dcaf721b960054a	0x68b3465833fb72a70ecdf485e0e4c7bd8665fc45	0	0x5ae401dc00000000000000000000000000000000000000000000000000000000638ce5bf000000000000000000000000000000000000000000000000000000000000004000000000000000000000000000000000000000000000000000000000000000020000000000000000000000000000000000000000000000000000000000000040000000000000000000000000000000000000000000000000000000000000016000000000000000000000000000000000000000000000000000000000000000e4472b4…	16113062	0x2a90818417323df876bb4058ed8c6a6159304c9f5333923d6fa804edaed9dc62
1587	0x11bc6d9555bf3b3beb3a1224c8b33bfba34a6f687a367d163d18a8858fa35e46	0x5041ed759dd4afc3a72b8192c143f72f4724081a	0xdac17f958d2ee523a2206206994597c13d831ec7	0	0xa9059cbb000000000000000000000000fbcae7151dbb9d95b23fd8da880b2c4557d7f4620000000000000000000000000000000000000000000000000000000039ef8b00	16113062	0x2a90818417323df876bb4058ed8c6a6159304c9f5333923d6fa804edaed9dc62
1588	0xd7ffd8f254b3d55bb522591207d90c9ee81279af39208c794243cdfc007a7382	0x88d451d8a8246216003adc9eb1624e3a3c81f41b	0xa0b86991c6218b36c1d19d4a2e9eb0ce3606eb48	0	0xa9059cbb000000000000000000000000ff245636b1cc4a12fa77b4ca8e6438f87d3b793d000000000000000000000000000000000000000000000000000000026874af38	16113062	0x2a90818417323df876bb4058ed8c6a6159304c9f5333923d6fa804edaed9dc62
1589	0x021a35edd22f9bb2839afacebd8031039e1f9061b00acdb2918270fbf22f82ec	0x9696f59e4d72e237be84ffd425dcad154bf96976	0x6e86a1d91bbe2f0b24b08f1c15445b88ce5f9dcf	3.97e+17	0x	16113062	0x2a90818417323df876bb4058ed8c6a6159304c9f5333923d6fa804edaed9dc62
1590	0xc8c8c81e221e0b46048e11b789ba9a5a476820e66b5cfe7143c20665cafdad94	0xa46733e3658d3e04ddaf3bacd4dbe65ea37437d3	0x27f6e34447574020d14181b2ef292c84618ce7c9	2930000000000000	0x	16113062	0x2a90818417323df876bb4058ed8c6a6159304c9f5333923d6fa804edaed9dc62
[truncated: 20,135 more rows]
