# Supplementary material for: Detection of malicious nodes based on consortium blockchain
Source: PeerJ Comput Sci. 2024 Jun 12;10:e2108. doi: 10.7717/peerj-cs.2108 (PMC11232615; doi:10.7717/peerj-cs.2108)
Supplement: Supplemental Information 3 — The node's transaction time, transaction address, and block number. [file peerj-cs-10-2108-s003.xlsx]

## Sheet: Sheet1
	hash	from_address	to_address	value	input	block_number	block_hash
33336	0xdbb366ae39c4d2e6b13d0f81a67224ac4534cd027c1117a3973c732a5b5f2bbf	0x6a495c3bef3bb66840a9405eaf5edff42f930ff5	0xafe9e2ca9cc54597dce87120336354e93f9649f0	2900000000000000	0x	16112862	0x25bbc415c8cfceff05235db5376c890a36e72436d3ef3a7488efd7e073d134c3
33337	0xada6a4dba89172e16102193b935d34a1f315ff8789fbf426ef05b9986a08d715	0x95a9bd206ae52c4ba8eecfc93d18eacdd41c88cc	0x7982f77752c8505013c5a7e55814608b04269d31	2.38e+17	0x	16112862	0x25bbc415c8cfceff05235db5376c890a36e72436d3ef3a7488efd7e073d134c3
33338	0x8ef2df540ffb79dba643ac7fedc4912a1c44417c02763e06ebb1810f36fc93c9	0x19f494583c7c933be7b0ee58104ddafac1e8adfa	0xdbd324b73f6f85bf9013b75c442021303b635ff9	1.47e+16	0xa9059cbb0000000000000000000000006ab00ac1c02d5caff981402cd95988f52d6fe2fd000000000000000000000000000000004ede2fe03af24e1d890afce6c43c98fe	16112862	0x25bbc415c8cfceff05235db5376c890a36e72436d3ef3a7488efd7e073d134c3
33339	0xe0361c90a123164a61cf5d0b17fa93dd51c1874493ecc187d7234d8515155f7a	0xc680fa3be4437da0038aeb10095b71161d43d2fc	0x1935eee38315738e649bdb170ba6e0236b96ca99	5e+16	0x	16112862	0x25bbc415c8cfceff05235db5376c890a36e72436d3ef3a7488efd7e073d134c3
33341	0xe6d133ba5f6283086b8437fbbb1ab87b7eb7c4f02d1aca4000ae72f45b85311e	0x5d29c1dbb28a487d247951c992d007c5a80f580d	0xdac17f958d2ee523a2206206994597c13d831ec7	0	0xa9059cbb000000000000000000000000b7fb142b62b94d2dbb55bb6d360dbbab664ee52d0000000000000000000000000000000000000000000000000000000006d0b0a0	16112862	0x25bbc415c8cfceff05235db5376c890a36e72436d3ef3a7488efd7e073d134c3
33343	0x92a667884a0fa0d3cc8efe408e6bcf497ad4bceb0caa778942c553815be78bc5	0x1be210e7990eff6c07cb8cadcb9d077063ac3614	0x5b8f2ef44fb372934ccee68b3ca353a53e0bbcf9	2100000000000000	0x	16112862	0x25bbc415c8cfceff05235db5376c890a36e72436d3ef3a7488efd7e073d134c3
33346	0x9f1180bf502a39945e0d49fab01c7c337acd39be241cb2c2870ad30724fa3e5f	0xd720fc3e6e36fbae705b697564b19b40aa5609fc	0x68b3465833fb72a70ecdf485e0e4c7bd8665fc45	0	0x5ae401dc00000000000000000000000000000000000000000000000000000000638cdc53000000000000000000000000000000000000000000000000000000000000004000000000000000000000000000000000000000000000000000000000000000020000000000000000000000000000000000000000000000000000000000000040000000000000000000000000000000000000000000000000000000000000016000000000000000000000000000000000000000000000000000000000000000e4472b4…	16112862	0x25bbc415c8cfceff05235db5376c890a36e72436d3ef3a7488efd7e073d134c3
33347	0x6cca5a019274771b91cfd34e5e5b2ff50138bbf74e084ee1f5cd33af0176fe55	0xeb2629a2734e272bcc07bda959863f316f4bd4cf	0x8cd97a2154219e80c7d98e9447f2332aecf73bc3	3.77e+16	0x	16112862	0x25bbc415c8cfceff05235db5376c890a36e72436d3ef3a7488efd7e073d134c3
33348	0xef905d79ef55f8ddaae2c28f86c726e86945185fa731fccc707339dad38b17a7	0x422251eb379ac25c8a981ade561c22de154d9575	0x25553828f22bdd19a20e4f12f052903cb474a335	0	0x791ac9470000000000000000000000000000000000000000000096ed7b7010533150e85000000000000000000000000000000000000000000000000002b1f648254e259400000000000000000000000000000000000000000000000000000000000000a0000000000000000000000000422251eb379ac25c8a981ade561c22de154d957500000000000000000000000000000000000000000000000000000000638cdbff000000000000000000000000000000000000000000000000000000000000000200000…	16112862	0x25bbc415c8cfceff05235db5376c890a36e72436d3ef3a7488efd7e073d134c3
33350	0xa4aa2c8a355932bb0dc197b2ae4b9f6db93c651635f58f1ee44b53b7acdee419	0x1be210e7990eff6c07cb8cadcb9d077063ac3614	0xe0bf51f2e4b61bbeadccf332ca6d7656b6894fe8	2100000000000000	0x	16112862	0x25bbc415c8cfceff05235db5376c890a36e72436d3ef3a7488efd7e073d134c3
33353	0x17fa7f4957e4040948cb0d6639b8eed737c03375236db945cda385d276d003b2	0xdfd5293d8e347dfe59e90efd55b2956a1343963d	0xdac17f958d2ee523a2206206994597c13d831ec7	0	0xa9059cbb000000000000000000000000e8ee144cc038169a9a85af9868e3113c7c20494900000000000000000000000000000000000000000000000000000002517cfcab	16112862	0x25bbc415c8cfceff05235db5376c890a36e72436d3ef3a7488efd7e073d134c3
33354	0xa23ef49ba2cda172d091b54e3e643f09458003241756230eabb028c557eb5aec	0x95b564f3b3bae3f206aa418667ba000afafacc8a	0xdac17f958d2ee523a2206206994597c13d831ec7	0	0xa9059cbb00000000000000000000000056b3bae24453315c3887de1da7f55256e8680545000000000000000000000000000000000000000000000000000000001d2a2499	16112862	0x25bbc415c8cfceff05235db5376c890a36e72436d3ef3a7488efd7e073d134c3
33355	0x28fe59be7713e7a4340a225583842494646bc6b2d2086c7d5649510155fb5687	0x47bc4b286e8186f8e9f155da7136a050444849c9	0xa0b86991c6218b36c1d19d4a2e9eb0ce3606eb48	0	0x095ea7b300000000000000000000000019456818e85d57cfc173c9cbeea52b9df91fcc750000000000000000000000000000000000000000000000000000000000000000	16112862	0x25bbc415c8cfceff05235db5376c890a36e72436d3ef3a7488efd7e073d134c3
33356	0x1d5ade12a8bb188d5f831bd6038ecc31e9f5aab64582996bfb89bbfd8e7fb770	0x5841c4a3d272de472fd363d057dc83996272239a	0x00000000006c3852cbef3e08e8df289169ede581	4600000000000000	0xfb0f3ee1000000000000000000000000000000000000000000000000000000000000002000000000000000000000000000000000000000000000000000000000000000000000000000000000000000000000000000000000000000000000000000000000000000000000000000000000000000000000000000000000000f1de66384f000000000000000000000000000b834c0c13a60c8406cba662e0e0c286db69fb6eb000000000000000000000000004c00500000ad104d7dbd00e3ae0a5c00560c0000000…	16112862	0x25bbc415c8cfceff05235db5376c890a36e72436d3ef3a7488efd7e073d134c3
33358	0x6d5cc84439f530312dba99e8e0298cb3662712889d7bfc72ecc4238effd01ff1	0xe23c429ad5aabb3528be5666ea9364c9e6dfe541	0x569ae11686f1a6b3182224f6b041f50d4eb758e4	0	0x69328dec000000000000000000000000ab3bbd3076b5abe68482a80fb1cdbf7805a6040e00000000000000000000000000000000000000000000000254c59db0df1b6ad000000000000000000000000097be09f2523b39b835da9ea3857cfa1d3c660cbb	16112862	0x25bbc415c8cfceff05235db5376c890a36e72436d3ef3a7488efd7e073d134c3
33361	0x2df74a2e466e3fc49024402e132d0803fa245884cea840e4a8b9578ad4f45fb6	0xb6fbabe76fa8872f6949687ea4c99c946d91cec5	0x5aa158404fed6b4730c13f49d3a7f820e14a636f	0	0x095ea7b300000000000000000000000068b3465833fb72a70ecdf485e0e4c7bd8665fc45ffffffffffffffffffffffffffffffffffffffffffffffffffffffffffffffff	16112862	0x25bbc415c8cfceff05235db5376c890a36e72436d3ef3a7488efd7e073d134c3
33362	0x8da1b0848a862cfad3ee630d608923c0f41cfe7b719b3ce35fffd3f04c6259a1	0x1be210e7990eff6c07cb8cadcb9d077063ac3614	0x2c519ae079f7068e43189a6cf46df4664a2b2d14	2100000000000000	0x	16112862	0x25bbc415c8cfceff05235db5376c890a36e72436d3ef3a7488efd7e073d134c3
33364	0x608669dc41fbe671fa37d5a3fd84ac5c3d099db59345271bc7f855778b0f23bf	0xbf786d2c25f1373858302efc18aa0a25c9f0bfd9	0xc5bbae50781be1669306b9e001eff57a2957b09d	0	0xa9059cbb00000000000000000000000026dc4a7131567de332d1bbf6a8f895f7c67db62f000000000000000000000000000000000000000000000000000000008d8f9fc0	16112862	0x25bbc415c8cfceff05235db5376c890a36e72436d3ef3a7488efd7e073d134c3
33365	0x9ea7f293f8c0975108481d90706fa8c68674ab0bfb7d2980bbc0710da6d23bc9	0x3cd751e6b0078be393132286c442345e5dc49699	0xd59138d81bb498f8ac02e454c0bcb7f5efa37fdd	1.15e+17	0x	16112862	0x25bbc415c8cfceff05235db5376c890a36e72436d3ef3a7488efd7e073d134c3
33367	0x9c0b093f992f86948900c939eee9569dba838d58f392daa488424d4c8327459d	0xfe24a602a28e0dc67a02c689888a42566e77e2f4	0x68b3465833fb72a70ecdf485e0e4c7bd8665fc45	2e+16	0x5ae401dc00000000000000000000000000000000000000000000000000000000638cc52b00000000000000000000000000000000000000000000000000000000000000400000000000000000000000000000000000000000000000000000000000000001000000000000000000000000000000000000000000000000000000000000002000000000000000000000000000000000000000000000000000000000000000e4472b43f300000000000000000000000000000000000000000000000000470de4df820…	16112862	0x25bbc415c8cfceff05235db5376c890a36e72436d3ef3a7488efd7e073d134c3
33369	0x3cc9d7211356fea810b460b78d499ab000938f267bfccac72e4bfe1443854029	0x512fce9b07ce64590849115ee6b32fd40ec0f5f3	0xbafa44efe7901e04e39dad13167d089c559c1138	4.43e+19	0x4dcd4547000000000000000000000000512fce9b07ce64590849115ee6b32fd40ec0f5f3	16112862	0x25bbc415c8cfceff05235db5376c890a36e72436d3ef3a7488efd7e073d134c3
33370	0xbc6f0b2aef4035e4a62cdb3ef749e9b0b2f8b9ebf0d400a4af120e921469cf44	0x44843e47483638da7bd5d59253cace5b437af375	0x82e0b8cdd80af5930c4452c684e71c861148ec8a	6e+16	0x3ce33bff0000000000000000000000000000000000000000000000000000000000000080000000000000000000000000000000000000000000000000000000000000000000000000000000000000000000000000000000000000000000d529ae9e86000000000000000000000000000000000000000000000000000000000000000000c0000000000000000000000000000000000000000000000000000000000000000d736f636b6574416461707465720000000000000000000000000000000000000000000…	16112862	0x25bbc415c8cfceff05235db5376c890a36e72436d3ef3a7488efd7e073d134c3
33374	0xf8086e5f27b8b396cbb00896caf81fb426876cec1ef079070840977be58ba742	0x78c05a027d66f7b51f65962e31b2ee3de7099095	0x7ec21bad87f164eb25987f95ed29baec55df3873	4.6e+18	0x	16112862	0x25bbc415c8cfceff05235db5376c890a36e72436d3ef3a7488efd7e073d134c3
33375	0x2935c74034936aa01a03ac7aab86da2fce33598cc7d7a874234a157a23b87313	0x931c75b98b4e07c7680ef89758ba539808f0b148	0x881d40237659c251811cec9c364ef91dc08d300c	0	0x5f57552900000000000000000000000000000000000000000000000000000000000000800000000000000000000000007d1afa7b718fb893db30a3abc0cfc608aacfebb00000000000000000000000000000000000000000000000008ac7230489e8000000000000000000000000000000000000000000000000000000000000000000c00000000000000000000000000000000000000000000000000000000000000017616972737761704c696768743346656544796e616d696300000000000000000000000…	16112862	0x25bbc415c8cfceff05235db5376c890a36e72436d3ef3a7488efd7e073d134c3
33376	0x26ca6c43d8d05e8d4df25a9ea8b9043999cdbb862f161480bc0929d80e1b099d	0x56eddb7aa87536c09ccc2793473599fd21a8b17f	0xdac17f958d2ee523a2206206994597c13d831ec7	0	0xa9059cbb00000000000000000000000035a841e70ee2820c0abe24c51a17ef64a69b142c00000000000000000000000000000000000000000000000000000000aa675a20	16112862	0x25bbc415c8cfceff05235db5376c890a36e72436d3ef3a7488efd7e073d134c3
33377	0xa75401a1e427967df5b72530e26ce86c3cf26a5d1594884064e08dda92ac9f2f	0x63a395b574d5e23c3dbc6986be5994ef6743afa8	0x8cacb467e32d16d295ea276f66ebb23ff5bf4125	1680000000000000	0x	16112861	0x7fd72d7fd47bfdfe6608b2f264fe1748d16e9043579f2b8f25d4a65efdb652de
33378	0x392a91abc05f9fbf3480fad911739173779bd46eeee5c9064fd82b6ad2e28cc2	0x46340b20830761efd32832a74d7169b29feb9758	0xec4d489639e8217e38e28c7f4ca05d02811d1718	1.18e+17	0x	16112861	0x7fd72d7fd47bfdfe6608b2f264fe1748d16e9043579f2b8f25d4a65efdb652de
33380	0xd29e0b3c26361b7c4dc0b378db735d015b74b251d82164abccad3fa13f4d982a	0xd43d8e8368bf45dd620b93a750621a5fe03ee578	0x68b3465833fb72a70ecdf485e0e4c7bd8665fc45	0	0x5ae401dc00000000000000000000000000000000000000000000000000000000638cdc47000000000000000000000000000000000000000000000000000000000000004000000000000000000000000000000000000000000000000000000000000000020000000000000000000000000000000000000000000000000000000000000040000000000000000000000000000000000000000000000000000000000000016000000000000000000000000000000000000000000000000000000000000000e4472b4…	16112861	0x7fd72d7fd47bfdfe6608b2f264fe1748d16e9043579f2b8f25d4a65efdb652de
33383	0x744f1f2a948ef891848e4c73a4e39a2d71ae20b5475c47d3a9a8c07114835019	0xc4958aae90d4228ca2316f6e20d9c1f960e058ca	0x449163d11530cd0e9b407900948cca60015bb92b	0	0x095ea7b300000000000000000000000068b3465833fb72a70ecdf485e0e4c7bd8665fc45ffffffffffffffffffffffffffffffffffffffffffffffffffffffffffffffff	16112861	0x7fd72d7fd47bfdfe6608b2f264fe1748d16e9043579f2b8f25d4a65efdb652de
33384	0x2c5bf1c5060dab90ef0c235503b50e36d1ecb427b0bab30562aeceba30c06497	0x98f3523f707281d962281369b953f13033529775	0x0000000000c2d145a2526bd8c716263bfebe1a72	0	0x32389b7100000000000000000000000000000000000000000000000000000000000000400000007b02230091a7ed01230072f7006a004d60a8d4e71d599b8104250f00000000000000000000000000000000000000000000000000000000000000000001000000000000000000000000000000000000000000000000000000000000002000000000000000000000000000000000000000000000000000000000000000600000000000000000000000007de151e3d27fdb209a070c9a977c0481d1f90dc700000…	16112861	0x7fd72d7fd47bfdfe6608b2f264fe1748d16e9043579f2b8f25d4a65efdb652de
33386	0xaa181a11c4cb87eb24ccf44701c7f57691fd9b7e1a49f8f13c75f146394d6dd3	0xfdfc19148bdcf84daa04970c2e9b7064b68cca54	0x4bf858e6490af54f3cc626f19322984453e95995	0	0xecef920100000000000000000000000000000000000000000000000000000000000000630000000000000000000000000000000000000000000000000000000000000076	16112861	0x7fd72d7fd47bfdfe6608b2f264fe1748d16e9043579f2b8f25d4a65efdb652de
33387	0x3cf7ff74146d6ecaddb9de74c5abd55d01bbb0ad229c2b0ac6c4c02bad7322c6	0xdd782574fb6fecfe09bec1ea31571c7828e04c47	0x64192819ac13ef72bf6b5ae239ac672b43a9af08	0	0x4b14557e0000000000000000000000008889897e75631c14453167bb7dde89223cb3d326000000000000000000000000a0b86991c6218b36c1d19d4a2e9eb0ce3606eb48000000000000000000000000000000000000000000000000000000000000000000000000000000000000000000000000000000000000000000000000000000000000000000000000000000000000000000000000000000000000000001b2f0ec	16112861	0x7fd72d7fd47bfdfe6608b2f264fe1748d16e9043579f2b8f25d4a65efdb652de
33388	0x2cc47a4c112a16f0b1f04f1eb19fefd6f544df06a4cf6bcd23a5a5e035b350c0	0x3bf053ca188be60e801fd9912118fa99979e7304	0xeeeec6476073778077b40a73fe32e23a9876cab4	7.95e+16	0x2b66d72e000000000000000000000000000000000000000000000000000000000000002000000000000000000000000000000000000000000000000000000000000000ee65794a68624763694f694a46557a49314e694973496d74705a434936496a64684e6a526c5a6d51314c544a694e4463744e475a6a5a6931684f4463784c5445785a6d59354f5451345954646a4f434a392e436763784d6a55334c6a673445674e56553051614a4442694d574d7a4d54646c4c5759354e6d51744e444e684e6931684d5…	16112861	0x7fd72d7fd47bfdfe6608b2f264fe1748d16e9043579f2b8f25d4a65efdb652de
33389	0xa3c5ddfc2b0db3e9a47c25de3de3bdf17b05e3e72ddb4df8c622329c2af0f3b6	0x6c274c0b4398f01f0e654bf2d0c46e0ce4f4781f	0xeeeec6476073778077b40a73fe32e23a9876cab4	7.95e+16	0x2b66d72e000000000000000000000000000000000000000000000000000000000000002000000000000000000000000000000000000000000000000000000000000000ee65794a68624763694f694a46557a49314e694973496d74705a434936496a64684e6a526c5a6d51314c544a694e4463744e475a6a5a6931684f4463784c5445785a6d59354f5451345954646a4f434a392e436763784d6a55334c6a673445674e56553051614a474e6d4d6d52685a574d334c574a69596a59744e4451334d7930344e5…	16112861	0x7fd72d7fd47bfdfe6608b2f264fe1748d16e9043579f2b8f25d4a65efdb652de
33391	0xdc8e59f0d1a6ee8df7ac4feefd08615bbb542fbc023f6d5c9034e17b64ac9e78	0xf2f5c73fa04406b1995e397b55c24ab1f3ea726c	0x388c818ca8b9251b393131c08a736a67ccb19297	3.88e+16	0x	16112861	0x7fd72d7fd47bfdfe6608b2f264fe1748d16e9043579f2b8f25d4a65efdb652de
33392	0x698c4e8ef2bb9bd064d89d04be0b17812b70eac70d1e513eed0b55ce2894b2e7	0x1537c0ee8ed1ed158145f898c2ddedacf2fc09b8	0x7492e30d60d96c58ed0f0dc2fe536098c620c4c0	0	0xefef39a10000000000000000000000000000000000000000000000000000000000000001	16112861	0x7fd72d7fd47bfdfe6608b2f264fe1748d16e9043579f2b8f25d4a65efdb652de
33393	0xf490c63dcb7c6cd2d7ab9298780b2660ec5756244c7504fd6285d7af70c9a48d	0x80c67432656d59144ceff962e8faf8926599bcf8	0x5e8e40cc5861caebc75fa470a48752f157a28024	9940000000000000	0x	16112861	0x7fd72d7fd47bfdfe6608b2f264fe1748d16e9043579f2b8f25d4a65efdb652de
33394	0xf86d67c73c41e2454f7e976338e56b2e939b9337ad300cd91af501ac9a951d92	0xcc3b9f1bcacd4be46ba30cbc455d52cc795a2b2e	0x70423fc4400c3dc01168ebe23f68d0f3ee9a0123	2900000000000000	0x5b6baa0d00000000000000000000000000000000034925c58c2945fd91ecd6046090d56900000000000000000000000000000000000000000000000000000000000000600000000000000000000000000000000000000000000000000000000000f5dce400000000000000000000000000000000000000000000000000000000000000030000000000000000000000009084e3508ce3448df16f411e748e01831b635edc000000000000000000000000000000000000000000000000000945c7fadd200000000…	16112861	0x7fd72d7fd47bfdfe6608b2f264fe1748d16e9043579f2b8f25d4a65efdb652de
33395	0xee1c3bbda6f904a1f3ffbf40f886e7ed43e0eaa718158ee3fef147e239d5438b	0x39533be65fbf781142752c4582d98e8cefbea78f	0xc6ec80029cd2aa4b0021ceb11248c07b25d2de34	0	0xa22cb4650000000000000000000000001e0049783f008a0085193e00003d00cd54003c710000000000000000000000000000000000000000000000000000000000000001	16112861	0x7fd72d7fd47bfdfe6608b2f264fe1748d16e9043579f2b8f25d4a65efdb652de
33396	0xe07f611cf486b9899d90ed0b722a8f662811c39b56b10fb43fc439bbf7ef7ba9	0x26db20c15a9b1019fd9ea87a9c4dbee4ecf4eb85	0xe2591bd3d77e4ab6a477b8fc776a36f7aee13a1d	8490000000000000	0x	16112861	0x7fd72d7fd47bfdfe6608b2f264fe1748d16e9043579f2b8f25d4a65efdb652de
33398	0x03c3435a7b4c81f480a914216ecd30b77b1ad8ec254b16e79c0b3d644c3008e4	0x6c274c0b4398f01f0e654bf2d0c46e0ce4f4781f	0xeeeec6476073778077b40a73fe32e23a9876cab4	7.95e+16	0x2b66d72e000000000000000000000000000000000000000000000000000000000000002000000000000000000000000000000000000000000000000000000000000000ee65794a68624763694f694a46557a49314e694973496d74705a434936496a64684e6a526c5a6d51314c544a694e4463744e475a6a5a6931684f4463784c5445785a6d59354f5451345954646a4f434a392e436763784d6a55334c6a673445674e56553051614a4755774f47526b4e546c6c4c544a6b595751744e4449775a533034597…	16112861	0x7fd72d7fd47bfdfe6608b2f264fe1748d16e9043579f2b8f25d4a65efdb652de
33402	0x69d8c4ce2ecd52c5112ac04225835204c4ade3ab65c44f327f5830fd11be6df8	0x67491aa0baefc36dae58785fe141782a5d42154b	0x497350844414d589c4c8accae130ac5720036eba	0	0xa22cb4650000000000000000000000001e0049783f008a0085193e00003d00cd54003c710000000000000000000000000000000000000000000000000000000000000001	16112861	0x7fd72d7fd47bfdfe6608b2f264fe1748d16e9043579f2b8f25d4a65efdb652de
33403	0xa53966ab353e699a6febfaa06d7d84b5817b8e3eeee00773756786d250e7fa97	0xb8209dc29464f655a41e88e55a219ef2166f76c8	0xf0d33beda4d734c72684b5f9abbebf715d0a7935	0	0x095ea7b300000000000000000000000068b3465833fb72a70ecdf485e0e4c7bd8665fc45ffffffffffffffffffffffffffffffffffffffffffffffffffffffffffffffff	16112861	0x7fd72d7fd47bfdfe6608b2f264fe1748d16e9043579f2b8f25d4a65efdb652de
33404	0x263c1a3dadf0b3e419ae04f69ee8f65557c6cf12a1a3cb8a06747c6585554c39	0x3e684eeb280367fbb4e2b346dbe2820a7d0440f4	0xd55231b619ec464347d7b6eb12cc7ae19fbbf37d	0	0x095ea7b300000000000000000000000068b3465833fb72a70ecdf485e0e4c7bd8665fc45ffffffffffffffffffffffffffffffffffffffffffffffffffffffffffffffff	16112861	0x7fd72d7fd47bfdfe6608b2f264fe1748d16e9043579f2b8f25d4a65efdb652de
33405	0xbbd90d5323bb6c5e11424012a03d74ad4dfd3f2caaced0a6552ecc3d8dc33685	0x47bc4b286e8186f8e9f155da7136a050444849c9	0xa0b86991c6218b36c1d19d4a2e9eb0ce3606eb48	0	0x095ea7b300000000000000000000000055b916ce078ea594c10a874ba67ecc3d62e298220000000000000000000000000000000000000000000000000000000000000000	16112861	0x7fd72d7fd47bfdfe6608b2f264fe1748d16e9043579f2b8f25d4a65efdb652de
33407	0x881b1f966bd947357a9df62c10e28ab656a8e550c687eebb6103285fec6e2083	0x4976a4a02f38326660d17bf34b431dc6e2eb2327	0x928cb81b86fd4138bef23ce5ed6d882d9d66f8b2	1.59e+16	0x	16112861	0x7fd72d7fd47bfdfe6608b2f264fe1748d16e9043579f2b8f25d4a65efdb652de
33409	0x8b28629709eaaedcbf704ffb7897d9ad1df5bf9c8e0f746dd16a7e477c1e4f85	0x830bcfdadfdd9acfdff494f4e21b0d01557473c7	0x00000000006c3852cbef3e08e8df289169ede581	0	0x5b34b966360c6ebe	16112861	0x7fd72d7fd47bfdfe6608b2f264fe1748d16e9043579f2b8f25d4a65efdb652de
33410	0x936ac309d218345efdfbf2609adb3d4eadbd79f078482e7bfca18cdb08f9ccdf	0xc61db8593bc0e7ca3cba6df6581abe77548d75c8	0x68b3465833fb72a70ecdf485e0e4c7bd8665fc45	1.99e+17	0x5ae401dc00000000000000000000000000000000000000000000000000000000638cdc2f000000000000000000000000000000000000000000000000000000000000004000000000000000000000000000000000000000000000000000000000000000020000000000000000000000000000000000000000000000000000000000000040000000000000000000000000000000000000000000000000000000000000016000000000000000000000000000000000000000000000000000000000000000e442712…	16112861	0x7fd72d7fd47bfdfe6608b2f264fe1748d16e9043579f2b8f25d4a65efdb652de
33411	0x3cf29716f26d920033a382e90773bf7568ae330f3b3f5b1617fbd48f39f52df9	0x974caa59e49682cda0ad2bbe82983419a2ecc400	0xdac17f958d2ee523a2206206994597c13d831ec7	0	0xa9059cbb000000000000000000000000730e446ac22aca8d365033edd30b8075b1831346000000000000000000000000000000000000000000000000000000003b9aca00	16112861	0x7fd72d7fd47bfdfe6608b2f264fe1748d16e9043579f2b8f25d4a65efdb652de
33412	0x2815cf298e2a262c3bdffa9a440d3b7d328be1c5b7d2f62858aa97a994f2ccf9	0x1be210e7990eff6c07cb8cadcb9d077063ac3614	0xd81c92c93aef004b7f04170e566646ef90b143c6	2100000000000000	0x	16112861	0x7fd72d7fd47bfdfe6608b2f264fe1748d16e9043579f2b8f25d4a65efdb652de
33413	0xb3ee7d713f926b06dd2fa9dd1e6c7c3868dd7e7987711abfc9940afdb04e6e34	0x31e9b3373f2ad5d964cad0fd01332d6550cbbde6	0xf83f4fc237c3dfdc8fa7c4188f8346f9e6f90dbd	1.6e+18	0x	16112861	0x7fd72d7fd47bfdfe6608b2f264fe1748d16e9043579f2b8f25d4a65efdb652de
33414	0x02a90f4c0a3e18ef90d0c352ee6d59dcd4332d87bdbcfee4a737e6e39ede6905	0x1be210e7990eff6c07cb8cadcb9d077063ac3614	0x0a63ead43cd5142a74c921315680d02881a17400	2100000000000000	0x	16112861	0x7fd72d7fd47bfdfe6608b2f264fe1748d16e9043579f2b8f25d4a65efdb652de
33415	0x56b86e1f36954e8f1a6d56288aa7b1f0fbdee30fb17066f5846bd75bb5e62b6e	0x3abd7263af164401abeee5894858dfdb803c4710	0x3d91e3cd7c77fdb7251d77c76af879b35ac16213	0	0x0e89439b00000000000000000000000000000000000000000000054b40b1f852bda0000000000000000000000000000000000000000000000000000000000000000000400000000000000000000000000000000000000000000000000000000000000000	16112861	0x7fd72d7fd47bfdfe6608b2f264fe1748d16e9043579f2b8f25d4a65efdb652de
33416	0x9c4587dc55b7399114d8dd136a1e7408e7cd249f36cdabe4f75953698bc0eb3e	0xebb8f70d40d62864eab334c66bb5b88ce558054f	0x76f4eed9fe41262669d0250b2a97db79712ad855	4.45e+18	0xf17a454600000000000000000000000000000000000000000000000000000000000000c000000000000000000000000000000000000000000000000000000000000001a0000000000000000000000000000000000000000000000000000000014e1bd652000000000000000000000000000000000000000000000000000000014ac484d20000000000000000000000001d64fb0ffa8362b2e1ee7ee03929159551eab26e000000000000000000000000000000000000000000000000000000000000022000000…	16112861	0x7fd72d7fd47bfdfe6608b2f264fe1748d16e9043579f2b8f25d4a65efdb652de
33417	0xeb77ef693e01061bf580733dac19ab26a6b4094d798608577544a331e54cad59	0x1be210e7990eff6c07cb8cadcb9d077063ac3614	0x3682a1ae1fc7845515013c8b7a18b0d0b178d71b	2100000000000000	0x	16112861	0x7fd72d7fd47bfdfe6608b2f264fe1748d16e9043579f2b8f25d4a65efdb652de
33418	0x432d06cc33e76ce5e6973b0bb6d67fb8f2e53baa987dff554840d1193df640c0	0x1f650706e9398bcf05f526b51062e3c290b7a783	0x7492e30d60d96c58ed0f0dc2fe536098c620c4c0	0	0xefef39a10000000000000000000000000000000000000000000000000000000000000001	16112861	0x7fd72d7fd47bfdfe6608b2f264fe1748d16e9043579f2b8f25d4a65efdb652de
33419	0x984a7670a8bb28a8981a24a7a4841a4c1bdf61fc59961f17cb11c88497683a27	0xc987277a3cd261e340b289df075ad423166adb98	0xd07e2c79966e284c971409cb35111a90dc6d6641	4e+18	0x	16112861	0x7fd72d7fd47bfdfe6608b2f264fe1748d16e9043579f2b8f25d4a65efdb652de
33422	0xb65443e11d3cdc709af54c4468e1382b4017395f067b3ee791c9a375cd75aad7	0xd807277536a14e2edf3ada71c336f0bccb9e1733	0x7492e30d60d96c58ed0f0dc2fe536098c620c4c0	0	0xefef39a10000000000000000000000000000000000000000000000000000000000000001	16112861	0x7fd72d7fd47bfdfe6608b2f264fe1748d16e9043579f2b8f25d4a65efdb652de
33425	0x05c22a119ceef62f7c993e03d3f2e4fdf307f26e9c406c3f45e5853c5c20810c	0x12178fc891c0d2dec42bfd4b2975646a054d1c67	0xf89d7b9c864f589bbf53a82105107622b35eaa40	7.97e+16	0x	16112861	0x7fd72d7fd47bfdfe6608b2f264fe1748d16e9043579f2b8f25d4a65efdb652de
33426	0xcc41385fdc063c361f42a61222b9e776be9cc84c0bf504b4b104614e78015f19	0x0633bf22749f91d780c5e1ea3ec1029699baf0a4	0x7492e30d60d96c58ed0f0dc2fe536098c620c4c0	0	0xa22cb4650000000000000000000000001e0049783f008a0085193e00003d00cd54003c710000000000000000000000000000000000000000000000000000000000000001	16112861	0x7fd72d7fd47bfdfe6608b2f264fe1748d16e9043579f2b8f25d4a65efdb652de
33427	0x4861a6a151c9a499850b42c171ab1058136534b77c6b41c6bb13027746b8e904	0x7aa0426f10c7603bbfb8ceb8afb8d8c329ccfe8b	0x000000000035b5e5ad9019092c665357240f594e	0	0x00000009ef3ef76a467bccd9d29f223bce8043b84e8c8b282827790f0100000000000000c02aaa39b223fe8d0a0e5c4f27ead9083c756cc20000000002e71578cb32f9c7f359492d26764481002ed88bd2acae83ca50b5c9000bb8000000000000000000000000000000000000000000007ae1d900000000000000000000000000000000	16112861	0x7fd72d7fd47bfdfe6608b2f264fe1748d16e9043579f2b8f25d4a65efdb652de
33428	0xd11e19f51b9ccaa376bf1f6545b8f2de6d9f2c75a0ec49a35134141b1a9fa5fd	0x6c274c0b4398f01f0e654bf2d0c46e0ce4f4781f	0xeeeec6476073778077b40a73fe32e23a9876cab4	7.95e+16	0x2b66d72e000000000000000000000000000000000000000000000000000000000000002000000000000000000000000000000000000000000000000000000000000000ee65794a68624763694f694a46557a49314e694973496d74705a434936496a64684e6a526c5a6d51314c544a694e4463744e475a6a5a6931684f4463784c5445785a6d59354f5451345954646a4f434a392e436763784d6a55334c6a673445674e56553051614a4756694e574d334e4441324c5467354e4463744e4445324e6930355a5…	16112861	0x7fd72d7fd47bfdfe6608b2f264fe1748d16e9043579f2b8f25d4a65efdb652de
33429	0x421b8944e13943c950fe2a1919b2b2600106ab56feddee0189dc6d59c4d09b9d	0xd26b38b300c5a708e178325592a43e666fede3cd	0x39da41747a83aee658334415666f3ef92dd0d541	1000000000000000	0x9a2b8115000000000000000000000000000000000000000000000000000000000000002000000000000000000000000000000000000000000000000000000000000000010000000000000000000000000000000000000000000000000000000000000020000000000000000000000000000000000000000000000000000000000000000400000000000000000000000000000000000000000000000000038d7ea4c68000000000000000000000000000000000000000000000000000000000000000006000000…	16112861	0x7fd72d7fd47bfdfe6608b2f264fe1748d16e9043579f2b8f25d4a65efdb652de
33430	0x601175b1effccb8c9f30007d679e4c922de89e26ea76eed7b15c67f7f361dbd9	0x39f6a6c85d39d5abad8a398310c52e7c374f2ba3	0xdac17f958d2ee523a2206206994597c13d831ec7	0	0xa9059cbb000000000000000000000000e8725e9d28f4090a747e85282df6b0047dd56e7e0000000000000000000000000000000000000000000000000000000006052340	16112861	0x7fd72d7fd47bfdfe6608b2f264fe1748d16e9043579f2b8f25d4a65efdb652de
33434	0x68f0d68169809ca1f2129fa7e67c36255d2566efd856456ab0ab5215f81b4c79	0x42189b841287654e93fc1b2363dc4cc6c066f9a8	0x44e94034afce2dd3cd5eb62528f239686fc8f162	4000000000000000	0xfa2b068f000000000000000000000000ebb973624a34f033431ef5cd0a83d999f566b7240000000000000000000000000000000000000000000000000000000061cca0f0000000000000000000000000000000000000000000000000000000000000000000000000000000000000000000000000000000000000000000000000000000a000000000000000000000000042189b841287654e93fc1b2363dc4cc6c066f9a80000000000000000000000000000000000000000000000000000000000000000	16112861	0x7fd72d7fd47bfdfe6608b2f264fe1748d16e9043579f2b8f25d4a65efdb652de
33438	0xfec4c1ad28056a96e67d41f19e8eabdc2fd975f60589324b81a823c8942077d1	0x4b0401fe6b84c52d4f4310c371c731a2b6d0964d	0xa989d60d3282b4d5e06225b79b48d7570a87f72f	1660000000000000	0x	16112861	0x7fd72d7fd47bfdfe6608b2f264fe1748d16e9043579f2b8f25d4a65efdb652de
33439	0x60ac4bd4f4272c902a31b6d1171f478a9b23a1e3ce85b7b86ef20f78e7c64dab	0x26c9fc612b005781127246bbc5dc39f823e3106e	0xeeeec6476073778077b40a73fe32e23a9876cab4	7.95e+16	0x2b66d72e000000000000000000000000000000000000000000000000000000000000002000000000000000000000000000000000000000000000000000000000000000ee65794a68624763694f694a46557a49314e694973496d74705a434936496a64684e6a526c5a6d51314c544a694e4463744e475a6a5a6931684f4463784c5445785a6d59354f5451345954646a4f434a392e436763784d6a55334c6a673445674e56553051614a474d304e6a52695a4455324c575133593249744e474d78597931694e5…	16112861	0x7fd72d7fd47bfdfe6608b2f264fe1748d16e9043579f2b8f25d4a65efdb652de
33441	0x72dbd39914e07f4a51e4a565a4b08913614f2628d382fdacd1113c9100f3199d	0x547eb32396e2ef542b8e99e2af7758c99027ab59	0xdbe9732d0a8595866be400995e15525e1ccbcaf0	0	0x42842e0e000000000000000000000000547eb32396e2ef542b8e99e2af7758c99027ab59000000000000000000000000c095c47dac26f7e602dbdaf9cc20beac0ef1a82000000000000000000000000000000000000000000000000000000000000001e9360c6ebe	16112861	0x7fd72d7fd47bfdfe6608b2f264fe1748d16e9043579f2b8f25d4a65efdb652de
33442	0x361a39be32a63618e9bc9ed6a729fd5a4422342d9f0a3606470741d55d26e333	0x45a2235b9027eab23ffcf759c893763f0019cbff	0xfaabae17e2da5d7c122fbb2903783459d3f15be5	0	0xa22cb4650000000000000000000000001e0049783f008a0085193e00003d00cd54003c710000000000000000000000000000000000000000000000000000000000000001	16112861	0x7fd72d7fd47bfdfe6608b2f264fe1748d16e9043579f2b8f25d4a65efdb652de
33443	0xa667fcbf3fd10432538087a9fd2f5c516926ce655db94427e12d8c7ebbc93911	0x776c520035cdbd371ae9c1ef56f88692dc2884db	0x06450dee7fd2fb8e39061434babcfc05599a6fb8	0	0x52c7f8dc	16112861	0x7fd72d7fd47bfdfe6608b2f264fe1748d16e9043579f2b8f25d4a65efdb652de
33444	0xccf51c722a6d43567cc307d1c9cc73a6fd40cfaac08938e6f873b96142e07754	0x9d93e3006264e296d3992c2cce1c5d2ee32b579e	0x06450dee7fd2fb8e39061434babcfc05599a6fb8	0	0x9ff054df000000000000000000000000000000000000000000000000000000000000002d	16112861	0x7fd72d7fd47bfdfe6608b2f264fe1748d16e9043579f2b8f25d4a65efdb652de
33445	0xea942e352e2856fa3e656d1547e09a19781460a8c85adf0e39cd4159f423a520	0x0a92b623bdbca3b07c36ddf111d76d6e69fcfe43	0x00000000006c3852cbef3e08e8df289169ede581	3000000000000000	0xfb0f3ee10000000000000000000000000000000000000000000000000000000000000020000000000000000000000000000000000000000000000000000000000000000000000000000000000000000000000000000000000000000000000000000000000000000000000000000000000000000000000000000000000009dbd909407000000000000000000000000000eab9cfce4de544bf98fe70540f6b5217737dbc55000000000000000000000000004c00500000ad104d7dbd00e3ae0a5c00560c0000000…	16112861	0x7fd72d7fd47bfdfe6608b2f264fe1748d16e9043579f2b8f25d4a65efdb652de
33446	0xbacfe462c822bc498cd128bb812f0b9e11846b90698dd83e97da634d5fe82639	0xc6d1c9603757006a57f211e0c6c6ab8c57d35835	0x68b3465833fb72a70ecdf485e0e4c7bd8665fc45	1.9e+18	0x5ae401dc00000000000000000000000000000000000000000000000000000000638cdc2f000000000000000000000000000000000000000000000000000000000000004000000000000000000000000000000000000000000000000000000000000000020000000000000000000000000000000000000000000000000000000000000040000000000000000000000000000000000000000000000000000000000000016000000000000000000000000000000000000000000000000000000000000000e4472b4…	16112861	0x7fd72d7fd47bfdfe6608b2f264fe1748d16e9043579f2b8f25d4a65efdb652de
33447	0x9789f3ac04ffd45911a403dbc6ad8ac4a306607cafeeaf9d042dd7e2ce4e69a6	0x9723b6d608d4841eb4ab131687a5d4764eb30138	0xdac17f958d2ee523a2206206994597c13d831ec7	0	0xa9059cbb00000000000000000000000062bf4ef0b572b5f3c4722f5e9bd81274ec102e28000000000000000000000000000000000000000000000000000000001ad3a65c	16112861	0x7fd72d7fd47bfdfe6608b2f264fe1748d16e9043579f2b8f25d4a65efdb652de
33448	0x9e3034945c03afd712d052f6ad8ee1785dd18ab159b24ce7ee0708a278ad6737	0x68927b4c9d4d06ca8ddb8dde366985c08bc7007e	0xba100000625a3754423978a60c9317c58a424e3d	0	0x095ea7b3000000000000000000000000ba12222222228d8ba445958a75a0704d566bf2c8ffffffffffffffffffffffffffffffffffffffffffffffffffffffffffffffff	16112861	0x7fd72d7fd47bfdfe6608b2f264fe1748d16e9043579f2b8f25d4a65efdb652de
33449	0xf17e088958f3e7e57dfbc26ad226462a76d066d6e3d938c57edb23ee48d0eee9	0xab20b6c0fc46731701a42555ab1843e8db9b0e08	0xc6dca8e9c9eb5a7eb68b04a69e63352d5d98695c	0	0x5b70ea9f	16112861	0x7fd72d7fd47bfdfe6608b2f264fe1748d16e9043579f2b8f25d4a65efdb652de
33453	0x49a8726ae0564224b32bf1e8adfb4dbda156f4ae5f52de598e228cc6a94da08a	0xa910f92acdaf488fa6ef02174fb86208ad7722ba	0xdac17f958d2ee523a2206206994597c13d831ec7	0	0xa9059cbb000000000000000000000000c720a2a9086be99420d49a6c6667e90ea61d833d00000000000000000000000000000000000000000000000000000000013de905	16112861	0x7fd72d7fd47bfdfe6608b2f264fe1748d16e9043579f2b8f25d4a65efdb652de
33454	0xd8713e21563bef55ab88ab7bf689a6f5903a82deeed5fedc4c23f3ff66ab1e5e	0xe95f6604a591f6ba33accb43a8a885c9c272108c	0x9d77cf36ebe96c1c7bb4b45876f56493a0153705	1.02e+19	0x	16112861	0x7fd72d7fd47bfdfe6608b2f264fe1748d16e9043579f2b8f25d4a65efdb652de
33456	0xd3a509f5b75e5f8c38c5e10222a6de9b98f020ac4472ba524573ecc8e55db632	0x2865ec116a7742a0f3a0cad741f994e2c01ee6dc	0x00000000006c3852cbef3e08e8df289169ede581	3e+16	0xfb0f3ee1000000000000000000000000000000000000000000000000000000000000002000000000000000000000000000000000000000000000000000000000000000000000000000000000000000000000000000000000000000000000000000000000000000000000000000000000000000000000000000000000005fec5b60ef8000000000000000000000000000513c0b27708461939c2a9867211add21eb0db1e6000000000000000000000000004c00500000ad104d7dbd00e3ae0a5c00560c0000000…	16112861	0x7fd72d7fd47bfdfe6608b2f264fe1748d16e9043579f2b8f25d4a65efdb652de
33457	0x775ef0e140d01c2e46e14555894f53a7f28d2e23776506bda561fe5a7916cd7f	0x1be210e7990eff6c07cb8cadcb9d077063ac3614	0x640abb70796247caae3cd7d0bda94369c270641b	2100000000000000	0x	16112861	0x7fd72d7fd47bfdfe6608b2f264fe1748d16e9043579f2b8f25d4a65efdb652de
33461	0x6f3bcab8c5a591e143bb47c1c201ef0cc3101c1b8d4135cb677bb72a4e4f929e	0xd659acc9ba0a7a55e17609cd4e26d0e52ecdd852	0x9d357087f5320cc3a58220c6d0c16771565920a9	9.93e+16	0x	16112861	0x7fd72d7fd47bfdfe6608b2f264fe1748d16e9043579f2b8f25d4a65efdb652de
33464	0x4c5d500b480de4f773eb8303908a7aacb5d36dd3534527527bda2f50d4f5cb9a	0xc6493a4380bccc26997aaa157b0276611b4f8e65	0x00000000006c3852cbef3e08e8df289169ede581	0	0xe7acab24000000000000000000000000000000000000000000000000000000000000008000000000000000000000000000000000000000000000000000000000000007e00000007b02230091a7ed01230072f7006a004d60a8d4e71d599b8104250f0000000000000000000000000000000000000000000000000000000000000000000000000000000000000000000000000000000000000000000000000000000000a0000000000000000000000000000000000000000000000000000000000000000100000…	16112861	0x7fd72d7fd47bfdfe6608b2f264fe1748d16e9043579f2b8f25d4a65efdb652de
33466	0xa8fc7e02e5669382d5cd9a80c660215b587566d0e31647ec71e14312bb4146af	0x22eaa950e2b1a19cd3bf9d4b8b22c87f1c031bb5	0x000000000000ad05ccc4f10045630fb830b95127	1.31e+18	0x9a1fc3a70000000000000000000000000000000000000000000000000000000000000040000000000000000000000000000000000000000000000000000000000000032000000000000000000000000000000000000000000000000000000000000000e0000000000000000000000000000000000000000000000000000000000000001bd8b3533956a411f88ef21135fc06b854afe41425a14cc35c9d042d1a9b0ab5b3664544799e6100649679ec2a00a2a350513cf9ff7ffc645a19ec486222502e3a00000…	16112861	0x7fd72d7fd47bfdfe6608b2f264fe1748d16e9043579f2b8f25d4a65efdb652de
33469	0xdb268730bd5790540acc15e956e410321ade34eb5459fac292867a546db459a3	0x32f1af178f88ad3bcaa9a7a8c214560b73d3f7b1	0x6c6ee5e31d828de241282b9606c8e98ea48526e2	0	0x095ea7b30000000000000000000000001111111254fb6c44bac0bed2854e76f90643097d00000000000000000000000000000000000000000000079f905c6fd34e800000	16112861	0x7fd72d7fd47bfdfe6608b2f264fe1748d16e9043579f2b8f25d4a65efdb652de
33470	0x316de739953dc08942973f3327f47a357adfb0f710d59e08663ed0f1a52edf86	0x6c274c0b4398f01f0e654bf2d0c46e0ce4f4781f	0xeeeec6476073778077b40a73fe32e23a9876cab4	7.95e+16	0x2b66d72e000000000000000000000000000000000000000000000000000000000000002000000000000000000000000000000000000000000000000000000000000000ee65794a68624763694f694a46557a49314e694973496d74705a434936496a64684e6a526c5a6d51314c544a694e4463744e475a6a5a6931684f4463784c5445785a6d59354f5451345954646a4f434a392e436763784d6a55334c6a673445674e56553051614a4463344d7a566c4e4445334c5449794e4463744e4467355a6931684f5…	16112861	0x7fd72d7fd47bfdfe6608b2f264fe1748d16e9043579f2b8f25d4a65efdb652de
33471	0x2f6cd0900d83987a54667a1e539dee2b5acafaa255a20909913faaaffad5401a	0x7a67e5b8b8c50788d96867699a21391ae12a2e8b	0xc02aaa39b223fe8d0a0e5c4f27ead9083c756cc2	0	0xa9059cbb000000000000000000000000bf83e722016c35ac23273dac7bac63708227178d000000000000000000000000000000000000000000000000000012309ce54000	16112861	0x7fd72d7fd47bfdfe6608b2f264fe1748d16e9043579f2b8f25d4a65efdb652de
33474	0x625f1e8754f4cd4aa20e21cba3ebce602b0fdee9d851711d090862e2e72799d1	0x28c6c06298d514db089934071355e5743bf21d60	0xfe24a602a28e0dc67a02c689888a42566e77e2f4	1.21e+17	0x	16112861	0x7fd72d7fd47bfdfe6608b2f264fe1748d16e9043579f2b8f25d4a65efdb652de
33476	0x62dfa9154070e63dd8b334293d9a14deb5f84757f7e36fd8cedd3072626c1acb	0x9b4879f5feba84e49cba274a060f9e310682f049	0x1111111254eeb25477b68fb85ed929f73a960582	3e+16	0x0502b1c50000000000000000000000000000000000000000000000000000000000000000000000000000000000000000000000000000000000000000006a94d74f4300000000000000000000000000000000000000000000000000000000019f3d6a28c40000000000000000000000000000000000000000000000000000000000000080000000000000000000000000000000000000000000000000000000000000000100000000000000003b6d0340c3dfd66a797f6c8cd3a0a9e66a58a06101221681e26b9…	16112861	0x7fd72d7fd47bfdfe6608b2f264fe1748d16e9043579f2b8f25d4a65efdb652de
33477	0xba8c996f2912466326ae4def21336e71c8940c8a99eb0e12981115ebf2b8e080	0x1be210e7990eff6c07cb8cadcb9d077063ac3614	0x1d9b15c1706dd6e527dc26fa7de2eef7e1860e2a	2100000000000000	0x	16112861	0x7fd72d7fd47bfdfe6608b2f264fe1748d16e9043579f2b8f25d4a65efdb652de
33479	0xff3e1bf5bfcde9208648b221be6f003a204ae86fa124d1fa4c650ccb9d3f6a38	0x23c53da3bbf15a35e38524d1f566434b96ff35cb	0x4995ff1c49baa6576029b7398479068ba664449c	0	0xa22cb4650000000000000000000000001e0049783f008a0085193e00003d00cd54003c710000000000000000000000000000000000000000000000000000000000000001	16112861	0x7fd72d7fd47bfdfe6608b2f264fe1748d16e9043579f2b8f25d4a65efdb652de
33480	0x4b0f33e2cc62d00a74f229fce89102c36ba10e4ad7da79c29e9706614169ae9f	0xa2dccb55c81efd4b298663874115e9648b953bcc	0x06450dee7fd2fb8e39061434babcfc05599a6fb8	0	0x9ff054df00000000000000000000000000000000000000000000000000000000000001af	16112861	0x7fd72d7fd47bfdfe6608b2f264fe1748d16e9043579f2b8f25d4a65efdb652de
33481	0xeed1e20b9d2eef4a204a865dbf462705e0b242e30f60cd3688997bc4cd338789	0xd2107b993ed7e0ea49b38708368f1ab101bb3cdf	0xcac0f1a06d3f02397cfb6d7077321d73b504916e	1e+16	0x	16112861	0x7fd72d7fd47bfdfe6608b2f264fe1748d16e9043579f2b8f25d4a65efdb652de
33483	0xf658662bdfe016e229759c532bb827c3d69fda9d361dd8ead9929f93d25d709d	0x1be210e7990eff6c07cb8cadcb9d077063ac3614	0x82a9de6627d8929418285be95f222c71dcf6b3ec	2100000000000000	0x	16112861	0x7fd72d7fd47bfdfe6608b2f264fe1748d16e9043579f2b8f25d4a65efdb652de
33485	0xfe184f3c28eb0452de2b696dca81901b6ebfd0ea077bdaab023ce272cee2f535	0xe5da1092871a3a5034ae3c3d1d091bc4ea6b5ca9	0x68b3465833fb72a70ecdf485e0e4c7bd8665fc45	0	0x5ae401dc00000000000000000000000000000000000000000000000000000000638cdc3b0000000000000000000000000000000000000000000000000000000000000040000000000000000000000000000000000000000000000000000000000000000100000000000000000000000000000000000000000000000000000000000000200000000000000000000000000000000000000000000000000000000000000104472b43f3000000000000000000000000000000000000000000009d63f0d4750287a99…	16112861	0x7fd72d7fd47bfdfe6608b2f264fe1748d16e9043579f2b8f25d4a65efdb652de
33487	0xcc2c55dcbba049fa1bb6a3464f0b0d99d3dba6d9e9de218c349aad3c3f9fa21a	0x963737c550e70ffe4d59464542a28604edb2ef9a	0x19d2089291d7f75e75bfdab1b7df83c115884791	2.01e+17	0x	16112861	0x7fd72d7fd47bfdfe6608b2f264fe1748d16e9043579f2b8f25d4a65efdb652de
33489	0xb01d7b67c40e2feff65400543a3f613c75214c2ec79f6787b344a98ad7c5732f	0x5c6edf201ac2db0b169288793dc2b5fb36a89f1e	0xc6dca8e9c9eb5a7eb68b04a69e63352d5d98695c	0	0xa22cb4650000000000000000000000001e0049783f008a0085193e00003d00cd54003c710000000000000000000000000000000000000000000000000000000000000001	16112861	0x7fd72d7fd47bfdfe6608b2f264fe1748d16e9043579f2b8f25d4a65efdb652de
33492	0x82e28411ecb972f5ef72f026e6681b837ec85b97cbbe08fc80e0ab1536a4e0ec	0x7403b71bb94c996569260397210ab98f1a743c56	0x4da27a545c0c5b758a6ba100e3a049001de870f5	0	0xa9059cbb000000000000000000000000aab26c1d91e88dc067c3471f593a0a1612f1be380000000000000000000000000000000000000000000000005051ed0d1601fec0	16112861	0x7fd72d7fd47bfdfe6608b2f264fe1748d16e9043579f2b8f25d4a65efdb652de
33495	0x1574587edca9cb02f926af1b0718312dcb54f51c48d929a295b59983ec3d499a	0xdf7b9caa61d4a945d73046aed0983b36aa39d019	0x68b3465833fb72a70ecdf485e0e4c7bd8665fc45	0	0x5ae401dc00000000000000000000000000000000000000000000000000000000638cdc47000000000000000000000000000000000000000000000000000000000000004000000000000000000000000000000000000000000000000000000000000000020000000000000000000000000000000000000000000000000000000000000040000000000000000000000000000000000000000000000000000000000000016000000000000000000000000000000000000000000000000000000000000000e404e45…	16112861	0x7fd72d7fd47bfdfe6608b2f264fe1748d16e9043579f2b8f25d4a65efdb652de
33498	0x39b8ce985025e73ed3b8c94c0b122bf3c49d8f706d4336d41939b848ffc01995	0xeb9d0e3ba530c03d0ca581d42406b51c628c7e61	0xdac17f958d2ee523a2206206994597c13d831ec7	0	0x095ea7b3000000000000000000000000d9e1ce17f2641f24ae83637ab66a2cca9c378b9fffffffffffffffffffffffffffffffffffffffffffffffffffffffffffffffff	16112861	0x7fd72d7fd47bfdfe6608b2f264fe1748d16e9043579f2b8f25d4a65efdb652de
33499	0x543001cbcb0748766530b389fb5521d665a7227e431ba07e712c118eedd232ed	0x11b4e83bc3e9605f03e2a4c34bd09567be5aebbe	0x00000000009726632680fb29d3f7a9734e3010e2	0	0x999b6464000000000000000000000000a0b86991c6218b36c1d19d4a2e9eb0ce3606eb48000000000000000000000000def1c0ded9bec7f1a1670819833240f027b25eff00000000000000000000000000000000000000000000000000000000000000a00000000000000000000000000000000000000000000000000000000023c34600000000000000000000000000000000000000000000000000001e32b4789740000000000000000000000000000000000000000000000000000000000000000128803ba…	16112861	0x7fd72d7fd47bfdfe6608b2f264fe1748d16e9043579f2b8f25d4a65efdb652de
33501	0x5160379f193040d791fcc9a972c78b7755bf4fa418c2a44dcce1bc9522fd767f	0xd8a87ef6a7179c6bcc617eb32c3462ed7eb9e1cd	0x44e94034afce2dd3cd5eb62528f239686fc8f162	3.33e+16	0xfa2b068f000000000000000000000000d3da7776569b24260a073e9dea575bc7208fb50b00000000000000000000000000000000000000000000000000000000655250f0000000000000000000000000000000000000000000000000000000000000000000000000000000000000000000000000000000000000000000000000000000a0000000000000000000000000d8a87ef6a7179c6bcc617eb32c3462ed7eb9e1cd0000000000000000000000000000000000000000000000000000000000000000	16112861	0x7fd72d7fd47bfdfe6608b2f264fe1748d16e9043579f2b8f25d4a65efdb652de
33502	0xfe55384033cfafe35f789c7e3b3cf436fcc9c1d2e2b7ded8c6513146a9e006e3	0x8d483613e70d287e573351bcecef4bac15ce7c00	0x617dee16b86534a5d792a4d7a62fb491b544111e	0	0xa7f5c1040000000000000000000000004fe5b965e3bd76eff36280471030ef9b0e6e2c1d000000000000000000000000000000000000000000000000000000000000008000000000000000000000000000000000000000000000000000000000000002600000000000000000000000000000000000000000000000000000000000000620000000000000000000000000b19189fb36c816f3e0f16065057b07b790998fdc000000000000000000000000eeeeeeeeeeeeeeeeeeeeeeeeeeeeeeeeeeeeeeee00000…	16112861	0x7fd72d7fd47bfdfe6608b2f264fe1748d16e9043579f2b8f25d4a65efdb652de
33503	0xbacd967bc870cf520fe2432b4d813e22c6176e8ebc15280cdc24163b6395b708	0x0acdd0fefb605957dfcba4816d77c43dec3f1f79	0xe40c07afbf8c7fc66b7638dab4dbd637fd2a5c0d	3000000000000000	0x	16112861	0x7fd72d7fd47bfdfe6608b2f264fe1748d16e9043579f2b8f25d4a65efdb652de
33504	0x89505519afc0c1019db6af27540ac4dd79ed9e3aca5a7b49bc4041eee64343d5	0x76dc45d8ba66deb6e1143cd26e475e3c6840fba2	0x6b175474e89094c44da98b954eedeac495271d0f	0	0x095ea7b3000000000000000000000000c92e8bdf79f0507f65a392b0ab4667716bfe0110ffffffffffffffffffffffffffffffffffffffffffffffffffffffffffffffff	16112861	0x7fd72d7fd47bfdfe6608b2f264fe1748d16e9043579f2b8f25d4a65efdb652de
33507	0x1de442779c203a2bcc1514bcafac767d8eee19b2bf618a698af70e0ca0dd36b8	0x1be210e7990eff6c07cb8cadcb9d077063ac3614	0x9ad984403d54b7b8978d44ddfa85cbab25f34559	2100000000000000	0x	16112861	0x7fd72d7fd47bfdfe6608b2f264fe1748d16e9043579f2b8f25d4a65efdb652de
33508	0x227ae62b86736453d4ddcd7a1d41780da755e77fd8e8a98c53c9827a0fa00775	0xf7858da8a6617f7c6d0ff2bcafdb6d2eedf64840	0x0c6bbf3cb953fc4cfc4d692f157102f1ac518488	1.44e+16	0x	16112861	0x7fd72d7fd47bfdfe6608b2f264fe1748d16e9043579f2b8f25d4a65efdb652de
33510	0xd654594dd4847d0b656a1290d2825200337c920c0bb4209a2243f66f272c3e01	0x00e484da1156202e9dd341ad7ea9c908bb919e96	0xeeeec6476073778077b40a73fe32e23a9876cab4	7.95e+16	0x2b66d72e000000000000000000000000000000000000000000000000000000000000002000000000000000000000000000000000000000000000000000000000000000ee65794a68624763694f694a46557a49314e694973496d74705a434936496a64684e6a526c5a6d51314c544a694e4463744e475a6a5a6931684f4463784c5445785a6d59354f5451345954646a4f434a392e436763784d6a55334c6a673445674e56553051614a4759345932497a596a63304c5452694e444d744e4456684d7930354f4…	16112861	0x7fd72d7fd47bfdfe6608b2f264fe1748d16e9043579f2b8f25d4a65efdb652de
33511	0x54819ef257b986dd0e420ad8fa67a740ffea16fbeef5d86e5108d3701e7dd4af	0x21a31ee1afc51d94c2efccaa2092ad1028285549	0x9c354503c38481a7a7a51629142963f98ecc12d0	0	0xa9059cbb0000000000000000000000008c27aa5cd7e94546be5f6c63929dc63a29411f860000000000000000000000000000000000000000000001f94e6d1614f476f400	16112861	0x7fd72d7fd47bfdfe6608b2f264fe1748d16e9043579f2b8f25d4a65efdb652de
33512	0x1828c4095a7269190e2a8b4b5073bbd1dceada14233e0de73678f8deb75a995a	0x8d483613e70d287e573351bcecef4bac15ce7c00	0x617dee16b86534a5d792a4d7a62fb491b544111e	2e+17	0xabcffc260000000000000000000000004fe5b965e3bd76eff36280471030ef9b0e6e2c1d000000000000000000000000000000000000000000000000000000000000008000000000000000000000000000000000000000000000000000000000000002400000000000000000000000000000000000000000000000000000000000000520000000000000000000000000eeeeeeeeeeeeeeeeeeeeeeeeeeeeeeeeeeeeeeee0000000000000000000000006a6aa13393b7d1100c00a57c76c39e8b6c83504100000…	16112861	0x7fd72d7fd47bfdfe6608b2f264fe1748d16e9043579f2b8f25d4a65efdb652de
33513	0x17e1667425cce243e117841991d167a1e1d0f4dda4546f6ffa42531a6f066e97	0x4f48405ec5498ad835584c1bbb049c2e5561cfe8	0xc6dca8e9c9eb5a7eb68b04a69e63352d5d98695c	0	0x5b70ea9f	16112861	0x7fd72d7fd47bfdfe6608b2f264fe1748d16e9043579f2b8f25d4a65efdb652de
33514	0xbdadf9107e75a9920360afd91c5ead9dd9df2513b0560d92acd6887583c8ba06	0xf80666301a76b717c5da337258f2d9a0dba3322a	0x69ae3548ba63e03bac5cf80c1812f195af8b436b	1.66e+16	0x	16112861	0x7fd72d7fd47bfdfe6608b2f264fe1748d16e9043579f2b8f25d4a65efdb652de
33515	0x0bc859ca5763ffd954a67bd3b899d7b42d381a94591cb2d8a78a7c2d04d8214f	0xba88be0718a5d8e064298baecec353a94e45171a	0x68b3465833fb72a70ecdf485e0e4c7bd8665fc45	9.5e+16	0x5ae401dc00000000000000000000000000000000000000000000000000000000638cdc4700000000000000000000000000000000000000000000000000000000000000400000000000000000000000000000000000000000000000000000000000000001000000000000000000000000000000000000000000000000000000000000002000000000000000000000000000000000000000000000000000000000000000e4472b43f3000000000000000000000000000000000000000000000000015181ff25a98…	16112861	0x7fd72d7fd47bfdfe6608b2f264fe1748d16e9043579f2b8f25d4a65efdb652de
33516	0x7e0a61db4b4606c17ddd34db2ff1113dadc7d560fb8fb765246baf39e1c37c08	0xaf83d2274120adbfd70b450654953405ab1636d2	0x6ce3a30c46d1b060c497ca4128ed8c9ed16161bc	4770000000000000	0x	16112861	0x7fd72d7fd47bfdfe6608b2f264fe1748d16e9043579f2b8f25d4a65efdb652de
33518	0x23ed519d52058ca83014bf43b2b75929ed5f4e598b171d034015db2b5e0fcf55	0x7aa0426f10c7603bbfb8ceb8afb8d8c329ccfe8b	0x000000000035b5e5ad9019092c665357240f594e	0	0x00000009ef3ef76ac02aaa39b223fe8d0a0e5c4f27ead9083c756cc20000000000000000467bccd9d29f223bce8043b84e8c8b282827790f000000000000000000000000f359492d26764481002ed88bd2acae83ca50b5c9000bb8000000000000000000000000000000000002cafd4ac77376e600000000000000000000000000000000	16112861	0x7fd72d7fd47bfdfe6608b2f264fe1748d16e9043579f2b8f25d4a65efdb652de
33520	0x343182e3b79294bd0da2d1af5cb68cd36f21b468003b928b676054c3e91aba43	0x22cd4027b8af39de8eb8809588a60b8ef067ef76	0x2536dfeecb7a0397cf98edada8486254533b1afa	0	0xac9650d80000000000000000000000000000000000000000000000000000000000000020000000000000000000000000000000000000000000000000000000000000000500000000000000000000000000000000000000000000000000000000000000a0000000000000000000000000000000000000000000000000000000000000046000000000000000000000000000000000000000000000000000000000000008200000000000000000000000000000000000000000000000000000000000000be000000…	16112861	0x7fd72d7fd47bfdfe6608b2f264fe1748d16e9043579f2b8f25d4a65efdb652de
33521	0x51184d816641bcdd475fec94dd49d4be55d36ffce59f31acfc53de6d0b158651	0x1be210e7990eff6c07cb8cadcb9d077063ac3614	0x9a675c2a4ceaaa3216e16a66bc76f6faddd8c302	2100000000000000	0x	16112860	0xef3ef76a14625e5c0230ccd1fd368f3f359bd56459d6f9f63ae769e319ce8bd5
33522	0x03c73d3232f29832eb556df2d911d2e702cf4560fb051ea3220faa52c4554e73	0xf42ed7184f3bdd07b0456952f67695683afd9044	0xbe9a129909ebcb954bc065536d2bfafbd170d27a	0	0x55a2ba68000000000000000000000000b446b4c8da18fb9169571ebb8c9b0191a67c32f3000000000000000000000000a0b86991c6218b36c1d19d4a2e9eb0ce3606eb4800000000000000000000000000000000000000000000000000000000d2173cca000000000000000000000000000000000000000000000000000000002159917d	16112860	0xef3ef76a14625e5c0230ccd1fd368f3f359bd56459d6f9f63ae769e319ce8bd5
33523	0x36a167fc0aa95da7718931e3bb98287c135148672431b1372b34e1d9ae4520c7	0xfeb1797e4f6fc613e556eb62724e29a08c5ca2d9	0xe205740c11cc5b2c4be9a3bc53a96aa075c9f605	0	0xa22cb46500000000000000000000000000000000000111abe46ff893f3b2fdf1f759a8a80000000000000000000000000000000000000000000000000000000000000001	16112860	0xef3ef76a14625e5c0230ccd1fd368f3f359bd56459d6f9f63ae769e319ce8bd5
33524	0x013a010425726aab71f402f3bcc338067611b969657a6ae6fd42d582120dc2c9	0xe15933229954e55e124a54adabde9f05710149e5	0x00000000000c2e074ec69a0dfb2997ba6c7d2e1e	0	0x1896f70a543adf5c75b0c6f277f6196ea533352fab5ae796d633ea85133b43bb5a9e3a770000000000000000000000004976fb03c32e5b8cfe2b6ccb31c09ba78ebaba41	16112860	0xef3ef76a14625e5c0230ccd1fd368f3f359bd56459d6f9f63ae769e319ce8bd5
33525	0xb3bd606568b5b5fd168729494959f090c53d39b1245fe78677d0f5f5adcfc84c	0x67a91d0e355545e4342a6c233f47712218ea7fec	0x776b9904bd39eeb70c68f2ff11c5b328c55dc297	4.5e+17	0x	16112860	0xef3ef76a14625e5c0230ccd1fd368f3f359bd56459d6f9f63ae769e319ce8bd5
33526	0xf510f80b8347266306b184a5e38d6adf5e0f285ad979b2999ee4852f7141af1a	0x37b94141bca7000241b87b4b361f155197181002	0xc36cf0cfcb5d905b8b513860db0cfe63f6cf9f5c	0	0x2eb2c2d6000000000000000000000000381e840f4ebe33d0153e9a312105554594a98c42000000000000000000000000bfd295017f3b215eec48a6e1b963ba533dc97ddb00000000000000000000000000000000000000000000000000000000000000a0000000000000000000000000000000000000000000000000000000000000014000000000000000000000000000000000000000000000000000000000000001e0000000000000000000000000000000000000000000000000000000000000000400000…	16112860	0xef3ef76a14625e5c0230ccd1fd368f3f359bd56459d6f9f63ae769e319ce8bd5
33528	0xf3e3312f183f96f272e7e2bc0c659e01ed4ae005a3b625c2fe03b5c8f45b6eba	0xf5e5f687406d072c4bcccda452f426688df7a901	0x7492e30d60d96c58ed0f0dc2fe536098c620c4c0	0	0xefef39a10000000000000000000000000000000000000000000000000000000000000001	16112860	0xef3ef76a14625e5c0230ccd1fd368f3f359bd56459d6f9f63ae769e319ce8bd5
33529	0x04797d3491379eb07c505fcc9157c9177c7efff9820e8ac2f3d8cf6b389142cc	0x3a95ead303a1b545e3d7a38fb7cb3a7944b8bebd	0xd2ab811da8a521062b56a64d521d6d4fcb76bca0	6000000000000000	0x	16112860	0xef3ef76a14625e5c0230ccd1fd368f3f359bd56459d6f9f63ae769e319ce8bd5
33530	0x6ea1bb0cff80c2f6168c3568b03fbf758b4904e9cb0ea7c9bb943d2387a62553	0x56eddb7aa87536c09ccc2793473599fd21a8b17f	0xae4c8dcdaab0b253b870be542766b293164f445f	4.89e+17	0x	16112860	0xef3ef76a14625e5c0230ccd1fd368f3f359bd56459d6f9f63ae769e319ce8bd5
33532	0xe1c07bceefa5b16b84b8099d95aa1660a06c99e556f33048977f11ba27a25521	0x0b4eb75832d98c7b7478502ccaa07d6c2618c42f	0xcce996f53bd4aaa779be8a2c73f7302a8af0bfe8	2.7e+16	0x	16112860	0xef3ef76a14625e5c0230ccd1fd368f3f359bd56459d6f9f63ae769e319ce8bd5
33534	0xab24d2f7f2ff10bc76a8d3074eed58d97c99085282acc2519063bcf57b0fb0d7	0x59e178f12e71e2e8fa3eebb44e31820bc1d27a62	0x1689a089aa12d6cbbd88bc2755e4c192f8702000	1660000000000000	0x	16112860	0xef3ef76a14625e5c0230ccd1fd368f3f359bd56459d6f9f63ae769e319ce8bd5
33535	0x29445e57d5a3211a12aac70ba72f897dbe911766975b20ba9c474116b8f5b331	0x21a31ee1afc51d94c2efccaa2092ad1028285549	0x4afa6eb5962698112de0b22bc9258b332a2fe91b	2.42e+16	0x	16112860	0xef3ef76a14625e5c0230ccd1fd368f3f359bd56459d6f9f63ae769e319ce8bd5
33537	0x517343a76fa3d2d4787004379591c3e0dda08a4e81a87de65f873353a0222a3f	0xd9c5e0dd98be7ed9b8764a690f9c4edf3b99a59f	0x06450dee7fd2fb8e39061434babcfc05599a6fb8	0	0x9ff054df0000000000000000000000000000000000000000000000000000000000000102	16112860	0xef3ef76a14625e5c0230ccd1fd368f3f359bd56459d6f9f63ae769e319ce8bd5
33538	0x2b94126367333ad37158536243a3db71f99e7ea266d9415a0d5efbdea69254b1	0x3abcc6d077152898734d69bad1261c5b3997bc14	0x72817dbe268feeb3678adae98bc3295826d0e2b3	0	0x095ea7b30000000000000000000000007a250d5630b4cf539739df2c5dacb4c659f2488dffffffffffffffffffffffffffffffffffffffffffffffffffffffffffffffff	16112860	0xef3ef76a14625e5c0230ccd1fd368f3f359bd56459d6f9f63ae769e319ce8bd5
33539	0x6a462184f73a89dc1762ddd96115bd28dd74f8474e7e78550e225400bd8f3176	0xab97925eb84fe0260779f58b7cb08d77dcb1ee2b	0xdbb79226b2a0b23e73955acf6a96d0729e0335fe	8e+16	0x	16112860	0xef3ef76a14625e5c0230ccd1fd368f3f359bd56459d6f9f63ae769e319ce8bd5
33541	0xc310e2f3ddda94b091fc7adfcab192c01da0e3355c21d27149e1c84c1eb8a699	0x416299aade6443e6f6e8ab67126e65a7f606eef5	0xfb093cccc82c7dd07be59f723133f917602f591f	4.53e+17	0x	16112860	0xef3ef76a14625e5c0230ccd1fd368f3f359bd56459d6f9f63ae769e319ce8bd5
33543	0xf6af93c2a2d9c6d8a082feba5d17ba53f8786218541ef51cadffa5ab7036053c	0x1be210e7990eff6c07cb8cadcb9d077063ac3614	0x7e7fd049819daa22c34114e84e252b55232d736d	2100000000000000	0x	16112860	0xef3ef76a14625e5c0230ccd1fd368f3f359bd56459d6f9f63ae769e319ce8bd5
33544	0x822880045b7b3640a2f6c68d743cb71eac7a4b9fa84a18fcd0dc2a5863434b42	0xa273fbbbcca36c652e5c244eea0877daeeb8e995	0x7896b50b13446cbebe5d516465dc16fd4f16acee	1.68e+16	0x	16112860	0xef3ef76a14625e5c0230ccd1fd368f3f359bd56459d6f9f63ae769e319ce8bd5
33545	0x4438415bc1982ab69e7737ce86ef03bcda2d29ed53d4c93d2c6501bb3eb0fbc2	0x10d83b1a4754bc78124468325bd7748541ac262f	0x81d73743ee4fd03d006beb5a1288af49c9b76927	4.07e+16	0x	16112860	0xef3ef76a14625e5c0230ccd1fd368f3f359bd56459d6f9f63ae769e319ce8bd5
33547	0xa0bc2d4ce27844ad4adcfc79e03e1368614ddb24b261a2e85c3560c26fb4daca	0xf8bd356e3d2d2bb5c25a9add4abfb9f9c8988b3c	0x292f04a44506c2fd49bac032e1ca148c35a478c8	1.85e+17	0x	16112860	0xef3ef76a14625e5c0230ccd1fd368f3f359bd56459d6f9f63ae769e319ce8bd5
33548	0xcf2f3fe86064f1247af44066486383a5d3fcc375285cafaf1e33a469e3bc93d9	0x74bcdd2f3a6a91bd34fe6749b8b522f9ecde2e3a	0x76f4eed9fe41262669d0250b2a97db79712ad855	0	0xf17a454600000000000000000000000000000000000000000000000000000000000000c000000000000000000000000000000000000000000000000000000000000001a000000000000000000000000000000000000000000000021e19e0c9bab2d8968000000000000000000000000000000000000000000000021c798b60ad152021500000000000000000000000001d64fb0ffa8362b2e1ee7ee03929159551eab26e000000000000000000000000000000000000000000000000000000000000022000000…	16112860	0xef3ef76a14625e5c0230ccd1fd368f3f359bd56459d6f9f63ae769e319ce8bd5
33549	0xb49d6462d39bc80d0fd8d0cc69588b031fa66b0a1063b1f7fa46e3777bdf9b72	0x53eb3ea47643e87e8f25dd997a37b3b5260e7336	0xdac17f958d2ee523a2206206994597c13d831ec7	0	0xa9059cbb0000000000000000000000004e8397e52fce85b3ad122ce63498a480a13cf34c000000000000000000000000000000000000000000000000000000000510ff40	16112860	0xef3ef76a14625e5c0230ccd1fd368f3f359bd56459d6f9f63ae769e319ce8bd5
33550	0xca0130131933d8e63212989a38f2c65733a0a29c7d6cac83a054a7a8e921af73	0x3eadde4a48d0aebda37eed7076e736edac9a8b40	0x0000000099cb7fc48a935bceb9f05bbae54e8987	0	0x00000009f82cd4b7c02aaa39b223fe8d0a0e5c4f27ead9083c756cc20000000000000000a0b86991c6218b36c1d19d4a2e9eb0ce3606eb48000000000000000d228d99c4e0554a476a092703abdb3ef35c80e0d76d32939f000064000000000000000000000000000000000265520cd55c5cacb400000000000000000000000000000000	16112860	0xef3ef76a14625e5c0230ccd1fd368f3f359bd56459d6f9f63ae769e319ce8bd5
33551	0xd780a0fcbeb8549b3fbcd848eba7a5c3852ae702fff0747542dc3583aa065cf0	0xf89d7b9c864f589bbf53a82105107622b35eaa40	0x28e6b5a22313c6c942d44f28473148a6d258681b	9.64e+16	0x	16112860	0xef3ef76a14625e5c0230ccd1fd368f3f359bd56459d6f9f63ae769e319ce8bd5
33554	0xb273e1dd5aa89f7146c2fa3b94fa776ec9e1b4ada546fd8e45e646ccaffef977	0x123b5c9b3b55b14b660ff3fe69868eefd1f38698	0x0000000000c2d145a2526bd8c716263bfebe1a72	0	0x32389b7100000000000000000000000000000000000000000000000000000000000000400000007b02230091a7ed01230072f7006a004d60a8d4e71d599b8104250f0000000000000000000000000000000000000000000000000000000000000000000100000000000000000000000000000000000000000000000000000000000000200000000000000000000000000000000000000000000000000000000000000060000000000000000000000000957f8e6ad17233f57a06d1bc42f17f606121b42b00000…	16112860	0xef3ef76a14625e5c0230ccd1fd368f3f359bd56459d6f9f63ae769e319ce8bd5
33556	0x3b9c07f760df92bbd18cb353ba607660a19e4c45e032fe0398eb3869b6ba5101	0xab97925eb84fe0260779f58b7cb08d77dcb1ee2b	0xf6affff7e3c89786a326aa69cca0f37dcbe187ae	8e+16	0x	16112860	0xef3ef76a14625e5c0230ccd1fd368f3f359bd56459d6f9f63ae769e319ce8bd5
33557	0x964c8853a079f94de4cd826e176f334a0fe059a23398a6526c8d1ced838e7b7c	0x1be210e7990eff6c07cb8cadcb9d077063ac3614	0x37c083e5c98436719c54cc88554fc44c187b0444	2100000000000000	0x	16112860	0xef3ef76a14625e5c0230ccd1fd368f3f359bd56459d6f9f63ae769e319ce8bd5
33559	0xa55ee6e1aa8b82e2f3c472160b8226832e3e732977873b96591d7414867f9696	0x6081258689a75d253d87ce902a8de3887239fe80	0xc00e94cb662c3520282e6f5717214004a7f26888	0	0xa9059cbb00000000000000000000000021157e7d3a089ef3581f639f18d8d42ba884167b00000000000000000000000000000000000000000000000029e8fc4d8b0d5010	16112860	0xef3ef76a14625e5c0230ccd1fd368f3f359bd56459d6f9f63ae769e319ce8bd5
33560	0x06cbb7ca70e120d8620d6593fab3aa90e9d32f0c897864d48f8638781e081632	0xb76d912d766c75112de1c0aff6858cea02d0493d	0x76f4eed9fe41262669d0250b2a97db79712ad855	0	0xf17a454600000000000000000000000000000000000000000000000000000000000000c000000000000000000000000000000000000000000000000000000000000001a000000000000000000000000000000000000000000000000000000027ee32530000000000000000000000000000000000000000000000000000000027ee1827c80000000000000000000000001d64fb0ffa8362b2e1ee7ee03929159551eab26e000000000000000000000000000000000000000000000000000000000000022000000…	16112860	0xef3ef76a14625e5c0230ccd1fd368f3f359bd56459d6f9f63ae769e319ce8bd5
33564	0xa95777a5ff992088e04965767cff508c51e67716f3b771031de34255bd88fbdd	0x55cb1385f1ebe927c6d8847bf674b78e851150b5	0x5c991c1b6bbe603658cbfd95aeeebdfd8199f27d	9.45e+16	0x	16112860	0xef3ef76a14625e5c0230ccd1fd368f3f359bd56459d6f9f63ae769e319ce8bd5
33565	0x8ce1f6d07e438130744482b679b73b1aa3987953474467d465d9550dcbcad4b7	0x830a309b0d7ee165cfd2428a5818db190709fc41	0x974caa59e49682cda0ad2bbe82983419a2ecc400	2.98e+19	0x	16112860	0xef3ef76a14625e5c0230ccd1fd368f3f359bd56459d6f9f63ae769e319ce8bd5
33566	0x81b3cc043fe0103c5fab20f4f1815c76c4446b55201b3d7d18410cf3fe7bcd8a	0x33ddd548fe3a082d753e5fe721a26e1ab43e3598	0x703158435b868c899f1c8b6341407420ab9250a2	1.48e+17	0x	16112860	0xef3ef76a14625e5c0230ccd1fd368f3f359bd56459d6f9f63ae769e319ce8bd5
33567	0x4835c3860e22f204caae64fdf67251a460da26501650ca413f2eb26a5ddf2e4e	0x9696f59e4d72e237be84ffd425dcad154bf96976	0x27e241e6fda72eada0d91a259afa84c830020153	2.53e+16	0x	16112860	0xef3ef76a14625e5c0230ccd1fd368f3f359bd56459d6f9f63ae769e319ce8bd5
33568	0x0a130825b867569b14086726919f0ab465b1f6e8ccbb074409185ca35b506b9a	0xa9831d89c4067bf7518efbcb6351ef6dd0059f33	0xa0b86991c6218b36c1d19d4a2e9eb0ce3606eb48	0	0x23b872dd000000000000000000000000ed21618281df8d2a781fa8e1712ca497b370546a0000000000000000000000000a50acfa461129f6977c2b32c1378eb2f81d3e430000000000000000000000000000000000000000000000000000000000000000	16112860	0xef3ef76a14625e5c0230ccd1fd368f3f359bd56459d6f9f63ae769e319ce8bd5
33569	0xee6b59d2aedbcfba918afe753f8420c2cacae148f2a90e05a1f977621d926248	0x53eb3ea47643e87e8f25dd997a37b3b5260e7336	0xdac17f958d2ee523a2206206994597c13d831ec7	0	0xa9059cbb00000000000000000000000054d42b97afb6b3967dddc8cfe2798221f8b7aebe00000000000000000000000000000000000000000000000000000000077a9701	16112860	0xef3ef76a14625e5c0230ccd1fd368f3f359bd56459d6f9f63ae769e319ce8bd5
33571	0xf8e67a766613c11b2d90a2e8f877f6aba45a2d63f6b86c19c6bcd94e822dc27f	0x478da08f1203d54e12a1ab9d84c4cafd510ed347	0x7492e30d60d96c58ed0f0dc2fe536098c620c4c0	0	0xefef39a10000000000000000000000000000000000000000000000000000000000000001	16112860	0xef3ef76a14625e5c0230ccd1fd368f3f359bd56459d6f9f63ae769e319ce8bd5
33572	0xf3b5d340dee75f0232c075f2c4b6dd8272f3ca69fc2af0e5ee4678bfe8ed6c23	0x3eadde4a48d0aebda37eed7076e736edac9a8b40	0x0000000099cb7fc48a935bceb9f05bbae54e8987	0	0x00000009f82cd4b7a0b86991c6218b36c1d19d4a2e9eb0ce3606eb480100000000000000c02aaa39b223fe8d0a0e5c4f27ead9083c756cc2000000000000000000000000e0554a476a092703abdb3ef35c80e0d76d32939f00006400000000000000000000000000000000000000000d21b804af00000000000000000000000000000000	16112860	0xef3ef76a14625e5c0230ccd1fd368f3f359bd56459d6f9f63ae769e319ce8bd5
33574	0x2d265160fd1408824818b215756a3efe200c57b82ebf3286456b3b17b4eb76e9	0x82b05b9cff14fced020f9d022492fad9afce86c9	0x4e15361fd6b4bb609fa63c81a2be19d873717870	0	0x095ea7b30000000000000000000000005cbe98480a790554403694b98bff71a525907f5dffffffffffffffffffffffffffffffffffffffffffffffffffffffffffffffff	16112860	0xef3ef76a14625e5c0230ccd1fd368f3f359bd56459d6f9f63ae769e319ce8bd5
33575	0x9bcd28a136d9231519d3c2649e6317c16eb07e63a647cbc92642360779dbf639	0x3d5945f68c7e68127d2ce218b34e430fbf32f6de	0x68b3465833fb72a70ecdf485e0e4c7bd8665fc45	2.61e+16	0x5ae401dc00000000000000000000000000000000000000000000000000000000638cdc2f00000000000000000000000000000000000000000000000000000000000000400000000000000000000000000000000000000000000000000000000000000001000000000000000000000000000000000000000000000000000000000000002000000000000000000000000000000000000000000000000000000000000000e4472b43f3000000000000000000000000000000000000000000000000005ce6aec0dd6…	16112860	0xef3ef76a14625e5c0230ccd1fd368f3f359bd56459d6f9f63ae769e319ce8bd5
33576	0xebaaeafc2ad6021fe7da947481bb5a015987c68c5bb0c88c4266eba6dccd4716	0xc276cd4991bfbdaebd24eb604071b2f64f986da2	0x9ca8887d13bc4591ae36972702fdf9de2c97957f	0	0x42842e0e000000000000000000000000c276cd4991bfbdaebd24eb604071b2f64f986da2000000000000000000000000f82efd982ff5980166032f18c7082f39fb6cd32b0000000000000000000000000000000000000000000000000000000000002b10360c6ebe	16112860	0xef3ef76a14625e5c0230ccd1fd368f3f359bd56459d6f9f63ae769e319ce8bd5
33577	0x739ac93aa06927c7a01e16b8789a7441e334c21d9de134a8853593faa8ec25f2	0xeca2e2d894d19778939bd4dfc34d2a3c45e96456	0xeca2e2d894d19778939bd4dfc34d2a3c45e96456	10757	0x	16112860	0xef3ef76a14625e5c0230ccd1fd368f3f359bd56459d6f9f63ae769e319ce8bd5
33578	0xc039b91d88c641498d035e58a1bd83129327073ba204664dd1fc3e1317deb55a	0x00bdb5699745f5b860228c8f939abf1b9ae374ed	0x1522900b6dafac587d499a862861c0869be6e428	0	0x391252150000000000000000000000003e78a4eb6df44ef6fb65b52e057269cf23ec88bd00000000000000000000000000000000000000000000000009c531249878fc0000000000000000000000000000000000000000000000000000000000000000c00000000000000000000000000000000000000000000000000000000063960fbd00000000000000000000000000000000000000000000000000000000000ff0fa00000000000000000000000000000000000000000000000000000000000000e000000…	16112860	0xef3ef76a14625e5c0230ccd1fd368f3f359bd56459d6f9f63ae769e319ce8bd5
33579	0xf6f15abe3984fea87c3b2655d4801eced9865c8fd47a9fa89f82dbacf4092d12	0x73361988ec599df4818412b3acc680bec0e5f853	0x619f793e2d7e077986d06630c11c6c0563eb28e6	2500000000000000	0x8e77fa290000000000000000000000000000000000000000000000000000000000000012000000000000000000000000000000000000000000000000000000000000000400000000000000000000000000000000000000000000000000000000000000000000000000000000000000000000000000000000000000000000000000000000	16112860	0xef3ef76a14625e5c0230ccd1fd368f3f359bd56459d6f9f63ae769e319ce8bd5
33580	0x1b78791bfdf2e4401786e61a329f1e8b5d9f9243b55473ecc527f5b6b08e4105	0x7c5dc4edab6b9f068a260ad21bd4a2a7a073a997	0x68b3465833fb72a70ecdf485e0e4c7bd8665fc45	0	0x5ae401dc00000000000000000000000000000000000000000000000000000000638cdc3b000000000000000000000000000000000000000000000000000000000000004000000000000000000000000000000000000000000000000000000000000000020000000000000000000000000000000000000000000000000000000000000040000000000000000000000000000000000000000000000000000000000000016000000000000000000000000000000000000000000000000000000000000000e4472b4…	16112860	0xef3ef76a14625e5c0230ccd1fd368f3f359bd56459d6f9f63ae769e319ce8bd5
33583	0x24b6fff77467be6f5198c57fb60a2dcdeb4d799be25dd4e135da4e4ed21cb04a	0x1be210e7990eff6c07cb8cadcb9d077063ac3614	0x940bcf95da69b67b15f3eea5c7b9b4ffb7cf0c16	2100000000000000	0x	16112860	0xef3ef76a14625e5c0230ccd1fd368f3f359bd56459d6f9f63ae769e319ce8bd5
33584	0x01a0e1a0cb6f10ccefd931b5412e467dc6093c23e3337d4ad4aa1c1ab4a96c04	0xf1300cc9c2cf347f7902742fec4df9dba952fd7b	0x88f1a66a0c0de067092162b9df8f63cc0f5fefb4	779000000000000	0x	16112860	0xef3ef76a14625e5c0230ccd1fd368f3f359bd56459d6f9f63ae769e319ce8bd5
33585	0xe5fc27ce232a9a9da3dec9dd77d9900e34fbb1217bf3e3676d8ba8087c9c0224	0x1be210e7990eff6c07cb8cadcb9d077063ac3614	0x6f7eecc1bb0368d82118f963d4349d05a3d6d2f3	2100000000000000	0x	16112860	0xef3ef76a14625e5c0230ccd1fd368f3f359bd56459d6f9f63ae769e319ce8bd5
33586	0xac36162b22ba6ab89a8ce5204b50a151bb205540ee5dfb2fa828907013950d27	0x1be210e7990eff6c07cb8cadcb9d077063ac3614	0x61c3074344930837697c612d13275d81f8be4bde	2100000000000000	0x	16112860	0xef3ef76a14625e5c0230ccd1fd368f3f359bd56459d6f9f63ae769e319ce8bd5
33587	0xec40e85fa8d46f5690f73d667f12e3979fd18ce0a47a47aa2782225b327231dd	0x178acfe67eef63598a505b8ee327c91f0fff40c3	0x286bda1413a2df81731d4930ce2f862a35a609fe	0	0xa9059cbb000000000000000000000000f5e59aee1eeadf7d992e920beb218ac8f473011b00000000000000000000000000000000000000000000007e6b004c88d2f00000	16112860	0xef3ef76a14625e5c0230ccd1fd368f3f359bd56459d6f9f63ae769e319ce8bd5
33588	0x0ba518ce6cb301b37f5e2cefa3fd4c32fdd15e9ad56f719d55f96959d0f9ee41	0xab97925eb84fe0260779f58b7cb08d77dcb1ee2b	0x9e17a0458c541e8099a631695f078fd3f1584eea	8e+16	0x	16112860	0xef3ef76a14625e5c0230ccd1fd368f3f359bd56459d6f9f63ae769e319ce8bd5
33589	0xcabb281ce77b0fbb0801d12432572be294420f2123d9255bb0350b6f2bf99831	0xc7546e841ff0fe57c0c56ad5a86437ae58a84375	0x72817dbe268feeb3678adae98bc3295826d0e2b3	0	0x095ea7b30000000000000000000000007a250d5630b4cf539739df2c5dacb4c659f2488dffffffffffffffffffffffffffffffffffffffffffffffffffffffffffffffff	16112860	0xef3ef76a14625e5c0230ccd1fd368f3f359bd56459d6f9f63ae769e319ce8bd5
33590	0x2cb937c24998459453582d657fef749315624e8ffbc16fcb6eef6e4a3448dae5	0x23c53da3bbf15a35e38524d1f566434b96ff35cb	0xc02aaa39b223fe8d0a0e5c4f27ead9083c756cc2	0	0x095ea7b30000000000000000000000001e0049783f008a0085193e00003d00cd54003c71ffffffffffffffffffffffffffffffffffffffffffffffffffffffffffffffff	16112860	0xef3ef76a14625e5c0230ccd1fd368f3f359bd56459d6f9f63ae769e319ce8bd5
33591	0x00d0344cd6f194874f7422609a13d364b0a9675d4e2fe3ce7ddf6b1d5fbe9a93	0x18f3c87f1f70f03e6ea8afa5f85f22db7600e37b	0x23a0cb7c5370c05032adc6da65fa73ae1dc6295e	2.83e+17	0x	16112860	0xef3ef76a14625e5c0230ccd1fd368f3f359bd56459d6f9f63ae769e319ce8bd5
33593	0xf4659d3c8f63f338ca948c93300fac5ff2bcb752166486400988fb17405ddcac	0x53eb3ea47643e87e8f25dd997a37b3b5260e7336	0xdac17f958d2ee523a2206206994597c13d831ec7	0	0xa9059cbb00000000000000000000000030426f565b3b3ff82e4c8377f17d829dde00f80e0000000000000000000000000000000000000000000000000000000008f1aaa3	16112860	0xef3ef76a14625e5c0230ccd1fd368f3f359bd56459d6f9f63ae769e319ce8bd5
33597	0x36f3f8185b2c17d6c58b8fe23ad84add6d30cda8598fed4da25caf5b6a1069d5	0xc9f5296eb3ac266c94568d790b6e91eba7d76a11	0xef7c5482e82d56b161b61111bb10d68080880efd	1.4e+16	0x	16112860	0xef3ef76a14625e5c0230ccd1fd368f3f359bd56459d6f9f63ae769e319ce8bd5
33598	0xc78203f1d19f59b4908388b011c0bd6c55b10ee06a2abdcd7081a901bcf96986	0x4976a4a02f38326660d17bf34b431dc6e2eb2327	0xac1b8a167897bad81add2ed71bc7d1a91466af21	4.72e+18	0x	16112860	0xef3ef76a14625e5c0230ccd1fd368f3f359bd56459d6f9f63ae769e319ce8bd5
33600	0x4711ce1a933c472e155edaa46f714c30d21dd638824a8b0c9e88658c44c6849c	0xce27fc71139d02f9a3d5cc1356add185750660ac	0xb64ef51c888972c908cfacf59b47c1afbc0ab8ac	0	0xa9059cbb000000000000000000000000955c45eb7c70bbcad19c6ba0b8d07926ef36e58800000000000000000000000000000000000000000000000000000001e875c6c0	16112860	0xef3ef76a14625e5c0230ccd1fd368f3f359bd56459d6f9f63ae769e319ce8bd5
33601	0x31496a5f06056c99edab9549e0adb856b73ff0ba6a3e5c5ede32d093155bfe0b	0x28c6c06298d514db089934071355e5743bf21d60	0x9f8f72aa9304c8b593d555f12ef6589cc3a579a2	0	0xa9059cbb00000000000000000000000009c058e919b8923a24a4677a1ef267e5d8e4084e00000000000000000000000000000000000000000000000006e117b2a35f1400	16112860	0xef3ef76a14625e5c0230ccd1fd368f3f359bd56459d6f9f63ae769e319ce8bd5
33602	0x7e935476e4cd269e59ea89e392932071429044b02e556fbbbb4d39147e9acf38	0x475b0b7aab3d872aaa159eceecc185a77b5ea9ba	0xe2fe530c047f2d85298b07d9333c05737f1435fb	0	0x4c5f7f540000000000000000000000000000000000000000000000000000000000003e0e000000000000000000000000000000000000000000000000000000000000dead	16112860	0xef3ef76a14625e5c0230ccd1fd368f3f359bd56459d6f9f63ae769e319ce8bd5
33603	0xa09eb06abb22c837bec99b79f181dd1e8714e393549761e71f4cde508caf1735	0x48c04ed5691981c42154c6167398f95e8f38a7ff	0xdac17f958d2ee523a2206206994597c13d831ec7	0	0xa9059cbb000000000000000000000000a305fab8bda7e1638235b054889b3217441dd64500000000000000000000000000000000000000000000000000000003877ff722	16112860	0xef3ef76a14625e5c0230ccd1fd368f3f359bd56459d6f9f63ae769e319ce8bd5
33604	0x8aa4049ea8880c22a73688457563abf4f1304cfae1754088c4b2ed21060d775d	0xc2922a77cd73669612a54368e97bfcdb2c957a6b	0x87ce074d11c0a63904691b2caf11188c17f224d0	1.98e+16	0x	16112860	0xef3ef76a14625e5c0230ccd1fd368f3f359bd56459d6f9f63ae769e319ce8bd5
33605	0x31d2daac6fde27644b3137abbcc5a167ba0a8818566f668e31dd2c8f62bd374c	0xa2c13eafa8417d5ee8f1b5d50b99d42cbfe910ba	0xd6a0f1c0517b20852bb76a38d41bf73eb53f54d1	0	0xc98075390000000000000000000000000000000000000000000000000000000000000080000000000000000000000000000000000000000000000000000000000000030000000000000000000000000000000000000000000000000000000000000003e0000100000100000000000000000000000000000000000000000000000000000000000000000000000000000000000000000000000000000000000000000002600000000000000000000000b336ea4534c8e84e8b0659090eb7f42b00014ee00507010…	16112860	0xef3ef76a14625e5c0230ccd1fd368f3f359bd56459d6f9f63ae769e319ce8bd5
33606	0xf738334e1a678f681eed24f2c0a8ace4306d39d892641083dbc09bede17765dc	0x53eb3ea47643e87e8f25dd997a37b3b5260e7336	0xdac17f958d2ee523a2206206994597c13d831ec7	0	0xa9059cbb0000000000000000000000006d2983ad194aa53f8f10fb4ae938193317f266c300000000000000000000000000000000000000000000000000000000015d6d20	16112860	0xef3ef76a14625e5c0230ccd1fd368f3f359bd56459d6f9f63ae769e319ce8bd5
33607	0x9f7481e06157a4ab746d8b8565e54392f3fe75f07b45f95f2dcb5e5db0a17858	0x53eb3ea47643e87e8f25dd997a37b3b5260e7336	0xdac17f958d2ee523a2206206994597c13d831ec7	0	0xa9059cbb00000000000000000000000070276a6f36165d29d4951e5ee6ee501b9ed4adab00000000000000000000000000000000000000000000000000000000004c4b40	16112860	0xef3ef76a14625e5c0230ccd1fd368f3f359bd56459d6f9f63ae769e319ce8bd5
33609	0xa3a0a01723b26f788bf0e0574d969cef023b0b927af7e989a6ccd8768701e302	0x89e51fa8ca5d66cd220baed62ed01e8951aa7c40	0xdac17f958d2ee523a2206206994597c13d831ec7	0	0xa9059cbb0000000000000000000000006e7e0f8b29d01c44670c35e1dd68ccec9d15d91b0000000000000000000000000000000000000000000000000000000001e4e14c	16112860	0xef3ef76a14625e5c0230ccd1fd368f3f359bd56459d6f9f63ae769e319ce8bd5
33610	0xc0c9e804c69c6552fc13bed4b350857efff134a3725c80fc41b7da6b288d3f13	0x21a31ee1afc51d94c2efccaa2092ad1028285549	0xa1d0e215a23d7030842fc67ce582a6afa3ccab83	0	0xa9059cbb0000000000000000000000005ef9d31556dd8430d1943f8dda11401977c42abf00000000000000000000000000000000000000000000000186f37f3e5f878000	16112860	0xef3ef76a14625e5c0230ccd1fd368f3f359bd56459d6f9f63ae769e319ce8bd5
33611	0x051e5c79dfabd231eb9915cd0fe1ff39db41315f22c6eeb3998809efcfe09890	0x0b10f3938442e4737f34548e4e932ec773fe702c	0xeeeec6476073778077b40a73fe32e23a9876cab4	7.95e+16	0x2b66d72e000000000000000000000000000000000000000000000000000000000000002000000000000000000000000000000000000000000000000000000000000000ee65794a68624763694f694a46557a49314e694973496d74705a434936496a64684e6a526c5a6d51314c544a694e4463744e475a6a5a6931684f4463784c5445785a6d59354f5451345954646a4f434a392e436763784d6a55334c6a673445674e56553051614a445531597a6b30596d4a6c4c575a695a6a67744e44526c4e6931685a5…	16112860	0xef3ef76a14625e5c0230ccd1fd368f3f359bd56459d6f9f63ae769e319ce8bd5
33612	0xd9c763debb5763a0e1cf8a5d7a0b56112fee0a8ab827be8ecffa0b9836e2cfa9	0xb3de6d8e547d7627d226fd86c8173fd37e04fdda	0x25553828f22bdd19a20e4f12f052903cb474a335	0	0x791ac94700000000000000000000000000000000000000000000000bdab530b6bb2ea93d000000000000000000000000000000000000000000000000011f88212f2febb700000000000000000000000000000000000000000000000000000000000000a0000000000000000000000000b3de6d8e547d7627d226fd86c8173fd37e04fdda00000000000000000000000000000000000000000000000000000000638cdc2f000000000000000000000000000000000000000000000000000000000000000200000…	16112860	0xef3ef76a14625e5c0230ccd1fd368f3f359bd56459d6f9f63ae769e319ce8bd5
33614	0x1bda76f89c6c259bf5675c50b0c778462ffd3ed91eb891735033a0f315a10f09	0xdfd5293d8e347dfe59e90efd55b2956a1343963d	0x2520faeb5a800b77a9824b4005a5cc0c0ad3bd10	4.98e+16	0x	16112860	0xef3ef76a14625e5c0230ccd1fd368f3f359bd56459d6f9f63ae769e319ce8bd5
33615	0x3b1c7054be38f4831ddec9b29947022c8c5cb6959334dd5a9d9ae7ee58576ad8	0xa3b3fe6404ce90a384768396a6a975336751ae64	0x18b327d8f61aa6614f0d347af4a0c2ed80166b38	3e+16	0x	16112860	0xef3ef76a14625e5c0230ccd1fd368f3f359bd56459d6f9f63ae769e319ce8bd5
33616	0xe96dc5e6a6af2795e913973e3884abfacd6d72faa928dcb0aaaa332a964442f8	0x14c4017f81675f7ac1321218d4a385a2d3117328	0xdac17f958d2ee523a2206206994597c13d831ec7	0	0xa9059cbb000000000000000000000000965713358591da5e5f1fd11e6595bccc3e64e6460000000000000000000000000000000000000000000000000000000082f67570	16112860	0xef3ef76a14625e5c0230ccd1fd368f3f359bd56459d6f9f63ae769e319ce8bd5
33617	0x5d291cff943925d8992cf1da1d417835a747ce2cde4c7a7a818c384056973e21	0x9179a0a069b0e47ccdbaa9e450ee238c1b54dd30	0xdac17f958d2ee523a2206206994597c13d831ec7	0	0xa9059cbb000000000000000000000000f33c3f5fc9aa4cbbee6fc458742c8aeaa95632870000000000000000000000000000000000000000000000000000000001401d4d	16112860	0xef3ef76a14625e5c0230ccd1fd368f3f359bd56459d6f9f63ae769e319ce8bd5
33618	0xdaa554a26d65fba2d38d3ce177e119aa37b55e84bd365e8d427a170c8d285758	0x9f85c0a1cfe3af69e3492dc8b4ebc11f79843fee	0xeeeec6476073778077b40a73fe32e23a9876cab4	7.95e+16	0x2b66d72e000000000000000000000000000000000000000000000000000000000000002000000000000000000000000000000000000000000000000000000000000000ee65794a68624763694f694a46557a49314e694973496d74705a434936496a64684e6a526c5a6d51314c544a694e4463744e475a6a5a6931684f4463784c5445785a6d59354f5451345954646a4f434a392e436763784d6a55334c6a673445674e56553051614a474979596d49784d7a52684c575577596a55744e4467785a4331684e3…	16112860	0xef3ef76a14625e5c0230ccd1fd368f3f359bd56459d6f9f63ae769e319ce8bd5
33619	0x382ae08b69a1783f01d60f3649e98c3e2c2ccb3499ba7972db267303c86f80ba	0x233d8ba26799b3cf09febbfd0360f9d642fa20d1	0xb881b839e13791d7c583881158ea9dba7237aaad	1300000000000000	0x	16112860	0xef3ef76a14625e5c0230ccd1fd368f3f359bd56459d6f9f63ae769e319ce8bd5
33621	0x91225111deb84d015810bdf5501401f7a02d822ec05083f8ed3c0d8e04806f98	0x0a4e1a270c7aaad91afbbf55fdc0e32c4771a98d	0x228a88536ec913d4a5dbfdd03e438e78f18e0513	0	0xa22cb465000000000000000000000000e228f3da618d445b0df7506af90055c4d6d52d200000000000000000000000000000000000000000000000000000000000000000	16112860	0xef3ef76a14625e5c0230ccd1fd368f3f359bd56459d6f9f63ae769e319ce8bd5
33624	0x15d29ce47c84dcaaaf9f7f9d82c4320bec7535cf365d967673c03531d70f3208	0x974caa59e49682cda0ad2bbe82983419a2ecc400	0x43ca4b5cb57ab74e85bcb7ff889f4aaebb878f91	5.64e+18	0x	16112860	0xef3ef76a14625e5c0230ccd1fd368f3f359bd56459d6f9f63ae769e319ce8bd5
33625	0xb6a93a72144f9d1e02a48c7393c672e14f0befd73b94e84b41feb974b76b58b0	0xf742ba04cf5b7dbe97bfd8a678e4b2b2ba4641e2	0x9bda2335e03b7e2b9485b1e039434107034a4738	4.57e+16	0x	16112860	0xef3ef76a14625e5c0230ccd1fd368f3f359bd56459d6f9f63ae769e319ce8bd5
33626	0xbf1a10a37901cd11b82f9be85ca5b6217444dd33bad4d53106768683bde2a689	0xc5a93444cc4da6efb9e6fc6e5d3cb55a53b52396	0xc5ed8e759485f4caf1ed6059a75f8372c06514d2	3690000000000000	0x	16112860	0xef3ef76a14625e5c0230ccd1fd368f3f359bd56459d6f9f63ae769e319ce8bd5
33627	0x422c9291c026b6943e3e4df29e9b58da0a4a2d3626f3de19383363b9aaeb0047	0x88f859db067c45b114897db6920f3e4a61a5ca66	0xb5e9f6c58f548cee53257304e287b23757effca1	4.5e+17	0x7ff36ab50000000000000000000000000000000000000000000000f983c478f8d7b38311000000000000000000000000000000000000000000000000000000000000008000000000000000000000000088f859db067c45b114897db6920f3e4a61a5ca6600000000000000000000000000000000000000000000000000000000638cdc3b0000000000000000000000000000000000000000000000000000000000000002000000000000000000000000c02aaa39b223fe8d0a0e5c4f27ead9083c756cc200000…	16112860	0xef3ef76a14625e5c0230ccd1fd368f3f359bd56459d6f9f63ae769e319ce8bd5
33628	0x6eb5e0e76eda2b54bdece85ac247b8bf864aa38f47c3c54df84615d509c5b335	0x82b05b9cff14fced020f9d022492fad9afce86c9	0x4e15361fd6b4bb609fa63c81a2be19d873717870	0	0x095ea7b30000000000000000000000005cbe98480a790554403694b98bff71a525907f5dffffffffffffffffffffffffffffffffffffffffffffffffffffffffffffffff	16112860	0xef3ef76a14625e5c0230ccd1fd368f3f359bd56459d6f9f63ae769e319ce8bd5
33629	0x45ecf15ff3385efd6c144585e9a3d2724faa19bc33397dc4f8ce6b3da9693db0	0x64623d4892b47f8374c71a7a05647e688c2df8ae	0xf4565dcb2b18ac03714743608f8b7d834e520f1d	0	0x095ea7b30000000000000000000000007a250d5630b4cf539739df2c5dacb4c659f2488dffffffffffffffffffffffffffffffffffffffffffffffffffffffffffffffff	16112860	0xef3ef76a14625e5c0230ccd1fd368f3f359bd56459d6f9f63ae769e319ce8bd5
33630	0x2fdad7b0544326c3fe5c53c41c935e512cc014a90c7d456dabcd7580f787b67d	0x642c8bc95cde2e3da25378fd30407264b26d8672	0x00000000006c3852cbef3e08e8df289169ede581	2.45e+16	0xfb0f3ee100000000000000000000000000000000000000000000000000000000000000200000000000000000000000000000000000000000000000000000000000000000000000000000000000000000000000000000000000000000000000000000000000000000000000000000000000000000000000000000000000501402b53cc000000000000000000000000000e365aba924c6105da509fca843c783132bd6c113000000000000000000000000004c00500000ad104d7dbd00e3ae0a5c00560c0000000…	16112860	0xef3ef76a14625e5c0230ccd1fd368f3f359bd56459d6f9f63ae769e319ce8bd5
33632	0x11cc8ebdbd383c531ddeac894425f99e0988892cfe6c14d4ebc2e06582033cca	0x53eb3ea47643e87e8f25dd997a37b3b5260e7336	0xdac17f958d2ee523a2206206994597c13d831ec7	0	0xa9059cbb000000000000000000000000dd546f925a5e8dfe5f775c533cc8eba1b5bc9cd30000000000000000000000000000000000000000000000000000000003197500	16112860	0xef3ef76a14625e5c0230ccd1fd368f3f359bd56459d6f9f63ae769e319ce8bd5
33635	0x1d02d970bba1e3d8bb5a52e23d5a1451d00f8ad6fec1515907dab78252b77a15	0x53eb3ea47643e87e8f25dd997a37b3b5260e7336	0xdac17f958d2ee523a2206206994597c13d831ec7	0	0xa9059cbb0000000000000000000000005590ac3743c283f12b8e8204aa152f84ee407492000000000000000000000000000000000000000000000000000000001443fd00	16112860	0xef3ef76a14625e5c0230ccd1fd368f3f359bd56459d6f9f63ae769e319ce8bd5
33636	0xe7d2939052e2a2ba12465695c59e67c9cda5c06d8989d881485fbeb106bad410	0xaf83d2274120adbfd70b450654953405ab1636d2	0xa934269aade2d535abf374c620e5b014cc00863b	4770000000000000	0x	16112860	0xef3ef76a14625e5c0230ccd1fd368f3f359bd56459d6f9f63ae769e319ce8bd5
33639	0xe0e30f0b22236699877023cdc1ed9f0c63a41a56a0bf2c4f8e80fd389db773f4	0xd2107b993ed7e0ea49b38708368f1ab101bb3cdf	0x7a250d5630b4cf539739df2c5dacb4c659f2488d	0	0x791ac947000000000000000000000000000000000000000000000000000003c3eb3ab80000000000000000000000000000000000000000000000000000c424af7f4cc90b00000000000000000000000000000000000000000000000000000000000000a0000000000000000000000000d2107b993ed7e0ea49b38708368f1ab101bb3cdf00000000000000000000000000000000000000000000000000000000638cd5bf000000000000000000000000000000000000000000000000000000000000000200000…	16112860	0xef3ef76a14625e5c0230ccd1fd368f3f359bd56459d6f9f63ae769e319ce8bd5
33640	0xfd0c173b59d4d409407fdd0aff906cf55916e640019834a17be47cf2cb8d506a	0x4195796a68e0a8b5ce452b772870a613a70df0e0	0x1111111254eeb25477b68fb85ed929f73a960582	0	0x0502b1c5000000000000000000000000f3b9569f82b18aef890de263b84189bd33ebe452000000000000000000000000000000000000000030940045e21c293bc3a5d507000000000000000000000000000000000000000000000000000000157e39258e0000000000000000000000000000000000000000000000000000000000000080000000000000000000000000000000000000000000000000000000000000000280000000000000003b6d034048d20b3e529fb3dd7d91293f80638df582ab2daa80000…	16112860	0xef3ef76a14625e5c0230ccd1fd368f3f359bd56459d6f9f63ae769e319ce8bd5
33643	0xffa8468088448d1c61849cbd4c6d8394ce437e41bc947609302b60549e57b536	0x3f239b0eac00dc2f683c19043bf2d377e3a21e3f	0x7a250d5630b4cf539739df2c5dacb4c659f2488d	1.5e+17	0x7ff36ab500000000000000000000000000000000000000000000000000000033ae6abe7700000000000000000000000000000000000000000000000000000000000000800000000000000000000000003f239b0eac00dc2f683c19043bf2d377e3a21e3f00000000000000000000000000000000000000000000000000000000638cd5bd0000000000000000000000000000000000000000000000000000000000000002000000000000000000000000c02aaa39b223fe8d0a0e5c4f27ead9083c756cc200000…	16112860	0xef3ef76a14625e5c0230ccd1fd368f3f359bd56459d6f9f63ae769e319ce8bd5
33644	0xa909c6a21c02bc1589dfbefcba708314139211b59ed73871c4421641412cff54	0x1be210e7990eff6c07cb8cadcb9d077063ac3614	0xd24f53f6bb02ffbcaf891256f3090240cd854bde	2100000000000000	0x	16112860	0xef3ef76a14625e5c0230ccd1fd368f3f359bd56459d6f9f63ae769e319ce8bd5
33647	0xb68c5b4f12f1d3b71cc8ad395e58f583ba2bc7cdb3dc4be57241466ccd0fe473	0xa21a16ec22a940990922220e4ab5bf4c2310f556	0xc384e1b1d82bc1f154ee0327f085cd45e6e1e3e4	2.32e+16	0x	16112860	0xef3ef76a14625e5c0230ccd1fd368f3f359bd56459d6f9f63ae769e319ce8bd5
33648	0x6a5d7d6104e7eb3c167a9cfb7665a04297bc646748f4e71783d1b4c2152e7405	0x0a2fbc9aa7f683ac59e15a80367f0893203cb2b4	0x8d89b6eddcf9a4db049dae034cf2f65ae4a0eb6f	1e+16	0x	16112860	0xef3ef76a14625e5c0230ccd1fd368f3f359bd56459d6f9f63ae769e319ce8bd5
33649	0x7b42a82e2a7c9b19ca5e8cb48851a8dca4eb06e33e4f6d02dfde68b42c5e9fcc	0xe2296fc4ce0c9fadbcd80e698f3735bb95de435b	0x68b3465833fb72a70ecdf485e0e4c7bd8665fc45	1.1e+17	0x5ae401dc00000000000000000000000000000000000000000000000000000000638cdc3b00000000000000000000000000000000000000000000000000000000000000400000000000000000000000000000000000000000000000000000000000000001000000000000000000000000000000000000000000000000000000000000002000000000000000000000000000000000000000000000000000000000000000e4472b43f30000000000000000000000000000000000000000000000000186cc6acd4b0…	16112860	0xef3ef76a14625e5c0230ccd1fd368f3f359bd56459d6f9f63ae769e319ce8bd5
33651	0xd8ec68b954a9accc34a1fdfd2c0a241558cc922edad2e57521954ca0ed68110d	0x53eb3ea47643e87e8f25dd997a37b3b5260e7336	0xdac17f958d2ee523a2206206994597c13d831ec7	0	0xa9059cbb00000000000000000000000045ede42370ca88b7a6e3223a59b1a682724b7eaa00000000000000000000000000000000000000000000000000000000017d7840	16112860	0xef3ef76a14625e5c0230ccd1fd368f3f359bd56459d6f9f63ae769e319ce8bd5
33653	0xa1be0a7658019b0ec641514473d012615f3e6f0c4aa828eded9db399a9f2add5	0xf2f5c73fa04406b1995e397b55c24ab1f3ea726c	0x535b918f3724001fd6fb52fcc6cbc220592990a3	3.42e+16	0x	16112860	0xef3ef76a14625e5c0230ccd1fd368f3f359bd56459d6f9f63ae769e319ce8bd5
33654	0x27d746bbb6585752062a6312d0755acbbf995f5d1f3cc0477e113398df3599e4	0x76e34d59cdbbbd3848969ebea7f7413be03d9bc4	0x941d936f42a8ceeeb7968be8d9b6ae29bac5fbb8	0	0xa22cb4650000000000000000000000001e0049783f008a0085193e00003d00cd54003c710000000000000000000000000000000000000000000000000000000000000001	16112860	0xef3ef76a14625e5c0230ccd1fd368f3f359bd56459d6f9f63ae769e319ce8bd5
33655	0x13362dc68f1fd33fb6a0a58b632d7c5862ee7955adc3619c1823cd4eb4548472	0x21a31ee1afc51d94c2efccaa2092ad1028285549	0xdac17f958d2ee523a2206206994597c13d831ec7	0	0xa9059cbb0000000000000000000000009878b8795e540285f691582044d0baf287389615000000000000000000000000000000000000000000000000000000005b96943d	16112860	0xef3ef76a14625e5c0230ccd1fd368f3f359bd56459d6f9f63ae769e319ce8bd5
33657	0x1f0641af506211566925a17f481aae3ae8a3ed43dbf4cd9401b5a66f1d5fa88c	0x1be210e7990eff6c07cb8cadcb9d077063ac3614	0x293ff840b6a2349d40bb9686054d82179312e34a	2100000000000000	0x	16112859	0xf82cd4b7c1c07ac525da57eb5c7ebb8f0ec947671399309ed38e43023e2d0c0b
33658	0xeb2b1ae2f21233be9c8a50d9d19555ff3b0742f741513e8c12f3158d30bddfcf	0xce926c7ccfff2d353256dff36fa4169eaf2f0008	0xeeeec6476073778077b40a73fe32e23a9876cab4	7.95e+16	0x2b66d72e000000000000000000000000000000000000000000000000000000000000002000000000000000000000000000000000000000000000000000000000000000ee65794a68624763694f694a46557a49314e694973496d74705a434936496a64684e6a526c5a6d51314c544a694e4463744e475a6a5a6931684f4463784c5445785a6d59354f5451345954646a4f434a392e436763784d6a55334c6a673445674e56553051614a4445334d574d7a4d7a55354c54686a5a446b744e47517a4e7931684d5…	16112859	0xf82cd4b7c1c07ac525da57eb5c7ebb8f0ec947671399309ed38e43023e2d0c0b
33659	0x3ab88ead016c3a482ed078b2268c26b2ede1ecc0b70a85c86cbcee9c39a43e88	0x63ede205d69eebb50a8c51749ffc57843dd28941	0x084b1c3c81545d370f3634392de611caabff8148	0	0xc47f00270000000000000000000000000000000000000000000000000000000000000020000000000000000000000000000000000000000000000000000000000000000c6d6f72746f6e32372e6574680000000000000000000000000000000000000000	16112859	0xf82cd4b7c1c07ac525da57eb5c7ebb8f0ec947671399309ed38e43023e2d0c0b
33660	0x2e5814867e94bc959a4f5a4ee5927a090a5fcd8377ea2dfee264ac533aa779d1	0x156352ab75d960ef970d06c83e0f291deef0d67f	0x7faf4d7ee5b041170484e3957029329999b119cb	9.78e+16	0x	16112859	0xf82cd4b7c1c07ac525da57eb5c7ebb8f0ec947671399309ed38e43023e2d0c0b
33661	0xd031e5ce856b27401a1cfb089ab9f2e25bfd0df8f95c881d6dd6676b2e24b5a6	0x1f6ffe99cb5ab9c042bf724d52062ae911779c0b	0x68b3465833fb72a70ecdf485e0e4c7bd8665fc45	0	0x5ae401dc00000000000000000000000000000000000000000000000000000000638cd77f000000000000000000000000000000000000000000000000000000000000004000000000000000000000000000000000000000000000000000000000000000020000000000000000000000000000000000000000000000000000000000000040000000000000000000000000000000000000000000000000000000000000016000000000000000000000000000000000000000000000000000000000000000e4472b4…	16112859	0xf82cd4b7c1c07ac525da57eb5c7ebb8f0ec947671399309ed38e43023e2d0c0b
33662	0x5b177079154da08097bf3f590cfa600d4dd82d7a0555bb792d1f2ed91e9a394c	0xc1dfe6c2e54b9da025a6cdb624edfb1cd6d0d2db	0x3f41480dd3b32f1cc579125f9570dccd07e07667	0	0xdd46706400000000000000000000000000000000000000000000152d02c7e14af6800000	16112859	0xf82cd4b7c1c07ac525da57eb5c7ebb8f0ec947671399309ed38e43023e2d0c0b
33663	0x3ac7596daf10f0bf696c3fb21d256fc77e081a94db08f2668690cb60a62fe084	0x1be210e7990eff6c07cb8cadcb9d077063ac3614	0x16c69fae53db092f0b857b3da4a635907465cb85	2100000000000000	0x	16112859	0xf82cd4b7c1c07ac525da57eb5c7ebb8f0ec947671399309ed38e43023e2d0c0b
33665	0x1961104323700a0048d32906495c11344a5ea85e455b267e64397c25e9bef727	0xf9c241b6ad269ac8e8cdb24a540f6cce0ec9e0dd	0x68b3465833fb72a70ecdf485e0e4c7bd8665fc45	1.93e+16	0x5ae401dc00000000000000000000000000000000000000000000000000000000638cdc2f000000000000000000000000000000000000000000000000000000000000004000000000000000000000000000000000000000000000000000000000000000020000000000000000000000000000000000000000000000000000000000000040000000000000000000000000000000000000000000000000000000000000016000000000000000000000000000000000000000000000000000000000000000e442712…	16112859	0xf82cd4b7c1c07ac525da57eb5c7ebb8f0ec947671399309ed38e43023e2d0c0b
33666	0x5167bc26ec536d7c014681c4c981d19b6cbf59400b4dda1e44aa44d3fa1baad0	0xee61f5fb0db81d3a09392375ee96f723c0620e07	0xa1d0e215a23d7030842fc67ce582a6afa3ccab83	0	0xa9059cbb000000000000000000000000e3a6efa29709649c16217316654c41bf1d17910a0000000000000000000000000000000000000000000000000de0b6b3a7640000	16112859	0xf82cd4b7c1c07ac525da57eb5c7ebb8f0ec947671399309ed38e43023e2d0c0b
33667	0xb697c05b59e6aceefbfbb9f6ccb5147b64ed489dc6a67cd9d40ad365c77c83aa	0xc6bed363b30df7f35b601a5547fe56cd31ec63da	0x514910771af9ca656af840dff83e8264ecf986ca	0	0xa9059cbb000000000000000000000000955c45eb7c70bbcad19c6ba0b8d07926ef36e58800000000000000000000000000000000000000000000000034bc4fdde27c0000	16112859	0xf82cd4b7c1c07ac525da57eb5c7ebb8f0ec947671399309ed38e43023e2d0c0b
33668	0xbcdac8875ac60ee7424c40bc35bbf816cbba87c2f7afbc08ea6dc21664b7774c	0x46340b20830761efd32832a74d7169b29feb9758	0x8437db666a05d81fb770a5339a0b337c0f9c2b59	1.67e+17	0x	16112859	0xf82cd4b7c1c07ac525da57eb5c7ebb8f0ec947671399309ed38e43023e2d0c0b
33669	0x5c4645455104d52ff2d0130e752527b0ab421223af100bf7fd2614b1b4823728	0x974caa59e49682cda0ad2bbe82983419a2ecc400	0x549de2bb17a142bf4db6c1751a9a8245d7189ad2	2.38e+16	0x	16112859	0xf82cd4b7c1c07ac525da57eb5c7ebb8f0ec947671399309ed38e43023e2d0c0b
33671	0xb5cbe7465863f875c4f585e865c3a05f72e1266eeefde0317ec2f5860cc999e7	0x3abcc6d077152898734d69bad1261c5b3997bc14	0x7a250d5630b4cf539739df2c5dacb4c659f2488d	5e+16	0x7ff36ab5000000000000000000000000000000000000000000045fecb671a0dda8cfa7f400000000000000000000000000000000000000000000000000000000000000800000000000000000000000003abcc6d077152898734d69bad1261c5b3997bc1400000000000000000000000000000000000000000000000000000000638cd5ac0000000000000000000000000000000000000000000000000000000000000002000000000000000000000000c02aaa39b223fe8d0a0e5c4f27ead9083c756cc200000…	16112859	0xf82cd4b7c1c07ac525da57eb5c7ebb8f0ec947671399309ed38e43023e2d0c0b
33672	0xf46f24de1f4548723caa9ab1dfa3d6b4d644ce28b88e277a54ff03f10133296c	0x0d0707963952f2fba59dd06f2b425ace40b492fe	0xdab396ccf3d84cf2d07c4454e10c8a6f5b008d2b	0	0xa9059cbb0000000000000000000000003692854ae1ce9a91aa0db6888105b466c767e11200000000000000000000000000000000000000000000007fbe2dafe4eaeac000	16112859	0xf82cd4b7c1c07ac525da57eb5c7ebb8f0ec947671399309ed38e43023e2d0c0b
33674	0xc934905519c2bcff1c787252de6385402519e0c2bc39b22f256052d9bc6d0cb7	0x99c60fe146534559fa9d1f6a081f4e6675f5f846	0x007933790a4f00000099e9001629d9fe7775b800	39109	0x6b0000000017de49e4139b5e338d5c3b5735a8fc497d0bbbe9f8d3d0e3d8	16112859	0xf82cd4b7c1c07ac525da57eb5c7ebb8f0ec947671399309ed38e43023e2d0c0b
33677	0xeea71a2fe07b37bc4318681a381f315e95edaca7940dce9e62aa57182d6e045b	0xc4dec83c9e5beae283bdb49e6fe6a6fc97d16451	0x70423fc4400c3dc01168ebe23f68d0f3ee9a0123	2900000000000000	0x5b6baa0d00000000000000000000000000000000aa9cc15bef22439e97bb0b75ddc2e79600000000000000000000000000000000000000000000000000000000000000600000000000000000000000000000000000000000000000000000000000f5dce20000000000000000000000000000000000000000000000000000000000000003000000000000000000000000cc7d43f9061f55ee6ab8bcd44b5ce6a1f28fc8c4000000000000000000000000000000000000000000000000000945c7fadd200000000…	16112859	0xf82cd4b7c1c07ac525da57eb5c7ebb8f0ec947671399309ed38e43023e2d0c0b
33678	0xc975a8a0322addb21391780ccbd1c322822ed7bd0eeef027a20bd9b10412de0f	0x46340b20830761efd32832a74d7169b29feb9758	0xe4f1128b15c503fdc0f5bf6d6de24dabe8a7a7a3	3.18e+16	0x	16112859	0xf82cd4b7c1c07ac525da57eb5c7ebb8f0ec947671399309ed38e43023e2d0c0b
33680	0xf2d549465ca3135d40a794419cedb2d7849dc996fec83dc81282bdb770029900	0x6887246668a3b87f54deb3b94ba47a6f63f32985	0x5e4e65926ba27467555eb562121fac00d24e9dd2	0	0xd0f893440002b44db700005f0000050000000000000000000000000000000000000800000000638cd5170000f5dca600002500000000638cd5260000f5dca600001800000000638cd5260000f5dca700001a00000000638cd5350000f5dca7789cecbd793c955b1738fe9c73ccf33c4f2152cacc4165c83c0f15420899e78c91632885428e328447a64486cc21443245a6908432660e1922bfcf4beffbe5be3ae7badd7bddf7f7fdeeff9eb3ce7af65efbd96bedb5d7b401e8e22a749e3e80585a3200f2bc1d6…	16112859	0xf82cd4b7c1c07ac525da57eb5c7ebb8f0ec947671399309ed38e43023e2d0c0b
33681	0x89a9edee2377d5fe6805017d397ada071afe56ccc80e5062587cceb8e429b503	0x99c60fe146534559fa9d1f6a081f4e6675f5f846	0x007933790a4f00000099e9001629d9fe7775b800	42425	0x70000000001726fadfc99b5e338d5c3b5735a8fc497d0bbbe9f8d3d0e3d8172401c05a6f9d569d731f747d3bfd66b1c68e54	16112859	0xf82cd4b7c1c07ac525da57eb5c7ebb8f0ec947671399309ed38e43023e2d0c0b
33683	0x5048085558e35c943b89d90776fc1d752c6648217a2938e7d59d76070b52374f	0xcf1f1d8732bfb6be3a593b1f38edb124a9a91d50	0x68b3465833fb72a70ecdf485e0e4c7bd8665fc45	5e+16	0x5ae401dc00000000000000000000000000000000000000000000000000000000638cdc2f00000000000000000000000000000000000000000000000000000000000000400000000000000000000000000000000000000000000000000000000000000001000000000000000000000000000000000000000000000000000000000000002000000000000000000000000000000000000000000000000000000000000000e404e45aaf000000000000000000000000c02aaa39b223fe8d0a0e5c4f27ead9083c756…	16112859	0xf82cd4b7c1c07ac525da57eb5c7ebb8f0ec947671399309ed38e43023e2d0c0b
33684	0x2857d30cc43a6baea50b8e6c90caa2aff7c0703f1157c2452149bd4ab903bfc9	0x4e5b2e1dc63f6b91cb6cd759936495434c7e972f	0xdac17f958d2ee523a2206206994597c13d831ec7	0	0xa9059cbb000000000000000000000000b63958974d474f199fbc984c58e77a2b215614c500000000000000000000000000000000000000000000000000000000010385e4	16112859	0xf82cd4b7c1c07ac525da57eb5c7ebb8f0ec947671399309ed38e43023e2d0c0b
33685	0x1c2b10a44c998de902c3bf2ce5325312da858a2137173de2b9d285883e4d7cdf	0x46340b20830761efd32832a74d7169b29feb9758	0xdac17f958d2ee523a2206206994597c13d831ec7	0	0xa9059cbb00000000000000000000000085ffff6f4bf7b989e71f6dc3dc03be56b224a612000000000000000000000000000000000000000000000000000000000538ab80	16112859	0xf82cd4b7c1c07ac525da57eb5c7ebb8f0ec947671399309ed38e43023e2d0c0b
33686	0xb1c6d718a728ee6eec83aa25a0c8c2d6b344691052196f1df77bbb16dd69da22	0xcbf04eac5a3443941ce6a41ff38d7e238406f0e4	0x429881672b9ae42b8eba0e26cd9c73711b891ca5	0	0xa9059cbb0000000000000000000000006cc5f688a315f3dc28a7781717a9a798a59fda7b00000000000000000000000000000000000000000000001fe5431ecaeb3bc000	16112859	0xf82cd4b7c1c07ac525da57eb5c7ebb8f0ec947671399309ed38e43023e2d0c0b
33687	0xaafd26fd20c9b0b438946db6be419039797508ebd0df18b085b9ab959fba4050	0x01c48f1fa4061301aa19b7f09b9f6a8756bf49d9	0x7a250d5630b4cf539739df2c5dacb4c659f2488d	0	0x791ac947000000000000000000000000000000000000000000020ccad6eef5a9adb9f54e000000000000000000000000000000000000000000000000002c0e9f2f639fdc00000000000000000000000000000000000000000000000000000000000000a000000000000000000000000001c48f1fa4061301aa19b7f09b9f6a8756bf49d900000000000000000000000000000000000000000000000000000000638cd78e000000000000000000000000000000000000000000000000000000000000000200000…	16112859	0xf82cd4b7c1c07ac525da57eb5c7ebb8f0ec947671399309ed38e43023e2d0c0b
33689	0xf92dc9470537c6c9d68d001b1f3bc3c9b393ac383796c3eceb2c16547860265d	0x682d01cff5a401c47a0b5cd4f6a5ade772ef0411	0x3a859b9ea4998d344547283c7ce8ebc4abb77656	0	0xa9059cbb00000000000000000000000009605baedeba88e0d51f94f52c3da3546ee2d32d0000000000000000000000000000000000000000000000000000000000000032	16112859	0xf82cd4b7c1c07ac525da57eb5c7ebb8f0ec947671399309ed38e43023e2d0c0b
33690	0xf609a093dc8b1516296c5ec8e0ba038d310dccbe20c217af9fe7ccc69bd6b89e	0x1be210e7990eff6c07cb8cadcb9d077063ac3614	0xeb589043d22b93443049603799e25519b885a5db	2100000000000000	0x	16112859	0xf82cd4b7c1c07ac525da57eb5c7ebb8f0ec947671399309ed38e43023e2d0c0b
33692	0xe51f4b04b1c55b9db1a90d6f56bf96a288a3d7024ee8de86cf65570cf8267ab9	0x46340b20830761efd32832a74d7169b29feb9758	0x51efb579521f09895c6ea8868d46883070664720	1.96e+17	0x	16112859	0xf82cd4b7c1c07ac525da57eb5c7ebb8f0ec947671399309ed38e43023e2d0c0b
33694	0xaa5ad2fe3b91f21189dcecbcb7b0c3985b0ecbbf6e7bbd6bfb12b85a12d561f7	0x3eadde4a48d0aebda37eed7076e736edac9a8b40	0x0000000099cb7fc48a935bceb9f05bbae54e8987	0	0x00000009817b0b73a0b86991c6218b36c1d19d4a2e9eb0ce3606eb480100000000000000c02aaa39b223fe8d0a0e5c4f27ead9083c756cc2000000000000000000000000e0554a476a092703abdb3ef35c80e0d76d32939f000064000000000000000000000000000000000000000009498bd67700000000000000000000000000000000	16112859	0xf82cd4b7c1c07ac525da57eb5c7ebb8f0ec947671399309ed38e43023e2d0c0b
33695	0x17c419baa183e9f60e62499f359f4ee0cc1312a4c546a34918138773bf17d7c6	0x46340b20830761efd32832a74d7169b29feb9758	0xb4c064ccdff2b8962c0259f2bab1360274dde102	1.6e+16	0x	16112859	0xf82cd4b7c1c07ac525da57eb5c7ebb8f0ec947671399309ed38e43023e2d0c0b
33696	0x1c0538fa02896484d6fb4642c9e78d70fe64aefa3ec12bd9d61273d03f70fe2f	0x6ca3c6df93a6ce33548dbf08763dbcb21e07fd21	0xdac17f958d2ee523a2206206994597c13d831ec7	0	0xa9059cbb000000000000000000000000f7f0acb92dd0fe3ce742db759caf3243a69e09a80000000000000000000000000000000000000000000000000000000000000000	16112859	0xf82cd4b7c1c07ac525da57eb5c7ebb8f0ec947671399309ed38e43023e2d0c0b
33697	0xe8769a6f9d87242dadfa146bd5909ed786499880b58e5258da66b746ed603448	0xe4f1c2157b096a7c6cde2cda4747050f32cc2edb	0x68b3465833fb72a70ecdf485e0e4c7bd8665fc45	5e+17	0x5ae401dc00000000000000000000000000000000000000000000000000000000638cdc2f00000000000000000000000000000000000000000000000000000000000000400000000000000000000000000000000000000000000000000000000000000001000000000000000000000000000000000000000000000000000000000000002000000000000000000000000000000000000000000000000000000000000000e4472b43f300000000000000000000000000000000000000000000000006f05b59d3b20…	16112859	0xf82cd4b7c1c07ac525da57eb5c7ebb8f0ec947671399309ed38e43023e2d0c0b
33699	0x23384e26ca06f8cc4da48678ea94a4f53ee644bbc7c6413cd91a48e70e82840d	0x983873529f95132bd1812a3b52c98fb271d2f679	0xed35af169af46a02ee13b9d79eb57d6d68c1749e	0	0xa9059cbb000000000000000000000000e76a97544c9653d17badfd54caed0781af9283b9000000000000000000000000000000000000000000001886fe874640c1ec0000	16112859	0xf82cd4b7c1c07ac525da57eb5c7ebb8f0ec947671399309ed38e43023e2d0c0b
33700	0xfedf76a3f9360af3181201a0a8a1661f6cf18508e2334d6956b87cf5c2bcdcdc	0xc9f5296eb3ac266c94568d790b6e91eba7d76a11	0xa0b86991c6218b36c1d19d4a2e9eb0ce3606eb48	0	0x23b872dd0000000000000000000000003e43a746922c9c51e2ffe2b74e895825dadf3efe000000000000000000000000c9f5296eb3ac266c94568d790b6e91eba7d76a110000000000000000000000000000000000000000000000000000000020b3bc10	16112859	0xf82cd4b7c1c07ac525da57eb5c7ebb8f0ec947671399309ed38e43023e2d0c0b
33701	0xce1691b8b77094ccd5c500b1151e917343544f67485f97269914b8b3631bfac8	0xbb5bc88fd6e29796c161f82f006da16f0930596b	0xff1f2b4adb9df6fc8eafecdcbf96a2b351680455	3.03e+16	0x7ff48afb0000000000000000000000000000000000000000000000000000000000000000000000000000000000000000000000000000000000000000006b937fe3cc8000000000000000000000000000bb5bc88fd6e29796c161f82f006da16f0930596b0000000000000000000000000000000000000000000000000000000000000000	16112859	0xf82cd4b7c1c07ac525da57eb5c7ebb8f0ec947671399309ed38e43023e2d0c0b
33702	0x8a94e7a7f5b60ebce823af3087f8326bff393de86f85851bf5b7147c93a73a15	0xd2c82f2e5fa236e114a81173e375a73664610998	0xd1669ac6044269b59fa12c5822439f609ca54f41	0	0x39125215000000000000000000000000bac3aba8847853d6b25b66d0385e6ba7c3aaad7c00000000000000000000000000000000000000000000000003311fc80a57000000000000000000000000000000000000000000000000000000000000000000c00000000000000000000000000000000000000000000000000000000063960fae0000000000000000000000000000000000000000000000000000000000278c0200000000000000000000000000000000000000000000000000000000000000e000000…	16112859	0xf82cd4b7c1c07ac525da57eb5c7ebb8f0ec947671399309ed38e43023e2d0c0b
33703	0x52c95b331c7dfd73b9849011832a53976b879814407af1bd6b8bfbecf21f1167	0x3d67f4ea34f70ad862ee64310e99b3cdaab41ef3	0x3819f64f282bf135d62168c1e513280daf905e06	0	0xf812b9a40000000000000000000000000000000000000000000000000000000000000009000000000000000000000000000000000000000000000000000000000005f005	16112859	0xf82cd4b7c1c07ac525da57eb5c7ebb8f0ec947671399309ed38e43023e2d0c0b
33704	0x5844c801e7e4d5b3ff9c998f79bf311b2a17bcbd517978cc912ea57076c0b174	0x6f867b07b867a277cc06d222b3a26958555578a5	0x1b79c7832ed9358e024f9e46e9c8b6f56633691b	0	0x42842e0e0000000000000000000000006f867b07b867a277cc06d222b3a26958555578a50000000000000000000000001524b7b7189708fc6c725325238c1179a3d5fe4e0000000000000000000000000000000000000000000000000000000000000579360c6ebe	16112859	0xf82cd4b7c1c07ac525da57eb5c7ebb8f0ec947671399309ed38e43023e2d0c0b
33705	0x4a16e2285296104c47d2ecf1aa87a2c369e16fb6abeceb6ea929a1249eafcf24	0x024e14fa72c351f132475f297f64521a7fae286a	0xed975db5192ab41713f0080e7306e08188e53e7f	0	0xefef39a10000000000000000000000000000000000000000000000000000000000000001	16112859	0xf82cd4b7c1c07ac525da57eb5c7ebb8f0ec947671399309ed38e43023e2d0c0b
33706	0x6440c62f022eb2c36cb6ceff3a57c1be13c529db9dcaf14e4006c7d72fed084b	0x47bc4b286e8186f8e9f155da7136a050444849c9	0x39aa39c021dfbae8fac545936693ac917d5e7563	0	0x095ea7b30000000000000000000000005714eb15a226059202cdfa1bf304167e367528620000000000000000000000000000000000000000000000000000000000000000	16112859	0xf82cd4b7c1c07ac525da57eb5c7ebb8f0ec947671399309ed38e43023e2d0c0b
33708	0xca9cd76d19c3565ad533e497551273cd6b7ae35b623e320c619ae2460fa7a2c9	0x1be210e7990eff6c07cb8cadcb9d077063ac3614	0xb9b3461b465760fe4155969a61acc92a9ce418f6	2100000000000000	0x	16112859	0xf82cd4b7c1c07ac525da57eb5c7ebb8f0ec947671399309ed38e43023e2d0c0b
33710	0x18cf0ef9acc9bd22f27cd90a9bbba469cc3d0894404f712c007da240dd0006eb	0x0ce02fa415ba65a4e96b0ae5db24965b70d05d65	0xb584d4be1a5470ca1a8778e9b86c81e165204599	4000000000000000	0xe56461ad000000000000000000000000000000000000000000000000000000000000000a0000000000000000000000000ce02fa415ba65a4e96b0ae5db24965b70d05d65	16112859	0xf82cd4b7c1c07ac525da57eb5c7ebb8f0ec947671399309ed38e43023e2d0c0b
33712	0xd0a8f658b943366d6975123efcf5290a3e9e8eb36113577538056a124491617e	0xaf83d2274120adbfd70b450654953405ab1636d2	0x650e92d34176adbf6b861c3e667f9bd09b358a96	5010000000000000	0x	16112859	0xf82cd4b7c1c07ac525da57eb5c7ebb8f0ec947671399309ed38e43023e2d0c0b
33713	0xd2668eeed2a27a08ebb252b34c9d1732977c11ef6e55504c82d7b6ed128037e2	0x46340b20830761efd32832a74d7169b29feb9758	0x776485c99334ae6bde2c6fa44ad324664677d629	2.82e+17	0x	16112859	0xf82cd4b7c1c07ac525da57eb5c7ebb8f0ec947671399309ed38e43023e2d0c0b
33714	0xa718dd11fa59dccd30633a3d53a26be7e12b80b8e182d6b08916727529d28131	0xbaafaa49277f42029cc9e6aa947e84fc3e38d8d3	0x084b1c3c81545d370f3634392de611caabff8148	0	0xc47f00270000000000000000000000000000000000000000000000000000000000000020000000000000000000000000000000000000000000000000000000000000000b6b61726c6e66742e657468000000000000000000000000000000000000000000	16112859	0xf82cd4b7c1c07ac525da57eb5c7ebb8f0ec947671399309ed38e43023e2d0c0b
33719	0xf56379e075451fb775bb4705ec67465545e6f5442a7d44c4c0b97098e7638144	0x0d0707963952f2fba59dd06f2b425ace40b492fe	0xdac17f958d2ee523a2206206994597c13d831ec7	0	0xa9059cbb000000000000000000000000d50b770be65b29007dc5a11af57fb6e98a052a0e00000000000000000000000000000000000000000000000000000000031a1a03	16112859	0xf82cd4b7c1c07ac525da57eb5c7ebb8f0ec947671399309ed38e43023e2d0c0b
33721	0x18fc6ee7868194ffa9784f0efc26e762fb390c59fd8dc374074d56fdebf136b4	0x0acdd0fefb605957dfcba4816d77c43dec3f1f79	0x29ea8e0903b018dc198e8e8571e2aecb9f3fc88d	3000000000000000	0x	16112859	0xf82cd4b7c1c07ac525da57eb5c7ebb8f0ec947671399309ed38e43023e2d0c0b
33723	0x7419609f4715270a436aae51f2dae3092c0e149b5650aa0058c47f4f32bd670e	0x13f45e0abf192a648a5b94741573ddfa869a5bad	0xe3c408bd53c31c085a1746af401a4042954ff740	0	0xa9059cbb0000000000000000000000006238872a0bd9f0e19073695532a7ed77ce93c69e00000000000000000000000000000000000000000000000000000001718c7e00	16112859	0xf82cd4b7c1c07ac525da57eb5c7ebb8f0ec947671399309ed38e43023e2d0c0b
33724	0x3ec719e6893497ca0ede8885c575d494dc39cf96c58a5e8028c373f410e3dcb2	0xe93381fb4c4f14bda253907b18fad305d799241a	0xd533a949740bb3306d119cc777fa900ba034cd52	0	0xa9059cbb0000000000000000000000000156579b428124760e4bd22839a9d5d27530602b000000000000000000000000000000000000000000000009ef9e7bd2c802cc00	16112859	0xf82cd4b7c1c07ac525da57eb5c7ebb8f0ec947671399309ed38e43023e2d0c0b
33725	0x69e8f5a405ab2588e9dbd1aa88e5af7e6a79eb4ee517d8d89b189e38e1fb4d79	0x46340b20830761efd32832a74d7169b29feb9758	0xc7b8b3e522ef1ebb3ab86dcc6c653e5020b92b15	4.6e+16	0x	16112859	0xf82cd4b7c1c07ac525da57eb5c7ebb8f0ec947671399309ed38e43023e2d0c0b
33727	0x4fcfa575394a327396ab6e2866d7528d0bdf13e43a2eee4dc20cb54dff2edb09	0xafc15ddb051cf6d2dd34c68c4ab6c64a3f91ac33	0x03cdfd100ee1faa56c73f60f8747c0257b7fe369	0	0x	16112859	0xf82cd4b7c1c07ac525da57eb5c7ebb8f0ec947671399309ed38e43023e2d0c0b
33728	0xe78bafe85e1fc2113351a58882b5b6ff7b6ae470f7d06a292a5e90d50c979c79	0xbe83e7db6c6fb4f5db4f22294faf3868ca443f2b	0xbe9ab37a414c517b2be2bfa5945665bb07379054	0	0xa9059cbb000000000000000000000000e93381fb4c4f14bda253907b18fad305d799241a00000000000000000000000000000000000000000000692ffed417524aa80000	16112859	0xf82cd4b7c1c07ac525da57eb5c7ebb8f0ec947671399309ed38e43023e2d0c0b
33730	0xaa2f40e9025108c4e2a7f3ad6658b545d42a081f5f7ea0a2a5d598f521eb6168	0xba4d9b46f263de53b2306dc89cf0bdc983b6682b	0x0f4b28d46cab209bc5fa987a92a26a5680538e45	0	0x42842e0e000000000000000000000000ba4d9b46f263de53b2306dc89cf0bdc983b6682b0000000000000000000000004716bb5f45c120065c94ba4ed16c4f3441aa9df90000000000000000000000000000000000000000000000000000000000001b0e360c6ebe	16112859	0xf82cd4b7c1c07ac525da57eb5c7ebb8f0ec947671399309ed38e43023e2d0c0b
33731	0xeb99ab5c79e662c1cf2cf028a0b496a4b86638823fc6c629a6a4566fc6204188	0x10121cb2b3f64f0a6231178336aca3e3b87d5ca5	0x049b51e531fd8f90da6d92ea83dc4125002f20ef	0	0xb31c01fb6be86d0e0056f69f0a59f5b4920a1ef743afc8302b29ceb394a6aea5f9cddc754d813df0a57343489cf69896f9afc30d6145d4097c94a7cd8d37da0d92463b61000000000000000000000000000000000000000000000000000000000000006000000000000000000000000000000000000000000000000000000000000000415f5d915b1742755e191713012795edca066b98b83b040517bf36d59a4f05ce5369e003ef8d67be7874a47dee75cbabcbeab4d2002e0b5ec4aa89bda360b75a951c000…	16112859	0xf82cd4b7c1c07ac525da57eb5c7ebb8f0ec947671399309ed38e43023e2d0c0b
33734	0x45f68eeb38140cfaa2fe0092605d83a9cfcbeb7e0e2258775168e72a2c8da3e4	0xd0d4936b75b781e23228fee283266c1e6905fc57	0x7b70695e761eb828abed8c4d506f9af3a76ef4b5	0	0x42842e0e000000000000000000000000d0d4936b75b781e23228fee283266c1e6905fc5700000000000000000000000049a606975f17ec67da1438e6be5309c112d4f4b4000000000000000000000000000000000000000000000000000000000000092a360c6ebe	16112859	0xf82cd4b7c1c07ac525da57eb5c7ebb8f0ec947671399309ed38e43023e2d0c0b
33735	0x6f34e6ec164c8e5a5a81accdee6e5506998b147c8f441b8d4c44e5122c353bb6	0x55fc2a86d36dd2a6c6bea4b34cdacf004bcff826	0xa0b86991c6218b36c1d19d4a2e9eb0ce3606eb48	0	0xa9059cbb000000000000000000000000750b044316e9df0ac35d01e0b46dad8100c413ad00000000000000000000000000000000000000000000000000000000052b9177	16112859	0xf82cd4b7c1c07ac525da57eb5c7ebb8f0ec947671399309ed38e43023e2d0c0b
33736	0xfbe9d1c6bca9f6008e560b3b438486f8296b1a2cd6ad25c0b3fe42f2264a7e33	0x9a177b003c2321203dfa13cf7e1f2e98235e0a37	0x77fbd7a41cfab09b273c12ecf3d217688fade9c5	0	0x6a761202000000000000000000000000a0b86991c6218b36c1d19d4a2e9eb0ce3606eb480000000000000000000000000000000000000000000000000000000000000000000000000000000000000000000000000000000000000000000000000000014000000000000000000000000000000000000000000000000000000000000000000000000000000000000000000000000000000000000000000000000000000000000000000000000000000000000000000000000000000000000000000000000000000…	16112859	0xf82cd4b7c1c07ac525da57eb5c7ebb8f0ec947671399309ed38e43023e2d0c0b
33741	0x1d026177bfafbb677627af2c0bc6d781d08522c17bf57c7a3b92bb8f6092cfa7	0x77068cb6c3562d669fa265a3262c22b842fd674e	0x39da41747a83aee658334415666f3ef92dd0d541	9000000000000000	0x9a2b81150000000000000000000000000000000000000000000000000000000000000020000000000000000000000000000000000000000000000000000000000000000100000000000000000000000000000000000000000000000000000000000000200000000000000000000000000000000000000000000000000000000000000004000000000000000000000000000000000000000000000000001ff973cafa8000000000000000000000000000000000000000000000000000000000000000006000000…	16112859	0xf82cd4b7c1c07ac525da57eb5c7ebb8f0ec947671399309ed38e43023e2d0c0b
33742	0x30c7eb702223184c5cf9f008558c223fb8ead958818ba0dc59364a2967a57e44	0x1be210e7990eff6c07cb8cadcb9d077063ac3614	0x543db66cf6a284173c0d7f704deb1ddadf5287e6	2100000000000000	0x	16112859	0xf82cd4b7c1c07ac525da57eb5c7ebb8f0ec947671399309ed38e43023e2d0c0b
33743	0x8b7dee609ce692ef86d0067317b3ac3720fe1bfc8e33367396416c5fab5a1e52	0xcc0f142bd3feb3dba401e581c0e30c1ac386a893	0x80c67432656d59144ceff962e8faf8926599bcf8	7300000000000000	0x	16112859	0xf82cd4b7c1c07ac525da57eb5c7ebb8f0ec947671399309ed38e43023e2d0c0b
33744	0x06b4e04cd3fad53f47c3ef5cea6b70d3214d06df8ab32fd4a08ae10c209e0827	0x21a31ee1afc51d94c2efccaa2092ad1028285549	0xbb0e17ef65f82ab018d8edd776e8dd940327b28b	0	0xa9059cbb000000000000000000000000350df9201142fd3b504d1ee93718185cd23df06f0000000000000000000000000000000000000000000000004d29168ab72c0000	16112859	0xf82cd4b7c1c07ac525da57eb5c7ebb8f0ec947671399309ed38e43023e2d0c0b
33745	0x5512b1ea9eea040d1b6b3927b8fdb87ddad71601113e8a7cbcdf9b57032ca1c5	0x6dfc34609a05bc22319fa4cce1d1e2929548c0d7	0xea9c6d3eaa664f0a6708138f6c95261053f5645a	2.51e+17	0x	16112859	0xf82cd4b7c1c07ac525da57eb5c7ebb8f0ec947671399309ed38e43023e2d0c0b
33746	0x2ab1ed9077d5f47a5c778dc84681925b6100ac60bce5b5916cd9bc539783347a	0x78c05a027d66f7b51f65962e31b2ee3de7099095	0x00000000006c3852cbef3e08e8df289169ede581	1e+19	0xfb0f3ee100000000000000000000000000000000000000000000000000000000000000200000000000000000000000000000000000000000000000000000000000000000000000000000000000000000000000000000000000000000000000000000000000000000000000000000000000000000000000000000000083d6c7aab63600000000000000000000000000007ec21bad87f164eb25987f95ed29baec55df3873000000000000000000000000004c00500000ad104d7dbd00e3ae0a5c00560c0000000…	16112859	0xf82cd4b7c1c07ac525da57eb5c7ebb8f0ec947671399309ed38e43023e2d0c0b
33748	0x1d1ecdb0e0c8ec38ce5a528243b34e9e73f2d865ae1b6495d053fe979da90bff	0xe6114e254863d369e1eb2d11a709f9e1813bdf3d	0x881d40237659c251811cec9c364ef91dc08d300c	0	0x5f5755290000000000000000000000000000000000000000000000000000000000000080000000000000000000000000a0b86991c6218b36c1d19d4a2e9eb0ce3606eb48000000000000000000000000000000000000000000000000000000006259008000000000000000000000000000000000000000000000000000000000000000c0000000000000000000000000000000000000000000000000000000000000000c307846656544796e616d6963000000000000000000000000000000000000000000000…	16112859	0xf82cd4b7c1c07ac525da57eb5c7ebb8f0ec947671399309ed38e43023e2d0c0b
33749	0xaf711c3f6d5a1572be7c2bb8e53f4f47510e6a1c5ae289ffadcd9baafce52ef4	0xaa3a2ce0d35d5d95a1d6d2dd17858cc65f473799	0x05c7a384a5565c9c075e1a7c96c2a2425a1b8d6c	3.89e+18	0x	16112859	0xf82cd4b7c1c07ac525da57eb5c7ebb8f0ec947671399309ed38e43023e2d0c0b
33750	0xbd506ce00a0fe09a6f76705af23347e43855c81ef442ce8312d810cfd06613a0	0x9b89c7cf49aaf62cfa634ce30c983307e2489bf3	0xf2e391f11cd1609679d03a1ac965b1d0432a7007	5.48e+16	0xeeb38ab400000000000000000000000000000000000000000000000000000000000000020000000000000000000000000000000000000000000000000000000000000bb8	16112859	0xf82cd4b7c1c07ac525da57eb5c7ebb8f0ec947671399309ed38e43023e2d0c0b
33752	0x0038cbf40eba33c3440d426540fecb2e8b4bd902053ca0ca4efcb615cc8e7cb8	0xc7546e841ff0fe57c0c56ad5a86437ae58a84375	0x7a250d5630b4cf539739df2c5dacb4c659f2488d	2.7e+16	0x7ff36ab500000000000000000000000000000000000000000000000000000000000000000000000000000000000000000000000000000000000000000000000000000080000000000000000000000000c7546e841ff0fe57c0c56ad5a86437ae58a8437500000000000000000000000000000000000000000000000000000000638cd5ac0000000000000000000000000000000000000000000000000000000000000002000000000000000000000000c02aaa39b223fe8d0a0e5c4f27ead9083c756cc200000…	16112859	0xf82cd4b7c1c07ac525da57eb5c7ebb8f0ec947671399309ed38e43023e2d0c0b
33755	0x8fd95cf04247d87f0f0f9e5bdb23653f741a0d0c8a262db281dfe615c47f565d	0xbdb945722952425b98ef7d9e994c7ce63b189b08	0xff1f2b4adb9df6fc8eafecdcbf96a2b351680455	5e+18	0x7ff48afb00000000000000000000000000000000000000000000000000000000000000000000000000000000000000000000000000000000000000004564902ad97d8000000000000000000000000000bdb945722952425b98ef7d9e994c7ce63b189b080000000000000000000000000000000000000000000000000000000000000000	16112859	0xf82cd4b7c1c07ac525da57eb5c7ebb8f0ec947671399309ed38e43023e2d0c0b
33757	0xa6a932c0bff86fb21482acb7b5835a30696aa7a39e2e87d93c631bf155e67961	0xb66634d2c8fd5bc7571cacd0ce44db27210605d1	0xbd98b7c22a3daf8e136d181febd05fbab97315d5	0	0xf242432a000000000000000000000000b66634d2c8fd5bc7571cacd0ce44db27210605d1000000000000000000000000724264acaa5be1465313d89ef3003405dca8860c0000000000000000000000000000000000000000000000000000000000000001000000000000000000000000000000000000000000000000000000000000000100000000000000000000000000000000000000000000000000000000000000a0000000000000000000000000000000000000000000000000000000000000000000000…	16112859	0xf82cd4b7c1c07ac525da57eb5c7ebb8f0ec947671399309ed38e43023e2d0c0b
33758	0x1b3c9f8c5af2e25ba07002b348f1e5eb873a433e6a944e960e29c7f40e54ae51	0xcad621da75a66c7a8f4ff86d30a2bf981bfc8fdd	0xb7d725753a300fed6d13f3951d890856ef0c6e30	1e+17	0x	16112859	0xf82cd4b7c1c07ac525da57eb5c7ebb8f0ec947671399309ed38e43023e2d0c0b
33759	0x59c67abf088fe89a33bdf69d1a15cd7c6a5ca5fc0ac0d5ae2ee3a4ba81ebd127	0x478da08f1203d54e12a1ab9d84c4cafd510ed347	0x7492e30d60d96c58ed0f0dc2fe536098c620c4c0	0	0xefef39a10000000000000000000000000000000000000000000000000000000000000001	16112859	0xf82cd4b7c1c07ac525da57eb5c7ebb8f0ec947671399309ed38e43023e2d0c0b
33760	0x506069a4f028f42d7fef2c14c48007515276310aa831f7744cfcaae8759ca942	0x4c660ead9d1bc5f7cc52b4df80f0010d15cf7d3f	0xc02aaa39b223fe8d0a0e5c4f27ead9083c756cc2	0	0x2e1a7d4d00000000000000000000000000000000000000000000000047305302948ec24b	16112859	0xf82cd4b7c1c07ac525da57eb5c7ebb8f0ec947671399309ed38e43023e2d0c0b
33763	0xe11f86d2d359e8cae2a60faa7d6c2758d2fa6c8d8427eed47c7288675f12d958	0xf16e9b0d03470827a95cdfd0cb8a8a3b46969b91	0xa0b86991c6218b36c1d19d4a2e9eb0ce3606eb48	0	0xa9059cbb0000000000000000000000000734228bc7a91fcfceb162d37770abc56cac39290000000000000000000000000000000000000000000000000000000049bff8a5	16112859	0xf82cd4b7c1c07ac525da57eb5c7ebb8f0ec947671399309ed38e43023e2d0c0b
33764	0x92bf6e0bf04a60c03d3dc55b353fc58ddf348289883c9928dbeced39aa2e5562	0x3a9b7d7084f9e34dd07d847206425e8a3db71add	0xe24c8123c8054fb9e8c53496948c34ea59914cdf	0	0xbba9b10c00000000000000000000000000000000000000000000000000000000000000a4000000000000000000000000a0b86991c6218b36c1d19d4a2e9eb0ce3606eb48000000000000000000000000000000000000000000000000000000000000006000000000000000000000000000000000000000000000000000000000000000010000000000000000000000000000000000000000000000000000000000000020466c61740000000000000000000000000000000000000000000000000000000000000…	16112859	0xf82cd4b7c1c07ac525da57eb5c7ebb8f0ec947671399309ed38e43023e2d0c0b
33765	0x6f59ffe1e594452aa0f9fdeeb71a861824ff6468b1880782157587b58e12cea3	0x799e8a81336adaa2e2176fd9018ec51320073393	0xe3e3231889e84f23dbd26ec0c220b0af23a95ebf	0	0xa3908e1b000000000000000000000000000000000000000000000524a7b5d4a92f800000	16112859	0xf82cd4b7c1c07ac525da57eb5c7ebb8f0ec947671399309ed38e43023e2d0c0b
33766	0x42af1095b2ab275936754d5939b25a109d55be11cb1b9d55058d3811f19294bf	0xf2439241881964006369c0e2377d45f3740f48a0	0xeeeec6476073778077b40a73fe32e23a9876cab4	7.95e+16	0x2b66d72e000000000000000000000000000000000000000000000000000000000000002000000000000000000000000000000000000000000000000000000000000000ee65794a68624763694f694a46557a49314e694973496d74705a434936496a64684e6a526c5a6d51314c544a694e4463744e475a6a5a6931684f4463784c5445785a6d59354f5451345954646a4f434a392e436763784d6a55334c6a673445674e56553051614a4449785a44557a5a6a686b4c5459785a5751744e444d324d6930354d3…	16112859	0xf82cd4b7c1c07ac525da57eb5c7ebb8f0ec947671399309ed38e43023e2d0c0b
33767	0x3a52fe07b9d951c21cf9f12dc68b4dc7d9779b4ae119b91ec85881a493eb5ee5	0xc79e97201e9916df84095ee7fa20d3e032ab7429	0xeeeec6476073778077b40a73fe32e23a9876cab4	7.95e+16	0x2b66d72e000000000000000000000000000000000000000000000000000000000000002000000000000000000000000000000000000000000000000000000000000000ee65794a68624763694f694a46557a49314e694973496d74705a434936496a64684e6a526c5a6d51314c544a694e4463744e475a6a5a6931684f4463784c5445785a6d59354f5451345954646a4f434a392e436763784d6a55334c6a673445674e56553051614a4463354d5759325a6a566b4c57526a4e5749744e4442684f4330355a5…	16112859	0xf82cd4b7c1c07ac525da57eb5c7ebb8f0ec947671399309ed38e43023e2d0c0b
33768	0x3854c5ac18e4808b03df50b92cd4a2573c9e10c6a9f240b07645c975ee128015	0xe347adc09d8f45b9a6981c94c8f22131ca5f4ce5	0x68b3465833fb72a70ecdf485e0e4c7bd8665fc45	1e+18	0x5ae401dc00000000000000000000000000000000000000000000000000000000638cd77f00000000000000000000000000000000000000000000000000000000000000400000000000000000000000000000000000000000000000000000000000000001000000000000000000000000000000000000000000000000000000000000002000000000000000000000000000000000000000000000000000000000000000e4472b43f30000000000000000000000000000000000000000000000000de0b6b3a7640…	16112859	0xf82cd4b7c1c07ac525da57eb5c7ebb8f0ec947671399309ed38e43023e2d0c0b
33769	0xe3af781dba9fd547c74cc6d43805b3d4064c33800fc410faceeff0ca1bcb9fa3	0xfbc967743b43c37c75a4868dca6d2258a5b7e55f	0x00000000006c3852cbef3e08e8df289169ede581	1770000000000000	0xfb0f3ee10000000000000000000000000000000000000000000000000000000000000020000000000000000000000000000000000000000000000000000000000000000000000000000000000000000000000000000000000000000000000000000000000000000000000000000000000000000000000000000000000005a801aaf26800000000000000000000000000941f211a032ef4680b6b906aa651bf39b0a87b66000000000000000000000000004c00500000ad104d7dbd00e3ae0a5c00560c0000000…	16112859	0xf82cd4b7c1c07ac525da57eb5c7ebb8f0ec947671399309ed38e43023e2d0c0b
33772	0xd869e373060b9239a8a9067f599ea5270a8fcb7ceac7ccd525d466c3e0220f70	0x853be46ebc444fdc049a2911758faa152b1c3906	0xff6bfb571537ae5e460b74aacdb895762af87169	4.39e+17	0x	16112859	0xf82cd4b7c1c07ac525da57eb5c7ebb8f0ec947671399309ed38e43023e2d0c0b
33773	0x10d974d24f5ec1421b29d68669758d153e6d3ca97df38006041827f0a01875a2	0x31ba88318066c95051730a877c71928b1f6b5f38	0x1111111254fb6c44bac0bed2854e76f90643097d	0	0x7c02520000000000000000000000000053222470cdcfb8081c0e3a50fd106f0d69e63f2000000000000000000000000000000000000000000000000000000000000000600000000000000000000000000000000000000000000000000000000000000180000000000000000000000000a0b86991c6218b36c1d19d4a2e9eb0ce3606eb480000000000000000000000003155ba85d5f96b2d030a4966af206230e46849cb00000000000000000000000053222470cdcfb8081c0e3a50fd106f0d69e63f2000000…	16112859	0xf82cd4b7c1c07ac525da57eb5c7ebb8f0ec947671399309ed38e43023e2d0c0b
33774	0xfca2db01f064f4ce10eb066eacb8fa4cbb236122dfb20e2a9b674408585f80b1	0x1be210e7990eff6c07cb8cadcb9d077063ac3614	0x447ac67f74ce0a31797a9baf6ae4417c9a4063af	2100000000000000	0x	16112859	0xf82cd4b7c1c07ac525da57eb5c7ebb8f0ec947671399309ed38e43023e2d0c0b
33776	0x3525ca76a954d246662e0d713608d25ed058153351e6eada363be7c85f70f6ba	0x2476c7f826339679dd3cfafcad72fa2ffa700b9d	0x68b3465833fb72a70ecdf485e0e4c7bd8665fc45	2e+16	0x5ae401dc00000000000000000000000000000000000000000000000000000000638cf13b00000000000000000000000000000000000000000000000000000000000000400000000000000000000000000000000000000000000000000000000000000001000000000000000000000000000000000000000000000000000000000000002000000000000000000000000000000000000000000000000000000000000000e4472b43f300000000000000000000000000000000000000000000000000470de4df820…	16112859	0xf82cd4b7c1c07ac525da57eb5c7ebb8f0ec947671399309ed38e43023e2d0c0b
33777	0x544f8d6584fe2b4b57294a5da611b542d43544033e8951134dfaa4113c799ed7	0xdafea492d9c6733ae3d56b7ed1adb60692c98bc5	0xe688b84b23f322a994a53dbf8e15fa82cdb71127	6.71e+16	0x	16112859	0xf82cd4b7c1c07ac525da57eb5c7ebb8f0ec947671399309ed38e43023e2d0c0b
33778	0xb7f1c53a6c636c8a87b1117347cf33cb624ad671938bd02763f4f22562378a5f	0xc77a1222f675b4142ded8998e7cb938fea1db44d	0x76f4eed9fe41262669d0250b2a97db79712ad855	0	0xf17a454600000000000000000000000000000000000000000000000000000000000000c000000000000000000000000000000000000000000000000000000000000001a0000000000000000000000000000000000000000000000001158e460913cff06000000000000000000000000000000000000000000000000115872b0bca42f0600000000000000000000000001d64fb0ffa8362b2e1ee7ee03929159551eab26e000000000000000000000000000000000000000000000000000000000000022000000…	16112859	0xf82cd4b7c1c07ac525da57eb5c7ebb8f0ec947671399309ed38e43023e2d0c0b
33780	0xfa031858ecd5210a17bbe97aa54ec3df3ee97457e7b7753823ca9cd4c5a921aa	0xd720fc3e6e36fbae705b697564b19b40aa5609fc	0x5c75c702e7c08a05e9d49cab78fc5e28b6c5c55a	0	0x095ea7b300000000000000000000000068b3465833fb72a70ecdf485e0e4c7bd8665fc45ffffffffffffffffffffffffffffffffffffffffffffffffffffffffffffffff	16112859	0xf82cd4b7c1c07ac525da57eb5c7ebb8f0ec947671399309ed38e43023e2d0c0b
33781	0x5f26f9cc09a7672e0a169e0a248b31065e1b97371d52eda0f922605a185c6b7e	0x46340b20830761efd32832a74d7169b29feb9758	0x374de6387b58be1ae604ee5618578e20ed09a177	6000000000000000	0x	16112859	0xf82cd4b7c1c07ac525da57eb5c7ebb8f0ec947671399309ed38e43023e2d0c0b
33782	0xebcbe06292b693facd0672102deda2666ab765cca8d43c7d6923f6d474e66e3c	0x20056c9bb0a0626a5b8bfe0bdbbc2d2e19cd96bf	0x9ea307dc460230e77865206326bad338a3187b9b	0	0x095ea7b300000000000000000000000068b3465833fb72a70ecdf485e0e4c7bd8665fc45ffffffffffffffffffffffffffffffffffffffffffffffffffffffffffffffff	16112859	0xf82cd4b7c1c07ac525da57eb5c7ebb8f0ec947671399309ed38e43023e2d0c0b
33783	0xd5591b783877a43af24cade105f60851d9a196ea0b8e9bb39708b89e7f4cce19	0xa46755eec0b3e335130eb494d40df5ac760238d8	0x68b3465833fb72a70ecdf485e0e4c7bd8665fc45	5e+16	0x5ae401dc00000000000000000000000000000000000000000000000000000000638cd56f00000000000000000000000000000000000000000000000000000000000000400000000000000000000000000000000000000000000000000000000000000001000000000000000000000000000000000000000000000000000000000000002000000000000000000000000000000000000000000000000000000000000000e4472b43f300000000000000000000000000000000000000000000000000b1a2bc2ec50…	16112859	0xf82cd4b7c1c07ac525da57eb5c7ebb8f0ec947671399309ed38e43023e2d0c0b
33785	0x3bf2ecbce66f03ddbe1aed535fac7e0966bef97cdd955890f830c9b08f66943a	0x557f5a10d8e637167e6eeb3e9e4baf64da5bb8c5	0xb51288949949cad824b958bc34946b77a245b7ae	0	0xa22cb4650000000000000000000000001e0049783f008a0085193e00003d00cd54003c710000000000000000000000000000000000000000000000000000000000000001	16112859	0xf82cd4b7c1c07ac525da57eb5c7ebb8f0ec947671399309ed38e43023e2d0c0b
33786	0xf4b411ce0e10dbc0b7dbdea2222be1a1caa77a86de54fff791cc9704c909d599	0x1be210e7990eff6c07cb8cadcb9d077063ac3614	0x2e44b3df6fecc18ae6d6a321bfe630684a5596f2	2100000000000000	0x	16112859	0xf82cd4b7c1c07ac525da57eb5c7ebb8f0ec947671399309ed38e43023e2d0c0b
33789	0xa872167ca09311185bbb5973a2dfc12883eca5a344c2e082efc56ca8ca68309b	0x0a4244c70bf10f1ffddaa52dd90941a3c11daf0d	0xf4565dcb2b18ac03714743608f8b7d834e520f1d	0	0x095ea7b300000000000000000000000068b3465833fb72a70ecdf485e0e4c7bd8665fc45ffffffffffffffffffffffffffffffffffffffffffffffffffffffffffffffff	16112859	0xf82cd4b7c1c07ac525da57eb5c7ebb8f0ec947671399309ed38e43023e2d0c0b
33790	0xbc865de493b053243a41239358fc1fb8adcfb7db2fcae6262a7e307c09281a2a	0x723e2da7317fd7f4519e6917d14267d895db7ddb	0x68b3465833fb72a70ecdf485e0e4c7bd8665fc45	0	0x5ae401dc00000000000000000000000000000000000000000000000000000000638cdc23000000000000000000000000000000000000000000000000000000000000004000000000000000000000000000000000000000000000000000000000000000020000000000000000000000000000000000000000000000000000000000000040000000000000000000000000000000000000000000000000000000000000014000000000000000000000000000000000000000000000000000000000000000c4f3995…	16112859	0xf82cd4b7c1c07ac525da57eb5c7ebb8f0ec947671399309ed38e43023e2d0c0b
33792	0xba6968544429dbccddf1fd9ab93a244b4b50d3b3ffc6117284fc36a9d7200552	0x0d0707963952f2fba59dd06f2b425ace40b492fe	0xdac17f958d2ee523a2206206994597c13d831ec7	0	0xa9059cbb000000000000000000000000ea0de5add6810194037c7873032609bf0a79f11700000000000000000000000000000000000000000000000000000000049dd08a	16112859	0xf82cd4b7c1c07ac525da57eb5c7ebb8f0ec947671399309ed38e43023e2d0c0b
33793	0x3eb0ea7b41729efc5a466fc3bcbad07195191afb5ff3a46417a567b8284c725b	0xb8001c3ec9aa1985f6c747e25c28324e4a361ec1	0x4d224452801aced8b2f0aebe155379bb5d594381	0	0xa9059cbb0000000000000000000000007f28de688f8863c1ad81ae566860a8bdd6293b4c000000000000000000000000000000000000000000000cb49b44ba602d800000	16112859	0xf82cd4b7c1c07ac525da57eb5c7ebb8f0ec947671399309ed38e43023e2d0c0b
33794	0xbd03df3b8c86133384803ab78e9494a79396920562fdef64c7b6385fb78907f3	0x077d360f11d220e4d5d831430c81c26c9be7c4a4	0x93585472f6b9f0c9a682eb7209c6296e5d75a8e6	1.55e+17	0x	16112859	0xf82cd4b7c1c07ac525da57eb5c7ebb8f0ec947671399309ed38e43023e2d0c0b
33795	0x02b627e783309fab1f793a88dbe514f93e986cd4d7af0704e3c91fa261294b09	0x1be210e7990eff6c07cb8cadcb9d077063ac3614	0x1faa4bd75ac92dcd017046cf927b2f975353918b	2100000000000000	0x	16112859	0xf82cd4b7c1c07ac525da57eb5c7ebb8f0ec947671399309ed38e43023e2d0c0b
33796	0xf885e98ba2366adf2e1bfc4f25fed832f78dc16bbaced089ee6127edbd3cf43b	0x80c67432656d59144ceff962e8faf8926599bcf8	0xd93ed3fd9717b22006443de6e1cd60220ddd642a	5.41e+16	0x	16112859	0xf82cd4b7c1c07ac525da57eb5c7ebb8f0ec947671399309ed38e43023e2d0c0b
33797	0x6baac33f0ec0bc81cc22ed5ed14746e21dcd083a202bad56f2f9d3d26613c29b	0xa1d8108b912edf6656f86ccd737f0c23517d74a4	0x7a70cebab21466ac3bd436af420c79d2a7fa6930	5e+16	0x	16112859	0xf82cd4b7c1c07ac525da57eb5c7ebb8f0ec947671399309ed38e43023e2d0c0b
33799	0x02c88c28cb4d444a01d201f2301848f0a1bd8ecf81b2be6879365532c933ddd9	0x1f69f435f8cb53eca0e4495f43f74ae96de75529	0x000000000000ad05ccc4f10045630fb830b95127	1.46e+16	0x9a1fc3a7000000000000000000000000000000000000000000000000000000000000004000000000000000000000000000000000000000000000000000000000000003c000000000000000000000000000000000000000000000000000000000000000e0000000000000000000000000000000000000000000000000000000000000001b2d7967f79c6dd7237b332c8519740c23b6f7c2caf116a880032311556ba653f000dae1c3782032c5dc3bb0771bd1a470cebac79059987a2a1e3af7f32601f6d400000…	16112859	0xf82cd4b7c1c07ac525da57eb5c7ebb8f0ec947671399309ed38e43023e2d0c0b
33800	0x5f2cb504c4c042a38141eec871ba55b8222c38517b0bb623fa3f3e03db77b4f3	0x3eadde4a48d0aebda37eed7076e736edac9a8b40	0x0000000099cb7fc48a935bceb9f05bbae54e8987	0	0x00000009817b0b73c02aaa39b223fe8d0a0e5c4f27ead9083c756cc20000000000000000a0b86991c6218b36c1d19d4a2e9eb0ce3606eb4800000000000000094b0a3814e0554a476a092703abdb3ef35c80e0d76d32939f0000640000000000000000000000000000000001b3ed49c6aeaccd3d00000000000000000000000000000000	16112859	0xf82cd4b7c1c07ac525da57eb5c7ebb8f0ec947671399309ed38e43023e2d0c0b
33802	0x694f979d0216fec0419704a3e3f16e954ff95f83995790908190076180b049b5	0xf3060e9c651621ca2af2d394a0402137517db3f7	0xf7b8c833567ab3fec9838832b354a1dd6be194bf	0	0xa22cb4650000000000000000000000001e0049783f008a0085193e00003d00cd54003c710000000000000000000000000000000000000000000000000000000000000001	16112859	0xf82cd4b7c1c07ac525da57eb5c7ebb8f0ec947671399309ed38e43023e2d0c0b
33805	0x6debba6471509bf6aba500f030f8a0e4bdde6af0b5fa41f641e0c5173ba9f2c4	0xe927a111b8fdc0e9d074708e25a016b286079346	0x000000000000ad05ccc4f10045630fb830b95127	8.88e+18	0x9a1fc3a70000000000000000000000000000000000000000000000000000000000000040000000000000000000000000000000000000000000000000000000000000036000000000000000000000000000000000000000000000000000000000000000e0000000000000000000000000000000000000000000000000000000000000001b2cf844d848684f5a83770e2a6d0634cc6b26a6fa12063c93ad1d50b9cfeecb772661b35feeb0ace0266846e9adf4d0f2e236a8e037c47653be33284c38f80f4f00000…	16112859	0xf82cd4b7c1c07ac525da57eb5c7ebb8f0ec947671399309ed38e43023e2d0c0b
33807	0xf66530c26293cd5085def3f6621bc44a353bdff1be8231aac17c2791d9d629f6	0xe819edaef316d4396c87a3f6157b7197869fa6f7	0x881d40237659c251811cec9c364ef91dc08d300c	1000000000000000	0x5f5755290000000000000000000000000000000000000000000000000000000000000080000000000000000000000000000000000000000000000000000000000000000000000000000000000000000000000000000000000000000000038d7ea4c6800000000000000000000000000000000000000000000000000000000000000000c000000000000000000000000000000000000000000000000000000000000000136f6e65496e6368563446656544796e616d69630000000000000000000000000000000…	16112858	0x817b0b73f46fe65cb56f7aeb8eb0a4be0c3173bc64bf9b41a304cda8fa10aeb4
33809	0xd4575609fb208490b3b73bb1fc92194165d1540f8bfde40257ce1fdd9c3726d9	0x91b56d6bee38057e62b36eb844d793bfcca7d486	0xf5e5f687406d072c4bcccda452f426688df7a901	4.4e+16	0x	16112858	0x817b0b73f46fe65cb56f7aeb8eb0a4be0c3173bc64bf9b41a304cda8fa10aeb4
33810	0xa95f44c0c416d2511b48ffcae647ad571442627c24655721d17b286f25825969	0x135805de1ef7a0a087b77db603e148338b7d8528	0xbc027d0f86c7898dbf88a1830f36254e0bf9db59	0	0x2db115440000000000000000000000000000000000000000000000000000000000000001	16112858	0x817b0b73f46fe65cb56f7aeb8eb0a4be0c3173bc64bf9b41a304cda8fa10aeb4
33812	0x5d25c343247815db1aea7dde4d4bac67c38dce6c8923dfee41657aafefeba643	0x5f0df4ae784db40b2d5460aa4415a662527e43cf	0xed77777586d73c58eb4d6bebdf9c85c2d5f56c2d	0	0xb00fda020009006a0102000000000000000000017b44e50a5499f00200000000000010214a7497433500005dfd5cc00d49d7fdeb2a3bb5e8abebd6f9a0ad3f000000010000000000000001896375ecef3100c139d8450177c0b8c3788608518687b585f7ae5a000000010300000000000000000001150f3a883441f0030000000000009bc403331b00e0000064c9cfa988bbe7b2df671af345bcf8fa904cebb8000000020000000000000147fb84cfc180e0004fd3f9811224bf5a87bbaf002a345560c2d98d7…	16112858	0x817b0b73f46fe65cb56f7aeb8eb0a4be0c3173bc64bf9b41a304cda8fa10aeb4
33813	0x1bdf1d9e2b4fe4416293772fa26ce9c61a3b1588541fd0fe0db5ce7ee1a0f993	0x32ead0cd17bc5513439bcbd26fc9d669ea63d5e2	0x8e52130a5e11a6bd92cc3228f92f0e33750e5024	0	0x6a76120200000000000000000000000040a2accbd92bca938b02010e17a5b8929b49130d000000000000000000000000000000000000000000000000000000000000000000000000000000000000000000000000000000000000000000000000000001400000000000000000000000000000000000000000000000000000000000000001000000000000000000000000000000000000000000000000000000000003c2f2000000000000000000000000000000000000000000000000000000000000000000000…	16112858	0x817b0b73f46fe65cb56f7aeb8eb0a4be0c3173bc64bf9b41a304cda8fa10aeb4
33814	0xa08a9041cdda7f8e0615d9198c8999c6a26145f9c4c35d6d535431137cb54fbf	0x184dfd1197187c8ffc88da905fbacd31b739fa41	0xdef8524c97b41017156b27852f1ec22cd9a8798b	0	0x42842e0e000000000000000000000000184dfd1197187c8ffc88da905fbacd31b739fa41000000000000000000000000cb69740187a6415d3497470c2ea32e633d456051000000000000000000000000000000000000000000000000000000000000012d360c6ebe	16112858	0x817b0b73f46fe65cb56f7aeb8eb0a4be0c3173bc64bf9b41a304cda8fa10aeb4
33816	0x7db95d61dac513c8544603d78942155fc6547ab88bf31c11ae48e03c583e3692	0x512fce9b07ce64590849115ee6b32fd40ec0f5f3	0x1111111254eeb25477b68fb85ed929f73a960582	0	0x12aa3caf00000000000000000000000053222470cdcfb8081c0e3a50fd106f0d69e63f20000000000000000000000000ac3e018457b222d93114458476f3e3416abbe38f000000000000000000000000eeeeeeeeeeeeeeeeeeeeeeeeeeeeeeeeeeeeeeee00000000000000000000000053222470cdcfb8081c0e3a50fd106f0d69e63f20000000000000000000000000512fce9b07ce64590849115ee6b32fd40ec0f5f3000000000000000000000000000000000000000000000002604942b2a2e88cd000000…	16112858	0x817b0b73f46fe65cb56f7aeb8eb0a4be0c3173bc64bf9b41a304cda8fa10aeb4
33817	0xbdd804999b0cfce15bba679ea7a7dc1a864642082aa76d59064f222c179b10f2	0x69be4b80090d3e642d1d3b30ba40c790369c0509	0xccb9d89e0f77df3618eec9f6bf899be3b5561a89	0	0xa22cb46500000000000000000000000000000000000111abe46ff893f3b2fdf1f759a8a80000000000000000000000000000000000000000000000000000000000000001	16112858	0x817b0b73f46fe65cb56f7aeb8eb0a4be0c3173bc64bf9b41a304cda8fa10aeb4
33818	0x08de95134b3108d388c816bc22d4c5214500c73ac3884673d4ae72279a189729	0x2e6e67907cefe51158f5a79f9a1b228321790750	0x68b3465833fb72a70ecdf485e0e4c7bd8665fc45	1e+17	0x5ae401dc00000000000000000000000000000000000000000000000000000000638cdc2300000000000000000000000000000000000000000000000000000000000000400000000000000000000000000000000000000000000000000000000000000001000000000000000000000000000000000000000000000000000000000000002000000000000000000000000000000000000000000000000000000000000000e4472b43f3000000000000000000000000000000000000000000000000016345785d8a0…	16112858	0x817b0b73f46fe65cb56f7aeb8eb0a4be0c3173bc64bf9b41a304cda8fa10aeb4
33819	0x791c3706c14c30ab334814d18a1a767b5f0f16c5f72a2bade7675ea4ce59cc29	0xdfd5293d8e347dfe59e90efd55b2956a1343963d	0x6262292e03c897b3be45e07918f1ab6850db99ce	2.29e+17	0x	16112858	0x817b0b73f46fe65cb56f7aeb8eb0a4be0c3173bc64bf9b41a304cda8fa10aeb4
33824	0x9b8cd070109c86dd820088f61761586bf6fb83dc2270ab633faa9584efb50c3f	0xe613f5fd3958d71902bc332e9c1d5555c9c68aa7	0xf4b5470523ccd314c6b9da041076e7d79e0df267	0	0xa9059cbb000000000000000000000000eb286757020df592ef3585dd4839bb9261e56bfc00000000000000000000000000000000000000000000152d4a88233576644ea7	16112858	0x817b0b73f46fe65cb56f7aeb8eb0a4be0c3173bc64bf9b41a304cda8fa10aeb4
33826	0xc7b2286b32d8306bc26657dbe31067aa61750350b917df2c70f2d8845e1ae4e4	0x21a31ee1afc51d94c2efccaa2092ad1028285549	0x21d6e3501cf32b7db4757a3931aff19d515b68ac	7.91e+16	0x	16112858	0x817b0b73f46fe65cb56f7aeb8eb0a4be0c3173bc64bf9b41a304cda8fa10aeb4
33827	0x3c8b0c622b5cafe85666091fb31c90c8de6b25af671f5f4db54809273caeb4e3	0xe7caa54e1e36d5352ac22b0f473dc61bd6421b56	0x68b3465833fb72a70ecdf485e0e4c7bd8665fc45	0	0x5ae401dc00000000000000000000000000000000000000000000000000000000638cdc17000000000000000000000000000000000000000000000000000000000000004000000000000000000000000000000000000000000000000000000000000000020000000000000000000000000000000000000000000000000000000000000040000000000000000000000000000000000000000000000000000000000000016000000000000000000000000000000000000000000000000000000000000000e4472b4…	16112858	0x817b0b73f46fe65cb56f7aeb8eb0a4be0c3173bc64bf9b41a304cda8fa10aeb4
33829	0x7e990bb953bcd89c44c904ee6f91591a1f8df9b4959a6864d49413ee6d2fb37f	0xf3a695572a6c9791baa37a97b776efd5fdca25c3	0xdac17f958d2ee523a2206206994597c13d831ec7	0	0xa9059cbb000000000000000000000000b6cacee94a8627d3ecd964ad2a66a7bac1ed42b00000000000000000000000000000000000000000000000000000000011e1a300	16112858	0x817b0b73f46fe65cb56f7aeb8eb0a4be0c3173bc64bf9b41a304cda8fa10aeb4
33830	0x3db6d6e1391cb5e073cf91b53d0591af959555cd99f7cd9aad03e19b02cc9364	0x21a31ee1afc51d94c2efccaa2092ad1028285549	0x6b175474e89094c44da98b954eedeac495271d0f	0	0xa9059cbb00000000000000000000000098f78c4023d454409e477afbd51c3cf2d8854e6d00000000000000000000000000000000000000000000000168d28e3f00280000	16112858	0x817b0b73f46fe65cb56f7aeb8eb0a4be0c3173bc64bf9b41a304cda8fa10aeb4
33831	0x2231cd63d09d57a8d67a1ac1095ffd1ea01d6a7ae6eef712b805f1accaf4528b	0x1a710dffac679516def394b6fa84badbdef6e44b	0x758982386d532d977b462f5b80e16928ea6652dc	0	0x0dcd7a6c000000000000000000000000894ce829582fe02e9a95e05d72d81bf1469397bf00000000000000000000000000000000000000000000000000000007afaf4b86000000000000000000000000dac17f958d2ee523a2206206994597c13d831ec70000000000000000000000000000000000000000000000000000000063960fa40000000000000000000000000000000000000000000000000000000000000b0100000000000000000000000000000000000000000000000000000000000000c000000…	16112858	0x817b0b73f46fe65cb56f7aeb8eb0a4be0c3173bc64bf9b41a304cda8fa10aeb4
33832	0x418b9b62ba25a32f13c2e278b9e8792a58ebbd924108288a1daaf80e18f6b9d6	0x1be210e7990eff6c07cb8cadcb9d077063ac3614	0x2177f5395c1149fa50813f8beec046b44de12061	2100000000000000	0x	16112858	0x817b0b73f46fe65cb56f7aeb8eb0a4be0c3173bc64bf9b41a304cda8fa10aeb4
33833	0x8b4e3dc3b05646058a792948c10c8f8441c424deba7f3cbe9e5dcf587fc6cc6f	0x9bad35fcb8d46029a7a6b0cf8eed35e350a56d74	0x303dfca16294e60459ed569b1ca680619d7b64f9	0	0xa22cb4650000000000000000000000001e0049783f008a0085193e00003d00cd54003c710000000000000000000000000000000000000000000000000000000000000001	16112858	0x817b0b73f46fe65cb56f7aeb8eb0a4be0c3173bc64bf9b41a304cda8fa10aeb4
33834	0xf1129f2a4254c11caafbce4b16c7b3115fd78404c5c9ba4c44bede1588b4dad7	0x19e34d09c2664d4f0829b1431ea73dac1b2bea93	0x4f4495243837681061c4743b74b3eedf548d56a5	0	0x09c5eabe00000000000000000000000000000000000000000000000000000000000000200000000000000000000000000000000000000000000000000000000000002420000000000000000000000000000000000000000000000000000000000000004000000000000000000000000000000000000000000000000000000000000008c00000000000000000000000000000000000000000000000000000000000000860000000000000000000000000000000000000000000000000000000000000000100000…	16112858	0x817b0b73f46fe65cb56f7aeb8eb0a4be0c3173bc64bf9b41a304cda8fa10aeb4
33836	0x2d39f54a6e38a0af97c2981b1739117623120ea2334b450a3be26f7103af27a8	0x45238d633d6a1d18ccde5ffd234958ecea46eb86	0x66e76b0f2c69cfd9282f1d80f6f00686d611452b	0	0x417533990000000000000000000000000000000000000000000000000000000000000040000000000000000000000000000000000000000000000000000000000000014000000000000000000000000045238d633d6a1d18ccde5ffd234958ecea46eb8600000000000000000000000000000000000000000000008e4a99db5edc21f7f800000000000000000000000000000000000000000000000000000000638cd651000000000000000000000000000000000000000000000000000000000000008000000…	16112858	0x817b0b73f46fe65cb56f7aeb8eb0a4be0c3173bc64bf9b41a304cda8fa10aeb4
33837	0x239369ed11e936618496a7fb4db550b8a1545d3764be5c8f7c2bd951c1134135	0x93f635372008b7c5d770aaa6ff313454c8dc498c	0xa69babef1ca67a37ffaf7a485dfff3382056e78c	14611	0x1cff79cd000000000000000000000000fc588723ead01d032b837229577f6a532e5a0c20000000000000000000000000000000000000000000000000000000000000004000000000000000000000000000000000000000000000000000000000000000c41f3cc1fe0000000000000000000000000000000000000000000000000000000c1bd6be030000000000000000000000000000000000000000000000001178adc9372114000000000000000000000000000000000000006e1ea25d93833ce7b38085f6b…	16112858	0x817b0b73f46fe65cb56f7aeb8eb0a4be0c3173bc64bf9b41a304cda8fa10aeb4
33842	0x338c08e93a45cd2d16aa02692729c39b471abe5eee7eada0f483fd86732f1cf1	0x56eddb7aa87536c09ccc2793473599fd21a8b17f	0x0699f7bf76a26d24c68778e1ae26e5439ce3cf62	2.36e+16	0x	16112858	0x817b0b73f46fe65cb56f7aeb8eb0a4be0c3173bc64bf9b41a304cda8fa10aeb4
33843	0x5ebff43c07250ff198a0bd384ceadbcf65d9b4841c3a44bab80426b847f7262f	0x8214afb98121e899ed870bdadb84e27b0fb3e573	0x58e5bf4ab9bc4d8f4032cf03a32d87528c4e182c	1360000000000000	0x	16112858	0x817b0b73f46fe65cb56f7aeb8eb0a4be0c3173bc64bf9b41a304cda8fa10aeb4
33845	0x52a570c47b297a17c9e478d5ddc7051f9075cf4efef17ffed1639b7030752904	0x292f08a2ea12d1e57446ef4690284972be25ec85	0xb9e7e907b4011dac7aa28e035f88b8df10fb2199	0	0xb95b6941a1a15335bcc94fa02fa6c0d4a1e0cd0cad65473d9e95e1ee849d3590d17abc16	16112858	0x817b0b73f46fe65cb56f7aeb8eb0a4be0c3173bc64bf9b41a304cda8fa10aeb4
33847	0x9ef0ce47870b25a3fb8b5f2eb9754ebc2513808f9440999271107d6491c6ce2f	0x102f8b333a51053281335d55e177a3871aca6bd0	0xa0b86991c6218b36c1d19d4a2e9eb0ce3606eb48	0	0xa9059cbb0000000000000000000000008cfb56422a75abcb67ba37de18aa9a038927cb8c0000000000000000000000000000000000000000000000000000000077359400	16112858	0x817b0b73f46fe65cb56f7aeb8eb0a4be0c3173bc64bf9b41a304cda8fa10aeb4
33849	0xcb9f165d7c9689015ef49ec84bd12d0b56df51aa17f5078b985f8c217a9fe142	0xb4b536702ba4f4bae028ac3667d5882fb6096d03	0x00000000006c3852cbef3e08e8df289169ede581	0	0xfd9f1e10000000000000000000000000000000000000000000000000000000000000002000000000000000000000000000000000000000000000000000000000000000010000000000000000000000000000000000000000000000000000000000000020000000000000000000000000b4b536702ba4f4bae028ac3667d5882fb6096d03000000000000000000000000004c00500000ad104d7dbd00e3ae0a5c00560c00000000000000000000000000000000000000000000000000000000000000016000000…	16112858	0x817b0b73f46fe65cb56f7aeb8eb0a4be0c3173bc64bf9b41a304cda8fa10aeb4
33850	0xd4ebddfde88a4742bacfa15f09a957b73f184026e8cc2a86a07f138bf3d28589	0xd8b55a5f3aac5ff64e48b6d02ee293ca378678f3	0x68b3465833fb72a70ecdf485e0e4c7bd8665fc45	0	0x5ae401dc00000000000000000000000000000000000000000000000000000000638cdc17000000000000000000000000000000000000000000000000000000000000004000000000000000000000000000000000000000000000000000000000000000020000000000000000000000000000000000000000000000000000000000000040000000000000000000000000000000000000000000000000000000000000016000000000000000000000000000000000000000000000000000000000000000e4472b4…	16112858	0x817b0b73f46fe65cb56f7aeb8eb0a4be0c3173bc64bf9b41a304cda8fa10aeb4
33853	0x8ad9dd3c4cbbe46fcfb6100b4a272eea2d8d820ac608e830b7e50f4a33b36bf6	0xca706d11048be3b6e901554d6f6ff690f4029afb	0xc36442b4a4522e871399cd717abdd847ab11fe88	0	0xac9650d8000000000000000000000000000000000000000000000000000000000000002000000000000000000000000000000000000000000000000000000000000000030000000000000000000000000000000000000000000000000000000000000060000000000000000000000000000000000000000000000000000000000000012000000000000000000000000000000000000000000000000000000000000001a00000000000000000000000000000000000000000000000000000000000000084fc6f7…	16112858	0x817b0b73f46fe65cb56f7aeb8eb0a4be0c3173bc64bf9b41a304cda8fa10aeb4
33854	0xba2cacde68230c7a691ebb87d976779d8f3dd0d9ff55b5ef4841de8d39c5cf70	0x1c1ce70ca6975cf60658fa55ae9358c8b295d062	0x00000000006c3852cbef3e08e8df289169ede581	0	0xfd9f1e100000000000000000000000000000000000000000000000000000000000000020000000000000000000000000000000000000000000000000000000000000000100000000000000000000000000000000000000000000000000000000000000200000000000000000000000001c1ce70ca6975cf60658fa55ae9358c8b295d062000000000000000000000000004c00500000ad104d7dbd00e3ae0a5c00560c00000000000000000000000000000000000000000000000000000000000000016000000…	16112858	0x817b0b73f46fe65cb56f7aeb8eb0a4be0c3173bc64bf9b41a304cda8fa10aeb4
33855	0xa28cd82aa2dbc03db669bcad6a888baccf62b84e05e7c057de17246280115d94	0x4976a4a02f38326660d17bf34b431dc6e2eb2327	0x1006913417f1f6fb47f7e8232018f856628caf25	2.2e+17	0x	16112858	0x817b0b73f46fe65cb56f7aeb8eb0a4be0c3173bc64bf9b41a304cda8fa10aeb4
33856	0x754b9ff4d6c7feee2b3fc974c4746ae0df737b9efd8f4d729157348d1b9b72f3	0x21a31ee1afc51d94c2efccaa2092ad1028285549	0xdac17f958d2ee523a2206206994597c13d831ec7	0	0xa9059cbb000000000000000000000000d4649e65c52314323fc78899599ff44d062ce77c000000000000000000000000000000000000000000000000000000009644afe6	16112858	0x817b0b73f46fe65cb56f7aeb8eb0a4be0c3173bc64bf9b41a304cda8fa10aeb4
33858	0x0c05a32ecb8e5a7561a398fcad105f478df6f3965df2052fef0faa631d436129	0xc66667898be6004143c4bc69080d365eaabf85cd	0x9d58c147720a9cbb88276ab79b1580c966946067	3970000000000000	0x	16112858	0x817b0b73f46fe65cb56f7aeb8eb0a4be0c3173bc64bf9b41a304cda8fa10aeb4
33860	0x40dc7690389a93d367b7d5d689e55bd9e9f15ecc23935bf4dafe6c74c690c167	0x56eddb7aa87536c09ccc2793473599fd21a8b17f	0x338e349e675f8fe0ebb2c0720df4d7883943b6d9	9.92e+16	0x	16112858	0x817b0b73f46fe65cb56f7aeb8eb0a4be0c3173bc64bf9b41a304cda8fa10aeb4
33862	0xac225e87af96bc55f4057047e9900e3381c09b24f142a286fcb4aa370dcd72af	0x7bd7650fe820d3a0baf01b41548e9aa96c0230fd	0x68b3465833fb72a70ecdf485e0e4c7bd8665fc45	0	0x5ae401dc00000000000000000000000000000000000000000000000000000000638cdc23000000000000000000000000000000000000000000000000000000000000004000000000000000000000000000000000000000000000000000000000000000020000000000000000000000000000000000000000000000000000000000000040000000000000000000000000000000000000000000000000000000000000016000000000000000000000000000000000000000000000000000000000000000e4472b4…	16112858	0x817b0b73f46fe65cb56f7aeb8eb0a4be0c3173bc64bf9b41a304cda8fa10aeb4
33863	0x5d6f6a9a0b795bdefbaf5ae938143d46227a5e76bde15b4e55df8434600f418b	0x1f2650c6a9144607e06519d204e524daa3b610f2	0x0443cca4a4a690492246edc3944f9d710ed1e3d8	1.42e+16	0x	16112858	0x817b0b73f46fe65cb56f7aeb8eb0a4be0c3173bc64bf9b41a304cda8fa10aeb4
33864	0x2a97c50e3b47e3a95a1aa40b7b552ac415fb44388b6f1fb000d07b6e370ca7af	0xe5c47645c7ce98a967863e6943eaa4c919b91f03	0x68b3465833fb72a70ecdf485e0e4c7bd8665fc45	5e+16	0x5ae401dc00000000000000000000000000000000000000000000000000000000638cdc2300000000000000000000000000000000000000000000000000000000000000400000000000000000000000000000000000000000000000000000000000000001000000000000000000000000000000000000000000000000000000000000002000000000000000000000000000000000000000000000000000000000000000e4472b43f300000000000000000000000000000000000000000000000000b1a2bc2ec50…	16112858	0x817b0b73f46fe65cb56f7aeb8eb0a4be0c3173bc64bf9b41a304cda8fa10aeb4
33865	0x303c4f662868b25a22d0ed0145fc6d6717c67d3181332a597d0b5e8dba4faef1	0x9a9798efb8a5841e32e5297ee060ba63319ce8f6	0x0000000000c2d145a2526bd8c716263bfebe1a72	0	0x32389b7100000000000000000000000000000000000000000000000000000000000000400000007b02230091a7ed01230072f7006a004d60a8d4e71d599b8104250f0000000000000000000000000000000000000000000000000000000000000000000100000000000000000000000000000000000000000000000000000000000000200000000000000000000000000000000000000000000000000000000000000060000000000000000000000000e0293be66b919120da50aa331e9c600f624781d600000…	16112858	0x817b0b73f46fe65cb56f7aeb8eb0a4be0c3173bc64bf9b41a304cda8fa10aeb4
33866	0x43f65fc954c450089f84c23e941c5ebc753a84c3ccd309c5a538d531c5fe2e06	0xbfa07848769954f5680d0c0f7c928ee0f26c2175	0x7a250d5630b4cf539739df2c5dacb4c659f2488d	0	0x791ac94700000000000000000000000000000000000000000000000000002a0aea29fcba0000000000000000000000000000000000000000000000000013d875227fbd4e00000000000000000000000000000000000000000000000000000000000000a0000000000000000000000000bfa07848769954f5680d0c0f7c928ee0f26c217500000000000000000000000000000000000000000000000000000000638cd5aa000000000000000000000000000000000000000000000000000000000000000200000…	16112858	0x817b0b73f46fe65cb56f7aeb8eb0a4be0c3173bc64bf9b41a304cda8fa10aeb4
33867	0xd48a624659ab51b3db197e26d3cb284913989e2b849fb4c48db2a8a9ff19143a	0x56eddb7aa87536c09ccc2793473599fd21a8b17f	0xdac17f958d2ee523a2206206994597c13d831ec7	0	0xa9059cbb0000000000000000000000003615e86c143d909c94161992ccc83813e49fb4cb000000000000000000000000000000000000000000000000000000000af7366e	16112858	0x817b0b73f46fe65cb56f7aeb8eb0a4be0c3173bc64bf9b41a304cda8fa10aeb4
33868	0x4741e7f1f4630d19ce999b536325d807f6e6e37c03c64753f98a20760323ea6f	0x94720b6ea8b6b3da826f8968cd4f0260190bc82a	0x68b3465833fb72a70ecdf485e0e4c7bd8665fc45	0	0x5ae401dc00000000000000000000000000000000000000000000000000000000638cd54b000000000000000000000000000000000000000000000000000000000000004000000000000000000000000000000000000000000000000000000000000000020000000000000000000000000000000000000000000000000000000000000040000000000000000000000000000000000000000000000000000000000000014000000000000000000000000000000000000000000000000000000000000000c4f3995…	16112858	0x817b0b73f46fe65cb56f7aeb8eb0a4be0c3173bc64bf9b41a304cda8fa10aeb4
33870	0x2efbea341964826b6c00dee5ded8662aa8b375193757d73af2ce3708374bfa24	0xa932e2c7d88497fdee9d87e5a450bae3874ff1a1	0xdac17f958d2ee523a2206206994597c13d831ec7	0	0x095ea7b3000000000000000000000000c92e8bdf79f0507f65a392b0ab4667716bfe0110ffffffffffffffffffffffffffffffffffffffffffffffffffffffffffffffff	16112858	0x817b0b73f46fe65cb56f7aeb8eb0a4be0c3173bc64bf9b41a304cda8fa10aeb4
33871	0x2beddda70ca54dfa6eb9ce4a1364e508a8dcd0dffd0dd6a58ffb78c5d82c84a7	0x0c544b97590c0a1baa621f5c59445139d9503832	0x0000000000c2d145a2526bd8c716263bfebe1a72	0	0x32389b7100000000000000000000000000000000000000000000000000000000000000400000007b02230091a7ed01230072f7006a004d60a8d4e71d599b8104250f00000000000000000000000000000000000000000000000000000000000000000001000000000000000000000000000000000000000000000000000000000000002000000000000000000000000000000000000000000000000000000000000000600000000000000000000000002893d2045a136e8cafa521425ce8349a0d3e1de300000…	16112858	0x817b0b73f46fe65cb56f7aeb8eb0a4be0c3173bc64bf9b41a304cda8fa10aeb4
33873	0x40bf4307931a32d461420866ec737dca4088c2a984f4d13c0d66abe8b479ec8f	0x61fc2279bcc0e83654618fcf1f2803b1d8dd42a0	0xc02aaa39b223fe8d0a0e5c4f27ead9083c756cc2	2e+16	0xd0e30db0	16112858	0x817b0b73f46fe65cb56f7aeb8eb0a4be0c3173bc64bf9b41a304cda8fa10aeb4
33874	0x77902b829b82c59ed686a72d7d07b42cc43caf8a99ab2a45281bb33c01370892	0x0c71c083ed8b608645222eeb67707f632a657289	0xdac17f958d2ee523a2206206994597c13d831ec7	0	0xa9059cbb0000000000000000000000004e5b2e1dc63f6b91cb6cd759936495434c7e972f00000000000000000000000000000000000000000000000000000000152e39d8	16112858	0x817b0b73f46fe65cb56f7aeb8eb0a4be0c3173bc64bf9b41a304cda8fa10aeb4
33876	0x2624657896e104f5cd65df257b96ffd32950b096e2db1397c5b5250b17538007	0xd43d8e8368bf45dd620b93a750621a5fe03ee578	0x353e41e66f58ce91d07d778520685473f38a7125	0	0x095ea7b300000000000000000000000068b3465833fb72a70ecdf485e0e4c7bd8665fc45ffffffffffffffffffffffffffffffffffffffffffffffffffffffffffffffff	16112858	0x817b0b73f46fe65cb56f7aeb8eb0a4be0c3173bc64bf9b41a304cda8fa10aeb4
33879	0x53d5334183fd7293497c0ad2b94f93f24295c74ac3e80ac6d645d68b177fc682	0x95222290dd7278aa3ddd389cc1e1d165cc4bafe5	0xeee27662c2b8eba3cd936a23f039f3189633e4c8	3.52e+16	0x	16112858	0x817b0b73f46fe65cb56f7aeb8eb0a4be0c3173bc64bf9b41a304cda8fa10aeb4
33881	0x12dc780ceac580cd208bc572861d49eff966074e1e75bfe5238d1059105dd5c7	0xc68d9a5ed5feefecf10239ecfd050ce03a9885f1	0x283af0b28c62c092c9727f1ee09c02ca627eb7f5	0	0xf14fcbc89a1fb5c707fe9ff5bee358cd1837a9f41cb34eb77eef04e44b6815b28f097de9	16112858	0x817b0b73f46fe65cb56f7aeb8eb0a4be0c3173bc64bf9b41a304cda8fa10aeb4
33882	0x59fa0197313e33d43ae2e86becfbd30344d79fa7368221b49b5b62b7a2ed21a7	0xf54460b638f0176d67f8f3953ed4fb4e5abdc683	0x68b3465833fb72a70ecdf485e0e4c7bd8665fc45	0	0x5ae401dc00000000000000000000000000000000000000000000000000000000638cdc170000000000000000000000000000000000000000000000000000000000000040000000000000000000000000000000000000000000000000000000000000000100000000000000000000000000000000000000000000000000000000000000200000000000000000000000000000000000000000000000000000000000000104472b43f300000000000000000000000000000000000000000000000000000045d964b…	16112858	0x817b0b73f46fe65cb56f7aeb8eb0a4be0c3173bc64bf9b41a304cda8fa10aeb4
33884	0xcbf10a95bd5b68f6dabba12102ea213ee60ce60782c7a16a1b8217c038d37e19	0x065e3dbafcb2c26a978720f9eb4bce6ad9d644a1	0xa69babef1ca67a37ffaf7a485dfff3382056e78c	51716	0x1cff79cd00000000000000000000000062e8c32a2ec5d904617369359b49e1c69d2a9877000000000000000000000000000000000000000000000000000000000000004000000000000000000000000000000000000000000000000000000000000000c4588116d80000000000000000000000000000000000000000000000001c71b28d05461d820000000000000000000000000000000000000000005418732ddfffb80000000000000000000000000000000000000000000000005180c6c005285e384154e…	16112858	0x817b0b73f46fe65cb56f7aeb8eb0a4be0c3173bc64bf9b41a304cda8fa10aeb4
33885	0xc5fcb9acf9c54fcd75b6ab93cf651ba9250847bd25518eb6d39e076f71957895	0x1be210e7990eff6c07cb8cadcb9d077063ac3614	0xf2581df25fd8c04ce05092645345761c975e7f04	2100000000000000	0x	16112858	0x817b0b73f46fe65cb56f7aeb8eb0a4be0c3173bc64bf9b41a304cda8fa10aeb4
33886	0x6b1766a69cb5e3607885aa9969c0fefe44cf9f1e1ad0572425e65639a0da608a	0x65f505cbd2c7d60267767011c9d01e4cce00836d	0xdef171fe48cf0115b1d80b88dc8eab59176fee57	0	0x46c67b6d0000000000000000000000000000000000000000000000000000000000000020000000000000000000000000ae7ab96520de3a18e5e111b5eaab095312d7fe84000000000000000000000000000000000000000000000001e1254ea252bd1fd7000000000000000000000000000000000000000000000001d9640258a6b165f7000000000000000000000000000000000000000000000001dbc4fe7fb0891fba000000000000000000000000000000000000000000000000000000000000000000000…	16112858	0x817b0b73f46fe65cb56f7aeb8eb0a4be0c3173bc64bf9b41a304cda8fa10aeb4
33888	0xa7eef20117fb557f9eda030d5028a266227865b648616d9ce011ead9e1621210	0xaf83d2274120adbfd70b450654953405ab1636d2	0x1e72bedea516708feb6b86b4137ed769472c1ee1	5010000000000000	0x	16112858	0x817b0b73f46fe65cb56f7aeb8eb0a4be0c3173bc64bf9b41a304cda8fa10aeb4
33889	0x879c4e13dda5c3b8ad64d5b189f9c62360ed34b7b1eb52d2413064d6b5eed55e	0xaf34746708c3027be832f7829fd8e91600b4ca87	0xb2ff7a4d83b72fdb8faa6c573a9ccfb5962f1390	4800000000000000	0x	16112858	0x817b0b73f46fe65cb56f7aeb8eb0a4be0c3173bc64bf9b41a304cda8fa10aeb4
33890	0xa2deb3a4def7908b760fd753ea134e452ac0533d2e232a925845955a6743464f	0x7d3ebd2b56651d164fc36180050e9f6f7b890e9d	0xb6ed7644c69416d67b522e20bc294a9a9b405b31	0	0x1801fbe5b1576a6a1c4efeef0300a04b46155ac7e1d56dbb5ea969e9bda679781c13f37600000000000000c50c5937259d46e67fad415265af21a8d3faa7e271f2812644	16112858	0x817b0b73f46fe65cb56f7aeb8eb0a4be0c3173bc64bf9b41a304cda8fa10aeb4
33891	0xe0937346b817747c2a98ca11488f7ec5c1251b4c3f6d042f6a0dfda2c9561630	0x931c75b98b4e07c7680ef89758ba539808f0b148	0x7d1afa7b718fb893db30a3abc0cfc608aacfebb0	0	0x095ea7b3000000000000000000000000881d40237659c251811cec9c364ef91dc08d300cffffffffffffffffffffffffffffffffffffffffffffffffffffffffffffffff	16112858	0x817b0b73f46fe65cb56f7aeb8eb0a4be0c3173bc64bf9b41a304cda8fa10aeb4
33892	0x6eebdbc35a0fe8282971eaf75e17875571cd84f810224144c5e9be41c4e99ec0	0x3ab28ecedea6cdb6feed398e93ae8c7b316b1182	0xadc87836554e9b3aa207a37f3d86b45792ede9e6	0	0xa9059cbb0000000000000000000000008380788e73e3c8e602e8593a8ac1e0337923a82d00000000000000000000000000000000000000000000016b1d9608e2b7060000	16112858	0x817b0b73f46fe65cb56f7aeb8eb0a4be0c3173bc64bf9b41a304cda8fa10aeb4
33893	0x2d6d7159cd1f0913d09d1b8a88196fc1fcc8c0e29b62151c40d7d379d27a3326	0xdc5ed41069d192d82f1c46508c28e6adabcc3c76	0x00000000006c3852cbef3e08e8df289169ede581	2.5e+17	0xfb0f3ee1000000000000000000000000000000000000000000000000000000000000002000000000000000000000000000000000000000000000000000000000000000000000000000000000000000000000000000000000000000000000000000000000000000000000000000000000000000000000000000000000031f5c4ed2768000000000000000000000000000c8123bae791f267f953e09d2eb50284514370b11000000000000000000000000004c00500000ad104d7dbd00e3ae0a5c00560c0000000…	16112858	0x817b0b73f46fe65cb56f7aeb8eb0a4be0c3173bc64bf9b41a304cda8fa10aeb4
33894	0xed9efafcc1c438081982b43aa4814220655387dac4bdad1c61fae10e0831ea1e	0x6e27eaadce8c04c3ce85d274d26f9d4f184e9d1f	0x68b3465833fb72a70ecdf485e0e4c7bd8665fc45	0	0x5ae401dc00000000000000000000000000000000000000000000000000000000638cdc2f000000000000000000000000000000000000000000000000000000000000004000000000000000000000000000000000000000000000000000000000000000020000000000000000000000000000000000000000000000000000000000000040000000000000000000000000000000000000000000000000000000000000016000000000000000000000000000000000000000000000000000000000000000e4472b4…	16112858	0x817b0b73f46fe65cb56f7aeb8eb0a4be0c3173bc64bf9b41a304cda8fa10aeb4
33898	0xa822e5d0b31b8c27c6205c54f090f858d30e81f001d7506bac3674beef2d4d5c	0x43e4715ae093a4c86b5ecddb52216c4f879e9672	0xa69babef1ca67a37ffaf7a485dfff3382056e78c	26116	0x1cff79cd000000000000000000000000fc588723ead01d032b837229577f6a532e5a0c20000000000000000000000000000000000000000000000000000000000000004000000000000000000000000000000000000000000000000000000000000000c4588116d80000000000000000000000000000000000000000000000000000000bf2afe6010000000000000000000000000000000000000000000000001178adc9372114000000000000000000000000000000000000006e1ea25d93833ce7b38085f6b…	16112858	0x817b0b73f46fe65cb56f7aeb8eb0a4be0c3173bc64bf9b41a304cda8fa10aeb4
33899	0x66187b705265731efd3b21e7c769ec757f0060cb5711e41177bc51296600ba35	0x76984a5c0e8ba091d8667a2f8347a1494df18ab2	0x2245ece0c55ccb966c2e66e7f2e298e27916ddc2	794000000000000	0x	16112858	0x817b0b73f46fe65cb56f7aeb8eb0a4be0c3173bc64bf9b41a304cda8fa10aeb4
33902	0xedfd589c8de8ac0840ce34ae9fcb9dc1c84255cb0666d66986cd47c4cac1ada9	0x9696f59e4d72e237be84ffd425dcad154bf96976	0x663b6276b3f5f1d71fd15534624471c2a694b129	3.83e+16	0x	16112858	0x817b0b73f46fe65cb56f7aeb8eb0a4be0c3173bc64bf9b41a304cda8fa10aeb4
33903	0x74e86fb2c33e1c0e881d476551bdfdcd715bd56752562d77fedf99f95a176c3f	0x1be210e7990eff6c07cb8cadcb9d077063ac3614	0x174243b17afc145e99d7ee458ad8841cf6e81d59	2100000000000000	0x	16112858	0x817b0b73f46fe65cb56f7aeb8eb0a4be0c3173bc64bf9b41a304cda8fa10aeb4
33904	0x2337e468dc885ec8166a23393e7e69c3301be90ab5a22194bbc3955cc38f7b90	0xdfd5293d8e347dfe59e90efd55b2956a1343963d	0x38448799fe5c23216f89a6dfe6893824b94549eb	4e+18	0x	16112858	0x817b0b73f46fe65cb56f7aeb8eb0a4be0c3173bc64bf9b41a304cda8fa10aeb4
33905	0x1b4b3785ea98489a2a4db663795a623b4b026118b81d4ecc7fbf0f1e3df8fd55	0x4976a4a02f38326660d17bf34b431dc6e2eb2327	0x42fd0225d2f2eb5d5e4745123dd72ace5f8239a1	2.31e+16	0x	16112858	0x817b0b73f46fe65cb56f7aeb8eb0a4be0c3173bc64bf9b41a304cda8fa10aeb4
33907	0x5d80085c59ff147d8227c9d9603ef13033444dba9a1331b43e5871fd11cfa9a8	0x9696f59e4d72e237be84ffd425dcad154bf96976	0xdac17f958d2ee523a2206206994597c13d831ec7	0	0xa9059cbb000000000000000000000000bf0788dfee0d04f8525d128e14eb12015cecc4c100000000000000000000000000000000000000000000000000000000538dc540	16112858	0x817b0b73f46fe65cb56f7aeb8eb0a4be0c3173bc64bf9b41a304cda8fa10aeb4
33908	0x048bfbb33ceef9e499c2b5d08c697ed857563ffd99cdea7622be5209d1b4df5d	0xff9911abdbe9d1f7d1a19595b93905c2a9ad60f4	0xc02aaa39b223fe8d0a0e5c4f27ead9083c756cc2	0	0x2e1a7d4d000000000000000000000000000000000000000000000000004103c0c763c000	16112858	0x817b0b73f46fe65cb56f7aeb8eb0a4be0c3173bc64bf9b41a304cda8fa10aeb4
33909	0x4ffd310528b72e5433fcf1f1ef8a90d2fb1c0eb28273fb9ab1f77ada217d4173	0x9696f59e4d72e237be84ffd425dcad154bf96976	0x86f0bca29219b5dd9e370476d00bb9febcb6d333	5.03e+17	0x	16112858	0x817b0b73f46fe65cb56f7aeb8eb0a4be0c3173bc64bf9b41a304cda8fa10aeb4
33910	0x9dccfb4384babab7040e0e1ed5fab7168b6afebb968311fea36b5b18d97b9f04	0x94b3c5fc67b0c63befcc74d7afcd333baa697b2a	0x7a250d5630b4cf539739df2c5dacb4c659f2488d	0	0x38ed17390000000000000000000000000000000000000000000000056bc75e2d6310000000000000000000000000000000000000000000000000000004a211212420228400000000000000000000000000000000000000000000000000000000000000a000000000000000000000000094b3c5fc67b0c63befcc74d7afcd333baa697b2a00000000000000000000000000000000000000000000000000000184de20cb46000000000000000000000000000000000000000000000000000000000000000200000…	16112858	0x817b0b73f46fe65cb56f7aeb8eb0a4be0c3173bc64bf9b41a304cda8fa10aeb4
33911	0xc4d9bbdabbbf240606cab5376e3da1d1ad71d3c02209ea8ea6e1275c4f1e0060	0x5dfc1f36bee4938b3dc8ebdb4c34f64c935fc2f9	0xef1c6e67703c7bd7107eed8303fbe6ec2554bf6b	5.95e+17	0x24856bc300000000000000000000000000000000000000000000000000000000000000400000000000000000000000000000000000000000000000000000000000000080000000000000000000000000000000000000000000000000000000000000000210040000000000000000000000000000000000000000000000000000000000000000000000000000000000000000000000000000000000000000000000000002000000000000000000000000000000000000000000000000000000000000004000000…	16112858	0x817b0b73f46fe65cb56f7aeb8eb0a4be0c3173bc64bf9b41a304cda8fa10aeb4
33913	0x7c13467a000045f2d0c562438ac2adfc70c98d6f55241a02b6f824306f0ed257	0x0b4eb75832d98c7b7478502ccaa07d6c2618c42f	0x06450dee7fd2fb8e39061434babcfc05599a6fb8	0	0x9ff054df000000000000000000000000000000000000000000000000000000000000007d	16112858	0x817b0b73f46fe65cb56f7aeb8eb0a4be0c3173bc64bf9b41a304cda8fa10aeb4
33914	0x09acf5a1547c56ca683cbd1cc1229e62d33c497b725f87735b6691bf6b077d5f	0x28c6c06298d514db089934071355e5743bf21d60	0xd7ac17dacb95b82bdb87fcbe6ecae11bf02a7d08	1.05e+18	0x	16112858	0x817b0b73f46fe65cb56f7aeb8eb0a4be0c3173bc64bf9b41a304cda8fa10aeb4
33916	0x3f10a9b274831370a3a888bf281293ff53277690d2945a701491ca25a7e972a1	0x8e8f818d3371f797a2db7edb32803607c8b3c6a9	0x98c3d3183c4b8a650614ad179a1a98be0a8d6b8e	0	0x49c36c07000000000000000000000000fd76be67fff3bac84e3d5444167bbc018f5968b60000000000000000000000000000000000000000000000000e4857d6083c590000000000000000000000000000000000000000323165622139ba000000000000000000000000000000000000000000000000003213d7f9bb33800000000000000000000000000000000000000000000000000000000000000000000000000001	16112858	0x817b0b73f46fe65cb56f7aeb8eb0a4be0c3173bc64bf9b41a304cda8fa10aeb4
33917	0x2e2023e15c4ff5b664ea2238224b0d638f6c14814bba74926d9ac8ae8e8413e6	0xe5a43b3d9c408ee7da43dca881d41912f885abb2	0x8bc3702c35d33e5df7cb0f06cb72a0c34ae0c56f	0	0xa694fc3a00000000000000000000000000000000000000000000000094e89e2667f10000	16112858	0x817b0b73f46fe65cb56f7aeb8eb0a4be0c3173bc64bf9b41a304cda8fa10aeb4
33918	0xcabb8e7756019152b073a8734ab8a54a3b03f3018bf9b68d1b40e2f6264dbbf0	0x6dec4b6c66fdb0df742e05f7f277ed7232596c71	0xb7ab762d27959802aabfb0ddd8d45df0817242ed	0	0x42842e0e0000000000000000000000006dec4b6c66fdb0df742e05f7f277ed7232596c71000000000000000000000000957f8e6ad17233f57a06d1bc42f17f606121b42b0000000000000000000000000000000000000000000000000000000000002634	16112858	0x817b0b73f46fe65cb56f7aeb8eb0a4be0c3173bc64bf9b41a304cda8fa10aeb4
33919	0x8ffd9cceb1a8c945dfebeb1ade1c1693e1d4158f35558161a1d5059b713ce739	0x562b0d1d3ad331022842b39589d01cad924e12ef	0x4afd163f281ed126cb07eaf99f52d8a083e135e3	0	0xb364deb2000000000000000000000000000000000000000000000000000000000000278c000000000000000000000000000000000000000000000000000000000000000100000000000000000000000000000000000000000000000000000000638e27e6000000000000000000000000000000000000000000000000000000000000000100000000000000000000000000000000000000000000000000000000000000a000000000000000000000000000000000000000000000000000000000000000419662a…	16112858	0x817b0b73f46fe65cb56f7aeb8eb0a4be0c3173bc64bf9b41a304cda8fa10aeb4
33921	0x0170f35584f98a15e394dd9c3d5777e4e4d468a93e1f5a2ef2b9d75178941019	0x3a7a1c811d3bb561181fa771006832fadcd01019	0x617dee16b86534a5d792a4d7a62fb491b544111e	0	0xabcffc260000000000000000000000004fe5b965e3bd76eff36280471030ef9b0e6e2c1d0000000000000000000000000000000000000000000000000000000000000080000000000000000000000000000000000000000000000000000000000000024000000000000000000000000000000000000000000000000000000000000006e00000000000000000000000005a98fcbea516cf06857215779fd812ca3bef1b32000000000000000000000000a0b86991c6218b36c1d19d4a2e9eb0ce3606eb4800000…	16112858	0x817b0b73f46fe65cb56f7aeb8eb0a4be0c3173bc64bf9b41a304cda8fa10aeb4
33922	0x3fe6865501f2e366541aa5fbff868b93a1d9d350e1da73591ba33290d8acb129	0xcaa6d941b940371d6f95e17a4a6d6291dc5c7520	0x68b3465833fb72a70ecdf485e0e4c7bd8665fc45	3e+16	0x5ae401dc00000000000000000000000000000000000000000000000000000000638cdc2300000000000000000000000000000000000000000000000000000000000000400000000000000000000000000000000000000000000000000000000000000001000000000000000000000000000000000000000000000000000000000000002000000000000000000000000000000000000000000000000000000000000000e4472b43f3000000000000000000000000000000000000000000000000006a94d74f430…	16112858	0x817b0b73f46fe65cb56f7aeb8eb0a4be0c3173bc64bf9b41a304cda8fa10aeb4
33923	0x7fdc31badc00b9b847a91d05600aae553dcc14de93b7a7bfe5c628f4f960dc8f	0xcbbe0ce40aaf9afebb4512779cc6bfa2f23e382f	0x7fb0bb9374fafff311ad9738181eaf6c06a21e5c	8e+16	0x	16112858	0x817b0b73f46fe65cb56f7aeb8eb0a4be0c3173bc64bf9b41a304cda8fa10aeb4
33924	0xe0100276f91b2fd7a79998a66b312262be9381a33d09cb75974fbb2351acb95f	0xdde8a636510d560ab38a10a5f4f65f0c100a2199	0x9a4d3054e44b0b1d5c6bc24ff1c00c30885b2c4c	3.47e+17	0x	16112858	0x817b0b73f46fe65cb56f7aeb8eb0a4be0c3173bc64bf9b41a304cda8fa10aeb4
33925	0x6241ba8b2549a83dfac4f0db107580da04e025d37f29306095521168f99ea67c	0x04390ac4ca5c5ce3e07409233cd40c24afb556e2	0xa0b511e85ba1dbb8151fb7414da594454da5e40c	7.25e+17	0x	16112858	0x817b0b73f46fe65cb56f7aeb8eb0a4be0c3173bc64bf9b41a304cda8fa10aeb4
33927	0xfd44cdc40be426ecce2dfbedac723e4e6285417de8d2c194ed8a14c9e8627d4f	0xeee28d484628d41a82d01e21d12e2e78d69920da	0xdac17f958d2ee523a2206206994597c13d831ec7	0	0xa9059cbb0000000000000000000000005d6675c88bbbd805a5d4f718c5496c45f02445e80000000000000000000000000000000000000000000000000000000003692d73	16112858	0x817b0b73f46fe65cb56f7aeb8eb0a4be0c3173bc64bf9b41a304cda8fa10aeb4
33928	0x89b9fa1aad9e13f7068e3560ed284c587ec4c5cc9e4e410dd79c8a6147e6ee17	0x1be210e7990eff6c07cb8cadcb9d077063ac3614	0x94d6803f603d0d040194da9fa4ee75308444e071	2100000000000000	0x	16112858	0x817b0b73f46fe65cb56f7aeb8eb0a4be0c3173bc64bf9b41a304cda8fa10aeb4
33930	0x0a16bc7be243db3550f34dada75d27930c8d9684ca9f78c5f59d38b0b10262c7	0xeb9d0e3ba530c03d0ca581d42406b51c628c7e61	0xd9e1ce17f2641f24ae83637ab66a2cca9c378b9f	1e+18	0x7ff36ab5000000000000000000000000000000000000000000000000000000004a963aea0000000000000000000000000000000000000000000000000000000000000080000000000000000000000000eb9d0e3ba530c03d0ca581d42406b51c628c7e6100000000000000000000000000000000000000000000000000000000638cdc2f0000000000000000000000000000000000000000000000000000000000000002000000000000000000000000c02aaa39b223fe8d0a0e5c4f27ead9083c756cc200000…	16112858	0x817b0b73f46fe65cb56f7aeb8eb0a4be0c3173bc64bf9b41a304cda8fa10aeb4
33932	0x2ea2faa23ff609edf0b5f141b6124dd1938116369077be88f62f7ec98e5c3a6f	0x1be210e7990eff6c07cb8cadcb9d077063ac3614	0xbb6403dcc413c85b9a3e9e829d478932ef46b48e	2100000000000000	0x	16112858	0x817b0b73f46fe65cb56f7aeb8eb0a4be0c3173bc64bf9b41a304cda8fa10aeb4
33934	0x71e7070e3edd0845906425101d4fd018c957623d17129be20962fca7113adb77	0x544f6de72a29405ef5e3365c58245e638cc44e19	0xcac0f1a06d3f02397cfb6d7077321d73b504916e	1e+16	0x	16112858	0x817b0b73f46fe65cb56f7aeb8eb0a4be0c3173bc64bf9b41a304cda8fa10aeb4
33935	0x9c0052f02e933815084ac75435f25b3c17fa29a499b181c2443401712f58d3f0	0xc59e591a5a159a6fb9fcb4285052f4c5c2657810	0xc02aaa39b223fe8d0a0e5c4f27ead9083c756cc2	9e+16	0xd0e30db0	16112858	0x817b0b73f46fe65cb56f7aeb8eb0a4be0c3173bc64bf9b41a304cda8fa10aeb4
33936	0x1ad2237c69234a0035a36b372ace247b0297f4b4202ac024dafb485adf485e8d	0xf6cd0200a6b94ab46f2cbd5c934b358bbeb552ea	0x00000000006c3852cbef3e08e8df289169ede581	0	0xe7acab24000000000000000000000000000000000000000000000000000000000000008000000000000000000000000000000000000000000000000000000000000006600000007b02230091a7ed01230072f7006a004d60a8d4e71d599b8104250f0000000000000000000000000000000000000000000000000000000000000000000000000000000000000000000000000000000000000000000000000000000000a0000000000000000000000000000000000000000000000000000000000000000100000…	16112858	0x817b0b73f46fe65cb56f7aeb8eb0a4be0c3173bc64bf9b41a304cda8fa10aeb4
33937	0xc6d34ff82ab276b83a81f711dcb179ee87158e67d9d567fe487f6b679fba1ec0	0xc74ce67bfc623c803d48afc74a09a6ff6b599003	0xffdb505cad574af3b73e0f4005ccf54a2da100ae	0	0xc980753900000000000000000000000000000000000000000000000000000000000000800000000000000000000000000000000000000000000000000000000000000320000000000000000000000000000000000000000000000000000000000000040000000001000100000000000000000000000000000000000000000000000000000000000000000000000000000000000000000000000000000000000000000280000000000000000000000069109b547f4a34e5b9d6ceb9d495f89a00015954010a0e0…	16112858	0x817b0b73f46fe65cb56f7aeb8eb0a4be0c3173bc64bf9b41a304cda8fa10aeb4
33939	0xb97833dd17ce383dcfc7dc7ae9bc237114410792a6ef14b4110dc0398124ae5f	0x59e178f12e71e2e8fa3eebb44e31820bc1d27a62	0xdac17f958d2ee523a2206206994597c13d831ec7	0	0xa9059cbb0000000000000000000000001689a089aa12d6cbbd88bc2755e4c192f87020000000000000000000000000000000000000000000000000000000000037735834	16112858	0x817b0b73f46fe65cb56f7aeb8eb0a4be0c3173bc64bf9b41a304cda8fa10aeb4
33940	0xa5aa7a9c4c6a256db8ff193993564e3ca1f6c95b0a41bd0f84b23ce4c086e23b	0xa7b7dec9ef130444856ffba85f87e45d5b830d51	0x000000000000ad05ccc4f10045630fb830b95127	4.62e+16	0x9a1fc3a70000000000000000000000000000000000000000000000000000000000000040000000000000000000000000000000000000000000000000000000000000036000000000000000000000000000000000000000000000000000000000000000e0000000000000000000000000000000000000000000000000000000000000001c0e28ce3ec5398491c4a1df88203623fc095e955aea9f65e85b6f2868cd30ee3540b2e9b3f53aa2a9cf7de79cb4d88eeddab05b884ac384006603a458bb18567900000…	16112858	0x817b0b73f46fe65cb56f7aeb8eb0a4be0c3173bc64bf9b41a304cda8fa10aeb4
33943	0x8796876808967e722b2a46f9db0764b09e671f641ddb37e036b677738e414242	0x5041ed759dd4afc3a72b8192c143f72f4724081a	0xa0b86991c6218b36c1d19d4a2e9eb0ce3606eb48	0	0xa9059cbb00000000000000000000000047797831ffd306d59c945f766a3d85cf3bb253ab0000000000000000000000000000000000000000000000000000000162172ee8	16112858	0x817b0b73f46fe65cb56f7aeb8eb0a4be0c3173bc64bf9b41a304cda8fa10aeb4
33944	0x3a7fb2da58b3fc7725fd7a1ce5b3872751e6e2f65ab44194393513ae6d041b75	0x28c6c06298d514db089934071355e5743bf21d60	0x3845badade8e6dff049820680d1f14bd3903a5d0	0	0xa9059cbb00000000000000000000000062da7b8dc15be8e79bd09d5bcc87437f20acb50000000000000000000000000000000000000000000000000043079b68d9230000	16112858	0x817b0b73f46fe65cb56f7aeb8eb0a4be0c3173bc64bf9b41a304cda8fa10aeb4
33945	0x283563d3f61c03f3c4d51c0f816412a8f9d4b1545e06444a2b60612d41ee4d2f	0x1be210e7990eff6c07cb8cadcb9d077063ac3614	0xcc95679aa34ba4385de7239cd05a5fc2bfd433ac	2100000000000000	0x	16112858	0x817b0b73f46fe65cb56f7aeb8eb0a4be0c3173bc64bf9b41a304cda8fa10aeb4
33946	0xf4e95c3bd84257403a546eebd46caa8750e100e36b678655002e28b99d6b5a9f	0xec1c1686b92e8e6ce4fae072040942bf8a272b3c	0xeeeec6476073778077b40a73fe32e23a9876cab4	7.95e+16	0x2b66d72e000000000000000000000000000000000000000000000000000000000000002000000000000000000000000000000000000000000000000000000000000000ee65794a68624763694f694a46557a49314e694973496d74705a434936496a64684e6a526c5a6d51314c544a694e4463744e475a6a5a6931684f4463784c5445785a6d59354f5451345954646a4f434a392e436763784d6a55334c6a673445674e56553051614a4449335a47497a4d474d794c54686d4d4441744e4445325a6931694e7…	16112857	0xd9845d6da8a7e1403d7f86dc2b7877f07a884ab729d6bcf59a0dac973c739f28
33947	0x86f8d436588110a44de8c59421fd4109f0d06f8e26211c06ca81d82a2cceb98d	0x612271eb70d73d5c5e138d8daf54e2eb9544a844	0xca21d4228cdcc68d4e23807e5e370c07577dd152	0	0xa22cb46500000000000000000000000000000000000111abe46ff893f3b2fdf1f759a8a80000000000000000000000000000000000000000000000000000000000000001	16112857	0xd9845d6da8a7e1403d7f86dc2b7877f07a884ab729d6bcf59a0dac973c739f28
33949	0x04139161173488df7e495854096fdd378443a9b9ec68707fa24a98643b498d93	0x1be210e7990eff6c07cb8cadcb9d077063ac3614	0xbb8aef8c1c670d6eb0f09221320b4887564d7748	2100000000000000	0x	16112857	0xd9845d6da8a7e1403d7f86dc2b7877f07a884ab729d6bcf59a0dac973c739f28
33951	0x4624529194de31ce297dc4cdf8f6fb74ac2c9710508d363b7dfec45480ca37a2	0xd24400ae8bfebb18ca49be86258a3c749cf46853	0xc98ef0869970c701d408cb5afd4b9e3cf88f65ec	1e+18	0x	16112857	0xd9845d6da8a7e1403d7f86dc2b7877f07a884ab729d6bcf59a0dac973c739f28
33952	0xda98a462acabbd8c675d70e0d36db9fc638bda4a5c93f0cd083ef51da5ff6389	0xd24400ae8bfebb18ca49be86258a3c749cf46853	0x5f65f7b609678448494de4c87521cdf6cef1e932	0	0xfa558b710000000000000000000000004d224452801aced8b2f0aebe155379bb5d594381000000000000000000000000000000000000000000000000000000000000006000000000000000000000000000000000000000000000000000000000000000a00000000000000000000000000000000000000000000000000000000000000001000000000000000000000000b0329b4cd8c45abaaf8a1be2bc85e2233a710e23000000000000000000000000000000000000000000000000000000000000000100000…	16112857	0xd9845d6da8a7e1403d7f86dc2b7877f07a884ab729d6bcf59a0dac973c739f28
33954	0xdaa0880ffdaeeecf99242a799e5e94e931818ba1594753420cdb59761185a343	0xb5d85cbf7cb3ee0d56b3bb207d5fc4b82f43f511	0x5f2a2b98a2c92c571f695f26c3d9a0364bf7b83f	8.72e+16	0x	16112857	0xd9845d6da8a7e1403d7f86dc2b7877f07a884ab729d6bcf59a0dac973c739f28
33955	0xf0863370ccdd4375dd9da881009dcb24086051e0ad16bd5901b3009d9f19ff5a	0x0c4ed2551f687d785866ebe7ed73bc2f4dd7c88e	0x15d4c048f83bd7e37d49ea4c83a07267ec4203da	0	0xa9059cbb000000000000000000000000d4c68828ba392beca6d3f33fdba37a23674d778800000000000000000000000000000000000000000000000000001e01fdb04c0f	16112857	0xd9845d6da8a7e1403d7f86dc2b7877f07a884ab729d6bcf59a0dac973c739f28
33966	0x564bd8c91b4bf2e3e198ffbea55c611fa204a1103c58dbc1ac97635c11f4e3bf	0xab97925eb84fe0260779f58b7cb08d77dcb1ee2b	0x24639284103e525d910bf0587ba58e65abc7f065	8e+16	0x	16112857	0xd9845d6da8a7e1403d7f86dc2b7877f07a884ab729d6bcf59a0dac973c739f28
33968	0xcda3052eadedf8790c9df16a04d20f12e17508e8e367cdbb7700b0745caef84f	0xc6368ceb63550449c11d661ecdf2c9d6021c2885	0x230c4d2ab9deff6916d9a1fd5c36166fc3c4d3df	5.91e+17	0x	16112857	0xd9845d6da8a7e1403d7f86dc2b7877f07a884ab729d6bcf59a0dac973c739f28
33969	0x3183233974741bd3243fe00c02effff5269cc5a14f054d24c9ba4a1293b60327	0xb739d0895772dbb71a89a3754a160269068f0d45	0x9cc716c560e301c15b126ab0413687af2c7b2369	4530000000000000	0x	16112857	0xd9845d6da8a7e1403d7f86dc2b7877f07a884ab729d6bcf59a0dac973c739f28
33971	0xf2685237b05436efe5ca92e073f3a2bac3539eed8e4da8b59b84660f7ef052c1	0x6887246668a3b87f54deb3b94ba47a6f63f32985	0x5e4e65926ba27467555eb562121fac00d24e9dd2	0	0xd0f893440002b44d530000640000050000000000000000000000000000000000001300000100638cd5080000f5dca300001f00000000638cd5080000f5dca400001f00000000638cd5170000f5dca400001200000000638cd5170000f5dca6789cecbd773cd66dfb387e5d97bd65cf8c4889ac704966888c909555f648f6de337b762942deb2322323b292ac6c9111b2b242921df9bd9edccff7c3fde0fdb8ddf7e37e7eafe7f8ef7238dee73cc6799cc7719c1018de3a0cdb07c925c287e086a70fea9c25c26…
33972	0xdc089a7684fe7cb0488feb5fff7597cd3861029fd1fc20ee2c6cf8ba7cb27fbc	0xddfabcdc4d8ffc6d5beaf154f18b778f892a0740	0x0675f7d372c3d5cccf4a69f617437d4529d2cddb	7.97e+16	0x	16112857	0xd9845d6da8a7e1403d7f86dc2b7877f07a884ab729d6bcf59a0dac973c739f28
33973	0x179a638711820d08e362950ae9d28c1aa8614952934570bff19cc04d987ed74c	0xb5d85cbf7cb3ee0d56b3bb207d5fc4b82f43f511	0xaf525850fc9b8ef2547772df5c73d5584668ea4d	1.54e+17	0x	16112857	0xd9845d6da8a7e1403d7f86dc2b7877f07a884ab729d6bcf59a0dac973c739f28
33974	0xba67916e45e0deb239e1e75354c081fc89d8fb8ef8b21bd64ba6fd6b787f1670	0x71660c4005ba85c37ccec55d0c4493e66fe775d3	0xf4e0a9f80b33c32c16d89cbe71dc28b6845ac50a	3.97e+17	0x	16112857	0xd9845d6da8a7e1403d7f86dc2b7877f07a884ab729d6bcf59a0dac973c739f28
33975	0xf826469a6d2ad59a9c574635ac219dccbf6fd404d51704cf049a23ae1249f4c0	0x4728840ddaf0ac0a250eccbe1d7fa075967ab13c	0xa6b44f5ea2fc90cda51828e61cebbd34bc63a98b	0	0x226e5227000000000000000000000000000000000000000000000000000000000000002000000000000000000000000000000000000000000000000000000000000000800000000000000000000000000000000000000000000000000000000000000032000000000000000000000000000000000000000000000000000000000000000100000000000000000000000000000000000000000000000000000000000000020000000000000000000000000000000000000000000000000000000000000001	16112857	0xd9845d6da8a7e1403d7f86dc2b7877f07a884ab729d6bcf59a0dac973c739f28
33976	0xdb437fa431ee1b1a8a775fdc0dcb95564ce3cc46733591b6acfc40ec4f5f76b9	0x91e108fa77ffa155c154c7fe8fcaeb83888255aa	0xe83c9f09b0992e4a34faf125ed4fedd3407c4a23	0	0xc1bdb96700000000000000000000000091e108fa77ffa155c154c7fe8fcaeb83888255aa000000000000000000000000000000000000000000000000000000000000008000000000000000000000000000000000000000000000000000000000000000020000000000000000000000000000000000000000000000012a8debe820aeab040000000000000000000000000000000000000000000000000000000000000000	16112857	0xd9845d6da8a7e1403d7f86dc2b7877f07a884ab729d6bcf59a0dac973c739f28
33977	0xe408ac364336a834baef9241440352827588f2e45b8f5690055dfdff598875b3	0xd24400ae8bfebb18ca49be86258a3c749cf46853	0x5f65f7b609678448494de4c87521cdf6cef1e932	0	0xfa558b71000000000000000000000000056fd409e1d7a124bd7017459dfea2f387b6d5cd000000000000000000000000000000000000000000000000000000000000006000000000000000000000000000000000000000000000000000000000000000a00000000000000000000000000000000000000000000000000000000000000001000000000000000000000000b1ddb238d05d418024a3d02dbea6fb25c988db60000000000000000000000000000000000000000000000000000000000000000100000…	16112857	0xd9845d6da8a7e1403d7f86dc2b7877f07a884ab729d6bcf59a0dac973c739f28
33978	0xf9c3e2a233f6a62de6a3297751e72966d7a41313212e3a7d6c4532860aa9e66e	0x6f553e6028478cd56f85b888843d139fa4f5207d	0xdac17f958d2ee523a2206206994597c13d831ec7	0	0xa9059cbb000000000000000000000000bd2f80c1652d78eeedb4aba1731b373fabb93f95000000000000000000000000000000000000000000000000000000012a05f200	16112857	0xd9845d6da8a7e1403d7f86dc2b7877f07a884ab729d6bcf59a0dac973c739f28
33981	0xe85de6ca3613bd7badff9f23bb2f2ac53d0f9acfc219e717211f595e1d164e46	0x95a9bd206ae52c4ba8eecfc93d18eacdd41c88cc	0x5364895f81dd619ebe3f4f0ee6ea5afe7c01237e	3330000000000000	0x	16112857	0xd9845d6da8a7e1403d7f86dc2b7877f07a884ab729d6bcf59a0dac973c739f28
33982	0x5f161c57b34e996ff225c461738339b42f5ef0428ae7015b821bd5fd37b5c694	0x0c4ed2551f687d785866ebe7ed73bc2f4dd7c88e	0x15d4c048f83bd7e37d49ea4c83a07267ec4203da	0	0xa9059cbb000000000000000000000000d4c68828ba392beca6d3f33fdba37a23674d778800000000000000000000000000000000000000000000000000001e021587eab3	16112857	0xd9845d6da8a7e1403d7f86dc2b7877f07a884ab729d6bcf59a0dac973c739f28
33984	0x4d2985d1d3c6fa3512e781f6df7e8949ab9af770b49f506154deabc9a9ad3877	0xd1faf168a2e25c2bf15f856453e457f2f3c216ff	0x6ca3c6df93a6ce33548dbf08763dbcb21e07fd21	2000000000000000	0x	16112857	0xd9845d6da8a7e1403d7f86dc2b7877f07a884ab729d6bcf59a0dac973c739f28
33985	0x0c1126375f76e83e3c3606dbd7a0e54aece20d35ce709fb56fbecf4ededbbcb0	0x1be210e7990eff6c07cb8cadcb9d077063ac3614	0x82b1b382d8ffe6e477d520170e4aecf0a1263e66	2100000000000000	0x	16112857	0xd9845d6da8a7e1403d7f86dc2b7877f07a884ab729d6bcf59a0dac973c739f28
33987	0x8d5925c319075bd5b1f77ad09ad4756d7a45e4dae92f386bdd7da5dd77451df8	0x0c4ed2551f687d785866ebe7ed73bc2f4dd7c88e	0x15d4c048f83bd7e37d49ea4c83a07267ec4203da	0	0xa9059cbb000000000000000000000000d4c68828ba392beca6d3f33fdba37a23674d778800000000000000000000000000000000000000000000000000001e0221739326	16112857	0xd9845d6da8a7e1403d7f86dc2b7877f07a884ab729d6bcf59a0dac973c739f28
33989	0x3e9d9293389d1674a368c7318978e9b9280bf8b0ff3e208387e59b11b622a5a3	0x043ed3a18e640e5cc6ec571db07fa7a440234d74	0x3dd98c8a089dbcff7e8fc8d4f532bd493501ab7f	0	0xa9059cbb000000000000000000000000c77ed60b6eba9d31139d462e0171f08b7623415b0000000000000000000000000000000000000000000000000000004f63773c49	16112857	0xd9845d6da8a7e1403d7f86dc2b7877f07a884ab729d6bcf59a0dac973c739f28
33990	0xfd48644d3007cf92d664ec6c3c52b96ee1bf51afe021af4bfa19fa40e2766550	0xd24400ae8bfebb18ca49be86258a3c749cf46853	0xe3884f6810a1a7c66bbdbfa45684096dca6ab85a	3.87e+16	0x	16112857	0xd9845d6da8a7e1403d7f86dc2b7877f07a884ab729d6bcf59a0dac973c739f28
33995	0x2173474f6c077e42cdbdca71b7d414106958f7f2ef78146e20b44c259295718d	0x75e89d5979e4f6fba9f97c104c2f0afb3f1dcb88	0x808f0385f2c9c4e510f8c87061d3487e1420d3e8	3.9e+16	0x	16112857	0xd9845d6da8a7e1403d7f86dc2b7877f07a884ab729d6bcf59a0dac973c739f28
34000	0xd32bcac9c83527e192c6dc6bc3db00550182fc86a85ca2e1ee533d0ae76607a4	0x544f6de72a29405ef5e3365c58245e638cc44e19	0x7a250d5630b4cf539739df2c5dacb4c659f2488d	0	0x791ac9470000000000000000000000000000000000000000000845951614014849ffffff00000000000000000000000000000000000000000000000001030972c2c1d7c400000000000000000000000000000000000000000000000000000000000000a0000000000000000000000000544f6de72a29405ef5e3365c58245e638cc44e1900000000000000000000000000000000000000000000000000000000638cd59b000000000000000000000000000000000000000000000000000000000000000200000…	16112857	0xd9845d6da8a7e1403d7f86dc2b7877f07a884ab729d6bcf59a0dac973c739f28
34003	0xc12ea8fa7e1ebe7796999a90e03b3c93643bc7f16ddbca06e100e8701d2dea34	0xa203d6135eafc7d6f9435e5b22ddb8fbb7129b18	0xdac17f958d2ee523a2206206994597c13d831ec7	0	0xa9059cbb00000000000000000000000065a35df038a9092662d674c1d0caae1d14d7403200000000000000000000000000000000000000000000000000000000083e4a60	16112857	0xd9845d6da8a7e1403d7f86dc2b7877f07a884ab729d6bcf59a0dac973c739f28
34006	0xd6c4bc535a72425715903a992dae44075fcb1b6cbd94984045f8d814da65f1c9	0xdfd5293d8e347dfe59e90efd55b2956a1343963d	0xcac47b0a5e1c304cbcb2986f8dec048eab3a4a51	1.49e+16	0x	16112857	0xd9845d6da8a7e1403d7f86dc2b7877f07a884ab729d6bcf59a0dac973c739f28
34007	0x5cb728c13f5aadf233a8f22f024ce6e0fa0e6dc2bde65c16308fa4f664c36c01	0xc8fd0e30c664710eef2def6554095a584c811de0	0x68b3465833fb72a70ecdf485e0e4c7bd8665fc45	1.15e+16	0x5ae401dc00000000000000000000000000000000000000000000000000000000638cdc2300000000000000000000000000000000000000000000000000000000000000400000000000000000000000000000000000000000000000000000000000000001000000000000000000000000000000000000000000000000000000000000002000000000000000000000000000000000000000000000000000000000000000e4472b43f30000000000000000000000000000000000000000000000000028db3066eac…	16112857	0xd9845d6da8a7e1403d7f86dc2b7877f07a884ab729d6bcf59a0dac973c739f28
34008	0x7eebed731e512a05716644d7995b7b0497a60980f47f78d880735963ebd5b9c6	0x1be210e7990eff6c07cb8cadcb9d077063ac3614	0x8924e6b9440bcccbc547f09a2978a45df5f866b3	2100000000000000	0x	16112857	0xd9845d6da8a7e1403d7f86dc2b7877f07a884ab729d6bcf59a0dac973c739f28
34010	0xf5b477784de54af5e43fc8d66478547cb5f64a64b6ef490a88f7d05a8280980d	0xf7858da8a6617f7c6d0ff2bcafdb6d2eedf64840	0xe45b856ae9a10ee7a547d607bde2d3e1cdc8481b	1.46e+16	0x	16112857	0xd9845d6da8a7e1403d7f86dc2b7877f07a884ab729d6bcf59a0dac973c739f28
34011	0xcc63a5d124acfc13500b617b8ccff0be3e4ddafab6448e4c207938401589a88d	0x7c195d981abfdc3ddecd2ca0fed0958430488e34	0x0406e2946f9eafee444cf5f34946ac879d1643be	2.78e+16	0x	16112857	0xd9845d6da8a7e1403d7f86dc2b7877f07a884ab729d6bcf59a0dac973c739f28
34013	0x45d1c0477c5cbcf2e73b7cce691d0fd0a0c3f0f76a2fc5cea40cb193a6e2d881	0x74dec05e5b894b0efec69cdf6316971802a2f9a1	0xf25ce3948be40d37449c98cfdbc2e21bad9b55ac	5.8e+17	0x	16112857	0xd9845d6da8a7e1403d7f86dc2b7877f07a884ab729d6bcf59a0dac973c739f28
34014	0xbc056d16ff9a355322d0174b8b8eae32f7806bb30383cb6206323c3e5f6edfcd	0x28ffe35688ffffd0659aee2e34778b0ae4e193ad	0xd28863214422b01948c057b4735d37782a153989	1.1e+17	0x	16112857	0xd9845d6da8a7e1403d7f86dc2b7877f07a884ab729d6bcf59a0dac973c739f28
34016	0x9ed67fce9b24954cac239ace9a53723e716dab58ed54dd78f6b7826395db37fe	0xd24400ae8bfebb18ca49be86258a3c749cf46853	0x5f65f7b609678448494de4c87521cdf6cef1e932	0	0xfa558b710000000000000000000000000d8775f648430679a709e98d2b0cb6250d2887ef000000000000000000000000000000000000000000000000000000000000006000000000000000000000000000000000000000000000000000000000000000a00000000000000000000000000000000000000000000000000000000000000001000000000000000000000000369f578a18b59bb3a90125fc2e375b807ccfaf00000000000000000000000000000000000000000000000000000000000000000100000…	16112857	0xd9845d6da8a7e1403d7f86dc2b7877f07a884ab729d6bcf59a0dac973c739f28
34018	0xa8ab01e41e2ee7fae4e1e8580f2b8e053a758da029a9895cf965d8fceae2f433	0x3944610aeaf170c7eea9db92be195a63dfa21f5f	0x94ea4c3b679d96ed82aecbb9ca8f33567e4e1c58	0	0x42842e0e0000000000000000000000003944610aeaf170c7eea9db92be195a63dfa21f5f000000000000000000000000605110c34a93179dbcc090c09036728f5b7c7bb4000000000000000000000000000000000000000000000000000000000000038e360c6ebe	16112857	0xd9845d6da8a7e1403d7f86dc2b7877f07a884ab729d6bcf59a0dac973c739f28
34019	0x44e4f229aaa0e6fc5b38fa1ffd5805bafa7b4a2abc4e249c69e61cdbad05ecce	0x5dfa7335a369b801621dbc0a6b6ffb7dcaa22a7a	0xa0255f67be34fde4003eb8896e777721e4124034	1.1e+16	0x	16112857	0xd9845d6da8a7e1403d7f86dc2b7877f07a884ab729d6bcf59a0dac973c739f28
34020	0xd5e401135aa4acbf810494e2dfa507c6316324a2764d714f00652562212fa702	0xd24400ae8bfebb18ca49be86258a3c749cf46853	0x5f65f7b609678448494de4c87521cdf6cef1e932	0	0xfa558b71000000000000000000000000f629cbd94d3791c9250152bd8dfbdf380e2a3b9c000000000000000000000000000000000000000000000000000000000000006000000000000000000000000000000000000000000000000000000000000000a00000000000000000000000000000000000000000000000000000000000000001000000000000000000000000493c486807d771401fecf2599e57589eaedb8755000000000000000000000000000000000000000000000000000000000000000100000…	16112857	0xd9845d6da8a7e1403d7f86dc2b7877f07a884ab729d6bcf59a0dac973c739f28
34021	0xafe9be5f0e377ce7aab1599cf60c7d0a2f26413603cfacc9863dedb9be955f32	0xf7858da8a6617f7c6d0ff2bcafdb6d2eedf64840	0x4fe221ca6542fc2c84fd7f4a2e1da03b86c464e7	7.88e+16	0x	16112857	0xd9845d6da8a7e1403d7f86dc2b7877f07a884ab729d6bcf59a0dac973c739f28
34024	0xfa64495094e556e7cf70758e4b27b40e77d8ec3cc69cd88e59f2bfc9f99e4eb0	0x503828976d22510aad0201ac7ec88293211d23da	0x811e23583899f61e29a38d73ef0952074305e895	8.72e+16	0x	16112857	0xd9845d6da8a7e1403d7f86dc2b7877f07a884ab729d6bcf59a0dac973c739f28
34025	0x85dd93882a346c018dd5eb7cef43217c732dbd93bf3359ed9a9059a779a46135	0xdafea492d9c6733ae3d56b7ed1adb60692c98bc5	0xa34e06927bc41a9305be73d0779b4f38b7a1adb3	5.09e+16	0x	16112857	0xd9845d6da8a7e1403d7f86dc2b7877f07a884ab729d6bcf59a0dac973c739f28
34026	0x3e4ad52d8dc9f80f7bec44d7096601d872cddee85a4cb946785566bed1806c84	0x123b5c9b3b55b14b660ff3fe69868eefd1f38698	0x7140400c663da4c4fe6adbc26340fc17827c5481	0	0xa22cb4650000000000000000000000001e0049783f008a0085193e00003d00cd54003c710000000000000000000000000000000000000000000000000000000000000001	16112857	0xd9845d6da8a7e1403d7f86dc2b7877f07a884ab729d6bcf59a0dac973c739f28
34027	0x7bc3af2c1b20628552ab068303b40e7d0f15a44f5bac49a7b1eefcb5d0fe5141	0x75e89d5979e4f6fba9f97c104c2f0afb3f1dcb88	0xbe9ab37a414c517b2be2bfa5945665bb07379054	0	0xa9059cbb00000000000000000000000065e42860aad3d25ccb1b16bcad4216db1b210aa100000000000000000000000000000000000000000000051d0ffcc0bb064a0000	16112857	0xd9845d6da8a7e1403d7f86dc2b7877f07a884ab729d6bcf59a0dac973c739f28
34028	0x45bef6984cdbbd5c19bd883073811be9895ae2291a526da8ecf362f1a84dc81d	0x1be210e7990eff6c07cb8cadcb9d077063ac3614	0xc42cbadff1eca4a6cffca611fd0246c1383f53a3	2100000000000000	0x	16112857	0xd9845d6da8a7e1403d7f86dc2b7877f07a884ab729d6bcf59a0dac973c739f28
34031	0x57e389df2428d665175fab608029b24d9b921bf769362f1d25c0eb42ec29b614	0x1be210e7990eff6c07cb8cadcb9d077063ac3614	0x3af74330bf0994323a276a9e5365e87080b28176	2100000000000000	0x	16112857	0xd9845d6da8a7e1403d7f86dc2b7877f07a884ab729d6bcf59a0dac973c739f28
34032	0xcefcc5bfb6cd931859ed9a692985371deff49f45f511baee49e234858082fc85	0x69d6fe69e0f020240254d2b76d41179a1871caa2	0x3c4b6e6e1ea3d4863700d7f76b36b7f3d3f13e3d	0	0xa9059cbb000000000000000000000000a8bc7a0d8c503c6022fe669acbc9b3add5b352fa000000000000000000000000000000000000000000000000000000023a24603d	16112857	0xd9845d6da8a7e1403d7f86dc2b7877f07a884ab729d6bcf59a0dac973c739f28
34034	0x8fab884311c89a8fd8f7e62f3da5cb4ff71a7652fe1e9f9e4aaf8a37a6ee7f27	0x7830c87c02e56aff27fa8ab1241711331fa86f43	0xa9d1e08c7793af67e9d92fe308d5697fb81d3e43	0	0xca350aa60000000000000000000000000000000000000000000000000000000000000040000000000000000000000000000000000000000000000000000000000003d0900000000000000000000000000000000000000000000000000000000000000007000000000000000000000000a0b86991c6218b36c1d19d4a2e9eb0ce3606eb48000000000000000000000000c5ed8e759485f4caf1ed6059a75f8372c06514d2000000000000000000000000000000000000000000000000000000001efc1bf000000…	16112857	0xd9845d6da8a7e1403d7f86dc2b7877f07a884ab729d6bcf59a0dac973c739f28
34036	0x5e0d0858140f982d48bb2cc991e1c4425808dbeeab81cfa43985b8e6b5571814	0xf7858da8a6617f7c6d0ff2bcafdb6d2eedf64840	0x50a68bf027fdb8f7769f2f7703d6d8f82ec64bae	2.19e+16	0x	16112857	0xd9845d6da8a7e1403d7f86dc2b7877f07a884ab729d6bcf59a0dac973c739f28
34038	0x62593fb9cd46ec6bedeb41a234268fd552992a2f748d4648dd23727198123c2c	0x77696bb39917c91a0c3908d577d5e322095425ca	0xd7203014427df7cec3c95c1d8ccc10255e3363d7	2.2e+16	0x	16112857	0xd9845d6da8a7e1403d7f86dc2b7877f07a884ab729d6bcf59a0dac973c739f28
34040	0x99acf520f6c37e00cbcd82ec8508c456eb7a62646cdfc0edec52730c989df8d2	0xf73fe54f16c469d13873a86559fdb7ff240264fd	0x68b3465833fb72a70ecdf485e0e4c7bd8665fc45	0	0x5ae401dc00000000000000000000000000000000000000000000000000000000638cdc17000000000000000000000000000000000000000000000000000000000000004000000000000000000000000000000000000000000000000000000000000000020000000000000000000000000000000000000000000000000000000000000040000000000000000000000000000000000000000000000000000000000000016000000000000000000000000000000000000000000000000000000000000000e4472b4…	16112857	0xd9845d6da8a7e1403d7f86dc2b7877f07a884ab729d6bcf59a0dac973c739f28
34041	0x8765fda7dfc7d48d3b41b8a4b98eea3c20838ff13abd8a3d4bc00dfdc2e88975	0x8a0bd3b6f7387221b3366af0050557d07019687f	0x612e2daddc89d91409e40f946f9f7cfe422e777e	0	0x0f828159000000000000000000000000000000000000000000000000000000000000006000000000000000000000000000000000000000000000000000000000000000a00000000000000000000000000000000000000000000000000012b29f89267439000000000000000000000000000000000000000000000000000000000000000d44697374616e742048696c6c7300000000000000000000000000000000000000000000000000000000000000000000000000000000000000000000000000000744495…	16112857	0xd9845d6da8a7e1403d7f86dc2b7877f07a884ab729d6bcf59a0dac973c739f28
34042	0x9a79575e36af88aff04c91ec983e72f1822b363496cd048d7b9d0da650b56cfe	0x151b381058f91cf871e7ea1ee83c45326f61e96d	0xa515f76594b32164f9f184f4c9b56de1e6db20d6	8.05e+16	0x	16112857	0xd9845d6da8a7e1403d7f86dc2b7877f07a884ab729d6bcf59a0dac973c739f28
34044	0x5468ffa155661436c2f6e0def2acd9490711357551fab06c4c2cc0a7b0e269a8	0x80c67432656d59144ceff962e8faf8926599bcf8	0xb23a7f7c297c52648565803786533caa82a9f645	2.52e+16	0x	16112857	0xd9845d6da8a7e1403d7f86dc2b7877f07a884ab729d6bcf59a0dac973c739f28
34046	0x1d45cfe95e805751a94efdce522ddefbf9ccfc62b683c5d338dcc02555f50cf4	0x3cd751e6b0078be393132286c442345e5dc49699	0x139bb66a6f7d20f201ce52d14991fb0023acf635	2.35e+16	0x	16112857	0xd9845d6da8a7e1403d7f86dc2b7877f07a884ab729d6bcf59a0dac973c739f28
34047	0xd84faabbadff5e024e33c7af0f0f7c81e0e51b60573f2771118abe256ab812b3	0xb739d0895772dbb71a89a3754a160269068f0d45	0x08454c7ccb7bda6040b836307e2470e8eb9d7373	4.48e+16	0x	16112857	0xd9845d6da8a7e1403d7f86dc2b7877f07a884ab729d6bcf59a0dac973c739f28
34048	0x0333d2c9f50ea9baee702c45b0068c655ba2b513010bb72a09cbf37ea2e9b0f9	0x04bd3446d74b3190890cbc825835ec6637c74ae8	0x3caca7b48d0573d793d3b0279b5f0029180e83b6	0	0xb87b0b4c0000000000000000000000001ab0cb2193ad2083745eb2cb9a7ddd8ea4d518df0000000000000000000000000000000000000000000000000000000000000060000000000000000000000000eeeeeeeeeeeeeeeeeeeeeeeeeeeeeeeeeeeeeeee000000000000000000000000000000000000000000000000000000000000054470dff1dd000000000000000000000000802fa63a58fff59f0015a250073fc09d02987e2b0000000000000000000000000000000000000000000000000000000000000…	16112857	0xd9845d6da8a7e1403d7f86dc2b7877f07a884ab729d6bcf59a0dac973c739f28
34049	0xefd932c59a5461f530bd6426db12b06d23e16068613c81f795756271d56a943e	0xa659b523f20cb9508004b92e72752a6387e3dfe1	0x908d5cc2e8941b72e86e6147c5e623dae9c27717	0	0xf242432a000000000000000000000000d144f91bb374d29a5b31a469a122347ecb69ac24000000000000000000000000a659b523f20cb9508004b92e72752a6387e3dfe10000000000000000000000000000000000000000000000000000000000000003000000000000000000000000000000000000000000000000000000000000000100000000000000000000000000000000000000000000000000000000000000a0000000000000000000000000000000000000000000000000000000000000002068717…	16112857	0xd9845d6da8a7e1403d7f86dc2b7877f07a884ab729d6bcf59a0dac973c739f28
34050	0x37601f6a7ec06f6a26e7a789aff8fbb57abb6afe5b41b878f7229902c818c203	0x0c4ed2551f687d785866ebe7ed73bc2f4dd7c88e	0x15d4c048f83bd7e37d49ea4c83a07267ec4203da	0	0xa9059cbb000000000000000000000000d4c68828ba392beca6d3f33fdba37a23674d77880000000000000000000000000000000000000000000000000000074cf1644a7b	16112857	0xd9845d6da8a7e1403d7f86dc2b7877f07a884ab729d6bcf59a0dac973c739f28
34052	0x270813a45e839f46195ee6107d3d1dad0a46cd71c041c0ce4a2207226fe41383	0xa9831d89c4067bf7518efbcb6351ef6dd0059f33	0xdac17f958d2ee523a2206206994597c13d831ec7	0	0x23b872dd000000000000000000000000079388e0b5aa2ef1da08174de5af13fd37a7085f0000000000000000000000003f114545b43c1781352f1a1f5f147dbcc01b959f0000000000000000000000000000000000000000000000000000000000000000	16112857	0xd9845d6da8a7e1403d7f86dc2b7877f07a884ab729d6bcf59a0dac973c739f28
34056	0x3f95125c3eee2f7ba70d1853a98d63aea858b14df4de0bc5c1b8882f8eae7bc4	0x75e89d5979e4f6fba9f97c104c2f0afb3f1dcb88	0xbe9ab37a414c517b2be2bfa5945665bb07379054	0	0xa9059cbb000000000000000000000000d0be1fded5d964619b92b3672c08c43305529be00000000000000000000000000000000000000000000014f26d0e351639da0000	16112857	0xd9845d6da8a7e1403d7f86dc2b7877f07a884ab729d6bcf59a0dac973c739f28
34058	0x28a006d317a25b3db2b1af36872627b41541c723a4a5692e0813bc043d6bbcda	0xb739d0895772dbb71a89a3754a160269068f0d45	0x396d029c373a7fd0e486e7ef5dac6c7b6b1a65be	8.03e+16	0x	16112857	0xd9845d6da8a7e1403d7f86dc2b7877f07a884ab729d6bcf59a0dac973c739f28
34059	0x75e216ac71a5c027793b73dfceae04ee544cc654d6e34e8faf2b33a137f035b0	0x7c019fcb24bd8ab29a8a7b209291f486d1d3cff3	0x34d85c9cdeb23fa97cb08333b511ac86e1c4e258	0	0xa22cb46500000000000000000000000000000000000111abe46ff893f3b2fdf1f759a8a80000000000000000000000000000000000000000000000000000000000000001	16112857	0xd9845d6da8a7e1403d7f86dc2b7877f07a884ab729d6bcf59a0dac973c739f28
34060	0x1ab42b6fe55659dc25a8f0cd13f29abd33868493eb1ad376d29487f6ce0a3e3c	0x71660c4005ba85c37ccec55d0c4493e66fe775d3	0x3bd58fedaa5c2168b2f7b082c7e5a0dbb6ba2d44	4.05e+16	0x	16112857	0xd9845d6da8a7e1403d7f86dc2b7877f07a884ab729d6bcf59a0dac973c739f28
34062	0xf02ed247102d77d7e2edc605542c19d8f16c3429485d10a8720c5d33e3479fe0	0xd2c5b711e50c592a46f96c6e76e714178fd9ad89	0x9507c04b10486547584c37bcbd931b2a4fee9a41	16112857	0x330000000000000000225f585424000000065bdb01d4060084ce010201f4ff010088e6a0c2ddd26feeb64f039a2c41296fcb3f5640a0b86991c6218b36c1d19d4a2e9eb0ce3606eb48c02aaa39b223fe8d0a0e5c4f27ead9083c756cc203	16112857	0xd9845d6da8a7e1403d7f86dc2b7877f07a884ab729d6bcf59a0dac973c739f28
34063	0xcb846cb73a3d2527b9f3f45d8a2654918859ab20bc4d4b4816aceb7ae6abfd92	0x0ab3fbc9025ece0ea4e0f9d29fbaa94b70923e37	0x79c9d15c62bb27c56c92696fb72b35c408ee0b1a	3.53e+17	0x	16112857	0xd9845d6da8a7e1403d7f86dc2b7877f07a884ab729d6bcf59a0dac973c739f28
34064	0x011e93e419672a0d457d34bfcb4d403991e9b997191fd5ac17c899f80eee3a34	0xd5cf0cb9a8df9b46f077f561d8b76c34a69bd82f	0x585c3d4da9b533c7e3df8ac7356c882859298cee	0	0x11f6bff2000000000000000000000000000000000000000000000000061e60a8c5a73594000000000000000000000000c02aaa39b223fe8d0a0e5c4f27ead9083c756cc2000000000000000000000000dc98556ce24f007a5ef6dc1ce96322d65832a819000000000000000000000000429881672b9ae42b8eba0e26cd9c73711b891ca5000000000000000000000000cbf04eac5a3443941ce6a41ff38d7e238406f0e400000000000000000000000000000000000000000000001f939c0be9b4990000	16112857	0xd9845d6da8a7e1403d7f86dc2b7877f07a884ab729d6bcf59a0dac973c739f28
34065	0xfcc951620dc7b0d11b3633f6da64cd29ca70d32448f5f9a33986fb06624b321b	0x56eddb7aa87536c09ccc2793473599fd21a8b17f	0xe0618317af7302073e7aeac729eda78f8b039979	9230000000000000	0x	16112857	0xd9845d6da8a7e1403d7f86dc2b7877f07a884ab729d6bcf59a0dac973c739f28
34066	0x61405372e0d89020e5e1987e3b821b2d87a91c56a0b0516f924ec51543121f25	0x1b9db4ba7e3ea7e7a211f5d0e43293f4793aaf41	0xf203ca1769ca8e9e8fe1da9d147db68b6c919817	0	0xbcf64e05000000000000000000000000000000000000000000000045e3f01c42c05d0000288816e15a692a42bfab1ee206ce0656ee3fe871000000000000000000000000	16112857	0xd9845d6da8a7e1403d7f86dc2b7877f07a884ab729d6bcf59a0dac973c739f28
34067	0x5e083692fcb7af08ae7271c4addf494a9ae99803fe4cbaada5eeb4493cf1d5ac	0x21a31ee1afc51d94c2efccaa2092ad1028285549	0xdac17f958d2ee523a2206206994597c13d831ec7	0	0xa9059cbb000000000000000000000000d0ac77a9cc53e0795b495ba679ed0126004901a1000000000000000000000000000000000000000000000000000000007423fdcd	16112857	0xd9845d6da8a7e1403d7f86dc2b7877f07a884ab729d6bcf59a0dac973c739f28
34068	0x08b72d87e3b99aef972f09cfcf3d83827386b9f5660446cd5d3092f6311c7f99	0x6dfc34609a05bc22319fa4cce1d1e2929548c0d7	0xdac17f958d2ee523a2206206994597c13d831ec7	0	0xa9059cbb000000000000000000000000735d4be25f889664654b01e81b688f80370937480000000000000000000000000000000000000000000000000000000002fae5a6	16112857	0xd9845d6da8a7e1403d7f86dc2b7877f07a884ab729d6bcf59a0dac973c739f28
34072	0xa86d8e1e459aed86c168d37532a647d59046d45b38ecf475ad5492e50950c03f	0xdbaf1eb6cde095ed464b99065e73749abcecb6a0	0xdac17f958d2ee523a2206206994597c13d831ec7	0	0xa9059cbb00000000000000000000000061e070ed528b2c0423627d6f878e5aa3bbd1a06b0000000000000000000000000000000000000000000000000000000045243200	16112857	0xd9845d6da8a7e1403d7f86dc2b7877f07a884ab729d6bcf59a0dac973c739f28
34073	0xad3157c06d6cfbb2808c2b99149d5d11ef2d95e7c182596dc1db084a2f7f0304	0xdd782574fb6fecfe09bec1ea31571c7828e04c47	0xa0b86991c6218b36c1d19d4a2e9eb0ce3606eb48	0	0x095ea7b300000000000000000000000064192819ac13ef72bf6b5ae239ac672b43a9af08ffffffffffffffffffffffffffffffffffffffffffffffffffffffffffffffff	16112857	0xd9845d6da8a7e1403d7f86dc2b7877f07a884ab729d6bcf59a0dac973c739f28
34074	0xd1b575baee85f6af96bb0827736fd913d97ef8b1214b6b3cf091d730c2296aa4	0x6e27eaadce8c04c3ce85d274d26f9d4f184e9d1f	0x233f355e60e33d313c58e0899778ad4928aec5f9	0	0x095ea7b300000000000000000000000068b3465833fb72a70ecdf485e0e4c7bd8665fc45ffffffffffffffffffffffffffffffffffffffffffffffffffffffffffffffff	16112857	0xd9845d6da8a7e1403d7f86dc2b7877f07a884ab729d6bcf59a0dac973c739f28
34075	0x321dfd778baeccbbe183a2ff758a4b4557b7a97393c45c728e6f49e04b732fae	0xd24400ae8bfebb18ca49be86258a3c749cf46853	0x5f65f7b609678448494de4c87521cdf6cef1e932	0	0xfa558b710000000000000000000000004fabb145d64652a948d72533023f6e7a623c7c53000000000000000000000000000000000000000000000000000000000000006000000000000000000000000000000000000000000000000000000000000000a000000000000000000000000000000000000000000000000000000000000000010000000000000000000000007a245c2c98c616816dfca7adfa4dc5d5f152d9e5000000000000000000000000000000000000000000000000000000000000000100000…	16112857	0xd9845d6da8a7e1403d7f86dc2b7877f07a884ab729d6bcf59a0dac973c739f28
34076	0xd087167d037a11705ce2c7de98d315324c77f63966f9229746f9fdfe665ea756	0x1be210e7990eff6c07cb8cadcb9d077063ac3614	0xaf19c4424741064702d0c01e4eb25e90f53e6878	2100000000000000	0x	16112857	0xd9845d6da8a7e1403d7f86dc2b7877f07a884ab729d6bcf59a0dac973c739f28
34077	0xd9c5a686c022f70e80d47d1e2d0acbe07e9a31fc7375a8c033f946c8f217a19f	0x7aa24415db351d729807dd7c84086e97e26a8e50	0x7a250d5630b4cf539739df2c5dacb4c659f2488d	0	0x791ac94700000000000000000000000000000000000000000002b51d915346191fe743ff0000000000000000000000000000000000000000000000000066cf0c4ccedb9e00000000000000000000000000000000000000000000000000000000000000a00000000000000000000000007aa24415db351d729807dd7c84086e97e26a8e5000000000000000000000000000000000000000000000000000000000638cd594000000000000000000000000000000000000000000000000000000000000000200000…	16112857	0xd9845d6da8a7e1403d7f86dc2b7877f07a884ab729d6bcf59a0dac973c739f28
34078	0x5ecdce7c27dd411d5decf419f47e6c96ca8717cb646f56c8ca1fb5147140e693	0xd24400ae8bfebb18ca49be86258a3c749cf46853	0x5f65f7b609678448494de4c87521cdf6cef1e932	0	0xfa558b710000000000000000000000003845badade8e6dff049820680d1f14bd3903a5d0000000000000000000000000000000000000000000000000000000000000006000000000000000000000000000000000000000000000000000000000000000a000000000000000000000000000000000000000000000000000000000000000010000000000000000000000000f5f7104027d199004180e91f9a29dc02f090861000000000000000000000000000000000000000000000000000000000000000100000…	16112857	0xd9845d6da8a7e1403d7f86dc2b7877f07a884ab729d6bcf59a0dac973c739f28
34079	0x0b63d58a7fc4900d9dcefd0f970aa1f39551cd8dbd30bbfbdd3da5ed582c2feb	0xb8209dc29464f655a41e88e55a219ef2166f76c8	0x68b3465833fb72a70ecdf485e0e4c7bd8665fc45	0	0x5ae401dc00000000000000000000000000000000000000000000000000000000638cdc23000000000000000000000000000000000000000000000000000000000000004000000000000000000000000000000000000000000000000000000000000000020000000000000000000000000000000000000000000000000000000000000040000000000000000000000000000000000000000000000000000000000000016000000000000000000000000000000000000000000000000000000000000000e404e45…	16112857	0xd9845d6da8a7e1403d7f86dc2b7877f07a884ab729d6bcf59a0dac973c739f28
34080	0xea462a2c2fc571e1d49240833e1c271a5172fafa7f1aba3d60c2cf1e468d76f7	0x2af6b7d384aadb782d6e59b5456df2aebb33851c	0xb7a478d27f83438f1537f7fcb8785e6d5c77d68b	0	0x42842e0e0000000000000000000000002af6b7d384aadb782d6e59b5456df2aebb33851c000000000000000000000000db1b82bc80e84d23726307caababbd4b7d2a037e000000000000000000000000000000000000000000000000000000000000015c360c6ebe	16112857	0xd9845d6da8a7e1403d7f86dc2b7877f07a884ab729d6bcf59a0dac973c739f28
34081	0x96c1f3ef43580bf0608eeb6a63eb32af0200f659e08040dbe9d9816b0c0ff0b6	0xacb76875356a8c465103fe4aa15a0502937322ce	0xc02aaa39b223fe8d0a0e5c4f27ead9083c756cc2	0	0x2e1a7d4d000000000000000000000000000000000000000000000000016d380e2ae90000	16112857	0xd9845d6da8a7e1403d7f86dc2b7877f07a884ab729d6bcf59a0dac973c739f28
34082	0x11f2f7648b977310ade5609af9ce3a9c17258555beb449dca7c97a8d13dc06a9	0xa9831d89c4067bf7518efbcb6351ef6dd0059f33	0xdac17f958d2ee523a2206206994597c13d831ec7	0	0x23b872dd000000000000000000000000e56680644c7fb0ba42f510132ba628e386ee99e20000000000000000000000007f53c6e41670d48e71932fdb86e1b2c3ce58bdf60000000000000000000000000000000000000000000000000000000000000000	16112857	0xd9845d6da8a7e1403d7f86dc2b7877f07a884ab729d6bcf59a0dac973c739f28
34085	0x55eb375e719c64f78b8b3477f53e68e3c01251bbe93e9d091ba20f556528bb62	0xa9831d89c4067bf7518efbcb6351ef6dd0059f33	0xdac17f958d2ee523a2206206994597c13d831ec7	0	0x23b872dd0000000000000000000000002c230893f7b0098a994479ee9866eb62e0e602ac000000000000000000000000d6db1911ea388b206bad6d281ae6ffbd110187e10000000000000000000000000000000000000000000000000000000000000000	16112857	0xd9845d6da8a7e1403d7f86dc2b7877f07a884ab729d6bcf59a0dac973c739f28
34086	0xeb47cfa6ba9a23d38144928cbfcb61291854f147668a4a31ba1abc6933a35567	0x3d67f4ea34f70ad862ee64310e99b3cdaab41ef3	0x3819f64f282bf135d62168c1e513280daf905e06	0	0xf812b9a400000000000000000000000000000000000000000000000000000000000000000000000000000000000000000000000000000000000000000000000000059fc8	16112857	0xd9845d6da8a7e1403d7f86dc2b7877f07a884ab729d6bcf59a0dac973c739f28
34091	0x5dba322ba6a2190ea189602cbb3e3e71e4e89628c16d8940270feddd8ed717c4	0xe3edfd20b9cc6efa63dd8ce7192bd9e2a6cc283e	0xdff4a1c63cc159908e2d0d61a2d0ed77cd80f862	7380000000000000	0x	16112857	0xd9845d6da8a7e1403d7f86dc2b7877f07a884ab729d6bcf59a0dac973c739f28
34092	0xf73c8431be426fd9781cb8eb53079e04138ef0c9a792d7c446352b04b59c66f1	0x42189b841287654e93fc1b2363dc4cc6c066f9a8	0x303dfca16294e60459ed569b1ca680619d7b64f9	0	0xa22cb4650000000000000000000000001e0049783f008a0085193e00003d00cd54003c710000000000000000000000000000000000000000000000000000000000000001	16112857	0xd9845d6da8a7e1403d7f86dc2b7877f07a884ab729d6bcf59a0dac973c739f28
34093	0x3c3f0a8abf14b3f8933aaf022f7892ebb9df57e2c3e296eb4779f25a699b954f	0x87cbc48075d7aa1760ac71c41e8bc289b6a31f56	0xeaf6d1a27cf8029e24c0cffbdc18d318d443496d	4.69e+17	0x	16112857	0xd9845d6da8a7e1403d7f86dc2b7877f07a884ab729d6bcf59a0dac973c739f28
34094	0x0dcd4270c62414167ecce28caf40fc244829d73553d051226ad57ef46ef756e9	0x213ceb5fc74c6573ea850a9a59c6d2884b0c4f76	0x82d58948375fceb57b01153611ff7b1c63f32236	9e+16	0x	16112857	0xd9845d6da8a7e1403d7f86dc2b7877f07a884ab729d6bcf59a0dac973c739f28
34096	0xc1745deb593eaa8a3eaca60e199e9397f8c483bd498a01c354d86aab8741eda6	0x00e484da1156202e9dd341ad7ea9c908bb919e96	0xeeeec6476073778077b40a73fe32e23a9876cab4	7.95e+16	0x2b66d72e000000000000000000000000000000000000000000000000000000000000002000000000000000000000000000000000000000000000000000000000000000ee65794a68624763694f694a46557a49314e694973496d74705a434936496a64684e6a526c5a6d51314c544a694e4463744e475a6a5a6931684f4463784c5445785a6d59354f5451345954646a4f434a392e436763784d6a55334c6a673445674e56553051614a474d7a5a6a4d784e7a45774c544134596a63744e446b314e6930344e5…	16112857	0xd9845d6da8a7e1403d7f86dc2b7877f07a884ab729d6bcf59a0dac973c739f28
34097	0x5399ec16f321050b1f253f2cfe8e934f19d34464cc386132976182d115620159	0x198d63301fc216b15fe625a5d5080169d656b648	0x9249608b274231f1d66c17bc3ecc531dfc39b2a3	5730000000000000	0x	16112857	0xd9845d6da8a7e1403d7f86dc2b7877f07a884ab729d6bcf59a0dac973c739f28
34100	0x027f60f14553de21681dabaad8121fb9c47656f467aedb6076d2ca0a11a09c19	0xae2d4617c862309a3d75a0ffb358c7a5009c673f	0xa24787320ede4cc19d800bf87b41ab9539c4da9d	0	0xc658695c000000000000000000000000a0b86991c6218b36c1d19d4a2e9eb0ce3606eb48000000000000000000000000bebf1c31e05a62aa8d07003af177f07891889ad70000000000000000000000007ba8674fe99624bc2f11bc620d0f9b5d55060b8c00000000000000000000000000000000000000000000000000000014f47ca16800000000000000000000000000000000000000000000000000000000000000a0000000000000000000000000000000000000000000000000000000000000000000000…	16112857	0xd9845d6da8a7e1403d7f86dc2b7877f07a884ab729d6bcf59a0dac973c739f28
34101	0xe138c499caf37e0c18f81a38e2525e1a4936caa39d37b15ec35e03a029f0f5c9	0xba88be0718a5d8e064298baecec353a94e45171a	0x68b3465833fb72a70ecdf485e0e4c7bd8665fc45	0	0x5ae401dc00000000000000000000000000000000000000000000000000000000638cdbcf000000000000000000000000000000000000000000000000000000000000004000000000000000000000000000000000000000000000000000000000000000020000000000000000000000000000000000000000000000000000000000000040000000000000000000000000000000000000000000000000000000000000016000000000000000000000000000000000000000000000000000000000000000e4472b4…	16112857	0xd9845d6da8a7e1403d7f86dc2b7877f07a884ab729d6bcf59a0dac973c739f28
34103	0x58d3661788c3616e97ca966d7efaa05cb6669da586709298ee20bf23b32b21c9	0xd24400ae8bfebb18ca49be86258a3c749cf46853	0x5f65f7b609678448494de4c87521cdf6cef1e932	0	0xfa558b71000000000000000000000000f629cbd94d3791c9250152bd8dfbdf380e2a3b9c000000000000000000000000000000000000000000000000000000000000006000000000000000000000000000000000000000000000000000000000000000a000000000000000000000000000000000000000000000000000000000000000010000000000000000000000007790abd8f1c8bdd1ab9b095ce4b6c2b489825bf1000000000000000000000000000000000000000000000000000000000000000100000…	16112857	0xd9845d6da8a7e1403d7f86dc2b7877f07a884ab729d6bcf59a0dac973c739f28
34106	0x5c822cb7ee5b16248861748761a9622850dac59aeabed01669d1a77378174941	0x8216874887415e2650d12d53ff53516f04a74fd7	0x3a5bc2558c7df30005507eb2ef542c1bb000aa62	8.02e+16	0x	16112857	0xd9845d6da8a7e1403d7f86dc2b7877f07a884ab729d6bcf59a0dac973c739f28
34107	0x86c851c855a3db36441ca7ecdb33bf8f5f8365cb1236b8eb1fbdede9714b1fda	0x15f3b09491133a5793928dc9587738919ccec855	0xdac17f958d2ee523a2206206994597c13d831ec7	0	0xa9059cbb000000000000000000000000c139c0459d5e4f61fc876c19f6ca3e0dcdb447a000000000000000000000000000000000000000000000000000000000000f4240	16112857	0xd9845d6da8a7e1403d7f86dc2b7877f07a884ab729d6bcf59a0dac973c739f28
34108	0x24620c2cc169ebd16f18390349cbfbf4cb756430e45c402a6338c0451952d0bf	0xeb2629a2734e272bcc07bda959863f316f4bd4cf	0xe234758af358001800908fa067e6f3b211a5388f	7.88e+16	0x	16112857	0xd9845d6da8a7e1403d7f86dc2b7877f07a884ab729d6bcf59a0dac973c739f28
34109	0x4b02c1666db2b3f68336824a8cf419a762850221265b5e1d077cadb17d43be3f	0x21a31ee1afc51d94c2efccaa2092ad1028285549	0xdc76800b85fc1c656909d57cf5882a3ea6dbd777	1.73e+17	0x	16112857	0xd9845d6da8a7e1403d7f86dc2b7877f07a884ab729d6bcf59a0dac973c739f28
34110	0x0fc1c7500bdeca1b0589cfdb83ef01fe36066c53d01468155ffe056387889ad8	0xdbb79226b2a0b23e73955acf6a96d0729e0335fe	0xf89d7b9c864f589bbf53a82105107622b35eaa40	7.97e+16	0x	16112857	0xd9845d6da8a7e1403d7f86dc2b7877f07a884ab729d6bcf59a0dac973c739f28
34111	0x47b3791d39e8bea028cb889774ed75ba489d48e99b63eedb0461fed67c9668d1	0x9696f59e4d72e237be84ffd425dcad154bf96976	0x673d1d29b4f4466083045c8042cafa0cec081271	1.95e+16	0x	16112857	0xd9845d6da8a7e1403d7f86dc2b7877f07a884ab729d6bcf59a0dac973c739f28
34112	0x2bed01fb3ac620c89dfbccb07d8d86f885cae974156384db71dc5c720a1ccbc1	0xd24400ae8bfebb18ca49be86258a3c749cf46853	0x5f65f7b609678448494de4c87521cdf6cef1e932	0	0xfa558b710000000000000000000000000d8775f648430679a709e98d2b0cb6250d2887ef000000000000000000000000000000000000000000000000000000000000006000000000000000000000000000000000000000000000000000000000000000a0000000000000000000000000000000000000000000000000000000000000000100000000000000000000000021227e2b96672ab28f3f8106708ce504a5124197000000000000000000000000000000000000000000000000000000000000000100000…	16112857	0xd9845d6da8a7e1403d7f86dc2b7877f07a884ab729d6bcf59a0dac973c739f28
34113	0x759d70ed8c46a4ddd939fae38329d6fc171d2b59e4c6b3d1e74dc0a703d170de	0x88c0066a7e2da0481ace8ee3cd51cd0e4f6111fc	0xb50562b3c0e4f3f219fc2f995149ca58fe303c22	3000000000000000	0x	16112857	0xd9845d6da8a7e1403d7f86dc2b7877f07a884ab729d6bcf59a0dac973c739f28
34114	0x45ba654099651abb53cff04db54fbbcff9d92da585a1b954fdcdc84158f4b68e	0x7830c87c02e56aff27fa8ab1241711331fa86f43	0xa9d1e08c7793af67e9d92fe308d5697fb81d3e43	0	0x1a1da075000000000000000000000000000000000000000000000000000000000000004000000000000000000000000000000000000000000000000000000000000156940000000000000000000000000000000000000000000000000000000000000018000000000000000000000000b62a809f456f8f8903361bdf066f123ff9bbb21d000000000000000000000000000000000000000000000000001c3df93b5d0000000000000000000000000000201cc9b92e3ca0d864563bfa198ec88700d8ff4a00000…	16112857	0xd9845d6da8a7e1403d7f86dc2b7877f07a884ab729d6bcf59a0dac973c739f28
34115	0x3a521e181de804fbf5999650c5a41ac0b5397c05a3c84a0dee4b350411b80a66	0x0c4ed2551f687d785866ebe7ed73bc2f4dd7c88e	0x15d4c048f83bd7e37d49ea4c83a07267ec4203da	0	0xa9059cbb000000000000000000000000d4c68828ba392beca6d3f33fdba37a23674d778800000000000000000000000000000000000000000000000000001e02099c2495	16112857	0xd9845d6da8a7e1403d7f86dc2b7877f07a884ab729d6bcf59a0dac973c739f28
34118	0xfcc9e3391ca560d9043ebed6ba6c1c9efc1748ea51cf379df706a1cbab0e73fc	0x0acdd0fefb605957dfcba4816d77c43dec3f1f79	0xc17f7735d9b8b1655f0285c7e67e200b07b87f2e	3000000000000000	0x	16112857	0xd9845d6da8a7e1403d7f86dc2b7877f07a884ab729d6bcf59a0dac973c739f28
34119	0x9ed155b02bbdc497a03ce09ab6ca0e4f1fd8f5c62b0d3d0568cc3637630c7bc9	0xf6affff7e3c89786a326aa69cca0f37dcbe187ae	0xf89d7b9c864f589bbf53a82105107622b35eaa40	7.97e+16	0x	16112857	0xd9845d6da8a7e1403d7f86dc2b7877f07a884ab729d6bcf59a0dac973c739f28
34120	0x97d69b06342974871cc155cbf6ef0320dded89f7d8eb59727b0493cf87401a0b	0x0c544b97590c0a1baa621f5c59445139d9503832	0xf9ffb0c9d3a6f32a54e965882b7e85c77e3bfe74	0	0xa22cb4650000000000000000000000001e0049783f008a0085193e00003d00cd54003c710000000000000000000000000000000000000000000000000000000000000001	16112857	0xd9845d6da8a7e1403d7f86dc2b7877f07a884ab729d6bcf59a0dac973c739f28
34121	0x4f5f14f6663abad8cf12b9e2c71054219bb808c7aa4b479e1e5899b038574463	0x4976a4a02f38326660d17bf34b431dc6e2eb2327	0x9ab788fc71d22ca50c5f3013ede79d31ddc78d9f	5.07e+17	0x	16112857	0xd9845d6da8a7e1403d7f86dc2b7877f07a884ab729d6bcf59a0dac973c739f28
34123	0x60bad307caa42bcc4b4e702a9ea8b3705e508f2b3a9222b0ad5553be45e4811e	0x1be210e7990eff6c07cb8cadcb9d077063ac3614	0x69b21914e8eb11d0513216fd761787083cfdc1b6	2100000000000000	0x	16112857	0xd9845d6da8a7e1403d7f86dc2b7877f07a884ab729d6bcf59a0dac973c739f28
34124	0xa80e58be18cad5c7840a5e09ea8b0d795211e56d2304cd50fd811049e46c1cc8	0x7c195d981abfdc3ddecd2ca0fed0958430488e34	0x86399c8a5b2f92794fa352edb043bf539fbbd165	2.06e+18	0x	16112857	0xd9845d6da8a7e1403d7f86dc2b7877f07a884ab729d6bcf59a0dac973c739f28
34127	0x4e65f58ac1cd1e2671ce610df9cfdffa5982aebffc77755b794a54bf8fda754c	0xbc6e70cb9b89851e6cff7ce198a774549f4c0f0c	0x8a97a1c3d09d9965f1a0aad6754d6deec10ec008	1.5e+18	0x	16112857	0xd9845d6da8a7e1403d7f86dc2b7877f07a884ab729d6bcf59a0dac973c739f28
34128	0xf1c0fe1e36582b1b5afaed178053610ab31d2228ce1cef78129e249c4320c06b	0xc61db8593bc0e7ca3cba6df6581abe77548d75c8	0xb5e9f6c58f548cee53257304e287b23757effca1	0	0x18cbafe5000000000000000000000000000000000000000000000080380c34d074bd4ee200000000000000000000000000000000000000000000000003232c6a0a148dd300000000000000000000000000000000000000000000000000000000000000a0000000000000000000000000c61db8593bc0e7ca3cba6df6581abe77548d75c800000000000000000000000000000000000000000000000000000000638cdc0b000000000000000000000000000000000000000000000000000000000000000200000…	16112857	0xd9845d6da8a7e1403d7f86dc2b7877f07a884ab729d6bcf59a0dac973c739f28
34129	0x123754da6b97f89cbe81dcd0822f0e6c0d07bda22f19bdfc69922467cb9c82ef	0xa9831d89c4067bf7518efbcb6351ef6dd0059f33	0xdac17f958d2ee523a2206206994597c13d831ec7	0	0x23b872dd000000000000000000000000d72bae8ba89cac2f0a9eb815efc09dd115ae8ec70000000000000000000000008281623eca162837f12223acc73b5d9a1d7e7a6f0000000000000000000000000000000000000000000000000000000000000000	16112857	0xd9845d6da8a7e1403d7f86dc2b7877f07a884ab729d6bcf59a0dac973c739f28
34130	0x428cb2b1a1e72ec20e0377176dcdf8ce1fb0797cd72ae6b3a8b141f3e39997c8	0x9249608b274231f1d66c17bc3ecc531dfc39b2a3	0x45ebb5fe718f40052fb2dc2463c13717b7b72768	0	0x23b872dd0000000000000000000000009249608b274231f1d66c17bc3ecc531dfc39b2a3000000000000000000000000198d63301fc216b15fe625a5d5080169d656b6480000000000000000000000000000000000000000000000000000000000000c89	16112857	0xd9845d6da8a7e1403d7f86dc2b7877f07a884ab729d6bcf59a0dac973c739f28
34131	0xac42e4f134b4fb87abb8762028eb8c23a22d0ace947aa8963a65f8eea561ae55	0xd13a7e49bf1240d9ee28045c6a6d11a31164775e	0xdac17f958d2ee523a2206206994597c13d831ec7	0	0xa9059cbb000000000000000000000000efa515d7ed072999a88bef073940bca5f3979073000000000000000000000000000000000000000000000000000000012a05f200	16112857	0xd9845d6da8a7e1403d7f86dc2b7877f07a884ab729d6bcf59a0dac973c739f28
34132	0xd090a0d6d56f7a8c92ca8f0cc546b7926dfc5a95342142c962150369b20dbb7f	0x73361988ec599df4818412b3acc680bec0e5f853	0xe107cbb96681d258eab97f68ae53ce9d42a31310	0	0xfb8a0c8e0000000000000000000000000000000000000000000000000000000000000020000000000000000000000000000000000000000000000000000000000000000100000000000000000000000000000000000000000000000000000000000005c9	16112857	0xd9845d6da8a7e1403d7f86dc2b7877f07a884ab729d6bcf59a0dac973c739f28
34135	0x8281b23f48175b8ac85319765edd4c7200918a0c00b0fc77571e234ee0bf5bd2	0x30912090401ba6f78a794de1e9777767db5f58c7	0xc02aaa39b223fe8d0a0e5c4f27ead9083c756cc2	0	0x095ea7b30000000000000000000000001e0049783f008a0085193e00003d00cd54003c71ffffffffffffffffffffffffffffffffffffffffffffffffffffffffffffffff	16112857	0xd9845d6da8a7e1403d7f86dc2b7877f07a884ab729d6bcf59a0dac973c739f28
34136	0x695db9671e8541d72c723c5e6626e88a48c9f845669d84fe84e67c74b5af91d2	0x57c8e789548c66adee60a1c956cba7ff0e63d0d0	0xcc6f17e3c8b0ac821812ec714471d310f4f0f917	0	0x	16112857	0xd9845d6da8a7e1403d7f86dc2b7877f07a884ab729d6bcf59a0dac973c739f28
34137	0xfe3624eb407f4b3b526f138ddc031f23bb461e845681e0c2af7773248abdf945	0x92616a84790e0685f8d160f4301fd507067132c9	0x68b3465833fb72a70ecdf485e0e4c7bd8665fc45	0	0x5ae401dc00000000000000000000000000000000000000000000000000000000638cdc0b000000000000000000000000000000000000000000000000000000000000004000000000000000000000000000000000000000000000000000000000000000020000000000000000000000000000000000000000000000000000000000000040000000000000000000000000000000000000000000000000000000000000016000000000000000000000000000000000000000000000000000000000000000e4472b4…	16112857	0xd9845d6da8a7e1403d7f86dc2b7877f07a884ab729d6bcf59a0dac973c739f28
34138	0x29794438f0fcee5467e8020889bd6a17cf6ee04ea61f40ebbd1bf728ac9b1f97	0x9249608b274231f1d66c17bc3ecc531dfc39b2a3	0x198d63301fc216b15fe625a5d5080169d656b648	2750000000000000	0x	16112857	0xd9845d6da8a7e1403d7f86dc2b7877f07a884ab729d6bcf59a0dac973c739f28
34139	0xc6dbecd66dd26b65a539dcf443dbf325b2da9ed9c3f6b42a10c1ded94b997a33	0xb739d0895772dbb71a89a3754a160269068f0d45	0x6d5c056401b58300af1f87a68fb884f4484f5310	7480000000000000	0x	16112857	0xd9845d6da8a7e1403d7f86dc2b7877f07a884ab729d6bcf59a0dac973c739f28
34140	0xe335b0598aedd44b82de3129a618314ac14fef29660902a77f2b3775e567ef96	0xcdd37ada79f589c15bd4f8fd2083dc88e34a2af2	0xae14bb1c7ce862b40ad97af11f1446a568f2dcd0	0	0x79c76e1a000000000000000000000000dac17f958d2ee523a2206206994597c13d831ec7	16112857	0xd9845d6da8a7e1403d7f86dc2b7877f07a884ab729d6bcf59a0dac973c739f28
34141	0xcca269c61e7e2f6ab567cd9167a2f28d8a86130fcaa25775a848df4851ed3b71	0x799e8a81336adaa2e2176fd9018ec51320073393	0x8afde8be6d047a0eca574abf89de10e288a229a2	0	0x095ea7b3000000000000000000000000e3e3231889e84f23dbd26ec0c220b0af23a95ebfffffffffffffffffffffffffffffffffffffffffffffffffffffffffffffffff	16112857	0xd9845d6da8a7e1403d7f86dc2b7877f07a884ab729d6bcf59a0dac973c739f28
34143	0x7ba12520a1c2041a2d15f23e1ae4f2e97a1aee9be5cd9612d0ebd9a8869a9f59	0xe8527f01bdf894aaab08ee10d813e009a85edfab	0xdac17f958d2ee523a2206206994597c13d831ec7	0	0xa9059cbb0000000000000000000000005d4d6cf48c02e64cdf81d9f0756a60b4c4b33a35000000000000000000000000000000000000000000000000000000002984aad8	16112857	0xd9845d6da8a7e1403d7f86dc2b7877f07a884ab729d6bcf59a0dac973c739f28
34147	0x3c4db28135ef4be0d81165ecd1aae5b4e431d21a0214105fa9c792d3761ab26e	0xda4a69a4ef0d2c8f08b533161d74a352cde1b08f	0x283af0b28c62c092c9727f1ee09c02ca627eb7f5	4370000000000000	0xf7a1696300000000000000000000000000000000000000000000000000000000000000c0000000000000000000000000da4a69a4ef0d2c8f08b533161d74a352cde1b08f0000000000000000000000000000000000000000000000000000000001e185589f67965c88b690d530fe54fa0d20630128a3b1783b3e2d728243925fc877af040000000000000000000000004976fb03c32e5b8cfe2b6ccb31c09ba78ebaba41000000000000000000000000da4a69a4ef0d2c8f08b533161d74a352cde1b08f00000…	16112857	0xd9845d6da8a7e1403d7f86dc2b7877f07a884ab729d6bcf59a0dac973c739f28
34148	0x09eb12342463d455ee504cb108f4e18f4c7cf6161ca5b57bcccf260211d17fa2	0x9696f59e4d72e237be84ffd425dcad154bf96976	0xdac17f958d2ee523a2206206994597c13d831ec7	0	0xa9059cbb0000000000000000000000007f21de994d5e4c6de3dd4e91bd498dbcb9c2776b0000000000000000000000000000000000000000000000000000000145402900	16112857	0xd9845d6da8a7e1403d7f86dc2b7877f07a884ab729d6bcf59a0dac973c739f28
34149	0xc298b003d41c677625be76f06d2882fa942f315cfb985c0f28792ba8d2a66138	0xf34ac04a28f7cb5324a167c96b24ade9c742b44f	0x02f878a94a1ae1b15705acd65b5519a46fe3517e	0	0xc980753900000000000000000000000000000000000000000000000000000000000000800000000000000000000000000000000000000000000000000000000000000320000000000000000000000000000000000000000000000000000000000000040001000000000100000000000000000000000000000000000000000000000000000000000000000000000000000000000000000000000000000000000000000280000000000000000000000081ff13ccb179d0bfca912427caacc4370003de730109040…	16112857	0xd9845d6da8a7e1403d7f86dc2b7877f07a884ab729d6bcf59a0dac973c739f28
34150	0x15c9d70b24c8e7c0629833a5634a25cc5240ef5ab3973782cf93192857851538	0xd24400ae8bfebb18ca49be86258a3c749cf46853	0x5f65f7b609678448494de4c87521cdf6cef1e932	0	0xfa558b71000000000000000000000000056fd409e1d7a124bd7017459dfea2f387b6d5cd000000000000000000000000000000000000000000000000000000000000006000000000000000000000000000000000000000000000000000000000000000a00000000000000000000000000000000000000000000000000000000000000001000000000000000000000000d5d8407b128abac562f6548b8604582ed211f3c8000000000000000000000000000000000000000000000000000000000000000100000…	16112857	0xd9845d6da8a7e1403d7f86dc2b7877f07a884ab729d6bcf59a0dac973c739f28
34152	0x30967b8b0e325c89d91ead239f2d0bafcddcb569af2d061600fb870bf9543a7b	0xab97925eb84fe0260779f58b7cb08d77dcb1ee2b	0x117129be468ad0a2ea6d735effc008386af3857e	8e+16	0x	16112857	0xd9845d6da8a7e1403d7f86dc2b7877f07a884ab729d6bcf59a0dac973c739f28
34154	0xfbc16bbd7febe4156e301d27c7383493667cf68e083aa6af593bd44ee1fb62d5	0x28c6c06298d514db089934071355e5743bf21d60	0xf2822b7a12db3cfd4dc073c093880a7b3043ac8f	3.03e+16	0x	16112857	0xd9845d6da8a7e1403d7f86dc2b7877f07a884ab729d6bcf59a0dac973c739f28
34155	0x196158faf2ebce5bae596208c81cfffb0aa440181b8b1c0e56b1ad65fcf3d7f7	0x75e89d5979e4f6fba9f97c104c2f0afb3f1dcb88	0x86425a2f46253bf70aa1f996deabab8ce343e720	4.28e+16	0x	16112857	0xd9845d6da8a7e1403d7f86dc2b7877f07a884ab729d6bcf59a0dac973c739f28
34156	0x791edab933e16a92a8551ff43f5db2ba514b2fc1b14bcb84af9a206f8e216d76	0xb3de6d8e547d7627d226fd86c8173fd37e04fdda	0x8686525d6627a25c68de82c228448f43c97999f2	0	0x095ea7b300000000000000000000000025553828f22bdd19a20e4f12f052903cb474a335ffffffffffffffffffffffffffffffffffffffffffffffffffffffffffffffff	16112857	0xd9845d6da8a7e1403d7f86dc2b7877f07a884ab729d6bcf59a0dac973c739f28
34157	0x7153bb1df90bb43b8e96cdcad579f4be17ad9f39dda4a16d90efd0e9073e7ce9	0x1143a472310b8e3f90b01df38d02e424e0f8422e	0xad4f46ebed8b1fa2db1702781467d36893ea27c4	5300000000000000	0x	16112857	0xd9845d6da8a7e1403d7f86dc2b7877f07a884ab729d6bcf59a0dac973c739f28
34159	0x07ef6f22c7530a269041eebf74e467dea12034b85057c8dff7f0cc2abaa73aa4	0xd40bf7d7d25abb5d9a39a6ed008d00947327fa5b	0x941d936f42a8ceeeb7968be8d9b6ae29bac5fbb8	4e+16	0x40c10f19000000000000000000000000d40bf7d7d25abb5d9a39a6ed008d00947327fa5b0000000000000000000000000000000000000000000000000000000000000001	16112857	0xd9845d6da8a7e1403d7f86dc2b7877f07a884ab729d6bcf59a0dac973c739f28
34161	0x1815884379207006116291fd0f101c8b4f4300ede266e025a99726dcd1235249	0x9e17a0458c541e8099a631695f078fd3f1584eea	0xf89d7b9c864f589bbf53a82105107622b35eaa40	7.97e+16	0x	16112857	0xd9845d6da8a7e1403d7f86dc2b7877f07a884ab729d6bcf59a0dac973c739f28
34164	0x471afdd224518debd6f1739a4ec3e084c68f4aec1c020706f5a6b02a68f2a3c5	0x8c94072567b278b9fa12192cca899b3ce0ed5fdc	0xc3f8a0f5841abff777d3eefa5047e8d413a1c9ab	0	0x42842e0e0000000000000000000000008c94072567b278b9fa12192cca899b3ce0ed5fdc0000000000000000000000006f182bd3ae8c291654c94fcbd8d80e8f2ea442b80000000000000000000000000000000000000000000000000000000000002645360c6ebe	16112857	0xd9845d6da8a7e1403d7f86dc2b7877f07a884ab729d6bcf59a0dac973c739f28
34165	0xb1575d845b859795e616c02085d46e606b14189b9e08581f5a86f13db7d17a47	0xd24400ae8bfebb18ca49be86258a3c749cf46853	0xfcbfe4130a0031558b10053f17b7597f428a59e8	7.03e+17	0x	16112857	0xd9845d6da8a7e1403d7f86dc2b7877f07a884ab729d6bcf59a0dac973c739f28
34166	0xf589f4934ed973c5f6b1e21582271391515859713b6e5ec3c78c162ec5073e62	0x9249608b274231f1d66c17bc3ecc531dfc39b2a3	0x32c406c6c09d85d9442802c919850dcdf87c4a38	0	0x23b872dd0000000000000000000000009249608b274231f1d66c17bc3ecc531dfc39b2a3000000000000000000000000198d63301fc216b15fe625a5d5080169d656b64800000000000000000000000000000000000000000000000000000000000000d1	16112857	0xd9845d6da8a7e1403d7f86dc2b7877f07a884ab729d6bcf59a0dac973c739f28
34168	0x92ade8b7bd1ef59a0894cd22aefab4c3212c590c238beeb8fbf11d04aae298b6	0xff82bf5238637b7e5e345888bab9cd99f5ebe331	0xa69babef1ca67a37ffaf7a485dfff3382056e78c	2053	0x1cff79cd000000000000000000000000fc588723ead01d032b837229577f6a532e5a0c20000000000000000000000000000000000000000000000000000000000000004000000000000000000000000000000000000000000000000000000000000000c41f3cc1fe00000000000000000000000000000000000000000000000000000015ee9433710000000000000000000000000000000000000000000000001177eec5a571a7000000000000000000000000000000000000006e20fc683db11711ec9f58baa…	16112857	0xd9845d6da8a7e1403d7f86dc2b7877f07a884ab729d6bcf59a0dac973c739f28
34170	0x5ac603a2d795f995155b9b5ef50647c7f632c9a29101ca291788ea324419f6c9	0x12e69083543b44f3ccf8f31ffa508c89772f3d48	0xbd88d998f25002bcc07f13feeb3d62d7f4141702	2500000000000000	0x	16112857	0xd9845d6da8a7e1403d7f86dc2b7877f07a884ab729d6bcf59a0dac973c739f28
34173	0x847de9717c2d2345024ae5c321d06abde0bfd347e77bf13398688b4a0244bbb2	0x75e89d5979e4f6fba9f97c104c2f0afb3f1dcb88	0x995a6c0944322b7285d0712824acf0cf9bf3993a	0	0xa9059cbb0000000000000000000000000406a7d6f869d63ab6777c0400788b7e6bd1edca0000000000000000000000000000000000000000000236cae29a1ad2c1a80000	16112857	0xd9845d6da8a7e1403d7f86dc2b7877f07a884ab729d6bcf59a0dac973c739f28
34175	0x6be3b112196234e3accb099be57bad4eeaab7e253d63467eea43867ca3fb023a	0xf6cd0200a6b94ab46f2cbd5c934b358bbeb552ea	0x282a7d13152b3f51a3e31d46a2ca563f8554d85d	0	0xa22cb4650000000000000000000000001e0049783f008a0085193e00003d00cd54003c710000000000000000000000000000000000000000000000000000000000000001	16112857	0xd9845d6da8a7e1403d7f86dc2b7877f07a884ab729d6bcf59a0dac973c739f28
34177	0x97dd31677866dac83a5e80f6d8f596e3f8600d0e78862af74ce3249c56cf4914	0x26d5a5d0f1e522f59735467212e53872dff20c09	0x084b1c3c81545d370f3634392de611caabff8148	0	0xc47f00270000000000000000000000000000000000000000000000000000000000000020000000000000000000000000000000000000000000000000000000000000001162657974756c6c6168656c65732e657468000000000000000000000000000000	16112857	0xd9845d6da8a7e1403d7f86dc2b7877f07a884ab729d6bcf59a0dac973c739f28
34178	0x2ef246617cab05b5374474b82849c120c5ed7ea36568ee6eaf14487de4e5f1c2	0xd24400ae8bfebb18ca49be86258a3c749cf46853	0x5f65f7b609678448494de4c87521cdf6cef1e932	0	0xfa558b710000000000000000000000006de037ef9ad2725eb40118bb1702ebb27e4aeb24000000000000000000000000000000000000000000000000000000000000006000000000000000000000000000000000000000000000000000000000000000a0000000000000000000000000000000000000000000000000000000000000000100000000000000000000000097bb1816398b1fce31a7cdb44b27f9e823178e37000000000000000000000000000000000000000000000000000000000000000100000…	16112857	0xd9845d6da8a7e1403d7f86dc2b7877f07a884ab729d6bcf59a0dac973c739f28
34182	0x60bb960af1c5504f4eedeecfc2cb93e70887fa2cb87d9a2adc5e920e3dc33b4d	0x974caa59e49682cda0ad2bbe82983419a2ecc400	0xa6247066e417aec820ef04003ff383c82bde6a79	3.56e+18	0x	16112856	0x6bf7f93e5e8336dfa7528048c1772094e0279a445b5c6f4ecb228f378109ffc9
34183	0x461aa4ffc319eb724cee4686b4e689d2dc525f37ff8cb38dc19eb60d5a8f799a	0x473300df21d047806a082244b417f96b32f13a33	0xbe5dab4a2e9cd0f27300db4ab94bee3a233aeb19	0	0x8ca5cbb900000000000000000000000000000000000000000000000000000000000000400000000000000000000000000000000000000000000000000000000002b4492300000000000000000000000000000000000000000000000000000000000003cbfbcd54ca2d0943d04473916b443caedb647a42236eb011a1c93a16b9c082a07efa8c02bb441e8ff9ba4159a3d101d350aa733976606c6bc4d53058108e65425f637ac52eb442785ea3efef6e25cf6f1514e85f05d1b298987b315f2201deaf9218f57…
34184	0x0a3db6926e2f3a47031ac84ba883542410901183f460c12d6f04f78db280f6a0	0x3778d62bf4309947f518c961377af6fef45ae48a	0xff1f2b4adb9df6fc8eafecdcbf96a2b351680455	5.03e+16	0x7ff48afb000000000000000000000000000000000000000000000000000000000000000000000000000000000000000000000000000000000000000000b2a164c34e80000000000000000000000000003778d62bf4309947f518c961377af6fef45ae48a0000000000000000000000000000000000000000000000000000000000000000	16112856	0x6bf7f93e5e8336dfa7528048c1772094e0279a445b5c6f4ecb228f378109ffc9
34185	0xcf16f100dfadc3f82436421dce6efc01c49a833232f1b831447c11a4ab65f344	0xb987242fdc9d4ec436f9a2f214ec3b67898bbdf8	0xac31c1a0702cd7bc8fa3a150d706d1a3a7c77e1c	2.09e+16	0x	16112856	0x6bf7f93e5e8336dfa7528048c1772094e0279a445b5c6f4ecb228f378109ffc9
34186	0x6f944554d38deeb113de4f0d2067586c403cd4b5060f425fa875e285f05cfed2	0x1be210e7990eff6c07cb8cadcb9d077063ac3614	0x33efd4c7029308ea435bbee0e3a899a90496d181	2100000000000000	0x	16112856	0x6bf7f93e5e8336dfa7528048c1772094e0279a445b5c6f4ecb228f378109ffc9
34187	0x1626114d3d900c87066e160d45c59c3d9e1aa349ba1d57e94ac9a5ff28307e10	0x80c67432656d59144ceff962e8faf8926599bcf8	0x41c56aad9e5eff5be3e8452852bd8b36194985af	1.38e+17	0x	16112856	0x6bf7f93e5e8336dfa7528048c1772094e0279a445b5c6f4ecb228f378109ffc9
34188	0x49aba559146b1d9bfd42c6caab80b1769c41109a217e326a1b7fb0974447eaa1	0xb8209dc29464f655a41e88e55a219ef2166f76c8	0xfb5c6815ca3ac72ce9f5006869ae67f18bf77006	0	0x095ea7b300000000000000000000000068b3465833fb72a70ecdf485e0e4c7bd8665fc45ffffffffffffffffffffffffffffffffffffffffffffffffffffffffffffffff	16112856	0x6bf7f93e5e8336dfa7528048c1772094e0279a445b5c6f4ecb228f378109ffc9
34191	0xf51df117e4d4152a0f61ab38cc4acb3ed51a1d2739e466121dfa7ac4ce5f8dd5	0xed98af55bf714ed4f5131f3625c59bc1506a2ce9	0xc02aaa39b223fe8d0a0e5c4f27ead9083c756cc2	0	0xa9059cbb000000000000000000000000ed98af55bf714ed4f5131f3625c59bc1506a2ce9000000000000000000000000000000000000000000000000001550f7dca70000	16112856	0x6bf7f93e5e8336dfa7528048c1772094e0279a445b5c6f4ecb228f378109ffc9
34192	0x25c5745791247c87658783f6f517c6ce8605a4ab5c9f5231891cc9fd89dc95a0	0x016dbc709b8c1667d7303e2c4129167d660dc010	0x00000000006c3852cbef3e08e8df289169ede581	4e+16	0xfb0f3ee1000000000000000000000000000000000000000000000000000000000000002000000000000000000000000000000000000000000000000000000000000000000000000000000000000000000000000000000000000000000000000000000000000000000000000000000000000000000000000000000000007c585087238000000000000000000000000000bbf02b1d31b8b99cc02b2a22f51813f62aff9148000000000000000000000000004c00500000ad104d7dbd00e3ae0a5c00560c0000000…	16112856	0x6bf7f93e5e8336dfa7528048c1772094e0279a445b5c6f4ecb228f378109ffc9
34194	0xf0b7b3551f3321b111519e0f89dd80d894f55ba8d4face458a0c2f8a5e393a13	0xcaa6d941b940371d6f95e17a4a6d6291dc5c7520	0x68b3465833fb72a70ecdf485e0e4c7bd8665fc45	5e+16	0x5ae401dc00000000000000000000000000000000000000000000000000000000638cdc0b00000000000000000000000000000000000000000000000000000000000000400000000000000000000000000000000000000000000000000000000000000001000000000000000000000000000000000000000000000000000000000000002000000000000000000000000000000000000000000000000000000000000000e4472b43f300000000000000000000000000000000000000000000000000b1a2bc2ec50…	16112856	0x6bf7f93e5e8336dfa7528048c1772094e0279a445b5c6f4ecb228f378109ffc9
34197	0xad57c8dcf8f8e8717511bac066632675c57942229c6a15c7f13be7cbafd872dc	0x74bcdd2f3a6a91bd34fe6749b8b522f9ecde2e3a	0x76f4eed9fe41262669d0250b2a97db79712ad855	0	0xf17a454600000000000000000000000000000000000000000000000000000000000000c000000000000000000000000000000000000000000000000000000000000001a000000000000000000000000000000000000000000000000000000002540be40000000000000000000000000000000000000000000000000000000002524220800000000000000000000000001d64fb0ffa8362b2e1ee7ee03929159551eab26e000000000000000000000000000000000000000000000000000000000000022000000…	16112856	0x6bf7f93e5e8336dfa7528048c1772094e0279a445b5c6f4ecb228f378109ffc9
34198	0x0e72004a1c7c7566ed2cb5009831502bf86b140eb0559605d51f1c4616fba139	0x0971fcb069ecde4eb4a43325e46041aab73f5732	0x084b1c3c81545d370f3634392de611caabff8148	0	0xc47f00270000000000000000000000000000000000000000000000000000000000000020000000000000000000000000000000000000000000000000000000000000000b6672616476726b2e657468000000000000000000000000000000000000000000	16112856	0x6bf7f93e5e8336dfa7528048c1772094e0279a445b5c6f4ecb228f378109ffc9
34200	0x61b3f72e503682e5d22705861cb8ca32a4e6e5d3d3f43e5324a772ec624bf298	0xc77a1222f675b4142ded8998e7cb938fea1db44d	0x76f4eed9fe41262669d0250b2a97db79712ad855	2e+19	0xf17a454600000000000000000000000000000000000000000000000000000000000000c000000000000000000000000000000000000000000000000000000000000001a0000000000000000000000000000000000000000000000001158e460913cff06000000000000000000000000000000000000000000000000115872b0bca42f0600000000000000000000000001d64fb0ffa8362b2e1ee7ee03929159551eab26e000000000000000000000000000000000000000000000000000000000000022000000…	16112856	0x6bf7f93e5e8336dfa7528048c1772094e0279a445b5c6f4ecb228f378109ffc9
34203	0xe97a0f2243c46e41d6bd2cf0fc6e9650218fb554e2f44ef3f57f867c7cf871e8	0x75e89d5979e4f6fba9f97c104c2f0afb3f1dcb88	0x1392bd8e31f24f4731ba2999dabcbf61efa756d5	7000000000000000	0x	16112856	0x6bf7f93e5e8336dfa7528048c1772094e0279a445b5c6f4ecb228f378109ffc9
34204	0x65ce0c41fdeac66e8b9d6a862f99f3ea9b46187b3308e29ed72941618e86fd63	0x1be210e7990eff6c07cb8cadcb9d077063ac3614	0x28240d8f006ab63bd32f4946ad4ad1733e61d521	2100000000000000	0x	16112856	0x6bf7f93e5e8336dfa7528048c1772094e0279a445b5c6f4ecb228f378109ffc9
34205	0x7cca3e609ff00d995532366ae783548d7f17cd2d0cab1835af7797da9612dad4	0xa9268d3b2c800ed17384af692cc42b7b4b41a475	0x44cd4a5b07bab312c46003a9c508bbea1e21d887	9910000000000000	0x	16112856	0x6bf7f93e5e8336dfa7528048c1772094e0279a445b5c6f4ecb228f378109ffc9
34207	0xe9d68ecad49aa34eb3982eacd080bf7969b278efff854c4d2515e5928d8f1a0e	0xd8bad06cde4cd145ed485605359cfc2b8a8d329c	0x78b5c6149c87c82edcffc73c230395abbc56ddd5	0	0x4000aea00000000000000000000000008b79b97bf6b88ec7d145e44d0fc2cdb37e7a5a7200000000000000000000000000000000000000000000021e19e0c9bab2400000000000000000000000000000000000000000000000000000000000000000006000000000000000000000000000000000000000000000000000000000000000200000000000000000000000000000000000000000000000000000000000000002	16112856	0x6bf7f93e5e8336dfa7528048c1772094e0279a445b5c6f4ecb228f378109ffc9
34208	0x60599eeb758e2e37a4f9f3b9e7a8adc3693500d6aec857f9f2736bc228ef70ab	0x690b9a9e9aa1c9db991c7721a92d351db4fac990	0x388c818ca8b9251b393131c08a736a67ccb19297	3.81e+16	0x	16112856	0x6bf7f93e5e8336dfa7528048c1772094e0279a445b5c6f4ecb228f378109ffc9
34209	0x738c83036c5cc4f8cb560a9788289a7f20bdaa523d067ba0d4e375717a803da8	0x1689a089aa12d6cbbd88bc2755e4c192f8702000	0x59e178f12e71e2e8fa3eebb44e31820bc1d27a62	2550000000000000	0x	16112856	0x6bf7f93e5e8336dfa7528048c1772094e0279a445b5c6f4ecb228f378109ffc9
34210	0x442da75535604c3d7dcd7b04b09e32862223d46c0412c0078a0dd99b1992883e	0x1be210e7990eff6c07cb8cadcb9d077063ac3614	0x4b4f2bd119aa3622f320d821e83cd3b02159551e	2100000000000000	0x	16112856	0x6bf7f93e5e8336dfa7528048c1772094e0279a445b5c6f4ecb228f378109ffc9
34211	0x6ae50821ad35762fcd55fac5e56524bc5f452db4c27ca75e97c4b22690e0dd7a	0x95f7dc159d8d86177d967c1e8f46876cca4f5a5c	0x95f7dc159d8d86177d967c1e8f46876cca4f5a5c	9.94e+17	0x	16112856	0x6bf7f93e5e8336dfa7528048c1772094e0279a445b5c6f4ecb228f378109ffc9
34212	0x52f47a83eeeba449ef17e196faf48787ed226d518b38e81270eae66f8983da42	0x1be210e7990eff6c07cb8cadcb9d077063ac3614	0x444215a4ef78a499c949ba2d2e516e1316366939	2100000000000000	0x	16112856	0x6bf7f93e5e8336dfa7528048c1772094e0279a445b5c6f4ecb228f378109ffc9
34213	0x240289b87c0d3ef64cf27a707b718934c8ae1f8cc225bd24c72caf5164949f9b	0x21a31ee1afc51d94c2efccaa2092ad1028285549	0x01c74e33cff134741d159ac6afdbddd88f100615	1.03e+16	0x	16112856	0x6bf7f93e5e8336dfa7528048c1772094e0279a445b5c6f4ecb228f378109ffc9
34215	0x43b5b77d87ecfe4a6b75fba91d2436a1dd4e97e606dd6a32f82c1f08c9842bdf	0xa8e6ec181bc616c6c22c42bc5f5d52ca63955ea6	0xdac17f958d2ee523a2206206994597c13d831ec7	0	0xa9059cbb000000000000000000000000e570e27e03c51b8521e5719db98a3e351954224b00000000000000000000000000000000000000000000000000000000028439e0	16112856	0x6bf7f93e5e8336dfa7528048c1772094e0279a445b5c6f4ecb228f378109ffc9
34217	0xd5e1cef3fb8a18cb9dabb743ac579b58982a2d600e64f6f06345c4da5cdff0ca	0x6b83a53eeea7af55d6ddfd30bf0be5e8f88d1207	0xf98972d4fa3d078ae4873ea2a7a925d2078a338d	2.3e+17	0x	16112856	0x6bf7f93e5e8336dfa7528048c1772094e0279a445b5c6f4ecb228f378109ffc9
34218	0x824270d5c3dcc8ac3f05479755349f1b92be2d8d0f32314c474a45d749139868	0x716eb921f3b346d2c5749b5380dc740d359055d7	0x881d40237659c251811cec9c364ef91dc08d300c	0	0x5f57552900000000000000000000000000000000000000000000000000000000000000800000000000000000000000007d1afa7b718fb893db30a3abc0cfc608aacfebb000000000000000000000000000000000000000000000005ca1ae74ed0a9ee00000000000000000000000000000000000000000000000000000000000000000c0000000000000000000000000000000000000000000000000000000000000000c307846656544796e616d6963000000000000000000000000000000000000000000000…	16112856	0x6bf7f93e5e8336dfa7528048c1772094e0279a445b5c6f4ecb228f378109ffc9
34219	0xadfda25f8ae8c584c6f7ca67a3721220bb605c0c9971ba12be80446bb909de9e	0x9f97bbf3f143cf5c0b1819d1b57398c2ab6e87d6	0xfa103c21ea2df71dfb92b0652f8b1d795e51cdef	0	0x1cff79cd000000000000000000000000813ffae25b9b8c909ecc9e2f9747006e0b43d16d0000000000000000000000000000000000000000000000000000000000000040000000000000000000000000000000000000000000000000000000000000008452de3cbd00000000000000000000000092d6c1e31e14520e676a687f0a93788b716beff500000000000000000000000056178a0d5f301baf6cf3e1cd53d9863437345bf90000000000000000000000003229149012a035ef51d724e0343eb31ce3e4b…	16112856	0x6bf7f93e5e8336dfa7528048c1772094e0279a445b5c6f4ecb228f378109ffc9
34220	0x3d9989e52e74bd943c92e5c41f5f7ae8a288e1aee3d3e1033b318607d18aa71d	0x7a933231fbc3ebcf1a2eab47447e87568870e9c1	0x68b3465833fb72a70ecdf485e0e4c7bd8665fc45	1.71e+17	0x5ae401dc00000000000000000000000000000000000000000000000000000000638cdbff00000000000000000000000000000000000000000000000000000000000000400000000000000000000000000000000000000000000000000000000000000001000000000000000000000000000000000000000000000000000000000000002000000000000000000000000000000000000000000000000000000000000000e4472b43f3000000000000000000000000000000000000000000000000025e0609cdc38…	16112856	0x6bf7f93e5e8336dfa7528048c1772094e0279a445b5c6f4ecb228f378109ffc9
34222	0x7ef07b0c97987127f5dfa596705524bdd0d64adb6159691e4c590c065d56a707	0x45a2235b9027eab23ffcf759c893763f0019cbff	0x1ffcd1f2511d4a277a7efc08a4f3e808544f6ab0	0	0xa22cb4650000000000000000000000001e0049783f008a0085193e00003d00cd54003c710000000000000000000000000000000000000000000000000000000000000001	16112856	0x6bf7f93e5e8336dfa7528048c1772094e0279a445b5c6f4ecb228f378109ffc9
34223	0xe0670317396b49c10d01a2901f6b1b54265d421330b9c22b147270caf16ea83f	0x56eddb7aa87536c09ccc2793473599fd21a8b17f	0xebf05f3dd2f658f0457e7913c87529f6c30e70f3	7.48e+16	0x	16112856	0x6bf7f93e5e8336dfa7528048c1772094e0279a445b5c6f4ecb228f378109ffc9
34224	0x2f0f34ebfc2517b608aa26cb71da62c8d715292a664da4924b9aef5935576c4f	0xf8094947bf92f5f4a665eb370f63e670dccbbfa1	0xe2cb83dce014190e9ff039c7e73241d81edc64d0	0	0x983d95ce000000000000000000000000000000000000000000000000000000000000002000000000000000000000000000000000000000000000000000000000000000020000000000000000000000000000000000000000000000000000000000000227000000000000000000000000000000000000000000000000000000000000108f	16112856	0x6bf7f93e5e8336dfa7528048c1772094e0279a445b5c6f4ecb228f378109ffc9
34226	0xad2f685881ddb4201fc427a101dc586bb77123f53cdf12d0705f05880a276a91	0xd54e4f8a55247487dd7c8c59f14ee5c0c2889477	0x1111111254fb6c44bac0bed2854e76f90643097d	0	0x2e95b6c8000000000000000000000000c02aaa39b223fe8d0a0e5c4f27ead9083c756cc20000000000000000000000000000000000000000000000000de0b6b3a764000000000000000000000000000000000000000000000000054fb15f4705128319710000000000000000000000000000000000000000000000000000000000000080000000000000000000000000000000000000000000000000000000000000000180000000000000003b6d0340e5c5227d8105d8d5f26ff3634eb52e2d7cc15b50e26b9…	16112856	0x6bf7f93e5e8336dfa7528048c1772094e0279a445b5c6f4ecb228f378109ffc9
34228	0x4e7a7555223aafddecd48a5b887d49681b1ea120982a6223a6564387ecca0830	0xa64c3889eb7bb32f2b37fccd055752539b9856e6	0x68b3465833fb72a70ecdf485e0e4c7bd8665fc45	0	0x5ae401dc00000000000000000000000000000000000000000000000000000000638cdbf3000000000000000000000000000000000000000000000000000000000000004000000000000000000000000000000000000000000000000000000000000000020000000000000000000000000000000000000000000000000000000000000040000000000000000000000000000000000000000000000000000000000000016000000000000000000000000000000000000000000000000000000000000000e4472b4…	16112856	0x6bf7f93e5e8336dfa7528048c1772094e0279a445b5c6f4ecb228f378109ffc9
34229	0x609a36bd78075212199e7238dfc23a1f285b211ce76a8f3805fcdbe17d63dd61	0xb66634d2c8fd5bc7571cacd0ce44db27210605d1	0x495f947276749ce646f68ac8c248420045cb7b5e	0	0xf242432a000000000000000000000000b66634d2c8fd5bc7571cacd0ce44db27210605d1000000000000000000000000724264acaa5be1465313d89ef3003405dca8860c513c0b27708461939c2a9867211add21eb0db1e60000000000034f0000000001000000000000000000000000000000000000000000000000000000000000000100000000000000000000000000000000000000000000000000000000000000a0000000000000000000000000000000000000000000000000000000000000000000000…	16112856	0x6bf7f93e5e8336dfa7528048c1772094e0279a445b5c6f4ecb228f378109ffc9
34230	0xcf62dcaa6ec4e933065cc5622bf853d67d649413f5b435c5cb37e345ac4fa019	0x586608c469edc6f98cb3284de154a9b71a5fc596	0x1048a3ecb9c0b102e0539c834abbe17f0f3c1524	4.17e+16	0x	16112856	0x6bf7f93e5e8336dfa7528048c1772094e0279a445b5c6f4ecb228f378109ffc9
34232	0x1742ba56c6db1948203d6645f8181865e899e9c70e53437da27268763f33bd35	0xbfa07848769954f5680d0c0f7c928ee0f26c2175	0x7a250d5630b4cf539739df2c5dacb4c659f2488d	0	0x791ac94700000000000000000000000000000000000000000000ab328e8202c110bc61ff0000000000000000000000000000000000000000000000000017ab4a44d6f1bb00000000000000000000000000000000000000000000000000000000000000a0000000000000000000000000bfa07848769954f5680d0c0f7c928ee0f26c217500000000000000000000000000000000000000000000000000000000638cd58d000000000000000000000000000000000000000000000000000000000000000200000…	16112856	0x6bf7f93e5e8336dfa7528048c1772094e0279a445b5c6f4ecb228f378109ffc9
34233	0xe6a0905b9d8526509812bcbbf2d5dd2858064cedaa8b1491094bebc63a3de802	0x1be210e7990eff6c07cb8cadcb9d077063ac3614	0x434daf5a87350bd8525abbf48f0844fba51b2697	2100000000000000	0x	16112856	0x6bf7f93e5e8336dfa7528048c1772094e0279a445b5c6f4ecb228f378109ffc9
34234	0xa36f1043783b321401a8b6fc52ac539d3afd016e4959a64355b844de280d0e84	0xa2efd75b5b24f1959d970adfa0934a974d1c1956	0x68b3465833fb72a70ecdf485e0e4c7bd8665fc45	0	0x5ae401dc00000000000000000000000000000000000000000000000000000000638cdc0b00000000000000000000000000000000000000000000000000000000000000400000000000000000000000000000000000000000000000000000000000000001000000000000000000000000000000000000000000000000000000000000002000000000000000000000000000000000000000000000000000000000000000e4472b43f300000000000000000000000000000000000000000000003d8bdc7d5fcca37…	16112856	0x6bf7f93e5e8336dfa7528048c1772094e0279a445b5c6f4ecb228f378109ffc9
34236	0x0b02ffe2d3059e71d2ce001ae5878aba8b8a29065c0eacf2ed14e5afc833f14e	0xe482ca6a1f104ce3750c99050a2e8d30bad41dc1	0x495f947276749ce646f68ac8c248420045cb7b5e	0	0xf242432a000000000000000000000000e482ca6a1f104ce3750c99050a2e8d30bad41dc1000000000000000000000000a858ddc0445d8131dac4d1de01f834ffcba52ef1e482ca6a1f104ce3750c99050a2e8d30bad41dc10000000000002600000032c8000000000000000000000000000000000000000000000000000000000000000100000000000000000000000000000000000000000000000000000000000000a0000000000000000000000000000000000000000000000000000000000000000000000…	16112856	0x6bf7f93e5e8336dfa7528048c1772094e0279a445b5c6f4ecb228f378109ffc9
34239	0x341c5d738e5aab52f77dd6c928bff141ff7e074436b2fc8b875398a5338a55a7	0x1be210e7990eff6c07cb8cadcb9d077063ac3614	0x3ca4324c5861a1b952898cd03e2f1ccbfc66924d	2100000000000000	0x	16112856	0x6bf7f93e5e8336dfa7528048c1772094e0279a445b5c6f4ecb228f378109ffc9
34243	0x48baf352f80ef27b34d04ce5dcbe7d722c366c53bd5616d583918fbe14f3aa7a	0xd637243d78c95af3d30e9bd5199ec51c801c563a	0x2cc8342d7c8bff5a213eb2cde39de9a59b3461a7	0	0xa22cb46500000000000000000000000000000000000111abe46ff893f3b2fdf1f759a8a80000000000000000000000000000000000000000000000000000000000000001	16112856	0x6bf7f93e5e8336dfa7528048c1772094e0279a445b5c6f4ecb228f378109ffc9
34244	0x2cc97e254a3cfcb758d71fec49f05d624303861bce5b901102174cda0ee88a2d	0x68f272fcaae074cb33e68d88a32c325ed0df8379	0xa0b86991c6218b36c1d19d4a2e9eb0ce3606eb48	0	0xa9059cbb000000000000000000000000fad8a64bfc3a0ff541d55a43311ce4772658f49f000000000000000000000000000000000000000000000000000000003a658f04	16112856	0x6bf7f93e5e8336dfa7528048c1772094e0279a445b5c6f4ecb228f378109ffc9
34246	0x746ee1b35f77a38c3d74d6bea059f6d406f508fe32bf6627d05b0ddca412e336	0x4976a4a02f38326660d17bf34b431dc6e2eb2327	0x23d832ba4b2b0d07284a83a2b0b8354e84052895	9230000000000000	0x	16112856	0x6bf7f93e5e8336dfa7528048c1772094e0279a445b5c6f4ecb228f378109ffc9
34247	0xf3576d7477da8e4958d347ea703ea9db024141e5d9008adb040ad46288f89299	0xb45f7889722b34b2af5001cdb35648535a038a14	0x4976fb03c32e5b8cfe2b6ccb31c09ba78ebaba41	0	0x8b95dd717c0a05d708737d86103e64708f162b13a2ae272a93579dbb16a1e8c7222ac824000000000000000000000000000000000000000000000000000000000000003c000000000000000000000000000000000000000000000000000000000000006000000000000000000000000000000000000000000000000000000000000000140987bbc966b754d4c6179b44516deff8b357f7fd000000000000000000000000	16112856	0x6bf7f93e5e8336dfa7528048c1772094e0279a445b5c6f4ecb228f378109ffc9
34248	0x22ba796efa77e0e6017681ddd1a637cca0657455b639f9da69325b815a1c5adc	0x83bfa75c9391dbe19e0a1d2c53c9b6c4baef5ab7	0x67e468af423cbcbb39b6f1dfb67e674d4ea8178b	2e+16	0x	16112856	0x6bf7f93e5e8336dfa7528048c1772094e0279a445b5c6f4ecb228f378109ffc9
34249	0x51ccbe3f3ef1da362249a1807056e6aa300eba28e141cc574d2d43fd477f52a8	0x5bcbdfb6cc624b959c39a2d16110d1f2d9204f72	0xdac17f958d2ee523a2206206994597c13d831ec7	0	0xa9059cbb00000000000000000000000057590f0ab9be0f57383f614dfaaecf0fae3771d2000000000000000000000000000000000000000000000000000000000b51cbf0	16112856	0x6bf7f93e5e8336dfa7528048c1772094e0279a445b5c6f4ecb228f378109ffc9
34250	0x975f951b2b85a402b67ec14b92417ba76d6d38e9beabb0d12bacb86915094e60	0xc276cd4991bfbdaebd24eb604071b2f64f986da2	0x9ca8887d13bc4591ae36972702fdf9de2c97957f	0	0x42842e0e000000000000000000000000c276cd4991bfbdaebd24eb604071b2f64f986da2000000000000000000000000f82efd982ff5980166032f18c7082f39fb6cd32b0000000000000000000000000000000000000000000000000000000000004783360c6ebe	16112856	0x6bf7f93e5e8336dfa7528048c1772094e0279a445b5c6f4ecb228f378109ffc9
34252	0xe4848b9f411e8040da709ef8c9234c7271a77357deb451d4f37e3dc3b8a2305f	0xa9bd318a4ca1747e6068d100e18711b529386e29	0xed700b39a8de61d16a4318261baeb70680685064	5.13e+16	0x	16112856	0x6bf7f93e5e8336dfa7528048c1772094e0279a445b5c6f4ecb228f378109ffc9
34255	0xe478b0947572ecb1989e3276c3a352b3a771260027c6dc428d6bcdf887001cbb	0xb36f9f412959f40ca65599bfd6ac67d5b883d1d6	0xc02aaa39b223fe8d0a0e5c4f27ead9083c756cc2	1e+16	0xd0e30db0	16112856	0x6bf7f93e5e8336dfa7528048c1772094e0279a445b5c6f4ecb228f378109ffc9
34256	0x08f47694d1419b098c44fd897da4118a2258a1a3fd7553e55b2f7c60ad5acf46	0xb9ddb9fe0ef8df1b1f6d9452c0f89f014d2b3067	0x3ab16af1315dc6c95f83cbf522fecf98d00fd9ba	0	0xb6b55f2500000000000000000000000000000000000000000000017da21979b2a0319000	16112856	0x6bf7f93e5e8336dfa7528048c1772094e0279a445b5c6f4ecb228f378109ffc9
34258	0x486ae5218fc313e7909974c20256a625fc1d1c33ce4980b080ec69a36cb42a4f	0x0a4e1a270c7aaad91afbbf55fdc0e32c4771a98d	0x12b180b635dd9f07a78736fb4e43438fcdb41555	0	0xa22cb4650000000000000000000000001e0049783f008a0085193e00003d00cd54003c710000000000000000000000000000000000000000000000000000000000000000	16112856	0x6bf7f93e5e8336dfa7528048c1772094e0279a445b5c6f4ecb228f378109ffc9
34260	0x01b8099abf3227e0d111adff916c20ececf4a9369aa6a0332530a170fa6bbee3	0xa8e6ec181bc616c6c22c42bc5f5d52ca63955ea6	0xdac17f958d2ee523a2206206994597c13d831ec7	0	0xa9059cbb000000000000000000000000d29b0dbf8d37e858ac8adc4c107462e45d4b857800000000000000000000000000000000000000000000000000000000090f5600	16112856	0x6bf7f93e5e8336dfa7528048c1772094e0279a445b5c6f4ecb228f378109ffc9
34261	0x33eedb119a658ed91143d996ef509c760ec3f28061f40fe330b8d673f66d054a	0x5c6edf201ac2db0b169288793dc2b5fb36a89f1e	0xc6dca8e9c9eb5a7eb68b04a69e63352d5d98695c	0	0x5b70ea9f	16112856	0x6bf7f93e5e8336dfa7528048c1772094e0279a445b5c6f4ecb228f378109ffc9
34263	0xe7b7120f0757d628f3fb08a8485fea4c19f63ea1366f119e2f27d360683093a2	0x830bcfdadfdd9acfdff494f4e21b0d01557473c7	0x00000000006c3852cbef3e08e8df289169ede581	0	0xfd9f1e100000000000000000000000000000000000000000000000000000000000000020000000000000000000000000000000000000000000000000000000000000000500000000000000000000000000000000000000000000000000000000000000a0000000000000000000000000000000000000000000000000000000000000052000000000000000000000000000000000000000000000000000000000000009a00000000000000000000000000000000000000000000000000000000000000e2000000…	16112856	0x6bf7f93e5e8336dfa7528048c1772094e0279a445b5c6f4ecb228f378109ffc9
34265	0x439740739fe0f9c929e86921c32376a902a67a385d2842de59d860e78b8e38d1	0x2f0d5fa5bc9f301b6bf7250df4723d18bbed1166	0xcbe45bf0577f3686713948425ba6910d894583a6	1200000000000000	0x	16112856	0x6bf7f93e5e8336dfa7528048c1772094e0279a445b5c6f4ecb228f378109ffc9
34268	0x07fcaf69b5a8a63dd0c990bd7e00e59c482cf5e678faa9b05f42e5165ee16432	0x03cdfd100ee1faa56c73f60f8747c0257b7fe369	0xaf1f5ebb5521c27ddcfa4864da673438d691ac33	7.95e+18	0x	16112856	0x6bf7f93e5e8336dfa7528048c1772094e0279a445b5c6f4ecb228f378109ffc9
34270	0xc796f357738479db3812eaa0a341eff5ae598e14637fcb50dfb51247fbc4c254	0x974caa59e49682cda0ad2bbe82983419a2ecc400	0xb4d6dc0b4851a5987833555834274aac6f0b8427	8.18e+16	0x	16112856	0x6bf7f93e5e8336dfa7528048c1772094e0279a445b5c6f4ecb228f378109ffc9
34271	0xe433fd3bc635aebe05819d7f660440ad67782b563dc3030db4ad4eaf1754569a	0x950cd838d9e5994d197967328e5ac0ae8fd5d9ad	0x46cdd0bbf655740df3051892caeea6731f4165e4	1e+16	0x	16112856	0x6bf7f93e5e8336dfa7528048c1772094e0279a445b5c6f4ecb228f378109ffc9
34272	0x6070d91896125c422fafc5c7c4ad147815decb76c0e49c695b00c2f96273ea7d	0x800dbfe325454b31284950c88b37340cbcbe397c	0x7a250d5630b4cf539739df2c5dacb4c659f2488d	0	0x18cbafe50000000000000000000000000000000000000000000000000000e43cd8d3b7b2000000000000000000000000000000000000000000000000022b339e98af72e000000000000000000000000000000000000000000000000000000000000000a0000000000000000000000000800dbfe325454b31284950c88b37340cbcbe397c00000000000000000000000000000000000000000000000000000000638cd54f000000000000000000000000000000000000000000000000000000000000000200000…	16112856	0x6bf7f93e5e8336dfa7528048c1772094e0279a445b5c6f4ecb228f378109ffc9
34273	0x448e56ee1a094d2c01b6f6f69eda14fb0aa13ea9fa5cc6f1cfb9fb6f2d4ddd51	0xfcf951562b0ff16c8e460b73aeff8432e15f0a48	0x00000000006c3852cbef3e08e8df289169ede581	0	0xfb0f3ee10000000000000000000000000000000000000000000000000000000000000020000000000000000000000000bc4e8115e17d96cfd8e3ecef2b0d6e19d00f70b2000000000000000000000000000000000000000000000000000000000000106f0000000000000000000000000000000000000000000000000000000000000001000000000000000000000000babcdad3b3cda6ca7041a87253529d49658c7d59000000000000000000000000004c00500000ad104d7dbd00e3ae0a5c00560c0000000…	16112856	0x6bf7f93e5e8336dfa7528048c1772094e0279a445b5c6f4ecb228f378109ffc9
34274	0x60c5e0e61c4ef2af1fe0df29dc7c37ea1b134a5afdb1578ce62278220d555d7d	0x20056c9bb0a0626a5b8bfe0bdbbc2d2e19cd96bf	0x68b3465833fb72a70ecdf485e0e4c7bd8665fc45	1.33e+17	0x5ae401dc00000000000000000000000000000000000000000000000000000000638cd9bf00000000000000000000000000000000000000000000000000000000000000400000000000000000000000000000000000000000000000000000000000000001000000000000000000000000000000000000000000000000000000000000002000000000000000000000000000000000000000000000000000000000000000e4472b43f300000000000000000000000000000000000000000000000001d812753b747…	16112856	0x6bf7f93e5e8336dfa7528048c1772094e0279a445b5c6f4ecb228f378109ffc9
34276	0xb6c7a785c4096bd256eec2533d2295ea95eb1126eec4a479b988336a8e3e9aa2	0x26c9fc612b005781127246bbc5dc39f823e3106e	0xeeeec6476073778077b40a73fe32e23a9876cab4	7.95e+16	0x2b66d72e000000000000000000000000000000000000000000000000000000000000002000000000000000000000000000000000000000000000000000000000000000ee65794a68624763694f694a46557a49314e694973496d74705a434936496a64684e6a526c5a6d51314c544a694e4463744e475a6a5a6931684f4463784c5445785a6d59354f5451345954646a4f434a392e436763784d6a55334c6a673445674e56553051614a44426a4d6a67314d7a5a694c5449354f546b744e4755335a533034596…	16112856	0x6bf7f93e5e8336dfa7528048c1772094e0279a445b5c6f4ecb228f378109ffc9
34277	0xad854f18ace6495295b00ddab6a3a0999b0e5e84e6d2261def86060a20ac8e5c	0x1be210e7990eff6c07cb8cadcb9d077063ac3614	0xbf274f3eecf3b1dfd4e3e76371f2c507dd37c72e	2100000000000000	0x	16112856	0x6bf7f93e5e8336dfa7528048c1772094e0279a445b5c6f4ecb228f378109ffc9
34279	0x8db35fc969bf52463c2e3e22d6c0750a33ad84e50f216174329fffa43004e755	0x1be210e7990eff6c07cb8cadcb9d077063ac3614	0x6b5653127841b63390ac4b285c06d72952dbf2ed	2100000000000000	0x	16112856	0x6bf7f93e5e8336dfa7528048c1772094e0279a445b5c6f4ecb228f378109ffc9
34283	0x76dc964a47c54fb246ed88f015ed2f27d72f2b69dc1002d541ed242675eb380f	0x6bc5a51d2335f8f86cc1065cf58e4273eb9d6a87	0x00000000006c3852cbef3e08e8df289169ede581	0	0xe7acab24000000000000000000000000000000000000000000000000000000000000008000000000000000000000000000000000000000000000000000000000000006600000007b02230091a7ed01230072f7006a004d60a8d4e71d599b8104250f0000000000000000000000000000000000000000000000000000000000000000000000000000000000000000000000000000000000000000000000000000000000a0000000000000000000000000000000000000000000000000000000000000000100000…	16112856	0x6bf7f93e5e8336dfa7528048c1772094e0279a445b5c6f4ecb228f378109ffc9
34285	0x1fd94181598c16a4d8144dc02836b595ac1230132423b145f5c72ee9b528cc41	0x017bd64704cfce1a624201f62f0b87f4ddae13a5	0xbfef411d9ae30c5b471d529c838f1abb7b65d67f	6641	0xfd13825d00000000000000000000000000000000000000000000000000000000c51624ab0000000000000000000000000000000000000000000000301a9c4c23669d26cf000000000000000000000000a40bb1c47f6dd27142a2bd7c93bfa98db9d1f5c5000000000000000000000000a0b86991c6218b36c1d19d4a2e9eb0ce3606eb4800000000000000000000000000000000000000000000000000000000000000000000000000000000000000000000000000000000000000000000000000f5dcd900000…	16112856	0x6bf7f93e5e8336dfa7528048c1772094e0279a445b5c6f4ecb228f378109ffc9
34287	0x6f8895180e74dd55cfd47e4fd908ed10d271b15e140c1604e2aba34e75941261	0xc1dfe6c2e54b9da025a6cdb624edfb1cd6d0d2db	0x3f41480dd3b32f1cc579125f9570dccd07e07667	0	0xbf4b3e65	16112856	0x6bf7f93e5e8336dfa7528048c1772094e0279a445b5c6f4ecb228f378109ffc9
34290	0xf3ca94640ae8a398e5899ed69ff1cae47c01484bd892c5d77cbe04fa8cbcc27b	0x47bc4b286e8186f8e9f155da7136a050444849c9	0xdac17f958d2ee523a2206206994597c13d831ec7	0	0x095ea7b3000000000000000000000000040993fbf458b95871cd2d73ee2e09f4af6d56bb0000000000000000000000000000000000000000000000000000000000000000	16112856	0x6bf7f93e5e8336dfa7528048c1772094e0279a445b5c6f4ecb228f378109ffc9
34291	0xa08ef3d31414d8c743d23a89a8bee246a39ffdc50f7b5edc0d6eaf6243c84423	0x0b8e5ae378bcb44018a2659d81cbba65622beb3a	0x34d85c9cdeb23fa97cb08333b511ac86e1c4e258	0	0xa22cb46500000000000000000000000000000000000111abe46ff893f3b2fdf1f759a8a80000000000000000000000000000000000000000000000000000000000000001	16112856	0x6bf7f93e5e8336dfa7528048c1772094e0279a445b5c6f4ecb228f378109ffc9
34292	0x59a8c3bdf1c179ffacffb3f693ac985fe7e54b6e024e9d9a4de585a19ca028e2	0xc64bd5763db00fe121bafd9372f9b3632ab1bb77	0x881d40237659c251811cec9c364ef91dc08d300c	0	0x5f5755290000000000000000000000000000000000000000000000000000000000000080000000000000000000000000a0b86991c6218b36c1d19d4a2e9eb0ce3606eb48000000000000000000000000000000000000000000000000000000004d7c6d0000000000000000000000000000000000000000000000000000000000000000c00000000000000000000000000000000000000000000000000000000000000017616972737761704c696768743346656544796e616d696300000000000000000000000…	16112856	0x6bf7f93e5e8336dfa7528048c1772094e0279a445b5c6f4ecb228f378109ffc9
34293	0x4067ed3c7efc83b3bf112f4bacd6dd772d9ed6c0fbf57d4375e59b499f9f9801	0x1be210e7990eff6c07cb8cadcb9d077063ac3614	0xea97c7491ef7cc3c0208d81c7944c26725817654	2100000000000000	0x	16112856	0x6bf7f93e5e8336dfa7528048c1772094e0279a445b5c6f4ecb228f378109ffc9
34294	0x2db543e9c21ebd3d69ca9bc3b3861433e186372f01015d48274b1ea6b861aac0	0x9696f59e4d72e237be84ffd425dcad154bf96976	0x18770127d153e831a8a7c5247d367147aab8e8bf	2.18e+17	0x	16112856	0x6bf7f93e5e8336dfa7528048c1772094e0279a445b5c6f4ecb228f378109ffc9
34295	0xa7183d5f0c25c113f636a9868e29d70b1033ecf70f1ec855764616f28a8caba6	0xa8d081af37cb596414a194f1918be83612088b7a	0xc6dca8e9c9eb5a7eb68b04a69e63352d5d98695c	0	0xa22cb4650000000000000000000000001e0049783f008a0085193e00003d00cd54003c710000000000000000000000000000000000000000000000000000000000000001	16112856	0x6bf7f93e5e8336dfa7528048c1772094e0279a445b5c6f4ecb228f378109ffc9
34296	0x4dfde32004f79237120e93a3e36475edb74f624abc000b7842c923958cddaaa6	0x342a01c7614b2ea56d074f0a3d5ef15f268010f7	0xe2c8e69f628bb0c284fbe9f2327ce6f77a047602	5e+16	0x	16112856	0x6bf7f93e5e8336dfa7528048c1772094e0279a445b5c6f4ecb228f378109ffc9
34297	0xc640be46a9237278ae79fd83f0534a1a7beba1bce65198d30699e151bc30c14d	0x4d246d0fd2e465f3c4ae9be0b7a0f8ba046e5c50	0xdac17f958d2ee523a2206206994597c13d831ec7	0	0xa9059cbb000000000000000000000000e333b592afebaaf203997b3318c6f1714545023c0000000000000000000000000000000000000000000000000000000008f07bc6	16112856	0x6bf7f93e5e8336dfa7528048c1772094e0279a445b5c6f4ecb228f378109ffc9
34298	0x804048d9846cbc8e1bdc93999c7274aed23fe276dee6507f16c760b004d48e23	0xb76d912d766c75112de1c0aff6858cea02d0493d	0x76f4eed9fe41262669d0250b2a97db79712ad855	0	0xf17a454600000000000000000000000000000000000000000000000000000000000000c000000000000000000000000000000000000000000000000000000000000001a0000000000000000000000000000000000000000000002451089bea0ea5f9c380000000000000000000000000000000000000000000002450f0cf02a4c82e42540000000000000000000000001d64fb0ffa8362b2e1ee7ee03929159551eab26e000000000000000000000000000000000000000000000000000000000000022000000…	16112856	0x6bf7f93e5e8336dfa7528048c1772094e0279a445b5c6f4ecb228f378109ffc9
34300	0x3eef87ab9a009166f60105f551289d1708e7c2b373a161580ff9913059b46bc7	0x52eacc0efbd89bbf6018cbead6113c32f105863b	0xa0b86991c6218b36c1d19d4a2e9eb0ce3606eb48	0	0x095ea7b3000000000000000000000000198457da5e7f7b7fd916006837417dcf663f692d0000000000000000000000000000000000000000000000000000000000000000	16112856	0x6bf7f93e5e8336dfa7528048c1772094e0279a445b5c6f4ecb228f378109ffc9
34301	0x1dd8f6266650fad2adae3dbe88f39583590f99482630ce2b82bda4c4e1983286	0xa988f51c48ec81835dbd36c4f72e12264cefd612	0xe2591bd3d77e4ab6a477b8fc776a36f7aee13a1d	8890000000000000	0x	16112856	0x6bf7f93e5e8336dfa7528048c1772094e0279a445b5c6f4ecb228f378109ffc9
34303	0xf94e29224addde6de337ae165720032ef4a85ee99e9bac794f3a147b5e7dc73a	0xa6c0f7bde119930fb919ed02f8155887ecf0d756	0xb43e886c7d7d4b3eda65e016b5bcef56548aeb7b	1e+16	0x0115e1c6000000000000000000000000a6c0f7bde119930fb919ed02f8155887ecf0d7560000000000000000000000000000000000000000000000000000000000000001	16112856	0x6bf7f93e5e8336dfa7528048c1772094e0279a445b5c6f4ecb228f378109ffc9
34304	0xbb8df23f04b9cf16160c36dd63c383fefb36c960fee19e1e6755fc401f22b90c	0x8750b317bde325ec06976a46f8418bbc1ca55902	0xfc35515a1bafb9def052d82459598cf74edb8888	0	0x01db00000000036c3099428e6412000003665b944aa3c5cb021a11b1f53204d03e5529f09eb3091939e4fd8c9cf300032f1bec4db6c3bc499f3dbf289f5499c30d541fec970103de	16112856	0x6bf7f93e5e8336dfa7528048c1772094e0279a445b5c6f4ecb228f378109ffc9
34307	0x98ce20c0bd8ff5fb75318353ee2dd296618701cc5a203e011cd3d4d863b2ba46	0xdfd5293d8e347dfe59e90efd55b2956a1343963d	0xe948e7bfef82d1e72a12071eccb867a110fba034	1.98e+18	0x	16112856	0x6bf7f93e5e8336dfa7528048c1772094e0279a445b5c6f4ecb228f378109ffc9
34308	0x18a9d5319e8631857ab1b5a32058f2c24e9d787b771e8a697504c036bef97e2b	0x13f45e0abf192a648a5b94741573ddfa869a5bad	0x53e0e51b5ed9202110d7ecd637a4581db8b9879f	2e+16	0x7ff36ab5000000000000000000000000000000000000000000000000000000017485ef89000000000000000000000000000000000000000000000000000000000000008000000000000000000000000013f45e0abf192a648a5b94741573ddfa869a5bad00000000000000000000000000000000000000000000000000000000638cd7690000000000000000000000000000000000000000000000000000000000000003000000000000000000000000c02aaa39b223fe8d0a0e5c4f27ead9083c756cc200000…	16112856	0x6bf7f93e5e8336dfa7528048c1772094e0279a445b5c6f4ecb228f378109ffc9
34310	0xfd54530f0c352d08b53dae6d62aa9a3554962899b04bd78542cd02dc2cb499b1	0x0717ba2152b8b4763e3ea1fdea7eebf16c54070b	0x00000000006c3852cbef3e08e8df289169ede581	5.02e+16	0xed98a57400000000000000000000000000000000000000000000000000000000000000a000000000000000000000000000000000000000000000000000000000000009c00000000000000000000000000000000000000000000000000000000000000ae00000007b02230091a7ed01230072f7006a004d60a8d4e71d599b8104250f00000000000000000000000000000000000000000000000000000000000000000002000000000000000000000000000000000000000000000000000000000000000200000…	16112855	0x06ebb5b049957c6837a12acafe7e3f021be457c939664bba2188ad54f1abb88f
34311	0x38b5e0c39f9edb90345478b100f4e1af7ccf450cd8d92b926d2d029ee1046389	0xa4e5961b58dbe487639929643dcb1dc3848daf5e	0x50ea1d7a6f198e1597d44a5df93d572be172ad7a	1240000000000000	0x	16112855	0x06ebb5b049957c6837a12acafe7e3f021be457c939664bba2188ad54f1abb88f
34314	0xd63c57dbd981622df71982d7662b7875b59ae93876b378197153ef923fb1508b	0x4d0c7bb23a67ce2a08c7dd46a2c35c87d837d028	0xcf95065ceb0168fdb49146a344e52c64947a35ed	5.7e+18	0x	16112855	0x06ebb5b049957c6837a12acafe7e3f021be457c939664bba2188ad54f1abb88f
34315	0x53072b67ee09f8ebcfd791ad498bf05065466da253e7bda4bc4768b32e7bf052	0x1fecc6d7dbf785d970b56fe2c6d0a91b25a5552d	0x00000000006c3852cbef3e08e8df289169ede581	1.29e+17	0xfb0f3ee100000000000000000000000000000000000000000000000000000000000000200000000000000000000000000000000000000000000000000000000000000000000000000000000000000000000000000000000000000000000000000000000000000000000000000000000000000000000000000000000001b36293613960000000000000000000000000003867188546d5c489865c236ee42b303a82caa886000000000000000000000000004c00500000ad104d7dbd00e3ae0a5c00560c0000000…	16112855	0x06ebb5b049957c6837a12acafe7e3f021be457c939664bba2188ad54f1abb88f
34317	0xf7411a712ae06915e5db56b5c23e50b9ccf3f1632c648c97ed9d9ea485a3c58b	0x685c99e8780e5a7f158617cc2e9acc0e45a66120	0x57f1887a8bf19b14fc0df6fd9b2acc9af147ea85	0	0x42842e0e000000000000000000000000685c99e8780e5a7f158617cc2e9acc0e45a661200000000000000000000000006049c0e5c4ef4463dba8b80b6515195f7462c65e5afbc217330ed2406972b5736331a09fbe66ad8c0b1392be8f2b4212b7a3b368	16112855	0x06ebb5b049957c6837a12acafe7e3f021be457c939664bba2188ad54f1abb88f
34319	0xff29a5b688e0b3c814da743d73302b83bc5e46834adb257e419dcc4c76f69929	0x522854311f30f812cbd7f7cae27d8b6a5f25b67e	0xeeeec6476073778077b40a73fe32e23a9876cab4	7.95e+16	0x2b66d72e000000000000000000000000000000000000000000000000000000000000002000000000000000000000000000000000000000000000000000000000000000ee65794a68624763694f694a46557a49314e694973496d74705a434936496a64684e6a526c5a6d51314c544a694e4463744e475a6a5a6931684f4463784c5445785a6d59354f5451345954646a4f434a392e436763784d6a55334c6a673445674e56553051614a4449354d54417a4e4468694c5445774f4455744e4455774e6930354d4…	16112855	0x06ebb5b049957c6837a12acafe7e3f021be457c939664bba2188ad54f1abb88f
34320	0xd36621dd7ce53fc829461a03a9889bdc7dd7b6a29449ea7903131f8bc73e60cb	0x5d7b357e385175ee83a9f29eb7c1241f46352379	0x0b4eb75832d98c7b7478502ccaa07d6c2618c42f	2.98e+16	0x	16112855	0x06ebb5b049957c6837a12acafe7e3f021be457c939664bba2188ad54f1abb88f
34323	0x9ffcf7da75062e23fed59cb0b30688c630cd75bb28bf65415b78fa4a0cbb5813	0x5fb1b08d6b6c5430bd8163b93f312d7ab4f17d16	0x20d44b21669313bb59d85885f90ddf08e97100f1	1590000000000000	0x	16112855	0x06ebb5b049957c6837a12acafe7e3f021be457c939664bba2188ad54f1abb88f
34330	0xeb552994c82f770abfff318ebf3e41c18ff8aaf86fa11e18210b367721d1de57	0xffec0067f5a79cff07527f63d83dd5462ccf8ba4	0x7fc66500c84a76ad7e9c93437bfc5ac33e2ddae9	0	0xa9059cbb0000000000000000000000007c87dd890b7ce07bc5501657faf58775f0a5b415000000000000000000000000000000000000000000000000aba33a540705d2c0	16112855	0x06ebb5b049957c6837a12acafe7e3f021be457c939664bba2188ad54f1abb88f
34333	0x9a2269d4c56665f7f640425ac492034db69be065eb85c11b850340c0e13b9799	0x0acdd0fefb605957dfcba4816d77c43dec3f1f79	0x95ddbd7f9e8035c7af70da2071d57cc388f176ee	3000000000000000	0x	16112855	0x06ebb5b049957c6837a12acafe7e3f021be457c939664bba2188ad54f1abb88f
34334	0x56f402928b807e54a274df2e488766cb9fd57f2976edd82d4db1c7fb94f2b257	0x512fce9b07ce64590849115ee6b32fd40ec0f5f3	0xbafa44efe7901e04e39dad13167d089c559c1138	4.41e+19	0x4dcd4547000000000000000000000000512fce9b07ce64590849115ee6b32fd40ec0f5f3	16112855	0x06ebb5b049957c6837a12acafe7e3f021be457c939664bba2188ad54f1abb88f
34336	0x286711cc5a45a886054d0d804b020844aa570ce1e2dc3ee84c53c33c6ef865bd	0xf87e2e7c574843a65eb39b7b3f2e18f56e75450a	0x90c387c98c3f983c0c43bf9f3b186185ab2b2cfc	0	0xe426a8f1000000000000000000000000ae461ca67b15dc8dc81ce7615e0320da1a9ab8d5000000000000000000000000a0b86991c6218b36c1d19d4a2e9eb0ce3606eb480000000000000000000000006b175474e89094c44da98b954eedeac495271d0f00000000000000000000000000000000000000000000000000000000000003e8	16112855	0x06ebb5b049957c6837a12acafe7e3f021be457c939664bba2188ad54f1abb88f
34338	0xc0f2c8895f6f97221fc7a7813060a67777dc834821781d559480385745f6774c	0xb61d89386aaf9403d267aff40ecc26ada3c15ac2	0x4a220e6096b25eadb88358cb44068a3248254675	0	0xa9059cbb000000000000000000000000913b0c2ccb35ab0f1a8ee09b96e1e9de44aeead80000000000000000000000000000000000000000000000006fefdb1267e0cafd	16112855	0x06ebb5b049957c6837a12acafe7e3f021be457c939664bba2188ad54f1abb88f
34340	0x24b5e9c3d2e6213910b22e49d43f27d923863fee8b4ecc047f7bb8ecfc31cf68	0xeb9d0e3ba530c03d0ca581d42406b51c628c7e61	0x68b3465833fb72a70ecdf485e0e4c7bd8665fc45	0	0x5ae401dc00000000000000000000000000000000000000000000000000000000638cdbf30000000000000000000000000000000000000000000000000000000000000040000000000000000000000000000000000000000000000000000000000000000300000000000000000000000000000000000000000000000000000000000000600000000000000000000000000000000000000000000000000000000000000160000000000000000000000000000000000000000000000000000000000000028000000…	16112855	0x06ebb5b049957c6837a12acafe7e3f021be457c939664bba2188ad54f1abb88f
34342	0x47bddd49da278aad1d4daeb53e5eee5855ee2226b26fbe0f9b4ee9d80fffbdff	0x2c145c6356101580d78c3ab7874dda6c46a1a05e	0x68b3465833fb72a70ecdf485e0e4c7bd8665fc45	2.15e+17	0x5ae401dc00000000000000000000000000000000000000000000000000000000638cdbff000000000000000000000000000000000000000000000000000000000000004000000000000000000000000000000000000000000000000000000000000000020000000000000000000000000000000000000000000000000000000000000040000000000000000000000000000000000000000000000000000000000000016000000000000000000000000000000000000000000000000000000000000000e45023b…	16112855	0x06ebb5b049957c6837a12acafe7e3f021be457c939664bba2188ad54f1abb88f
34344	0x4f6924746907be62d7667a6b750a8acdf3093412b62f785713b8718a86d43b28	0xcc01a0a8c3c242329eb3ca23581cb640e3086f1f	0x0000000000c2d145a2526bd8c716263bfebe1a72	0	0x32389b7100000000000000000000000000000000000000000000000000000000000000400000007b02230091a7ed01230072f7006a004d60a8d4e71d599b8104250f00000000000000000000000000000000000000000000000000000000000000000001000000000000000000000000000000000000000000000000000000000000002000000000000000000000000000000000000000000000000000000000000000600000000000000000000000002893d2045a136e8cafa521425ce8349a0d3e1de300000…	16112855	0x06ebb5b049957c6837a12acafe7e3f021be457c939664bba2188ad54f1abb88f
34345	0x9408f7aa52f22a80c676164501b2fa53593783d9af4e006cf2ccff4bbeb7b71e	0xfeebabe6b0418ec13b30aadf129f5dcdd4f70cea	0xebec795c9c8bbd61ffc14a6662944748f299cacf	1.64e+16	0x	16112855	0x06ebb5b049957c6837a12acafe7e3f021be457c939664bba2188ad54f1abb88f
34346	0x9afaadde8843f20e46a949d0d9be712cd7da8cc3e383418fb476b85dced8924a	0xcdc8488e63a403bfd580222ea0f3719477bfea9c	0x3506424f91fd33084466f402d5d97f05f8e3b4af	0	0xa9059cbb000000000000000000000000955c45eb7c70bbcad19c6ba0b8d07926ef36e588000000000000000000000000000000000000000000000007068fb1598aa00000	16112855	0x06ebb5b049957c6837a12acafe7e3f021be457c939664bba2188ad54f1abb88f
34348	0xc72556d5613402dca8f6d4e2c82f29411069c01a9b3bfec5c71b72e08c03c31d	0x705d2488020b87cac572c58999832b771c8f6e80	0x172401c05a6f9d569d731f747d3bfd66b1c68e54	0	0x095ea7b300000000000000000000000068b3465833fb72a70ecdf485e0e4c7bd8665fc45ffffffffffffffffffffffffffffffffffffffffffffffffffffffffffffffff	16112855	0x06ebb5b049957c6837a12acafe7e3f021be457c939664bba2188ad54f1abb88f
34352	0x76c1dc33202557da082a54f464fd9705f0b3434cf10bea11a97b8d2220558eae	0x349ef5478a64939a71e415bbc6fb88f1343a4392	0x8f34745ef696b2e535690a6baea5d3acfa19c1e5	2.34e+16	0x	16112855	0x06ebb5b049957c6837a12acafe7e3f021be457c939664bba2188ad54f1abb88f
34353	0x67a033b3d90d288534fe1a4ad5c0c784d4582db70f7c7d7473b0cbdd0a715a21	0x227f524488ff31f4035b0b88f8f915a29edab468	0x4fabb145d64652a948d72533023f6e7a623c7c53	0	0xa9059cbb00000000000000000000000078f37dcf42a37ddee4439281c82417ee8a4da71000000000000000000000000000000000000000000000000da14295aa1724ce05	16112855	0x06ebb5b049957c6837a12acafe7e3f021be457c939664bba2188ad54f1abb88f
34354	0x64305d0ca3be30a37d3fc39dec673ec6b5581777df6d929175896b1b8135dad8	0x73cca97b6d0b6ea0ac07388080b866a7ac8a641a	0xdac17f958d2ee523a2206206994597c13d831ec7	0	0xa9059cbb000000000000000000000000e886334ae81f3c53f178b69ccd420e6166dadeeb000000000000000000000000000000000000000000000000000000003f2fb6b8	16112855	0x06ebb5b049957c6837a12acafe7e3f021be457c939664bba2188ad54f1abb88f
34357	0xbf52b407e41d86e6de9c92440bdefa7b65963c251a09033f0cc2ffe9bf609435	0xe60b4c3bc1760e377eedaf9f23bb1c1b7a7bfc2d	0x68b3465833fb72a70ecdf485e0e4c7bd8665fc45	9100000000000000	0x5ae401dc00000000000000000000000000000000000000000000000000000000638cdbcf00000000000000000000000000000000000000000000000000000000000000400000000000000000000000000000000000000000000000000000000000000001000000000000000000000000000000000000000000000000000000000000002000000000000000000000000000000000000000000000000000000000000000e404e45aaf000000000000000000000000c02aaa39b223fe8d0a0e5c4f27ead9083c756…	16112855	0x06ebb5b049957c6837a12acafe7e3f021be457c939664bba2188ad54f1abb88f
34358	0xd6a740f3f1fd73228a3a3d980c8bfef7bb893f75088d806d3b581783927a2720	0x517f0fd1a317217c0515f34a9165ecda5dc4deb1	0x68b3465833fb72a70ecdf485e0e4c7bd8665fc45	8980000000000000	0x5ae401dc00000000000000000000000000000000000000000000000000000000638cdbf3000000000000000000000000000000000000000000000000000000000000004000000000000000000000000000000000000000000000000000000000000000020000000000000000000000000000000000000000000000000000000000000040000000000000000000000000000000000000000000000000000000000000016000000000000000000000000000000000000000000000000000000000000000e442712…	16112855	0x06ebb5b049957c6837a12acafe7e3f021be457c939664bba2188ad54f1abb88f
34359	0x46c50fc051805f535049a4459a35827049bfe9f0666216cdfe85585951e414f4	0x1be210e7990eff6c07cb8cadcb9d077063ac3614	0xdb373c6c23d0dbeae2f4da3dbabfcc19b8adcef8	2100000000000000	0x	16112855	0x06ebb5b049957c6837a12acafe7e3f021be457c939664bba2188ad54f1abb88f
34360	0xc8debde4669794c17f324cd8266ceb841e9b46bfb7fa1501a285344020dbe087	0x4e107d47b8cd793a82c59c83bf686760f2caba36	0x68b3465833fb72a70ecdf485e0e4c7bd8665fc45	1e+17	0x5ae401dc00000000000000000000000000000000000000000000000000000000638cd99b00000000000000000000000000000000000000000000000000000000000000400000000000000000000000000000000000000000000000000000000000000001000000000000000000000000000000000000000000000000000000000000002000000000000000000000000000000000000000000000000000000000000000e404e45aaf000000000000000000000000c02aaa39b223fe8d0a0e5c4f27ead9083c756…	16112855	0x06ebb5b049957c6837a12acafe7e3f021be457c939664bba2188ad54f1abb88f
34361	0xdabb4ec566806a4a9923d98f4683edcf8fc7ac9f44ee959cc207fa8653b9b72e	0x1be210e7990eff6c07cb8cadcb9d077063ac3614	0xf91b7b38e4e683668142831c6618bd12c3ec4908	2100000000000000	0x	16112855	0x06ebb5b049957c6837a12acafe7e3f021be457c939664bba2188ad54f1abb88f
34363	0x6fca674db62763ea043e57c50df87fe5bf598f290f0df252454081843a73b26c	0x1be210e7990eff6c07cb8cadcb9d077063ac3614	0x11ac1eab71bf839cbcc7270e31f59bbb4a8b030d	2100000000000000	0x	16112855	0x06ebb5b049957c6837a12acafe7e3f021be457c939664bba2188ad54f1abb88f
34365	0xf60a36f8f057b1fecce4f733a2e626913396355a2499bca16f340d9ce1862774	0xebd74347f8e8ed574f9c19734d587230ac33cce5	0x5ba2de13ee838aa85f23016bf0db2abec570c179	1480000000000000	0x	16112855	0x06ebb5b049957c6837a12acafe7e3f021be457c939664bba2188ad54f1abb88f
34366	0xab94046ff2656830ec49cf9e11cdb338daa9bd458b19782e120712d46b6102e0	0x235889f9b4f3b467548f84c40e8e6c2da04b6522	0x7a250d5630b4cf539739df2c5dacb4c659f2488d	5e+16	0x7ff36ab5000000000000000000000000000000000000000000000000000002a812618baf0000000000000000000000000000000000000000000000000000000000000080000000000000000000000000235889f9b4f3b467548f84c40e8e6c2da04b652200000000000000000000000000000000000000000000000000000000638cd5240000000000000000000000000000000000000000000000000000000000000002000000000000000000000000c02aaa39b223fe8d0a0e5c4f27ead9083c756cc200000…	16112855	0x06ebb5b049957c6837a12acafe7e3f021be457c939664bba2188ad54f1abb88f
34368	0xeb1ff305384ea21d861974d8d1add553c477478c8d7cbde81b0f4c240ef2a05b	0x05cdb1526f6e224e02919a4c018d9784ea25eb3d	0xa0b86991c6218b36c1d19d4a2e9eb0ce3606eb48	0	0xa9059cbb0000000000000000000000005b0637f75467b18d0f67d72348d89437e6c5f53e0000000000000000000000000000000000000000000000000000000039387000	16112855	0x06ebb5b049957c6837a12acafe7e3f021be457c939664bba2188ad54f1abb88f
34370	0xbc4a67f0ab1aee8c7a7cd482705282e74e44ac771bdaca5deb78b770f5b05332	0x963ad45a9084068b033684e97930d5541d44282a	0xdc24316b9ae028f1497c275eb9192a3ea0f67022	6.12e+17	0x0b4c7e4d000000000000000000000000000000000000000000000000087d77b9325369280000000000000000000000000000000000000000000000000e061b18f9d8b5080000000000000000000000000000000000000000000000001539e09237238cc4	16112855	0x06ebb5b049957c6837a12acafe7e3f021be457c939664bba2188ad54f1abb88f
34372	0xfbea88b3ed3f24958c33f9f5edee1bcad989939948a5a594cc29900777a27f90	0x6887246668a3b87f54deb3b94ba47a6f63f32985	0x5e4e65926ba27467555eb562121fac00d24e9dd2	0	0xd0f893440002b44c790000da0000080000000000000000000000000000000000001b00000000638cd4db0000f5dc9f00001b00000000638cd4db0000f5dca100002b00000000638cd4ea0000f5dca100002100000000638cd4ea0000f5dca200002800000000638cd4f90000f5dca200001d00000000638cd4f90000f5dca300001300000000638cd5080000f5dca3789cec7d773cd5fbfff839c72eb2b347c88a6ce7901d3232222433a344c816e21845c8c8b1d79b903d22d9ca9e859491cc32b2b2b2f37b5…
34373	0xd557a9f7ca0c9ce06843c4a8133c69e39614fcdab160a31f2866b6da8e901242	0x1be210e7990eff6c07cb8cadcb9d077063ac3614	0xc61fa9e270f532b2a72e23db26d6d1b1a8ddc1c2	2100000000000000	0x	16112855	0x06ebb5b049957c6837a12acafe7e3f021be457c939664bba2188ad54f1abb88f
34374	0xd03e6fa7f242b8ace7584ca0ac384904e1bcf4ed59052f9eea7dc3e188a902ab	0x681fbaa1703c2e1feefd38bafc475bd650859bc4	0x028fb5025e2b339ef8acd90096070790b7716ab3	0	0x095ea7b30000000000000000000000001111111254eeb25477b68fb85ed929f73a960582ffffffffffffffffffffffffffffffffffffffffffffffffffffffffffffffff	16112855	0x06ebb5b049957c6837a12acafe7e3f021be457c939664bba2188ad54f1abb88f
34377	0x0fcd1bb0c5080da8c97c557697670f0dcd78d6701ac8327289054831547691a5	0xec611ac556b84557a84d3e45c639ce3c2b017f7c	0x777450d62cd0d651906ed894e490f2888e9eef59	0	0x8ab53447	16112855	0x06ebb5b049957c6837a12acafe7e3f021be457c939664bba2188ad54f1abb88f
34379	0x08580907da657a17a0c8e72b92f5ec4b9b03a39b4f24929cb9fea8e4a6dfd7a2	0x3a7a1c811d3bb561181fa771006832fadcd01019	0x5a98fcbea516cf06857215779fd812ca3bef1b32	0	0x095ea7b3000000000000000000000000617dee16b86534a5d792a4d7a62fb491b544111effffffffffffffffffffffffffffffffffffffffffffffffffffffffffffffff	16112855	0x06ebb5b049957c6837a12acafe7e3f021be457c939664bba2188ad54f1abb88f
34380	0xaed6eeb4ecd1533bcfaad4a529d97c59b364c88907de103db92eadb8d108a739	0xf45db938bdc83a3060e1bd629767eb0e96e3884b	0x150f94b44927f078737562f0fcf3c95c01cc2376	5.11e+17	0x1114cd2a000000000000000000000000000000000000000000000000000000000000006e000000000000000000000000f45db938bdc83a3060e1bd629767eb0e96e3884b00000000000000000000000000000000000000000000000000000000000000a00000000000000000000000000000000000000000000000000713e24c43730000000000000000000000000000000000000000000000000000070ad3161f45a0000000000000000000000000000000000000000000000000000000000000000014f45db…	16112855	0x06ebb5b049957c6837a12acafe7e3f021be457c939664bba2188ad54f1abb88f
34382	0x420a4520d17a8e9e1f496bed44111340410ea61a5a4f257c44db0775a5180fbf	0x41d23d1d53aeccaebbe27093884bc07061581c10	0xa0b86991c6218b36c1d19d4a2e9eb0ce3606eb48	0	0xa9059cbb000000000000000000000000a4cd735c827327e16d259e37957925fc6e69f401000000000000000000000000000000000000000000000000000000000cab46c5	16112855	0x06ebb5b049957c6837a12acafe7e3f021be457c939664bba2188ad54f1abb88f
34383	0x57a8b46eb72392c636e443824cbc586c57b861f962e9a7456102e3f4edf7affb	0x47f013d7c9015d85f271fe5afc294cbc99143f8a	0x7a250d5630b4cf539739df2c5dacb4c659f2488d	5e+16	0x7ff36ab5000000000000000000000000000000000000000000000000000002a812618baf000000000000000000000000000000000000000000000000000000000000008000000000000000000000000047f013d7c9015d85f271fe5afc294cbc99143f8a00000000000000000000000000000000000000000000000000000000638cd5240000000000000000000000000000000000000000000000000000000000000002000000000000000000000000c02aaa39b223fe8d0a0e5c4f27ead9083c756cc200000…	16112855	0x06ebb5b049957c6837a12acafe7e3f021be457c939664bba2188ad54f1abb88f
34384	0xc1e00b9137ea9d74ebc116147cae38d8ea16f7f13585d6da46d5ba60e40e5120	0x1be210e7990eff6c07cb8cadcb9d077063ac3614	0xa360bc9261e7b841f0b3983bbc4e4fee172866af	2100000000000000	0x	16112855	0x06ebb5b049957c6837a12acafe7e3f021be457c939664bba2188ad54f1abb88f
34385	0x8fc1ce28c1769101f947d774a22487725366e34cea74e383ab535e72ca006066	0x6dec4b6c66fdb0df742e05f7f277ed7232596c71	0xb7ab762d27959802aabfb0ddd8d45df0817242ed	0	0x42842e0e0000000000000000000000006dec4b6c66fdb0df742e05f7f277ed7232596c71000000000000000000000000957f8e6ad17233f57a06d1bc42f17f606121b42b0000000000000000000000000000000000000000000000000000000000000b0c	16112855	0x06ebb5b049957c6837a12acafe7e3f021be457c939664bba2188ad54f1abb88f
34386	0xad7daae62266d50d3b8942de5f3f84bb052e0d7211381dd276bb85a975a3795f	0x153ea71a8c6cb89159d3995c543ce1345a35cc61	0x941d936f42a8ceeeb7968be8d9b6ae29bac5fbb8	0	0xa22cb4650000000000000000000000001e0049783f008a0085193e00003d00cd54003c710000000000000000000000000000000000000000000000000000000000000001	16112855	0x06ebb5b049957c6837a12acafe7e3f021be457c939664bba2188ad54f1abb88f
34387	0xb1055f9668742c0761174bd587594fa27b853e3281806bc674e93a2e9dcb61fe	0x1be210e7990eff6c07cb8cadcb9d077063ac3614	0x16ff581665c0e972a045139bfad53d40acb38479	2100000000000000	0x	16112855	0x06ebb5b049957c6837a12acafe7e3f021be457c939664bba2188ad54f1abb88f
34388	0x594dfeeec28aa92beaf36a368f31fd4569386adfb41711ccd3d1a346fb0c497b	0x4c660ead9d1bc5f7cc52b4df80f0010d15cf7d3f	0x59728544b08ab483533076417fbbb2fd0b17ce3a	0	0xcbd2ec650000000000000000000000000000000000000000000000000000000000003bdc	16112855	0x06ebb5b049957c6837a12acafe7e3f021be457c939664bba2188ad54f1abb88f
34389	0xe73c801dea80c77876d8b412101befacf4f29e649613e395cb7be9c4d529f6fd	0x3aff86656a65f3d81b3e0b4c4f8d4199f3b3fbde	0x0f5d2fb29fb7d3cfee444a200298f468908cc942	0	0xa9059cbb0000000000000000000000001c17622cfa9b6fd2043a76dfc39a5b5a109aa7080000000000000000000000000000000000000000000006488ee111826e620000	16112855	0x06ebb5b049957c6837a12acafe7e3f021be457c939664bba2188ad54f1abb88f
34391	0x4b7eee01bdcb8ebf167a2b4f80e54ee50401843f56153c08fc0c811a66abc65f	0x3abf6dd188826b9497c2c794cfccb469a311d080	0x7a250d5630b4cf539739df2c5dacb4c659f2488d	0	0x5b0d5984000000000000000000000000e9b2fa8832ae54bf7278845d64fdeba68a424aaa0000000000000000000000000000000000000000000000000b66da25695884ca000000000000000000000000000000000000000000000000091785630b04d2a50000000000000000000000000000000000000000000000000bc4a1dfdf078cc30000000000000000000000003abf6dd188826b9497c2c794cfccb469a311d08000000000000000000000000000000000000000000000000000000000638cdd9700000…	16112855	0x06ebb5b049957c6837a12acafe7e3f021be457c939664bba2188ad54f1abb88f
34392	0x37088a4be4350fad8d6a1048d8064c385c8cf5d94fd1836fb561a0a595102535	0x30569d63c10e0d9c06971412ae794684169a26e2	0x68b3465833fb72a70ecdf485e0e4c7bd8665fc45	0	0x5ae401dc00000000000000000000000000000000000000000000000000000000638cdbff00000000000000000000000000000000000000000000000000000000000000400000000000000000000000000000000000000000000000000000000000000001000000000000000000000000000000000000000000000000000000000000002000000000000000000000000000000000000000000000000000000000000000e4472b43f3000000000000000000000000000000000000000000000010161971fd8b25e…	16112855	0x06ebb5b049957c6837a12acafe7e3f021be457c939664bba2188ad54f1abb88f
34393	0xb53fced64e67a1bc7b796fccdd369c5a3cd5527910b9b738901d64a3a91b8a7d	0xe5a43b3d9c408ee7da43dca881d41912f885abb2	0x1ea48b9965bb5086f3b468e50ed93888a661fc17	0	0x095ea7b30000000000000000000000008bc3702c35d33e5df7cb0f06cb72a0c34ae0c56f00000000000000000000000000000000000000000000000094e89e2667f10000	16112855	0x06ebb5b049957c6837a12acafe7e3f021be457c939664bba2188ad54f1abb88f
34396	0xf049a19cdfacc45622b036b7e467f97fdc6ea0e1643475d3f07f0e40d05e8ed7	0x9bcc310757d03042e0217e05c4c2a31cf9b07c9d	0x172401c05a6f9d569d731f747d3bfd66b1c68e54	0	0x095ea7b30000000000000000000000007a250d5630b4cf539739df2c5dacb4c659f2488dffffffffffffffffffffffffffffffffffffffffffffffffffffffffffffffff	16112855	0x06ebb5b049957c6837a12acafe7e3f021be457c939664bba2188ad54f1abb88f
34398	0x439791f658c3c575c3cadd0a2d3308a6ef0f77d99f1138eaf829a17b33a5879f	0xa273fbbbcca36c652e5c244eea0877daeeb8e995	0x7492e30d60d96c58ed0f0dc2fe536098c620c4c0	0	0xefef39a10000000000000000000000000000000000000000000000000000000000000001	16112855	0x06ebb5b049957c6837a12acafe7e3f021be457c939664bba2188ad54f1abb88f
34399	0xac839301e9fba9518cbd6229a0b25e1eef6bef9a3d9d11c2ab5452a0d85a96ff	0x86ce119ccebcc254d62c335c97afe1ba2a697aef	0x00000000006c3852cbef3e08e8df289169ede581	0	0xe7acab24000000000000000000000000000000000000000000000000000000000000008000000000000000000000000000000000000000000000000000000000000006600000007b02230091a7ed01230072f7006a004d60a8d4e71d599b8104250f0000000000000000000000000000000000000000000000000000000000000000000000000000000000000000000000000000000000000000000000000000000000a0000000000000000000000000000000000000000000000000000000000000000100000…	16112855	0x06ebb5b049957c6837a12acafe7e3f021be457c939664bba2188ad54f1abb88f
34400	0x384bcb86de0c55e67875d087514095b607617cc4597fa548e50588b2b1f40fb2	0x49545c4cbf5a385845cb164b540b35c05a6f4c43	0x3845badade8e6dff049820680d1f14bd3903a5d0	0	0xa9059cbb0000000000000000000000005094564a8a7a3f3ca9dc9e3a6f929dda857332910000000000000000000000000000000000000000000004340ffb45e26d545000	16112855	0x06ebb5b049957c6837a12acafe7e3f021be457c939664bba2188ad54f1abb88f
34401	0x15f0a44e05bf217a21764fcd7a3e2ab9da8363a007f4618126cdab417b62d1d7	0x3b794929566e3ba0f25e4263e1987828b5c87161	0x6b5d419a6f8f55c77a9044b8b8e41d68b0029ead	2.18e+16	0x	16112855	0x06ebb5b049957c6837a12acafe7e3f021be457c939664bba2188ad54f1abb88f
34403	0xb4bf614d836d1dfb17a54b0771a2192df0303fb4397bd26e9325a6f667ad17a8	0xf2439241881964006369c0e2377d45f3740f48a0	0xeeeec6476073778077b40a73fe32e23a9876cab4	7.95e+16	0x2b66d72e000000000000000000000000000000000000000000000000000000000000002000000000000000000000000000000000000000000000000000000000000000ee65794a68624763694f694a46557a49314e694973496d74705a434936496a64684e6a526c5a6d51314c544a694e4463744e475a6a5a6931684f4463784c5445785a6d59354f5451345954646a4f434a392e436763784d6a55334c6a673445674e56553051614a446b315a4451324d7a557a4c57526a4d6a49744e4455774d4331684f4…	16112854	0xd61236fdbd6fef97cf690ea5a89f4ff5da7e8f6f320bde9a6d93247a9066d451
34404	0xf5600f48e3071fc11f295e04156ca5006061ad306d03d0ad1c343a58f0f7866c	0xd62ca385c107390062a5f1f404c78ba208717ce4	0x1111111254fb6c44bac0bed2854e76f90643097d	0	0x2e95b6c8000000000000000000000000a0b86991c6218b36c1d19d4a2e9eb0ce3606eb480000000000000000000000000000000000000000000000000000000023c2964c00000000000000000000000000000000000000000000002e33161d56e2d5e0b40000000000000000000000000000000000000000000000000000000000000080000000000000000000000000000000000000000000000000000000000000000180000000000000003b6d034005104ebba2b6d3b8254aa41cf6df80462f6160aecfee7…	16112854	0xd61236fdbd6fef97cf690ea5a89f4ff5da7e8f6f320bde9a6d93247a9066d451
34407	0x7e14c9c14e9f5a215c5d1c982ff6aceadd3dd36a46026f45efbe539def2b7e92	0xdafea492d9c6733ae3d56b7ed1adb60692c98bc5	0xebec795c9c8bbd61ffc14a6662944748f299cacf	2.35e+16	0x	16112854	0xd61236fdbd6fef97cf690ea5a89f4ff5da7e8f6f320bde9a6d93247a9066d451
34408	0xe7d2e0ff3cf8cca707f7072ce3aea4258d7cecccbe5e8f55afba6a7bb022a8d9	0xd35f84a9f82fbec2082b2b6c9afd20b4a8f7c959	0x33fd426905f149f8376e227d0c9d3340aad17af1	0	0xf242432a000000000000000000000000d35f84a9f82fbec2082b2b6c9afd20b4a8f7c959000000000000000000000000511c85042524a41bbf30e7a8533a84b8c5e55f430000000000000000000000000000000000000000000000000000000000000021000000000000000000000000000000000000000000000000000000000000000100000000000000000000000000000000000000000000000000000000000000a0000000000000000000000000000000000000000000000000000000000000000000000…	16112854	0xd61236fdbd6fef97cf690ea5a89f4ff5da7e8f6f320bde9a6d93247a9066d451
34409	0x5be4ef8e97d3fc1250a0086888eaf2069b62550b50215522b0ef5f03fff5bd63	0x9cd74f63f299926c3c009704959b50f4fbd0d06a	0xd152f549545093347a162dce210e7293f1452150	1.6e+16	0xe63d38ed000000000000000000000000000000000000000000000000000000000000004000000000000000000000000000000000000000000000000000000000000001a0000000000000000000000000000000000000000000000000000000000000000a000000000000000000000000b3fb4369d1079dc85c10ac6366b345925df71adb0000000000000000000000003d27144f0512a6cab88b80fd48ce197d2acff7730000000000000000000000007051d350214f5667b2b33dff5724d76f44510c9200000…	16112854	0xd61236fdbd6fef97cf690ea5a89f4ff5da7e8f6f320bde9a6d93247a9066d451
34410	0xd3206e2ecf681ea81a71e60bd9676b30a537697609b8afd3aa8846e628cb5c34	0x1be210e7990eff6c07cb8cadcb9d077063ac3614	0x0095bad244508af7988d930d273d517681d567f8	2100000000000000	0x	16112854	0xd61236fdbd6fef97cf690ea5a89f4ff5da7e8f6f320bde9a6d93247a9066d451
34412	0x527b8fdb1058ef7fc2226df96af36adb901e0a3ab854c007f7862244d824d278	0x1ce833da90e8ed544ca1b6686e52e5b90ae3095d	0xfc5b5e53e8256f6efe49df6e6b50aa8ea670d348	0	0x654cfdff0000000000000000000000000000000000000000070d2abef41773efe417c63c0000000000000000000000000000000000000000000000000000000000000001	16112854	0xd61236fdbd6fef97cf690ea5a89f4ff5da7e8f6f320bde9a6d93247a9066d451
34414	0x83fb68443de3b7cdd985635102f024907771fc679038589875ccea28852f4228	0xfeb1797e4f6fc613e556eb62724e29a08c5ca2d9	0x1c57ede6e2162253f0dd830e85957aae13d59176	0	0xa22cb46500000000000000000000000000000000000111abe46ff893f3b2fdf1f759a8a80000000000000000000000000000000000000000000000000000000000000001	16112854	0xd61236fdbd6fef97cf690ea5a89f4ff5da7e8f6f320bde9a6d93247a9066d451
34418	0x29b5ea130d10daeb1562f78592d4b3c46f471124b5274102466a441dce834ef4	0xa9831d89c4067bf7518efbcb6351ef6dd0059f33	0xa0b86991c6218b36c1d19d4a2e9eb0ce3606eb48	0	0x23b872dd000000000000000000000000c2e6de49e561a95cb829c48cf4bc20b384c8f2790000000000000000000000000dac5fe88dd2195fcba0e2fb489e5bafc4a070ba0000000000000000000000000000000000000000000000000000000000000000	16112854	0xd61236fdbd6fef97cf690ea5a89f4ff5da7e8f6f320bde9a6d93247a9066d451
34419	0x6c512d96dd4bb88fe20479f83cc8902bed7e52d985b904216d7e438a6876c156	0x018105920d307404ebaf61636cb61967d86a6ea3	0xc02aaa39b223fe8d0a0e5c4f27ead9083c756cc2	0	0x095ea7b30000000000000000000000001e0049783f008a0085193e00003d00cd54003c71ffffffffffffffffffffffffffffffffffffffffffffffffffffffffffffffff	16112854	0xd61236fdbd6fef97cf690ea5a89f4ff5da7e8f6f320bde9a6d93247a9066d451
34424	0xb507bbb0638a05e76184d29f3597633b26e209522ca16139483f84fda8864b02	0x0dc9abc00d57b22735587d182238c78d416df2d7	0x7492e30d60d96c58ed0f0dc2fe536098c620c4c0	0	0xefef39a10000000000000000000000000000000000000000000000000000000000000001	16112854	0xd61236fdbd6fef97cf690ea5a89f4ff5da7e8f6f320bde9a6d93247a9066d451
34426	0xf7b70cd1e889c10b51d7e60834ad7d51618dbca1e43241239818491dcac9afcd	0x8d483613e70d287e573351bcecef4bac15ce7c00	0x617dee16b86534a5d792a4d7a62fb491b544111e	2e+17	0xabcffc260000000000000000000000004fe5b965e3bd76eff36280471030ef9b0e6e2c1d0000000000000000000000000000000000000000000000000000000000000080000000000000000000000000000000000000000000000000000000000000020000000000000000000000000000000000000000000000000000000000000004e0000000000000000000000000eeeeeeeeeeeeeeeeeeeeeeeeeeeeeeeeeeeeeeee0000000000000000000000006a6aa13393b7d1100c00a57c76c39e8b6c83504100000…	16112854	0xd61236fdbd6fef97cf690ea5a89f4ff5da7e8f6f320bde9a6d93247a9066d451
34427	0x517c8f5d9e48bd81d995a8a1adb4429c35ac78b53cdc9fc65e805e7f488688bc	0x853be46ebc444fdc049a2911758faa152b1c3906	0x06450dee7fd2fb8e39061434babcfc05599a6fb8	0	0x9ff054df00000000000000000000000000000000000000000000000000000000000001af	16112854	0xd61236fdbd6fef97cf690ea5a89f4ff5da7e8f6f320bde9a6d93247a9066d451
34428	0x9e821d1051521ba9cc8095f5734e33110cde1da60ecd977bc18ceee5c5eae2a1	0xd915185860c732c991be071948e24a1d01f062f6	0x68b3465833fb72a70ecdf485e0e4c7bd8665fc45	4.48e+16	0x5ae401dc00000000000000000000000000000000000000000000000000000000638cdbe7000000000000000000000000000000000000000000000000000000000000004000000000000000000000000000000000000000000000000000000000000000020000000000000000000000000000000000000000000000000000000000000040000000000000000000000000000000000000000000000000000000000000016000000000000000000000000000000000000000000000000000000000000000e45023b…	16112854	0xd61236fdbd6fef97cf690ea5a89f4ff5da7e8f6f320bde9a6d93247a9066d451
34429	0x6c1fa5fc287d0c52ace6ff8b4f5259fb78a08990743dfd3afc6265d513f9e900	0x2cea3a8aa881b0467ee8520d8d7b551b3ce09128	0xc4448b71118c9071bcb9734a0eac55d18a153949	2.5e+16	0x439370b1	16112854	0xd61236fdbd6fef97cf690ea5a89f4ff5da7e8f6f320bde9a6d93247a9066d451
34430	0x018ac6239ccfbd617eb01755a56fa023d864fb73ded8987782d43416767b1231	0x3feea8d80c68f9e08b60bc6f431bd6490e2ca7af	0xdac17f958d2ee523a2206206994597c13d831ec7	0	0x23b872dd000000000000000000000000ecc1219ed350bfa65c657935670fe742fdbb5554000000000000000000000000473e484969175a47c32b48e1ae9902e487bf3f340000000000000000000000000000000000000000000000000000000000000000	16112854	0xd61236fdbd6fef97cf690ea5a89f4ff5da7e8f6f320bde9a6d93247a9066d451
34431	0xfba47b89e7d5d74d47bbd80da66ae03a86f1e2b448f900bfefd1c62660693ce3	0x1be210e7990eff6c07cb8cadcb9d077063ac3614	0x2a3924c769ae65f0c07046c67eef9c46bad11231	2100000000000000	0x	16112854	0xd61236fdbd6fef97cf690ea5a89f4ff5da7e8f6f320bde9a6d93247a9066d451
34432	0x0591f0ec5a77fb184e560a0c917c3ed1684de879f1022f22636648165e2e6621	0x2f5fc65b9c6d1fee8ba4ca23fb2d7c363c95133c	0x0b17cbf93a6bc286a2760ad206b03d4e42997382	0	0xa22cb4650000000000000000000000001e0049783f008a0085193e00003d00cd54003c710000000000000000000000000000000000000000000000000000000000000001	16112854	0xd61236fdbd6fef97cf690ea5a89f4ff5da7e8f6f320bde9a6d93247a9066d451
34433	0x75698a8b2048b49e30866423d62377c150be950c2deb763e84318c9000f7d635	0x55fc2a86d36dd2a6c6bea4b34cdacf004bcff826	0x68b3465833fb72a70ecdf485e0e4c7bd8665fc45	6.9e+16	0x5ae401dc00000000000000000000000000000000000000000000000000000000638cdbdb00000000000000000000000000000000000000000000000000000000000000400000000000000000000000000000000000000000000000000000000000000001000000000000000000000000000000000000000000000000000000000000002000000000000000000000000000000000000000000000000000000000000000e404e45aaf000000000000000000000000c02aaa39b223fe8d0a0e5c4f27ead9083c756…	16112854	0xd61236fdbd6fef97cf690ea5a89f4ff5da7e8f6f320bde9a6d93247a9066d451
34435	0x36bdc27c01cbdc84de0adc7e701ffe65ba0205408a798689cf4704f160bcfe41	0x3944610aeaf170c7eea9db92be195a63dfa21f5f	0x21ae791a447c7eec28c40bba0b297b00d7d0e8f4	0	0xf242432a0000000000000000000000003944610aeaf170c7eea9db92be195a63dfa21f5f000000000000000000000000605110c34a93179dbcc090c09036728f5b7c7bb4d29feb6601d759c4407d88d2911a46bc173eecb6000000000000000000000001000000000000000000000000000000000000000000000000000000000000000b00000000000000000000000000000000000000000000000000000000000000a0000000000000000000000000000000000000000000000000000000000000000000000…	16112854	0xd61236fdbd6fef97cf690ea5a89f4ff5da7e8f6f320bde9a6d93247a9066d451
34436	0x4e10d6a3bf78f3e97f7c377879589bb3464e239b4553550a1e53927673788b6a	0x87eb90939dc2f6f9fecbe2688456668b5edbd338	0x68b3465833fb72a70ecdf485e0e4c7bd8665fc45	3.9e+17	0x5ae401dc00000000000000000000000000000000000000000000000000000000638cdbe700000000000000000000000000000000000000000000000000000000000000400000000000000000000000000000000000000000000000000000000000000001000000000000000000000000000000000000000000000000000000000000002000000000000000000000000000000000000000000000000000000000000000e4472b43f300000000000000000000000000000000000000000000000005698eef06670…	16112854	0xd61236fdbd6fef97cf690ea5a89f4ff5da7e8f6f320bde9a6d93247a9066d451
34438	0xe672e02ed5caaece4083d4f1ac772482c533bdbbb4000d6b29b7b3d7d1b4545e	0x22eaa950e2b1a19cd3bf9d4b8b22c87f1c031bb5	0x000000000000ad05ccc4f10045630fb830b95127	1.31e+18	0x9a1fc3a70000000000000000000000000000000000000000000000000000000000000040000000000000000000000000000000000000000000000000000000000000038000000000000000000000000000000000000000000000000000000000000000e0000000000000000000000000000000000000000000000000000000000000001b531b4e3fc88f38a6a40f24b5d108a045fdb95c01cc4194b756c03ab3fc847ab3247bf50195c950f37da68b956cfbf306dbff09d84f1f2a3866eaaf6af9e3282e00000…	16112854	0xd61236fdbd6fef97cf690ea5a89f4ff5da7e8f6f320bde9a6d93247a9066d451
34439	0x5bbf71f6899730d6e983bfa21ba530cc5580b52c08357ebb0b9c832a46492ae5	0x28c6c06298d514db089934071355e5743bf21d60	0xdac17f958d2ee523a2206206994597c13d831ec7	0	0xa9059cbb00000000000000000000000056d04073350374a1ab2a491585c5db55488322c90000000000000000000000000000000000000000000000000000000018300440	16112854	0xd61236fdbd6fef97cf690ea5a89f4ff5da7e8f6f320bde9a6d93247a9066d451
34441	0x018c7b36cae1cdce3c90bb9fab62fb33d6c9baf52e4d7710ad4bd051fc02c9e4	0x47bc4b286e8186f8e9f155da7136a050444849c9	0xdac17f958d2ee523a2206206994597c13d831ec7	0	0x095ea7b30000000000000000000000001180c114f7fadcb6957670432a3cf8ef08ab53540000000000000000000000000000000000000000000000000000000000000000	16112854	0xd61236fdbd6fef97cf690ea5a89f4ff5da7e8f6f320bde9a6d93247a9066d451
34442	0xa73d03937a66f1473847aa30b130614f2cc48e3ffb7c8aac9e28202137948088	0xe5c47645c7ce98a967863e6943eaa4c919b91f03	0x68b3465833fb72a70ecdf485e0e4c7bd8665fc45	4e+16	0x5ae401dc00000000000000000000000000000000000000000000000000000000638cdbf300000000000000000000000000000000000000000000000000000000000000400000000000000000000000000000000000000000000000000000000000000001000000000000000000000000000000000000000000000000000000000000002000000000000000000000000000000000000000000000000000000000000000e4472b43f3000000000000000000000000000000000000000000000000008e1bc9bf040…	16112854	0xd61236fdbd6fef97cf690ea5a89f4ff5da7e8f6f320bde9a6d93247a9066d451
34443	0xb5fa77284dc8076c4518a136d8277b1f4e036ca3ce0c1a63be16ff5d66e1d120	0xf16e9b0d03470827a95cdfd0cb8a8a3b46969b91	0x514910771af9ca656af840dff83e8264ecf986ca	0	0xa9059cbb00000000000000000000000006e25ab2a68bb8d9380508d100e01b54cb76ee6600000000000000000000000000000000000000000000000572aaef58e5910000	16112854	0xd61236fdbd6fef97cf690ea5a89f4ff5da7e8f6f320bde9a6d93247a9066d451
34444	0x312151ad67618f5ec35b5ba12c6443afdbf43c0d9083a3ce9f19d3cbd66558fa	0x1be210e7990eff6c07cb8cadcb9d077063ac3614	0xf8005b74ec4d42555041bab67472ae96dde3bde9	2100000000000000	0x	16112854	0xd61236fdbd6fef97cf690ea5a89f4ff5da7e8f6f320bde9a6d93247a9066d451
34446	0x6a75ab377bda1c7b1235b4d9f22912eda60e752d85f9a6a4202f4267455e03de	0x3d67f4ea34f70ad862ee64310e99b3cdaab41ef3	0x3819f64f282bf135d62168c1e513280daf905e06	0	0xf812b9a4000000000000000000000000000000000000000000000000000000000000000a000000000000000000000000000000000000000000000000000000000005f00a	16112854	0xd61236fdbd6fef97cf690ea5a89f4ff5da7e8f6f320bde9a6d93247a9066d451
34447	0xfce876d28951670d84a8c19f7ca0a65a8c9544f71b8b9e81d56619ee5fa7d76a	0x1be210e7990eff6c07cb8cadcb9d077063ac3614	0x98e6cab4407788711ae51ece3c7242d5b5d38f73	2100000000000000	0x	16112854	0xd61236fdbd6fef97cf690ea5a89f4ff5da7e8f6f320bde9a6d93247a9066d451
34448	0x716db04b72a5dc71c3c85c20277a5e8bfd75801d3d08fbd66c858b3b65d7a0e7	0xc337e5b06b0ca53efd0d1c400ad0bac2450f10cb	0x312bea6d7f1bd57dcc3fb0946796c8e5ef4e452f	2000000000000000	0x	16112854	0xd61236fdbd6fef97cf690ea5a89f4ff5da7e8f6f320bde9a6d93247a9066d451
34449	0xe49b14767aab9f5652f88da699785cb5135036a59290f96dcadb9f03ac187bf2	0xa21740833858985e4d801533a808786d3647fb83	0x9008d19f58aabd9ed0d60971565aa8510560ab41	0	0x13d79a0b000000000000000000000000000000000000000000000000000000000000008000000000000000000000000000000000000000000000000000000000000000e0000000000000000000000000000000000000000000000000000000000000014000000000000000000000000000000000000000000000000000000000000003600000000000000000000000000000000000000000000000000000000000000002000000000000000000000000a0b86991c6218b36c1d19d4a2e9eb0ce3606eb4800000…	16112854	0xd61236fdbd6fef97cf690ea5a89f4ff5da7e8f6f320bde9a6d93247a9066d451
34450	0xbacf3c02f71d12e6d4d4d096c4e3b52bdd607e2791714f33b80971e9f4c74e96	0xf16e9b0d03470827a95cdfd0cb8a8a3b46969b91	0x4a220e6096b25eadb88358cb44068a3248254675	0	0xa9059cbb000000000000000000000000ae98aa4ef33e5eabcb9e148c9601394583b8b6440000000000000000000000000000000000000000000000008a499664c03c3400	16112854	0xd61236fdbd6fef97cf690ea5a89f4ff5da7e8f6f320bde9a6d93247a9066d451
34451	0x938197d83e4c2a5fb941212f330e14fd4da853054b33c128be585e80aa950e80	0x0acf1b98ae3a2084b729797116b0f5ad8d86a3ee	0x9ea307dc460230e77865206326bad338a3187b9b	0	0x095ea7b300000000000000000000000068b3465833fb72a70ecdf485e0e4c7bd8665fc45ffffffffffffffffffffffffffffffffffffffffffffffffffffffffffffffff	16112854	0xd61236fdbd6fef97cf690ea5a89f4ff5da7e8f6f320bde9a6d93247a9066d451
34453	0x0681c32ada8a974e98d77d8d212bc69c0ec9d53e7dc72cff0f61827a7e4b8473	0x56eddb7aa87536c09ccc2793473599fd21a8b17f	0xe0d9ec502e9960a1c289f9abaf41cacc3a7ae4cd	9890000000000000	0x	16112854	0xd61236fdbd6fef97cf690ea5a89f4ff5da7e8f6f320bde9a6d93247a9066d451
34454	0xeca73ae5fd969cb61c119575077bb2e9c4de0bcda60ab1f45da06e24a1f27675	0x1be210e7990eff6c07cb8cadcb9d077063ac3614	0xbafc13f198ddb6c92be66cf7d44c4a2de3fae254	2100000000000000	0x	16112854	0xd61236fdbd6fef97cf690ea5a89f4ff5da7e8f6f320bde9a6d93247a9066d451
34455	0xb083f1f6a52e77d36fc84583f3a4edc1a740985c2f1fa5441fedf109cdc2e15c	0xb0565c21576d89b22bb67724a37284c0b69b6fb2	0xa695a3c52773cef134521fdcb3534648b090a481	250000000000000	0x	16112854	0xd61236fdbd6fef97cf690ea5a89f4ff5da7e8f6f320bde9a6d93247a9066d451
34457	0x92286167fc389d1334ea8bee7cc21955a485e4523453065f8e93dbb26bf29313	0x63ede205d69eebb50a8c51749ffc57843dd28941	0x283af0b28c62c092c9727f1ee09c02ca627eb7f5	4370000000000000	0xf7a1696300000000000000000000000000000000000000000000000000000000000000c000000000000000000000000063ede205d69eebb50a8c51749ffc57843dd289410000000000000000000000000000000000000000000000000000000001e18558c60482a903b5e5c13f437a7065fa2f98e8b5e0ea337489741891ef08a011b61b0000000000000000000000004976fb03c32e5b8cfe2b6ccb31c09ba78ebaba4100000000000000000000000063ede205d69eebb50a8c51749ffc57843dd2894100000…	16112854	0xd61236fdbd6fef97cf690ea5a89f4ff5da7e8f6f320bde9a6d93247a9066d451
34460	0xc506fd3843cf9a807feb41472949277ac234f66d373ce88fcc87c4be117e04af	0x23f4569002a5a07f0ecf688142eeb6bcd883eef8	0xdac17f958d2ee523a2206206994597c13d831ec7	0	0xa9059cbb00000000000000000000000019093eb35305b8f1eec9cc0b1187cd9ac848acba00000000000000000000000000000000000000000000000000000000b7f6fe5c	16112854	0xd61236fdbd6fef97cf690ea5a89f4ff5da7e8f6f320bde9a6d93247a9066d451
34461	0x9334cdeba7936c4f2ea05245a6926466ab0377f80dcccdf38fa5b01b5eaff632	0xfbb1b73c4f0bda4f67dca266ce6ef42f520fbb98	0x95ad61b0a150d79219dcf64e1e6cc01f0b64c4ce	0	0xa9059cbb00000000000000000000000052039ac3a5444db42a0d8e8b6a8798540414920c00000000000000000000000000000000000000000000c0b9c8ae99707767d400	16112854	0xd61236fdbd6fef97cf690ea5a89f4ff5da7e8f6f320bde9a6d93247a9066d451
34462	0xbe99bdb06a58884a58fb942d3a3a6aa1a84594b626e9d7a8545f35dc4b49cdd4	0x963737c550e70ffe4d59464542a28604edb2ef9a	0x065928974588c7aed5805f296b4f97bbf44c93ab	2.9e+17	0x	16112854	0xd61236fdbd6fef97cf690ea5a89f4ff5da7e8f6f320bde9a6d93247a9066d451
34463	0xdd409c17a18142eb6230b2814dcd1b42fb0d926e3be31336fb6ca2da405f16dc	0x1be210e7990eff6c07cb8cadcb9d077063ac3614	0x08c1674a50f0c568f90707d29275e9ef3fa0cbdb	2100000000000000	0x	16112854	0xd61236fdbd6fef97cf690ea5a89f4ff5da7e8f6f320bde9a6d93247a9066d451
34465	0x04432ae8c6169523ac25043e5261cf9964446e6ec4a5375ab3f22c7192adf4a2	0x6f867b07b867a277cc06d222b3a26958555578a5	0x1b79c7832ed9358e024f9e46e9c8b6f56633691b	0	0x42842e0e0000000000000000000000006f867b07b867a277cc06d222b3a26958555578a50000000000000000000000001524b7b7189708fc6c725325238c1179a3d5fe4e000000000000000000000000000000000000000000000000000000000000050b360c6ebe	16112854	0xd61236fdbd6fef97cf690ea5a89f4ff5da7e8f6f320bde9a6d93247a9066d451
34466	0xee278f509352512af21290b37db98449f5f43f7802732bce43c596acf388b066	0x7563758243a262e96880f178aee7817dcf47ab0f	0xdac17f958d2ee523a2206206994597c13d831ec7	0	0xa9059cbb000000000000000000000000840d40b12b2320baeb19267817211df9b949887100000000000000000000000000000000000000000000000000000000014fb180	16112854	0xd61236fdbd6fef97cf690ea5a89f4ff5da7e8f6f320bde9a6d93247a9066d451
34468	0xfd854ed212e3d71c9421d81526cd05c2f49a7bd5f7dda4b3bd6ae1af495441d3	0x830bcfdadfdd9acfdff494f4e21b0d01557473c7	0x00000000006c3852cbef3e08e8df289169ede581	0	0xfd9f1e1000000000000000000000000000000000000000000000000000000000000000200000000000000000000000000000000000000000000000000000000000000002000000000000000000000000000000000000000000000000000000000000004000000000000000000000000000000000000000000000000000000000000004c0000000000000000000000000830bcfdadfdd9acfdff494f4e21b0d01557473c7000000000000000000000000004c00500000ad104d7dbd00e3ae0a5c00560c0000000…	16112854	0xd61236fdbd6fef97cf690ea5a89f4ff5da7e8f6f320bde9a6d93247a9066d451
34471	0x4df5db82dad2a6ce5eebe2508fd5c2030ab9f5505ef948a0ba57cf0f467a5979	0xd026da4910b0f5a018b5d32cf654a6bb81c421a0	0x3f1d193884fd596e2b2110759f314118af410ced	0	0x23b872dd000000000000000000000000d026da4910b0f5a018b5d32cf654a6bb81c421a0000000000000000000000000107608a8b7a1af418f9aaa608fb92651c122e7c6000000000000000000000000000000000000000000000000000000000000050a	16112854	0xd61236fdbd6fef97cf690ea5a89f4ff5da7e8f6f320bde9a6d93247a9066d451
34472	0xc8877e17f4797b96e3b7e2e95e32b99affe4846c35376d2977294efe43c18413	0xdfd5293d8e347dfe59e90efd55b2956a1343963d	0xb5afd2e3dcf884d48ad4a50b0ce4d975fde99542	6.99e+17	0x	16112854	0xd61236fdbd6fef97cf690ea5a89f4ff5da7e8f6f320bde9a6d93247a9066d451
34473	0x66ad6ecc29ca2139a49ccb31117062c3d23ada0cc7cb3fe934debba8c1890e1f	0x19f494583c7c933be7b0ee58104ddafac1e8adfa	0xdbd324b73f6f85bf9013b75c442021303b635ff9	4.77e+16	0xa9059cbb000000000000000000000000926a8fb66503c2fac4821bef2bdece1b8e077e44000000000000000000000000000000002ba9f1900c1ea39132fd1cc44783bc51	16112854	0xd61236fdbd6fef97cf690ea5a89f4ff5da7e8f6f320bde9a6d93247a9066d451
34475	0xd2d040ab3e458eae0306f59539700d3b1b0b7910bb8a67cf2085e69a8acb0453	0xf16e9b0d03470827a95cdfd0cb8a8a3b46969b91	0x329cf160f30d21006bcd24b67eade561e54cde4c	0	0xa9059cbb0000000000000000000000002fee1c3e1985ecadd37c3667f3185542386a6c4d00000000000000000000000000000000000000000000023c3094f2dc3ef1c000	16112854	0xd61236fdbd6fef97cf690ea5a89f4ff5da7e8f6f320bde9a6d93247a9066d451
34476	0xc9359f16b4fa74cc616a31f49b8becdf3cf47a7455432aea39dc64868d12bfe6	0x5fb1b08d6b6c5430bd8163b93f312d7ab4f17d16	0xbca54d4d3556fe75fdf64b9c30241ec482b9fd02	1590000000000000	0x	16112854	0xd61236fdbd6fef97cf690ea5a89f4ff5da7e8f6f320bde9a6d93247a9066d451
34477	0x2a267d24d968f3370bb81f1a1e2cc385dcd1eae0a6d05db0d636f557a845ef0a	0x4d3ff69bdcadf0468c8564339c56f34aa4c3c0ba	0xc39a42b6fd46bda58ddbfcf7aa46ad6d0a7246ac	0	0x	16112854	0xd61236fdbd6fef97cf690ea5a89f4ff5da7e8f6f320bde9a6d93247a9066d451
34478	0xeb97f2926b28406b9acc7cbfe8d20fde1e983e44fb6a19c60c8eab69b6da0c7f	0xa4e5961b58dbe487639929643dcb1dc3848daf5e	0x5bd7110813f9d8b9644033cd205a54bf5cc668ae	1240000000000000	0x	16112854	0xd61236fdbd6fef97cf690ea5a89f4ff5da7e8f6f320bde9a6d93247a9066d451
34479	0x9ed0fb385be56b5114112d1a26925d908e87588482b4299c68a5e874281557d2	0x3137e2a63eb146c139f5f00c6568e2fb46655343	0x00000000006c3852cbef3e08e8df289169ede581	0	0xfd9f1e100000000000000000000000000000000000000000000000000000000000000020000000000000000000000000000000000000000000000000000000000000000100000000000000000000000000000000000000000000000000000000000000200000000000000000000000003137e2a63eb146c139f5f00c6568e2fb46655343000000000000000000000000004c00500000ad104d7dbd00e3ae0a5c00560c00000000000000000000000000000000000000000000000000000000000000016000000…	16112854	0xd61236fdbd6fef97cf690ea5a89f4ff5da7e8f6f320bde9a6d93247a9066d451
34480	0x72f26bd09723ce7f660d576bd77f901564230f34faf7d7f0e814516b51739e43	0xc61db8593bc0e7ca3cba6df6581abe77548d75c8	0xeeeeeb57642040be42185f49c52f7e9b38f8eeee	0	0x095ea7b3000000000000000000000000b5e9f6c58f548cee53257304e287b23757effca1ffffffffffffffffffffffffffffffffffffffffffffffffffffffffffffffff	16112854	0xd61236fdbd6fef97cf690ea5a89f4ff5da7e8f6f320bde9a6d93247a9066d451
34481	0x4bc91b572b0508b55473ab0377defe0848d021a26fed16d16a30a1e52e53b148	0x1be210e7990eff6c07cb8cadcb9d077063ac3614	0x91144add2d6dccca140195266c47facd97894082	2100000000000000	0x	16112854	0xd61236fdbd6fef97cf690ea5a89f4ff5da7e8f6f320bde9a6d93247a9066d451
34482	0x047811a244aeb3cfdeed3120e65af9a60c4cbaf1ced23e9d3bcf2f6897c06cfe	0x10273412024421e0a61c994e5d40ad9310a33d29	0xff1f2b4adb9df6fc8eafecdcbf96a2b351680455	2e+17	0x7ff48afb000000000000000000000000000000000000000000000000000000000000000000000000000000000000000000000000000000000000000002c789994f9d800000000000000000000000000010273412024421e0a61c994e5d40ad9310a33d290000000000000000000000000000000000000000000000000000000000000000	16112854	0xd61236fdbd6fef97cf690ea5a89f4ff5da7e8f6f320bde9a6d93247a9066d451
34483	0xccbe052cb1ac88f8723510489db900df6a4c75357f3a4f8f862cd08cc26329a1	0x832f166799a407275500430b61b622f0058f15d6	0xaa55eff252336e310edb0b9df91b81636220462a	3200000000000000	0x	16112854	0xd61236fdbd6fef97cf690ea5a89f4ff5da7e8f6f320bde9a6d93247a9066d451
34484	0x69f40c84f25e1cf6809dd37ef53390357e3af6b306d2950cd1679633be209e5e	0x4e80744fa23cec76e1621ce0dfaceb4b1d532e12	0xcb9a0a1c13a47b36f1244d6ab3f1ed78d40d1e78	3.94e+16	0x	16112854	0xd61236fdbd6fef97cf690ea5a89f4ff5da7e8f6f320bde9a6d93247a9066d451
34485	0x193d9aace0bc7f815e795f39841e03fbf080057f400138b20aab029e5c5bcea1	0x710bda329b2a6224e4b44833de30f38e7f81d564	0xb8901acb165ed027e32754e0ffe830802919727f	0	0x23c452cd0000000000000000000000007a5d1a19151390fc136cb8d387b9bc7974665d5600000000000000000000000000000000000000000000000000354042f41ab9831445bf3892991e63574e5406c479878dca695048b126b0b18642d2d6136c02850000000000000000000000000000000000000000000000000006774c010e4cab	16112854	0xd61236fdbd6fef97cf690ea5a89f4ff5da7e8f6f320bde9a6d93247a9066d451
34486	0xe91a770de565c99c02c30a6e34e8e4b7d9f7ceaa246d3799b09dd34be135f116	0x062842bbc48e3d1db91d584262bc4167e56da5a8	0x7492e30d60d96c58ed0f0dc2fe536098c620c4c0	0	0x23b872dd000000000000000000000000062842bbc48e3d1db91d584262bc4167e56da5a80000000000000000000000006e771829752e213570572e0e2dbd5c82e3fe5a23000000000000000000000000000000000000000000000000000000000000ddc8	16112854	0xd61236fdbd6fef97cf690ea5a89f4ff5da7e8f6f320bde9a6d93247a9066d451
34487	0x6561d8a27f4d79e49b5e37fa0e7cb077ac5e45992fc2a7012037ed1dcba13b49	0xec78b484a28a73f4f1cff23b9cd31aa12c1d9b4e	0x15d4c048f83bd7e37d49ea4c83a07267ec4203da	0	0x7fd30df00000000000000000000000000000000000000000000000000000000000000040000000000000000000000000000000000000000000000000000000000000008000000000000000000000000000000000000000000000000000000000000000010000000000000000000000001bba1b741293130736387bf1ab08b9d4f378b16900000000000000000000000000000000000000000000000000000000000000010000000000000000000000000000000000000000000000000000003d59d2eb00	16112854	0xd61236fdbd6fef97cf690ea5a89f4ff5da7e8f6f320bde9a6d93247a9066d451
34488	0xd8d7dfb8ca9e9eebd548247cf4f81dd29e0b8c7dd426f7ba7a3bd4289dd6f66a	0xa46733e3658d3e04ddaf3bacd4dbe65ea37437d3	0x168dff66d831f1c55341efd3b289e56d70dfade4	2940000000000000	0x	16112854	0xd61236fdbd6fef97cf690ea5a89f4ff5da7e8f6f320bde9a6d93247a9066d451
34489	0x0609d04410b8b60ac54c6da75cac73e759589b1ce5ece960b9642712151fb80f	0x28c6c06298d514db089934071355e5743bf21d60	0xe2cc2672df889c5fe2caf58c5b22741e48ed4614	7.27e+16	0x	16112854	0xd61236fdbd6fef97cf690ea5a89f4ff5da7e8f6f320bde9a6d93247a9066d451
34492	0xae1746a75e854022fa45c941f93ffc916ef0fe657582bc94b2ff15ed63d80794	0xeb923247fe32e2dd4edc3833a0349430e314d64b	0xc02aaa39b223fe8d0a0e5c4f27ead9083c756cc2	1.1e+17	0xd0e30db0	16112854	0xd61236fdbd6fef97cf690ea5a89f4ff5da7e8f6f320bde9a6d93247a9066d451
34495	0x4ea0114371441bbe6a6b7360f816e0a38e9f5dabf4ccd26d7dc38c373ecb665a	0xc3b32b4658d6ac5e6d648ad95824a5ce24739b27	0x926dd086e4b9bdc80a37f366d11169db9fadd8bf	3.6e+16	0x	16112854	0xd61236fdbd6fef97cf690ea5a89f4ff5da7e8f6f320bde9a6d93247a9066d451
34496	0x9fb55a431ea4271b6d62b2ae6590911d4cf3b8d27cae239894137df71aa2082a	0xbf6727d4af6d3ff79c63bb780a36172ee6788e22	0xcbd6832ebc203e49e2b771897067fce3c58575ac	7.99e+16	0x	16112854	0xd61236fdbd6fef97cf690ea5a89f4ff5da7e8f6f320bde9a6d93247a9066d451
34502	0x3de3e2fad56530c50eb082f09c3cfab349ade29b3b71cf970e15c5b5cb3c3ac1	0x49b9e6118f5a29909a4c7f7fcee1aaafa87919bb	0x2bcd9686f81a9c3f7e640b02d12e45e53d6ef2d1	1.7e+17	0x	16112854	0xd61236fdbd6fef97cf690ea5a89f4ff5da7e8f6f320bde9a6d93247a9066d451
34503	0x2e03fcd8b7aa50d8971459fbdb6f9d98e40a66c97fd3eb151fa8f3debdc6c980	0x6e27eaadce8c04c3ce85d274d26f9d4f184e9d1f	0x68b3465833fb72a70ecdf485e0e4c7bd8665fc45	0	0x5ae401dc00000000000000000000000000000000000000000000000000000000638cdbf3000000000000000000000000000000000000000000000000000000000000004000000000000000000000000000000000000000000000000000000000000000030000000000000000000000000000000000000000000000000000000000000060000000000000000000000000000000000000000000000000000000000000018000000000000000000000000000000000000000000000000000000000000002a000000…	16112854	0xd61236fdbd6fef97cf690ea5a89f4ff5da7e8f6f320bde9a6d93247a9066d451
34504	0xb593832a5d448f84dc6c5138d47b89a8bfb43d28c8a141cbf2a648ce774ac0be	0xfdfc19148bdcf84daa04970c2e9b7064b68cca54	0x4bf858e6490af54f3cc626f19322984453e95995	0	0xecef920100000000000000000000000000000000000000000000000000000000000000630000000000000000000000000000000000000000000000000000000000000076	16112854	0xd61236fdbd6fef97cf690ea5a89f4ff5da7e8f6f320bde9a6d93247a9066d451
34505	0x040cd79cafe660e785bd74694561c94e1c9dd05820f163aa88cec6657e2bd6c5	0xc68d9a5ed5feefecf10239ecfd050ce03a9885f1	0x283af0b28c62c092c9727f1ee09c02ca627eb7f5	4370000000000000	0xf7a1696300000000000000000000000000000000000000000000000000000000000000c0000000000000000000000000c68d9a5ed5feefecf10239ecfd050ce03a9885f10000000000000000000000000000000000000000000000000000000001e185582316360444082055d086f6dcba83b32c1ae23acdab7b49abafeb14a9f611c1fb0000000000000000000000004976fb03c32e5b8cfe2b6ccb31c09ba78ebaba41000000000000000000000000c68d9a5ed5feefecf10239ecfd050ce03a9885f100000…	16112854	0xd61236fdbd6fef97cf690ea5a89f4ff5da7e8f6f320bde9a6d93247a9066d451
34507	0x876b440847b63a774937286f53fb2b66b75278120fd978cff486edf792b94496	0x7ec21bad87f164eb25987f95ed29baec55df3873	0x78c05a027d66f7b51f65962e31b2ee3de7099095	7e+18	0x	16112854	0xd61236fdbd6fef97cf690ea5a89f4ff5da7e8f6f320bde9a6d93247a9066d451
34511	0x85e90ecbc3656501a24a9643176e9fc9aebf08c0cc63bae7c90d1b819f9a4339	0x21a31ee1afc51d94c2efccaa2092ad1028285549	0x67fa57dfd63350f2ba1d5fbec11553194857c422	6.2e+16	0x	16112854	0xd61236fdbd6fef97cf690ea5a89f4ff5da7e8f6f320bde9a6d93247a9066d451
34512	0x4fe2211fdc679cc425591e161e26b4e18621da23c529f7f376c1ad8eeb7438e3	0x547eb32396e2ef542b8e99e2af7758c99027ab59	0xdbe9732d0a8595866be400995e15525e1ccbcaf0	0	0x42842e0e000000000000000000000000547eb32396e2ef542b8e99e2af7758c99027ab59000000000000000000000000c095c47dac26f7e602dbdaf9cc20beac0ef1a8200000000000000000000000000000000000000000000000000000000000000298360c6ebe	16112854	0xd61236fdbd6fef97cf690ea5a89f4ff5da7e8f6f320bde9a6d93247a9066d451
34513	0x5bec7ed81cc70311ec8823783ac37584c49576ee68a1c42482169e36a24a8177	0x4728840ddaf0ac0a250eccbe1d7fa075967ab13c	0xdac17f958d2ee523a2206206994597c13d831ec7	0	0x095ea7b3000000000000000000000000a6b44f5ea2fc90cda51828e61cebbd34bc63a98b0000000000000000000000000000000000000000000000000000000005f5e100	16112854	0xd61236fdbd6fef97cf690ea5a89f4ff5da7e8f6f320bde9a6d93247a9066d451
34514	0xc3218eff53ac6e6f57756296ac854a856ded82a5f58087ea9d19464d9b94e66f	0x8214afb98121e899ed870bdadb84e27b0fb3e573	0x0000000000c2d145a2526bd8c716263bfebe1a72	0	0x32389b7100000000000000000000000000000000000000000000000000000000000000400000007b02230091a7ed01230072f7006a004d60a8d4e71d599b8104250f00000000000000000000000000000000000000000000000000000000000000000001000000000000000000000000000000000000000000000000000000000000002000000000000000000000000000000000000000000000000000000000000000600000000000000000000000004895469f38d626659d772ecb140a9878973ce06900000…	16112854	0xd61236fdbd6fef97cf690ea5a89f4ff5da7e8f6f320bde9a6d93247a9066d451
34515	0x6c90fdbfbe708e609f216aaa6a4d9d05cc5e3f5ef223e249e09c82708858e545	0x4976a4a02f38326660d17bf34b431dc6e2eb2327	0xb6379cf3ec09da727593f1296454c7b27d03ba05	5.49e+16	0x	16112854	0xd61236fdbd6fef97cf690ea5a89f4ff5da7e8f6f320bde9a6d93247a9066d451
34516	0xd785d30f7b5f9218d61e549ec8845ab80b41776fd6d97fa7cdcea9fca0ec0142	0xcc01a0a8c3c242329eb3ca23581cb640e3086f1f	0xf9ffb0c9d3a6f32a54e965882b7e85c77e3bfe74	0	0xa22cb4650000000000000000000000001e0049783f008a0085193e00003d00cd54003c710000000000000000000000000000000000000000000000000000000000000001	16112854	0xd61236fdbd6fef97cf690ea5a89f4ff5da7e8f6f320bde9a6d93247a9066d451
34518	0x8446cb6d479bc30c6c76025e5fdd1163c2a991729288c57c1dbe09581980ac08	0x974caa59e49682cda0ad2bbe82983419a2ecc400	0xdac17f958d2ee523a2206206994597c13d831ec7	0	0xa9059cbb0000000000000000000000008e1b923b0f13aef69064b4630b9c6d49cd9a7b350000000000000000000000000000000000000000000000000000000035d2afc0	16112854	0xd61236fdbd6fef97cf690ea5a89f4ff5da7e8f6f320bde9a6d93247a9066d451
34519	0xd587afd6af00bfa36d6c4d873547a701f0bc3ddf6f3dc0d149d8faefb740360f	0x36ab6c7d5745fdfcd07511f95b20a42eef76b48b	0x92701d42e1504ef9fce6d66a2054218b048dda43	9e+16	0x59486cd1000000000000000000000000000000000000000000000000000000000000006000000000000000000000000000000000000000000000000000000000000011c0000000000000000000000000000000000000000000000000000000000000000000000000000000000000000000000000000000000000000000000000000000030000000000000000000000000000000000000000000000000000000000000060000000000000000000000000000000000000000000000000000000000000060000000…	16112854	0xd61236fdbd6fef97cf690ea5a89f4ff5da7e8f6f320bde9a6d93247a9066d451
34520	0x82ba18c7101b3b0064e556f795963ac8e50b48350b60aa26e1c7ae41880d0e9a	0xa6e950aa70ebaaf99686a5d95afe8aca8b5e353b	0xc02aaa39b223fe8d0a0e5c4f27ead9083c756cc2	0	0x2e1a7d4d00000000000000000000000000000000000000000000000000c6f3b40b6c0000	16112854	0xd61236fdbd6fef97cf690ea5a89f4ff5da7e8f6f320bde9a6d93247a9066d451
34521	0xf78d3a231cf6d1a61aa3bf3a918adf37493b68945a5673f42f45949d6f7623fb	0xf16e9b0d03470827a95cdfd0cb8a8a3b46969b91	0xf57e7e7c23978c3caec3c3548e3d615c346e79ff	0	0xa9059cbb000000000000000000000000160d005f2e503db0fbe6d14ce41ce1ba8542ebfc00000000000000000000000000000000000000000000001247904d65dca54000	16112854	0xd61236fdbd6fef97cf690ea5a89f4ff5da7e8f6f320bde9a6d93247a9066d451
34522	0x0472c1711592eef3b3f48acdd4454b1930803a136fccf4ff4cb5663f02ab80f2	0xcc8efeb2a5f50c81c5d7403676b198ae094b2f3c	0x00000000500e2fece27a7600435d0c48d64e0c00	94878487280	0xbb9b5e338d5c3b5735a8fc497d0bbbe9f8d3d0e3d837cee2000000	16112854	0xd61236fdbd6fef97cf690ea5a89f4ff5da7e8f6f320bde9a6d93247a9066d451
34523	0x804474c20943122fd6daf2e6a605c4ce44568969f0747ca4ac6466cadf7ee3d4	0xcc8efeb2a5f50c81c5d7403676b198ae094b2f3c	0x00000000500e2fece27a7600435d0c48d64e0c00	100000000000	0xca9b5e338d5c3b5735a8fc497d0bbbe9f8d3d0e3d8172401c05a6f9d569d731f747d3bfd66b1c68e54362246000000	16112854	0xd61236fdbd6fef97cf690ea5a89f4ff5da7e8f6f320bde9a6d93247a9066d451
34524	0x82b7186979d1d7b5555f54887a222d45eccf9a1e5f383ca39a99e53d46ee003b	0x3bfc4403a4ac85e17d6128fa298f699b35ac02f9	0xd6ae1b267942a79e8af229406620ce2a8b3b4ede	2.72e+18	0x	16112854	0xd61236fdbd6fef97cf690ea5a89f4ff5da7e8f6f320bde9a6d93247a9066d451
34527	0xac53486f7a0912d21dcc5d7f3a323a084c36cb6fe24696ea509bb3f5a292b43e	0x4ea7cf3b45426c2fbc1f045f9a739d7fec437a66	0x7a250d5630b4cf539739df2c5dacb4c659f2488d	0	0x791ac9470000000000000000000000000000000000000000000000000000c089b961e8cb00000000000000000000000000000000000000000000000001c3cc7476ffd35500000000000000000000000000000000000000000000000000000000000000a00000000000000000000000004ea7cf3b45426c2fbc1f045f9a739d7fec437a6600000000000000000000000000000000000000000000000000000000638cd572000000000000000000000000000000000000000000000000000000000000000200000…	16112854	0xd61236fdbd6fef97cf690ea5a89f4ff5da7e8f6f320bde9a6d93247a9066d451
34529	0x3d09092cde43682da271e12e737b9cd728663f007f2219bb78c26a3ba4129e64	0xee61f5fb0db81d3a09392375ee96f723c0620e07	0xf34b1db61aca1a371fe97bad2606c9f534fb9d7d	0	0xa9059cbb00000000000000000000000020dc1881db80cc49cb858441a4f159d060e5f9c800000000000000000000000000000000000000000000000b70369612f76c0000	16112854	0xd61236fdbd6fef97cf690ea5a89f4ff5da7e8f6f320bde9a6d93247a9066d451
34530	0x1962c82f458e10a545950a5848f5cc0e9b3819c4a78d63937ef978fd76bab8f1	0xb987242fdc9d4ec436f9a2f214ec3b67898bbdf8	0x06450dee7fd2fb8e39061434babcfc05599a6fb8	0	0x9ff054df0000000000000000000000000000000000000000000000000000000000000064	16112854	0xd61236fdbd6fef97cf690ea5a89f4ff5da7e8f6f320bde9a6d93247a9066d451
34532	0x2b44d280477743529b77939c0ff92ac25cf7c9aca5efd6918bcbde6ca0ea28e0	0x0acdd0fefb605957dfcba4816d77c43dec3f1f79	0x121df4531fd1be3e39bc143c594ca1524535419d	3000000000000000	0x	16112854	0xd61236fdbd6fef97cf690ea5a89f4ff5da7e8f6f320bde9a6d93247a9066d451
34533	0x95db63a7242cac843d8435b71708ef98bbbf1585cf9d003847b5c5db7cc5c845	0xf6cd0200a6b94ab46f2cbd5c934b358bbeb552ea	0xc02aaa39b223fe8d0a0e5c4f27ead9083c756cc2	0	0x095ea7b30000000000000000000000001e0049783f008a0085193e00003d00cd54003c71ffffffffffffffffffffffffffffffffffffffffffffffffffffffffffffffff	16112853	0xec82081e4f7a7f43bbec8d733664618fb24d49282fcfbb639ceff92ea9ca203b
34534	0x1316e4e4fe393cf6c2abbd2523931373b39e6795f21097ad5559ec32156e7925	0x1be210e7990eff6c07cb8cadcb9d077063ac3614	0xcba613003c842ffdff0ff8b8609360ad89f3b3bd	2100000000000000	0x	16112853	0xec82081e4f7a7f43bbec8d733664618fb24d49282fcfbb639ceff92ea9ca203b
34535	0x3f30378ebc3bdc45f5284ca40e46c917060310bd04389c325ce81194428708ec	0xf2db30412be7907e24c0c5009bc3eabe7ba5ff3f	0xc36442b4a4522e871399cd717abdd847ab11fe88	0	0xac9650d8000000000000000000000000000000000000000000000000000000000000002000000000000000000000000000000000000000000000000000000000000000020000000000000000000000000000000000000000000000000000000000000040000000000000000000000000000000000000000000000000000000000000012000000000000000000000000000000000000000000000000000000000000000a40c49ccbe000000000000000000000000000000000000000000000000000000000005d…	16112853	0xec82081e4f7a7f43bbec8d733664618fb24d49282fcfbb639ceff92ea9ca203b
34536	0xd28007c50f4315e56d6c5ec7d89886982526bcdf65fb600adef35bf1ae73fd42	0x46340b20830761efd32832a74d7169b29feb9758	0x7fc66500c84a76ad7e9c93437bfc5ac33e2ddae9	0	0xa9059cbb0000000000000000000000007f9336abc42d9470076686fec311feffb92f5df80000000000000000000000000000000000000000000000000e2ff06f01e1c000	16112853	0xec82081e4f7a7f43bbec8d733664618fb24d49282fcfbb639ceff92ea9ca203b
34539	0x0eeb30971ea185d5948cb9634ad5a591c80c6956386d9f44d11dd29a452685fb	0x016dbc709b8c1667d7303e2c4129167d660dc010	0x00000000006c3852cbef3e08e8df289169ede581	3.89e+16	0xfb0f3ee10000000000000000000000000000000000000000000000000000000000000020000000000000000000000000000000000000000000000000000000000000000000000000000000000000000000000000000000000000000000000000000000000000000000000000000000000000000000000000000000000078eced088ad800000000000000000000000000f755847b060b2871bddfdd6bdcb12c9d38e70e24000000000000000000000000004c00500000ad104d7dbd00e3ae0a5c00560c0000000…	16112853	0xec82081e4f7a7f43bbec8d733664618fb24d49282fcfbb639ceff92ea9ca203b
34540	0xd50a318bd514098fd30bda3e901b4b65c67558607ebdeb947782e80e71580c93	0x46340b20830761efd32832a74d7169b29feb9758	0xdac17f958d2ee523a2206206994597c13d831ec7	0	0xa9059cbb00000000000000000000000060e991d8135d06548c89f94c43b9b92ea06ae54e000000000000000000000000000000000000000000000000000000000fa933e0	16112853	0xec82081e4f7a7f43bbec8d733664618fb24d49282fcfbb639ceff92ea9ca203b
34541	0xc3a1d1975d2d792b50bc4283965973283978cc619e5e8bad04b94901e922d958	0x9e3ef83728a399d6f5f757e3fa04f4850bbfb5f0	0xdac17f958d2ee523a2206206994597c13d831ec7	0	0xa9059cbb0000000000000000000000007aebdd9cf0ebab6e42f8e9babd210160f4b2e3df0000000000000000000000000000000000000000000000000000000008f0d180	16112853	0xec82081e4f7a7f43bbec8d733664618fb24d49282fcfbb639ceff92ea9ca203b
34542	0x44d680802ae8dae9e7cd42d87a2ef9071acd73ed6a4513bbc4aa37ff67c66f16	0x74bbd8c912f760205fd754038303c018695cd43b	0x7a250d5630b4cf539739df2c5dacb4c659f2488d	0	0xded9382a00000000000000000000000071ab77b7dbb4fa7e017bc15090b21632214202820000000000000000000000000000000000000000000000002b5c374465f419e800000000000000000000000000000000000000000000000624c9a809d846e9770000000000000000000000000000000000000000000000000188a5ffede0a74200000000000000000000000074bbd8c912f760205fd754038303c018695cd43b00000000000000000000000000000000000000000000000000000000638ce07300000…	16112853	0xec82081e4f7a7f43bbec8d733664618fb24d49282fcfbb639ceff92ea9ca203b
34543	0xa5a971fa95824dfaa97b60996f0bca258d6c28195c9db65aa47c7de0de8e1aa7	0x1be210e7990eff6c07cb8cadcb9d077063ac3614	0xd366ef2d35eda200d615f9fa84f3d3425cac7da7	2100000000000000	0x	16112853	0xec82081e4f7a7f43bbec8d733664618fb24d49282fcfbb639ceff92ea9ca203b
34544	0xe291485cf56208a0802bbc3c07d81b8c8662fa554885519de10721e4a6709ee0	0x46340b20830761efd32832a74d7169b29feb9758	0xfdcf6b286f8249b92c50272d195b7a5786f85e37	1.11e+17	0x	16112853	0xec82081e4f7a7f43bbec8d733664618fb24d49282fcfbb639ceff92ea9ca203b
34546	0x38d9c8798d6639c3cca12c8352a890668f0f4b429cb86f3836a85e09452b00a0	0x46340b20830761efd32832a74d7169b29feb9758	0xa0b86991c6218b36c1d19d4a2e9eb0ce3606eb48	0	0xa9059cbb000000000000000000000000698e6bbe345b83469488147165d811bf86de970c0000000000000000000000000000000000000000000000000000000018701a80	16112853	0xec82081e4f7a7f43bbec8d733664618fb24d49282fcfbb639ceff92ea9ca203b
34548	0x389e95299fd41c4e82538694e354c9e009530ccd9c11a6fb456b055e4c9b0615	0x0165785451d594155677a91c9dc63dfd3c6c8409	0xf89d7b9c864f589bbf53a82105107622b35eaa40	1.72e+16	0x	16112853	0xec82081e4f7a7f43bbec8d733664618fb24d49282fcfbb639ceff92ea9ca203b
34549	0xc99171c0554fe9f7f05098c664253e724104bc22198951cc66706b7bcd204e90	0x143ca90dfa9d0424fc18b1c5510bbd44ca25132b	0xdac17f958d2ee523a2206206994597c13d831ec7	0	0xa9059cbb000000000000000000000000cb82786e423db19d305679d469fd34d8083bb088000000000000000000000000000000000000000000000000000000094a39af00	16112853	0xec82081e4f7a7f43bbec8d733664618fb24d49282fcfbb639ceff92ea9ca203b
34551	0x1e980131363dcfbe7e238e988db39b08cf8a0d99d029a00052342a6b5728985c	0x6f553e6028478cd56f85b888843d139fa4f5207d	0x03f34be1bf910116595db1b11e9d1b2ca5d59659	0	0xe47d166c0000000000000000000000000000000000000000000000000000000000000020000000000000000000000000000000000000000000000000000000000000028448093018000000000000000000000000bebc44782c7db0a1a60cb6fe97d0b483032ff1c7000000000000000000000000a0b86991c6218b36c1d19d4a2e9eb0ce3606eb48000000000000000000000000dac17f958d2ee523a2206206994597c13d831ec7000000000000000000000000000000000000000000000000000000012a090…	16112853	0xec82081e4f7a7f43bbec8d733664618fb24d49282fcfbb639ceff92ea9ca203b
34552	0xeff77e05a4f75336783d2a8f7daa75148b0087bba5bb0de1b8f0ef875c75d090	0x1be210e7990eff6c07cb8cadcb9d077063ac3614	0x2c8b139dc08fef0cd3ef0c361ab5a122c6a07771	2100000000000000	0x	16112853	0xec82081e4f7a7f43bbec8d733664618fb24d49282fcfbb639ceff92ea9ca203b
34553	0x59ec60685d7c73344e0cedf8ae9ea7db06ea2d8bcf370cbb0f260f2e01693765	0x36bc53a54cb1f4dc964cf0624e6063e467ff117d	0xf89d7b9c864f589bbf53a82105107622b35eaa40	1.72e+16	0x	16112853	0xec82081e4f7a7f43bbec8d733664618fb24d49282fcfbb639ceff92ea9ca203b
34554	0xb732fd0a2010174a647eb537f1286603eeb340e2ab23184667a25b9851f3cc16	0x74dec05e5b894b0efec69cdf6316971802a2f9a1	0x6d4f19e547dc21b30bf5ebd9e9ae876f4f3581bf	4.18e+16	0x	16112853	0xec82081e4f7a7f43bbec8d733664618fb24d49282fcfbb639ceff92ea9ca203b
34555	0x74117910029ac97dec89763515d3b9c577a20de9261cbddfb6bdc34ff74275d1	0x6af3236960a8f4b0fb977e9739fea883402674e5	0x51ae5e2533854495f6c587865af64119db8f59b4	0	0xa22cb46500000000000000000000000000000000000111abe46ff893f3b2fdf1f759a8a80000000000000000000000000000000000000000000000000000000000000001	16112853	0xec82081e4f7a7f43bbec8d733664618fb24d49282fcfbb639ceff92ea9ca203b
34557	0x076506b4e2bd7407917af6cc8182739aa72915214789951f51eba7e56a8b41b4	0xc520b8da0497e6f462670623e7523fc37aa4135d	0x68b3465833fb72a70ecdf485e0e4c7bd8665fc45	0	0x5ae401dc00000000000000000000000000000000000000000000000000000000638cdbe7000000000000000000000000000000000000000000000000000000000000004000000000000000000000000000000000000000000000000000000000000000020000000000000000000000000000000000000000000000000000000000000040000000000000000000000000000000000000000000000000000000000000016000000000000000000000000000000000000000000000000000000000000000e4472b4…	16112853	0xec82081e4f7a7f43bbec8d733664618fb24d49282fcfbb639ceff92ea9ca203b
34558	0x12f90524a7de50ec20131f8ec45780ee7924f9b62d0851a174117ea2613f4538	0x1be210e7990eff6c07cb8cadcb9d077063ac3614	0x46b69c9d5eacbc483fdc5e81121a2be665a56388	2100000000000000	0x	16112853	0xec82081e4f7a7f43bbec8d733664618fb24d49282fcfbb639ceff92ea9ca203b
34559	0x17bf3a07881cf237b2956c9f78d9e9933a9621cec11646e2b9bae3d3659de1e7	0x1be210e7990eff6c07cb8cadcb9d077063ac3614	0xc5d7b0e0ac9d92c6c1158b2ce71b9b55c70ada51	2100000000000000	0x	16112853	0xec82081e4f7a7f43bbec8d733664618fb24d49282fcfbb639ceff92ea9ca203b
34560	0xbf7ef926955c26b88bd1024784325a8d25050b97a9802a8d1485ee720fd5e503	0x4976a4a02f38326660d17bf34b431dc6e2eb2327	0x1163bc472a38bfffcc04582759f583ac31490465	9.99e+17	0x	16112853	0xec82081e4f7a7f43bbec8d733664618fb24d49282fcfbb639ceff92ea9ca203b
34561	0x09acd1082ae00efb08ea1ea8f316376dc03436ae6393152f7cf2ccae36753fba	0x080086911d8c78008800fae75871a657b77d0082	0x0000e0ca771e21bd00057f54a68c30d400000000	16112853	0x006c000000121fdae07ffcf0c139d8450177c0b8c3788608518687b585f7ae5a0000000000000000000000a45dfd5cc00d49d7fdeb2a3bb5e8abebd6f9a0ad3f0000000000000000000000a4c02aaa39b223fe8d0a0e5c4f27ead9083c756cc2000000000000000000000044022c0d9f0000000000000000000000000000000000000000000000000000000000000000000000000000000000000000000000000000000000000000020049099ec880630000000000000000000000000000e0ca771e21bd00057…	16112853	0xec82081e4f7a7f43bbec8d733664618fb24d49282fcfbb639ceff92ea9ca203b
34562	0x01d0a0bfae31cdc64b2f50064f8c20816c306903e67e8bda7ed6fcbcc25865c0	0x56eddb7aa87536c09ccc2793473599fd21a8b17f	0xedf26b7a47f26f2d039671f6f6a29d6a6bbb6c10	9030000000000000	0x	16112853	0xec82081e4f7a7f43bbec8d733664618fb24d49282fcfbb639ceff92ea9ca203b
34563	0xde80bb82bcfb93494f5d6b6c444ddb4fe350a027d72a6a40346d12814f120b0e	0x21a31ee1afc51d94c2efccaa2092ad1028285549	0x7fd06e4d1f50e302b437975ce3db722346f08e40	1.6e+19	0x	16112853	0xec82081e4f7a7f43bbec8d733664618fb24d49282fcfbb639ceff92ea9ca203b
34564	0x88cfb4b0e176e2646df943d82177407fefc139e35a91fb0a6af000db1cfc5cbe	0x19e34d09c2664d4f0829b1431ea73dac1b2bea93	0x4f4495243837681061c4743b74b3eedf548d56a5	0	0x09c5eabe00000000000000000000000000000000000000000000000000000000000000200000000000000000000000000000000000000000000000000000000000001e00000000000000000000000000000000000000000000000000000000000000004000000000000000000000000000000000000000000000000000000000000002a00000000000000000000000000000000000000000000000000000000000000240000000000000000000000000000000000000000000000000000000000000000100000…	16112853	0xec82081e4f7a7f43bbec8d733664618fb24d49282fcfbb639ceff92ea9ca203b
34567	0xea02e4b43b228ff9f0409dec1ddbb4ffd1f733b29ea172d23c8d713e899d15aa	0x394c66d777bbc09a50099cf7b9c3d736d3e1ec28	0x5c6edf201ac2db0b169288793dc2b5fb36a89f1e	6860000000000000	0x	16112853	0xec82081e4f7a7f43bbec8d733664618fb24d49282fcfbb639ceff92ea9ca203b
34570	0x61ff63410326e5b1f21748c7b94e90f37ba1d8d85e5b32ef8df8c384422992bd	0x9422fc4af669f966557cf9ea2f45725c65baf714	0xdac17f958d2ee523a2206206994597c13d831ec7	0	0xa9059cbb0000000000000000000000000401302ca99cd3fdc05579dbc43eb56cbde5d9bc00000000000000000000000000000000000000000000000000000000179a7b00	16112853	0xec82081e4f7a7f43bbec8d733664618fb24d49282fcfbb639ceff92ea9ca203b
34571	0x6f808f40ee20e7a610afae8683e29cb8efcf6c5e941d25ea27e01de8eb929d54	0xf2f5c73fa04406b1995e397b55c24ab1f3ea726c	0x4675c7e5baafbffbca748158becba61ef3b0a263	3.22e+16	0x	16112853	0xec82081e4f7a7f43bbec8d733664618fb24d49282fcfbb639ceff92ea9ca203b
34572	0x264a88adb32e0d126785e5ad23bb2e571c6ff7c8cddfa7c062653cb951da5a26	0x1be210e7990eff6c07cb8cadcb9d077063ac3614	0x8da1bf93c4a9bec49345b3c46660deb4e86aa835	2100000000000000	0x	16112853	0xec82081e4f7a7f43bbec8d733664618fb24d49282fcfbb639ceff92ea9ca203b
34573	0x108718ad6f67e6934bdda9070c3fc6ff1b08ea832e953080787194ff00c02e27	0x914ec51e16483c6a0f6ffb8fc3da35cea241cacc	0x7a250d5630b4cf539739df2c5dacb4c659f2488d	0	0x791ac9470000000000000000000000000000000000000000000000000042aea32b2d650700000000000000000000000000000000000000000000000000508d79c3013c6c00000000000000000000000000000000000000000000000000000000000000a0000000000000000000000000914ec51e16483c6a0f6ffb8fc3da35cea241cacc00000000000000000000000000000000000000000000000000000000638cd567000000000000000000000000000000000000000000000000000000000000000200000…	16112853	0xec82081e4f7a7f43bbec8d733664618fb24d49282fcfbb639ceff92ea9ca203b
34574	0xb4998203170c07a7503fac15725b89e3dc282bdda62d306fc1cf23b2d6f0fe82	0x46340b20830761efd32832a74d7169b29feb9758	0xf6622c68e7f081c1031d2f0aa8445079b05b1fb0	3.19e+18	0x	16112853	0xec82081e4f7a7f43bbec8d733664618fb24d49282fcfbb639ceff92ea9ca203b
34575	0x21843b3fbd855d1ba3000a5da0ad2bfad0ce91ecaa380d610a909360729fc726	0x46340b20830761efd32832a74d7169b29feb9758	0xdac17f958d2ee523a2206206994597c13d831ec7	0	0xa9059cbb0000000000000000000000001392bd8e31f24f4731ba2999dabcbf61efa756d5000000000000000000000000000000000000000000000000000000003b023380	16112853	0xec82081e4f7a7f43bbec8d733664618fb24d49282fcfbb639ceff92ea9ca203b
34578	0x49187abc20a56c1a3cbb57cb044ecd0dba3e4f764e4311065363f5805132db79	0x86182f3fdf0662db1f8eb4f22145a8c7a6065900	0xa0b86991c6218b36c1d19d4a2e9eb0ce3606eb48	0	0xa9059cbb000000000000000000000000a990b3920ea6d8be63eeb8c35fbb1fea22583144000000000000000000000000000000000000000000000000000000001908b100	16112853	0xec82081e4f7a7f43bbec8d733664618fb24d49282fcfbb639ceff92ea9ca203b
34580	0xc45332b7d551f71a9557e9845b0662f2b04bf940871729100d6b731a227b59d7	0xb7f6a97375e5a16e91101e22907d4f2ef7921ef5	0xf22195d3b628f6171a7fbc4decdea5c84f228c8c	0	0xb8ae5a2c000000000000000000000000000000000000000000000000000000000000002000000000000000000000000000000000000000000000000000000000000000010000000000000000000000001ae52c30e1be9a1128bb09e41d6fa3dfa8855753	16112853	0xec82081e4f7a7f43bbec8d733664618fb24d49282fcfbb639ceff92ea9ca203b
34581	0x3a514594121eaf569a5e3bc0cf8aee6e8c906fe86411f397bf31e649742e9086	0x6887246668a3b87f54deb3b94ba47a6f63f32985	0x5e4e65926ba27467555eb562121fac00d24e9dd2	0	0xd0f893440002b44c0b00006e0000050000000000000000000000000000000000000d00000000638cd4bd0000f5dc9d00001d00000000638cd4bd0000f5dc9e00002700000000638cd4cc0000f5dc9e00001d00000000638cd4cc0000f5dc9f789cecfd755c946bf3388eef2e2cdd0d52d24a8b944a97020a220a281dd22d21214b080848aea2827283202121d22d8d02920a921252d2a2b0e4eff5c039cf47ce815d399c7378debfd777febb7776ee7bae986bae996b662e10e8e54a2ac40ffa7d08e4cb5df70…	16112853	0xec82081e4f7a7f43bbec8d733664618fb24d49282fcfbb639ceff92ea9ca203b
34582	0x456937be552de9cd3802319f243d252bf0f15a461665049642442c07ea57b745	0x292f04a44506c2fd49bac032e1ca148c35a478c8	0xdac17f958d2ee523a2206206994597c13d831ec7	0	0x23b872dd000000000000000000000000c7f9b48604e9841f161bda54cb5a1a1a73ca78b5000000000000000000000000292f04a44506c2fd49bac032e1ca148c35a478c80000000000000000000000000000000000000000000000000000000002fadbff	16112853	0xec82081e4f7a7f43bbec8d733664618fb24d49282fcfbb639ceff92ea9ca203b
34583	0x06f59eab4bcfc03009ca218f2677c57dd0766c3aa118600666fe85e69a975db3	0x40541db1c46d53131283d9bbad52075fb8839c07	0xf89d7b9c864f589bbf53a82105107622b35eaa40	1.72e+16	0x	16112853	0xec82081e4f7a7f43bbec8d733664618fb24d49282fcfbb639ceff92ea9ca203b
34584	0x29e23423bb7c77ecbc34cc739f2f63f9f69c5969b38b8af724111eba3f20eebe	0x1be210e7990eff6c07cb8cadcb9d077063ac3614	0xc3c6e00e32cb96902ac0f1d18097cbd384c2912d	2100000000000000	0x	16112853	0xec82081e4f7a7f43bbec8d733664618fb24d49282fcfbb639ceff92ea9ca203b
34585	0x1d58b3de4f07e8017fe42840943842583585f7c1c96bcc3752a451e68f3774ae	0xcc3b844cda31c465e9dd8587d946aefdbcf081bb	0xc6dca8e9c9eb5a7eb68b04a69e63352d5d98695c	0	0xa22cb4650000000000000000000000001e0049783f008a0085193e00003d00cd54003c710000000000000000000000000000000000000000000000000000000000000001	16112853	0xec82081e4f7a7f43bbec8d733664618fb24d49282fcfbb639ceff92ea9ca203b
34586	0x75efb8a5a442afbd4cb2797f164366166848066465713cbedcd1b12f41a3881b	0xd54e4f8a55247487dd7c8c59f14ee5c0c2889477	0x1111111254fb6c44bac0bed2854e76f90643097d	0	0x2e95b6c8000000000000000000000000a0b93b9e90ab887e53f9fb8728c009746e989b5300000000000000000000000000000000000000000000017b5030c52c4e92be5300000000000000000000000000000000000000000000000000c4b2f7d58c32040000000000000000000000000000000000000000000000000000000000000080000000000000000000000000000000000000000000000000000000000000000280000000000000003b6d034095dbd611fe176b7ed92d4b02624d9d68fc47c4d300000…	16112853	0xec82081e4f7a7f43bbec8d733664618fb24d49282fcfbb639ceff92ea9ca203b
34587	0xc4ff5efe1d4394fe0782d0609333e6ad7029823e5124dc1f49501cd3449b8f73	0xa6213c1c97703abf90c78de30508713b16abdeaa	0xf89d7b9c864f589bbf53a82105107622b35eaa40	1.72e+16	0x	16112853	0xec82081e4f7a7f43bbec8d733664618fb24d49282fcfbb639ceff92ea9ca203b
34588	0x23a9cec50ea3f544362ef0283616814fdc395f3171121ef342099f0ae8e517a7	0xfe7b76247dc36c67b79ae1d4e1733f9c6d0f7e38	0xf89d7b9c864f589bbf53a82105107622b35eaa40	1.72e+16	0x	16112853	0xec82081e4f7a7f43bbec8d733664618fb24d49282fcfbb639ceff92ea9ca203b
34589	0x4bf00599e963b71c7d49459cda74abc1b457204f54856995f94fd1dc820e684a	0x46340b20830761efd32832a74d7169b29feb9758	0xa0b73e1ff0b80914ab6fe0444e65848c4c34450b	0	0xa9059cbb00000000000000000000000032904b67a5dd3a2e77d317cd62627f91d2545511000000000000000000000000000000000000000000000000000000060db88400	16112853	0xec82081e4f7a7f43bbec8d733664618fb24d49282fcfbb639ceff92ea9ca203b
34591	0xea2411267db3c866ec8acc95d0545a248177b76f5ffbf3496792fce20f1c877e	0x543a771785010945026f278f76bfed578a3e2f35	0x6748c23cb9d9f40ac75ec2c43106a8bc3197f82e	1.04e+16	0x	16112853	0xec82081e4f7a7f43bbec8d733664618fb24d49282fcfbb639ceff92ea9ca203b
34593	0x0e9b8f53535ec7069ef966c2389e886accaa989ee099be79b1e42619fa55cf97	0xbc6e70cb9b89851e6cff7ce198a774549f4c0f0c	0x68b3465833fb72a70ecdf485e0e4c7bd8665fc45	0	0x5ae401dc00000000000000000000000000000000000000000000000000000000638cdbdb000000000000000000000000000000000000000000000000000000000000004000000000000000000000000000000000000000000000000000000000000000020000000000000000000000000000000000000000000000000000000000000040000000000000000000000000000000000000000000000000000000000000016000000000000000000000000000000000000000000000000000000000000000e404e45…	16112853	0xec82081e4f7a7f43bbec8d733664618fb24d49282fcfbb639ceff92ea9ca203b
34594	0x3877079460e89efd2302f9bcd52a0c696aa241b1868475d5556645812d3dd1e8	0x6fd6afe08202d7aefdf533ee44dc0e62941c4b22	0x2ed6c4b5da6378c7897ac67ba9e43102feb694ee	0	0x6e5f69190000000000000000000000006fd6afe08202d7aefdf533ee44dc0e62941c4b22000000000000000000000000000000000000000000000000000000000000000100000000000000000000000000000000000000000000000000000000000000600000000000000000000000000000000000000000000000000000000000000000	16112853	0xec82081e4f7a7f43bbec8d733664618fb24d49282fcfbb639ceff92ea9ca203b
34595	0xe362603b1aadab73100cd94ef0ef447bb3a46c5dbf12173ec1b4c18ece1cb7de	0xdfd5293d8e347dfe59e90efd55b2956a1343963d	0x3845badade8e6dff049820680d1f14bd3903a5d0	0	0xa9059cbb000000000000000000000000c7947010c33579169f49ecd6866fcb61158d1e6e0000000000000000000000000000000000000000000000087f8492b3b7d41c00	16112853	0xec82081e4f7a7f43bbec8d733664618fb24d49282fcfbb639ceff92ea9ca203b
34596	0x118c182ca02a8afefff9bba0af875775bd7f2180894ee90ef0a81355b05137b3	0xe58564b8ce8344afdfe3a111bc0b541ee7f5f7fa	0xe42cad6fc883877a76a26a16ed92444ab177e306	0	0xa22cb46500000000000000000000000000000000000111abe46ff893f3b2fdf1f759a8a80000000000000000000000000000000000000000000000000000000000000001	16112853	0xec82081e4f7a7f43bbec8d733664618fb24d49282fcfbb639ceff92ea9ca203b
34597	0x62f9ea10b3960dd5c54f2891a8a6c13ff6550eb59c75a7a2337b0fafc89c06fd	0xd236a4fdbbb4294b26399f741661b5c06ac9cd27	0x6dd655f10d4b9e242ae186d9050b68f725c76d76	0	0xe67729b70000000000000000000000000000000000000000000000d990168ebaf9815dc7	16112853	0xec82081e4f7a7f43bbec8d733664618fb24d49282fcfbb639ceff92ea9ca203b
34598	0x0271c67635b1ee688da40a1d58219dc635c5a7abad9261e8244434532d948123	0xa7e5b18eb39889b1eab8a2211ae30ddb597caf8e	0xf89d7b9c864f589bbf53a82105107622b35eaa40	1.72e+16	0x	16112853	0xec82081e4f7a7f43bbec8d733664618fb24d49282fcfbb639ceff92ea9ca203b
34599	0x67e3b1601dcf1b11acb1022f0faccaaeb3b49054f843910c64e0a62aaedaf17b	0x46340b20830761efd32832a74d7169b29feb9758	0x95ad61b0a150d79219dcf64e1e6cc01f0b64c4ce	0	0xa9059cbb000000000000000000000000e75a929899f8794e04e65e029968a7e97289e475000000000000000000000000000000000000000000142ee6a682bb72f2000000	16112853	0xec82081e4f7a7f43bbec8d733664618fb24d49282fcfbb639ceff92ea9ca203b
34603	0x596bac49d06354b2819b8fb015306d752bf42d94bda73ea748c3cfc4dadf2641	0x710bda329b2a6224e4b44833de30f38e7f81d564	0xb8901acb165ed027e32754e0ffe830802919727f	0	0x23c452cd00000000000000000000000005cf5a2ab550518e74b09d7ecd28e3650f54f5a1000000000000000000000000000000000000000000000000037790a5e6d0634227e9940d21957baf57fb85fcfb0c085a8f81af01a67cadc3d8fb1a9b7ff3eba5000000000000000000000000000000000000000000000000000797813f1de19c	16112853	0xec82081e4f7a7f43bbec8d733664618fb24d49282fcfbb639ceff92ea9ca203b
34604	0x3f4ac3077ea9088c955ba3d5566f9d770e2855cd48f26634f9ea7bd4458634fc	0xe9f7d9d766550888d970338bf236fd4468c1a34f	0xf89d7b9c864f589bbf53a82105107622b35eaa40	1.72e+16	0x	16112853	0xec82081e4f7a7f43bbec8d733664618fb24d49282fcfbb639ceff92ea9ca203b
34605	0x5a7d64ca8ca064b9e0cea10e8970eff348a5179fe3bf6285735af1ccb2817325	0x5b32927c7138a4f9c295285d8a5e860ba991914b	0xa0b86991c6218b36c1d19d4a2e9eb0ce3606eb48	0	0xa9059cbb000000000000000000000000313c748799e51876e081c311dba434e76cc9f0340000000000000000000000000000000000000000000000000000000008677d40	16112853	0xec82081e4f7a7f43bbec8d733664618fb24d49282fcfbb639ceff92ea9ca203b
34606	0x79e77587d1a56487a1bdaeb1c716444330bfb04934098d91dd7d5731f1978dfc	0x46340b20830761efd32832a74d7169b29feb9758	0x6b6b8538bf350f30d586becf91f28389daaad0ec	4.02e+16	0x	16112853	0xec82081e4f7a7f43bbec8d733664618fb24d49282fcfbb639ceff92ea9ca203b
34607	0xee4d629fdd9eb4b905e5d73e9a32aa7835318352151375990d3afe3fbf6a2568	0x768e09e1f7b45243a1ce971d03f5a44f172d898f	0x652486db19c5276a6518dd884f620e3f8fac6b36	1.23e+17	0x	16112853	0xec82081e4f7a7f43bbec8d733664618fb24d49282fcfbb639ceff92ea9ca203b
34612	0x4df193cab941650a5b43999b6f1f1b6b30ac008c8d8474ea1865136a3827a644	0xc4dec83c9e5beae283bdb49e6fe6a6fc97d16451	0x70423fc4400c3dc01168ebe23f68d0f3ee9a0123	2900000000000000	0x5b6baa0d00000000000000000000000000000000116436392c464880ad8ac60cdbe55aae00000000000000000000000000000000000000000000000000000000000000600000000000000000000000000000000000000000000000000000000000f5dcdc00000000000000000000000000000000000000000000000000000000000000030000000000000000000000009084e3508ce3448df16f411e748e01831b635edc000000000000000000000000000000000000000000000000000945c7fadd200000000…	16112853	0xec82081e4f7a7f43bbec8d733664618fb24d49282fcfbb639ceff92ea9ca203b
34614	0x6a6139fa5ab487335bec745b9778f2569b5fc20cace58947b4dc97a51144d314	0x3ab8f8fa7f60cac88e1408a8eb5915edc5815af3	0x68b3465833fb72a70ecdf485e0e4c7bd8665fc45	0	0x5ae401dc00000000000000000000000000000000000000000000000000000000638cdbf30000000000000000000000000000000000000000000000000000000000000040000000000000000000000000000000000000000000000000000000000000000100000000000000000000000000000000000000000000000000000000000000200000000000000000000000000000000000000000000000000000000000000104472b43f3000000000000000000000000000000000000000000000000000000000bf7b…	16112853	0xec82081e4f7a7f43bbec8d733664618fb24d49282fcfbb639ceff92ea9ca203b
34616	0x4796e31dab12c3fc5c6de6067934f67cec155baad3a92e173a06964936a2aaa0	0x9a9d285915dd2fd35b7a80a11bf65ddba19da5a4	0x2f848984984d6c3c036174ce627703edaf780479	0	0xbb7398140000000000000000000000000000000000000000000000000000000000000008000000000000000000000000000000000000000000000000000000000000001e	16112853	0xec82081e4f7a7f43bbec8d733664618fb24d49282fcfbb639ceff92ea9ca203b
34617	0xe40274d5d8158c955e051fe3c7f8bfb7f44bcd2ba6e3dba10ad834a23edab1c2	0xcfc0f98f30742b6d880f90155d4ebb885e55ab33	0x85aa890423675b5ded5c210505e34e285ccad523	1.49e+17	0x	16112853	0xec82081e4f7a7f43bbec8d733664618fb24d49282fcfbb639ceff92ea9ca203b
34618	0xc56938e8707b2ee24d7a3583e668e32a204f595f3c8a2f9a97cbcd8e8465de8c	0x26d5a5d0f1e522f59735467212e53872dff20c09	0x283af0b28c62c092c9727f1ee09c02ca627eb7f5	4370000000000000	0xf7a1696300000000000000000000000000000000000000000000000000000000000000c000000000000000000000000026d5a5d0f1e522f59735467212e53872dff20c090000000000000000000000000000000000000000000000000000000001e18558a96e64249448040e2493247ae28ae0a95e7238077fd02083d9887663af8176ae0000000000000000000000004976fb03c32e5b8cfe2b6ccb31c09ba78ebaba4100000000000000000000000026d5a5d0f1e522f59735467212e53872dff20c0900000…	16112853	0xec82081e4f7a7f43bbec8d733664618fb24d49282fcfbb639ceff92ea9ca203b
34619	0x865ebf28757ae13c1904ce59af7031fcc127033c6d1f7e8773370e707ab14ee8	0xb590904ef26829cc3ce951784adf2fb2d7faeb2f	0xd739abd0184b54ba0372c5b1b7e866cdbad39822	1e+17	0x	16112853	0xec82081e4f7a7f43bbec8d733664618fb24d49282fcfbb639ceff92ea9ca203b
34620	0xa44d23b3a1aa5d60f1f364f47cc6930c42c1f44ab752818f54fdee6ec439d21e	0xc6904c85164ca2c65b7188197c38acfa8a98b2fe	0x1603223bbb9167a02396ee97cbaa9748a0604f42	9200000000000000	0x	16112853	0xec82081e4f7a7f43bbec8d733664618fb24d49282fcfbb639ceff92ea9ca203b
34621	0x2fddb6dde883608ff60e4f5e2a49e955dba623d0c4d2f4cf9aefe3017fa24ee5	0x91e108fa77ffa155c154c7fe8fcaeb83888255aa	0xdef1c0ded9bec7f1a1670819833240f027b25eff	2.54e+17	0xd9627aa400000000000000000000000000000000000000000000000000000000000000800000000000000000000000000000000000000000000000000387aaeb273a7d3d000000000000000000000000000000000000000000000001314fb3706298000000000000000000000000000000000000000000000000000000000000000000010000000000000000000000000000000000000000000000000000000000000002000000000000000000000000eeeeeeeeeeeeeeeeeeeeeeeeeeeeeeeeeeeeeeee00000…	16112853	0xec82081e4f7a7f43bbec8d733664618fb24d49282fcfbb639ceff92ea9ca203b
34622	0xe75314aa8d1df5fe4cfa7145b04429f6085a564f2b54ff27f9a18de74f1e5e9d	0x0dfba27c25f1b15c574888070bdec57dd0cf3f7e	0x68b3465833fb72a70ecdf485e0e4c7bd8665fc45	4.15e+16	0x5ae401dc00000000000000000000000000000000000000000000000000000000638ce2e3000000000000000000000000000000000000000000000000000000000000004000000000000000000000000000000000000000000000000000000000000000020000000000000000000000000000000000000000000000000000000000000040000000000000000000000000000000000000000000000000000000000000016000000000000000000000000000000000000000000000000000000000000000e442712…	16112853	0xec82081e4f7a7f43bbec8d733664618fb24d49282fcfbb639ceff92ea9ca203b
34623	0xbc15154875a95f1fde1802e0265973d430cca3179b303d45eee08ba60aa1e6ec	0xdd31d77a2cee923aabf51366e3acfaa78c3c3c44	0xa273fbbbcca36c652e5c244eea0877daeeb8e995	1.8e+16	0x	16112853	0xec82081e4f7a7f43bbec8d733664618fb24d49282fcfbb639ceff92ea9ca203b
34624	0x9458c4f17c230355a2fb44cb915f6f782c361341de460efb77d6947b9e518716	0xa8e6ec181bc616c6c22c42bc5f5d52ca63955ea6	0xdac17f958d2ee523a2206206994597c13d831ec7	0	0xa9059cbb000000000000000000000000821b492b2b5786e2af4574d16020a2de35cf52e3000000000000000000000000000000000000000000000000000000000dbbc710	16112853	0xec82081e4f7a7f43bbec8d733664618fb24d49282fcfbb639ceff92ea9ca203b
34625	0xbe10ade5aab4fa043495e940f7483b28ca5370ab66e2a054992345a82ce2a1fa	0xf54460b638f0176d67f8f3953ed4fb4e5abdc683	0x68b3465833fb72a70ecdf485e0e4c7bd8665fc45	0	0x5ae401dc00000000000000000000000000000000000000000000000000000000638cdbdb0000000000000000000000000000000000000000000000000000000000000040000000000000000000000000000000000000000000000000000000000000000100000000000000000000000000000000000000000000000000000000000000200000000000000000000000000000000000000000000000000000000000000104472b43f300000000000000000000000000000000000000000000000000000045d964b…	16112853	0xec82081e4f7a7f43bbec8d733664618fb24d49282fcfbb639ceff92ea9ca203b
34626	0x9d901ed7cbb2e0803c83351fdd48f37c2b5020e08699fd083d5026d0474b5754	0x5d7b357e385175ee83a9f29eb7c1241f46352379	0x06450dee7fd2fb8e39061434babcfc05599a6fb8	0	0x9ff054df000000000000000000000000000000000000000000000000000000000000007d	16112853	0xec82081e4f7a7f43bbec8d733664618fb24d49282fcfbb639ceff92ea9ca203b
34627	0x204d2644fce58f4bd20eacc60d0fc7c13fc69d27a43c734ba64a82f1bba72dd2	0x46340b20830761efd32832a74d7169b29feb9758	0xdac17f958d2ee523a2206206994597c13d831ec7	0	0xa9059cbb000000000000000000000000278d2e3af3398e65b597357f91ae9d1da93a3780000000000000000000000000000000000000000000000000000000006a1d5ff0	16112853	0xec82081e4f7a7f43bbec8d733664618fb24d49282fcfbb639ceff92ea9ca203b
34628	0xe26d1697dd702a67d94de2921ed23120df7d34bed818c393d5f00a9e5d3e8852	0xa4e5961b58dbe487639929643dcb1dc3848daf5e	0xf9c309bde27d082e3f10c5b14d350941524104d8	1520000000000000	0x	16112853	0xec82081e4f7a7f43bbec8d733664618fb24d49282fcfbb639ceff92ea9ca203b
34629	0x9a5f0be296f06abc049f6aed409ed71b0d21ec01cf5711aa0fbc0b86e67cb3b2	0x46340b20830761efd32832a74d7169b29feb9758	0xdac17f958d2ee523a2206206994597c13d831ec7	0	0xa9059cbb0000000000000000000000003e96ecb5454f14b82eef7d6cf7bbfdd86468530b0000000000000000000000000000000000000000000000000000000002625a00	16112853	0xec82081e4f7a7f43bbec8d733664618fb24d49282fcfbb639ceff92ea9ca203b
34632	0x7a455db381e1e0c3b21b8c9138dd24e38b9057c7e9cfb74eae9fcca986f3035e	0x6dec4b6c66fdb0df742e05f7f277ed7232596c71	0xb7ab762d27959802aabfb0ddd8d45df0817242ed	0	0x42842e0e0000000000000000000000006dec4b6c66fdb0df742e05f7f277ed7232596c71000000000000000000000000957f8e6ad17233f57a06d1bc42f17f606121b42b0000000000000000000000000000000000000000000000000000000000000afd	16112853	0xec82081e4f7a7f43bbec8d733664618fb24d49282fcfbb639ceff92ea9ca203b
34635	0xa58beaeb6fc63b592cee3af02477c6ed17de268af5b58e8f0872a59b53de6f6c	0x9696f59e4d72e237be84ffd425dcad154bf96976	0xd18cde85edb0e5ae4b3ac29162d91029ddf923d0	5.02e+17	0x	16112853	0xec82081e4f7a7f43bbec8d733664618fb24d49282fcfbb639ceff92ea9ca203b
34637	0x620dde64b99640ead981f93f02b2aebb248eb4ac51a82d2d1cf5a09c39e0eaa1	0xec73c26bff22365a34148ab312c2d57730d2eed3	0xed975db5192ab41713f0080e7306e08188e53e7f	0	0xefef39a10000000000000000000000000000000000000000000000000000000000000001	16112853	0xec82081e4f7a7f43bbec8d733664618fb24d49282fcfbb639ceff92ea9ca203b
34638	0x0cdf6f356bb502c0febb4af83bfd11ec98091b34c8810fe98c0e59b184490c0d	0x3264a9468f0b89643f377add8e5fb119d495435e	0x68b3465833fb72a70ecdf485e0e4c7bd8665fc45	0	0x5ae401dc00000000000000000000000000000000000000000000000000000000638cdbdb0000000000000000000000000000000000000000000000000000000000000040000000000000000000000000000000000000000000000000000000000000000300000000000000000000000000000000000000000000000000000000000000600000000000000000000000000000000000000000000000000000000000000160000000000000000000000000000000000000000000000000000000000000028000000…	16112853	0xec82081e4f7a7f43bbec8d733664618fb24d49282fcfbb639ceff92ea9ca203b
34639	0xaeab3b0a949a6e39803780214af31ca08d189e5ce9cca98cd7a9c0ba86783564	0x48c04ed5691981c42154c6167398f95e8f38a7ff	0x95ad61b0a150d79219dcf64e1e6cc01f0b64c4ce	0	0xa9059cbb000000000000000000000000bb8b3c421e2a5bb6840116386ee3d6145765131100000000000000000000000000000000000000000003ff6e34d0d372be03a400	16112853	0xec82081e4f7a7f43bbec8d733664618fb24d49282fcfbb639ceff92ea9ca203b
34640	0xf50c0d7ab205916217e08221d3a1b4d0bbf6a3bfefef00d3e07f9a152feee75d	0x09b3492c9121ee69e3b807f63186d63b3d2ac568	0xf89d7b9c864f589bbf53a82105107622b35eaa40	1.72e+16	0x	16112853	0xec82081e4f7a7f43bbec8d733664618fb24d49282fcfbb639ceff92ea9ca203b
34641	0x2bc8953067cf1a39101d1e9a6ed8acf7e1eea446e365275efd86746aa2ef2325	0x4a0d1dd9cf6e30a2a40d76cd96f483abe6e86efa	0xf89d7b9c864f589bbf53a82105107622b35eaa40	1.72e+16	0x	16112853	0xec82081e4f7a7f43bbec8d733664618fb24d49282fcfbb639ceff92ea9ca203b
34642	0x52609f4eff7db092421ff4e9f13639f2b05fd3f08d6b9871995f7bfc4327209b	0x2f5fc65b9c6d1fee8ba4ca23fb2d7c363c95133c	0x0b17cbf93a6bc286a2760ad206b03d4e42997382	0	0xa22cb46500000000000000000000000000000000000111abe46ff893f3b2fdf1f759a8a80000000000000000000000000000000000000000000000000000000000000001	16112853	0xec82081e4f7a7f43bbec8d733664618fb24d49282fcfbb639ceff92ea9ca203b
34643	0xc8f9f1c4705086410a09d52f73209686807bf8a3542b1a09553aa939de45a427	0x5fb1b08d6b6c5430bd8163b93f312d7ab4f17d16	0x90e26f4a134658861f76456882bc0852f4ca95ed	1590000000000000	0x	16112853	0xec82081e4f7a7f43bbec8d733664618fb24d49282fcfbb639ceff92ea9ca203b
34645	0xcd27b3a5c6eae287c2c06fa7b8d2c727715d30a2b9470a7305ede923c9b7e103	0x24639284103e525d910bf0587ba58e65abc7f065	0xf89d7b9c864f589bbf53a82105107622b35eaa40	2000000000000000	0x	16112853	0xec82081e4f7a7f43bbec8d733664618fb24d49282fcfbb639ceff92ea9ca203b
34646	0x494180f9d0d85cdd7f63173ccc88668e09886f5afd35a6d4984b4f36333a541f	0x56eddb7aa87536c09ccc2793473599fd21a8b17f	0xdac17f958d2ee523a2206206994597c13d831ec7	0	0xa9059cbb000000000000000000000000695349c7981dcff84f9b5125b35b372fc55931b600000000000000000000000000000000000000000000000000000000b2b5a0da	16112853	0xec82081e4f7a7f43bbec8d733664618fb24d49282fcfbb639ceff92ea9ca203b
34647	0xf445c6d1235906cec318a38ab961bc73fe134446ffc9eb7bc19ca4f7ea723d75	0x9df9d082c6d613dc6428125280ba0ebab1ff045a	0xf4565dcb2b18ac03714743608f8b7d834e520f1d	0	0x095ea7b300000000000000000000000068b3465833fb72a70ecdf485e0e4c7bd8665fc45ffffffffffffffffffffffffffffffffffffffffffffffffffffffffffffffff	16112853	0xec82081e4f7a7f43bbec8d733664618fb24d49282fcfbb639ceff92ea9ca203b
34648	0xdac072d3851b739419cbf049c0e2f8e7887073e8d4e72f3dfad2f19ee01be812	0x28c6c06298d514db089934071355e5743bf21d60	0xdac17f958d2ee523a2206206994597c13d831ec7	0	0xa9059cbb000000000000000000000000ba5c22cc150e26d46c2bd3402639af4674c69e18000000000000000000000000000000000000000000000000000000003b9aca00	16112853	0xec82081e4f7a7f43bbec8d733664618fb24d49282fcfbb639ceff92ea9ca203b
34649	0x5223b9c71e7381161d059e489d795d66db3b426ff0f3acfffd4d474c2bf25350	0xc77a1222f675b4142ded8998e7cb938fea1db44d	0x76f4eed9fe41262669d0250b2a97db79712ad855	0	0xf17a454600000000000000000000000000000000000000000000000000000000000000c000000000000000000000000000000000000000000000000000000000000001a0000000000000000000000000000000000000000000000001158e460913cff06000000000000000000000000000000000000000000000000115872b0bca42f0600000000000000000000000001d64fb0ffa8362b2e1ee7ee03929159551eab26e000000000000000000000000000000000000000000000000000000000000022000000…	16112853	0xec82081e4f7a7f43bbec8d733664618fb24d49282fcfbb639ceff92ea9ca203b
34650	0xb403bea50150e028f17c9584d06c08ebed48c26326356b73e3e5f16a4aa70797	0xdfd5293d8e347dfe59e90efd55b2956a1343963d	0x8e48fba9b09146f2e0c64807003f8168ef46bd4b	3.89e+16	0x	16112853	0xec82081e4f7a7f43bbec8d733664618fb24d49282fcfbb639ceff92ea9ca203b
34651	0x1c372ecf4825741634258d7d1bc7bde040ab040d965f915a12033942792a7735	0x4ad1caec5bd0ad39649126364d0e9f160ab1528f	0x283af0b28c62c092c9727f1ee09c02ca627eb7f5	4370000000000000	0xf7a1696300000000000000000000000000000000000000000000000000000000000000c00000000000000000000000004ad1caec5bd0ad39649126364d0e9f160ab1528f0000000000000000000000000000000000000000000000000000000001e1855805ed89cd3f43cf2ea4f71d7e52c001edf86c7173c667af7af34b21749766ffd10000000000000000000000004976fb03c32e5b8cfe2b6ccb31c09ba78ebaba410000000000000000000000004ad1caec5bd0ad39649126364d0e9f160ab1528f00000…	16112853	0xec82081e4f7a7f43bbec8d733664618fb24d49282fcfbb639ceff92ea9ca203b
34652	0x48eb9be74e4663997074f2ba36c1b440ffd11786de5a275f0e8b06abc16a9dc4	0x83f3628dc35d21f1b7ac443ec829436894b5a9ed	0x084b1c3c81545d370f3634392de611caabff8148	0	0xc47f00270000000000000000000000000000000000000000000000000000000000000020000000000000000000000000000000000000000000000000000000000000000c67756761313938342e6574680000000000000000000000000000000000000000	16112853	0xec82081e4f7a7f43bbec8d733664618fb24d49282fcfbb639ceff92ea9ca203b
34654	0xfd4713dfb0002c7578adffcdcd236bd9a0775f88887fa37431a258cc35bfbd16	0xd65e0cbd31977b2e0e23c8330c8b5f020818fc91	0xdac17f958d2ee523a2206206994597c13d831ec7	0	0xa9059cbb0000000000000000000000006c20cf05a27e363caaf1e3c0266449f5bf80a35f0000000000000000000000000000000000000000000000000000000006607556	16112853	0xec82081e4f7a7f43bbec8d733664618fb24d49282fcfbb639ceff92ea9ca203b
34655	0xcb7a84736f1a3569f34551aea894369bd916abb6371830bc4b5b75136f0ae6c0	0x28c6c06298d514db089934071355e5743bf21d60	0x7dd9c5cba05e151c895fde1cf355c9a1d5da6429	0	0xa9059cbb00000000000000000000000090bf376fc259632953fc8f5509a7942d255e831b000000000000000000000000000000000000000000000018493fba64ef000000	16112853	0xec82081e4f7a7f43bbec8d733664618fb24d49282fcfbb639ceff92ea9ca203b
34656	0xc8ecc8112a30ea5f36085e61fea0a0f186cbcee6c0709af7ebf6b62f717a0f7f	0x11c9a9a80a82b4b66fb71a8e13b28f9d7a32a245	0xf89d7b9c864f589bbf53a82105107622b35eaa40	1.72e+16	0x	16112853	0xec82081e4f7a7f43bbec8d733664618fb24d49282fcfbb639ceff92ea9ca203b
34658	0x8034f2c29b6e5f2c0550ff1d6382a5a14ca60f5ebf8d7004dcb107a4e56ecd03	0xdfd5293d8e347dfe59e90efd55b2956a1343963d	0xdac17f958d2ee523a2206206994597c13d831ec7	0	0xa9059cbb0000000000000000000000005b311a7b4a1fd1ffab5af8757919dfebf7170b060000000000000000000000000000000000000000000000000000000003936e65	16112853	0xec82081e4f7a7f43bbec8d733664618fb24d49282fcfbb639ceff92ea9ca203b
34660	0x03074499e7610c0f3e564b8295c68a27a32a8f87db0b7cf4e9663fd7c4e40fbd	0xa4b1e63cb4901e327597bc35d36fe8a23e4c253f	0x1c479675ad559dc151f6ec7ed3fbf8cee79582b6	0	0x8f111f3c000000000000000000000000000000000000000000000000000000000000957400000000000000000000000000000000000000000000000000000000000000c00000000000000000000000000000000000000000000000000000000000048d91000000000000000000000000e64a54e2533fd126c2e452c5fab544d80e2e4eb500000000000000000000000000000000000000000000000000000000014664a9000000000000000000000000000000000000000000000000000000000146668700000…
34661	0x1ba11756718ec17dd435299e109a66154b5c33b1c1db3517278672886904db20	0xff9911abdbe9d1f7d1a19595b93905c2a9ad60f4	0x00000000006c3852cbef3e08e8df289169ede581	0	0xe7acab24000000000000000000000000000000000000000000000000000000000000008000000000000000000000000000000000000000000000000000000000000006600000007b02230091a7ed01230072f7006a004d60a8d4e71d599b8104250f0000000000000000000000000000000000000000000000000000000000000000000000000000000000000000000000000000000000000000000000000000000000a0000000000000000000000000000000000000000000000000000000000000000100000…	16112853	0xec82081e4f7a7f43bbec8d733664618fb24d49282fcfbb639ceff92ea9ca203b
34664	0xad856b092e5a9cca11237ab393439e4a0cd7731b0245ed44fb2388527d92b516	0x46340b20830761efd32832a74d7169b29feb9758	0x2c0e3055630bcc1668002cdf9b842627a861006e	7.81e+16	0x	16112853	0xec82081e4f7a7f43bbec8d733664618fb24d49282fcfbb639ceff92ea9ca203b
34666	0x457b5e17e3b19e1f974e227daf02b710fb32fdaf10cac018394db5b1e69ff57f	0x1be210e7990eff6c07cb8cadcb9d077063ac3614	0xaf8139fd3284f9ea85ca9e93a0528d2ef21d252c	2100000000000000	0x	16112852	0x86dc1835ffeaa2400f2d60c970145d7ab4115784014d96b39910ef27f56849ad
34667	0x52bb9191ba2017521facf63833a7845b15054dc977fc4a74e5fd5d5f5f51f9ff	0x95a9bd206ae52c4ba8eecfc93d18eacdd41c88cc	0xbc4300103a67f747129ce62f2be1f3c8acb82a85	8130000000000000	0x	16112852	0x86dc1835ffeaa2400f2d60c970145d7ab4115784014d96b39910ef27f56849ad
34669	0xf890f003358557321939171c5ab83dc86e767655714a6c2d68bfce7d89fb5ebf	0x95a9bd206ae52c4ba8eecfc93d18eacdd41c88cc	0x3aed13c5945c088c47f91a4d5750307cecb2e56e	8720000000000000	0x	16112852	0x86dc1835ffeaa2400f2d60c970145d7ab4115784014d96b39910ef27f56849ad
34670	0x82e0c656a6f891aaa759b6e776662821f1f4838e00a03f5dc4ccde51847e679c	0x2211ed0f73daa4c97b403dd12b7e28da59852dac	0x943319b22490f93555c53f72f3aa9e31219d99f4	3.9e+19	0x	16112852	0x86dc1835ffeaa2400f2d60c970145d7ab4115784014d96b39910ef27f56849ad
34671	0x34619f85968d21cd9fe88b09df64e6dc38793b25335363e9a4bf18a7c3d0fbe1	0xb66634d2c8fd5bc7571cacd0ce44db27210605d1	0x00000000006c3852cbef3e08e8df289169ede581	3e+16	0xfb0f3ee1000000000000000000000000000000000000000000000000000000000000002000000000000000000000000000000000000000000000000000000000000000000000000000000000000000000000000000000000000000000000000000000000000000000000000000000000000000000000000000000000005fec5b60ef8000000000000000000000000000513c0b27708461939c2a9867211add21eb0db1e6000000000000000000000000004c00500000ad104d7dbd00e3ae0a5c00560c0000000…	16112852	0x86dc1835ffeaa2400f2d60c970145d7ab4115784014d96b39910ef27f56849ad
34673	0x426045c70b3878bccde47a082b7eded950d3f206ecec5c6449b6b77784a9775e	0xfd0b92f76dc3672187375c692ff52d89717ad951	0x00000000006c3852cbef3e08e8df289169ede581	0	0xe7acab24000000000000000000000000000000000000000000000000000000000000008000000000000000000000000000000000000000000000000000000000000005a00000007b02230091a7ed01230072f7006a004d60a8d4e71d599b8104250f0000000000000000000000000000000000000000000000000000000000000000000000000000000000000000000000000000000000000000000000000000000000a0000000000000000000000000000000000000000000000000000000000000000400000…	16112852	0x86dc1835ffeaa2400f2d60c970145d7ab4115784014d96b39910ef27f56849ad
34674	0x81466147d5aeda75420c7153313ba243270d1322cfd9be759e3c05b14e18bc68	0x4d846da8257bb0ebd164eff513dff0f0c2c3c0ba	0x665fd6dcae2aff18bddb115faa05220d95df4364	3.37e+16	0x	16112852	0x86dc1835ffeaa2400f2d60c970145d7ab4115784014d96b39910ef27f56849ad
34675	0x13bc6916a9fc6d15da991baa4bd46a48adc7001f89d354b3882d7ca9dd4fdcce	0xdfd5293d8e347dfe59e90efd55b2956a1343963d	0xdac17f958d2ee523a2206206994597c13d831ec7	0	0xa9059cbb000000000000000000000000c2a501f4c464312472b966ab7f5209f7a72ce2ae00000000000000000000000000000000000000000000000000000000700e8600	16112852	0x86dc1835ffeaa2400f2d60c970145d7ab4115784014d96b39910ef27f56849ad
34676	0xf4342bb11e4e0dadb273a22247ed163510198a02d9eaf58bdd3208edac58c36b	0xc24d30475eca133302192b502085a3cc124b0b9b	0x364e94a1bf09fc6498e979e7715bb13fa6e9f807	0	0x3043891ed547c2b56a1dbe820bd56f58c2969bce920a3a2c417bc227d72cb6942959a07000000000000000000000000000000000000000000000000000000000000000400000000000000000000000000000000000000000000000000000000000000100ac17f3cc15b88acb5a843c7b860d8243e2e0cd71132ec23f90fcb490ea5b3d2d29d52ab8e92ec7567ed93e62acaaae733e22b77d56b5b44565d12c1df81a9e6ba2bf0e3c4673020049b73e62ad5da2c6412cdf3a18b5b44565d12c1df81a9e6baccf3…	16112852	0x86dc1835ffeaa2400f2d60c970145d7ab4115784014d96b39910ef27f56849ad
34677	0xc8a6c3d128407ee79d1a10402c5549d867a95c120494b29bf556992f86e56d88	0x28c6c06298d514db089934071355e5743bf21d60	0xa1d0e215a23d7030842fc67ce582a6afa3ccab83	0	0xa9059cbb000000000000000000000000957dfcf8b9af7591a83b0ca4c895a0403f9c3a7c00000000000000000000000000000000000000000000000002a970f11c0d0000	16112852	0x86dc1835ffeaa2400f2d60c970145d7ab4115784014d96b39910ef27f56849ad
34678	0xff86c2f55981f13e9addceb919b82f3df349e06948849d36f617f55de859172b	0x0fd3181b08f707377f44c7efaa373862c8ac8ad0	0x41a197b667ccab41fcbcea26945f3234c91f0dc1	2.5e+16	0x	16112852	0x86dc1835ffeaa2400f2d60c970145d7ab4115784014d96b39910ef27f56849ad
34680	0x220d25ec40bb24ad272e630a6b10574c5d169e544bcffa1d8644ab1cfbfa2a38	0x34fcaea5f3d32965eaa083bf85a0025fe8098c21	0x00000000006c3852cbef3e08e8df289169ede581	0	0xfd9f1e1000000000000000000000000000000000000000000000000000000000000000200000000000000000000000000000000000000000000000000000000000000002000000000000000000000000000000000000000000000000000000000000004000000000000000000000000000000000000000000000000000000000000004c000000000000000000000000034fcaea5f3d32965eaa083bf85a0025fe8098c21000000000000000000000000004c00500000ad104d7dbd00e3ae0a5c00560c0000000…	16112852	0x86dc1835ffeaa2400f2d60c970145d7ab4115784014d96b39910ef27f56849ad
34681	0xdde074bc5f225858df72e3b34802cbac60035193fd73d030060ae6a5bc4b46bb	0xe2dd246ee1430d33f16f971e42dfa47f2464bd70	0xdd214b04cfef0e783a20694347e451da934d1eb5	1200000000000000	0x	16112852	0x86dc1835ffeaa2400f2d60c970145d7ab4115784014d96b39910ef27f56849ad
34682	0xdda3bba5030d49b98d47a7dcef843e325c09fed12120d05d8371a3b0256256a3	0xeab596ebf75879fcd6493467441d07c5e7dffc9a	0xbf6727d4af6d3ff79c63bb780a36172ee6788e22	8.02e+16	0x	16112852	0x86dc1835ffeaa2400f2d60c970145d7ab4115784014d96b39910ef27f56849ad
34683	0xf28dfc0d796d2e93a2b2a063b57cc9669e424c556589fe90cf97a4b177abf00c	0x646a2d71ae5dba9a7b116604cf93c22ba52e52f7	0xce74c68d63c091c1909ee068e8efbc38c673fc5a	1.59e+16	0x	16112852	0x86dc1835ffeaa2400f2d60c970145d7ab4115784014d96b39910ef27f56849ad
34684	0xea5ce82f7c37de1461b0e9d88021054e93b7443578547297efe1ec93db96fe21	0x85f69c78ba2a2bbf9c9a2589022d503f1a102c9b	0x805c2077f3ab224d889f9c3992b41b2f4722c787	0	0xa9059cbb000000000000000000000000e8f266e67ab8390869c0659b7d3625a3c06b52dc0000000000000000000000000000000000000000000000000000000000000049	16112852	0x86dc1835ffeaa2400f2d60c970145d7ab4115784014d96b39910ef27f56849ad
34685	0x4b5ed2cec9193c9568a87bbf12cd91dceb642dca6f0766be1f74519b54424583	0x1be210e7990eff6c07cb8cadcb9d077063ac3614	0x42974c4bfaddeeefae429e2bf138343df60c5d8e	2100000000000000	0x	16112852	0x86dc1835ffeaa2400f2d60c970145d7ab4115784014d96b39910ef27f56849ad
34686	0x6a82f740192b11baf91b3a253847e0fca082e9bec893ac992ed0f47369258afe	0x75e89d5979e4f6fba9f97c104c2f0afb3f1dcb88	0x6d13680d2a818d8e38ed0b7002e27fcb1b43d51e	2.9e+16	0x	16112852	0x86dc1835ffeaa2400f2d60c970145d7ab4115784014d96b39910ef27f56849ad
34687	0x3bce0586e4bce70321227e358cab4dd7fea80d552e4cb72c5b7a3689b7a42438	0x4976a4a02f38326660d17bf34b431dc6e2eb2327	0x3596f2f3be03991eafdd9f8e8ceb310cbdb72435	1.18e+17	0x	16112852	0x86dc1835ffeaa2400f2d60c970145d7ab4115784014d96b39910ef27f56849ad
34688	0x5ab75832c68248ba4cf525f3145eefdd5b8df0a988c6f7f32f5e332b3087a5de	0xcfc0ce815c457a5f02309e5fcb5ba640fea2900d	0x716fd7a421b7eeac5d5c658ddc824656e3e0f526	0	0x6a76120200000000000000000000000040a2accbd92bca938b02010e17a5b8929b49130d0000000000000000000000000000000000000000000000000000000000000000000000000000000000000000000000000000000000000000000000000000014000000000000000000000000000000000000000000000000000000000000000010000000000000000000000000000000000000000000000000000000000000000000000000000000000000000000000000000000000000000000000000000000000000…	16112852	0x86dc1835ffeaa2400f2d60c970145d7ab4115784014d96b39910ef27f56849ad
34689	0xa12ae1f700075cf54aff1918ce2c9cc6b4a87bacf6d42b34de28b9bd42a93883	0x77696bb39917c91a0c3908d577d5e322095425ca	0x33ed7b1cafb0a3b3f410a8363a9d49310e23c3ca	8720000000000000	0x	16112852	0x86dc1835ffeaa2400f2d60c970145d7ab4115784014d96b39910ef27f56849ad
34692	0x1e2cb8383c2b88a6e4f091660953cca3c1cf2f730a1733933a6404dbd0432981	0x21a31ee1afc51d94c2efccaa2092ad1028285549	0x7a7d87b7a1ac100d05d1a5ec081e70e4702a9d33	9030000000000000	0x	16112852	0x86dc1835ffeaa2400f2d60c970145d7ab4115784014d96b39910ef27f56849ad
34693	0xe4c3252a55d95254623d8a1d49222fb8c1bc2ba0ad886da4abe68e49da137361	0xf37d3c1c819fa6985be2e96898dbb2845a3d5f79	0xdac17f958d2ee523a2206206994597c13d831ec7	0	0xa9059cbb000000000000000000000000e5d72a6adea0c7ec1859bf634c56e5d80158d4360000000000000000000000000000000000000000000000000000000003168ed0	16112852	0x86dc1835ffeaa2400f2d60c970145d7ab4115784014d96b39910ef27f56849ad
34694	0x9f0c8f04d9bbd9b2d30fb7f786d9fa7361ec665bf864f41d3244ea941bf8b6f2	0x7f84e5c1b910b6cf82473bf0284622f6b219b888	0xe41bea6888f771a0c16d7188284522b76c135252	0	0xa22cb46500000000000000000000000000000000000111abe46ff893f3b2fdf1f759a8a80000000000000000000000000000000000000000000000000000000000000001	16112852	0x86dc1835ffeaa2400f2d60c970145d7ab4115784014d96b39910ef27f56849ad
34695	0x17504344e69a6d5dfa6155c75f784584283df2eb056f523c27105aac8c3c73e0	0x75e89d5979e4f6fba9f97c104c2f0afb3f1dcb88	0x349da281fa1a0638bea92b610f4236b558a5ffb7	3.55e+17	0x	16112852	0x86dc1835ffeaa2400f2d60c970145d7ab4115784014d96b39910ef27f56849ad
34696	0x55d0f91d0825b25ae3d090bab71f3b5fa483853c272abd64dfe0179e61c00fa2	0xcbd6832ebc203e49e2b771897067fce3c58575ac	0x99f63a3b4aa54ed501de5e3c5671b75bfa2887ea	1.59e+17	0x	16112852	0x86dc1835ffeaa2400f2d60c970145d7ab4115784014d96b39910ef27f56849ad
34698	0x966f6aa1df58f608ca96f055b598310b0a8389e3f1a3cbb6bfdbb1ea38a034d8	0xd659acc9ba0a7a55e17609cd4e26d0e52ecdd852	0x06450dee7fd2fb8e39061434babcfc05599a6fb8	0	0x9ff054df00000000000000000000000000000000000000000000000000000000000001af	16112852	0x86dc1835ffeaa2400f2d60c970145d7ab4115784014d96b39910ef27f56849ad
34699	0x8a7218c69f19de5e80e99c6954df8808bdd3a17ae58b05bd5061d93f5918f836	0x3cd751e6b0078be393132286c442345e5dc49699	0x0da7398b2c27fb0314908405895bb0b10c51cd0a	772000000000000	0x	16112852	0x86dc1835ffeaa2400f2d60c970145d7ab4115784014d96b39910ef27f56849ad
34700	0xa9f5bfd2d5e9adeb0f77a443ad4575c1e9dffb1ea89b9497075d5bea130f27b4	0x392d688249dda8c3f75402cc257307e04fcd793c	0x1111111254eeb25477b68fb85ed929f73a960582	0	0x12aa3caf00000000000000000000000053222470cdcfb8081c0e3a50fd106f0d69e63f200000000000000000000000002d2a4e03ab7619e81d8fc7145fb651b62479391f000000000000000000000000eeeeeeeeeeeeeeeeeeeeeeeeeeeeeeeeeeeeeeee000000000000000000000000b9b7f9d8a4a91c97aa2fdddfbe82ee502ac4b253000000000000000000000000392d688249dda8c3f75402cc257307e04fcd793c00000000000000000000000000000000000000000008f2fb9b233dbaccf72e1600000…	16112852	0x86dc1835ffeaa2400f2d60c970145d7ab4115784014d96b39910ef27f56849ad
34701	0xca65fde0b0f4776f462d8a286f49f0d00a042daca08057f02cfb002a5e2ad19f	0xb5d85cbf7cb3ee0d56b3bb207d5fc4b82f43f511	0x82fe4396d4ba1ad6acd7453a8f53577c5e6f36d1	8720000000000000	0x	16112852	0x86dc1835ffeaa2400f2d60c970145d7ab4115784014d96b39910ef27f56849ad
34702	0xb6e68f794c384fa74aa77c15e7f602d718cbd424432e1024ce4ae3d979d6b95a	0xd637243d78c95af3d30e9bd5199ec51c801c563a	0x39da41747a83aee658334415666f3ef92dd0d541	2200000000000000	0x9a2b811500000000000000000000000000000000000000000000000000000000000000200000000000000000000000000000000000000000000000000000000000000001000000000000000000000000000000000000000000000000000000000000002000000000000000000000000000000000000000000000000000000000000000040000000000000000000000000000000000000000000000000007d0e36a818000000000000000000000000000000000000000000000000000000000000000006000000…	16112852	0x86dc1835ffeaa2400f2d60c970145d7ab4115784014d96b39910ef27f56849ad
34703	0xb805af8dda7ae761bb65dd822e6d6158f38bf03249445295007d14765919796a	0xd026da4910b0f5a018b5d32cf654a6bb81c421a0	0x3f1d193884fd596e2b2110759f314118af410ced	0	0x23b872dd000000000000000000000000d026da4910b0f5a018b5d32cf654a6bb81c421a0000000000000000000000000107608a8b7a1af418f9aaa608fb92651c122e7c600000000000000000000000000000000000000000000000000000000000008c6	16112852	0x86dc1835ffeaa2400f2d60c970145d7ab4115784014d96b39910ef27f56849ad
34704	0xdd6fc4a8ced6abd8c65e5e277dd7f7aff1c4a718657e8348f3801702441e8671	0xe5a43b3d9c408ee7da43dca881d41912f885abb2	0x6a9f9d6f5d672a9784c5e560a9648de6cbe2c548	0	0x78c77a24000000000000000000000000000000000000000000000000cc00e41db63e0000	16112852	0x86dc1835ffeaa2400f2d60c970145d7ab4115784014d96b39910ef27f56849ad
34706	0x8ab26fb4d7a37aa59e4811463182d64512e2a0d5f522b0f179927936aa781154	0x3ca2070165b221fe655f27bfbbb814418d37844c	0xb5599f568d3f3e6113b286d010d2bca40a7745aa	0	0x8293e9af0000000000000000000000000f51bb10119727a7e5ea3538074fb341f56b09ad0000000000000000000000000000000000000000000000000038ada8fc9c2800	16112852	0x86dc1835ffeaa2400f2d60c970145d7ab4115784014d96b39910ef27f56849ad
34707	0x5d18c471dabb4d3f994f44313536a876bddb22f8b64b050da096d7936f69d7c5	0x7c195d981abfdc3ddecd2ca0fed0958430488e34	0xe7115e81d5b8685b11dc467523de7b1040d60fbc	1.95e+16	0x	16112852	0x86dc1835ffeaa2400f2d60c970145d7ab4115784014d96b39910ef27f56849ad
34710	0xbd598c090ec39cf5e512960dc71f2591bf22495c34bd842db120c5e2e577b4e7	0xcdd37ada79f589c15bd4f8fd2083dc88e34a2af2	0xc8fd0e30c664710eef2def6554095a584c811de0	1.78e+16	0x	16112852	0x86dc1835ffeaa2400f2d60c970145d7ab4115784014d96b39910ef27f56849ad
34711	0x0ecb61da02a263b957176e36659f6f76be0e5c2f2926631e092393501b6ec13a	0x5cf47b8c8518bcd32f91b6c4b5583a378c198b70	0xec611ac556b84557a84d3e45c639ce3c2b017f7c	5260000000000000	0x	16112852	0x86dc1835ffeaa2400f2d60c970145d7ab4115784014d96b39910ef27f56849ad
34713	0xb61fb7c7030c0f63aad43515936e0a44814db2179a0a87ba35dddf8d8c2eb4e5	0x06809fcd369de02a15b216c5f621e1eedebaa35a	0x283af0b28c62c092c9727f1ee09c02ca627eb7f5	0	0xf14fcbc8a27cbc1c960d934221947919f5b166c076f0649d92ebfe4dd2e2bfb60d8b61e9	16112852	0x86dc1835ffeaa2400f2d60c970145d7ab4115784014d96b39910ef27f56849ad
34714	0x3cdcc9f6711d9b6eea2e8c3d126dff66390dd3299e61a9ce5e9b892a3bb7a795	0xaa049d7a5eb8ef6dd57b58596ce6811458c0841a	0xae7ab96520de3a18e5e111b5eaab095312d7fe84	0	0x095ea7b30000000000000000000000001111111254eeb25477b68fb85ed929f73a960582ffffffffffffffffffffffffffffffffffffffffffffffffffffffffffffffff	16112852	0x86dc1835ffeaa2400f2d60c970145d7ab4115784014d96b39910ef27f56849ad
34716	0x376f1fe0b7f0906686781f1681c085bbd279608d32a2cbcd5e7e73f3e7b810f1	0x0971fcb069ecde4eb4a43325e46041aab73f5732	0x283af0b28c62c092c9727f1ee09c02ca627eb7f5	1.31e+16	0xf7a1696300000000000000000000000000000000000000000000000000000000000000c00000000000000000000000000971fcb069ecde4eb4a43325e46041aab73f57320000000000000000000000000000000000000000000000000000000005a4900811a5e3325ba7c21f23a2fd2e2e24ecb956424edf6e9655d577c566961f48ab7a0000000000000000000000004976fb03c32e5b8cfe2b6ccb31c09ba78ebaba410000000000000000000000000971fcb069ecde4eb4a43325e46041aab73f573200000…	16112852	0x86dc1835ffeaa2400f2d60c970145d7ab4115784014d96b39910ef27f56849ad
34717	0xf7df3610f453c7483dd8ad46c80eda644db66f57f36012de75e4acec2519fa43	0x650b208666c84274eafd002aae7035b7be37dbea	0x9d93e3006264e296d3992c2cce1c5d2ee32b579e	7.98e+16	0x	16112852	0x86dc1835ffeaa2400f2d60c970145d7ab4115784014d96b39910ef27f56849ad
34718	0x7cb3021a6eda049e25e63f9f6618d6c1a566ee11a51133bbb2ad5db11a564b75	0x56eddb7aa87536c09ccc2793473599fd21a8b17f	0x30ecc54c25325accea81b8b306d149299ffb549d	1.01e+17	0x	16112852	0x86dc1835ffeaa2400f2d60c970145d7ab4115784014d96b39910ef27f56849ad
34720	0x79a579fe1012fe43cd2f902fab74983f49216f81c9369570ca41acd906e89605	0x512fce9b07ce64590849115ee6b32fd40ec0f5f3	0x1111111254eeb25477b68fb85ed929f73a960582	0	0x12aa3caf00000000000000000000000053222470cdcfb8081c0e3a50fd106f0d69e63f20000000000000000000000000ac3e018457b222d93114458476f3e3416abbe38f000000000000000000000000eeeeeeeeeeeeeeeeeeeeeeeeeeeeeeeeeeeeeeee00000000000000000000000053222470cdcfb8081c0e3a50fd106f0d69e63f20000000000000000000000000512fce9b07ce64590849115ee6b32fd40ec0f5f30000000000000000000000000000000000000000000000025cb39ff64e5f160200000…	16112852	0x86dc1835ffeaa2400f2d60c970145d7ab4115784014d96b39910ef27f56849ad
34721	0x334d4fb26cd36f8b51520874d0cb9cc4b958005b9d79e3dee023489f66c5cad2	0xc4958aae90d4228ca2316f6e20d9c1f960e058ca	0x68b3465833fb72a70ecdf485e0e4c7bd8665fc45	0	0x5ae401dc00000000000000000000000000000000000000000000000000000000638cdbcf000000000000000000000000000000000000000000000000000000000000004000000000000000000000000000000000000000000000000000000000000000020000000000000000000000000000000000000000000000000000000000000040000000000000000000000000000000000000000000000000000000000000016000000000000000000000000000000000000000000000000000000000000000e4472b4…	16112852	0x86dc1835ffeaa2400f2d60c970145d7ab4115784014d96b39910ef27f56849ad
34723	0x8ad89b1c3cf0e22ec656038289732c82a49c81e25fd05ffb594544bab54355b5	0x3a68f546e9dfa7bfde624c456b25d44e0fbb9aef	0x55b916ce078ea594c10a874ba67ecc3d62e29822	0	0x9db4f7aa0000000000000000000000003432b6a60d23ca0dfca7761b7ab56459d9c964d0000000000000000000000000941eb6f616114e4ecaa85377945ea306002612fe000000000000000000000000eeeeeeeeeeeeeeeeeeeeeeeeeeeeeeeeeeeeeeee000000000000000000000000d51a44d3fae010294c616388b506acda1bfaae46000000000000000000000000dac17f958d2ee523a2206206994597c13d831ec7000000000000000000000000bebc44782c7db0a1a60cb6fe97d0b483032ff1c700000…	16112852	0x86dc1835ffeaa2400f2d60c970145d7ab4115784014d96b39910ef27f56849ad
34724	0xe78306da4157db547530a5317ff9ffe1664ff83e3a7b01817192b3e80573bac3	0x931c75b98b4e07c7680ef89758ba539808f0b148	0x881d40237659c251811cec9c364ef91dc08d300c	0	0x5f57552900000000000000000000000000000000000000000000000000000000000000800000000000000000000000001f9840a85d5af5bf1d1762f925bdaddc4201f984000000000000000000000000000000000000000000000000a933d01866c4526600000000000000000000000000000000000000000000000000000000000000c000000000000000000000000000000000000000000000000000000000000000136f6e65496e6368563446656544796e616d69630000000000000000000000000000000…	16112852	0x86dc1835ffeaa2400f2d60c970145d7ab4115784014d96b39910ef27f56849ad
34725	0xb4e51f577ac9958247cf9e6cd3d52f1f0e4409d3ee408a0936477a74ab4c16ea	0xcf9489a846d5d0b9fd871e2e5b30a97605dd33c1	0x68b3465833fb72a70ecdf485e0e4c7bd8665fc45	0	0x5ae401dc00000000000000000000000000000000000000000000000000000000638cdbdb000000000000000000000000000000000000000000000000000000000000004000000000000000000000000000000000000000000000000000000000000000020000000000000000000000000000000000000000000000000000000000000040000000000000000000000000000000000000000000000000000000000000016000000000000000000000000000000000000000000000000000000000000000e4472b4…	16112852	0x86dc1835ffeaa2400f2d60c970145d7ab4115784014d96b39910ef27f56849ad
34726	0x13ebccc59dd1e6ca0303023f812b3242c79ed5144b9644843cef2c0a735a3ad6	0xbdb945722952425b98ef7d9e994c7ce63b189b08	0xff1f2b4adb9df6fc8eafecdcbf96a2b351680455	5e+18	0x7ff48afb00000000000000000000000000000000000000000000000000000000000000000000000000000000000000000000000000000000000000004564902ad97d8000000000000000000000000000bdb945722952425b98ef7d9e994c7ce63b189b080000000000000000000000000000000000000000000000000000000000000000	16112852	0x86dc1835ffeaa2400f2d60c970145d7ab4115784014d96b39910ef27f56849ad
34727	0xccdb3f2c2a4a574503b5522bdba951e1172f829da42a4e8706f878b323c29c86	0xfd9f88a5eb53f12e1d35c51279d4a0f5244cf1db	0x7a250d5630b4cf539739df2c5dacb4c659f2488d	0	0x5c11d795000000000000000000000000000000000000000000000000003f12a9032545810000000000000000000000000000000000000000000000000042157eebc741d900000000000000000000000000000000000000000000000000000000000000a0000000000000000000000000fd9f88a5eb53f12e1d35c51279d4a0f5244cf1db00000000000000000000000000000000000000000000000000000000638cd5a5000000000000000000000000000000000000000000000000000000000000000200000…	16112852	0x86dc1835ffeaa2400f2d60c970145d7ab4115784014d96b39910ef27f56849ad
34728	0xf6efdc0b5200ac9ce4a7ec1d95ae0949f811404646de4e9d4727c9f72ebcca9c	0x3a7a1c811d3bb561181fa771006832fadcd01019	0xe0c38b2a8d09aad53f1c67734b9a95e43d5981c0	0	0x7c025200000000000000000000000000f65f4ab80491fb8db2ecd1ffc63e779261bf0b36000000000000000000000000000000000000000000000000000000000000006000000000000000000000000000000000000000000000000000000000000001800000000000000000000000004e3fbd56cd56c3e72c1403e103b45db9da5b9d2b000000000000000000000000a0b86991c6218b36c1d19d4a2e9eb0ce3606eb48000000000000000000000000f65f4ab80491fb8db2ecd1ffc63e779261bf0b3600000…	16112852	0x86dc1835ffeaa2400f2d60c970145d7ab4115784014d96b39910ef27f56849ad
34729	0x166dcaf08b8e01a7dc2f0fbdc789c37c2d5429b1a20518449c9fe81ba91df526	0xdafc75807e644d5a47f5f5acd09efaf1dd1434e3	0x0352086e5ce73fc2ec4c41fef56361f7def6ea91	0	0x7af5352f0000000000000000000000000000000000000000000000000000000000000020000000000000000000000000c02aaa39b223fe8d0a0e5c4f27ead9083c756cc20000000000000000000000000000000000000000000000000de0b6b3a76400000000000000000000000000000000000000000000000000000007cfce3467b6a100000000000000000000000000000000000000000000000000000000000493e000000000000000000000000000000000000000000000000000000000000000a000000…	16112852	0x86dc1835ffeaa2400f2d60c970145d7ab4115784014d96b39910ef27f56849ad
34730	0xc748e88068360f0bdd6e106e09191beec4b61420ddfe18b2fce0a4f48b0ab2dc	0x562b0d1d3ad331022842b39589d01cad924e12ef	0x4afd163f281ed126cb07eaf99f52d8a083e135e3	0	0x555c1cd500000000000000000000000000000000000000000000000000000000000000c000000000000000000000000000000000000000000000000000000000000006600000000000000000000000000000000000000000000000000000000000000700000000000000000000000000000000000000000000000000000000000000029e00000000000000000000000000000000000000000000000000000000638cda18000000000000000000000000000000000000000000000000000000000000078000000…	16112852	0x86dc1835ffeaa2400f2d60c970145d7ab4115784014d96b39910ef27f56849ad
34731	0xc1e1523106865628266b101350e888bc72c92937a03a773e66a94e2670dac91f	0xf60c2ea62edbfe808163751dd0d8693dcb30019c	0x5ace53d57df4bb709e93cc4f1b53175d1fb76289	9.92e+16	0x	16112852	0x86dc1835ffeaa2400f2d60c970145d7ab4115784014d96b39910ef27f56849ad
34734	0xbd333acd916ac910544b5e5ecc40bec67b7d91f529eb00e362b0cefb02a4f452	0x911788d9b77f277e0394f0cf0cb5073985a372c0	0x9ade9ea6fd4fca08e27db8d2b607e3e30bcb0ab2	0	0x1b91154700000000000000000000000000000000000000000000000000000000000006dd	16112852	0x86dc1835ffeaa2400f2d60c970145d7ab4115784014d96b39910ef27f56849ad
34735	0x9c20c23eb01f0af7d704333bc7758513cddcbe398bc4cf8355f8b60a3d57c771	0x35fd1a27e82962c9e9e59e40bdd3cad527079f0f	0x8b5f3c9d2df9e0d3c991d543325b342d1320e927	3.37e+16	0x	16112852	0x86dc1835ffeaa2400f2d60c970145d7ab4115784014d96b39910ef27f56849ad
34736	0x89611c7f91162a8a7346e124c31c92fe8681ed0a1f7f5793a0b931e79f5e368f	0x97b9d2102a9a65a26e1ee82d59e42d1b73b68689	0x759c3b3914f8f1d95a666110dae4a269343cb147	5.96e+17	0x	16112852	0x86dc1835ffeaa2400f2d60c970145d7ab4115784014d96b39910ef27f56849ad
34737	0x1ad89b63b7dae08a68b693666dde496fa90e4bb99fffc5d9addb55b4f15dc0df	0x5f028a8c6a792abaea40068b3bcba8f4307810da	0xf4d2888d29d722226fafa5d9b24f9164c092421e	0	0x095ea7b30000000000000000000000003ab16af1315dc6c95f83cbf522fecf98d00fd9baffffffffffffffffffffffffffffffffffffffffffffffffffffffffffffffff	16112852	0x86dc1835ffeaa2400f2d60c970145d7ab4115784014d96b39910ef27f56849ad
34738	0xfa990183eaffbace391780a420f6efd2c200a6a20407caa40b9d551c1fefad5a	0xcbcec9e316343fb78ad8ba5d42f0c737bc5310b0	0xac7bdc5ff416acc40bab68e93acccfd50cd52200	3050000000000000	0x	16112852	0x86dc1835ffeaa2400f2d60c970145d7ab4115784014d96b39910ef27f56849ad
34740	0x9fe1838195e7d52b4c4a79d60c071da1dc864cc8e9d8a2575c5ea40617172f91	0x4a7f18a8cc4acea30c16d4e719ce9c83a66962b1	0xc6dca8e9c9eb5a7eb68b04a69e63352d5d98695c	0	0x5b70ea9f	16112852	0x86dc1835ffeaa2400f2d60c970145d7ab4115784014d96b39910ef27f56849ad
34741	0x48994ad96d12e2813d9b17a7dcc9df81541508ba1972ff0c2c3c55bb90b30f30	0x912fd21d7a69678227fe6d08c64222db41477ba0	0xdac17f958d2ee523a2206206994597c13d831ec7	0	0xa9059cbb000000000000000000000000de85e39153284f84bcc6983c6a7d4668ba38de6f0000000000000000000000000000000000000000000000000000000000eafa69	16112852	0x86dc1835ffeaa2400f2d60c970145d7ab4115784014d96b39910ef27f56849ad
34742	0x9aae82ba4bba91d4222240a5a8c8a1d66c314959708d7c13534ae309b0d13c94	0x95a9bd206ae52c4ba8eecfc93d18eacdd41c88cc	0x8de885d42eb29c7ec29e735f672794cf22f59618	8720000000000000	0x	16112852	0x86dc1835ffeaa2400f2d60c970145d7ab4115784014d96b39910ef27f56849ad
34744	0x83dd3febe4d6d3ea45c16f63bf7de87dd38cf16fe779d9dfeab0138700384a23	0x8dc5567e4e8da85267b5d1bb7803dfbf2804c146	0x41fad93f225b5c1c95f2445a5d7fcb85ba46713f	0	0xa000aaa90000000000000000000000008dc5567e4e8da85267b5d1bb7803dfbf2804c14600000000000000000000000044474d98d1484c26e8d296a43a721998731cf77500000000000000000000000000000000000000000000022244bf13af244bf73100000000000000000000000000000000000000000000021f86024c3030fa89e400000000000000000000000000000000000000000000024076dba62398cba985000000000000000000000000000000000000000000000225037bdb2e179d647f00000…	16112852	0x86dc1835ffeaa2400f2d60c970145d7ab4115784014d96b39910ef27f56849ad
34747	0x07b4a394ed8a06492d6de1dd8e0a6e52a3cd30a1a4000e97e4dc8859e4c45de0	0x30a84c5e73db61f2965770d7e2a6e928667e025a	0x338d8368ba63f218fceb32cf142497a374babe32	5000000000000000	0x1249c58b	16112852	0x86dc1835ffeaa2400f2d60c970145d7ab4115784014d96b39910ef27f56849ad
34748	0x132de79a91604ae5747ae8461505a7aac62eada46b50c8f14f8c9bc0d906a733	0x1935eee38315738e649bdb170ba6e0236b96ca99	0x7371f0a8797227eef1278279d31e4f84db17493a	4.97e+16	0x	16112852	0x86dc1835ffeaa2400f2d60c970145d7ab4115784014d96b39910ef27f56849ad
34750	0x0ab72920ee36acad3e2f6eee66a5afb49491727a1efbe393fc1dafbb397609f6	0x75e89d5979e4f6fba9f97c104c2f0afb3f1dcb88	0x04fc4c365da72bbd2d13e4bc8eb1221664858051	0	0xa9059cbb000000000000000000000000a29704a0a6992c8f25dc3a0794bad7b33771d82d000000000000000000000000000000000000000000000007548df192e0520000	16112852	0x86dc1835ffeaa2400f2d60c970145d7ab4115784014d96b39910ef27f56849ad
34751	0x6c62e37094bc9f2ecf8d65375151bea13c6ed8340d6666d398c1a0b312150a02	0xb7836be54d9ca40c914a3844b9c30538679db45b	0x75cda57917e9f73705dc8bcf8a6b2f99adbdc5a5	0	0x2e4dbe8f000000000000000000000000000000000000000000000000000000000000254300000000000000000000000091eeda83433690056e22fe33f0e2ffc754ba107600000000000000000000000000000000000000000000000000000000043b8145000000000000000000000000000000000000000000000000000000000000254300000000000000000000000000000000000000000000000000000000000000a00000000000000000000000000000000000000000000000000000000000000041c3604…	16112852	0x86dc1835ffeaa2400f2d60c970145d7ab4115784014d96b39910ef27f56849ad
34752	0xb59db9b0d4dd6e48fd53e662f7187634dc702b1e23798d7844c4d8de8478f252	0x974caa59e49682cda0ad2bbe82983419a2ecc400	0x95ad61b0a150d79219dcf64e1e6cc01f0b64c4ce	0	0xa9059cbb000000000000000000000000cf5032f38a596f12c5194abf975ccf8262a06e5b00000000000000000000000000000000000000000002ad5baa75efd960000000	16112852	0x86dc1835ffeaa2400f2d60c970145d7ab4115784014d96b39910ef27f56849ad
34753	0x160345562b315d8d4bdc44ec71f7b8ff3804bd24688a0bdaa0790976c8fb6a93	0x85dd13f8a9ceaf0bf4ae3a014740ff545d407b4d	0x7a250d5630b4cf539739df2c5dacb4c659f2488d	0	0x791ac947000000000000000000000000000000000000000000000000003ab35fa3c3c800000000000000000000000000000000000000000000000000004e7f5914c0dc4f00000000000000000000000000000000000000000000000000000000000000a000000000000000000000000085dd13f8a9ceaf0bf4ae3a014740ff545d407b4d00000000000000000000000000000000000000000000000000000000638cd554000000000000000000000000000000000000000000000000000000000000000200000…	16112852	0x86dc1835ffeaa2400f2d60c970145d7ab4115784014d96b39910ef27f56849ad
34754	0x45bcfee3acdc55f5f1db9e3da68f50ea5971738659839664de408f991770e3ac	0xebd2ad9c50192bc7641a402fc201fce86569f5c0	0x68b3465833fb72a70ecdf485e0e4c7bd8665fc45	1.1e+16	0x5ae401dc00000000000000000000000000000000000000000000000000000000638cdbcf00000000000000000000000000000000000000000000000000000000000000400000000000000000000000000000000000000000000000000000000000000001000000000000000000000000000000000000000000000000000000000000002000000000000000000000000000000000000000000000000000000000000000e404e45aaf000000000000000000000000c02aaa39b223fe8d0a0e5c4f27ead9083c756…	16112852	0x86dc1835ffeaa2400f2d60c970145d7ab4115784014d96b39910ef27f56849ad
34755	0xd8907e422c665b4ebd814ed42e7f9896ba97d6bbaad1ce74e9837362a000af17	0x28c6c06298d514db089934071355e5743bf21d60	0x95ad61b0a150d79219dcf64e1e6cc01f0b64c4ce	0	0xa9059cbb000000000000000000000000823e61505e3764ffe86c3282d4aa991d6a49d88e000000000000000000000000000000000000000002a8373af61d0680404a0000	16112852	0x86dc1835ffeaa2400f2d60c970145d7ab4115784014d96b39910ef27f56849ad
34756	0x872785e9bdec18da15eeeef38a0b0f66d24e25bea146d664d550d0e0437497ed	0x1be210e7990eff6c07cb8cadcb9d077063ac3614	0x85954c9affb049fa4340cfc898ede6e931818e5e	2100000000000000	0x	16112852	0x86dc1835ffeaa2400f2d60c970145d7ab4115784014d96b39910ef27f56849ad
34757	0x5f09e9a3ab0fb4625354f814ba1027e58b41912ccd5399ad119b9254c1965839	0x1be210e7990eff6c07cb8cadcb9d077063ac3614	0x81e20f198fbe2ab427f15552a33ed0cd4e9d4150	2100000000000000	0x	16112852	0x86dc1835ffeaa2400f2d60c970145d7ab4115784014d96b39910ef27f56849ad
34758	0xc198e87a7978340e7ad78a0e2c25d458a09963ec494ae03f73c3fd6ca86c2ae0	0x5be3564e4d8ab304d732f8c80fe212fc1c82b7e3	0xa0b86991c6218b36c1d19d4a2e9eb0ce3606eb48	0	0xa9059cbb0000000000000000000000005b5a922e065a425ee7e9b70185ba563ef270afcd0000000000000000000000000000000000000000000000000000000020c8ce15	16112852	0x86dc1835ffeaa2400f2d60c970145d7ab4115784014d96b39910ef27f56849ad
34760	0x91684bcc2de644da1099eb539c353e07beb18d61c96607c4650fb134af3b2632	0x21a31ee1afc51d94c2efccaa2092ad1028285549	0x514910771af9ca656af840dff83e8264ecf986ca	0	0xa9059cbb000000000000000000000000a951f5bbe57d251c5035936caf92fda0c70cbdbd0000000000000000000000000000000000000000000000000f207539952d0000	16112852	0x86dc1835ffeaa2400f2d60c970145d7ab4115784014d96b39910ef27f56849ad
34761	0xec89473bed0535da4a93d6e5259ed385561549c006a93f6327ab29e2e0bf3a80	0x9696f59e4d72e237be84ffd425dcad154bf96976	0x60d6e5e1ef91300121dab81c2a9ed14a99381d31	1.7e+18	0x	16112852	0x86dc1835ffeaa2400f2d60c970145d7ab4115784014d96b39910ef27f56849ad
34762	0x85b891c91f27c7eb844313e93028ffa770eeac8440e2f0adfb3b1265e1761457	0xf129f20bd4f4374aa12d7c488addfd2009125aae	0x11831c3ff9d8231de8632ce10f59ed7fdc1c53c9	0	0x095ea7b300000000000000000000000068b3465833fb72a70ecdf485e0e4c7bd8665fc45ffffffffffffffffffffffffffffffffffffffffffffffffffffffffffffffff	16112852	0x86dc1835ffeaa2400f2d60c970145d7ab4115784014d96b39910ef27f56849ad
34764	0xfd7a337ac31c7ca188de1fe10d26427af5d874e8710897355122bad271e21115	0x71660c4005ba85c37ccec55d0c4493e66fe775d3	0xc259bf7fe839a9e2f81efd44f60b62286aba1d0a	8720000000000000	0x	16112852	0x86dc1835ffeaa2400f2d60c970145d7ab4115784014d96b39910ef27f56849ad
34765	0x04c8eab7e51bdff281c44985f6d308f7a7c3aa2a21c65b424fc284c189583f4a	0x8214afb98121e899ed870bdadb84e27b0fb3e573	0xf9ffb0c9d3a6f32a54e965882b7e85c77e3bfe74	0	0xa22cb4650000000000000000000000001e0049783f008a0085193e00003d00cd54003c710000000000000000000000000000000000000000000000000000000000000001	16112852	0x86dc1835ffeaa2400f2d60c970145d7ab4115784014d96b39910ef27f56849ad
34766	0xc33c32477ec0a9f32392b0a075da203c13fd90393ea9dcc6d88ce1b4ba1e501c	0x1be210e7990eff6c07cb8cadcb9d077063ac3614	0x2b4a1a09a643c59114485820c1bcd718e9c3a6c6	2100000000000000	0x	16112852	0x86dc1835ffeaa2400f2d60c970145d7ab4115784014d96b39910ef27f56849ad
34767	0xd46ccb933237d2e9acad2ad2acb7ff428b12b51020462c4aa3c7817a676b76b9	0x48c04ed5691981c42154c6167398f95e8f38a7ff	0x92d6c1e31e14520e676a687f0a93788b716beff5	0	0xa9059cbb000000000000000000000000a305fab8bda7e1638235b054889b3217441dd6450000000000000000000000000000000000000000000000068856bd1a48c08000	16112852	0x86dc1835ffeaa2400f2d60c970145d7ab4115784014d96b39910ef27f56849ad
34768	0xfb979eb374d6f5664269fe6549506059408a81a7834960f8bca62c59215c56d3	0x6cc5f688a315f3dc28a7781717a9a798a59fda7b	0xc0a4df35568f116c370e6a6a6022ceb908eeddac	0	0xa9059cbb000000000000000000000000589e6ad3880694a4050fa388289aad19aa2a18b100000000000000000000000000000000000000000000000000000004c6b28ebc	16112852	0x86dc1835ffeaa2400f2d60c970145d7ab4115784014d96b39910ef27f56849ad
34769	0x18b0d48b7ed6db489e39beaba02b8f2e49f11190a2462d71d2b06754ab34dfcd	0x931c75b98b4e07c7680ef89758ba539808f0b148	0x1f9840a85d5af5bf1d1762f925bdaddc4201f984	0	0x095ea7b3000000000000000000000000881d40237659c251811cec9c364ef91dc08d300cffffffffffffffffffffffffffffffffffffffffffffffffffffffffffffffff	16112852	0x86dc1835ffeaa2400f2d60c970145d7ab4115784014d96b39910ef27f56849ad
34770	0x9408e4b919bb79ddc24ff5398d8f60e5cae33885e9b2e8d732ebde82c4ebc086	0x7c195d981abfdc3ddecd2ca0fed0958430488e34	0x0da1a0cb81c1e4738de319b1dfab7b69c2b2c9d8	5e+18	0x	16112852	0x86dc1835ffeaa2400f2d60c970145d7ab4115784014d96b39910ef27f56849ad
34771	0xd473271a84e5dcdea45e046a52520bb08a71d91954e4e0ef4992163a3c13fd5d	0x3018018c44338b9728d02be12d632c6691e020d1	0xdac17f958d2ee523a2206206994597c13d831ec7	0	0x23b872dd0000000000000000000000007105b10b2063a96318a2b2a23a93e1dc3865f53e000000000000000000000000e9a7f2a3584187842e99db22315ee96086ee65760000000000000000000000000000000000000000000000000000000007fcad80	16112852	0x86dc1835ffeaa2400f2d60c970145d7ab4115784014d96b39910ef27f56849ad
34772	0x61e76caa9c0d73b89251bee110a87bac4fc86d22f0f3534b16f68ef216d47d7c	0x97dd176d709cd5fd69e5a52f6ce8e521fdaa374e	0xc6dca8e9c9eb5a7eb68b04a69e63352d5d98695c	0	0xa22cb4650000000000000000000000001e0049783f008a0085193e00003d00cd54003c710000000000000000000000000000000000000000000000000000000000000001	16112852	0x86dc1835ffeaa2400f2d60c970145d7ab4115784014d96b39910ef27f56849ad
34773	0xac888acfce900a6c0d7b093e2ca24b5282ab7d35cbf3d63fca942b22c468c7e5	0x77696bb39917c91a0c3908d577d5e322095425ca	0x4e46645d25b92f6904790415db5b42a13cef8ac7	8720000000000000	0x	16112852	0x86dc1835ffeaa2400f2d60c970145d7ab4115784014d96b39910ef27f56849ad
34774	0x84fab5a3e293c8c2b57df37a7cc96382293da2af50902b15565d37b3945ce96f	0xddfabcdc4d8ffc6d5beaf154f18b778f892a0740	0xc95103164afd56642685ab7fdaacb6b146113314	1.33e+16	0x	16112852	0x86dc1835ffeaa2400f2d60c970145d7ab4115784014d96b39910ef27f56849ad
34775	0xbf7fc368fac2dce0749d8e73c0c6096f426f999f3dc8ccbed2e733376e684083	0xdfd5293d8e347dfe59e90efd55b2956a1343963d	0x95ad61b0a150d79219dcf64e1e6cc01f0b64c4ce	0	0xa9059cbb000000000000000000000000afd1813636b3067537a1a1f1ec17d3d6b50f3db0000000000000000000000000000000000000000000094b1eeee7b8728b500000	16112852	0x86dc1835ffeaa2400f2d60c970145d7ab4115784014d96b39910ef27f56849ad
34776	0x9a84a5ea1c229497598b17b7ef81d2c41af85da0c5aed42301f11b786c8b6b8e	0x95a9bd206ae52c4ba8eecfc93d18eacdd41c88cc	0xae1bbc156776b0e36c863c3e0f6a5a0011fe4a0e	8720000000000000	0x	16112852	0x86dc1835ffeaa2400f2d60c970145d7ab4115784014d96b39910ef27f56849ad
34777	0xb9babd7248bd566c36d45ee72b047a03e9f87419a1b59674745e3954a1af9b9d	0x5e02de82fbf7e2008869be0b1c025fd0a63026be	0x1bbf25e71ec48b84d773809b4ba55b6f4be946fb	0	0x095ea7b30000000000000000000000007a250d5630b4cf539739df2c5dacb4c659f2488d00000000000000000000000000000000000000000000003627e8f712373c0000	16112852	0x86dc1835ffeaa2400f2d60c970145d7ab4115784014d96b39910ef27f56849ad
34778	0x587ae54692f10ddc589434df8dd9d1f95e13fd454bde02ced63119d207ac442f	0x1be210e7990eff6c07cb8cadcb9d077063ac3614	0x972f4278833a4dee11793cb9206b06952780562e	2100000000000000	0x	16112852	0x86dc1835ffeaa2400f2d60c970145d7ab4115784014d96b39910ef27f56849ad
34780	0x38fa6af61d765346690e7e04b785a224c30e0eacfc8f53ade4d3dd87a98f6058	0x95a9bd206ae52c4ba8eecfc93d18eacdd41c88cc	0x59080279c4274442550bd6701537a1312fabb6b7	2390000000000000	0x	16112852	0x86dc1835ffeaa2400f2d60c970145d7ab4115784014d96b39910ef27f56849ad
34781	0xcfe9a069cee2f960b229c4901a116b13f8d9e8a05ef758208cb9ae01b1832902	0x5fb1b08d6b6c5430bd8163b93f312d7ab4f17d16	0x9edf8cb34e9e8dc5aefdf037e738114458866e44	1590000000000000	0x	16112852	0x86dc1835ffeaa2400f2d60c970145d7ab4115784014d96b39910ef27f56849ad
34783	0xa15c1725612ad3ff8068cc43ef57741097e97b48612367334d118bf2bfa6c7e9	0xb739d0895772dbb71a89a3754a160269068f0d45	0x72b80a65bb9f3922ce0aa77b3b29d674e1a9a750	8720000000000000	0x	16112852	0x86dc1835ffeaa2400f2d60c970145d7ab4115784014d96b39910ef27f56849ad
34786	0x6d609b130e4807ba8d692de2a46253446276f3af39ac8147b771ba9d77c28c6a	0x685c99e8780e5a7f158617cc2e9acc0e45a66120	0x57f1887a8bf19b14fc0df6fd9b2acc9af147ea85	0	0x28ed4f6c5afbc217330ed2406972b5736331a09fbe66ad8c0b1392be8f2b4212b7a3b3680000000000000000000000006049c0e5c4ef4463dba8b80b6515195f7462c65e	16112852	0x86dc1835ffeaa2400f2d60c970145d7ab4115784014d96b39910ef27f56849ad
34788	0xa6881c501102692c2318f906d12b34df592d9f1472207a669371b0f036596383	0x4976a4a02f38326660d17bf34b431dc6e2eb2327	0x5a7de24b5ebcd780cb3a36c0c4600da3feff1c24	1.43e+17	0x	16112852	0x86dc1835ffeaa2400f2d60c970145d7ab4115784014d96b39910ef27f56849ad
34790	0xae9bd52330a1adb11f17b67e1267fd12957d86fc5bc80203ec713dc135791240	0x28c6c06298d514db089934071355e5743bf21d60	0xcb0c46b8c6331d01fa07a12f2f2d918fd3c661c3	7e+16	0x	16112852	0x86dc1835ffeaa2400f2d60c970145d7ab4115784014d96b39910ef27f56849ad
34791	0x8892bf3a1db133231cca05d4e722728a75459f0dd9227fc80a000e5414c0ffa2	0x4976a4a02f38326660d17bf34b431dc6e2eb2327	0x2e6e67907cefe51158f5a79f9a1b228321790750	1.11e+17	0x	16112852	0x86dc1835ffeaa2400f2d60c970145d7ab4115784014d96b39910ef27f56849ad
34793	0x4d756748838e7e7b45c1b5e8684b19b8451fa8ea06d2efe02ef1cb29fce951be	0x078c377f83b59124b17834dafb3cfb3d00b75654	0xdac17f958d2ee523a2206206994597c13d831ec7	0	0xa9059cbb00000000000000000000000057cb6ae5e6c89dd342afc0ff7730fd623a76a4e20000000000000000000000000000000000000000000000000000000004328620	16112852	0x86dc1835ffeaa2400f2d60c970145d7ab4115784014d96b39910ef27f56849ad
34794	0x512c17a49db41f9efe1e0c8a85a5af394c63225aea43e967cfe611637343279a	0xb739d0895772dbb71a89a3754a160269068f0d45	0x84ad2cf1656a8b6787935b7319a22e7a8ada9659	3.77e+16	0x	16112852	0x86dc1835ffeaa2400f2d60c970145d7ab4115784014d96b39910ef27f56849ad
34796	0xdf62304b0ebc2911774b6af99c56802386caf6b08afd47ba08ffbae6749e05a4	0x7c195d981abfdc3ddecd2ca0fed0958430488e34	0x8d4dc88aed2089cd800768904670783d8219f3bd	8720000000000000	0x	16112852	0x86dc1835ffeaa2400f2d60c970145d7ab4115784014d96b39910ef27f56849ad
34797	0x6801995b275b6c010832dd5fea10cc04575ec4cf4b3da5a0a3ac7d92ed7b387a	0x56e5718bcd9f831df387088637944f5e818afaeb	0x7a250d5630b4cf539739df2c5dacb4c659f2488d	0	0x791ac947000000000000000000000000000000000000000000000000000010121e12bc00000000000000000000000000000000000000000000000000000000000000000000000000000000000000000000000000000000000000000000000000000000a000000000000000000000000056e5718bcd9f831df387088637944f5e818afaeb00000000000000000000000000000000000000000000000000000000638cd72d000000000000000000000000000000000000000000000000000000000000000200000…	16112852	0x86dc1835ffeaa2400f2d60c970145d7ab4115784014d96b39910ef27f56849ad
34798	0x48ec13fb56616e6d77e88f75424c657bc1673c02d63e87f48a98a808077af046	0x9696f59e4d72e237be84ffd425dcad154bf96976	0x34a7d1033916fd8c1bf69366bc073677169c9ced	1.19e+17	0x	16112852	0x86dc1835ffeaa2400f2d60c970145d7ab4115784014d96b39910ef27f56849ad
34800	0x130caea0bce4721e764c159e0dbf150b9b79990834b871360b9f95fdef0c80cc	0x56eddb7aa87536c09ccc2793473599fd21a8b17f	0xb5bd802ac2b2a5b10ab625d531ca086b78c11428	5.99e+17	0x	16112852	0x86dc1835ffeaa2400f2d60c970145d7ab4115784014d96b39910ef27f56849ad
34801	0x091aaf63f85e633fb3d3c9c9808bc3b25080c6c584672f01e127b35c805f5043	0x3cd751e6b0078be393132286c442345e5dc49699	0x1ac38b20a410697772871c89ede818d249799478	2.78e+16	0x	16112852	0x86dc1835ffeaa2400f2d60c970145d7ab4115784014d96b39910ef27f56849ad
34802	0x8cd8ffd7c5f948becfd09c45e9ce3686126ae833623af46de2c16a8561ca166a	0x0acdd0fefb605957dfcba4816d77c43dec3f1f79	0x2706ceadfdb9d53b0346845e03a39d5b186943b8	3000000000000000	0x	16112852	0x86dc1835ffeaa2400f2d60c970145d7ab4115784014d96b39910ef27f56849ad
34803	0xf5727ef7857cbb97d257ced97122542958cdef0764c2d423cc0fc413490f2bdd	0x1be210e7990eff6c07cb8cadcb9d077063ac3614	0x0852a332812926cb4ddd71018001c22b8cb13ffc	2100000000000000	0x	16112852	0x86dc1835ffeaa2400f2d60c970145d7ab4115784014d96b39910ef27f56849ad
34804	0x6c2996dcc97c357dab62e96d695f972b499f1b4dec2b85957efdde7249abca29	0x28c6c06298d514db089934071355e5743bf21d60	0xdac17f958d2ee523a2206206994597c13d831ec7	0	0xa9059cbb000000000000000000000000dcafa8219b5aec18dd0fe4959efe7be60cfac5fa00000000000000000000000000000000000000000000000000000000065da380	16112852	0x86dc1835ffeaa2400f2d60c970145d7ab4115784014d96b39910ef27f56849ad
34805	0x2c6f419be18df64c2c9a23ec04061f1a7da67743d98d18f762819b423ca78a93	0xeb2629a2734e272bcc07bda959863f316f4bd4cf	0xddd74773bdd693e7f97a4701164191ffab317b7c	8720000000000000	0x	16112852	0x86dc1835ffeaa2400f2d60c970145d7ab4115784014d96b39910ef27f56849ad
34806	0xd7f5bb5c94c58506e9e301d238b611f5dcbd8d5d51bc6f032bcca12804677d5d	0xb5d85cbf7cb3ee0d56b3bb207d5fc4b82f43f511	0xc579a8dc3f71c00723ab7b92b0bf3ec73299888b	8720000000000000	0x	16112852	0x86dc1835ffeaa2400f2d60c970145d7ab4115784014d96b39910ef27f56849ad
34807	0x6f50f46574ffb4fb6be4063a0381c0534736412ffdc25bff68acf66cf7af2cad	0x3e684eeb280367fbb4e2b346dbe2820a7d0440f4	0x68b3465833fb72a70ecdf485e0e4c7bd8665fc45	0	0x5ae401dc00000000000000000000000000000000000000000000000000000000638cdbcf000000000000000000000000000000000000000000000000000000000000004000000000000000000000000000000000000000000000000000000000000000020000000000000000000000000000000000000000000000000000000000000040000000000000000000000000000000000000000000000000000000000000016000000000000000000000000000000000000000000000000000000000000000e4472b4…	16112852	0x86dc1835ffeaa2400f2d60c970145d7ab4115784014d96b39910ef27f56849ad
34808	0xa6504aa3198c4aff02ad7fd2d3f9be45e10fe0f75cbbfd50c39901767865100b	0x34b1372f7f960207d8bb68275f1c33311564c21a	0x0711a9767a41290d7f52714204618345c584f450	0	0xda7e7c500000000000000000000000000000000000000000000000000000000000000000000000000000000000000000000000000000000000000000000000000000004000000000000000000000000000000000000000000000000000000000000000103003f2432c3066d5ed9f74bc1cb2cf74f6f8293858ae17f9fac2bc64da7161cfc03e441bcfba3a6b7f1817c072eff0188ab355b8d26745f8cbe0119c454fd4500d6d5909900160825abeb0a444d2d290cb7ac7c3b258d2278a4b38b800c6b0502d182…	16112852	0x86dc1835ffeaa2400f2d60c970145d7ab4115784014d96b39910ef27f56849ad
34809	0x358b4715b569c3d11c63b4f340dc31c5bdffb6fe757c1517892ed55a604f6f19	0xc001889cd3d6c1dcfde8437191237b1ff4208268	0x79d57db00ffa5bf7503b2550c31c73253a40451a	0	0xa0712d680000000000000000000000000000000000000000000000000000000000000032	16112852	0x86dc1835ffeaa2400f2d60c970145d7ab4115784014d96b39910ef27f56849ad
34810	0x92549ecc95dd5a2d142c48e1c92a4fc7e5561685e330e10aeec6ba124ffc17cd	0x807986258d8b711d1b71b061361cde80161704c4	0x00000000006c3852cbef3e08e8df289169ede581	2.59e+17	0xfb0f3ee1000000000000000000000000000000000000000000000000000000000000002000000000000000000000000000000000000000000000000000000000000000000000000000000000000000000000000000000000000000000000000000000000000000000000000000000000000000000000000000000000033c23370924c0000000000000000000000000008c1f0d21eada6cd54fe0c56b8094b1283bbe0ea1000000000000000000000000004c00500000ad104d7dbd00e3ae0a5c00560c0000000…	16112852	0x86dc1835ffeaa2400f2d60c970145d7ab4115784014d96b39910ef27f56849ad
34812	0x15a4153985bfb5dc56ece4bb2246e0da50c00394557337c617abe5a114732d48	0xeb9d0e3ba530c03d0ca581d42406b51c628c7e61	0x68b3465833fb72a70ecdf485e0e4c7bd8665fc45	1e+18	0x5ae401dc00000000000000000000000000000000000000000000000000000000638cdbc300000000000000000000000000000000000000000000000000000000000000400000000000000000000000000000000000000000000000000000000000000001000000000000000000000000000000000000000000000000000000000000002000000000000000000000000000000000000000000000000000000000000000e4472b43f30000000000000000000000000000000000000000000000000de0b6b3a7640…	16112852	0x86dc1835ffeaa2400f2d60c970145d7ab4115784014d96b39910ef27f56849ad
34814	0xfc02bfd652812e3f40dfaca7b5dbe1f8b83011bd71398633d012565d82266104	0x7059ca50a39b0119f8d0eecba04809685974a3ea	0x68b3465833fb72a70ecdf485e0e4c7bd8665fc45	4.1e+17	0x5ae401dc00000000000000000000000000000000000000000000000000000000638cdbcf00000000000000000000000000000000000000000000000000000000000000400000000000000000000000000000000000000000000000000000000000000001000000000000000000000000000000000000000000000000000000000000002000000000000000000000000000000000000000000000000000000000000000e4472b43f300000000000000000000000000000000000000000000000005b09cd3e5e90…	16112852	0x86dc1835ffeaa2400f2d60c970145d7ab4115784014d96b39910ef27f56849ad
34815	0xce7d2f1eb77992a9746d287de925e5ef2f4381159319c1bca63cb2c9719738a3	0xcc6f17e3c8b0ac821812ec714471d310f4f0f917	0x0554f068365ed43dcc98dcd7fd7a8208a5638c72	0	0xc6760f6b000000000000000000000000000000000000000000000000000000000000006000000000000000000000000000000000000000000000000000000000000000a000000000000000000000000000000000000000000000000000000000000000e000000000000000000000000000000000000000000000000000000000000000010000000000000000000000000000000000000000000000000000000000000000000000000000000000000000000000000000000000000000000000000000000100000…	16112852	0x86dc1835ffeaa2400f2d60c970145d7ab4115784014d96b39910ef27f56849ad
34816	0xed6dfa19a7028bea0f105ca019e6a757ba05fe7b01549123255d3dbfdad31528	0xb038dd6cf5dfe8d357db742c6f1f3915c6bc01dd	0x881d40237659c251811cec9c364ef91dc08d300c	0	0x5f57552900000000000000000000000000000000000000000000000000000000000000800000000000000000000000006b3595068778dd592e39a122f4f5a5cf09c90fe2000000000000000000000000000000000000000000000001158e460913d0000000000000000000000000000000000000000000000000000000000000000000c000000000000000000000000000000000000000000000000000000000000000136f6e65496e6368563446656544796e616d69630000000000000000000000000000000…	16112852	0x86dc1835ffeaa2400f2d60c970145d7ab4115784014d96b39910ef27f56849ad
[truncated: 20,614 more rows]
