# Supplementary material for: Detection of malicious nodes based on consortium blockchain
Source: PeerJ Comput Sci. 2024 Jun 12;10:e2108. doi: 10.7717/peerj-cs.2108 (PMC11232615; doi:10.7717/peerj-cs.2108)
Supplement: Supplemental Information 4 — The node's transaction time, transaction address, and block number. [file peerj-cs-10-2108-s004.xlsx]

## Sheet: Sheet1
66668	0x3ff021f0b4755e7ab93acd6836b1e5d10005069c741fb9a3976e7e145b4d7705	0x1b5379aa858417d7982e17c2992c2188fbf9243b	0x67345114bab5da6ddad76628d77b1246cf79a11f	0	0x746796bd0000000000000000000000000000000000000000000000000000000000000020000000000000000000000000000000000000000000000000000000000000000200000000000000000000000000000000000000000000000000000000000003580000000000000000000000000000000000000000000000000000000000000359	16112654	0x8de424b8f9fc890bb37ec6a4ac99065fbe9650e858cb7b7aaff1cf57a297f0ae
66669	0x54eafafa448c8bf03c39da5aeef1e0246d01f08e15554b047ee3ef0361fa3fbd	0x747dbfbcfb74fd5fc115896c758a2fdff581c702	0x283af0b28c62c092c9727f1ee09c02ca627eb7f5	4360000000000000	0xf7a1696300000000000000000000000000000000000000000000000000000000000000c0000000000000000000000000747dbfbcfb74fd5fc115896c758a2fdff581c7020000000000000000000000000000000000000000000000000000000001e18558b8bd359eb76951240bb6509adb201829853aa8662a2071e934546a51a6d58efe0000000000000000000000004976fb03c32e5b8cfe2b6ccb31c09ba78ebaba41000000000000000000000000747dbfbcfb74fd5fc115896c758a2fdff581c70200000…	16112654	0x8de424b8f9fc890bb37ec6a4ac99065fbe9650e858cb7b7aaff1cf57a297f0ae
66670	0xd01fc9a974737054220ac0d001346ee9b66a7f4a7c8b456bc50fe3937a30a83b	0x68cc21f7c777243d1a9c71c2349bfdccd8ca7b78	0xe8c060f8052e07423f71d445277c61ac5138a2e5	0	0x02638ccb730023a9292830fc80db7f563edb28d2fe6fb47f86240100c76225124f3caab07f609b1d147a31de43926cd600b753428af26e81097e7fd17f40c88aaa3e04902cc02aaa39b223fe8d0a0e5c4f27ead9083c756cc200000000000000000000000000000000000000000000000000fd833fa20000000000000000000000000000000000000000000000000000001e6bfcb51281e7500000000000000000000000000000000000000000000000001e6bfcb51281e750000000000000000000000000000…	16112654	0x8de424b8f9fc890bb37ec6a4ac99065fbe9650e858cb7b7aaff1cf57a297f0ae
66672	0xc7c8b5adbc722c7d5bd1ac144623f5dbe22206e75501d64abbb791e750c8324e	0x68cc21f7c777243d1a9c71c2349bfdccd8ca7b78	0xe8c060f8052e07423f71d445277c61ac5138a2e5	0	0x03638ccb7300c76225124f3caab07f609b1d147a31de43926cd6010023a9292830fc80db7f563edb28d2fe6fb47f862400c02aaa39b223fe8d0a0e5c4f27ead9083c756cc2b753428af26e81097e7fd17f40c88aaa3e04902c000000000000000000000000000000000000000000000000027911a400000000000000000000000000000000000000000000000000000000528d8412417a8709000000000000000000000000000000000000000000000000528d8412417a8709000000000000000000000000000…	16112654	0x8de424b8f9fc890bb37ec6a4ac99065fbe9650e858cb7b7aaff1cf57a297f0ae
66673	0x6ad5a54911768bb03e25b78e1daaf625768868d54d061be263b5671db5198eb9	0xc4e22584fccc91daec2753e60a2c91317e57906e	0xa0b86991c6218b36c1d19d4a2e9eb0ce3606eb48	0	0xa9059cbb0000000000000000000000002bfccf606aba119c0a4ebac6cea7ca2f59f646ea000000000000000000000000000000000000000000000000000000000ee6b280	16112654	0x8de424b8f9fc890bb37ec6a4ac99065fbe9650e858cb7b7aaff1cf57a297f0ae
66674	0x97719a80ca427f0854acc1280142c5076da7b4b5a2932d1632a1e30943ba5eb5	0xbf2d5d8ebf05947245b3d7f38b2776a6a49710dd	0xbf2d5d8ebf05947245b3d7f38b2776a6a49710dd	44547	0x	16112654	0x8de424b8f9fc890bb37ec6a4ac99065fbe9650e858cb7b7aaff1cf57a297f0ae
66675	0x55e72f9599d06893253fe502d2f49e1b5ec2c6bf8f7e7c6691f6d9551ca52134	0xb18ccf69940177f3ec62920ddb2a08ef7cb16e8f	0xd249942f6d417cbfdcb792b1229353b66c790726	0	0xd4fae269000000000000000000000000e1573b9d29e2183b1af0e743dc2754979a40d237000000000000000000000000853d955acef822db058eb8505911ed77f175b99e0000000000000000000000000000000000000000000000c944d61df9dc1289f90000000000000000000000000000000000000000000000296cdc93b6761d58f0	16112654	0x8de424b8f9fc890bb37ec6a4ac99065fbe9650e858cb7b7aaff1cf57a297f0ae
66677	0x7121c52033e0dca07ae76cd77d0f5920a06d9f2a0b5de507e511fae91c442612	0x837a9901300312c86884902db2bfd343a93604dc	0xabeb2295f6c1857b76e41b760a8669ff0cddef91	0	0xe449f341000000000000000000000000000000000000000000000000000000000000002000000000000000000000000000000000000000000000000000000000000000010000000000000000000000000000000000000000000000000000000000000052	16112654	0x8de424b8f9fc890bb37ec6a4ac99065fbe9650e858cb7b7aaff1cf57a297f0ae
66678	0x5e2b8055df1abf648e9d1e20375785ce61e56ee2e6ca6235f4c9b1ccd019b199	0x09aa7bd101451c9e1d99764dbb4846cb08cdbc02	0x3007abcb4d88555f81cacb4f3ac4bf0b98245ec4	4950000000000000	0x	16112654	0x8de424b8f9fc890bb37ec6a4ac99065fbe9650e858cb7b7aaff1cf57a297f0ae
66680	0xcee6b69128a97b95880fafde60bf86fe10ebcd15eb27f604678a3d7de5f51b13	0xcaefd832536143e6c7985ca78f1e17fd0b05c4bf	0x084b1c3c81545d370f3634392de611caabff8148	0	0xc47f00270000000000000000000000000000000000000000000000000000000000000020000000000000000000000000000000000000000000000000000000000000000c697965727364656e2e6574680000000000000000000000000000000000000000	16112654	0x8de424b8f9fc890bb37ec6a4ac99065fbe9650e858cb7b7aaff1cf57a297f0ae
66681	0xa0e3ccb262b0f81ba304991eeab7ad4a07b838d7455513e863f70824b69b0b7d	0xb62aed303f62bef1bf9d2ed1aaaf0de853efc424	0xd4e53e3597a2ed999d37e974f1f36b15eb879bad	0	0xa22cb46500000000000000000000000000000000000111abe46ff893f3b2fdf1f759a8a80000000000000000000000000000000000000000000000000000000000000001	16112654	0x8de424b8f9fc890bb37ec6a4ac99065fbe9650e858cb7b7aaff1cf57a297f0ae
66683	0xd4998f26f16f43065aead38677519543f6b2352744efa5918cf8ffbd321b1e38	0xedcd6465f9d576fc1c374bed9d84e2bba569eded	0x5fdcca53617f4d2b9134b29090c87d01058e27e9	0	0x441a3e7003bad3b8fbd51cd13d55f4a5337165680a483ae31206baf415052f9c7449e26c016807a4e2986bc9d4c2c6a2fff6b2c6f351989c0f7a6d2164377848aac7c5d5	16112654	0x8de424b8f9fc890bb37ec6a4ac99065fbe9650e858cb7b7aaff1cf57a297f0ae
66684	0x0429ef4943272553f46856841b14ed5fc59ff6ffe1a5453b2e1f0953ad905788	0x11cc1de132a111ee430ed55c1c56673366428d57	0x06450dee7fd2fb8e39061434babcfc05599a6fb8	0	0x7b0472f000000000000000000000000000000000000000000001b3c8e140951231dc00000000000000000000000000000000000000000000000000000000000000000190	16112654	0x8de424b8f9fc890bb37ec6a4ac99065fbe9650e858cb7b7aaff1cf57a297f0ae
66685	0x9c621f61a0646d23a38eea18f65f18edecd3c008b2c66bab11408c99827ffa57	0xe53e05f1274bdbc305d5f9d85b95861d250f12bc	0x68b3465833fb72a70ecdf485e0e4c7bd8665fc45	0	0x5ae401dc00000000000000000000000000000000000000000000000000000000638cd24b000000000000000000000000000000000000000000000000000000000000004000000000000000000000000000000000000000000000000000000000000000020000000000000000000000000000000000000000000000000000000000000040000000000000000000000000000000000000000000000000000000000000016000000000000000000000000000000000000000000000000000000000000000e4472b4…	16112654	0x8de424b8f9fc890bb37ec6a4ac99065fbe9650e858cb7b7aaff1cf57a297f0ae
66687	0x6cf944e046170d62c5e53905fa4e6633dfa7489f8990e8b07e27976cd3766449	0x6d66418c477640aff369a3983a51443f6c39216d	0xcbd6832ebc203e49e2b771897067fce3c58575ac	2.36e+17	0x	16112654	0x8de424b8f9fc890bb37ec6a4ac99065fbe9650e858cb7b7aaff1cf57a297f0ae
66688	0x667e2fa0dcda32b89d8c602c763ada17a0d9454908d019ab082d72ef5dc5fae6	0x5041ed759dd4afc3a72b8192c143f72f4724081a	0xdac17f958d2ee523a2206206994597c13d831ec7	0	0xa9059cbb000000000000000000000000d8d6ffe342210057bf4dcc31da28d006f253cef0000000000000000000000000000000000000000000000000000000037de2e46c	16112654	0x8de424b8f9fc890bb37ec6a4ac99065fbe9650e858cb7b7aaff1cf57a297f0ae
66690	0x3b46f4d6fe5d63dfd7d527cbaa5a1ea78d32215fe34d059eeb57445a37d37f86	0x5237eb109c66125c63907b91ac1473df8a4768b6	0x69af81e73a73b40adf4f3d4223cd9b1ece623074	0	0xa9059cbb000000000000000000000000d6f4ae1476eb17e29344cdcd490907f11f5facb8000000000000000000000000000000000000000000000000b2667aa8626c0400	16112654	0x8de424b8f9fc890bb37ec6a4ac99065fbe9650e858cb7b7aaff1cf57a297f0ae
66691	0xb62e4d47d81baa3a5fafa5e4c58e46eb0bb0c3b00bb7abe7c108a68161107808	0x9fd491c9b35863849e546201e4df8b37b99b2ad0	0x00000000006c3852cbef3e08e8df289169ede581	0	0xe7acab24000000000000000000000000000000000000000000000000000000000000008000000000000000000000000000000000000000000000000000000000000006600000007b02230091a7ed01230072f7006a004d60a8d4e71d599b8104250f0000000000000000000000000000000000000000000000000000000000000000000000000000000000000000000000000000000000000000000000000000000000a0000000000000000000000000000000000000000000000000000000000000000100000…	16112654	0x8de424b8f9fc890bb37ec6a4ac99065fbe9650e858cb7b7aaff1cf57a297f0ae
66693	0xd141af5f1cef75695e8c8e8abab7d2c9d83466c127a3c9237b5732ccd7a6a60a	0x0758e77def8db3e078dd579a2e686a4543e5d6eb	0xeeeec6476073778077b40a73fe32e23a9876cab4	7.91e+16	0x2b66d72e000000000000000000000000000000000000000000000000000000000000002000000000000000000000000000000000000000000000000000000000000000ee65794a68624763694f694a46557a49314e694973496d74705a434936496a64684e6a526c5a6d51314c544a694e4463744e475a6a5a6931684f4463784c5445785a6d59354f5451345954646a4f434a392e436763784d6a597a4c6a513345674e56553051614a4759314d54646d4f5441314c5459794e5459744e474e6a597931684f5…	16112654	0x8de424b8f9fc890bb37ec6a4ac99065fbe9650e858cb7b7aaff1cf57a297f0ae
66696	0x2daafb15a2652b855a074f9b1820227db9297db6460cc8954bd7df8add5b6306	0x6cc5f688a315f3dc28a7781717a9a798a59fda7b	0x27c70cd1946795b66be9d954418546998b546634	0	0xa9059cbb0000000000000000000000007ab925d5210b0e0edfbe1bc2f24390d342f76a340000000000000000000000000000000000000000000000000dbb0e0ed4c58000	16112654	0x8de424b8f9fc890bb37ec6a4ac99065fbe9650e858cb7b7aaff1cf57a297f0ae
66697	0xe36fdefb32a85dfbf074c14c4c6851fdd3b2269f105dec0ccdc84aa045527a6f	0x98db3a41bf8bf4ded2c92a84ec0705689ddeef8b	0xd4382ff2b7d3966a3aee55abba01653894c82260	4.47e+16	0x	16112654	0x8de424b8f9fc890bb37ec6a4ac99065fbe9650e858cb7b7aaff1cf57a297f0ae
66698	0x105ac470ee6c886f4bdf853015a18c2048c7cc22825341eaadb694562f69c4db	0x428ab2ba90eba0a4be7af34c9ac451ab061ac010	0x4d9079bb4165aeb4084c526a32695dcfd2f77381	0	0xac9650d8000000000000000000000000000000000000000000000000000000000000002000000000000000000000000000000000000000000000000000000000000000010000000000000000000000000000000000000000000000000000000000000020000000000000000000000000000000000000000000000000000000000000014489a153cc000000000000000000000000eb03440702bb6de23c63ad1c5a24598433f59f8600000000000000000000000023690d5be941fdf2573fad8cfec3fdef26805…	16112654	0x8de424b8f9fc890bb37ec6a4ac99065fbe9650e858cb7b7aaff1cf57a297f0ae
66701	0x9f71a9ed76cb1ca0dcf173699cd21261b579d5be4b6e7ba99188b337769c375c	0x49545c4cbf5a385845cb164b540b35c05a6f4c43	0x3845badade8e6dff049820680d1f14bd3903a5d0	0	0xa9059cbb0000000000000000000000000ec1c654950203d56d60b26f6f889c572b4d0f620000000000000000000000000000000000000000000000001bc16d674ec80000	16112654	0x8de424b8f9fc890bb37ec6a4ac99065fbe9650e858cb7b7aaff1cf57a297f0ae
66703	0xafcbe05eb676db4df242ed716af2d7abbfe3ab99225a6c266da464cd54eb003b	0x28c6c06298d514db089934071355e5743bf21d60	0x4d224452801aced8b2f0aebe155379bb5d594381	0	0xa9059cbb000000000000000000000000d7da98a832836777690bf64f9de377287a9876ad0000000000000000000000000000000000000000000000024a0de186ccbfd400	16112654	0x8de424b8f9fc890bb37ec6a4ac99065fbe9650e858cb7b7aaff1cf57a297f0ae
66705	0xee7b6aafe8252122235d91c204eb21534ae4fec57cd4c2904538a7f8fa2c323e	0x077f6053a90449f43d28c38e00123829b1f4dfac	0x0087bb802d9c0e343f00510000729031ce00bf27	0	0x1e1326a30000000000000000000000004585fe77225b41b697c938b018e2ac67ac5a20c0000000000000000000000000000000000000000000000003341c8e4a935ee000000000000000000000000000000000000000000000000000000000001a26d7430000000000000000000000000000000000000000000000000000000000000000	16112654	0x8de424b8f9fc890bb37ec6a4ac99065fbe9650e858cb7b7aaff1cf57a297f0ae
66707	0xaf2f26a926af42419fb4d37c9c8326788d769e4cf2933f652e79685f2a40679e	0xb77d4bf7e8e4b67232ee54d387cf9736b97b7052	0x76f4eed9fe41262669d0250b2a97db79712ad855	0	0xf17a454600000000000000000000000000000000000000000000000000000000000000c000000000000000000000000000000000000000000000000000000000000001a000000000000000000000000000000000000000000000000000000017532890d900000000000000000000000000000000000000000000000000000017531947970000000000000000000000001d64fb0ffa8362b2e1ee7ee03929159551eab26e000000000000000000000000000000000000000000000000000000000000022000000…	16112654	0x8de424b8f9fc890bb37ec6a4ac99065fbe9650e858cb7b7aaff1cf57a297f0ae
66709	0x3baf9849a5733244687036402e2468ffb5cbd00457e085250e37c86bf8a28af8	0xea9c95aedf973657b19e1a112bf47cbaa1eafaf5	0x4f952c4c5415b2609899abdc2f8f352f600d14d6	48000000000000	0xdeecfbc9000000000000000000000000b03670c20f87f2169a7c4ebe35746007e9575901000000000000000000000000ea9c95aedf973657b19e1a112bf47cbaa1eafaf50000000000000000000000000000000000000000000000000000000000000000	16112654	0x8de424b8f9fc890bb37ec6a4ac99065fbe9650e858cb7b7aaff1cf57a297f0ae
66711	0x0db9fc6a1de9756e232fbea1e284f25b6b651c8d2665f4e557ec202b1420ce74	0x91aa0c856fb04b62ee2de38c1932195c6982f2cb	0xf4f1e0b0b93b7b2b7b6992b99f2a1678b07cd70c	0	0x3db2176f000000000000000000000000000000000000000000000000000000000000000100000000000000000000000000000000000000000000000ad747ae75e69e000000000000000000000000000091aa0c856fb04b62ee2de38c1932195c6982f2cb000000000000000000000000000000000000000000000000000000000000000000000000000000000000000000000000000000000000000000000000638e1ce3000000000000000000000000000000000000000000000000000000000000001b9eb47…	16112654	0x8de424b8f9fc890bb37ec6a4ac99065fbe9650e858cb7b7aaff1cf57a297f0ae
66715	0x8e258f30beb8b440448b7bfa1aac1845e91ceb303e1b64f9e74206c2fe37e476	0x85b44a83bca937e844bdc290284ef6b11bc015ba	0x3835a58ca93cdb5f912519ad366826ac9a752510	0	0x6e553f65000000000000000000000000000000000000000000002d565922cee3609428d500000000000000000000000085b44a83bca937e844bdc290284ef6b11bc015ba	16112654	0x8de424b8f9fc890bb37ec6a4ac99065fbe9650e858cb7b7aaff1cf57a297f0ae
66719	0xcb9baaa9666952cc3587eb12d275a0801f7bb0abedd24d237be1d25663b3146a	0xfeb1797e4f6fc613e556eb62724e29a08c5ca2d9	0xaf77af48e73e8f087a8478ef31dcc7f7f0752822	0	0xa22cb46500000000000000000000000000000000000111abe46ff893f3b2fdf1f759a8a80000000000000000000000000000000000000000000000000000000000000001	16112654	0x8de424b8f9fc890bb37ec6a4ac99065fbe9650e858cb7b7aaff1cf57a297f0ae
66721	0x71d7d1ddd2b14e1a12ef5f9cbdb4e4bb7ec3099b02c2539d9ff76f831e135d9b	0x9afacff5c0cc98c5a3d8771cc7230b42ddd42c04	0xba128064634067733bab47ae08e20d3c6fe9b33b	8.99e+17	0x	16112654	0x8de424b8f9fc890bb37ec6a4ac99065fbe9650e858cb7b7aaff1cf57a297f0ae
66722	0xa37175401ec9d7c8181fa1920133514b5229aae873b518ed97b95f87bca63f8f	0x46340b20830761efd32832a74d7169b29feb9758	0x22aa6d174d3ce3379db1ea8ffe051e3895ea2792	3.9e+16	0x	16112654	0x8de424b8f9fc890bb37ec6a4ac99065fbe9650e858cb7b7aaff1cf57a297f0ae
66724	0xb801f502ddbb71792331046679be0a1a4f4fb3c1ccad2eadb9f6d295fd29fa51	0xff82bf5238637b7e5e345888bab9cd99f5ebe331	0xa69babef1ca67a37ffaf7a485dfff3382056e78c	14595	0x1cff79cd000000000000000000000000a341dcee3e6e1302072fc1fd22a796df3f4ef2c5000000000000000000000000000000000000000000000000000000000000004000000000000000000000000000000000000000000000000000000000000000c402d489830000000000000000000000000000000000000000000000006777091e41a7a49d000000000000000000000000000000000000000ff419941b965d80000000000000000000000000000000000000000000000000000732e81b6652e754a93f8…	16112654	0x8de424b8f9fc890bb37ec6a4ac99065fbe9650e858cb7b7aaff1cf57a297f0ae
66725	0x15871faacfd15746a0986c91e97d2db0bd2a99ba5dc8ca29c9d65142f197f301	0x783386432184f46ff2e95da938f422f0fa0cb581	0x68b3465833fb72a70ecdf485e0e4c7bd8665fc45	2.5e+17	0x5ae401dc00000000000000000000000000000000000000000000000000000000638cd26300000000000000000000000000000000000000000000000000000000000000400000000000000000000000000000000000000000000000000000000000000001000000000000000000000000000000000000000000000000000000000000002000000000000000000000000000000000000000000000000000000000000000e4472b43f300000000000000000000000000000000000000000000000003782dace9d90…	16112654	0x8de424b8f9fc890bb37ec6a4ac99065fbe9650e858cb7b7aaff1cf57a297f0ae
66726	0x2267614554bd5a7c492d759657bf8c0215c717778f9f206fe4a69fd692637faa	0xc241b1ee1a167364d9d85c0c435c15e07678ffc9	0x684e4ed51d350b4d76a3a07864df572d24e6dc4c	0	0xa22cb46500000000000000000000000000000000000111abe46ff893f3b2fdf1f759a8a80000000000000000000000000000000000000000000000000000000000000001	16112654	0x8de424b8f9fc890bb37ec6a4ac99065fbe9650e858cb7b7aaff1cf57a297f0ae
66727	0xd7c9816e9d8ca2c0c33143b1eba5c8feceab45758155c0d8c0a099d6aa181874	0x5f0983341576068aabd04840fd0090718938cdec	0x5bce9c2edf7d692fffffb417673e7dd7b931dc4b	7.82e+17	0x	16112654	0x8de424b8f9fc890bb37ec6a4ac99065fbe9650e858cb7b7aaff1cf57a297f0ae
66729	0x9921ddc737629da57891b99f0d1703c0d980d2b0ba0189e9c718a0466438cc5b	0xb3c78f19874cad71663a616855efbf2c12197541	0x14da7b27b2e0fedefe0a664118b0c9bc68e2e9af	0	0x095ea7b3000000000000000000000000881d40237659c251811cec9c364ef91dc08d300cffffffffffffffffffffffffffffffffffffffffffffffffffffffffffffffff	16112654	0x8de424b8f9fc890bb37ec6a4ac99065fbe9650e858cb7b7aaff1cf57a297f0ae
66730	0x28f711669a31d2fdb685544af6eb8ca93270df5b1b1acb1b1c48c43e323a2d5c	0xed0b1c3bd94bdca062b5b69642646994fd43ff11	0x7458dbe322b4ef0fbf14fb541f4f873244d9e6da	3500000000000000	0x	16112654	0x8de424b8f9fc890bb37ec6a4ac99065fbe9650e858cb7b7aaff1cf57a297f0ae
66731	0x71ca8db0cf883b28f7ddbe2085e4b3f18baa398d287a33f7e3f47e7a23432047	0x4b47052498d469ac9521606a67d6f02afeb0985a	0xb6728bff344e2109dbb3a0c153cad65ec4bdb736	2000000000000000	0x38926b6de734f67ab0832b986d4105e15c799d86567f1c1900000000000000000000006e0000000000000000000000000000000000000000000000000000000000000040000000000000000000000000000000000000000000000000000000000000004119e21dfbdacf189b61d7ce2836b85a9057e01706565d7e96411fb22dd773cc2819c59c8aede7c8d99bb5d21494f1106ca5a5c2b44646900ff016f758c4a950801b00000000000000000000000000000000000000000000000000000000000000	16112654	0x8de424b8f9fc890bb37ec6a4ac99065fbe9650e858cb7b7aaff1cf57a297f0ae
66732	0xc6b501385fa17ee7bf985327f802ccc36741af3f8a4feca3c7fbc8eab91afd14	0xf0475a1f184f062d1eee88f0d79ec4eb2795d4f0	0x81153f0889ab398c4acb42cb58b565a5392bba95	0	0x08bbb82400000000000000000000000000000000000000000000000000000000000000000000000000000000000000008305cda6ae133e5ced575dd6806234f328a1b572f44d938600000000000000000000000000000000000000000000000004cee2300e818687000000000000000000000000d13cfd3133239a3c73a9e535a5c4dadee36b395c000000000000000000000000af95d3a7a25f831dc2b9a6704554435957b51ec20000000000000000000000000000000000000000000000000000000000000…	16112654	0x8de424b8f9fc890bb37ec6a4ac99065fbe9650e858cb7b7aaff1cf57a297f0ae
66733	0x4a75fdb04cb3ef88adaf7490d63e5665896ee3213cae3c1a731a1e1157a63548	0x9723b6d608d4841eb4ab131687a5d4764eb30138	0xdac17f958d2ee523a2206206994597c13d831ec7	0	0xa9059cbb000000000000000000000000cedf94801edd464fa8ba6d636a1e482a7ed337000000000000000000000000000000000000000000000000000000000003936e64	16112654	0x8de424b8f9fc890bb37ec6a4ac99065fbe9650e858cb7b7aaff1cf57a297f0ae
66734	0xd215364400d54f63f85a146094f30f9d1fd97bfe56535f7075a1f1cdef0c3350	0xf60c2ea62edbfe808163751dd0d8693dcb30019c	0x514910771af9ca656af840dff83e8264ecf986ca	0	0xa9059cbb0000000000000000000000003ca6fec2bf34128685171448a401244caa8f701200000000000000000000000000000000000000000000000085b2d7f4f61d0000	16112654	0x8de424b8f9fc890bb37ec6a4ac99065fbe9650e858cb7b7aaff1cf57a297f0ae
66735	0xc058cd3205b92186e286d95df90bc5aa345865d6be739f974eabf1dfa2f78103	0x5d983b5a96d5d0d6140ec0baaa2c9da7ff4ca4c3	0x9507c04b10486547584c37bcbd931b2a4fee9a41	16112654	0x3300000000008a7968bbb5897173000002abe438205a0f68f8d1020101f4ff000060594a405d53811d3bc4766596efd80fd545a2706b175474e89094c44da98b954eedeac495271d0fc02aaa39b223fe8d0a0e5c4f27ead9083c756cc203	16112654	0x8de424b8f9fc890bb37ec6a4ac99065fbe9650e858cb7b7aaff1cf57a297f0ae
66736	0x2f96c1f5ca0b573fb647af44a3671bbd17a87707177cd799b53a38466165f016	0x9b4835039a720f9b3b786454fc50cc2629866d55	0x230c4d2ab9deff6916d9a1fd5c36166fc3c4d3df	4.53e+16	0x	16112654	0x8de424b8f9fc890bb37ec6a4ac99065fbe9650e858cb7b7aaff1cf57a297f0ae
66737	0x894fc96f5b1a5888a8d74620f7d6d04bb8739d42741136ca2124699024333d10	0x440bb82df426cfc0276420ce2f365dd1866d9c5d	0xc18360217d8f7ab5e7c516566761ea12ce7f9d72	0	0x5c19a95c000000000000000000000000839395e20bbb182fa440d08f850e6c7a8f6f0780	16112654	0x8de424b8f9fc890bb37ec6a4ac99065fbe9650e858cb7b7aaff1cf57a297f0ae
66739	0x1d9d50eab0533797528d0e0522d25f7d4115d673d555fe3a2b7c3a45288e8383	0x46340b20830761efd32832a74d7169b29feb9758	0x45af36ce36908d246edba75291c7354fc082d44b	4.06e+17	0x	16112654	0x8de424b8f9fc890bb37ec6a4ac99065fbe9650e858cb7b7aaff1cf57a297f0ae
66742	0x25adec3f74ef8e823e03a070e30ee9a18d8c749d65e793f214dbb7c2ffdb2b40	0x9e9cdf941ec7dd71f187515860b6ff68cfb6e2a9	0x4a220e6096b25eadb88358cb44068a3248254675	0	0xa9059cbb0000000000000000000000000e19294dab6c26920ef99ed4516227d3a95693750000000000000000000000000000000000000000000000015af1d78b58c40000	16112654	0x8de424b8f9fc890bb37ec6a4ac99065fbe9650e858cb7b7aaff1cf57a297f0ae
66744	0x7fb152ecc06c884771e2d3174e75385e6ea912cb17e05e8a35b7b83918486791	0xefbd869f9468342d0921c7a9912a761b34cead6e	0x4e5b2e1dc63f6b91cb6cd759936495434c7e972f	2920000000000000	0x	16112654	0x8de424b8f9fc890bb37ec6a4ac99065fbe9650e858cb7b7aaff1cf57a297f0ae
66745	0xc2914dab2e707406cf99d69a0b7eccc4a64960af9adf383f24aa49c7be5648fd	0xaab27b150451726ec7738aa1d0a94505c8729bd1	0xe94f1fa4f27d9d288ffea234bb62e1fbc086ca0c	4.21e+16	0x	16112654	0x8de424b8f9fc890bb37ec6a4ac99065fbe9650e858cb7b7aaff1cf57a297f0ae
66746	0x3399cfac4f4a8c4a3193c1db5a35fd1c7ebcc5b1c4431642da214dbb013687a7	0x46340b20830761efd32832a74d7169b29feb9758	0xf2ff0627e441307d15abb79e38084d2718922450	2.29e+16	0x	16112654	0x8de424b8f9fc890bb37ec6a4ac99065fbe9650e858cb7b7aaff1cf57a297f0ae
66747	0xa7e7ddf4f5db70aa5093dae303a696ad34fd68527badcfe7d9e0baed0a5898a8	0xd54e4f8a55247487dd7c8c59f14ee5c0c2889477	0xa0c68c638235ee32657e8f720a23cec1bfc77c77	0	0xe3dec8fb000000000000000000000000d54e4f8a55247487dd7c8c59f14ee5c0c2889477000000000000000000000000b72a91ac402eec1977a6b2bd02d3f0aa1a261b9300000000000000000000000000000000000000000000000000000000000000600000000000000000000000000000000000000000000000000000000000000020000000000000000000000000000000000000000000000020b0fca4fa0d308164	16112654	0x8de424b8f9fc890bb37ec6a4ac99065fbe9650e858cb7b7aaff1cf57a297f0ae
66748	0x353746ac16570d44766fd00e35bc56c76db67289c6be82fcc8e1418a1ef74b01	0x00a336211fbfba4c644ee12ff59a206ede4823fb	0x8252df1d8b29057d1afe3062bf5a64d503152bc8	0	0x56efe98c000000000000000000000000000000000000000000000000bb59a27953c60000000000000000000000000000000000000000000000000000c62111ec388e800000000000000000000000000000000000000000000000000000000000000009ed000000000000000000000000ba30e5f9bb24caa003e9f2f0497ad287fdf956230000000000000000000000000000000000000000000000000000000000278d0000000000000000000000000000000000000000000000000000000000000001f400000…	16112654	0x8de424b8f9fc890bb37ec6a4ac99065fbe9650e858cb7b7aaff1cf57a297f0ae
66751	0x67349458ed81c71a0da83099b38e4515ab5045d305991bec73dde5fe38e345e1	0xbed76944dbe64e253f330cbc041e7240372d7000	0xc36442b4a4522e871399cd717abdd847ab11fe88	0	0xac9650d8000000000000000000000000000000000000000000000000000000000000002000000000000000000000000000000000000000000000000000000000000000020000000000000000000000000000000000000000000000000000000000000040000000000000000000000000000000000000000000000000000000000000012000000000000000000000000000000000000000000000000000000000000000a40c49ccbe000000000000000000000000000000000000000000000000000000000005c…	16112654	0x8de424b8f9fc890bb37ec6a4ac99065fbe9650e858cb7b7aaff1cf57a297f0ae
66752	0x10a11f49231c5f370dcc426b89574ec2a39c878647f977a6370e4db7ee9000c7	0x80c67432656d59144ceff962e8faf8926599bcf8	0x6bf80db9e7cb47dab0f09aea8b4ba7fb4837c520	2.94e+17	0x	16112654	0x8de424b8f9fc890bb37ec6a4ac99065fbe9650e858cb7b7aaff1cf57a297f0ae
66756	0xe7fc34a971d4115558216308f0bfe3d52270ba76a5c809b40278ea427e31fe56	0xfa6e906dd9084d50be4b0e6ac13ef5b7186362e2	0x76f4eed9fe41262669d0250b2a97db79712ad855	0	0xf17a454600000000000000000000000000000000000000000000000000000000000000c000000000000000000000000000000000000000000000000000000000000001a00000000000000000000000000000000000000000000000000000000356f5edbb00000000000000000000000000000000000000000000000000000003546551a00000000000000000000000001d64fb0ffa8362b2e1ee7ee03929159551eab26e000000000000000000000000000000000000000000000000000000000000022000000…	16112654	0x8de424b8f9fc890bb37ec6a4ac99065fbe9650e858cb7b7aaff1cf57a297f0ae
66757	0x846b90cfe6f49878f624ab0dd7b3f03ee02940a51d9c0473cdeca1718268f464	0x46340b20830761efd32832a74d7169b29feb9758	0xa0b86991c6218b36c1d19d4a2e9eb0ce3606eb48	0	0xa9059cbb000000000000000000000000b865dc1aa024707980e3828c39337af14d715e0900000000000000000000000000000000000000000000000000000000011e9abe	16112654	0x8de424b8f9fc890bb37ec6a4ac99065fbe9650e858cb7b7aaff1cf57a297f0ae
66759	0xa46a2a94d21f0889f7549dc27678f5dee4aeee968a732b0016e030d2a2a5373f	0x28c6c06298d514db089934071355e5743bf21d60	0xdac17f958d2ee523a2206206994597c13d831ec7	0	0xa9059cbb000000000000000000000000e4e133e6d4921500d98186c57d31bc295fc2d42800000000000000000000000000000000000000000000000000000000159acd6b	16112654	0x8de424b8f9fc890bb37ec6a4ac99065fbe9650e858cb7b7aaff1cf57a297f0ae
66760	0x4efe32fc3e74a2e891e3b91df059d1eaf1fc9843dcce8eba1bbbe9d797cbbf7d	0x46340b20830761efd32832a74d7169b29feb9758	0x761d38e5ddf6ccf6cf7c55759d5210750b5d60f3	0	0xa9059cbb00000000000000000000000018fca7cd70f6416773a3da51fb62450f96bf40f40000000000000000000000000000000000000000002ed18433ccd270a6640000	16112654	0x8de424b8f9fc890bb37ec6a4ac99065fbe9650e858cb7b7aaff1cf57a297f0ae
66761	0xe9ae4ec4fcd2a9ff2d9a734b951c85258a8962a1733995b620cfcaff4dff342d	0x57d4e9b4a191d2bba64abd6c9250a500e29eea74	0x9850d59e37005e9d5261872d1c3c9ea43d95b89c	2.5e+18	0x	16112654	0x8de424b8f9fc890bb37ec6a4ac99065fbe9650e858cb7b7aaff1cf57a297f0ae
66762	0xbda8ccc50768614ff67b2b6103bce14b14c6acf33579c7484cbb32b4b041e1df	0x2ee32536e38057ea2d17ed43cccd9c48fa8e80a6	0x68b3465833fb72a70ecdf485e0e4c7bd8665fc45	0	0x5ae401dc00000000000000000000000000000000000000000000000000000000638cd257000000000000000000000000000000000000000000000000000000000000004000000000000000000000000000000000000000000000000000000000000000020000000000000000000000000000000000000000000000000000000000000040000000000000000000000000000000000000000000000000000000000000016000000000000000000000000000000000000000000000000000000000000000e4472b4…	16112654	0x8de424b8f9fc890bb37ec6a4ac99065fbe9650e858cb7b7aaff1cf57a297f0ae
66763	0x240a08f62dad3a99acb1edc425dbf48ca8e758e0a71c41c07fb0a31a34d7ddb8	0xc2922a77cd73669612a54368e97bfcdb2c957a6b	0x5a7cbca2c10ff3b48d0aca91d6199e64dd7d5256	3.96e+16	0x	16112654	0x8de424b8f9fc890bb37ec6a4ac99065fbe9650e858cb7b7aaff1cf57a297f0ae
66767	0xaa1f353918e7d2e464a449c589016fadf02b8b0ff228a9dcb36bf79032576525	0xbfaab38f26454cf5ae0570436415d4ad94336f43	0x72ce9c846789fdb6fc1f34ac4ad25dd9ef7031ef	292000000000000	0xd2ce7d650000000000000000000000000391d2021f89dc339f60fff84546ea23e337750f000000000000000000000000bfaab38f26454cf5ae0570436415d4ad94336f43000000000000000000000000000000000000000000000000ca9d9ea558b4000000000000000000000000000000000000000000000000000000000000000178660000000000000000000000000000000000000000000000000000000011e1a30000000000000000000000000000000000000000000000000000000000000000c000000…	16112654	0x8de424b8f9fc890bb37ec6a4ac99065fbe9650e858cb7b7aaff1cf57a297f0ae
66768	0x0533e2a586cfb0f367d77cb53817b032784f0074ed2c97dd1d5e5b1f5dd39aa5	0x46340b20830761efd32832a74d7169b29feb9758	0x1ee11c73d7d3ad041f00cb2c24516e602ef0bf0b	1.6e+16	0x	16112654	0x8de424b8f9fc890bb37ec6a4ac99065fbe9650e858cb7b7aaff1cf57a297f0ae
66769	0x30fd749078bf651e6e5ac647925f522db68335df7824cd9fafbee58b84a2a5b7	0xfbb1b73c4f0bda4f67dca266ce6ef42f520fbb98	0xf411903cbc70a74d22900a5de66a2dda66507255	0	0xa9059cbb000000000000000000000000f1be198f05ee68b0cced2872187a7b6e1f3a7dbb000000000000000000000000000000000000000000000b85fd0638d0b7197800	16112654	0x8de424b8f9fc890bb37ec6a4ac99065fbe9650e858cb7b7aaff1cf57a297f0ae
66772	0x74827f6237c37d7b2ad607bc3e91f83b3a42fd5761e2727d22faaa01e7f924e2	0x6046945c5b5ef5933b8e73a98a6ad7bf3e031df7	0x6046945c5b5ef5933b8e73a98a6ad7bf3e031df7	5633	0x	16112654	0x8de424b8f9fc890bb37ec6a4ac99065fbe9650e858cb7b7aaff1cf57a297f0ae
66773	0x54b0b92077ecedb7d2c6628f09570fc721271d381f36f63fede64e65a6f4ba05	0xae26eaad142d57377894ea7587202d19a78d6dfe	0x4dbd4fc535ac27206064b68ffcf827b0a60bab3f	1.09e+18	0x439370b1	16112654	0x8de424b8f9fc890bb37ec6a4ac99065fbe9650e858cb7b7aaff1cf57a297f0ae
66774	0x6ec47a96bb0adf1828e5efe9f7421f89f8c21f757bf2a4eeaba9f340a1ed72cb	0x21e13f12eb85b9c116f475b43a092f66d706aefb	0x06450dee7fd2fb8e39061434babcfc05599a6fb8	0	0x9ff054df0000000000000000000000000000000000000000000000000000000000000096	16112654	0x8de424b8f9fc890bb37ec6a4ac99065fbe9650e858cb7b7aaff1cf57a297f0ae
66775	0x4612eadc30295ae10a61845381ea772f753bb25355bf4c89497761b5c9082bd1	0xb1d623c5c6bc228df82f08356247c01a0b2a08eb	0x0000000000c2d145a2526bd8c716263bfebe1a72	0	0x32389b7100000000000000000000000000000000000000000000000000000000000000400000007b02230091a7ed01230072f7006a004d60a8d4e71d599b8104250f000000000000000000000000000000000000000000000000000000000000000000010000000000000000000000000000000000000000000000000000000000000020000000000000000000000000000000000000000000000000000000000000006000000000000000000000000058e5bf4ab9bc4d8f4032cf03a32d87528c4e182c00000…	16112654	0x8de424b8f9fc890bb37ec6a4ac99065fbe9650e858cb7b7aaff1cf57a297f0ae
66777	0x70884b847f39507205a0cc3d4bc495b7c5564a656bd6d4efdd6a47b8832177d8	0x4440dd7d0ee16f95e3325a9748587b447961fade	0xf041c6b49e7ebd99516a25359b978ef2ee75810f	0	0x66ca9b8300000000000000000000000000000000000000000000000000000000000000050000000000000000000000000000000000000000000000000000000000000032	16112654	0x8de424b8f9fc890bb37ec6a4ac99065fbe9650e858cb7b7aaff1cf57a297f0ae
66779	0xf8362eb0572e452a6114943a33c8280c03581b911dc40d87ebebe6957f0b73fb	0x5bd4c939a9f10ee5bffc31d239614916e18b8ece	0x497b54355043e7a0d06bf5e3c20cecf859fcc0a8	0	0xa22cb46500000000000000000000000000000000000111abe46ff893f3b2fdf1f759a8a80000000000000000000000000000000000000000000000000000000000000001	16112653	0x384f49a657194e6e939bdd3d01d27e8310f06d9413320eeea3d10419dd8d5095
66780	0x2afd384ed25a9c9fdc9d17129a66a029fb850309be71e6ca2ceba1150e746438	0x1a8ed0d3ad42c9019cc141aace7e5fb6e576b917	0x5a54fe5234e811466d5366846283323c954310b2	0	0x46f83b50000000000000000000000000000000000000000000000000000000000000006fcd6eda4708c453acb391ec506002af63b57cc1dc7032b6c8ad926221f45de6520000000000000000000000000000000000000000000000000000000000000014fb1cb719c652b691496938ce743a6111859e4595af62858c3c0ba9dc1ed06198	16112653	0x384f49a657194e6e939bdd3d01d27e8310f06d9413320eeea3d10419dd8d5095
66781	0xcdc0486b6cb60d3882dad5056d418c5abcc1e3351298b2bdeadf509414841b77	0xb51641a888474d1a3a6143a73bb3103e77f4c1ff	0x76f4eed9fe41262669d0250b2a97db79712ad855	0	0xf17a454600000000000000000000000000000000000000000000000000000000000000c000000000000000000000000000000000000000000000000000000000000001a0000000000000000000000000000000000000000000000001d11063cf3cb63e5500000000000000000000000000000000000000000000000000000000000000010000000000000000000000001d64fb0ffa8362b2e1ee7ee03929159551eab26e000000000000000000000000000000000000000000000000000000000000022000000…	16112653	0x384f49a657194e6e939bdd3d01d27e8310f06d9413320eeea3d10419dd8d5095
66782	0x8e97b2205a26c28df56a5304640f51958e6226622c758142d702102748cb5a49	0x53f997da7206d6bf90ffc4236b3ca8efb7bb1a89	0x00000000006c3852cbef3e08e8df289169ede581	3.33e+16	0xfb0f3ee1000000000000000000000000000000000000000000000000000000000000002000000000000000000000000000000000000000000000000000000000000000000000000000000000000000000000000000000000000000000000000000000000000000000000000000000000000000000000000000000000006a798e63eb20000000000000000000000000005a297b79325f74b7e947db6313e4de2598ca826a000000000000000000000000004c00500000ad104d7dbd00e3ae0a5c00560c0000000…	16112653	0x384f49a657194e6e939bdd3d01d27e8310f06d9413320eeea3d10419dd8d5095
66784	0x16b51968dffb4296cd4cf99e9bf24f67bf29f117d42f2a06152b375ab7afd03e	0x09564716e12eb2ca51f64d07d76aa88b7cdc0283	0xeeeec6476073778077b40a73fe32e23a9876cab4	7.91e+16	0x2b66d72e000000000000000000000000000000000000000000000000000000000000002000000000000000000000000000000000000000000000000000000000000000ee65794a68624763694f694a46557a49314e694973496d74705a434936496a64684e6a526c5a6d51314c544a694e4463744e475a6a5a6931684f4463784c5445785a6d59354f5451345954646a4f434a392e436763784d6a597a4c6a513345674e56553051614a47497a5a6a52684e7a4d7a4c545978595745744e445a6a4d6931684e5…	16112653	0x384f49a657194e6e939bdd3d01d27e8310f06d9413320eeea3d10419dd8d5095
66785	0x9576542056445fe0e6c01d556a4b085342c4532360e06a126900b631a94d52d8	0x27c2dfaf0b5e8f5c60aaf786fdbd882d7c05e341	0x1111111254fb6c44bac0bed2854e76f90643097d	0	0x2e95b6c800000000000000000000000025f8087ead173b73d6e8b84329989a8eea16cf7300000000000000000000000000000000000000000000000a369a5ccdad250000000000000000000000000000000000000000000000000000007cab300ab15f490000000000000000000000000000000000000000000000000000000000000080000000000000000000000000000000000000000000000000000000000000000140000000000000003b6d034099b42f2b49c395d2a77d973f6009abb5d67da34399061…	16112653	0x384f49a657194e6e939bdd3d01d27e8310f06d9413320eeea3d10419dd8d5095
66787	0xa7c196c13fb29648d1a86a41ccd98ba5abcb3cd6264912a7813da9e058a1ae46	0xd3e52099a6a48f132cb23b1364b7dee212d862f6	0x6b175474e89094c44da98b954eedeac495271d0f	0	0xa9059cbb000000000000000000000000421a340d3d8bbbe2133f250869e484fd027cad300000000000000000000000000000000000000000000000084b4d315f0ac40000	16112653	0x384f49a657194e6e939bdd3d01d27e8310f06d9413320eeea3d10419dd8d5095
66789	0x57b8539549ba98ece24a61a6e327514b48d064dbec5ca61b88c8d23a9d0c7b63	0xa60b4714bc421fc41c14ab510a0bea973b6415ee	0x39da41747a83aee658334415666f3ef92dd0d541	1.6e+16	0x9a2b811500000000000000000000000000000000000000000000000000000000000000200000000000000000000000000000000000000000000000000000000000000001000000000000000000000000000000000000000000000000000000000000002000000000000000000000000000000000000000000000000000000000000000040000000000000000000000000000000000000000000000000038d7ea4c680000000000000000000000000000000000000000000000000000000000000000006000000…	16112653	0x384f49a657194e6e939bdd3d01d27e8310f06d9413320eeea3d10419dd8d5095
66797	0xfd10c38704b391514990cfb23509663a57137d315f84fe6d1388c2352637978d	0x95829c9acfecaec0ee594a377311b0937c4a2882	0x31efc4aeaa7c39e54a33fdc3c46ee2bd70ae0a09	0	0xd9459372000000000000000000000000000000000000000000000000000000000000002000000000000000000000000031efc4aeaa7c39e54a33fdc3c46ee2bd70ae0a09000000000000000000000000997f29174a766a1da04cf77d135d59dd12fb54d100000000000000000000000095829c9acfecaec0ee594a377311b0937c4a28820000000000000000000000001231deb6f5749ef6ce6943a275a1d3e7486f4eae0000000000000000000000002170ed0880ac9a755fd29b2688956bd959f933f800000…	16112653	0x384f49a657194e6e939bdd3d01d27e8310f06d9413320eeea3d10419dd8d5095
66799	0x4e3badb1d4f4351ba52f258098ceba927dddedcad86197e67476cf9da0b6cdab	0xa9831d89c4067bf7518efbcb6351ef6dd0059f33	0xdac17f958d2ee523a2206206994597c13d831ec7	0	0x23b872dd0000000000000000000000003f44e3f8dd48ac53f30ccca1074e2f324bc2f43300000000000000000000000080dc2e375d5b48e09a6984e6f03962fb239af1e20000000000000000000000000000000000000000000000000000000000000000	16112653	0x384f49a657194e6e939bdd3d01d27e8310f06d9413320eeea3d10419dd8d5095
66800	0x370681bfa64e2ddb782c7d5aaf4874567f1791d5fb7a35790074dfb24e0b297b	0x81a8136606eeb6c6bd4f635c1230d424ed6877ee	0x68b3465833fb72a70ecdf485e0e4c7bd8665fc45	1.76e+16	0x5ae401dc00000000000000000000000000000000000000000000000000000000638cd24b00000000000000000000000000000000000000000000000000000000000000400000000000000000000000000000000000000000000000000000000000000001000000000000000000000000000000000000000000000000000000000000002000000000000000000000000000000000000000000000000000000000000000e4472b43f3000000000000000000000000000000000000000000000000003e6cefc7e57…	16112653	0x384f49a657194e6e939bdd3d01d27e8310f06d9413320eeea3d10419dd8d5095
66801	0xa3c487f82dfe61e78e1c95101db91e8e9f147a7bea33c593ee60805e01e91691	0x51f66c9566c42037f3ff62142594af7c62b31fdb	0x68b3465833fb72a70ecdf485e0e4c7bd8665fc45	2.5e+17	0x5ae401dc00000000000000000000000000000000000000000000000000000000638cd25700000000000000000000000000000000000000000000000000000000000000400000000000000000000000000000000000000000000000000000000000000001000000000000000000000000000000000000000000000000000000000000002000000000000000000000000000000000000000000000000000000000000000e4472b43f300000000000000000000000000000000000000000000000003782dace9d90…	16112653	0x384f49a657194e6e939bdd3d01d27e8310f06d9413320eeea3d10419dd8d5095
66802	0x46446c444c2d1496b277f674bdf0729c29de999663fe9a16c063b14db9e0a0a4	0xf16e9b0d03470827a95cdfd0cb8a8a3b46969b91	0xd13cfd3133239a3c73a9e535a5c4dadee36b395c	0	0xa9059cbb00000000000000000000000081153f0889ab398c4acb42cb58b565a5392bba95000000000000000000000000000000000000000000000ad04e4551bb00890000	16112653	0x384f49a657194e6e939bdd3d01d27e8310f06d9413320eeea3d10419dd8d5095
66806	0x220bc31c8579a145367812d2eb2357bb6bf401e9c53eb53717ec63b48696ed20	0x28ffe35688ffffd0659aee2e34778b0ae4e193ad	0x307fa305f2bbae8fc1fe865ac97deca2aab31f7d	1.03e+16	0x	16112653	0x384f49a657194e6e939bdd3d01d27e8310f06d9413320eeea3d10419dd8d5095
66807	0x88bbae4eaaadd53a837dd0376b4c9200a5b3259055f6774100db03bfcae97ef0	0x4b47052498d469ac9521606a67d6f02afeb0985a	0xd9e1ce17f2641f24ae83637ab66a2cca9c378b9f	0	0x38ed173900000000000000000000000000000000000000000000000000000000000f424000000000000000000000000000000000000000000000000002d903054a12bd1500000000000000000000000000000000000000000000000000000000000000a00000000000000000000000004b47052498d469ac9521606a67d6f02afeb0985a00000000000000000000000000000000000000000000000000000000638cd0e3000000000000000000000000000000000000000000000000000000000000000300000…	16112653	0x384f49a657194e6e939bdd3d01d27e8310f06d9413320eeea3d10419dd8d5095
66808	0xc6ac9c411e37cf20e199003d518e1112fe3bf3d72b0015e22c4b87100f39875f	0x9131484ba720ede48e493355cb0b68cdd90b148e	0x68b3465833fb72a70ecdf485e0e4c7bd8665fc45	0	0x5ae401dc00000000000000000000000000000000000000000000000000000000638cd2570000000000000000000000000000000000000000000000000000000000000040000000000000000000000000000000000000000000000000000000000000000300000000000000000000000000000000000000000000000000000000000000600000000000000000000000000000000000000000000000000000000000000160000000000000000000000000000000000000000000000000000000000000028000000…	16112653	0x384f49a657194e6e939bdd3d01d27e8310f06d9413320eeea3d10419dd8d5095
66809	0x9e44e6db4375b6cdcc791f6467e317bed6c906f359ac7941d16b4ba8f00b4433	0x705d2488020b87cac572c58999832b771c8f6e80	0x68b3465833fb72a70ecdf485e0e4c7bd8665fc45	0	0x5ae401dc00000000000000000000000000000000000000000000000000000000638cd257000000000000000000000000000000000000000000000000000000000000004000000000000000000000000000000000000000000000000000000000000000020000000000000000000000000000000000000000000000000000000000000040000000000000000000000000000000000000000000000000000000000000016000000000000000000000000000000000000000000000000000000000000000e4472b4…	16112653	0x384f49a657194e6e939bdd3d01d27e8310f06d9413320eeea3d10419dd8d5095
66810	0x208bfa5381a167016ea2a863a68a93985eba8356f032e9e350a14af897bed2be	0xf16e9b0d03470827a95cdfd0cb8a8a3b46969b91	0x419c4db4b9e25d6db2ad9691ccb832c8d9fda05e	0	0xa9059cbb0000000000000000000000003d00e780d5d13acd7da37df5029bbf47b2faa9780000000000000000000000000000000000000000000002506abe150e1c644000	16112653	0x384f49a657194e6e939bdd3d01d27e8310f06d9413320eeea3d10419dd8d5095
66811	0xd1ac77523935c01d524d368e2248cb69b9d689b2808fa98a678fb211acd82b37	0x9e3aadc9ba267be3f2e3d7b1e0a02b0e265289b3	0x49cf6f5d44e70224e2e23fdcdd2c053f30ada28b	0	0xa22cb465000000000000000000000000f42aa99f011a1fa7cda90e5e98b277e306bca83e0000000000000000000000000000000000000000000000000000000000000001	16112653	0x384f49a657194e6e939bdd3d01d27e8310f06d9413320eeea3d10419dd8d5095
66812	0x8ea1aa64a85dc24a0a3b9f7488a27c5a4a34bf2f72bd1c510df852a4f6d7f18c	0x57d4e9b4a191d2bba64abd6c9250a500e29eea74	0x7c05b51362d26610de87e8f7e7297d5ee96b55a8	1e+18	0x	16112653	0x384f49a657194e6e939bdd3d01d27e8310f06d9413320eeea3d10419dd8d5095
66814	0x8a153b528b1d5fa98064b87f270952fedd310b6e031f3a1cac869c381fd6a310	0x63095ce68ae2f6dc0a3e068d97f2d392c51ebd06	0xc02aaa39b223fe8d0a0e5c4f27ead9083c756cc2	0	0x2e1a7d4d000000000000000000000000000000000000000000000000345d7e1b48c3dca0	16112653	0x384f49a657194e6e939bdd3d01d27e8310f06d9413320eeea3d10419dd8d5095
66815	0xe278793a9ecf6fcd88fdfe614726a56ee86aeacf3c4c1f0f65b78d327499df0a	0x14d1bf87485f09f2e1fd68685ff7cb2780bb72d9	0xd4190dd1da460fc7bc41a792e688604778820ac9	0	0xa22cb46500000000000000000000000000000000000111abe46ff893f3b2fdf1f759a8a80000000000000000000000000000000000000000000000000000000000000001	16112653	0x384f49a657194e6e939bdd3d01d27e8310f06d9413320eeea3d10419dd8d5095
66817	0xc5f9f06dec16e4df5d2898d0e1f82298b46d588216b7b5fa401c4caf3dda7dd2	0x6c274c0b4398f01f0e654bf2d0c46e0ce4f4781f	0xeeeec6476073778077b40a73fe32e23a9876cab4	7.91e+16	0x2b66d72e000000000000000000000000000000000000000000000000000000000000002000000000000000000000000000000000000000000000000000000000000000ee65794a68624763694f694a46557a49314e694973496d74705a434936496a64684e6a526c5a6d51314c544a694e4463744e475a6a5a6931684f4463784c5445785a6d59354f5451345954646a4f434a392e436763784d6a597a4c6a513345674e56553051614a4749334f54417a5a474e684c54453259324d744e4451775a6931695a6…	16112653	0x384f49a657194e6e939bdd3d01d27e8310f06d9413320eeea3d10419dd8d5095
66819	0xae8a4b6c641f44eaf83338eece05822926ade663f62ffa212aa7d343d697e186	0xb63ef0c9d8510b8dc61adf857af24e10fd29c6e9	0xf1be5b2e6f59b5a3fc2295df81064a0b1ae7949b	1e+17	0x	16112653	0x384f49a657194e6e939bdd3d01d27e8310f06d9413320eeea3d10419dd8d5095
66820	0x2e2971e879acec44a501547a84ceea0dade7c5d366974e47962055c689001e4f	0xcad621da75a66c7a8f4ff86d30a2bf981bfc8fdd	0x6c902dac2ec48bad1a7414af99e904be699359e5	9.72e+16	0x	16112653	0x384f49a657194e6e939bdd3d01d27e8310f06d9413320eeea3d10419dd8d5095
66823	0xe5f9d049403a584ae3e42c5938df336e315ba49976951e7ac3d6c0e1f24edd15	0xc0da5e49f533ee09930953762e9120984fc8fd8f	0x5c75c702e7c08a05e9d49cab78fc5e28b6c5c55a	0	0x095ea7b300000000000000000000000068b3465833fb72a70ecdf485e0e4c7bd8665fc45ffffffffffffffffffffffffffffffffffffffffffffffffffffffffffffffff	16112653	0x384f49a657194e6e939bdd3d01d27e8310f06d9413320eeea3d10419dd8d5095
66824	0xc4f557a99362f493043d18cc419979ba11b1cff3a787d1c49480a52c711427ed	0xd307ddf1455235139cec546774155e757b1a25fa	0x788a900b680492fdcf9e63ab9bb4ab255e81198d	2000000000000000	0x	16112653	0x384f49a657194e6e939bdd3d01d27e8310f06d9413320eeea3d10419dd8d5095
66825	0x09c076bb6738432d8a787f1e692e4fee85d347ccef40cbdbb9aa6b321d293990	0xa8a5b4e535268a91d330a1b26e11030831eed35f	0xd5a39717bed6e2417d8777c49611a6375e1e473e	0	0x2e7ba6ef0000000000000000000000000000000000000000000000000000000000002b94000000000000000000000000a8a5b4e535268a91d330a1b26e11030831eed35f0000000000000000000000000000000000000000000000013465315ee6e480000000000000000000000000000000000000000000000000000000000000000080000000000000000000000000000000000000000000000000000000000000000dfa75d0afea9a8aa9d6825f8d46efaf0f823d749e778d20af280918d7afb08472fe3e1…	16112653	0x384f49a657194e6e939bdd3d01d27e8310f06d9413320eeea3d10419dd8d5095
66828	0x754a792ac204fbed1fefe590f0674c5b576904d76ce80fd9bc6cc8dc6c7907ef	0xcac725bef4f114f728cbcfd744a731c2a463c3fc	0x5e9db3a262b8733177071d370dc554cad7049b86	1.63e+18	0x	16112653	0x384f49a657194e6e939bdd3d01d27e8310f06d9413320eeea3d10419dd8d5095
66829	0x616a2c7d8e16579e94fb0c6bcc55c6537f7c34aab146941bb3f0b75ce78088b5	0xdbd3d920bef6dae092f24e0827404bd4dfb80009	0x3b3ae790df4f312e745d270119c6052904fb6790	0	0xb80c2f09000000000000000000000000000000000000000000000000002430ac177b0c03000000000000000000000000dac17f958d2ee523a2206206994597c13d831ec700000000000000000000000003ab458634910aad20ef5f1c8ee96f1d6ac549190000000000000000000000000000000000000000000000000000000005f5e100000000000000000000000000000000000000000000000004c24caf7761c8edf800000000000000000000000000000000000000000000000000000000638cd96700000…	16112653	0x384f49a657194e6e939bdd3d01d27e8310f06d9413320eeea3d10419dd8d5095
66830	0xaf7a625f2d2ac3ccf911adbe6e72e4029f20d930480bb5b93bd0734fd5a757b2	0x1c727a55ea3c11b0ab7d3a361fe0f3c47ce6de5d	0x0d8775f648430679a709e98d2b0cb6250d2887ef	0	0xa9059cbb0000000000000000000000005837660e2c15b5825737a15eb08791e06b1fcf7700000000000000000000000000000000000000000000000ae22a77190462cec9	16112653	0x384f49a657194e6e939bdd3d01d27e8310f06d9413320eeea3d10419dd8d5095
66831	0xe22d0352a198cb145e580b5852e7736c15951709d61c411242c6dd99a8ee3d0c	0xd54e4f8a55247487dd7c8c59f14ee5c0c2889477	0x6352a56caadc4f1e25cd6c75970fa768a3304e64	0	0x8980041a000000000000000000000000c02aaa39b223fe8d0a0e5c4f27ead9083c756cc2000000000000000000000000000000000000000000000000006a94d74f4300000000000000000000000000000000000000000000000000208724575a14cdb3f20000000000000000000000000000000000000000000000000000000000000080000000000000000000000000000000000000000000000000000000000000000280000000000000003b6d0340c3d03e4f041fd4cd388c549ee2a29a9e5075882f00000…	16112653	0x384f49a657194e6e939bdd3d01d27e8310f06d9413320eeea3d10419dd8d5095
66832	0x7f0ccd5ee16a6e94ed56808058bf10d88a3186bec67481003bb81786b464b2e7	0xb9808cecaab07e7cf7891096217259911efd1059	0x6b175474e89094c44da98b954eedeac495271d0f	0	0x095ea7b300000000000000000000000024946bcbbd028d5abb62ad9b635eb1b1a67af668ffffffffffffffffffffffffffffffffffffffffffffffffffffffffffffffff	16112653	0x384f49a657194e6e939bdd3d01d27e8310f06d9413320eeea3d10419dd8d5095
66834	0x2599089cdfe142e2bdf37020d130741965b40d416cf80cde066eb4e061e4a834	0x6db303b564a05e9c17fbb22c7108561e08c3ae7b	0x2260fac5e5542a773aa44fbcfedf7c193bc2c599	0	0x095ea7b3000000000000000000000000c186fa914353c44b2e33ebe05f21846f1048bedaffffffffffffffffffffffffffffffffffffffffffffffffffffffffffffffff	16112653	0x384f49a657194e6e939bdd3d01d27e8310f06d9413320eeea3d10419dd8d5095
66835	0x6f88b7fcdf4ad45c81d6664b8a921b7dedf52fc0ee27c938eefa11bc605ca3f8	0x3c0871c2fd9544d80cef3bb67cfaedf67e924c54	0xb50ad064fc9973c0ebdd308ff863b231e988304d	1.26e+19	0x	16112653	0x384f49a657194e6e939bdd3d01d27e8310f06d9413320eeea3d10419dd8d5095
66836	0x9e2632c249673722d1f2d706e9c46b1e41b1b1182563764913bc01cda74d4a16	0x39576816593a973b71d59dcfbf7f73561e2265b3	0x7492e30d60d96c58ed0f0dc2fe536098c620c4c0	0	0xefef39a10000000000000000000000000000000000000000000000000000000000000001	16112653	0x384f49a657194e6e939bdd3d01d27e8310f06d9413320eeea3d10419dd8d5095
66838	0x0cb7980dacb0765e5a63832877e3304abe5da82dda01dc5d3df9e839d12c75e1	0x79cdf544165e413b8363ace4cff548e15a64bbce	0x68b3465833fb72a70ecdf485e0e4c7bd8665fc45	5e+16	0x5ae401dc00000000000000000000000000000000000000000000000000000000638cd25700000000000000000000000000000000000000000000000000000000000000400000000000000000000000000000000000000000000000000000000000000001000000000000000000000000000000000000000000000000000000000000002000000000000000000000000000000000000000000000000000000000000000e4472b43f300000000000000000000000000000000000000000000000000b1a2bc2ec50…	16112653	0x384f49a657194e6e939bdd3d01d27e8310f06d9413320eeea3d10419dd8d5095
66841	0x210869f44fcaf700b2bd4c82caffacfb6d6f53f795138eade45dd1b9aabd9f17	0xb4b57125af2acf9bf605a9d9c3d256537876f65a	0x850d754a640f640b8d9844518f584ee131a57c9d	0	0xf242432a000000000000000000000000b4b57125af2acf9bf605a9d9c3d256537876f65a0000000000000000000000006457a438e924eeeb2aa14c254db044bf774b62eb0000000000000000000000000000000000000000000000000000000067793144000000000000000000000000000000000000000000000000000000000000000100000000000000000000000000000000000000000000000000000000000000a00000000000000000000000000000000000000000000000000000000000000000	16112653	0x384f49a657194e6e939bdd3d01d27e8310f06d9413320eeea3d10419dd8d5095
66842	0xeacf21435c1bebb9cdc555b5e0ca3d186fb9f111d2d71da5dbe3a3cd5c02713d	0xf16e9b0d03470827a95cdfd0cb8a8a3b46969b91	0x95ad61b0a150d79219dcf64e1e6cc01f0b64c4ce	0	0xa9059cbb0000000000000000000000000fd2d9b9ab3b2454bd520413c129269c9907c8d200000000000000000000000000000000000000000025bd1ed4cbcc71ff8f4000	16112653	0x384f49a657194e6e939bdd3d01d27e8310f06d9413320eeea3d10419dd8d5095
66843	0x6d97551840c0f1d474e76b53e7d1c8304773571b1b157b49448c4700b0751aa3	0xcac725bef4f114f728cbcfd744a731c2a463c3fc	0x9d14ed2c43264ca8568148290d0dff0f7dc03b7e	1.22e+16	0x	16112653	0x384f49a657194e6e939bdd3d01d27e8310f06d9413320eeea3d10419dd8d5095
66846	0x9cb0441280683e8a5cda58e01973e06aba656fad4c1b9a2712ff72eea53b3a83	0xdfd5293d8e347dfe59e90efd55b2956a1343963d	0xf408bee3443d0397e2c1cde588fb060ac657006f	2e+19	0x	16112653	0x384f49a657194e6e939bdd3d01d27e8310f06d9413320eeea3d10419dd8d5095
66847	0x07bd539350349217031e6b0a005661f180c178ecf440bfab78eca951fba5df5f	0x0124d0fa0dfb1430dfcff16ec6a96945e7a0bc10	0x626c27bcb7739ca923ff1c592dd1efebd4f7c829	0	0xca8bd1f902140100271027109410cf01dcdccdb9b56e285b39cea375e5e90883c02aaa39b223fe8d0a0e5c4f27ead9083c756cc200000126f227107a99822968410431edd1ee75dab78866e31caf39295b42684f90c77da7ea46336001010f2791ec8c07081e5e03d276480804300d66ce4fe68000000000	16112653	0x384f49a657194e6e939bdd3d01d27e8310f06d9413320eeea3d10419dd8d5095
66848	0x819723f4074c1ee21aeb7d659435650b0e02cb055e4fd145e41a19e5dfcdc9b8	0x340f4dffb3148a7817f58e993edc743de4eb2e57	0x00000000006c3852cbef3e08e8df289169ede581	0	0xfb0f3ee1000000000000000000000000000000000000000000000000000000000000002000000000000000000000000034d85c9cdeb23fa97cb08333b511ac86e1c4e2580000000000000000000000000000000000000000000000000000000000006d200000000000000000000000000000000000000000000000000000000000000001000000000000000000000000ffa7282b67f72edd50e37b68d3599aa3ff3a9fb8000000000000000000000000004c00500000ad104d7dbd00e3ae0a5c00560c0000000…	16112653	0x384f49a657194e6e939bdd3d01d27e8310f06d9413320eeea3d10419dd8d5095
66849	0xed5720bdcbac585aecdd07eaa5731f44ca0b9168425bf9eb777f08f554dc27be	0x747dbfbcfb74fd5fc115896c758a2fdff581c702	0x283af0b28c62c092c9727f1ee09c02ca627eb7f5	4360000000000000	0xf7a1696300000000000000000000000000000000000000000000000000000000000000c0000000000000000000000000747dbfbcfb74fd5fc115896c758a2fdff581c7020000000000000000000000000000000000000000000000000000000001e185588607c26b184254e70b9f884665aa06aef5b50554b3d2ac4bcc7bac971424b47a0000000000000000000000004976fb03c32e5b8cfe2b6ccb31c09ba78ebaba41000000000000000000000000747dbfbcfb74fd5fc115896c758a2fdff581c70200000…	16112653	0x384f49a657194e6e939bdd3d01d27e8310f06d9413320eeea3d10419dd8d5095
66853	0x2ffc3bcfff24277dab8862efc23dce123deb2ae848ce7aaaaa70f22aeccad2d4	0x2fa41b91bdec7f28922c06a53273e22975058ee7	0xacedb970f5049c422e25eab102ebc13e687a1868	4.84e+17	0x	16112653	0x384f49a657194e6e939bdd3d01d27e8310f06d9413320eeea3d10419dd8d5095
66856	0x100515249a20e4a11b94426a813836fba682aa26dde76ad3c1ccda0b827923eb	0xcad621da75a66c7a8f4ff86d30a2bf981bfc8fdd	0x386b491722a971773ea5ca47069ec2a2042d6216	2.96e+16	0x	16112653	0x384f49a657194e6e939bdd3d01d27e8310f06d9413320eeea3d10419dd8d5095
66857	0x5a575b45760d695c799d65707e397b86aeb2993d8f6f4946731a762181218242	0xf11b44abb718d7e2bd71268c6758815f627c9d45	0x68b3465833fb72a70ecdf485e0e4c7bd8665fc45	1.5e+17	0x5ae401dc00000000000000000000000000000000000000000000000000000000638ccd8f00000000000000000000000000000000000000000000000000000000000000400000000000000000000000000000000000000000000000000000000000000001000000000000000000000000000000000000000000000000000000000000002000000000000000000000000000000000000000000000000000000000000000e4472b43f30000000000000000000000000000000000000000000000000214e8348c4f0…	16112653	0x384f49a657194e6e939bdd3d01d27e8310f06d9413320eeea3d10419dd8d5095
66858	0x1cdca6b0c551b033a02791ebb93065d4aa78381d423f8b1d196000631fa3236a	0x4976a4a02f38326660d17bf34b431dc6e2eb2327	0x338e349e675f8fe0ebb2c0720df4d7883943b6d9	9230000000000000	0x	16112653	0x384f49a657194e6e939bdd3d01d27e8310f06d9413320eeea3d10419dd8d5095
66861	0x700a2e4702f12fe928224db1ec2c9eb11c8725d50265514b0bf3671fe8e750fd	0x270acbaef5ba96ff00b14e11c125d86f4c5bb940	0xa1d0e215a23d7030842fc67ce582a6afa3ccab83	0	0xa9059cbb00000000000000000000000030741289523c2e4d2a62c7d6722686d14e723851000000000000000000000000000000000000000000000000280606b84c3a0000	16112653	0x384f49a657194e6e939bdd3d01d27e8310f06d9413320eeea3d10419dd8d5095
66862	0x6b6460425cef43abe5a39fb91013e2bdcad560d00e362c6049824685e709c0e1	0x44113f71ba1ae3ee58515e0997df08ac7a36637d	0xb852c6b5892256c264cc2c888ea462189154d8d7	0	0x23b872dd00000000000000000000000044113f71ba1ae3ee58515e0997df08ac7a36637d000000000000000000000000000000697bb288f2528042e8844b65cd32beafca00000000000000000000000000000000000000000000000000000000000021c1	16112653	0x384f49a657194e6e939bdd3d01d27e8310f06d9413320eeea3d10419dd8d5095
66864	0x2bea1ae1277bbe0523ba82480019f011b2b71ebc4a8e1f63656b837a86292281	0x12ef859fec1cef84b9220d9cc4e326c695166a45	0xfb4936603939accdc293202819c1d93e18973787	7.1e+16	0x	16112653	0x384f49a657194e6e939bdd3d01d27e8310f06d9413320eeea3d10419dd8d5095
66869	0x46ae2380f65af1760fb9a5f924bf39275bbce04c89e710b2518deb0ff33c8608	0x8c94072567b278b9fa12192cca899b3ce0ed5fdc	0x46ac8540d698167fcbb9e846511beb8cf8af9bd8	0	0x42842e0e0000000000000000000000008c94072567b278b9fa12192cca899b3ce0ed5fdc0000000000000000000000006f182bd3ae8c291654c94fcbd8d80e8f2ea442b80000000000000000000000000000000000000000000000000000000000070505360c6ebe	16112653	0x384f49a657194e6e939bdd3d01d27e8310f06d9413320eeea3d10419dd8d5095
66870	0x6a0a0b69bc2875f0b30a609804d1b6fb19c5541d0299fa47be4bbf490d5be28c	0x6cc8dcbca746a6e4fdefb98e1d0df903b107fd21	0xdac17f958d2ee523a2206206994597c13d831ec7	0	0xa9059cbb000000000000000000000000d21143c70cc9af1fb0ba2fc2e7dae2f649eb3dc20000000000000000000000000000000000000000000000000000000017d70ed0	16112653	0x384f49a657194e6e939bdd3d01d27e8310f06d9413320eeea3d10419dd8d5095
66874	0x5ece914e9dc7e7181587e8389f6936866bb71a940a4a3c5278f344e509704140	0xe95f6604a591f6ba33accb43a8a885c9c272108c	0x9db6576b69e4f4803b145310e48d2e2f31ec2a64	2.1e+16	0x	16112653	0x384f49a657194e6e939bdd3d01d27e8310f06d9413320eeea3d10419dd8d5095
66877	0xf37b7a5b2b5a1c32918cb0ad1b0735917658827cf86a739b3db60dd6dddda7e3	0xf16e9b0d03470827a95cdfd0cb8a8a3b46969b91	0x514910771af9ca656af840dff83e8264ecf986ca	0	0xa9059cbb0000000000000000000000005f843deaef0c15858e86741f45baaacfe9457d4d000000000000000000000000000000000000000000000000425f355c56c88000	16112653	0x384f49a657194e6e939bdd3d01d27e8310f06d9413320eeea3d10419dd8d5095
66878	0x2df9365d0ae084f1fcf5540e3e17c412c94dd18b4656ac5c64dff9ecf2e121d9	0x28c6c06298d514db089934071355e5743bf21d60	0x8d4566dcb73db70a54f7de7f9686ab5ebe580aaa	9560000000000000	0x	16112653	0x384f49a657194e6e939bdd3d01d27e8310f06d9413320eeea3d10419dd8d5095
66879	0x0edd3374934553995b86f1288610845ca77409c4db194528163c82220da11e14	0x3b6221720d4980b1eab82d809742baed5a83bfd1	0x881d40237659c251811cec9c364ef91dc08d300c	8000000000000000	0x5f57552900000000000000000000000000000000000000000000000000000000000000800000000000000000000000000000000000000000000000000000000000000000000000000000000000000000000000000000000000000000001c6bf52634000000000000000000000000000000000000000000000000000000000000000000c000000000000000000000000000000000000000000000000000000000000000147061726173776170563546656544796e616d696300000000000000000000000000000…	16112653	0x384f49a657194e6e939bdd3d01d27e8310f06d9413320eeea3d10419dd8d5095
66881	0xb73af449fa0de6dd3b5c29b9bbcb1fd9a546d4cf082a6ae1b5ae445860bb7972	0x4bb2da4cc9d4210bea584806b13b6056edd3e292	0xa1d0e215a23d7030842fc67ce582a6afa3ccab83	0	0xa9059cbb00000000000000000000000030741289523c2e4d2a62c7d6722686d14e723851000000000000000000000000000000000000000000000000c5fe90e9027f8000	16112653	0x384f49a657194e6e939bdd3d01d27e8310f06d9413320eeea3d10419dd8d5095
66884	0xc3a2211bc2509601e822df58142b851e0a19f6ab4fab608c176052944fc027bb	0x21a31ee1afc51d94c2efccaa2092ad1028285549	0x95ad61b0a150d79219dcf64e1e6cc01f0b64c4ce	0	0xa9059cbb00000000000000000000000049fe1c55b990cd993c3efe502fb6adb00d7ccf8e00000000000000000000000000000000000000000009d3dfafb73b98da370000	16112653	0x384f49a657194e6e939bdd3d01d27e8310f06d9413320eeea3d10419dd8d5095
66886	0xeea4a8a80ace325d08ffb17fb0203de5ed7d58ba57fe640a3ee56f7be72eff0c	0x0acdd0fefb605957dfcba4816d77c43dec3f1f79	0xd28247b604f91e0df23d11303646b52a54efb66f	3000000000000000	0x	16112653	0x384f49a657194e6e939bdd3d01d27e8310f06d9413320eeea3d10419dd8d5095
66887	0xe01c7a008579bec1f1e741f2e2051d73b60cb3394014870bc85c430429a18858	0x27c2dfaf0b5e8f5c60aaf786fdbd882d7c05e341	0x25f8087ead173b73d6e8b84329989a8eea16cf73	0	0x095ea7b30000000000000000000000001111111254fb6c44bac0bed2854e76f90643097dffffffffffffffffffffffffffffffffffffffffffffffffffffffffffffffff	16112653	0x384f49a657194e6e939bdd3d01d27e8310f06d9413320eeea3d10419dd8d5095
66889	0x286dcb723008f71bc0bcf236f76ca7fddc0dd2cf9e42110a4487be7c9fba5ce4	0x52a258ed593c793251a89bfd36cae158ee9fc4f8	0x23c32b4ce3f30b816b4263eb8e35e8f5c114a474	652000000000000	0x	16112653	0x384f49a657194e6e939bdd3d01d27e8310f06d9413320eeea3d10419dd8d5095
66891	0x8791e97c297f0bcddb69b8af5b527b49b5ade4805f09d3e2fedd703089e50e2a	0xdcdb84e268710d6977cdf559aa77e7aecfc4dab1	0x72240d480ecf201002cd5eabc08104a1d0b2e25c	0	0x095ea7b300000000000000000000000068b3465833fb72a70ecdf485e0e4c7bd8665fc45ffffffffffffffffffffffffffffffffffffffffffffffffffffffffffffffff	16112653	0x384f49a657194e6e939bdd3d01d27e8310f06d9413320eeea3d10419dd8d5095
66892	0x31d2a0629428ced6ac2bbb468e12b5aec2ddb08c30776e11a708b3f88bf49a1e	0x6ece61d29b90642941c41240da924690da145696	0x5a54fe5234e811466d5366846283323c954310b2	0	0x46f83b50000000000000000000000000000000000000000000000000000000000000006fcd6eda4708c453acb391ec506002af63b57cc1dc7032b6c8ad926221f45de6520000000000000000000000000000000000000000000000000000000000000014fb1cb719c652b691496938ce743a6111859e4595af62858c3c0ba9dc1ed06198	16112653	0x384f49a657194e6e939bdd3d01d27e8310f06d9413320eeea3d10419dd8d5095
66893	0xfadd8ef03a612f3567a68ffa1b2f4739446e19211c0ff73642556e32f8b2f2cd	0xc5a93444cc4da6efb9e6fc6e5d3cb55a53b52396	0x0142609d3510a76677fa5bcf3e39d34e6f7e3172	3630000000000000	0x	16112653	0x384f49a657194e6e939bdd3d01d27e8310f06d9413320eeea3d10419dd8d5095
66894	0xecd0a04317802cda3b3aebd63cf87cdde6c1ceaa4c9108a03f6fd6a130cc823b	0x28ffe35688ffffd0659aee2e34778b0ae4e193ad	0x30b5b0efb35b8a6f8d698bf17c4743be965aaf4f	1.03e+16	0x	16112653	0x384f49a657194e6e939bdd3d01d27e8310f06d9413320eeea3d10419dd8d5095
66895	0xb9b7be155ff430f4c1bba363405cdf72d5e1a93888bf79d1744897f754c75e0d	0x23ec28598dceb2f7082cc3a9d670592dfed6e0dc	0x166fd4299364b21c7567e163d85d78d2fb2f8ad5	0	0x58666c04000000000000000000000000000000000000000000000000000000000000002000000000000000000000000000000000000000000000000000000000000000697b2270726f746f636f6c223a2022616c6570682d6f6666636861696e222c202276657273696f6e223a20312c2022636f6e74656e74223a2022516d5665397869486652446a5977394c736854525166356e717056694d376e3158387844515936766543734c756a227d0000000000000000000000000000000000000000000000	16112653	0x384f49a657194e6e939bdd3d01d27e8310f06d9413320eeea3d10419dd8d5095
66896	0x685b723dc24cb1983f13659b15213990efdbe7f11525ae4f1b05a4e3c3457852	0x4e5b2e1dc63f6b91cb6cd759936495434c7e972f	0xa1b8bdec5afc1244211ebd3b8ff4c1f8ce55dc28	2.98e+18	0x	16112653	0x384f49a657194e6e939bdd3d01d27e8310f06d9413320eeea3d10419dd8d5095
66897	0xf4322d4b33cd5bf7e12d8584f6fdd45c63dc049724a62975987bf3c955bc9ba6	0xd6aff9240d662e86b1c5d3c691dc436e58d0eacf	0x6b175474e89094c44da98b954eedeac495271d0f	0	0x095ea7b30000000000000000000000007d655c57f71464b6f83811c55d84009cd9f5221c000000000000000000000000000000000000000000000001b5267b1b18ce0000	16112653	0x384f49a657194e6e939bdd3d01d27e8310f06d9413320eeea3d10419dd8d5095
66900	0x36691f219f88de34f4efc78eb3b8031e6713b228ed80ef0d59e0f99bc81a8226	0x1c06c36a559bbe99adece16eb7a63c5e997b2ef3	0xf71530c1f043703085b42608ff9dcccc43210a8e	0	0x89eaa45c00000000000000000000000000000000000000000000c195e1dff2c0a147c17200000000000000000000000000000000000000000000a2645cd33fbfa7a1ae080206006e00000000000000000423b61d86e4f7fd02009410cf01dcdccdb9b56e285b39cea375e5e9088301007a99822968410431edd1ee75dab78866e31caf39	16112653	0x384f49a657194e6e939bdd3d01d27e8310f06d9413320eeea3d10419dd8d5095
66901	0xd6e18067bd99657c8100897616234e95dfb58c42e5fe9a1c4b84d251e1fee94c	0x29d5527caa78f1946a409fa6acaf14a0a4a0274b	0x5cc5d56918870f136ff6e586e77285953d0c1915	1.49e+16	0x	16112653	0x384f49a657194e6e939bdd3d01d27e8310f06d9413320eeea3d10419dd8d5095
66902	0xf3f62465531f69be66c7a8f7097c5233f227037af5a2bc2f1695cd568e7627d0	0xbda77851639db4dbd7b006e50227e931330e6b6b	0x00000000006c3852cbef3e08e8df289169ede581	0	0xfb0f3ee10000000000000000000000000000000000000000000000000000000000000020000000000000000000000000f75fd01d2262b07d92dca7f19bd6a3457060d7db000000000000000000000000000000000000000000000000000000000000126b0000000000000000000000000000000000000000000000000000000000000001000000000000000000000000a779f34a1aed6703dece431176abdae90037c0af000000000000000000000000004c00500000ad104d7dbd00e3ae0a5c00560c0000000…	16112653	0x384f49a657194e6e939bdd3d01d27e8310f06d9413320eeea3d10419dd8d5095
66903	0x5480e8f06d9d84e3c17c4d671dbe1110a4b3ac898c685790b722e7bc3c2ce489	0xdd750f2fc8845b0ca00be687dfc1cfd9e5131ce2	0x7492e30d60d96c58ed0f0dc2fe536098c620c4c0	0	0xefef39a10000000000000000000000000000000000000000000000000000000000000001	16112653	0x384f49a657194e6e939bdd3d01d27e8310f06d9413320eeea3d10419dd8d5095
66904	0x1d56c324f839bd244d23c5dee07c08ad695d0bba783db4e3e70c3b5a3b3bc8c8	0x08b1c0fbdb3c4e22a6448b3ce3fa825b61c81094	0x59728544b08ab483533076417fbbb2fd0b17ce3a	0	0x9e53a69a000000000000000000000000000000000000000000000000000000000000002000000000000000000000000000000000000000000000000000000000000000010000000000000000000000000000000000000000000000000000000000000000	16112653	0x384f49a657194e6e939bdd3d01d27e8310f06d9413320eeea3d10419dd8d5095
66905	0x65833f85744dee9e123b698f9d35e57b525ac051f0f754463b865a92ab1c8850	0xf16e9b0d03470827a95cdfd0cb8a8a3b46969b91	0x14da230d6726c50f759bc1838717f8ce6373509c	0	0xa9059cbb000000000000000000000000c64b013bd7b6e205da1a280b08ff0aef3c83134000000000000000000000000000000000000000000001181d335e14639a008000	16112653	0x384f49a657194e6e939bdd3d01d27e8310f06d9413320eeea3d10419dd8d5095
66906	0x1dde856291e6e634bf23137d2697af95403b311174332f8094bece1d8195267b	0xe68c0f7d18c3dbfcd7d5f94eb4608cb357215730	0x767fe9edc9e0df98e07454847909b5e959d7ca0e	0	0xa9059cbb00000000000000000000000028f666d387a915b7a154f79772cd7940f315c4c5000000000000000000000000000000000000000000000000026d6a725f991000	16112653	0x384f49a657194e6e939bdd3d01d27e8310f06d9413320eeea3d10419dd8d5095
66907	0xd186046cc9df0044b73b498bb3c4ddf3afbb63841818eb718fb96c5035565a4c	0xa9f7950903413eba0bd38346f8fc872242c589bd	0x68b3465833fb72a70ecdf485e0e4c7bd8665fc45	0	0x5ae401dc00000000000000000000000000000000000000000000000000000000638ccff3000000000000000000000000000000000000000000000000000000000000004000000000000000000000000000000000000000000000000000000000000000020000000000000000000000000000000000000000000000000000000000000040000000000000000000000000000000000000000000000000000000000000016000000000000000000000000000000000000000000000000000000000000000e404e45…	16112653	0x384f49a657194e6e939bdd3d01d27e8310f06d9413320eeea3d10419dd8d5095
66908	0x7d58016931f9bb498658e37ddf26286e0fd7f4395ae9637e8a9843c999cf0f81	0x6a5dbf2fb5206ec8192620810c3edb6d5e62b188	0xdac17f958d2ee523a2206206994597c13d831ec7	0	0xa9059cbb0000000000000000000000009a3d8bdb0fb665582d9dd83fa1116bc1546a5629000000000000000000000000000000000000000000000000000000012a3bfea5	16112653	0x384f49a657194e6e939bdd3d01d27e8310f06d9413320eeea3d10419dd8d5095
66909	0xd5ceeaca2656364ac36d8788572dee2a65caafecb456c76cffaa4e9c14a3e9b3	0x0037825fd75af7eeace28889665e3fac8fdb6300	0x626c27bcb7739ca923ff1c592dd1efebd4f7c829	0	0xca8bd1f902140100271027109410cf01dcdccdb9b56e285b39cea375e5e90883c02aaa39b223fe8d0a0e5c4f27ead9083c756cc200000126f227107a99822968410431edd1ee75dab78866e31caf39295b42684f90c77da7ea46336001010f2791ec8c0707c14b566b82480804300d66ce4fe68000000000	16112653	0x384f49a657194e6e939bdd3d01d27e8310f06d9413320eeea3d10419dd8d5095
66911	0xfb81bfd99f1b2139b01ebb435f240affbab85494e28ac94aafc5add706c7f0cb	0xa79d8b41dd38eef4c0a8f057b1450b150d2c51db	0x6b175474e89094c44da98b954eedeac495271d0f	0	0xa9059cbb00000000000000000000000092b0ace2561a406662e7008010281ff10753255100000000000000000000000000000000000000000000000168d28e3f00280000	16112653	0x384f49a657194e6e939bdd3d01d27e8310f06d9413320eeea3d10419dd8d5095
66912	0x096ea07dae189bde26b611c33944b3c2e571c0d2e5f855a282f389e9c9b66d9b	0xe5ecc117f6cdc4ecf5a82b90548ba02df63dd1af	0x68b3465833fb72a70ecdf485e0e4c7bd8665fc45	0	0x5ae401dc00000000000000000000000000000000000000000000000000000000638cd24b0000000000000000000000000000000000000000000000000000000000000040000000000000000000000000000000000000000000000000000000000000000100000000000000000000000000000000000000000000000000000000000000200000000000000000000000000000000000000000000000000000000000000104472b43f300000000000000000000000000000000000000000000000000018e3c4557c…	16112653	0x384f49a657194e6e939bdd3d01d27e8310f06d9413320eeea3d10419dd8d5095
66913	0xe2a50df1bfb77bb0bc1e3e75b785a8718ee9305f44218db9eeb497a8e5220372	0xf0475a1f184f062d1eee88f0d79ec4eb2795d4f0	0x81153f0889ab398c4acb42cb58b565a5392bba95	0	0x08bbb82400000000000000000000000000000000000000000000000000000000000000000000000000000000000000008305cda6ae133e5ced575dd6806234f328a1b572f44d93860000000000000000000000000000000000000000000000000491ecff30b5beb7000000000000000000000000d13cfd3133239a3c73a9e535a5c4dadee36b395c000000000000000000000000af95d3a7a25f831dc2b9a6704554435957b51ec20000000000000000000000000000000000000000000000000000000000000…	16112653	0x384f49a657194e6e939bdd3d01d27e8310f06d9413320eeea3d10419dd8d5095
66915	0x95d205bfd807ce0a306fd6cc26efce771c2fd76cd3c2f1f72570f02b65e80733	0x9e3aadc9ba267be3f2e3d7b1e0a02b0e265289b3	0x49cf6f5d44e70224e2e23fdcdd2c053f30ada28b	0	0xa22cb46500000000000000000000000000000000000111abe46ff893f3b2fdf1f759a8a80000000000000000000000000000000000000000000000000000000000000001	16112653	0x384f49a657194e6e939bdd3d01d27e8310f06d9413320eeea3d10419dd8d5095
66917	0x33bd86b6e77c35bf6b42afbcf7f223ed09bd9425115bc5b7421be98930b826b1	0x7f412e969accad7c58acc93a3b015db7f3f3a84f	0x00000000006c3852cbef3e08e8df289169ede581	4.1e+16	0xfb0f3ee1000000000000000000000000000000000000000000000000000000000000002000000000000000000000000000000000000000000000000000000000000000000000000000000000000000000000000000000000000000000000000000000000000000000000000000000000000000000000000000000000007f741f57513000000000000000000000000000bfacde4341f32b5f77ad81831e128ede4b5e6073000000000000000000000000004c00500000ad104d7dbd00e3ae0a5c00560c0000000…	16112653	0x384f49a657194e6e939bdd3d01d27e8310f06d9413320eeea3d10419dd8d5095
66919	0x60b9672f2c757905a39e2872bb079b79a2b686bba77d6518661048fe06fe8a9f	0xddb4bfacf01bcc012b130717f9a7b0a8e9fc24c5	0x50002cdfe7ccb0c41f519c6eb0653158d11cd907	2.01e+16	0xca23bb4cfa9ae2301efdf394a91810f11f4fd3cbee0949f47c119d824e6f5739eb9e587c00000000000000000000000000000000000000000000000000470de4df820000000000000000000000000000ddb4bfacf01bcc012b130717f9a7b0a8e9fc24c5000000000000000000000000000000000000000000000000000000000000000000000000000000000000000000000000000000000000000000000000000000a0000000000000000000000000000000000000000000000000000000000000006200020…	16112653	0x384f49a657194e6e939bdd3d01d27e8310f06d9413320eeea3d10419dd8d5095
66923	0x98f3ea8cc1edc1623588641fa60a5655631d440f39af8292fa3c08a530901cf8	0xb3b4d72becbc66dffb72a9eeb6741e38bfe19cfd	0x39da41747a83aee658334415666f3ef92dd0d541	4e+18	0x9a2b811500000000000000000000000000000000000000000000000000000000000000200000000000000000000000000000000000000000000000000000000000000001000000000000000000000000000000000000000000000000000000000000002000000000000000000000000000000000000000000000000000000000000000040000000000000000000000000000000000000000000000003782dace9d900000000000000000000000000000000000000000000000000000000000000000006000000…	16112653	0x384f49a657194e6e939bdd3d01d27e8310f06d9413320eeea3d10419dd8d5095
66924	0xdb11879d9d8fc8915e33f5d8b9e629255acd0b1d3a2b563c2c6a367a123c0a7e	0x09564716e12eb2ca51f64d07d76aa88b7cdc0283	0xeeeec6476073778077b40a73fe32e23a9876cab4	7.91e+16	0x2b66d72e000000000000000000000000000000000000000000000000000000000000002000000000000000000000000000000000000000000000000000000000000000ee65794a68624763694f694a46557a49314e694973496d74705a434936496a64684e6a526c5a6d51314c544a694e4463744e475a6a5a6931684f4463784c5445785a6d59354f5451345954646a4f434a392e436763784d6a597a4c6a513345674e56553051614a446b77595449785a6a517a4c54686b596a49744e4451785a6930345a4…	16112653	0x384f49a657194e6e939bdd3d01d27e8310f06d9413320eeea3d10419dd8d5095
66927	0x1d567e8c1a46b70508e86b95fa01aa6f2d56cfe0da8ebbc4fd77141be0a26959	0xda869be4adea17ad39e1dfece1bc92c02491504f	0x9008d19f58aabd9ed0d60971565aa8510560ab41	0	0x13d79a0b00000000000000000000000000000000000000000000000000000000000000800000000000000000000000000000000000000000000000000000000000000100000000000000000000000000000000000000000000000000000000000000018000000000000000000000000000000000000000000000000000000000000005a000000000000000000000000000000000000000000000000000000000000000030000000000000000000000006b175474e89094c44da98b954eedeac495271d0f00000…	16112652	0xdef705ed2ed08d5231a972b5b624a873733b6c2b28b7051c491c4ccaa90a856b
66929	0xc5dc5736920b01d209a182432cc8e68df5592b81547cce25de7af9def82b9549	0x7f04c4387423c5460f0a797b79b7de2a4769567a	0xcbfedfdb510ddfc193731758f9d5c34309912c7b	8.17e+17	0x	16112652	0xdef705ed2ed08d5231a972b5b624a873733b6c2b28b7051c491c4ccaa90a856b
66930	0x925efea59cf6c67e576ff019888d304d7a3475829e0bf7b438aaea46285f06d6	0x25b4c175a6a18e4f9e1160e3bde66c04624d4c69	0x5f50f4fbfb36ca515ea03eb5a60c5bc9f1078897	2.35e+16	0x	16112652	0xdef705ed2ed08d5231a972b5b624a873733b6c2b28b7051c491c4ccaa90a856b
66931	0xaf2c1cbdc1084602ebeb58f5de4146888752ddb84c33cdcd3955595ab0272487	0xc356c5ad75d6192fabf104d1bff4a16f09c229f7	0x365d87a8d31c656ed1479c0f54f19e3be9f19537	0	0x23b872dd000000000000000000000000c356c5ad75d6192fabf104d1bff4a16f09c229f7000000000000000000000000abd9c88340382f0630db83ba58993bc1cc8f89530000000000000000000000000000000000000000000000000000000000001099	16112652	0xdef705ed2ed08d5231a972b5b624a873733b6c2b28b7051c491c4ccaa90a856b
66932	0xf174ee7462b76cbe6474f3de7873fc606b3f6b8ae9e6afd5b5a62428de3099de	0xb1d623c5c6bc228df82f08356247c01a0b2a08eb	0xf9ffb0c9d3a6f32a54e965882b7e85c77e3bfe74	0	0xa22cb4650000000000000000000000001e0049783f008a0085193e00003d00cd54003c710000000000000000000000000000000000000000000000000000000000000001	16112652	0xdef705ed2ed08d5231a972b5b624a873733b6c2b28b7051c491c4ccaa90a856b
66937	0xa530ab0a259afd65a2ea9e1f37ff3a715bbfabe872f975f2961e834513378d0c	0x6610723ab30594192d705e64acba702bbdde02d7	0x6610723ab30594192d705e64acba702bbdde02d7	50000000000000	0x	16112652	0xdef705ed2ed08d5231a972b5b624a873733b6c2b28b7051c491c4ccaa90a856b
66939	0x874507f5bb3d505614010320c30d3344a880005955483341b7a88a526306fca9	0xf7c4319d878a48629e2c39fe1e75f2df080775a0	0xc6dca8e9c9eb5a7eb68b04a69e63352d5d98695c	0	0xf242432a000000000000000000000000f7c4319d878a48629e2c39fe1e75f2df080775a0000000000000000000000000993c320bd0e776fc6d27425d44311bc2c0a1f9960000000000000000000000000000000000000000000000000000000000002e23000000000000000000000000000000000000000000000000000000000000000100000000000000000000000000000000000000000000000000000000000000a0000000000000000000000000000000000000000000000000000000000000000000000…	16112652	0xdef705ed2ed08d5231a972b5b624a873733b6c2b28b7051c491c4ccaa90a856b
66940	0x1148e1c2c3791c76a9464c8024be141429d853bc2b5f4c7560a2c63d8de7ec48	0x823b5d2e706911a34010c6f71a9991292b25fc7e	0x194510bf47a94247b66423819584df17b9db144d	2000000000000000	0x	16112652	0xdef705ed2ed08d5231a972b5b624a873733b6c2b28b7051c491c4ccaa90a856b
66941	0x43211ad3385c3929a6c3ec274b778a4d5dc975168112e25adfd8d66fca1e698a	0xedd53ac6247d2924c0b16a3079f229d98ec0ba66	0xdd750f2fc8845b0ca00be687dfc1cfd9e5131ce2	2370000000000000	0x	16112652	0xdef705ed2ed08d5231a972b5b624a873733b6c2b28b7051c491c4ccaa90a856b
66942	0xfc394a0233cdb79ca102169a54dc622f4577863df912a72b0c8e66b1d6f967ad	0x747dbfbcfb74fd5fc115896c758a2fdff581c702	0x283af0b28c62c092c9727f1ee09c02ca627eb7f5	0	0xf14fcbc89f0fff7850472e108c6370faa36b3d0dcfd558f88d18f2f29beaeb22c2bfaeac	16112652	0xdef705ed2ed08d5231a972b5b624a873733b6c2b28b7051c491c4ccaa90a856b
66943	0x58d3e173f77ff8cbec5723f7029a81115de183654d883bdc04287303dabf0255	0x70fb7a87512ec7cf701767463af2e5741a67ce3e	0xc02aaa39b223fe8d0a0e5c4f27ead9083c756cc2	0	0x2e1a7d4d0000000000000000000000000000000000000000000000003ed6d826b97e4f36	16112652	0xdef705ed2ed08d5231a972b5b624a873733b6c2b28b7051c491c4ccaa90a856b
66944	0xad468acad3fcbe36c0d6a35c5d68dcb17098c792d7b925d6c187b1dc36ee7a74	0xc89624078e4348b5ad5c117cedc8ea2fe78b4816	0xdac17f958d2ee523a2206206994597c13d831ec7	0	0xa9059cbb000000000000000000000000f9b7f2d589109f66328d7d4bc3f5b79f30ac69a1000000000000000000000000000000000000000000000000000000000a3c6450	16112652	0xdef705ed2ed08d5231a972b5b624a873733b6c2b28b7051c491c4ccaa90a856b
66945	0x7ff655f392f22f1663ddfce13cfef8606e18596f860100275f7934b544158ca8	0xbfaab38f26454cf5ae0570436415d4ad94336f43	0x0391d2021f89dc339f60fff84546ea23e337750f	0	0x095ea7b3000000000000000000000000a3a7b6f88361f48403514059f1f16c8e78d60eecffffffffffffffffffffffffffffffffffffffffffffffffffffffffffffffff	16112652	0xdef705ed2ed08d5231a972b5b624a873733b6c2b28b7051c491c4ccaa90a856b
66947	0xd870010ce993c1a4009589fc2af55f492b2e2f9a5cd844aef422bc04f3bcfe9a	0x665e6a247e90e35bfd480d46e3db33fb593ff77a	0x68b3465833fb72a70ecdf485e0e4c7bd8665fc45	8.5e+16	0x5ae401dc00000000000000000000000000000000000000000000000000000000638ccc7b00000000000000000000000000000000000000000000000000000000000000400000000000000000000000000000000000000000000000000000000000000001000000000000000000000000000000000000000000000000000000000000002000000000000000000000000000000000000000000000000000000000000000e4472b43f3000000000000000000000000000000000000000000000000012dfb0cb5e88…	16112652	0xdef705ed2ed08d5231a972b5b624a873733b6c2b28b7051c491c4ccaa90a856b
66948	0xe6e4f702515958d58dad30ada506f166fa5c41c5e2b814413e35a3d1247763be	0x24affae9c683b7615d4130300288e348e4b5d091	0x5050e08626c499411b5d0e0b5af0e83d3fd82edf	64006	0x78e111f60000000000000000000000005432dfebdf380285ba7a2f8906d4e3c73795c6d3000000000000000000000000000000000000000000000000000000000000004000000000000000000000000000000000000000000000000000000000000000c404764a8a000000000000000000000000000000000000000000000000ffd21ff0cddd28c1000000000000000000000000000000000000000000000000118ac122a6a930000000000000000000000000000000000000000000000254a2522051da2ff72…	16112652	0xdef705ed2ed08d5231a972b5b624a873733b6c2b28b7051c491c4ccaa90a856b
66949	0x9580a124e19b425f5204d29df2727735f2370b90c739f7845d1876fa367cc184	0xd16e4cdb153b2dcc617061174223a6d4bfae53f5	0x95ad61b0a150d79219dcf64e1e6cc01f0b64c4ce	0	0xa9059cbb000000000000000000000000e6a6018241d0bf071f56e5a216dd172f6ac221e000000000000000000000000000000000000000000017eba15b967722c19a0000	16112652	0xdef705ed2ed08d5231a972b5b624a873733b6c2b28b7051c491c4ccaa90a856b
66950	0xc9c0fbe9957eea4e96becd1f98f4328a47eb137078cfef3953f70a59f02c113a	0x6887246668a3b87f54deb3b94ba47a6f63f32985	0x5e4e65926ba27467555eb562121fac00d24e9dd2	0	0xd0f893440002b41cc30000bd0000060000000000000000000000000000000000005d00000000638ccb3a0000f5dbd600000900000000638ccb3a0000f5dbd800004a00000000638ccb490000f5dbd800000800000000638ccb490000f5dbd900000500000000638ccb580000f5dbd9789cec7d773cd5fdfbff19f6c8de915d88cc738eecad28247bef3db2251c7bef3de22db2672964948c8cc868889450a28832137e8f9beefba3cf8773eeeeeef1fb7c1f9feb2fef7379ed755dcfeb7a5d2f10e8c3fa5ce05…
66953	0x36446dd2f77f31637900ff5412a626d9c85d1c59e2ae79fad73b5153a6017623	0xbc5d9c6458b3746229ae889b8d6b14232b48e87f	0x68b3465833fb72a70ecdf485e0e4c7bd8665fc45	0	0x5ae401dc00000000000000000000000000000000000000000000000000000000638cd24b000000000000000000000000000000000000000000000000000000000000004000000000000000000000000000000000000000000000000000000000000000020000000000000000000000000000000000000000000000000000000000000040000000000000000000000000000000000000000000000000000000000000016000000000000000000000000000000000000000000000000000000000000000e4472b4…	16112652	0xdef705ed2ed08d5231a972b5b624a873733b6c2b28b7051c491c4ccaa90a856b
66955	0xf8705da65e565b8c824e62f2739e9dfd537e89ff64154cec13cc9111c8a8881b	0x4f7ea98abd9ef5c35dd778dd4f6a9ed43fa00f23	0x99992c0b03f7e9ff5ca14bdf5eec67deabfbcda6	1.34e+18	0x	16112652	0xdef705ed2ed08d5231a972b5b624a873733b6c2b28b7051c491c4ccaa90a856b
66956	0x66d0f41c0e746d118ff6964661260d11dbda60e3d02147185493c2112892a3cd	0xbb2f4b2f9e07c94da18744d3a61ff4c1163d451d	0x66293a9b1339ca99623e82bc71f88d767f60ad21	0	0x42842e0e000000000000000000000000bb2f4b2f9e07c94da18744d3a61ff4c1163d451d000000000000000000000000ae9b00d6d638f1c96afbcf54f02e941df47a7bff00000000000000000000000000000000000000000000000000000000000001e1360c6ebe	16112652	0xdef705ed2ed08d5231a972b5b624a873733b6c2b28b7051c491c4ccaa90a856b
66957	0xd208b436bcd66e97f268e9137905a1a66b8b93ada36411bf22728c5323fd55ea	0x6b1b0a4216c8500812dbdc0b4d7bd22a4b214977	0x7aae2b569a8a0e27666d2b01ca8b88547b6e28e0	2e+17	0x	16112652	0xdef705ed2ed08d5231a972b5b624a873733b6c2b28b7051c491c4ccaa90a856b
66961	0x57d64e392c197b370ddd1bd024cdeaf1d1d7ed5075bb44c9f8efb88680dd9761	0xf29f568f971c043df7079a3121e9de616b8998a3	0x1111111254eeb25477b68fb85ed929f73a960582	0	0x12aa3caf0000000000000000000000003b17056cc4439c61cea41fe1c9f517af75a978f7000000000000000000000000476c5e26a75bd202a9683ffd34359c0cc15be0ff000000000000000000000000dac17f958d2ee523a2206206994597c13d831ec70000000000000000000000003b17056cc4439c61cea41fe1c9f517af75a978f7000000000000000000000000f29f568f971c043df7079a3121e9de616b8998a30000000000000000000000000000000000000000000000000000000253ed5fbd00000…	16112652	0xdef705ed2ed08d5231a972b5b624a873733b6c2b28b7051c491c4ccaa90a856b
66966	0x96ed83c48910ef2437d7f727d90fb117e36dc720e306fe80da16e5088ff4b5dd	0xd6aa8cd7ec12f2ee63ad54d33518d10cfa0aef0e	0x68b3465833fb72a70ecdf485e0e4c7bd8665fc45	2.9e+16	0x5ae401dc00000000000000000000000000000000000000000000000000000000638cd23f00000000000000000000000000000000000000000000000000000000000000400000000000000000000000000000000000000000000000000000000000000001000000000000000000000000000000000000000000000000000000000000002000000000000000000000000000000000000000000000000000000000000000e4472b43f300000000000000000000000000000000000000000000000000670758aa7c8…	16112652	0xdef705ed2ed08d5231a972b5b624a873733b6c2b28b7051c491c4ccaa90a856b
66967	0xd5d8435f7c5509cbd9157738326a27260dc425eebaa1df26225076203f97b354	0x876e401053c9e892f47fb29eb6d1bdb0ea610362	0x7492e30d60d96c58ed0f0dc2fe536098c620c4c0	0	0xefef39a10000000000000000000000000000000000000000000000000000000000000001	16112652	0xdef705ed2ed08d5231a972b5b624a873733b6c2b28b7051c491c4ccaa90a856b
66968	0x58d67ff51919d912789e532718d8c7012f60642567837531121efd2eb0486d95	0x80c67432656d59144ceff962e8faf8926599bcf8	0x1589a1bc577a3be92cf461d0e0c05fa6d3d39a62	1.2e+17	0x	16112652	0xdef705ed2ed08d5231a972b5b624a873733b6c2b28b7051c491c4ccaa90a856b
66969	0xce8fbda090e3d5cfee012bcd97896f54aa073a91c75970092caf45f401456855	0x1a8ed0d3ad42c9019cc141aace7e5fb6e576b917	0x5a54fe5234e811466d5366846283323c954310b2	0	0x46f83b50000000000000000000000000000000000000000000000000000000000000006eeffa03c24314cddd34c2ea70b9416ea40daa08c42d38dff0132ce2c5d1e3d2a600000000000000000000000000000000000000000000000000000000000000144b256f8d999ba70101e3ef67bfa9f2118afab6cf7da409aab4c475c8efe705f9	16112652	0xdef705ed2ed08d5231a972b5b624a873733b6c2b28b7051c491c4ccaa90a856b
66970	0x5a1e0b4050b9aa6a49d79d255b67a705726e3dff16364e1aa2e2cefcbe398ce5	0xb846d122341d23e8822ee4c693aeb02d94c50b33	0xa24db65ae152fdbea50d2dc96fea8ace60c345d2	8.52e+16	0x	16112652	0xdef705ed2ed08d5231a972b5b624a873733b6c2b28b7051c491c4ccaa90a856b
66971	0x3378d0506bddaf29c04681a0ed46c384e219e487014d7e3c02cc7d88c63039c1	0x21a31ee1afc51d94c2efccaa2092ad1028285549	0xaad5af7a27f747d4d6a9892281d58e7279d7434e	9230000000000000	0x	16112652	0xdef705ed2ed08d5231a972b5b624a873733b6c2b28b7051c491c4ccaa90a856b
66972	0x7ea20dbe786d5fa13b878cb8bd19ff1eab3f5e6052096f79b3e201e1b3f14442	0xa299c04eb002e667bcb6c0d38a024eb5022a5e1a	0x8addb5567fdccc62bc9065964ce841a82307fe31	902000000000000	0x	16112652	0xdef705ed2ed08d5231a972b5b624a873733b6c2b28b7051c491c4ccaa90a856b
66973	0xdaeddcb5195f364cf81616a2845daf55180a99a7c489f64e0141b007423f324d	0x56eddb7aa87536c09ccc2793473599fd21a8b17f	0xdac17f958d2ee523a2206206994597c13d831ec7	0	0xa9059cbb0000000000000000000000008a38b9d9f0fba9401dc066a516ae30023d2ab2ff000000000000000000000000000000000000000000000000000000009b050f00	16112652	0xdef705ed2ed08d5231a972b5b624a873733b6c2b28b7051c491c4ccaa90a856b
66977	0xc5ed092aaa0764ea2f2455c059bc9581ae967d22b030a6da92f8d8f03139b455	0x3998496b42f01e586ede2185269b35a06dd725f0	0x172401c05a6f9d569d731f747d3bfd66b1c68e54	0	0x095ea7b30000000000000000000000007a250d5630b4cf539739df2c5dacb4c659f2488dffffffffffffffffffffffffffffffffffffffffffffffffffffffffffffffff	16112652	0xdef705ed2ed08d5231a972b5b624a873733b6c2b28b7051c491c4ccaa90a856b
66978	0x0ebe4201028a1de246174566b5661c20f8ae90e098f3dc8b4216a54637053455	0x28c6c06298d514db089934071355e5743bf21d60	0xdac17f958d2ee523a2206206994597c13d831ec7	0	0xa9059cbb000000000000000000000000af42770ae98c747145956ab120388ed8d2d15df70000000000000000000000000000000000000000000000000000000147a28300	16112652	0xdef705ed2ed08d5231a972b5b624a873733b6c2b28b7051c491c4ccaa90a856b
66979	0x928b5bcd7e486ed405a784c1813fb9bc52eea163e6a597d2474e87a3c328608a	0x21a31ee1afc51d94c2efccaa2092ad1028285549	0xdac17f958d2ee523a2206206994597c13d831ec7	0	0xa9059cbb00000000000000000000000036b93fa271b7ff9531a252ada0908a4a34d33bb5000000000000000000000000000000000000000000000000000000000372f651	16112652	0xdef705ed2ed08d5231a972b5b624a873733b6c2b28b7051c491c4ccaa90a856b
66981	0xebccbbdf9b1b9282493b744c938e95c835d0db489364931a6ff6b60c547748a3	0x9696f59e4d72e237be84ffd425dcad154bf96976	0xdac17f958d2ee523a2206206994597c13d831ec7	0	0xa9059cbb000000000000000000000000ab77fec25824a25aaeef3e40a910b556a41a084100000000000000000000000000000000000000000000000000000000401332c0	16112652	0xdef705ed2ed08d5231a972b5b624a873733b6c2b28b7051c491c4ccaa90a856b
66983	0x7ce0a9a8eb718afd92ef2f9d19c6c7cb1a8e05fad740d431b452df17532c765c	0x80c67432656d59144ceff962e8faf8926599bcf8	0xa55e16beda0b285d185ce6e8a0cf239df0928f2d	1.5e+16	0x	16112652	0xdef705ed2ed08d5231a972b5b624a873733b6c2b28b7051c491c4ccaa90a856b
66987	0x4a318093589cb28c810e8a15f35806ab758698b0097139daad295f31bf1ab78a	0xdb044b8298e04d442fdbe5ce01b8cc8f77130e33	0x60d35b53b72be8aafb48950c2a2080d583541412	1.62e+18	0x	16112652	0xdef705ed2ed08d5231a972b5b624a873733b6c2b28b7051c491c4ccaa90a856b
66989	0x167b96c5d85c4958cb4ea5969b77f1604becc4a57cff2305b742dab1eca3e697	0x0eb6a9d27a8c2874cbeb4b54bc69f09fb2d5c3ca	0x96612f42f31eaea7f6c53f2655eec4f3d24d30c5	1500000000000000	0x	16112652	0xdef705ed2ed08d5231a972b5b624a873733b6c2b28b7051c491c4ccaa90a856b
66991	0x52ed4c1b22f988561be5381812279da314572b4626646c68bc7f776675d79e26	0x36e36ca99218d21b444b5068dc6ed0c907119651	0x7d2768de32b0b80b7a3454c06bdac94a69ddc7a9	0	0xe8eda9df000000000000000000000000d533a949740bb3306d119cc777fa900ba034cd5200000000000000000000000000000000000000000000000002c68af0bb14000000000000000000000000000036e36ca99218d21b444b5068dc6ed0c9071196510000000000000000000000000000000000000000000000000000000000000000	16112652	0xdef705ed2ed08d5231a972b5b624a873733b6c2b28b7051c491c4ccaa90a856b
66992	0xe663aee4d58749c152f723ea7b075c2044076ce74134677481cef423fe2b55e2	0xcc93d572c81e3742759005ab7356a8f4e11738e8	0x68b3465833fb72a70ecdf485e0e4c7bd8665fc45	6.77e+16	0x5ae401dc00000000000000000000000000000000000000000000000000000000638cd23f000000000000000000000000000000000000000000000000000000000000004000000000000000000000000000000000000000000000000000000000000000020000000000000000000000000000000000000000000000000000000000000040000000000000000000000000000000000000000000000000000000000000016000000000000000000000000000000000000000000000000000000000000000e45023b…	16112652	0xdef705ed2ed08d5231a972b5b624a873733b6c2b28b7051c491c4ccaa90a856b
66995	0x28d3c24a33add8ee55540cd9814d6c3b9df88575db975f79adeeb58c55ad5f73	0x9f0388592d978917e78fd30721e60121ad272829	0x59728544b08ab483533076417fbbb2fd0b17ce3a	4e+16	0xb4e4b2960000000000000000000000000000000000000000000000000000000000000040000000000000000000000000000000000000000000000000000000000000012000000000000000000000000000000000000000000000000000000000000000000000000000000000000000009f0388592d978917e78fd30721e60121ad272829000000000000000000000000000000000000000000000000008e1bc9bf040000000000000000000000000000000000000000000000000000000000000000063f00000…	16112652	0xdef705ed2ed08d5231a972b5b624a873733b6c2b28b7051c491c4ccaa90a856b
66998	0x78b8a0f2ee99098b688418053b420301ab7d24ddd87ac2a624acbdbbf30a9990	0x9d808b40f2c5847b02efbf6c1cf9cf2445b1df56	0x491f6b412810434a8fac3aa5f77a90a821405d6c	2000000000000000	0x	16112652	0xdef705ed2ed08d5231a972b5b624a873733b6c2b28b7051c491c4ccaa90a856b
67000	0x9057916508004472b0ec1ba2ee27e41d72dd8715c486823ff8dc306d6026ebc5	0x8c241750f13f0f6d2e95de5fb4a77e13b4fa730a	0x0554f068365ed43dcc98dcd7fd7a8208a5638c72	0	0xc6760f6b000000000000000000000000000000000000000000000000000000000000006000000000000000000000000000000000000000000000000000000000000000a000000000000000000000000000000000000000000000000000000000000000e000000000000000000000000000000000000000000000000000000000000000010000000000000000000000000000000000000000000000000000000000000001000000000000000000000000000000000000000000000000000000000000000100000…	16112652	0xdef705ed2ed08d5231a972b5b624a873733b6c2b28b7051c491c4ccaa90a856b
67003	0x0a7d3a21bfeb98b881504725ed2ee024d9a1793f14a8f65df766a9290051657b	0x68b001552480932276cf9d5f4fff57877cec14a7	0x2014ce7b64ce6c2c4b9e7289db430823412cc8ea	0	0x38d074360000000000000000000000000000000000000000000000092400f07f1bee61720000000000000000000000000000000000000000000000000000000000000001	16112652	0xdef705ed2ed08d5231a972b5b624a873733b6c2b28b7051c491c4ccaa90a856b
67005	0x5395a0db5ecf4f6dd2a6bf472034f7f1bc75d1da4eaeaee4ae0d1529384dd7dd	0x95222290dd7278aa3ddd389cc1e1d165cc4bafe5	0x4675c7e5baafbffbca748158becba61ef3b0a263	2.86e+16	0x	16112652	0xdef705ed2ed08d5231a972b5b624a873733b6c2b28b7051c491c4ccaa90a856b
67006	0x1e8dbb00c93d04b41b9d3e4add2b6f5fe99a3037ee51846e9be4f8358ad91c78	0x7b82b45964d20ee4010917d7fdb20b606032e1af	0x4dbd4fc535ac27206064b68ffcf827b0a60bab3f	1.08e+18	0x439370b1	16112652	0xdef705ed2ed08d5231a972b5b624a873733b6c2b28b7051c491c4ccaa90a856b
67007	0x874af7083458ede90789fd687271f341d85eadf942e68f535d2364d11eddcd00	0xce26af026c376f873732e1e5f0cff4284651f0c9	0xdac17f958d2ee523a2206206994597c13d831ec7	0	0xa9059cbb00000000000000000000000074d266712684eb03685a15c97bc02394bb2e93b500000000000000000000000000000000000000000000000000000000334ea976	16112652	0xdef705ed2ed08d5231a972b5b624a873733b6c2b28b7051c491c4ccaa90a856b
67008	0xa095810a4b66f16333d88a830810e9f1fb252afdef0c0477a407489dd5d7d410	0x0489d95f78ea796c353e326aa86155a3492dc4ac	0x7659ce147d0e714454073a5dd7003544234b6aa0	0	0xa9059cbb000000000000000000000000bc93b70b0e4b5b72e5943fb3a086e0d5c14ce135000000000000000000000000000000000000000000000008db960be2fb8c0000	16112652	0xdef705ed2ed08d5231a972b5b624a873733b6c2b28b7051c491c4ccaa90a856b
67010	0xf108ea1200e994b2650c28e43ab72ab053147a95f4f2a8985cd5646ffe2989e9	0x2dfbd26290e62774bea0edac02bf621c7feef0dd	0x38d8ac80ebb7a0e291ec72284099d76082d21712	6420000000000000	0x	16112652	0xdef705ed2ed08d5231a972b5b624a873733b6c2b28b7051c491c4ccaa90a856b
67011	0x4c90bcd9205a2898f0c09b6541961cc6ac9e2cd04522dd93e5fb3fa6bf41527d	0xfb9779477e5b4834bf2bc02dd29b97b344d0f700	0xa69babef1ca67a37ffaf7a485dfff3382056e78c	42246	0x1cff79cd000000000000000000000000fc588723ead01d032b837229577f6a532e5a0c20000000000000000000000000000000000000000000000000000000000000004000000000000000000000000000000000000000000000000000000000000000c404764a8a00000000000000000000000000000000000000000000000688e7ca3817f1fdcf000000000000000000000000000000000000000000000000118b39d8ca299d000000000000000000000000000000000000006dd64ca2c713b415e953c57f6…	16112652	0xdef705ed2ed08d5231a972b5b624a873733b6c2b28b7051c491c4ccaa90a856b
67012	0xd6ad708aa142987a1d4afbc6d7cac1d2950f008baf9bfdbf7232f25d4ca0fa40	0x03671b7c11cb749de612bb460cef8bc3f6e6db06	0xf2a0ef4672d76403b90dc7d7dd8d12c4f9d013b3	0	0xcac40eb00000000000000000000000000000000000000000000000000000000000000060000000000000000000000000000000000000000000000000000000000000030000000000000000000000000000000000000000000000000000000000000005a000000000000000000000000000000000000000000000000000000000000000140000000000000000000000000000000000000000000000000000000000000002000000000000000000000000000000000000000000000000000000000000000100000…	16112652	0xdef705ed2ed08d5231a972b5b624a873733b6c2b28b7051c491c4ccaa90a856b
67013	0x047bf2c4750b5a86a8e822adbc66a48fd04d008a9e83cf2abf22db63666e1c41	0x28c6c06298d514db089934071355e5743bf21d60	0xf7a17021abc833c012d93621839e35d4689b50bd	1.43e+17	0x	16112652	0xdef705ed2ed08d5231a972b5b624a873733b6c2b28b7051c491c4ccaa90a856b
67019	0x7ffc18a01fd1fd9e9d3429fa5379f2d9df16852778092037a3feb46071c9ed60	0x4976a4a02f38326660d17bf34b431dc6e2eb2327	0x66133e72c73b665e4f654928eb38a9e03ad7eafb	4.1e+18	0x	16112652	0xdef705ed2ed08d5231a972b5b624a873733b6c2b28b7051c491c4ccaa90a856b
67021	0x262b4d6772ccb6c09c112f1703ed901b2d75594023a4a02d658ebc5af1852421	0xab27f95dc5fac59c31bb5caa04d83071b0c24cc0	0x8a9e9963a5545ccf398d56430f8ee92f5d083347	9.84e+17	0x	16112652	0xdef705ed2ed08d5231a972b5b624a873733b6c2b28b7051c491c4ccaa90a856b
67022	0x29ad2510d655ff1a6c23c4d2bba94d9d727fbf8884ea619764ec0f8ae0c3f9ab	0x9696f59e4d72e237be84ffd425dcad154bf96976	0xb1640dc8694d4160bf815f9caec63c79b4b268a9	1.03e+16	0x	16112652	0xdef705ed2ed08d5231a972b5b624a873733b6c2b28b7051c491c4ccaa90a856b
67024	0x09bb6be21b822e678bba306f3fc14d3da6b6d19a712f79d6fbc9b811a2d6bb7c	0xe95f6604a591f6ba33accb43a8a885c9c272108c	0x7a410984eaf95b77625da95ae4f70002863bfc85	2.13e+17	0x	16112652	0xdef705ed2ed08d5231a972b5b624a873733b6c2b28b7051c491c4ccaa90a856b
67025	0xb18c48938ba0d4c1b974b9521ee3482249ed87f3dc3ccd40cf765bc3d945ac76	0xf40b45fe0b6db563ddc5ec217850d997e4093479	0xaf3218cc37011bc6a62d52f70a275d6cf9d4c472	9960000000000000	0x	16112652	0xdef705ed2ed08d5231a972b5b624a873733b6c2b28b7051c491c4ccaa90a856b
67027	0x68d9fa070ce8ae04c3d4897b8cd3c23c1c2ad8b807fc80c4690ec96dbd73c5c5	0xe001a00fce9622836c2594a393a1a50dec13085b	0x72ce9c846789fdb6fc1f34ac4ad25dd9ef7031ef	234000000000000	0xd2ce7d65000000000000000000000000a0b86991c6218b36c1d19d4a2e9eb0ce3606eb48000000000000000000000000e001a00fce9622836c2594a393a1a50dec13085b000000000000000000000000000000000000000000000000000000001e19b04000000000000000000000000000000000000000000000000000000000000432380000000000000000000000000000000000000000000000000000000011e1a30000000000000000000000000000000000000000000000000000000000000000c000000…	16112652	0xdef705ed2ed08d5231a972b5b624a873733b6c2b28b7051c491c4ccaa90a856b
67028	0xa29b76fa07589ca270db358bd07dcfce0edb7035c7d49035bc7b1d9d79224dc4	0xfd25f5a3415e29f0aeeb5746e5d513de67169225	0x05237e2bd2dfab39a135d254cabae94b183c8bad	0	0xa9059cbb000000000000000000000000fab5601d52cf32ad2846ffc614c265b80a3b570600000000000000000000000000000000000000000000000000000049bcca7f00	16112652	0xdef705ed2ed08d5231a972b5b624a873733b6c2b28b7051c491c4ccaa90a856b
67029	0x5c8f892fa6e7b7eb72989291db29ae594353ffd4753efd0a93818101cbd1c2b1	0xb51641a888474d1a3a6143a73bb3103e77f4c1ff	0x76f4eed9fe41262669d0250b2a97db79712ad855	3.35e+19	0xf17a454600000000000000000000000000000000000000000000000000000000000000c000000000000000000000000000000000000000000000000000000000000001a0000000000000000000000000000000000000000000000001d11063cf3cb63e5500000000000000000000000000000000000000000000000000000000000000010000000000000000000000001d64fb0ffa8362b2e1ee7ee03929159551eab26e000000000000000000000000000000000000000000000000000000000000022000000…	16112652	0xdef705ed2ed08d5231a972b5b624a873733b6c2b28b7051c491c4ccaa90a856b
67032	0x83b523af179bcabdf4c726be21ef872352650a8da6edc516f74ed980ab5b5443	0x85b44a83bca937e844bdc290284ef6b11bc015ba	0x853d955acef822db058eb8505911ed77f175b99e	0	0x095ea7b30000000000000000000000003835a58ca93cdb5f912519ad366826ac9a752510ffffffffffffffffffffffffffffffffffffffffffffffffffffffffffffffff	16112652	0xdef705ed2ed08d5231a972b5b624a873733b6c2b28b7051c491c4ccaa90a856b
67033	0x140e046381433eecf31fb511dd522367a80997384889241dc9a18f4c47943917	0xc6aef6a50fb98056dd19fec5875d68a29457bceb	0x7d655c57f71464b6f83811c55d84009cd9f5221c	3150000000000000	0x9120491c00000000000000000000000000000000000000000000000000000000000000200000000000000000000000000000000000000000000000000000000000000004000000000000000000000000eeeeeeeeeeeeeeeeeeeeeeeeeeeeeeeeeeeeeeee00000000000000000000000000000000000000000000000000038d7ea4c6800000000000000000000000000001d79bceaeaadfb8fd2f2f53005289cfcf483464000000000000000000000000eeeeeeeeeeeeeeeeeeeeeeeeeeeeeeeeeeeeeeee00000…	16112652	0xdef705ed2ed08d5231a972b5b624a873733b6c2b28b7051c491c4ccaa90a856b
67034	0xc128615543cfb9020d16386dbe5f28720bc644a1f8186d40be7df71ad92b94f5	0x4bcb66c5580ae6e8d2064d65f0e04c66c5b65ea2	0xf89d7b9c864f589bbf53a82105107622b35eaa40	6.17e+16	0x	16112652	0xdef705ed2ed08d5231a972b5b624a873733b6c2b28b7051c491c4ccaa90a856b
67036	0x0f071874c9e0bc080484c3331570a1fe35d9104421751052f90876fa4508e06b	0x0cac3d1a887206e0f6169222c4504301a8b4b993	0xa69babef1ca67a37ffaf7a485dfff3382056e78c	40981	0x1cff79cd00000000000000000000000031ec7d43b2aec8600d6ed6d8ca330d591315151a000000000000000000000000000000000000000000000000000000000000004000000000000000000000000000000000000000000000000000000000000000c402d48983000000000000000000000000000000000000000000000000ffd21ff0cddd28c1000000000000000000000000000000000000000000000000118ac122a6a930000000000000000000000000000000000000000000000254a2522051da2ff72…	16112652	0xdef705ed2ed08d5231a972b5b624a873733b6c2b28b7051c491c4ccaa90a856b
67038	0x0e66ea1c541b9707eb463b978adf7bdec30bf086d2cb339f133fc975b1bad9bf	0xaa82dbaaba4a9f682a379a3b079c47e445f22d2d	0xdac17f958d2ee523a2206206994597c13d831ec7	0	0x095ea7b300000000000000000000000068b3465833fb72a70ecdf485e0e4c7bd8665fc45ffffffffffffffffffffffffffffffffffffffffffffffffffffffffffffffff	16112652	0xdef705ed2ed08d5231a972b5b624a873733b6c2b28b7051c491c4ccaa90a856b
67041	0x277fd7c5001a67bf125a90ff20ea85539043fdd2eb52576590c8b2d8b0c6d78f	0x61451cdf1b0fc61074579abf6b540ffa3274a542	0x881d40237659c251811cec9c364ef91dc08d300c	4.5e+17	0x5f57552900000000000000000000000000000000000000000000000000000000000000800000000000000000000000000000000000000000000000000000000000000000000000000000000000000000000000000000000000000000063eb89da4ed000000000000000000000000000000000000000000000000000000000000000000c000000000000000000000000000000000000000000000000000000000000000136f6e65496e6368563446656544796e616d69630000000000000000000000000000000…	16112652	0xdef705ed2ed08d5231a972b5b624a873733b6c2b28b7051c491c4ccaa90a856b
67042	0x0e5b85ed9a60523fcb4561fd78036b3aa1dbe7c316f50bb656251bd99d551f7c	0xc53f5a27021455293aa34da308280abc4cad210a	0xdac17f958d2ee523a2206206994597c13d831ec7	0	0xa9059cbb0000000000000000000000005ad3b133e48ca26a97cb5272a62161d80f54533d00000000000000000000000000000000000000000000000000000016e0280680	16112652	0xdef705ed2ed08d5231a972b5b624a873733b6c2b28b7051c491c4ccaa90a856b
67050	0x0a0f06abf16ad263398439e3f25fee4b69b9db71b3eda90ae7a4bdba9b682abb	0x7830c87c02e56aff27fa8ab1241711331fa86f43	0xa9d1e08c7793af67e9d92fe308d5697fb81d3e43	0	0x1a1da075000000000000000000000000000000000000000000000000000000000000004000000000000000000000000000000000000000000000000000000000000156940000000000000000000000000000000000000000000000000000000000000004000000000000000000000000dea059f5ff4a038ee91b2709f7b30945c03f77800000000000000000000000000000000000000000000000000005646509a780000000000000000000000000006beebd79b371beeb0db13f31030f9c05194f2d0000000…	16112651	0xbbd5a308c9781f0b9e4c3f4810aeb99d4576cd5bba3fb7716b2f780cc5f2b18e
67052	0x896f92a3318f03312f639f3701037b7d0dc29200ee7ed80ee9855a5c94ab7581	0xddfabcdc4d8ffc6d5beaf154f18b778f892a0740	0x66a6ebe41e715255ad4ced857140f10df7812b11	8720000000000000	0x	16112651	0xbbd5a308c9781f0b9e4c3f4810aeb99d4576cd5bba3fb7716b2f780cc5f2b18e
67057	0x9dcd5f1fd2ef05160f4e9791e34e60ba77ad2a5b627cd124e169a80e12ebff7d	0xd24400ae8bfebb18ca49be86258a3c749cf46853	0x5f65f7b609678448494de4c87521cdf6cef1e932	0	0xfa558b710000000000000000000000004fabb145d64652a948d72533023f6e7a623c7c53000000000000000000000000000000000000000000000000000000000000006000000000000000000000000000000000000000000000000000000000000000a000000000000000000000000000000000000000000000000000000000000000010000000000000000000000007a245c2c98c616816dfca7adfa4dc5d5f152d9e5000000000000000000000000000000000000000000000000000000000000000100000…	16112651	0xbbd5a308c9781f0b9e4c3f4810aeb99d4576cd5bba3fb7716b2f780cc5f2b18e
67062	0xcea59cc9d3f58237e34e0f033ebf461c8292ac9764e83870cb4c54629aeea707	0x0165785451d594155677a91c9dc63dfd3c6c8409	0xf89d7b9c864f589bbf53a82105107622b35eaa40	7.97e+16	0x	16112651	0xbbd5a308c9781f0b9e4c3f4810aeb99d4576cd5bba3fb7716b2f780cc5f2b18e
67064	0xe99c8926d1c108d046b6761a32a52d266fa305a5ac646e1f2a398ef6e271480c	0x28c6c06298d514db089934071355e5743bf21d60	0x5faa989af96af85384b8a938c2ede4a7378d9875	0	0xa9059cbb000000000000000000000000f7a308445f6280801715028ce80305d9b7be412300000000000000000000000000000000000000000000000cfabf4fee6d209000	16112651	0xbbd5a308c9781f0b9e4c3f4810aeb99d4576cd5bba3fb7716b2f780cc5f2b18e
67065	0x331cf35eaa77d8afdb3c59faf8e2e2e8c079e371f0fbf41fbb0d9a8e9f436fa2	0x4e5b2e1dc63f6b91cb6cd759936495434c7e972f	0xf17187c88c1dff10aceb3829c7fe325e297e6bea	2.97e+17	0x	16112651	0xbbd5a308c9781f0b9e4c3f4810aeb99d4576cd5bba3fb7716b2f780cc5f2b18e
67068	0x7c4123f2ee8c50ed37e88199679410d60ee62e7c7acba7accc0f19b6e5063b56	0x710bda329b2a6224e4b44833de30f38e7f81d564	0xb8901acb165ed027e32754e0ffe830802919727f	0	0x23c452cd000000000000000000000000ad451d0f19899ef59de39e6d3b068b8055110de800000000000000000000000000000000000000000000000000154fe11aa654de7ae7713c0956afde6c0a72f3811919358ec6d016ef208a9e81140b3a44aba0bc00000000000000000000000000000000000000000000000000065b5d720decd6	16112651	0xbbd5a308c9781f0b9e4c3f4810aeb99d4576cd5bba3fb7716b2f780cc5f2b18e
67069	0xb38f323fb6b1758c2e73aa76de0dfc33032bbf056659d535bfd919a6ea524679	0x38879dac9d8d3a1bdbe3c8bf599f7ec16d207538	0x38879dac9d8d3a1bdbe3c8bf599f7ec16d207538	0	0x	16112651	0xbbd5a308c9781f0b9e4c3f4810aeb99d4576cd5bba3fb7716b2f780cc5f2b18e
67071	0xb0cd6944e85974f533c812340c839c5344fb1b77de8d005c1179f362e428b7d3	0x690b9a9e9aa1c9db991c7721a92d351db4fac990	0x388c818ca8b9251b393131c08a736a67ccb19297	8.16e+16	0x	16112651	0xbbd5a308c9781f0b9e4c3f4810aeb99d4576cd5bba3fb7716b2f780cc5f2b18e
67073	0xd81f4ef9f2801691540829c700b2be05dbd3450f01324e6b3a28308a5c1f28e8	0x7830c87c02e56aff27fa8ab1241711331fa86f43	0xa9d1e08c7793af67e9d92fe308d5697fb81d3e43	0	0xca350aa60000000000000000000000000000000000000000000000000000000000000040000000000000000000000000000000000000000000000000000000000003d0900000000000000000000000000000000000000000000000000000000000000009000000000000000000000000a0b86991c6218b36c1d19d4a2e9eb0ce3606eb48000000000000000000000000e61b02499df1d76c7ad05215c16e34fd1e7aa142000000000000000000000000000000000000000000000000000000000082247400000…	16112651	0xbbd5a308c9781f0b9e4c3f4810aeb99d4576cd5bba3fb7716b2f780cc5f2b18e
67074	0x1a88e0059a1fa6367db0f94bf94b2d0db7ae50da4a9ebbf741eba7318240e580	0x57d4e9b4a191d2bba64abd6c9250a500e29eea74	0x4df0843fbf3235eb1b874a41f4a405b76bf98802	6e+17	0x	16112651	0xbbd5a308c9781f0b9e4c3f4810aeb99d4576cd5bba3fb7716b2f780cc5f2b18e
67075	0x51a8f40acc48dfb9f6a377c2d44b692f1450622542dce3755850c7c3139c62ff	0x7ef9ac71a15c9275f20786ce746e81ba18921ef2	0xdac17f958d2ee523a2206206994597c13d831ec7	0	0xa9059cbb0000000000000000000000008d09631124d03bd87a53bb2658a491f594b1ea7d0000000000000000000000000000000000000000000000000000000000000000	16112651	0xbbd5a308c9781f0b9e4c3f4810aeb99d4576cd5bba3fb7716b2f780cc5f2b18e
67076	0x6af67b4446844c8e8c199c81414dab29786b5e077fe1cc475fc5e3cb87f23b77	0xb3ca2d678d16e587ff3e1508fc5a7357cd81238e	0x881d40237659c251811cec9c364ef91dc08d300c	0	0x5f5755290000000000000000000000000000000000000000000000000000000000000080000000000000000000000000a0b86991c6218b36c1d19d4a2e9eb0ce3606eb4800000000000000000000000000000000000000000000000000000000066914aa00000000000000000000000000000000000000000000000000000000000000c00000000000000000000000000000000000000000000000000000000000000017616972737761704c696768743346656544796e616d696300000000000000000000000…	16112651	0xbbd5a308c9781f0b9e4c3f4810aeb99d4576cd5bba3fb7716b2f780cc5f2b18e
67077	0xec7756a2b4849f0f3a3f84c8ef67fa9a1b8b584e07d2b91a22e3d4c51ec162f3	0x2ed539e35419d017e6448c932ed8268964883287	0x7a250d5630b4cf539739df2c5dacb4c659f2488d	0	0x791ac9470000000000000000000000000000000000000000000000004551111b9b6d2000000000000000000000000000000000000000000000000000000000000000000000000000000000000000000000000000000000000000000000000000000000a00000000000000000000000002ed539e35419d017e6448c932ed826896488328700000000000000000000000000000000000000000000000000000000638ccbbb000000000000000000000000000000000000000000000000000000000000000200000…	16112651	0xbbd5a308c9781f0b9e4c3f4810aeb99d4576cd5bba3fb7716b2f780cc5f2b18e
67078	0x0574b762122ebaaf9dfdbe36e626a7e6d6c69a4929de475c6fcabee0e95ec005	0xa299c04eb002e667bcb6c0d38a024eb5022a5e1a	0xaecaa636777f42b878e5e169515571e8dd2a5191	575000000000000	0x	16112651	0xbbd5a308c9781f0b9e4c3f4810aeb99d4576cd5bba3fb7716b2f780cc5f2b18e
67079	0x31545f3066edb4164f52eba23afa80e9d5aad5d28da2aa34f43163a6b623896c	0xcc0c22979087ccb4b9b5852b5a92065b8706d61a	0x881d40237659c251811cec9c364ef91dc08d300c	0	0x5f57552900000000000000000000000000000000000000000000000000000000000000800000000000000000000000006b175474e89094c44da98b954eedeac495271d0f00000000000000000000000000000000000000000000000494b42aaca9b504c200000000000000000000000000000000000000000000000000000000000000c00000000000000000000000000000000000000000000000000000000000000017616972737761704c696768743346656544796e616d696300000000000000000000000…	16112651	0xbbd5a308c9781f0b9e4c3f4810aeb99d4576cd5bba3fb7716b2f780cc5f2b18e
67081	0xd2dd35b83d2fcb9cc807c8211a32b28e992a6e950afabcdb0d1d827454e7379f	0x5f6b3938cc56f06de1148bc63439f4749e2e378d	0x5eb294507e5f038b8b34433ed37b4c18dd3a3074	1.59e+16	0x	16112651	0xbbd5a308c9781f0b9e4c3f4810aeb99d4576cd5bba3fb7716b2f780cc5f2b18e
67083	0xaa4362ecdc8a096232b16e0e959b992eba1a56540282dd0af9b206ce6d206a3e	0x76862771371100ed483fd2b39366b41d0ee4a207	0x823556202e86763853b40e9cde725f412e294689	0	0x095ea7b3000000000000000000000000881d40237659c251811cec9c364ef91dc08d300cffffffffffffffffffffffffffffffffffffffffffffffffffffffffffffffff	16112651	0xbbd5a308c9781f0b9e4c3f4810aeb99d4576cd5bba3fb7716b2f780cc5f2b18e
67085	0x0a77f926a2b94e8645e680d49e9d801d11c1cff8ed9243f6d964bd1ae26f5eb6	0x705d2488020b87cac572c58999832b771c8f6e80	0x4c93d01b645cc9a26d899384f8e77ec952c22c30	0	0x095ea7b300000000000000000000000068b3465833fb72a70ecdf485e0e4c7bd8665fc45ffffffffffffffffffffffffffffffffffffffffffffffffffffffffffffffff	16112651	0xbbd5a308c9781f0b9e4c3f4810aeb99d4576cd5bba3fb7716b2f780cc5f2b18e
67086	0xdab4b78aaeac079ef7a097d3e6d96746b208c69f25b22833af40408e0e93e057	0xfa0e4f48a369bb3ecbcee0b5119379ea8d1bcf29	0x785433d8b06d77d68df6be63944742130a4530d1	0	0xc980753900000000000000000000000000000000000000000000000000000000000000800000000000000000000000000000000000000000000000000000000000000320000000000000000000000000000000000000000000000000000000000000040000000000010000000000000000000000000000000000000000000000000000000000000000000000000000000000000000000000000000000000000000000280000000000000000000000043d6990286561e7f599d19ef68dfe4b90004d5fd040d060…	16112651	0xbbd5a308c9781f0b9e4c3f4810aeb99d4576cd5bba3fb7716b2f780cc5f2b18e
67087	0x511d983f391a12ad0463ae26b183b4426264cf30b05ffb3728fb52d1076a90c8	0x79672062c5a45e3808d6b784129cf3ecf59d4224	0xdac17f958d2ee523a2206206994597c13d831ec7	0	0xa9059cbb000000000000000000000000d15f7acebefad7bdedb83245763ea964170c30cc000000000000000000000000000000000000000000000000000000000303f130	16112651	0xbbd5a308c9781f0b9e4c3f4810aeb99d4576cd5bba3fb7716b2f780cc5f2b18e
67088	0xe58d728975b920145d9b04d197ffdeccaf789d81f0b94d3d72d510263946acee	0xd515367271a5f3e077a6b96cb81d86d3a002f6ff	0x68b3465833fb72a70ecdf485e0e4c7bd8665fc45	0	0x5ae401dc00000000000000000000000000000000000000000000000000000000638cd24b000000000000000000000000000000000000000000000000000000000000004000000000000000000000000000000000000000000000000000000000000000020000000000000000000000000000000000000000000000000000000000000040000000000000000000000000000000000000000000000000000000000000016000000000000000000000000000000000000000000000000000000000000000e4472b4…	16112651	0xbbd5a308c9781f0b9e4c3f4810aeb99d4576cd5bba3fb7716b2f780cc5f2b18e
67089	0x54b4ba67e66e1deef139170189d4178cb5251e7d7e8ace52f0574a4dc75c5f9c	0x2a45907f94df93388801ae72fe810eac75926a1d	0x3467b742b4b6a9dc3a705137e298a11829be080a	2.1e+16	0x	16112651	0xbbd5a308c9781f0b9e4c3f4810aeb99d4576cd5bba3fb7716b2f780cc5f2b18e
67091	0x062a0baa4fbf50909db8134fd64c83264c0a40e710e6fe16127e418474fe4dd0	0x0906e75be92d865d74a42b7b24f73ff5fff93ed6	0x295b42684f90c77da7ea46336001010f2791ec8c	0	0xa9059cbb0000000000000000000000003c7bd72312e64f64a1fe58bb198f222ff073dab600000000000000000000000000000000000000000000037f933138a78f3ee09e	16112651	0xbbd5a308c9781f0b9e4c3f4810aeb99d4576cd5bba3fb7716b2f780cc5f2b18e
67092	0x32cb55a4123ced080c2e58761313c00adc5fb459f8032fbd292bb6a6900c561e	0x4a65d4f0d4c3270621c2f9863506bd746306d32b	0x68b3465833fb72a70ecdf485e0e4c7bd8665fc45	0	0x5ae401dc00000000000000000000000000000000000000000000000000000000638cd24b000000000000000000000000000000000000000000000000000000000000004000000000000000000000000000000000000000000000000000000000000000030000000000000000000000000000000000000000000000000000000000000060000000000000000000000000000000000000000000000000000000000000016000000000000000000000000000000000000000000000000000000000000002c000000…	16112651	0xbbd5a308c9781f0b9e4c3f4810aeb99d4576cd5bba3fb7716b2f780cc5f2b18e
67093	0x940200a2dd2a7a4a635b13a50503f0d20ac69dbff39e9d7982a01f934721757d	0x09564716e12eb2ca51f64d07d76aa88b7cdc0283	0xeeeec6476073778077b40a73fe32e23a9876cab4	7.91e+16	0x2b66d72e000000000000000000000000000000000000000000000000000000000000002000000000000000000000000000000000000000000000000000000000000000ee65794a68624763694f694a46557a49314e694973496d74705a434936496a64684e6a526c5a6d51314c544a694e4463744e475a6a5a6931684f4463784c5445785a6d59354f5451345954646a4f434a392e436763784d6a597a4c6a513345674e56553051614a445a6c4e574e6c4d4463324c5455775a6a63744e446778595330354d3…	16112651	0xbbd5a308c9781f0b9e4c3f4810aeb99d4576cd5bba3fb7716b2f780cc5f2b18e
67095	0x8c640adaf03b4cd79337666202bcefd5681c5853c44c6a483adf64440d9b17eb	0xddfabcdc4d8ffc6d5beaf154f18b778f892a0740	0x3aac5f00ac93f557038bc502b8e51b46b59e7233	8720000000000000	0x	16112651	0xbbd5a308c9781f0b9e4c3f4810aeb99d4576cd5bba3fb7716b2f780cc5f2b18e
67096	0xc411a26bfae07ee3410ac54cf53dbad14a121e3926ab011bb2825ef668aaf835	0x3cd751e6b0078be393132286c442345e5dc49699	0x84cc1dbc97f6ac8e59bbb939d7169595a0fe12b0	8720000000000000	0x	16112651	0xbbd5a308c9781f0b9e4c3f4810aeb99d4576cd5bba3fb7716b2f780cc5f2b18e
67099	0xbe308ca01e7f818eac3a962cd0cbba46e3f4bdb21cf384635228874b5f083829	0xb739d0895772dbb71a89a3754a160269068f0d45	0xa0274953ec059976a1894bf2fa46feb05966f1f3	8720000000000000	0x	16112651	0xbbd5a308c9781f0b9e4c3f4810aeb99d4576cd5bba3fb7716b2f780cc5f2b18e
67100	0x56784bd83aad47f3c1e376dfe44012c5294455e9f60e72b4c766158ede6722b2	0xafb60c2fb2d7cfef50fe4604b742b588b6d37966		0	0x60806040523480156200001157600080fd5b50733cc6cdda760b79bafa08df41ecfa224f810dceb660016daaeb6d7670e522a718067333cd4e3b156200016e578015620000bc57604051633e9f1edf60e11b81523060048201526001600160a01b03831660248201526daaeb6d7670e522a718067333cd4e90637d3e3dbe906044015b600060405180830381600087803b1580156200009d57600080fd5b505af1158015620000b2573d6000803e3d6000fd5b505050506200016e565b6001600160a01b03821…	16112651	0xbbd5a308c9781f0b9e4c3f4810aeb99d4576cd5bba3fb7716b2f780cc5f2b18e
67104	0xa55e9c83636c70e0f6e2cecf04b454dbee7f7b4fdaa73a108680cacb7d63de77	0x9f5adcb65cf3d98c0a15c58bf05cf571f7822f6c	0x68b3465833fb72a70ecdf485e0e4c7bd8665fc45	2960000000000000	0x5ae401dc00000000000000000000000000000000000000000000000000000000638cd22700000000000000000000000000000000000000000000000000000000000000400000000000000000000000000000000000000000000000000000000000000001000000000000000000000000000000000000000000000000000000000000002000000000000000000000000000000000000000000000000000000000000000e4472b43f3000000000000000000000000000000000000000000000000000a842658c47…	16112651	0xbbd5a308c9781f0b9e4c3f4810aeb99d4576cd5bba3fb7716b2f780cc5f2b18e
67107	0x2f0deae24adb6bda66db34d08baacde7024148e435c66b88020d480368f3091b	0x3985c1b768c51b1922a91a28cd4d22d02845aeb5	0xdac17f958d2ee523a2206206994597c13d831ec7	0	0xa9059cbb000000000000000000000000854e3124253d6258db13dec7a134172cb4fa33590000000000000000000000000000000000000000000000000000000000e4e1c0	16112651	0xbbd5a308c9781f0b9e4c3f4810aeb99d4576cd5bba3fb7716b2f780cc5f2b18e
67108	0xac180e268b59f78bf8b797f100c2e7555daed0b72b6dd702678268100890a8a4	0x839d4641f97153b0ff26ab837860c479e2bd0242	0x1111111254eeb25477b68fb85ed929f73a960582	0	0x0502b1c5000000000000000000000000d417144312dbf50465b1c641d016962017ef62400000000000000000000000000000000000000000000001afea1e06871726580e00000000000000000000000000000000000000000000000000000000350e2aaa0000000000000000000000000000000000000000000000000000000000000080000000000000000000000000000000000000000000000000000000000000000180000000000000003b6d034017890deb188f2de6c3e966e053da1c9a111ed4a5e26b9…	16112651	0xbbd5a308c9781f0b9e4c3f4810aeb99d4576cd5bba3fb7716b2f780cc5f2b18e
67111	0xa1cd59efdfd2aefef0db5f962f4f84ba4fe94d54dc4c0dfd7634b736e1387e07	0x5009cd79c0a2f930dff5841ab0843e6addf93db3	0xf89d7b9c864f589bbf53a82105107622b35eaa40	6.17e+16	0x	16112651	0xbbd5a308c9781f0b9e4c3f4810aeb99d4576cd5bba3fb7716b2f780cc5f2b18e
67113	0xe2d144a354fe2f59aa14735c20374229424023baf52cfdd99ddbe4bbca4f6d79	0x7a3cdc2e82c354e1a3bc51626726f20de661620b	0xc5a0a17eabbb0e64dcd567b5670c8c5d5c34128c	0	0x0dcd7a6c0000000000000000000000003a428678c9fdfae046e5de14337624fa4ce2ffc1000000000000000000000000000000000000000000000000000000008ae49bc30000000000000000000000008fc8f8269ebca376d046ce292dc7eac40c8d358a00000000000000000000000000000000000000000000000000000000639605bb000000000000000000000000000000000000000000000000000000000000ee0800000000000000000000000000000000000000000000000000000000000000c000000…	16112651	0xbbd5a308c9781f0b9e4c3f4810aeb99d4576cd5bba3fb7716b2f780cc5f2b18e
67114	0xd41da3c4db5dd41fbdeebaa62975babd858d204ff3caefab66ad8de1ba542c72	0xd2c5b711e50c592a46f96c6e76e714178fd9ad89	0x9507c04b10486547584c37bcbd931b2a4fee9a41	16112651	0x3300000000000000000ba5c4ada300000000000000001182fc0302010bb8ff000099ac8ca7087fa4a2a1fb6357269965a2014abc352260fac5e5542a773aa44fbcfedf7c193bc2c599a0b86991c6218b36c1d19d4a2e9eb0ce3606eb4803	16112651	0xbbd5a308c9781f0b9e4c3f4810aeb99d4576cd5bba3fb7716b2f780cc5f2b18e
67116	0x2451dd59e21996f8a2107638fa9ad50a3c75df3339216121faacf0c511554b56	0x7c195d981abfdc3ddecd2ca0fed0958430488e34	0x837f6381fd04866c9635328e62edf777e7fb765d	8720000000000000	0x	16112651	0xbbd5a308c9781f0b9e4c3f4810aeb99d4576cd5bba3fb7716b2f780cc5f2b18e
67117	0x6e177e7f56d58f13b58e512361e3649b6360ff4e8eda6b97340e6ae16555e3bf	0xc6eb739e8cac9e4db4fa67d8bfe251b43288257f	0xdac17f958d2ee523a2206206994597c13d831ec7	0	0x095ea7b3000000000000000000000000881d40237659c251811cec9c364ef91dc08d300cffffffffffffffffffffffffffffffffffffffffffffffffffffffffffffffff	16112651	0xbbd5a308c9781f0b9e4c3f4810aeb99d4576cd5bba3fb7716b2f780cc5f2b18e
67119	0xb6dea4664805393f6814ed7cf4ead6e29a9cbc4bf0c190abc279809f37f1b7e5	0xc6eb739e8cac9e4db4fa67d8bfe251b43288257f	0x881d40237659c251811cec9c364ef91dc08d300c	0	0x5f5755290000000000000000000000000000000000000000000000000000000000000080000000000000000000000000dac17f958d2ee523a2206206994597c13d831ec7000000000000000000000000000000000000000000000000000000002308a00000000000000000000000000000000000000000000000000000000000000000c0000000000000000000000000000000000000000000000000000000000000000c307846656544796e616d6963000000000000000000000000000000000000000000000…	16112651	0xbbd5a308c9781f0b9e4c3f4810aeb99d4576cd5bba3fb7716b2f780cc5f2b18e
67124	0xad4ddf8d8d11a8e2fe9ee9a466263e5b61bfa623bc4109b4f9796ec89c60df64	0xf38e80657164ee04b3593cb3367cd4ce9e8914f3	0x1111111254eeb25477b68fb85ed929f73a960582	0	0xe449022e0000000000000000000000000000000000000000000000000000000059682f0000000000000000000000000000000000000000000000000010627f7155a8a9c40000000000000000000000000000000000000000000000000000000000000060000000000000000000000000000000000000000000000000000000000000000100000000000000000000000088e6a0c2ddd26feeb64f039a2c41296fcb3f5640e26b9977	16112651	0xbbd5a308c9781f0b9e4c3f4810aeb99d4576cd5bba3fb7716b2f780cc5f2b18e
67125	0xc0578ec96745ec3a5dd0928a79356f0c314c47b9df36b402eabe0c7696838027	0x21a31ee1afc51d94c2efccaa2092ad1028285549	0xdac17f958d2ee523a2206206994597c13d831ec7	0	0xa9059cbb000000000000000000000000a2afbedf7e5c8bf94ee7a4f7912359104c1868810000000000000000000000000000000000000000000000000000000005ae29a0	16112651	0xbbd5a308c9781f0b9e4c3f4810aeb99d4576cd5bba3fb7716b2f780cc5f2b18e
67126	0x81d12182cbeeaeaf7fdb8ceb646025a090370a7072bf106088c619847c8e52ac	0xaf456696c3805cbe8a703813c9a6938cb93ff7d4	0x02834fe5da272c2f4a1009d64b5a43390daa2c43	0	0x	16112651	0xbbd5a308c9781f0b9e4c3f4810aeb99d4576cd5bba3fb7716b2f780cc5f2b18e
67129	0x0674ee8f1093678a168ce70eb5d11b5585211dc7ca0c774e85f174b6e68da16b	0x95a9bd206ae52c4ba8eecfc93d18eacdd41c88cc	0x062e9ad4c2c088f40f39a71179804f2cb06e30ef	8720000000000000	0x	16112651	0xbbd5a308c9781f0b9e4c3f4810aeb99d4576cd5bba3fb7716b2f780cc5f2b18e
67130	0x6f28c8ba37c52dcb41fcfb50c31c00db539096b28080ba88915e8263226afe1d	0x6ece61d29b90642941c41240da924690da145696	0x5a54fe5234e811466d5366846283323c954310b2	0	0x46f83b50000000000000000000000000000000000000000000000000000000000000006eeffa03c24314cddd34c2ea70b9416ea40daa08c42d38dff0132ce2c5d1e3d2a600000000000000000000000000000000000000000000000000000000000000144b256f8d999ba70101e3ef67bfa9f2118afab6cf7da409aab4c475c8efe705f9	16112651	0xbbd5a308c9781f0b9e4c3f4810aeb99d4576cd5bba3fb7716b2f780cc5f2b18e
67131	0x7d7b6a453f2dddcddc8d19232a7388283494bce460eff78ec75e825a7f486a44	0xa9831d89c4067bf7518efbcb6351ef6dd0059f33	0xa0b86991c6218b36c1d19d4a2e9eb0ce3606eb48	0	0x23b872dd000000000000000000000000c01c371e62415b0debe39d9154fb1c1083e574aa000000000000000000000000474cee9ad29f4da7ae351ca3402c9d3656b465a10000000000000000000000000000000000000000000000000000000000000000	16112651	0xbbd5a308c9781f0b9e4c3f4810aeb99d4576cd5bba3fb7716b2f780cc5f2b18e
67132	0x4b8a04fe8fc1a3ab595ae7412782fde5c23855a36f3be4e7ad8cc3346f8ae3ee	0xb739d0895772dbb71a89a3754a160269068f0d45	0x62747831c3469951624055e3951a31ec0d60503c	8720000000000000	0x	16112651	0xbbd5a308c9781f0b9e4c3f4810aeb99d4576cd5bba3fb7716b2f780cc5f2b18e
67133	0x5b5ed46a5b34d7596a744e48e3bddea6800c2708fc88443bde26002aecad5638	0xa6213c1c97703abf90c78de30508713b16abdeaa	0xf89d7b9c864f589bbf53a82105107622b35eaa40	7.97e+16	0x	16112651	0xbbd5a308c9781f0b9e4c3f4810aeb99d4576cd5bba3fb7716b2f780cc5f2b18e
67134	0x7150963f830417c7e7efe0370dde5e2be8d6a612f478f50985ba31d1318fd661	0xe953863a6f5317b8d226ab07cbae97f6b63a0373	0x000000000000ad05ccc4f10045630fb830b95127	2.5e+16	0x9a1fc3a70000000000000000000000000000000000000000000000000000000000000040000000000000000000000000000000000000000000000000000000000000038000000000000000000000000000000000000000000000000000000000000000e0000000000000000000000000000000000000000000000000000000000000001be8eec2a70a00a8eadbbc419ae3b7f0a7de4b432fe6b032f026bd19ed5d18cbff1ebd67372ba0b9c75d127c462f94f83756a097779c73ee25e10230f08a3dea1400000…	16112651	0xbbd5a308c9781f0b9e4c3f4810aeb99d4576cd5bba3fb7716b2f780cc5f2b18e
67135	0x75d62c704443395ae1dc0f4bdc8d14cd227f386eb372c45d0ca7f7fbfe3cddc9	0x7c195d981abfdc3ddecd2ca0fed0958430488e34	0x1011743d878f02b5a17b43727652f64607b01bae	8720000000000000	0x	16112651	0xbbd5a308c9781f0b9e4c3f4810aeb99d4576cd5bba3fb7716b2f780cc5f2b18e
67137	0xab0f32b12c20a81babcbd7713c287f9229aa2902670a7182dcc59386bafe9d1c	0x183c5a0177a4fccabdc942b4fde184a360b7f49a	0xe53ee875023af7833950049bf5e6a6ba55dc4067	1.85e+16	0x	16112651	0xbbd5a308c9781f0b9e4c3f4810aeb99d4576cd5bba3fb7716b2f780cc5f2b18e
67138	0x4dd0bb6e59b8ad0d002a7dead9d8797620541dc0510da221bfebb4298a772490	0x9c73dc905e59563a48523a157bb8ef5c676db9e6	0x176b8a48c15b9b16b1deb9022a71dd1261c6ceac	845000000000000	0x	16112651	0xbbd5a308c9781f0b9e4c3f4810aeb99d4576cd5bba3fb7716b2f780cc5f2b18e
67139	0xef47dc50a1d97fa0dce64101884bacdecda0eeea2bb14b7de564eb6d8222a9fb	0xc36c85d2298366e1822017cbc9c9893b9e520274	0x881d40237659c251811cec9c364ef91dc08d300c	0	0x5f5755290000000000000000000000000000000000000000000000000000000000000080000000000000000000000000c02aaa39b223fe8d0a0e5c4f27ead9083c756cc20000000000000000000000000000000000000000000000000091a94863ca800000000000000000000000000000000000000000000000000000000000000000c000000000000000000000000000000000000000000000000000000000000000136f6e65496e6368563446656544796e616d69630000000000000000000000000000000…	16112651	0xbbd5a308c9781f0b9e4c3f4810aeb99d4576cd5bba3fb7716b2f780cc5f2b18e
67140	0x0b00c5225994f9a4d2cc7e20f5d7ed85331fcdc272c9eec1f6925e0323f2eb52	0x9723b6d608d4841eb4ab131687a5d4764eb30138	0xdac17f958d2ee523a2206206994597c13d831ec7	0	0xa9059cbb0000000000000000000000005860016102855e062e8e9b1ac409b2b6cccd8bdf00000000000000000000000000000000000000000000000000000000007270e0	16112651	0xbbd5a308c9781f0b9e4c3f4810aeb99d4576cd5bba3fb7716b2f780cc5f2b18e
67141	0x48d9ec06a5e7625e924343ae32abf247313ea84af2b9b5322ed0b2b0679a4fe1	0xbb0bb1b234074a936f4075599812444317e0e555	0xc02aaa39b223fe8d0a0e5c4f27ead9083c756cc2	0	0x2e1a7d4d0000000000000000000000000000000000000000000000000f91e0d7e1a15000	16112651	0xbbd5a308c9781f0b9e4c3f4810aeb99d4576cd5bba3fb7716b2f780cc5f2b18e
67143	0xabc6e6fec53639aa095a6f9b6c674fd66202a0f163007c7a5d1db52291cd1faa	0x7c195d981abfdc3ddecd2ca0fed0958430488e34	0xe797d045a6eae4c4c18ff895ed711a02c82b0bb6	8720000000000000	0x	16112651	0xbbd5a308c9781f0b9e4c3f4810aeb99d4576cd5bba3fb7716b2f780cc5f2b18e
67144	0x3d40300bcc78cefefd60e71da4876cdcb268636e500f4b7889729acc34c4d5b7	0x3b794929566e3ba0f25e4263e1987828b5c87161	0x2adf75a1a2e10505a2f3472c137aa7a24cab86ba	1.23e+16	0x	16112651	0xbbd5a308c9781f0b9e4c3f4810aeb99d4576cd5bba3fb7716b2f780cc5f2b18e
67145	0xaea7ef560900dac9d3a0ca2dc269685801ddfc74f7e20106702721c21e60f7b9	0x18916e1a2933cb349145a280473a5de8eb6630cb	0x2bfb4dfdefcc4a72f03b0a3464eb2eafa2633583	278000000000000	0x	16112651	0xbbd5a308c9781f0b9e4c3f4810aeb99d4576cd5bba3fb7716b2f780cc5f2b18e
67146	0x6a42f9bdd65d02f3106170415fbfc4b3e707fd2de9209f4632014378daece212	0xddfabcdc4d8ffc6d5beaf154f18b778f892a0740	0xff90d0ea68d961f5fb71600f50d5f7412ee7f4cf	8720000000000000	0x	16112651	0xbbd5a308c9781f0b9e4c3f4810aeb99d4576cd5bba3fb7716b2f780cc5f2b18e
67147	0x417833e4c9920678ddce49cd64058316666b4574714cee88bc2564f0665e64b0	0xb5d85cbf7cb3ee0d56b3bb207d5fc4b82f43f511	0x788cb8caed77043bf63ef5fbbc06dd9580a7d7d1	8720000000000000	0x	16112651	0xbbd5a308c9781f0b9e4c3f4810aeb99d4576cd5bba3fb7716b2f780cc5f2b18e
67151	0x06db449019dd5deb8409ac6210489e01c0438b65eecd6bf8e3f030fa3c07ab27	0xccbdbbfd0f686ece6239fcbefc41b5ce4fe53baf	0x76f4eed9fe41262669d0250b2a97db79712ad855	0	0xf17a454600000000000000000000000000000000000000000000000000000000000000c000000000000000000000000000000000000000000000000000000000000001a0000000000000000000000000000000000000000000000000c249fdd32777f060000000000000000000000000000000000000000000000000c1b4c70c1ee6f06c0000000000000000000000001d64fb0ffa8362b2e1ee7ee03929159551eab26e000000000000000000000000000000000000000000000000000000000000022000000…	16112651	0xbbd5a308c9781f0b9e4c3f4810aeb99d4576cd5bba3fb7716b2f780cc5f2b18e
67152	0xd3e784e361150501962b0ebb902df6a618164ee0582bab762029edb7a581b7f4	0x4aa9c2562f57e459e7c707a7e76147e30dd58607	0x68b3465833fb72a70ecdf485e0e4c7bd8665fc45	0	0x5ae401dc00000000000000000000000000000000000000000000000000000000638cd233000000000000000000000000000000000000000000000000000000000000004000000000000000000000000000000000000000000000000000000000000000020000000000000000000000000000000000000000000000000000000000000040000000000000000000000000000000000000000000000000000000000000016000000000000000000000000000000000000000000000000000000000000000e4472b4…	16112651	0xbbd5a308c9781f0b9e4c3f4810aeb99d4576cd5bba3fb7716b2f780cc5f2b18e
67153	0x5020154838b7bb9b5eec1fedbd71675489298a279975c88d784e1d34fde7b8c2	0xddfabcdc4d8ffc6d5beaf154f18b778f892a0740	0x2794815920fe294f72df59f0aeabc81767473211	8720000000000000	0x	16112651	0xbbd5a308c9781f0b9e4c3f4810aeb99d4576cd5bba3fb7716b2f780cc5f2b18e
67154	0xa7a8da72d7ff4e353d1169cd0db90ebd63ade984d0108e829d589ebdf04612fb	0xd32a30cfe87c0130225175ffef53cd04767c6eff	0x7d00a2bc1370b9005eb100004da500924600a2e1	0	0x00000000034b0b0005d500015c000000000000000000e95c4a3488e6a0c2ddd26feeb64f039a2c41296fcb3f564005d501003600000000002af59087f36e42b98db1b906d47dfc1d84a87fc49bd0522e285b98b905d500001000000000ca09d8983823fce31f735a26a57a0a0069dfabd41595a970faf5e1ee8b039d03000000000000000000e91bf12c	16112651	0xbbd5a308c9781f0b9e4c3f4810aeb99d4576cd5bba3fb7716b2f780cc5f2b18e
67156	0x0b5776961e0e5fb482b75606f539a36b7f14361acb31c1fed91ddbbd82464620	0xddfabcdc4d8ffc6d5beaf154f18b778f892a0740	0xf84d15fd731837badbcf9615b6e6a65dfc461bfb	8720000000000000	0x	16112651	0xbbd5a308c9781f0b9e4c3f4810aeb99d4576cd5bba3fb7716b2f780cc5f2b18e
67158	0xc1b970de89798299470ef78e27eef4876ca340db26a46f871e0b1ffbae9bbf48	0x59d60f3cd55d35b7e7586b5e84a984d19dc72952	0x77f5fd183f7673db2293792657a75c62301d5272	7950000000000000	0x	16112651	0xbbd5a308c9781f0b9e4c3f4810aeb99d4576cd5bba3fb7716b2f780cc5f2b18e
67159	0x10b889e435f264c25a38faea320ac4e30e2800a6418252a83a8b1f2978ec9a6d	0x71660c4005ba85c37ccec55d0c4493e66fe775d3	0x74837867ee2d8e22944b3c28140d5313e93e15e1	8720000000000000	0x	16112651	0xbbd5a308c9781f0b9e4c3f4810aeb99d4576cd5bba3fb7716b2f780cc5f2b18e
67161	0x93ae7fc05f32d11911b3a6da86b8f5e86e37f2a9d542e8721f004854e8cde24f	0xddfabcdc4d8ffc6d5beaf154f18b778f892a0740	0xb757683f9024e25659347bffdddf7e7c9f3995bd	8720000000000000	0x	16112651	0xbbd5a308c9781f0b9e4c3f4810aeb99d4576cd5bba3fb7716b2f780cc5f2b18e
67162	0x8b704a3e567427ab23ea863d5e9e0676c0ccce4bd3ff07cceb8caf00f9397f0f	0xddfabcdc4d8ffc6d5beaf154f18b778f892a0740	0x5ddd7c8c3c78964918f2f8863d3ed9fc125aafb5	8720000000000000	0x	16112651	0xbbd5a308c9781f0b9e4c3f4810aeb99d4576cd5bba3fb7716b2f780cc5f2b18e
67163	0x74b067870ebd6673738e23ae516dfbe2a3b987ab64e54742660444254c83832a	0x9723b6d608d4841eb4ab131687a5d4764eb30138	0xdac17f958d2ee523a2206206994597c13d831ec7	0	0xa9059cbb0000000000000000000000008e6938fe53669d56641cc2e101387fa06ceded71000000000000000000000000000000000000000000000000000000000e28d88c	16112651	0xbbd5a308c9781f0b9e4c3f4810aeb99d4576cd5bba3fb7716b2f780cc5f2b18e
67166	0x4408f9bd604c1e6961fe76abca7bf2c71b088074b3db6771d4c9e884d4ba2eed	0x6643887784cb89cc9537dbb7ea20b00c45abeefb	0xf89d7b9c864f589bbf53a82105107622b35eaa40	7.97e+16	0x	16112651	0xbbd5a308c9781f0b9e4c3f4810aeb99d4576cd5bba3fb7716b2f780cc5f2b18e
67168	0xda82ef339d4c7b6ecb27879c52f2430a9ba7d3995564f68a43a08c1b1d30390e	0xddfabcdc4d8ffc6d5beaf154f18b778f892a0740	0xe29494184e91069ca00b299b7c842b8d1d5b702d	8720000000000000	0x	16112651	0xbbd5a308c9781f0b9e4c3f4810aeb99d4576cd5bba3fb7716b2f780cc5f2b18e
67169	0x3f5adde28af58ae1c40676120dd2d8cbfff075c1be9ca2a180b4e3ccb9f66adc	0x7c195d981abfdc3ddecd2ca0fed0958430488e34	0x88b838b2d5295b1bde8d06092d21ad0a4caf72f2	8720000000000000	0x	16112651	0xbbd5a308c9781f0b9e4c3f4810aeb99d4576cd5bba3fb7716b2f780cc5f2b18e
67171	0xf9755266dd5b4765a50cc4fcc30ceaa69ba2bb9af0a582a6674dde67c604c2bf	0xedcd6465f9d576fc1c374bed9d84e2bba569eded	0x5fdcca53617f4d2b9134b29090c87d01058e27e9	0	0xdd2414d4000000000000000000000000edcd6465f9d576fc1c374bed9d84e2bba569eded03bad3b8fbd51cd13d55f4a5337165680a483ae31206baf415052f9c7449e26c000000000000000000000000000000000000000000000000000000000000006000000000000000000000000000000000000000000000000000000000000000410c625117ca38777dac3964cc2622ea639731fc15676203dd9953394802b1ee81575e0bf137be4ef76ff1e30a6b1132cfd4eec24ab7de2ca261c74b62acb5e3551b000…	16112651	0xbbd5a308c9781f0b9e4c3f4810aeb99d4576cd5bba3fb7716b2f780cc5f2b18e
67173	0x2e1dba994acf621567506cf20566d64ccfadbff35a43d06a34dec205e92a69c8	0x3a0fbb2f36271ff92ed8a16ca0343a0f320cfcd5	0x7492e30d60d96c58ed0f0dc2fe536098c620c4c0	0	0xefef39a10000000000000000000000000000000000000000000000000000000000000001	16112651	0xbbd5a308c9781f0b9e4c3f4810aeb99d4576cd5bba3fb7716b2f780cc5f2b18e
67174	0x5eb5c74d2a9e8d1f71b1239eddc32709eb38511aca2ac2a3b4e22627bf170546	0x76862771371100ed483fd2b39366b41d0ee4a207	0x881d40237659c251811cec9c364ef91dc08d300c	0	0x5f5755290000000000000000000000000000000000000000000000000000000000000080000000000000000000000000823556202e86763853b40e9cde725f412e294689000000000000000000000000000000000000000000000084d0948357fb08000000000000000000000000000000000000000000000000000000000000000000c000000000000000000000000000000000000000000000000000000000000000136f6e65496e6368563446656544796e616d69630000000000000000000000000000000…	16112651	0xbbd5a308c9781f0b9e4c3f4810aeb99d4576cd5bba3fb7716b2f780cc5f2b18e
67176	0xea4fc71b6b039bfd725ef4769bf6aa6befdb1f4aa31b70f42335aa5a4cb9ad3f	0xa3abf2791665b65a9cd161a9f1791f3b668a953f	0x72aaae3b3d239ecb1d4b4660947821ca4531f842	3000000000000000	0x	16112651	0xbbd5a308c9781f0b9e4c3f4810aeb99d4576cd5bba3fb7716b2f780cc5f2b18e
67177	0x6e776910871a65d61cfaf3edb3076596a82ca12b71d71fdb4eefd0797fbc7161	0x1c2ddd05017d2a4bef1a69220b8aa0f9d1c09725	0xdac17f958d2ee523a2206206994597c13d831ec7	0	0xa9059cbb00000000000000000000000028c6c06298d514db089934071355e5743bf21d60000000000000000000000000000000000000000000000000000000019521d2ac	16112651	0xbbd5a308c9781f0b9e4c3f4810aeb99d4576cd5bba3fb7716b2f780cc5f2b18e
67179	0x1b8af35ab38d356f21b9f127f6a11bb66130107cac4f0766c4577020270a28a3	0x3cd751e6b0078be393132286c442345e5dc49699	0x14d20323f4eef3b4a7ef9a2be72bbb765c70152d	8720000000000000	0x	16112651	0xbbd5a308c9781f0b9e4c3f4810aeb99d4576cd5bba3fb7716b2f780cc5f2b18e
67180	0xdc67a59ee78d41a05a93223ccfacb0aa5342f4e2ed7651ad922ea260784c1347	0xffa7282b67f72edd50e37b68d3599aa3ff3a9fb8	0xc02aaa39b223fe8d0a0e5c4f27ead9083c756cc2	6e+18	0xd0e30db0	16112651	0xbbd5a308c9781f0b9e4c3f4810aeb99d4576cd5bba3fb7716b2f780cc5f2b18e
67181	0xaf01b180af9be56f86093829ac5887f0dee74b42d16d70cc1ed1dc5a44c8e7d6	0x503828976d22510aad0201ac7ec88293211d23da	0x8a2b58ec4b447d8704d032b7209dc5679f0d97f1	8720000000000000	0x	16112651	0xbbd5a308c9781f0b9e4c3f4810aeb99d4576cd5bba3fb7716b2f780cc5f2b18e
67182	0x54a27ca81a8fb24891aa028cc605bc0e7f69e969e094bb1a4d463813c42f95b5	0x71660c4005ba85c37ccec55d0c4493e66fe775d3	0xc8aea3d25a5da63ef643654f737d1192963f9752	8720000000000000	0x	16112651	0xbbd5a308c9781f0b9e4c3f4810aeb99d4576cd5bba3fb7716b2f780cc5f2b18e
67183	0xa73831232870d15b1a5e3d6449e054077e1d698ee0f27975036e79bd610ec75e	0x503828976d22510aad0201ac7ec88293211d23da	0xd15eca3f5b53c899f5b71aa2a9dff0cca150c12f	8720000000000000	0x	16112651	0xbbd5a308c9781f0b9e4c3f4810aeb99d4576cd5bba3fb7716b2f780cc5f2b18e
67184	0xc8d32c30cfda464b188e6744e1e32ec32df8f4847203dd4a9fbdfc4b53828183	0x09564716e12eb2ca51f64d07d76aa88b7cdc0283	0xeeeec6476073778077b40a73fe32e23a9876cab4	7.91e+16	0x2b66d72e000000000000000000000000000000000000000000000000000000000000002000000000000000000000000000000000000000000000000000000000000000ee65794a68624763694f694a46557a49314e694973496d74705a434936496a64684e6a526c5a6d51314c544a694e4463744e475a6a5a6931684f4463784c5445785a6d59354f5451345954646a4f434a392e436763784d6a597a4c6a513345674e56553051614a4746694e7a6c6b4d5467314c5455794d6a49744e446777595330344d6…	16112651	0xbbd5a308c9781f0b9e4c3f4810aeb99d4576cd5bba3fb7716b2f780cc5f2b18e
67185	0xa76ee9b11e62072e51fe946a0052015e064804ff1f7594ef95ce01c26bd9e1e7	0x95a9bd206ae52c4ba8eecfc93d18eacdd41c88cc	0xfb5d7b42d8e29509e978529abb066341ccf80bc4	8720000000000000	0x	16112651	0xbbd5a308c9781f0b9e4c3f4810aeb99d4576cd5bba3fb7716b2f780cc5f2b18e
67187	0x199552e93a4a5daa6a78542e340a36e376ec51cc43c41a9c73d59fdd184a53c8	0xb418b66bb058b68f1213cc3c9dfb5929eaa6a632	0xc4de35942e216b77a5f634b749ae48d6daca16a3	1.94e+16	0x	16112651	0xbbd5a308c9781f0b9e4c3f4810aeb99d4576cd5bba3fb7716b2f780cc5f2b18e
67189	0x496bef54d1f00f7d25a850f307013ff636e3f4a0e80db2cc5892c8aad56fe221	0xb739d0895772dbb71a89a3754a160269068f0d45	0xe962334cfba29996bd34be3618f870061ea8b58b	8720000000000000	0x	16112651	0xbbd5a308c9781f0b9e4c3f4810aeb99d4576cd5bba3fb7716b2f780cc5f2b18e
67190	0x2cb8c1a1c8635de8e4c2c6a7ddcc70e49f60a2edd6afde6b3e855a8eb5467b29	0xc5a93444cc4da6efb9e6fc6e5d3cb55a53b52396	0xc36dc312040a8635d2740eae7cb33ee1fcc31e41	3740000000000000	0x	16112651	0xbbd5a308c9781f0b9e4c3f4810aeb99d4576cd5bba3fb7716b2f780cc5f2b18e
67192	0x359e6ac37fece291817de5ac4031a628bc7c0ea37821b54489ac966d7a50d69f	0x7c195d981abfdc3ddecd2ca0fed0958430488e34	0xd3801526596d8d45c3d372059faddd8c11bb0732	8720000000000000	0x	16112651	0xbbd5a308c9781f0b9e4c3f4810aeb99d4576cd5bba3fb7716b2f780cc5f2b18e
67193	0x6128bdc4676005c4f46fb2302e8f068a31ea903a76e6551b136e0761391e3490	0xb739d0895772dbb71a89a3754a160269068f0d45	0x6e846079ba47b4d1776c9d6f5ebcca561c8782cf	1.19e+17	0x	16112651	0xbbd5a308c9781f0b9e4c3f4810aeb99d4576cd5bba3fb7716b2f780cc5f2b18e
67197	0xf63a24611ac11d6b144cbd1e97bedea7973f733b69aaabd0e9164553c1a40e77	0x6b17ade1d195677c4157813446744bd2da6f94a2	0x114342d324e9cc2b0c44fca7eb8ec9391fb67a9c	1.54e+16	0x	16112651	0xbbd5a308c9781f0b9e4c3f4810aeb99d4576cd5bba3fb7716b2f780cc5f2b18e
67199	0x99862ed1f2ee58755528f293e63da76f1bb8eca099afa9fef3d64a655ae920a1	0x0acdd0fefb605957dfcba4816d77c43dec3f1f79	0x5db19e5322841a87c062ef4a79c05f2f2a34b27d	3000000000000000	0x	16112651	0xbbd5a308c9781f0b9e4c3f4810aeb99d4576cd5bba3fb7716b2f780cc5f2b18e
67200	0x7e4abbad3990533214bfa818a8388b35d4d91b35e70f7fb056b17f1f4c6de9d1	0x2845633f9cd219b43be29cae1ad4b776865e51d0	0xeeeec6476073778077b40a73fe32e23a9876cab4	7.91e+16	0x2b66d72e000000000000000000000000000000000000000000000000000000000000002000000000000000000000000000000000000000000000000000000000000000ee65794a68624763694f694a46557a49314e694973496d74705a434936496a64684e6a526c5a6d51314c544a694e4463744e475a6a5a6931684f4463784c5445785a6d59354f5451345954646a4f434a392e436763784d6a597a4c6a513345674e56553051614a47566d4d4463774e5463344c5759774d4759744e4759314e5330354f5…	16112651	0xbbd5a308c9781f0b9e4c3f4810aeb99d4576cd5bba3fb7716b2f780cc5f2b18e
67202	0xfc38337fab9657ad07c354fb118e3446fa86aa7ef1cd8d22340b203b91258e77	0xa1dd14a6a03e91780ac75ef13a74d672653467c9	0x6de037ef9ad2725eb40118bb1702ebb27e4aeb24	0	0xa9059cbb0000000000000000000000000341e57d28805f40539f2db06f1ca61d605b9ee9000000000000000000000000000000000000000000000021ba7a87a4495a86b1	16112651	0xbbd5a308c9781f0b9e4c3f4810aeb99d4576cd5bba3fb7716b2f780cc5f2b18e
67203	0x678e75f5da2d99a665c7ad0245c19940f51cd6cfea92562399d8a156d56cad39	0x75e89d5979e4f6fba9f97c104c2f0afb3f1dcb88	0xd417144312dbf50465b1c641d016962017ef6240	0	0xa9059cbb000000000000000000000000839d4641f97153b0ff26ab837860c479e2bd02420000000000000000000000000000000000000000000001afea1e06871726580e	16112651	0xbbd5a308c9781f0b9e4c3f4810aeb99d4576cd5bba3fb7716b2f780cc5f2b18e
67204	0x75ea096ca000031790c968cdff18ca4ad833882301fdf879dbc003d2080485d5	0x95a9bd206ae52c4ba8eecfc93d18eacdd41c88cc	0xf1e3a19e6a2edf1357e84578b1c8d123757aadcf	8720000000000000	0x	16112651	0xbbd5a308c9781f0b9e4c3f4810aeb99d4576cd5bba3fb7716b2f780cc5f2b18e
67209	0x8ebfc7485c62650df1b3d522f99e194232767988d034e87aa9a25545b727ce70	0x7d411c4279a96069fe32de0c0eab4a964e8ed9c4	0x1a5e7543c7d5fe456e977b794b79fe31d65ba377	632000000000000	0x	16112651	0xbbd5a308c9781f0b9e4c3f4810aeb99d4576cd5bba3fb7716b2f780cc5f2b18e
67211	0x3d591527bf5687db2bce591ac314b01c9248ad4c918508595175db35cf79b01d	0x9696f59e4d72e237be84ffd425dcad154bf96976	0xdac17f958d2ee523a2206206994597c13d831ec7	0	0xa9059cbb000000000000000000000000d268a0789e8f5b33fe55491dd805a8b362b87bb2000000000000000000000000000000000000000000000000000000000f6c34f0	16112651	0xbbd5a308c9781f0b9e4c3f4810aeb99d4576cd5bba3fb7716b2f780cc5f2b18e
67212	0x9c3b2c08a6ea30acd26bc8a7764f574cf739c19c27831858616dd87ddb2a2aa8	0x74dec05e5b894b0efec69cdf6316971802a2f9a1	0x5e153b33d89cac7f7073344c80834c9a0ed98bac	1e+18	0x	16112651	0xbbd5a308c9781f0b9e4c3f4810aeb99d4576cd5bba3fb7716b2f780cc5f2b18e
67213	0x6a5e4d1660f6cd3053157f8f0b22829a32b4c2ed2e390c813152c1e9f0c8c4e3	0x09b3492c9121ee69e3b807f63186d63b3d2ac568	0xf89d7b9c864f589bbf53a82105107622b35eaa40	7.97e+16	0x	16112651	0xbbd5a308c9781f0b9e4c3f4810aeb99d4576cd5bba3fb7716b2f780cc5f2b18e
67215	0x53cff89f28fb53bf25d7912e0ee9e0a2467a7e40b6b997b709dafb2e0443be4c	0x108bb720d641a13213be8453b4a9995adf4e777f	0xf89d7b9c864f589bbf53a82105107622b35eaa40	6.17e+16	0x	16112651	0xbbd5a308c9781f0b9e4c3f4810aeb99d4576cd5bba3fb7716b2f780cc5f2b18e
67216	0xc9ce91b36cf91468bf5db21a1ce7ddecbba0491d4a7731ec72a6f99611c9f56a	0x95a9bd206ae52c4ba8eecfc93d18eacdd41c88cc	0x985757796cdf6f59a5e4260054e71e3169d32dfa	8720000000000000	0x	16112651	0xbbd5a308c9781f0b9e4c3f4810aeb99d4576cd5bba3fb7716b2f780cc5f2b18e
67217	0xb78d582da5673b9c256170c7a0fe9d9cf2d84896f0ab4b30e542a2bb1fa9e1d9	0xddfabcdc4d8ffc6d5beaf154f18b778f892a0740	0xda15e3ed41286cc51444d2940697029471e2dc38	8720000000000000	0x	16112651	0xbbd5a308c9781f0b9e4c3f4810aeb99d4576cd5bba3fb7716b2f780cc5f2b18e
67218	0x821bfc1f0c9a8a447e75bc913cd08dd53949a9c20eeb49c8b5ec33a7aedfadc8	0x3cd751e6b0078be393132286c442345e5dc49699	0xb11079aede3ca3827dd8c97fd17a20b34cc120a6	8720000000000000	0x	16112651	0xbbd5a308c9781f0b9e4c3f4810aeb99d4576cd5bba3fb7716b2f780cc5f2b18e
67219	0x9b82568aac31dec6b8d7fde23165a91c5dfc118732cd930428a5d6d959c43658	0x40541db1c46d53131283d9bbad52075fb8839c07	0xf89d7b9c864f589bbf53a82105107622b35eaa40	7.97e+16	0x	16112651	0xbbd5a308c9781f0b9e4c3f4810aeb99d4576cd5bba3fb7716b2f780cc5f2b18e
67220	0x341979b7178bafedaf8121e094f18d561c9c9de55138d5392eb0fa571576bfeb	0x95a9bd206ae52c4ba8eecfc93d18eacdd41c88cc	0x2e23c6eb38af2a41693e42a5eb87d99ee3a213a7	8720000000000000	0x	16112651	0xbbd5a308c9781f0b9e4c3f4810aeb99d4576cd5bba3fb7716b2f780cc5f2b18e
67222	0xcac3db8f2effe52f595ac26e4b0532ccaf1ac1ee72ca0f6f5a04e86226be7386	0x71660c4005ba85c37ccec55d0c4493e66fe775d3	0x53395065cb7153ab72d9b99214756cf3951d73c2	8720000000000000	0x	16112651	0xbbd5a308c9781f0b9e4c3f4810aeb99d4576cd5bba3fb7716b2f780cc5f2b18e
67227	0x4d37a9862bbd4320aa47d50d750d28991ff5d7bc35bc69828898525507a94d37	0x71660c4005ba85c37ccec55d0c4493e66fe775d3	0xbc0370032983cfbdef93a37f64ade1716a65c5eb	8720000000000000	0x	16112651	0xbbd5a308c9781f0b9e4c3f4810aeb99d4576cd5bba3fb7716b2f780cc5f2b18e
67228	0x0603a23c18a0578d6875f4865e7a0a3bf32a5474fcd00e9bc9e74a9b5c0cdd3f	0x95a9bd206ae52c4ba8eecfc93d18eacdd41c88cc	0x8a49ddb0a05e719077f1b86894ed1832c304859a	8720000000000000	0x	16112651	0xbbd5a308c9781f0b9e4c3f4810aeb99d4576cd5bba3fb7716b2f780cc5f2b18e
67230	0x9c01351851b0956bd372380463e3fe928bf763838946580d68c67b67465b2fbd	0x3cd751e6b0078be393132286c442345e5dc49699	0x0030812259439cb96ced65e3b226d08a77781384	8720000000000000	0x	16112651	0xbbd5a308c9781f0b9e4c3f4810aeb99d4576cd5bba3fb7716b2f780cc5f2b18e
67233	0x00cdc10ff52708092b0200ae420833957ba13a041516dddf5deca612726193be	0x340f4dffb3148a7817f58e993edc743de4eb2e57	0xc02aaa39b223fe8d0a0e5c4f27ead9083c756cc2	0	0x2e1a7d4d0000000000000000000000000000000000000000000000020a7b1dde2bede730	16112651	0xbbd5a308c9781f0b9e4c3f4810aeb99d4576cd5bba3fb7716b2f780cc5f2b18e
67234	0xb01c02e9b5f23d12ec9296da9a06b521c9d5841be37d0d0e4ce1cda4e4960cb0	0x10763988715993eaf59905029ce3414ada0b5200	0xfc35515a1bafb9def052d82459598cf74edb8888	0	0x01db0000000017ff87d1275c6b8f000017f5e3f646dcb3c5021a60594a405d53811d3bc4766596efd80fd545a2700002a697e7d56a0408570ba1a7852de36350f7713906ec0102a692c7b5ce4cb0e5483f3365c1449f21578ee9f21a0102a6	16112651	0xbbd5a308c9781f0b9e4c3f4810aeb99d4576cd5bba3fb7716b2f780cc5f2b18e
67235	0x2ef601ab026b862ab2a7eabb603a0c38e18ee9b83e9690392498d7bbbe20d6cb	0x1de4a7c6e7cda70a7657996184bd4f252f114f66	0x6cc1b572f8e51e7dc38d82d7bffd3261999fc892	4e+17	0x	16112651	0xbbd5a308c9781f0b9e4c3f4810aeb99d4576cd5bba3fb7716b2f780cc5f2b18e
67236	0xc5a5b2db45089dee3f45cb9109c316ef1b877cb0f7fc243e55cfe47dfa5a5686	0x54a423869cc5957600e8c9fa6aa41ce214888888	0x6614e521c65b02bf77c9edfe0c4c05e1a10e6baf	0	0x42842e0e00000000000000000000000054a423869cc5957600e8c9fa6aa41ce214888888000000000000000000000000f64edb06673eb5be70953bd1ab473b5143b0830200000000000000000000000000000000000000000000000000000000000000a3360c6ebe	16112651	0xbbd5a308c9781f0b9e4c3f4810aeb99d4576cd5bba3fb7716b2f780cc5f2b18e
67238	0xdf19e8ac5a12169c9b34efebd9ff208e31c12a0fc1a9dec6403883d31cc44678	0x710bda329b2a6224e4b44833de30f38e7f81d564	0xb8901acb165ed027e32754e0ffe830802919727f	0	0x23c452cd0000000000000000000000004745eec2040f2cd87804e93638dc66d463cdd1fb00000000000000000000000000000000000000000000000000294630b8afd50afbd6e3a65215232ec32a4a909a1da5234fe2c56d34c4cabbf2cc93e4f85444660000000000000000000000000000000000000000000000000006ea7f347e2beb	16112651	0xbbd5a308c9781f0b9e4c3f4810aeb99d4576cd5bba3fb7716b2f780cc5f2b18e
67239	0xb9d4ea1cbeed7e84f7656cbfd47a8e0e9b4267a6ae2b67b43ac7ecdae8d3d7ef	0x503828976d22510aad0201ac7ec88293211d23da	0xf8ac1cb05d686da9c717b28c36db9354c485071b	8720000000000000	0x	16112651	0xbbd5a308c9781f0b9e4c3f4810aeb99d4576cd5bba3fb7716b2f780cc5f2b18e
67240	0x4b4594d7f7705879e18677202ce6bf6bb6921ca473c41202a98a692b963c3073	0xb18ccf69940177f3ec62920ddb2a08ef7cb16e8f	0xd249942f6d417cbfdcb792b1229353b66c790726	0	0xd4fae269000000000000000000000000e1573b9d29e2183b1af0e743dc2754979a40d237000000000000000000000000853d955acef822db058eb8505911ed77f175b99e0000000000000000000000000000000000000000000000ced5465d60ccb4731b00000000000000000000000000000000000000000000002a9d676d6e40b001a3	16112651	0xbbd5a308c9781f0b9e4c3f4810aeb99d4576cd5bba3fb7716b2f780cc5f2b18e
67242	0x8c2ffb5f85524654905d1c296ff6272bdb3fb3ccfe31b882939e61fe3f2dcd1a	0x252983ea0af117575c843514be54af8fe91ee8e9	0x9507c04b10486547584c37bcbd931b2a4fee9a41	16112651	0x6301000000000000000bdbc35d70000000000000000011d52190000100000000000000000000000000002cfa41e4a81ddac17f958d2ee523a2206206994597c13d831ec7d51a44d3fae010294c616388b506acda1bfaae4602	16112651	0xbbd5a308c9781f0b9e4c3f4810aeb99d4576cd5bba3fb7716b2f780cc5f2b18e
67243	0x21834d5326b6f68f7de71835b2280b46cec7d6ff5bc918e22fc18ae860e2bd9e	0x86ce119ccebcc254d62c335c97afe1ba2a697aef	0x60e4d786628fea6478f785a6d7e704777c86a7c6	0	0xa22cb4650000000000000000000000001e0049783f008a0085193e00003d00cd54003c710000000000000000000000000000000000000000000000000000000000000001	16112651	0xbbd5a308c9781f0b9e4c3f4810aeb99d4576cd5bba3fb7716b2f780cc5f2b18e
67245	0x735517d2f18978524a4394496ae180e3004bbacd9a65bf46ec092ac2f0a5cae5	0x89d0f20e0e0f8393a0162f55e22aaeb111267fb1	0x000000000000ad05ccc4f10045630fb830b95127	4.63e+16	0x9a1fc3a7000000000000000000000000000000000000000000000000000000000000004000000000000000000000000000000000000000000000000000000000000003c000000000000000000000000000000000000000000000000000000000000000e0000000000000000000000000000000000000000000000000000000000000001c5133ee6f9b169aafcb9958367de48757376296ee54539af5cbfaa04bb57b33140959e36e67ae0f2c7b16fb6dc116252577d9d39a2603ad848d380f009d7e6ff200000…	16112651	0xbbd5a308c9781f0b9e4c3f4810aeb99d4576cd5bba3fb7716b2f780cc5f2b18e
67247	0xfd7afe1c4350fb96c0ad497f00c8a469b7414c305f21712ebd7cf2cf8032ac7b	0x49d5b6e3ecd39273bdcb00b23d4b53b0a6168656	0xfa18ad04e626b190a39b85979dce1fdefd867e3d	0	0xa22cb465000000000000000000000000f849de01b080adc3a814fabe1e2087475cf2e3540000000000000000000000000000000000000000000000000000000000000001	16112651	0xbbd5a308c9781f0b9e4c3f4810aeb99d4576cd5bba3fb7716b2f780cc5f2b18e
67248	0x82f2fcfd7b8829e489a7999f5f3299800e413182ba59eb260ed89a66653aeb18	0x75e89d5979e4f6fba9f97c104c2f0afb3f1dcb88	0xa0b86991c6218b36c1d19d4a2e9eb0ce3606eb48	0	0xa9059cbb000000000000000000000000f8bf33c6f0c8a549eff2c09eb2f7ba23a454d14c000000000000000000000000000000000000000000000000000000000249f000	16112651	0xbbd5a308c9781f0b9e4c3f4810aeb99d4576cd5bba3fb7716b2f780cc5f2b18e
67249	0x1f2acdd33a4955e72e863e5122c3eb131e8e9cfc089973b695381314c0dd94ce	0xd1faf168a2e25c2bf15f856453e457f2f3c216ff	0x27bb51f6f12769d7bdf212b9f876f9c56fa57a74	2000000000000000	0x	16112651	0xbbd5a308c9781f0b9e4c3f4810aeb99d4576cd5bba3fb7716b2f780cc5f2b18e
67251	0x8bfce1fe649f233f4762b63819ca1e17a91fe2bc70b4796bb9d4b772ed9c60e4	0x6dfc34609a05bc22319fa4cce1d1e2929548c0d7	0xe9ffe800f68cc66787687d50b0afc1d8255dff73	1.29e+18	0x	16112651	0xbbd5a308c9781f0b9e4c3f4810aeb99d4576cd5bba3fb7716b2f780cc5f2b18e
67253	0xd87729a5b8ddb789f334904049130235f0b2abbe3f890a503b7cef3ad4bd5aaa	0x301cc218009608e59f9647f4b7dd8a49be8493af	0x44e94034afce2dd3cd5eb62528f239686fc8f162	0	0x26c858a4000000000000000000000000153d59e1857aec9efe029f684d805f701fb078dc0000000000000000000000000000000000000000000000000000000060d9f0f0000000000000000000000000000000000000000000000000000000000000000200000000000000000000000000000000000000000000000000000000000000c00000000000000000000000000000000000000000000000000000000000000120000000000000000000000000301cc218009608e59f9647f4b7dd8a49be8493af00000…	16112651	0xbbd5a308c9781f0b9e4c3f4810aeb99d4576cd5bba3fb7716b2f780cc5f2b18e
67255	0x277f3a628fc3dac84cfe89518e9be8fccc2753cf869ae8c4227971113ca115b8	0x9cd3e1145c81b7aeb5190d477471d9a3359ab00e	0x68b3465833fb72a70ecdf485e0e4c7bd8665fc45	0	0x5ae401dc00000000000000000000000000000000000000000000000000000000638cd227000000000000000000000000000000000000000000000000000000000000004000000000000000000000000000000000000000000000000000000000000000020000000000000000000000000000000000000000000000000000000000000040000000000000000000000000000000000000000000000000000000000000016000000000000000000000000000000000000000000000000000000000000000e4472b4…	16112651	0xbbd5a308c9781f0b9e4c3f4810aeb99d4576cd5bba3fb7716b2f780cc5f2b18e
67256	0xf0a4090f9d31ee8a47a40a51dc87be4ead87e1d4024c66be1d4df9a0aa018a6c	0xf4b4e6fcd0cfb6e3d70821c136b9c5aa0e0936f2	0x0c3de458b51a11da7d4616f42f66c861e3859d3e	0	0xf5b22c2a0000000000000000000000006ae0cdc5d2b89a8dcb99ad6b3435b3e7f72900770000000000000000000000000000000000000000000000000e31e35cf325740000000000000000000000000000000000000000000195e4912901c3400000000000000000000000000000000000000000000000000196fe1660729ef000000000000000000000000000000000000000000000000000000000000000000000000000000000000000000000000059141af2478701c6e3aaf5848a7abe2751f029c3	16112651	0xbbd5a308c9781f0b9e4c3f4810aeb99d4576cd5bba3fb7716b2f780cc5f2b18e
67257	0x53e98a91d5b5e6d4fea0c6740625c1f7cdc7484c1977b95c51ef2410800ef72e	0xc36c85d2298366e1822017cbc9c9893b9e520274	0xc02aaa39b223fe8d0a0e5c4f27ead9083c756cc2	0	0x095ea7b3000000000000000000000000881d40237659c251811cec9c364ef91dc08d300cffffffffffffffffffffffffffffffffffffffffffffffffffffffffffffffff	16112651	0xbbd5a308c9781f0b9e4c3f4810aeb99d4576cd5bba3fb7716b2f780cc5f2b18e
67258	0x563eaeabb3072a485ddaa5f7957dd8e25fb13e7ca2f1a4cea64bd80403eb6d92	0x4d521577f820525964c392352bb220482f1aa63b	0xb39bae8bc7003bf25b81a03d00006f70b900007c	252771922	0x3b022102308030000000000511b815efb8f581194ae79006d24e0d814b7697f63416cf6c708da44db2624d63ea0aaef7113527c600000000000000000000be5c5dfb2e8135be71230c6b1b4045696d41c09db0414226	16112651	0xbbd5a308c9781f0b9e4c3f4810aeb99d4576cd5bba3fb7716b2f780cc5f2b18e
67259	0x50c81acb3c954f304f10b342fecea155490e28c93ba306d12007bee779329256	0xe9f82f15910e161999777036e20cb4108f4df800	0x9799b475dec92bd99bbdd943013325c36157f383	25877	0x78e111f600000000000000000000000037deb98d7fcac41e581d4b3c8f23d35b1f0247460000000000000000000000000000000000000000000000000000000000000040000000000000000000000000000000000000000000000000000000000000016446446503000000000000000000000000c697051d1c6296c24ae3bcef39aca743861d9a810000000000000000000000007fc66500c84a76ad7e9c93437bfc5ac33e2ddae9000000000000000000000000c02aaa39b223fe8d0a0e5c4f27ead9083c756…	16112650	0x5713cc306bd06ae19e8a3e3848ac6ca093172c6bb29b06498c08da2ddcb1032a
67260	0xd4ee614fc0b3917cc61064e2ac8b4440c5e8a8dfaaa3b597a59ce891295b40e0	0x60b86af869f23aeb552fb7f3cabd11b829f6ab2f	0xa57bd00134b2850b2a1c55860c9e9ea100fdd6cf	31494	0x1cff79cd0000000000000000000000004cf47f6a7a8a85a595d2eba7a5965df85f17b60800000000000000000000000000000000000000000000000000000000000000400000000000000000000000000000000000000000000000000000000000000164ad6080fe0000000000000000000000000d4a11d5eeaac28ec3f61d100daf4d40471f1852000000000000000000000000c02aaa39b223fe8d0a0e5c4f27ead9083c756cc2000000000000000000000000dac17f958d2ee523a2206206994597c13d831…	16112650	0x5713cc306bd06ae19e8a3e3848ac6ca093172c6bb29b06498c08da2ddcb1032a
67261	0xf83e91bf9c76b590272934d720cc0e655b76cba72ddb6c144aa080222cfa1541	0xb2e37baf3ac5e20deba43e0aa6ca505cdc494fa9	0xa0b86991c6218b36c1d19d4a2e9eb0ce3606eb48	0	0x095ea7b3000000000000000000000000cee284f754e854890e311e3280b767f80797180dffffffffffffffffffffffffffffffffffffffffffffffffffffffffffffffff	16112650	0x5713cc306bd06ae19e8a3e3848ac6ca093172c6bb29b06498c08da2ddcb1032a
67262	0x39217ade53b37fd19eb0215d3b08fa739b6709a8c458a473259c743361885292	0x767136d641f5e9c0880f0c850a51267a1c7eaeed	0x6a9f9d6f5d672a9784c5e560a9648de6cbe2c548	0	0x78c77a2400000000000000000000000000000000000000000000023dea9ceb40b7410000	16112650	0x5713cc306bd06ae19e8a3e3848ac6ca093172c6bb29b06498c08da2ddcb1032a
67263	0xd2e0b38e55dd447231c1ed8ff041f6e6704a3773fbb3af70333bcdd3aa9bb634	0xe41e59b5ed5e5540014d830969c027115ca8fccb	0x613a983742564500c31384b987fd06fa689bf060	0	0x2da03409000000000000000000000000f414c827268d97f930e30de348c36b5513dbe023000000000000000000000000a0b86991c6218b36c1d19d4a2e9eb0ce3606eb48	16112650	0x5713cc306bd06ae19e8a3e3848ac6ca093172c6bb29b06498c08da2ddcb1032a
67264	0xadad93b4835bfc5e13bc1f0f57e0520224ef01c75a02967dd33658ab4a964059	0x2a7f79ca9e4200c4183a504f5d8f53eac31a1f65	0x292f04a44506c2fd49bac032e1ca148c35a478c8	3.2e+17	0x	16112650	0x5713cc306bd06ae19e8a3e3848ac6ca093172c6bb29b06498c08da2ddcb1032a
67267	0xffa1ea78087a2bfe184947f8fb1217caeb12969a22fa0483b9eabc82ff941eff	0x5009cd79c0a2f930dff5841ab0843e6addf93db3	0xdac17f958d2ee523a2206206994597c13d831ec7	0	0xa9059cbb000000000000000000000000f89d7b9c864f589bbf53a82105107622b35eaa400000000000000000000000000000000000000000000000000000000013bc2f60	16112650	0x5713cc306bd06ae19e8a3e3848ac6ca093172c6bb29b06498c08da2ddcb1032a
67268	0x187d32edb9af687fe6c98bf7031339ff6208ff82ba8bc4cd433aaaf409875554	0x4bcb66c5580ae6e8d2064d65f0e04c66c5b65ea2	0xdac17f958d2ee523a2206206994597c13d831ec7	0	0xa9059cbb000000000000000000000000f89d7b9c864f589bbf53a82105107622b35eaa4000000000000000000000000000000000000000000000000000000000115218af	16112650	0x5713cc306bd06ae19e8a3e3848ac6ca093172c6bb29b06498c08da2ddcb1032a
67269	0x92facf8086649ceef680108e62e98d6ac37a0b0eb46d88c271684face88a604c	0xd7d3cea8c8d3e38d9b4227d53c0828b3584a4d15	0xa0b86991c6218b36c1d19d4a2e9eb0ce3606eb48	0	0x095ea7b3000000000000000000000000def1c0ded9bec7f1a1670819833240f027b25effffffffffffffffffffffffffffffffffffffffffffffffffffffffffffffffff	16112650	0x5713cc306bd06ae19e8a3e3848ac6ca093172c6bb29b06498c08da2ddcb1032a
67270	0x536835e1455ae14b19a60d8e7a4302ce22f72590ea3a22151dc8f87dc61fa40d	0x397bf540b9cc125927a38504ef7920b5f6fbc155	0x6352a56caadc4f1e25cd6c75970fa768a3304e64	500000000000000	0x90411a320000000000000000000000006d8e9bd8f845f51a224e216b6dd25d5e593d8dd3000000000000000000000000000000000000000000000000000000000000006000000000000000000000000000000000000000000000000000000000000001c0000000000000000000000000eeeeeeeeeeeeeeeeeeeeeeeeeeeeeeeeeeeeeeee000000000000000000000000dac17f958d2ee523a2206206994597c13d831ec70000000000000000000000006d8e9bd8f845f51a224e216b6dd25d5e593d8dd300000…	16112650	0x5713cc306bd06ae19e8a3e3848ac6ca093172c6bb29b06498c08da2ddcb1032a
67271	0xbabbad375f047552c9836152877daac5e96f88b0504e98d43076ddb21b1ff77c	0x95222290dd7278aa3ddd389cc1e1d165cc4bafe5	0x388c818ca8b9251b393131c08a736a67ccb19297	4.81e+17	0x	16112650	0x5713cc306bd06ae19e8a3e3848ac6ca093172c6bb29b06498c08da2ddcb1032a
67272	0x37b43fe5e4f88d01965600b4b6552067bfd911729cb7d6301ec5f14b5e29893e	0xfe2a236eee5790ed9c90c8776fa80f927733e153	0x021d76dc64777ae1f88bec24569d028c0751dce9	6550000000000000	0x	16112650	0x5713cc306bd06ae19e8a3e3848ac6ca093172c6bb29b06498c08da2ddcb1032a
67276	0x5d896a824587d05f63ab54aa529dc2b506b67fc0b1bd1bdc7f0ee130290e09aa	0x91aae0aafd9d2d730111b395c6871f248d7bd728	0x98c3d3183c4b8a650614ad179a1a98be0a8d6b8e	0	0x49c36c070000000000000000000000002e4784446a0a06df3d1a040b03e1680ee266c35a000000000000000000000000000000000000000000000019822587efa5d1730200000000000000000000000000000000000000000e5cfb785d73ec000000000000000000000000000000000000000000000000000e5896493bc32100000000000000000000000000000000000000000000000000000000000000000000000001	16112650	0x5713cc306bd06ae19e8a3e3848ac6ca093172c6bb29b06498c08da2ddcb1032a
67279	0xc0e28a27c67833c706d82c0d5cc040b147417160d437aae80debb03aa6f530e3	0x747dbfbcfb74fd5fc115896c758a2fdff581c702	0x283af0b28c62c092c9727f1ee09c02ca627eb7f5	0	0xf14fcbc8afb01fdc188d1d0866edd930e331653b60c3120ae17776f823c5f0966508fc73	16112650	0x5713cc306bd06ae19e8a3e3848ac6ca093172c6bb29b06498c08da2ddcb1032a
67280	0x5564653fb1ff833835a21e8a4c0fb2f642dddf1344446824acc4a8c7f644593f	0x24affae9c683b7615d4130300288e348e4b5d091	0x5050e08626c499411b5d0e0b5af0e83d3fd82edf	56597	0x78e111f600000000000000000000000054f990cdcfb6980c720818f2395cfff61b181fc2000000000000000000000000000000000000000000000000000000000000004000000000000000000000000000000000000000000000000000000000000000c41f3cc1fe0000000000000000000000000000000000000000000000000000001c34d643de00000000000000000000000000000000000000000000000011921bca15589000000000000000000000000000000000000000000000025413b3c9ff2657380…	16112650	0x5713cc306bd06ae19e8a3e3848ac6ca093172c6bb29b06498c08da2ddcb1032a
67282	0xfffce6e23c246bbefc69f33b98f0a13717cb2f2040bbff208ed40a185f8de517	0xbb4452482320bea8787458b31f71906c6862d2ca	0xf71530c1f043703085b42608ff9dcccc43210a8e	0	0x89eaa45c0000000000000000000000000000000000000000000000056fb91b23f457f51d0000000000000000000000000000000000000000000000056f50b960d0ad26120208005800000000000000041573e3079e25c6ea020088e6a0c2ddd26feeb64f039a2c41296fcb3f564003008ad599c3a0ff1de082011efddc58f1908eb6e6d8	16112650	0x5713cc306bd06ae19e8a3e3848ac6ca093172c6bb29b06498c08da2ddcb1032a
67283	0xbd7efccd73a4b5ae8baa9492593f48a3d31ca2a163ac82ebaa0c9f4b911dbed4	0x065e3dbafcb2c26a978720f9eb4bce6ad9d644a1	0xa57bd00134b2850b2a1c55860c9e9ea100fdd6cf	5894	0x1cff79cd0000000000000000000000004cf47f6a7a8a85a595d2eba7a5965df85f17b60800000000000000000000000000000000000000000000000000000000000000400000000000000000000000000000000000000000000000000000000000000164ad6080fe00000000000000000000000006da0fd433c1a5d7a4faa01111c044910a184553000000000000000000000000c02aaa39b223fe8d0a0e5c4f27ead9083c756cc2000000000000000000000000dac17f958d2ee523a2206206994597c13d831…	16112650	0x5713cc306bd06ae19e8a3e3848ac6ca093172c6bb29b06498c08da2ddcb1032a
67284	0x05b049aa759552f3c43ed7d6e31ed37e1c80c72d42a350cf7ce61adb48edc963	0xf60c2ea62edbfe808163751dd0d8693dcb30019c	0xa0b86991c6218b36c1d19d4a2e9eb0ce3606eb48	0	0xa9059cbb00000000000000000000000049c3e37602a18c1ff1ebee1f93c308de2340e97f00000000000000000000000000000000000000000000000000000000d0a78700	16112650	0x5713cc306bd06ae19e8a3e3848ac6ca093172c6bb29b06498c08da2ddcb1032a
67286	0xa7756604018b49551c132b8f50412db13e0e20f2f1a2f78e9bc0a80ea45ad4b6	0xe03454a9284d8ea08f536cfb669bc0ac66d08d0e	0x1111111254eeb25477b68fb85ed929f73a960582	1.7e+16	0x0502b1c50000000000000000000000000000000000000000000000000000000000000000000000000000000000000000000000000000000000000000003c6568f12e8000000000000000000000000000000000000000000000000dacfd68333f1a6c3a270000000000000000000000000000000000000000000000000000000000000080000000000000000000000000000000000000000000000000000000000000000180000000000000003b6d03409b5e338d5c3b5735a8fc497d0bbbe9f8d3d0e3d8e26b9…	16112650	0x5713cc306bd06ae19e8a3e3848ac6ca093172c6bb29b06498c08da2ddcb1032a
67287	0xbc1a387b729973e2d7e01c60c0ae6a8c4f7500f6c528789f79075ae6cb9acf04	0x1c8f6a5f009e051cab9c3851ca2da2c936b2775a	0xa69babef1ca67a37ffaf7a485dfff3382056e78c	3846	0x1cff79cd000000000000000000000000464e809fc0c122aa855c4c8f88782fdbb826cc2f000000000000000000000000000000000000000000000000000000000000004000000000000000000000000000000000000000000000000000000000000000c4588116d800000000000000000000000000000000000000000000000000000021424ca3ad00000000000000000000000000000000000000000000000011933ed3e3ac9000000000000000000000000000000000000000000000025426fc211a61c4752…	16112650	0x5713cc306bd06ae19e8a3e3848ac6ca093172c6bb29b06498c08da2ddcb1032a
67288	0x36e5c1cd0d1c85cc2dd45785b33ac0d594ddc80523605f1b12a79563ec88d4a5	0x46340b20830761efd32832a74d7169b29feb9758	0x1eb5946470c287f0dee0e72c9627f3484be96d0b	7.58e+16	0x	16112650	0x5713cc306bd06ae19e8a3e3848ac6ca093172c6bb29b06498c08da2ddcb1032a
67289	0x8116dc3173bc8e20f24053a89fb92fde5606450a69cd0d0f98130c4d0cef06e8	0x4451ad10c67f679fc90cf4937d3950db27e9e80b	0x4afd163f281ed126cb07eaf99f52d8a083e135e3	0	0xb364deb200000000000000000000000000000000000000000000000000000000000027da000000000000000000000000000000000000000000000000000000000000000100000000000000000000000000000000000000000000000000000000638e1ea3000000000000000000000000000000000000000000000000000000000000000100000000000000000000000000000000000000000000000000000000000000a000000000000000000000000000000000000000000000000000000000000000411375d…	16112650	0x5713cc306bd06ae19e8a3e3848ac6ca093172c6bb29b06498c08da2ddcb1032a
67290	0x6e01300e17a260c7c73527b2f89d9d76d068ed0a30751a0f59b7f87f0fe41ab1	0xd878a1ca3c2ce1d5882861f0f82c71b137590fa2	0x6dfc34609a05bc22319fa4cce1d1e2929548c0d7	3.13e+17	0x	16112650	0x5713cc306bd06ae19e8a3e3848ac6ca093172c6bb29b06498c08da2ddcb1032a
67291	0x9256521b338f16db25ce271f78874412961af4064a87bbd701643cdabe56da78	0x46340b20830761efd32832a74d7169b29feb9758	0xdac17f958d2ee523a2206206994597c13d831ec7	0	0xa9059cbb0000000000000000000000005fb80292629d3486ff89ba52d1ca76e0824bd129000000000000000000000000000000000000000000000000000000011d819980	16112650	0x5713cc306bd06ae19e8a3e3848ac6ca093172c6bb29b06498c08da2ddcb1032a
67292	0x9f8f59ea2bc021c5b0a096b69eafe64f5e086e02b11e798a88d4f44165a56d6f	0xe83d825d488c525e7d781c2628b1c705bdf6eef5	0x7492e30d60d96c58ed0f0dc2fe536098c620c4c0	0	0xefef39a10000000000000000000000000000000000000000000000000000000000000001	16112650	0x5713cc306bd06ae19e8a3e3848ac6ca093172c6bb29b06498c08da2ddcb1032a
67293	0x0edd1aa3c9649bf27705f9983e8b0fdeb0935af5e9dd8afa84c22750c55e2f5c	0x108bb720d641a13213be8453b4a9995adf4e777f	0xdac17f958d2ee523a2206206994597c13d831ec7	0	0xa9059cbb000000000000000000000000f89d7b9c864f589bbf53a82105107622b35eaa4000000000000000000000000000000000000000000000000000000000086d97c0	16112650	0x5713cc306bd06ae19e8a3e3848ac6ca093172c6bb29b06498c08da2ddcb1032a
67294	0x3b08d504800f914db5cc07b6e3f297fe5db2a3305e5c2a045a175332df11b2e0	0xae2d4617c862309a3d75a0ffb358c7a5009c673f	0xa0b86991c6218b36c1d19d4a2e9eb0ce3606eb48	0	0xa9059cbb0000000000000000000000009bfa1c26877d428425630799d37c560187b866b700000000000000000000000000000000000000000000000000000000140a0140	16112650	0x5713cc306bd06ae19e8a3e3848ac6ca093172c6bb29b06498c08da2ddcb1032a
67296	0x5b08d3235c8bda7fac1c3c8665c2a09d3b2e484aedd1d158be37acc3ffe6a4d6	0xb0bd355dc280590b06b0bda0d27e71c985d5d640	0xd4e53e3597a2ed999d37e974f1f36b15eb879bad	0	0xa22cb46500000000000000000000000000000000000111abe46ff893f3b2fdf1f759a8a80000000000000000000000000000000000000000000000000000000000000001	16112650	0x5713cc306bd06ae19e8a3e3848ac6ca093172c6bb29b06498c08da2ddcb1032a
67297	0x9f91390c9f7c9589b7ae1aa71d923f7cece1cb9e35a21dc631c479ee037989b9	0xb51641a888474d1a3a6143a73bb3103e77f4c1ff	0x76f4eed9fe41262669d0250b2a97db79712ad855	0	0xf17a454600000000000000000000000000000000000000000000000000000000000000c000000000000000000000000000000000000000000000000000000000000001a0000000000000000000000000000000000000000000000001d118080c1448665600000000000000000000000000000000000000000000000000000000000000010000000000000000000000001d64fb0ffa8362b2e1ee7ee03929159551eab26e000000000000000000000000000000000000000000000000000000000000022000000…	16112650	0x5713cc306bd06ae19e8a3e3848ac6ca093172c6bb29b06498c08da2ddcb1032a
67299	0xc595b91d432edf2becb3a5dcee6f0a1b928b90f4ca49d57544747e45a463cb6a	0xfb9779477e5b4834bf2bc02dd29b97b344d0f700	0xa69babef1ca67a37ffaf7a485dfff3382056e78c	31494	0x1cff79cd00000000000000000000000000c9186b63349befe288565e13d0fe90c3ae9296000000000000000000000000000000000000000000000000000000000000004000000000000000000000000000000000000000000000000000000000000000c4588116d80000000000000000000000000000000000000000000000000000005ae77d1b4b00000000000000000000000000000000000000000000000011938c227e7ae0000000000000000000000000000000000000006ded8e60b0b9ec3e96ff8fd78…	16112650	0x5713cc306bd06ae19e8a3e3848ac6ca093172c6bb29b06498c08da2ddcb1032a
67300	0xb38789fbd88689e702848cf4688a079feb22e165bad7819bf4f17a728c96674a	0xab97925eb84fe0260779f58b7cb08d77dcb1ee2b	0x5b5b7c48d8c5b181ca6af8e0ec38ec9df6ebf4d2	8e+16	0x	16112650	0x5713cc306bd06ae19e8a3e3848ac6ca093172c6bb29b06498c08da2ddcb1032a
67301	0x9cc0e830e183d593acbffae94a7677740fc5680e0678142faf3d3476373c7f46	0xa5a13f62ce1113838e0d9b4559b8caf5f76463c0	0xa57bd00134b2850b2a1c55860c9e9ea100fdd6cf	36102	0x1cff79cd000000000000000000000000d0bf08c6a0661681cfd08d56455f3aaa0d3e38010000000000000000000000000000000000000000000000000000000000000040000000000000000000000000000000000000000000000000000000000000016446446503000000000000000000000000a97642500517c728ce1339a466de0f10c19034cd0000000000000000000000008f8221afbb33998d8584a2b05749ba73c37a938a000000000000000000000000c02aaa39b223fe8d0a0e5c4f27ead9083c756…	16112650	0x5713cc306bd06ae19e8a3e3848ac6ca093172c6bb29b06498c08da2ddcb1032a
67302	0xe24c8cad55d1664aa74d862cf43d1d5d2c3f66c7ced2db7193f0426dbf420ed5	0x76e40d0a69fd81826b5eb7d18145626d46eafdef	0xa57bd00134b2850b2a1c55860c9e9ea100fdd6cf	51462	0x1cff79cd0000000000000000000000004cf47f6a7a8a85a595d2eba7a5965df85f17b6080000000000000000000000000000000000000000000000000000000000000040000000000000000000000000000000000000000000000000000000000000016446446503000000000000000000000000c558f600b34a5f69dd2f0d06cb8a88d829b7420a0000000000000000000000005a98fcbea516cf06857215779fd812ca3bef1b32000000000000000000000000c02aaa39b223fe8d0a0e5c4f27ead9083c756…	16112650	0x5713cc306bd06ae19e8a3e3848ac6ca093172c6bb29b06498c08da2ddcb1032a
67304	0x29112bd58120e9330bb4f9fbcb8b706ddc93b0d6d58dc72f860b2144b9ce138e	0xae719cc3029f2845d62a203bb0f1076b8d735f4e	0xeee228be663f29eff525a704f5612f4538f082cf	722000000000000	0x	16112650	0x5713cc306bd06ae19e8a3e3848ac6ca093172c6bb29b06498c08da2ddcb1032a
67306	0x4fdbb98ba6d249bba3153f39830433133aa639653e90b4c81dd86fa073c57c0b	0x6887246668a3b87f54deb3b94ba47a6f63f32985	0x5e4e65926ba27467555eb562121fac00d24e9dd2	0	0xd0f893440002b41c2f0000940000060000000000000000000000000000000000000c00000100638ccb1c0000f5dbd400000800000000638ccb1c0000f5dbd500004800000000638ccb2b0000f5dbd500000300000000638ccb2b0000f5dbd600003400000000638ccb3a0000f5dbd6789cec7d0738967ddbf8750f9bcc6c912d2323dc5624b38c90bdb76cca4ef6dedc5a924b29242924b2f70e1925a39444913d23ffe3a5e7fd781feefb51cffbf5bdffef3b8fa323d775dee76f5dbf71ee1f00555a852a620…
67307	0xdce648bd48010c752a6311eb9f6008e4ff7f009bdbe0192279ff1861f91368d6	0x9723b6d608d4841eb4ab131687a5d4764eb30138	0xdac17f958d2ee523a2206206994597c13d831ec7	0	0xa9059cbb00000000000000000000000003deef65c9196a27f097e07afa735e801e860cc30000000000000000000000000000000000000000000000000000000001314d6c	16112650	0x5713cc306bd06ae19e8a3e3848ac6ca093172c6bb29b06498c08da2ddcb1032a
67310	0x0050a2790d4e692998c86208d50351f5c3dddb765bce3b7ecf3e6ff9f7d9b231	0x9f59f787122a5df035866591a4c78f911288f8e4	0xa0b86991c6218b36c1d19d4a2e9eb0ce3606eb48	0	0x095ea7b3000000000000000000000000881d40237659c251811cec9c364ef91dc08d300cffffffffffffffffffffffffffffffffffffffffffffffffffffffffffffffff	16112650	0x5713cc306bd06ae19e8a3e3848ac6ca093172c6bb29b06498c08da2ddcb1032a
67312	0x2df8768facc934848fb2a51a483fc52702017c4227b7e26c10d427a96db05a91	0x3998496b42f01e586ede2185269b35a06dd725f0	0x7a250d5630b4cf539739df2c5dacb4c659f2488d	2.5e+17	0x7ff36ab500000000000000000000000000000000000000000000bb213a5196ee90a8ba8500000000000000000000000000000000000000000000000000000000000000800000000000000000000000003998496b42f01e586ede2185269b35a06dd725f000000000000000000000000000000000000000000000000000000000638ccb730000000000000000000000000000000000000000000000000000000000000002000000000000000000000000c02aaa39b223fe8d0a0e5c4f27ead9083c756cc200000…	16112650	0x5713cc306bd06ae19e8a3e3848ac6ca093172c6bb29b06498c08da2ddcb1032a
67313	0x5f5fafe7b8b2d64d6957f5babc4a21515f057d4113225b38746cb16c01240aa0	0x6046945c5b5ef5933b8e73a98a6ad7bf3e031df7	0xa69babef1ca67a37ffaf7a485dfff3382056e78c	60166	0x1cff79cd000000000000000000000000fc588723ead01d032b837229577f6a532e5a0c20000000000000000000000000000000000000000000000000000000000000004000000000000000000000000000000000000000000000000000000000000000c4588116d80000000000000000000000000000000000000000000000000000008e5ccba34f00000000000000000000000000000000000000000000000011938c227e7ae0000000000000000000000000000000000000006dca56ef0efab611e8fd946c6…	16112650	0x5713cc306bd06ae19e8a3e3848ac6ca093172c6bb29b06498c08da2ddcb1032a
67314	0x9d7e4285909b257fd2d157c96dd26cbed33fb37cdabb4ea2aade16e37845b912	0xbbad96336943a36e3e292d973b3382dd0ba4d1ef	0xa57bd00134b2850b2a1c55860c9e9ea100fdd6cf	26886	0x1cff79cd0000000000000000000000004cf47f6a7a8a85a595d2eba7a5965df85f17b60800000000000000000000000000000000000000000000000000000000000000400000000000000000000000000000000000000000000000000000000000000164ad6080fe000000000000000000000000397ff1542f962076d0bfe58ea045ffa2d347aca0000000000000000000000000c02aaa39b223fe8d0a0e5c4f27ead9083c756cc2000000000000000000000000a0b86991c6218b36c1d19d4a2e9eb0ce3606e…	16112650	0x5713cc306bd06ae19e8a3e3848ac6ca093172c6bb29b06498c08da2ddcb1032a
67315	0xf369763a1c1044c6ce21edfc233e164365175438967ff41f16c05934b7846f58	0xa76c25109b1507a8ed90447fa44358dd2354546a	0xff1f2b4adb9df6fc8eafecdcbf96a2b351680455	4.04e+16	0x7ff48afb0000000000000000000000000000000000000000000000000000000000000000000000000000000000000000000000000000000000000000008f75656407c000000000000000000000000000a76c25109b1507a8ed90447fa44358dd2354546a0000000000000000000000000000000000000000000000000000000000000000	16112650	0x5713cc306bd06ae19e8a3e3848ac6ca093172c6bb29b06498c08da2ddcb1032a
67316	0x586b4b02e58382902b7919c6d992896fddccfdaac912d2349309ca4676a9bf9a	0xf7858da8a6617f7c6d0ff2bcafdb6d2eedf64840	0xcd1a9f38f3deb8554472a4e329f376b18441db7d	1.67e+18	0x	16112650	0x5713cc306bd06ae19e8a3e3848ac6ca093172c6bb29b06498c08da2ddcb1032a
67317	0xe08df159232174a7242d662e02da42cf47fa2bef97560bc82b0244b2a9b02f7a	0xb93faf7baaddbff963d255eca23c65b56387a875	0x12ffaf97d0ed80bf2fb00bdb0e291be006e17934	800000000000000	0x	16112650	0x5713cc306bd06ae19e8a3e3848ac6ca093172c6bb29b06498c08da2ddcb1032a
67318	0x05d664214c7260695754a25d8f5557f6aee5b4ab850ab72ca6fa182a08257d76	0xf22a604d4849151bf34db8ee5fa10a69c5f24f8b	0x7d655c57f71464b6f83811c55d84009cd9f5221c	0	0x9120491c00000000000000000000000000000000000000000000000000000000000000200000000000000000000000000000000000000000000000000000000000000000	16112650	0x5713cc306bd06ae19e8a3e3848ac6ca093172c6bb29b06498c08da2ddcb1032a
67321	0xc1208c8b485e37152ebf81aa04941a793364caf5880ac3d224b0c71216e89303	0x935f64b44b5c48a1539c4ada5161d27ace4205b5	0x8f5ebe28914b6a767a8dc20724e8ba884d1d9029	9.14e+17	0x	16112650	0x5713cc306bd06ae19e8a3e3848ac6ca093172c6bb29b06498c08da2ddcb1032a
67322	0x2edd5c1a1c99bb2ca407082cdd807bf8025b93c3039f4475bfe7c8f49b1a16eb	0xe60b13c514e9bb4124806a94cc95d17dad435cd8	0x6bdfeea58376083ce7068ce96bb541f7b8f15133	1.2e+16	0x	16112650	0x5713cc306bd06ae19e8a3e3848ac6ca093172c6bb29b06498c08da2ddcb1032a
67324	0x10ddbc65bb79222fd8d4ac2a69a143efc01a9bd1bf3cded6af5aac14d979c601	0xbf2d5d8ebf05947245b3d7f38b2776a6a49710dd	0x5050e08626c499411b5d0e0b5af0e83d3fd82edf	36870	0x78e111f60000000000000000000000005432dfebdf380285ba7a2f8906d4e3c73795c6d3000000000000000000000000000000000000000000000000000000000000004000000000000000000000000000000000000000000000000000000000000000c4588116d80000000000000000000000000000000000000000000000000000000f91df561c00000000000000000000000000000000000000000000000011933ed3e3ac90000000000000000000000000000000000000000000000254e635350a281b381…	16112650	0x5713cc306bd06ae19e8a3e3848ac6ca093172c6bb29b06498c08da2ddcb1032a
67325	0x41dd92ed4dd3b1cc92ee47ab0806b81d32ea386c5d0a392ce03455b6e7fefb51	0xb62aed303f62bef1bf9d2ed1aaaf0de853efc424	0x2cc8342d7c8bff5a213eb2cde39de9a59b3461a7	0	0xa22cb46500000000000000000000000000000000000111abe46ff893f3b2fdf1f759a8a80000000000000000000000000000000000000000000000000000000000000001	16112650	0x5713cc306bd06ae19e8a3e3848ac6ca093172c6bb29b06498c08da2ddcb1032a
67326	0x04ea176bf84515b67f9ed371dd2fb08de02b0271f550efc9423db3e18044fb21	0x063c90c876e3a64c9b196e25161bd511c52a0be6	0xdac17f958d2ee523a2206206994597c13d831ec7	0	0xa9059cbb0000000000000000000000005de50386b527204022aac0e3adf66b6391dbe047000000000000000000000000000000000000000000000000000000000121eac0	16112650	0x5713cc306bd06ae19e8a3e3848ac6ca093172c6bb29b06498c08da2ddcb1032a
67327	0xa1d36ec051d74b0efc33022717bddb090a331d28da9d0d1721c6d2003c89339a	0x8e8f818d3371f797a2db7edb32803607c8b3c6a9	0x98c3d3183c4b8a650614ad179a1a98be0a8d6b8e	0	0x49c36c07000000000000000000000000919fa96e88d67499339577fa202345436bcdaf790000000000000000000000000000000000000000000000bbe6e2786a021395e4000000000000000000000000000000000000002b73659c96f23e000000000000000000000000000000000000000000000000002b7e5cf196df100000000000000000000000000000000000000000000000000000000000000000000000000000	16112650	0x5713cc306bd06ae19e8a3e3848ac6ca093172c6bb29b06498c08da2ddcb1032a
67329	0xa9762718690f678d52e5b63b221656b75f8809ff3d1d3840046282730fd58552	0xc78cd789d1483189c919a8d4dd22004cfd867eb4	0xdac17f958d2ee523a2206206994597c13d831ec7	0	0xa9059cbb00000000000000000000000094c394ccd0965a35412ce9ffcd70227f2a2be0f3000000000000000000000000000000000000000000000000000000003b9aca00	16112650	0x5713cc306bd06ae19e8a3e3848ac6ca093172c6bb29b06498c08da2ddcb1032a
67330	0xe34cad3b99cae7ab0535bd0bc7a8d3d11457518aa40384793bca87c7b88c51da	0xf03f0a004ab150bf46d8e2df10b7ebd89ed39f0e	0x00000000006c3852cbef3e08e8df289169ede581	0	0xfd9f1e10000000000000000000000000000000000000000000000000000000000000002000000000000000000000000000000000000000000000000000000000000000010000000000000000000000000000000000000000000000000000000000000020000000000000000000000000f03f0a004ab150bf46d8e2df10b7ebd89ed39f0e000000000000000000000000004c00500000ad104d7dbd00e3ae0a5c00560c00000000000000000000000000000000000000000000000000000000000000016000000…	16112650	0x5713cc306bd06ae19e8a3e3848ac6ca093172c6bb29b06498c08da2ddcb1032a
67332	0xe27d76879af5c9350255323ebd685187a1423a453ff807aadb36dfcec6eec8ff	0xf89d7b9c864f589bbf53a82105107622b35eaa40	0x1a4b46696b2bb4794eb3d4c26f1c55f9170fa4c5	0	0xa9059cbb00000000000000000000000089434d3da18a5cabfa9b77e6ba4f14dbc06a4d230000000000000000000000000000000000000000000000091a12db53961af400	16112650	0x5713cc306bd06ae19e8a3e3848ac6ca093172c6bb29b06498c08da2ddcb1032a
67333	0xffa742dc662846db554e3ca7601de76261c408c889f59ba8e3106e8805d48ebd	0xb7c4e90b2fea94ac9773028e9ddd1c430c67dd5e	0x977335d2f788a861e979a4307aebd37c2dd4037c	0	0x004a84cb0000000000000000000000008a69101818e3bb4a4c54820856a15eb5cdbce0ab00000000000000000000000000000000000000000000000000000000000000040000000000000000000000000000000000000000000000000000000000000001	16112650	0x5713cc306bd06ae19e8a3e3848ac6ca093172c6bb29b06498c08da2ddcb1032a
67334	0xd377fae6ae17a1d79f82e1d2f74a110883903dbed151fb8d67ebd83a5061023f	0x9cb16f800d110e195f4782c793d0806a1c72d4c6	0x3ba41db4e93ce934c87acd68ff83b6c1dbd83456	122000000000000	0x	16112650	0x5713cc306bd06ae19e8a3e3848ac6ca093172c6bb29b06498c08da2ddcb1032a
67335	0xf0bd22feba34c7a097d22ae63e8588a74d3e19bf8a8789f1455818e0d8db8ca6	0xd6dea08191aef6127f8eafd6a698f6e7909f6dba	0x00000000006c3852cbef3e08e8df289169ede581	5.18e+16	0xfb0f3ee100000000000000000000000000000000000000000000000000000000000000200000000000000000000000000000000000000000000000000000000000000000000000000000000000000000000000000000000000000000000000000000000000000000000000000000000000000000000000000000000000aa3a704a69b0000000000000000000000000004a0018c28570d4b5d14db76cc9d649b560fb49a5000000000000000000000000004c00500000ad104d7dbd00e3ae0a5c00560c0000000…	16112650	0x5713cc306bd06ae19e8a3e3848ac6ca093172c6bb29b06498c08da2ddcb1032a
67336	0x1261e91f5fff793c643bdbdd7063e4de5e1ea3998fa1e10525dba2b2225f4701	0x4453e5fb9919f7ada4fe651bc33c3334dbf6f24a	0x303389f541ff2d620e42832f180a08e767b28e10	0	0x7a37dc2c0000000000000000000000000000000000000000000000000000000000000000	16112650	0x5713cc306bd06ae19e8a3e3848ac6ca093172c6bb29b06498c08da2ddcb1032a
67337	0x2d1800e3b64ef10b9a3181cacd8e2deef7604838cf6bffa0edd91e8e8b89c291	0xf89d7b9c864f589bbf53a82105107622b35eaa40	0x1a4b46696b2bb4794eb3d4c26f1c55f9170fa4c5	0	0xa9059cbb000000000000000000000000f91df06bf9b9691f76e2bce8ace5eeac8261588500000000000000000000000000000000000000000000000c64f28846b8beec00	16112650	0x5713cc306bd06ae19e8a3e3848ac6ca093172c6bb29b06498c08da2ddcb1032a
67338	0xb60fc9e82186f49ea8f7e2518c3a345cfd7e57fe32c8654194563007c1115a79	0xff82bf5238637b7e5e345888bab9cd99f5ebe331	0xa69babef1ca67a37ffaf7a485dfff3382056e78c	64774	0x1cff79cd0000000000000000000000006ea5779219785c5e264b1ebe4054d87170ddf8ec000000000000000000000000000000000000000000000000000000000000004000000000000000000000000000000000000000000000000000000000000000c4588116d8000000000000000000000000000000000000000000000e0b57744480d5ff5bac000000000000000000000000000000000000000ffc7833875cff800000000000000000000000000000000000000000000000000007344006420481fbf5485…	16112650	0x5713cc306bd06ae19e8a3e3848ac6ca093172c6bb29b06498c08da2ddcb1032a
67339	0x26aa72de027cb40448bb02153d93dac2030efed6d15326c25f4fe495d418e176	0x1439d2e781e13995287d517ad1744065d3f0e5e4	0x084b1c3c81545d370f3634392de611caabff8148	0	0xc47f00270000000000000000000000000000000000000000000000000000000000000020000000000000000000000000000000000000000000000000000000000000000d7368696d73616172742e65746800000000000000000000000000000000000000	16112650	0x5713cc306bd06ae19e8a3e3848ac6ca093172c6bb29b06498c08da2ddcb1032a
67340	0xc87e88273b4bd64566b1d952f8a168eaf20710f4cda2b00dc8f4e6b6e4b5aa39	0xab97925eb84fe0260779f58b7cb08d77dcb1ee2b	0xb0f5dbfe6a2da9705450c402a698583a3a4e2046	8e+16	0x	16112650	0x5713cc306bd06ae19e8a3e3848ac6ca093172c6bb29b06498c08da2ddcb1032a
67341	0xcdcf71fc91b3f8a2c238f351bb8e6a239a2ae7a29daa2c29a56840e927731333	0x1a42cacb0f5b93f2569091fe9eecb627bfa34061	0x00000000006c3852cbef3e08e8df289169ede581	0	0xfd9f1e100000000000000000000000000000000000000000000000000000000000000020000000000000000000000000000000000000000000000000000000000000000100000000000000000000000000000000000000000000000000000000000000200000000000000000000000001a42cacb0f5b93f2569091fe9eecb627bfa34061000000000000000000000000004c00500000ad104d7dbd00e3ae0a5c00560c00000000000000000000000000000000000000000000000000000000000000016000000…	16112650	0x5713cc306bd06ae19e8a3e3848ac6ca093172c6bb29b06498c08da2ddcb1032a
67342	0xb5d1c963064fa678f875bbba49ba50f66599443d69765390e4380c9e34a46494	0x26bce6ecb5b10138e4bf14ac0ffcc8727fef3b2e	0xa57bd00134b2850b2a1c55860c9e9ea100fdd6cf	35590	0x1cff79cd00000000000000000000000037deb98d7fcac41e581d4b3c8f23d35b1f0247460000000000000000000000000000000000000000000000000000000000000040000000000000000000000000000000000000000000000000000000000000016446446503000000000000000000000000c697051d1c6296c24ae3bcef39aca743861d9a810000000000000000000000007fc66500c84a76ad7e9c93437bfc5ac33e2ddae9000000000000000000000000c02aaa39b223fe8d0a0e5c4f27ead9083c756…	16112650	0x5713cc306bd06ae19e8a3e3848ac6ca093172c6bb29b06498c08da2ddcb1032a
67347	0xd430f5a00b0be8c0372582e6fd95c05d4170348be0a837f23ce97b7de7e55f44	0x9e38fd76a010d9bc52a80f00802e68ac5bff88e1	0x172401c05a6f9d569d731f747d3bfd66b1c68e54	0	0x095ea7b30000000000000000000000001111111254eeb25477b68fb85ed929f73a960582ffffffffffffffffffffffffffffffffffffffffffffffffffffffffffffffff	16112650	0x5713cc306bd06ae19e8a3e3848ac6ca093172c6bb29b06498c08da2ddcb1032a
67348	0x68d617df704bd920d412b071e1b10b958362c0efb47d28477dca493528c4b2bd	0x042523db4f3effc33d2742022b2490258494f8b3	0xa69babef1ca67a37ffaf7a485dfff3382056e78c	59142	0x1cff79cd000000000000000000000000364e903b2020cafc8ff8686a02c7170ff21ce3ff000000000000000000000000000000000000000000000000000000000000004000000000000000000000000000000000000000000000000000000000000000c4588116d80000000000000000000000000000000000000000000000003a4386934084ec410000000000000000000000000000000000000000002a85362994a4200000000000000000000000000000000000000000000000046ad255ff128d632decb7e…	16112650	0x5713cc306bd06ae19e8a3e3848ac6ca093172c6bb29b06498c08da2ddcb1032a
67349	0xa95bfba4ffd67e01033c71a622720982322cea951fae70d0b8b566abc4ddb44d	0x43e4715ae093a4c86b5ecddb52216c4f879e9672	0xa57bd00134b2850b2a1c55860c9e9ea100fdd6cf	6677	0x1cff79cd000000000000000000000000a034c1f0246d728cb0f2376d5968ca53d6c8d30f0000000000000000000000000000000000000000000000000000000000000040000000000000000000000000000000000000000000000000000000000000016446446503000000000000000000000000c3f279090a47e80990fe3a9c30d24cb117ef91a8000000000000000000000000dbdb4d16eda451d0503b854cf79d55697f90c8df000000000000000000000000c02aaa39b223fe8d0a0e5c4f27ead9083c756…	16112650	0x5713cc306bd06ae19e8a3e3848ac6ca093172c6bb29b06498c08da2ddcb1032a
67351	0x87953edb0b63af7a99167718963f045618fea49e70f800fe89750ef49a0d82eb	0x077d360f11d220e4d5d831430c81c26c9be7c4a4	0xbf4e3fce82dcbb8bb07acf01da4db72e3af01229	6.97e+18	0x	16112650	0x5713cc306bd06ae19e8a3e3848ac6ca093172c6bb29b06498c08da2ddcb1032a
67352	0x44b41939187243a1818c6c15cf645daab5b147e54631067f70760ccb4b511290	0xb57fb7469da26cb735bec1328b32057401fe6390	0x7a250d5630b4cf539739df2c5dacb4c659f2488d	0	0x791ac94700000000000000000000000000000000000000000000000087a1926974d4a000000000000000000000000000000000000000000000000000000000000000000000000000000000000000000000000000000000000000000000000000000000a0000000000000000000000000b57fb7469da26cb735bec1328b32057401fe639000000000000000000000000000000000000000000000000000000000638ccbb5000000000000000000000000000000000000000000000000000000000000000200000…	16112650	0x5713cc306bd06ae19e8a3e3848ac6ca093172c6bb29b06498c08da2ddcb1032a
67353	0xed4c4bd4503215cc8fde59720fc2747bec079a868f8190a8721f7a6b5d11b6fe	0xee00bad5c80f779186403fd290bd65256d39978c	0x99c63d98a5314d363f7d8d730c8825dc807e2e42	0	0x5b70ea9f	16112650	0x5713cc306bd06ae19e8a3e3848ac6ca093172c6bb29b06498c08da2ddcb1032a
67356	0x3d184aa0643fb9233208fbef033fc645bda4f4bac246f59115ca1f5347a9e1db	0x6dfc34609a05bc22319fa4cce1d1e2929548c0d7	0xeadc622d8d5f41cfcf31476bec6daeda9d6c9463	694000000000000	0x	16112650	0x5713cc306bd06ae19e8a3e3848ac6ca093172c6bb29b06498c08da2ddcb1032a
67357	0x121564e21a05facf50c532821d9c9b91125e54f7e8d689a9f2aaff8662376a48	0x35ff131e1a9f6cec588874e8c134fea1f3ec48f1	0x68b3465833fb72a70ecdf485e0e4c7bd8665fc45	2.38e+17	0x5ae401dc00000000000000000000000000000000000000000000000000000000638ccb97000000000000000000000000000000000000000000000000000000000000004000000000000000000000000000000000000000000000000000000000000000020000000000000000000000000000000000000000000000000000000000000040000000000000000000000000000000000000000000000000000000000000016000000000000000000000000000000000000000000000000000000000000000e442712…	16112650	0x5713cc306bd06ae19e8a3e3848ac6ca093172c6bb29b06498c08da2ddcb1032a
67358	0x0e19dadde03dc9986ef8874f41b097a6f3dbf731bee96912374624fbd3bd0353	0x1f2650c6a9144607e06519d204e524daa3b610f2	0x0443cca4a4a690492246edc3944f9d710ed1e3d8	2.84e+16	0x	16112650	0x5713cc306bd06ae19e8a3e3848ac6ca093172c6bb29b06498c08da2ddcb1032a
67359	0xd06c64c8a5aca855f2e943f16390a78281fc36a1137323a897cf00a91c1c2bca	0xfa6e906dd9084d50be4b0e6ac13ef5b7186362e2	0x76f4eed9fe41262669d0250b2a97db79712ad855	0	0xf17a454600000000000000000000000000000000000000000000000000000000000000c000000000000000000000000000000000000000000000000000000000000001a0000000000000000000000000000000000000000000000309950a5c4874aefb400000000000000000000000000000000000000000000003073fdb7b3cf97416a80000000000000000000000001d64fb0ffa8362b2e1ee7ee03929159551eab26e000000000000000000000000000000000000000000000000000000000000022000000…	16112650	0x5713cc306bd06ae19e8a3e3848ac6ca093172c6bb29b06498c08da2ddcb1032a
67361	0x155322e3bce788f346dae49c91547b54ac1d43daee99e11ba1c309b2622519ba	0x3feea8d80c68f9e08b60bc6f431bd6490e2ca7af	0xa0b86991c6218b36c1d19d4a2e9eb0ce3606eb48	0	0x23b872dd0000000000000000000000003f3dc6e9c359cb35bb9af03b9ea58b432b69f6b2000000000000000000000000680dd67ddb201d2e20c0714e8785fd7bea397f1a0000000000000000000000000000000000000000000000000000000000000000	16112650	0x5713cc306bd06ae19e8a3e3848ac6ca093172c6bb29b06498c08da2ddcb1032a
67362	0x46b11e1e14d06fd7d28fddeb43ecfcf4c3076bb691ff433b93587bf13af63d7d	0x93f635372008b7c5d770aaa6ff313454c8dc498c	0xa69babef1ca67a37ffaf7a485dfff3382056e78c	53510	0x1cff79cd000000000000000000000000a341dcee3e6e1302072fc1fd22a796df3f4ef2c5000000000000000000000000000000000000000000000000000000000000004000000000000000000000000000000000000000000000000000000000000000c4588116d80000000000000000000000000000000000000000000003d2254a0fec8433fc79000000000000000000000000000000000000000ffc7833875cff80000000000000000000000000000000000000000000000000000731f13312c3252269b56…	16112650	0x5713cc306bd06ae19e8a3e3848ac6ca093172c6bb29b06498c08da2ddcb1032a
67365	0xc606fc9f16706d94a162264d02bb943638191e016047dc12d6601ab924f59620	0x079a892628ebf28d0ed8f00151cff225a093dc63	0x4a7d04243ce5ac0f9c5a2058e82ea76c47a56515	4.9e+16	0x	16112650	0x5713cc306bd06ae19e8a3e3848ac6ca093172c6bb29b06498c08da2ddcb1032a
67367	0x58c6335314023468d5a7b523939288c2b83faf6b0478c4e4c9f472a6370012ec	0x079a892628ebf28d0ed8f00151cff225a093dc63	0x2075ec48204baffe4f58f4582ed5df9145073c71	4.25e+17	0x	16112650	0x5713cc306bd06ae19e8a3e3848ac6ca093172c6bb29b06498c08da2ddcb1032a
67368	0x933d4140af7edc6e2de3fbb768a8165ceaee3668444969f4a53299b1c913045c	0x7a2306f66f545294983102c463ac31b572520d7a	0x6b175474e89094c44da98b954eedeac495271d0f	0	0xa9059cbb000000000000000000000000e109008e9a15dc92a793e28fdf42468696535f1b00000000000000000000000000000000000000000000006c6b935b8bbd400000	16112650	0x5713cc306bd06ae19e8a3e3848ac6ca093172c6bb29b06498c08da2ddcb1032a
67369	0x1493a376fec90637cb8b136dca5fdc7072e6c5d0e2cffef23837d20a4b0db78a	0xf89d7b9c864f589bbf53a82105107622b35eaa40	0x7420b4b9a0110cdc71fb720908340c03f9bc03ec	0	0xa9059cbb0000000000000000000000001e693250591318b7a105719c693204c35bd2956e00000000000000000000000000000000000000000000034c7ebf397f822f8000	16112650	0x5713cc306bd06ae19e8a3e3848ac6ca093172c6bb29b06498c08da2ddcb1032a
67371	0x7a55165acd6ed265d1fc846b2ada9e1e92a8ad538a07f600cce09ee6d828178d	0xab97925eb84fe0260779f58b7cb08d77dcb1ee2b	0xd2f9b6e6851a0d2baac956545c842902894580aa	8e+16	0x	16112650	0x5713cc306bd06ae19e8a3e3848ac6ca093172c6bb29b06498c08da2ddcb1032a
67372	0x7c11665ca0d29b9cc007026993b14eb38c2152aa2d8a4c48bbde7d293b0c7451	0x18b33acce1a180e34c422b309528fd95bfc6ffc6	0xc6dca8e9c9eb5a7eb68b04a69e63352d5d98695c	0	0x5b70ea9f	16112650	0x5713cc306bd06ae19e8a3e3848ac6ca093172c6bb29b06498c08da2ddcb1032a
67373	0xd95430a3cff02702d34b9917b4163b1d0974d482b1d9eb1c97e2078dabca1ca8	0x4603180bbb8221157880afaa84638e0fc467738d	0xa69babef1ca67a37ffaf7a485dfff3382056e78c	32518	0x1cff79cd0000000000000000000000002abe3456938f2a5d455348bb36742b0ffb73f092000000000000000000000000000000000000000000000000000000000000004000000000000000000000000000000000000000000000000000000000000000c4588116d800000000000000000000000000000000000000000000000011ba5075d1365036000000000000000000000000000000000000000000043e3f7f199159000000000000000000000000000000000000000000000000124ec02f809ff7af2d3b7…	16112650	0x5713cc306bd06ae19e8a3e3848ac6ca093172c6bb29b06498c08da2ddcb1032a
67375	0xd28fb19ad2b77e5a65e8c517468024d305882cb0649b9cf7064162911829b9e4	0x9be89c60e0daa0abf93cc242758166106095c8a8	0x6c410cf0b8c113dc6a7641b431390b11d5515082	0	0xf8e93ef900000000000000000000000000000000000000000000000000000000000000200000000000000000000000000000000000000000000000000000000000000001000000000000000000000000000000000000000000000000000000000000390d	16112650	0x5713cc306bd06ae19e8a3e3848ac6ca093172c6bb29b06498c08da2ddcb1032a
67376	0x2a96b8544ebefa087207a0138b4afd7d655b8f6995af500331a44e130d0def70	0x0cac3d1a887206e0f6169222c4504301a8b4b993	0xa69babef1ca67a37ffaf7a485dfff3382056e78c	34325	0x1cff79cd00000000000000000000000031ec7d43b2aec8600d6ed6d8ca330d591315151a000000000000000000000000000000000000000000000000000000000000004000000000000000000000000000000000000000000000000000000000000000c41f3cc1fe0000000000000000000000000000000000000000000000000000000cd383886000000000000000000000000000000000000000000000000011917814914950000000000000000000000000000000000000000000000254c80a3c9f1445ea2…	16112650	0x5713cc306bd06ae19e8a3e3848ac6ca093172c6bb29b06498c08da2ddcb1032a
67378	0x1aacf7e48cfc14b9a7045872d52424931011f9ddddc6f0e2c498000d6b79e914	0x3e46576af1027c6a0419f725a499c984922ceb29	0x5a4176cb7a068372631b0482d1d34fefdff7203a	9320000000000000	0x	16112650	0x5713cc306bd06ae19e8a3e3848ac6ca093172c6bb29b06498c08da2ddcb1032a
67380	0x2598bad5ee04fad2c7d0f1a55210dcf582f8342ad5c66883bbde870402ddb67c	0x0124d0fa0dfb1430dfcff16ec6a96945e7a0bc10	0x626c27bcb7739ca923ff1c592dd1efebd4f7c829	0	0xca8bd1f90214010001f4271088e6a0c2ddd26feeb64f039a2c41296fcb3f5640c02aaa39b223fe8d0a0e5c4f27ead9083c756cc21400010bb827108ad599c3a0ff1de082011efddc58f1908eb6e6d8a0b86991c6218b36c1d19d4a2e9eb0ce3606eb48070964168106815509040c64e8d7294b800000000000	16112650	0x5713cc306bd06ae19e8a3e3848ac6ca093172c6bb29b06498c08da2ddcb1032a
67382	0x4c038522501fb6e30cd3cc27c056410a3f766afa8ab5d7d5c29ad3f1b5fd67ce	0x9aab3f81604c683a1a0d14019fbfe15bef7aa1ee	0xa57bd00134b2850b2a1c55860c9e9ea100fdd6cf	50709	0x1cff79cd0000000000000000000000004cf47f6a7a8a85a595d2eba7a5965df85f17b60800000000000000000000000000000000000000000000000000000000000000400000000000000000000000000000000000000000000000000000000000000164ad6080fe000000000000000000000000b4e16d0168e52d35cacd2c6185b44281ec28c9dc000000000000000000000000c02aaa39b223fe8d0a0e5c4f27ead9083c756cc2000000000000000000000000a0b86991c6218b36c1d19d4a2e9eb0ce3606e…	16112650	0x5713cc306bd06ae19e8a3e3848ac6ca093172c6bb29b06498c08da2ddcb1032a
67383	0x7a19cabfa7c65f8077b53d5c3d7d93887aab417651b12875dbb66aab7d973405	0x5e2b6c6b2240d582995537d3fafdb556e4a3822f	0x98c3d3183c4b8a650614ad179a1a98be0a8d6b8e	0	0xce2e62ff00000000000000000000000000000000000000000000000019a94063db4206680000000000000000000000000000000000000000000000000d190104aada3300000000000000000000000000c2adda861f89bbb333c90c492cb837741916a2250000000000000000000000009f8f72aa9304c8b593d555f12ef6589cc3a579a2000000000000000000000000000000000000000000000000000000000000000100000000000000000000000000000000000000000000000000000000638ccb88	16112650	0x5713cc306bd06ae19e8a3e3848ac6ca093172c6bb29b06498c08da2ddcb1032a
67384	0xe4259971bca884d5d231b53f74dd7a90e4f8823f2489600f9dd3ff26d5f808e3	0x6dfc34609a05bc22319fa4cce1d1e2929548c0d7	0x66e3962e85cdce8f6f9c3d46ea376012ce2083c8	694000000000000	0x	16112650	0x5713cc306bd06ae19e8a3e3848ac6ca093172c6bb29b06498c08da2ddcb1032a
67385	0x5a9d2831e9f502afacf39a9e119dd2bc03b6fe7837d7da03d8ebc94dff02bdb3	0x1a1c87d9a6f55d3bbb064bff1059ad37b6bdc097	0xdac17f958d2ee523a2206206994597c13d831ec7	0	0x23b872dd000000000000000000000000adb60332366eeca6d77494cd217705ab427f716c00000000000000000000000095b564f3b3bae3f206aa418667ba000afafacc8a0000000000000000000000000000000000000000000000000000000009bf65e9	16112650	0x5713cc306bd06ae19e8a3e3848ac6ca093172c6bb29b06498c08da2ddcb1032a
67386	0x4baad0a0e401bce3e6c3addeb19791ea9b481f0943be4c7ae161d0761bcc3310	0xa85663462e7cefaaf9b455c19bca07f0c2b6a1f3	0x4ad8d9cf9424b477e77a0d7c339c4de792b92fc6	5e+17	0x	16112650	0x5713cc306bd06ae19e8a3e3848ac6ca093172c6bb29b06498c08da2ddcb1032a
67388	0x3dfd8386ec748dfab253dc7cbb18f33991e04a51024c4437f8606c06467aea5b	0xbdc9b9b03ccf8c3202585d210f6650663e353a78	0x5f1f78566a167456ce6c12f6e23f193b76eb12d4	3900000000000000	0x	16112650	0x5713cc306bd06ae19e8a3e3848ac6ca093172c6bb29b06498c08da2ddcb1032a
67392	0x67c5b820b260d3627369de6fdcbdd836938d0c0a272db350ac53cbf50101ad64	0x3f22f60936f4f5d1e96cedeb44bee66d0cd7c220	0x98c3d3183c4b8a650614ad179a1a98be0a8d6b8e	0	0xce2e62ff00000000000000000000000000000000000000000000002877af96957a03b4b700000000000000000000000000000000000000000000000010668bbb0bcc3a00000000000000000000000000570febdf89c07f256c75686caca215289bb11cfc000000000000000000000000bbc2ae13b23d715c30720f079fcd9b4a74093505000000000000000000000000000000000000000000000000000000000000000100000000000000000000000000000000000000000000000000000000638ccb88	16112650	0x5713cc306bd06ae19e8a3e3848ac6ca093172c6bb29b06498c08da2ddcb1032a
67393	0x9e2d430af05ae21050eb0ff4016254d939c5975e4111637430ed1fa4ca785461	0x431b5a84acc1297eda88259f300262f1bc3a74f3	0xa57bd00134b2850b2a1c55860c9e9ea100fdd6cf	52998	0x1cff79cd0000000000000000000000004cf47f6a7a8a85a595d2eba7a5965df85f17b60800000000000000000000000000000000000000000000000000000000000000400000000000000000000000000000000000000000000000000000000000000164ad6080fe000000000000000000000000a478c2975ab1ea89e8196811f51a7b7ade33eb11000000000000000000000000c02aaa39b223fe8d0a0e5c4f27ead9083c756cc20000000000000000000000006b175474e89094c44da98b954eedeac495271…	16112650	0x5713cc306bd06ae19e8a3e3848ac6ca093172c6bb29b06498c08da2ddcb1032a
67395	0x43a901f53da3b8d61096e7acd158f9a7c2e24f94cf4d33a87184f938837a3c95	0xfbb1b73c4f0bda4f67dca266ce6ef42f520fbb98	0x86ed939b500e121c0c5f493f399084db596dad20	0	0xa9059cbb000000000000000000000000a69dc3d2ba5e0e23b652c0dc383f9b57f49013a7000000000000000000000000000000000000000000000b3b7a2a8be47879bc00	16112650	0x5713cc306bd06ae19e8a3e3848ac6ca093172c6bb29b06498c08da2ddcb1032a
67397	0xfeffb80de4703a532d1b48b77965e4e417d54306f2542d79544c7f3f0f41568a	0x9f59f787122a5df035866591a4c78f911288f8e4	0x881d40237659c251811cec9c364ef91dc08d300c	0	0x5f5755290000000000000000000000000000000000000000000000000000000000000080000000000000000000000000a0b86991c6218b36c1d19d4a2e9eb0ce3606eb480000000000000000000000000000000000000000000000000000000001312d0000000000000000000000000000000000000000000000000000000000000000c00000000000000000000000000000000000000000000000000000000000000017616972737761704c696768743346656544796e616d696300000000000000000000000…	16112650	0x5713cc306bd06ae19e8a3e3848ac6ca093172c6bb29b06498c08da2ddcb1032a
67403	0x0c94c4523566acf85ee4ab11f98891170e01538d9f594a510f1cb4ce72c76dc3	0x3ab8f8fa7f60cac88e1408a8eb5915edc5815af3	0x617dee16b86534a5d792a4d7a62fb491b544111e	0	0xabcffc260000000000000000000000004fe5b965e3bd76eff36280471030ef9b0e6e2c1d000000000000000000000000000000000000000000000000000000000000008000000000000000000000000000000000000000000000000000000000000002800000000000000000000000000000000000000000000000000000000000000840000000000000000000000000dac17f958d2ee523a2206206994597c13d831ec7000000000000000000000000172401c05a6f9d569d731f747d3bfd66b1c68e5400000…	16112649	0xc546c61021bd50f2c426973694cd2bb1f1f5bb8db69612fc51b3472d9cec49c4
67404	0xb35b67ad1866ff573a020a8f33b3d8d8c8eaeb8bab26b60af85ca25ff7178460	0xc105afc5cd421462dbf7e05d011ca53c08edc43a	0x04fa0d235c4abf4bcf4787af4cf447de572ef828	0	0xa9059cbb00000000000000000000000028c6c06298d514db089934071355e5743bf21d600000000000000000000000000000000000000000000003a14509e1caa2180000	16112649	0xc546c61021bd50f2c426973694cd2bb1f1f5bb8db69612fc51b3472d9cec49c4
67405	0x1de0e928bcfd25deb9097a56c245a9dad37fd4488626c5b82c52fe99083543cd	0x29984d1f9055cafb02dcdd53c54b727902e44975	0x0bc529c00c6401aef6d220be8c6ea1667f6ad93e	0	0xa9059cbb00000000000000000000000028c6c06298d514db089934071355e5743bf21d6000000000000000000000000000000000000000000000000009fdf42f6e480000	16112649	0xc546c61021bd50f2c426973694cd2bb1f1f5bb8db69612fc51b3472d9cec49c4
67407	0x99e425e5dfb395268e409739231269230bd021c0fb0c56f02a3a2a507fae10e5	0x8beafd60c3ecd32747a1c04067233a00b6d69236	0xdac17f958d2ee523a2206206994597c13d831ec7	0	0xa9059cbb00000000000000000000000028c6c06298d514db089934071355e5743bf21d600000000000000000000000000000000000000000000000000000000c4a6051be	16112649	0xc546c61021bd50f2c426973694cd2bb1f1f5bb8db69612fc51b3472d9cec49c4
67409	0x9caff09ed8d995f3c92ab2952f90ee55e8bd0edd01c463e4f96357192d72fd47	0xafa81abfc55b14d9fb18ed59aded39f532f4e312	0x76f4eed9fe41262669d0250b2a97db79712ad855	0	0xf17a454600000000000000000000000000000000000000000000000000000000000000c000000000000000000000000000000000000000000000000000000000000001a000000000000000000000000000000000000000000000000000000002dd303def00000000000000000000000000000000000000000000000000000002d5db478e0000000000000000000000001d64fb0ffa8362b2e1ee7ee03929159551eab26e000000000000000000000000000000000000000000000000000000000000022000000…	16112649	0xc546c61021bd50f2c426973694cd2bb1f1f5bb8db69612fc51b3472d9cec49c4
67411	0xecb5cca93976bb09aca16809b47bc0633e33347ac5d13ef2945d198199ad3cbf	0xdb2f6754952729ca57b958bb16237ec187e6e0e5	0x14a47885db4aee4b83d13e281b2013a18aa75ff4	0	0x095ea7b3000000000000000000000000617dee16b86534a5d792a4d7a62fb491b544111effffffffffffffffffffffffffffffffffffffffffffffffffffffffffffffff	16112649	0xc546c61021bd50f2c426973694cd2bb1f1f5bb8db69612fc51b3472d9cec49c4
67412	0xeeea1aaa12dd6c11bbedb3b2e3f230079c38ae9cfbef6177ce134a01f3bb0d0a	0x56eddb7aa87536c09ccc2793473599fd21a8b17f	0xdac17f958d2ee523a2206206994597c13d831ec7	0	0xa9059cbb000000000000000000000000814912f46c5acc9f8543714bd737c6cdaab9ada70000000000000000000000000000000000000000000000000000000003813780	16112649	0xc546c61021bd50f2c426973694cd2bb1f1f5bb8db69612fc51b3472d9cec49c4
67413	0x43c7cf5345c1a0024c1e92f4178c3363117616a588ae918c90f7c3db2c16b182	0x56eddb7aa87536c09ccc2793473599fd21a8b17f	0xe8e83f3ae4ddfcf63b3b91f6df9d76b4fa8c786c	8.87e+16	0x	16112649	0xc546c61021bd50f2c426973694cd2bb1f1f5bb8db69612fc51b3472d9cec49c4
67414	0xa8dcca1626a98862e5c45c31ab1281b6232f187b6f001d51ea83cfbac290689b	0xa9831d89c4067bf7518efbcb6351ef6dd0059f33	0xdac17f958d2ee523a2206206994597c13d831ec7	0	0x23b872dd00000000000000000000000085e0fdad4c8f3e70866df6dca18f4ecac712fab40000000000000000000000009c838e6d56801ac164d84971c38d97f0b1a81f610000000000000000000000000000000000000000000000000000000000000000	16112649	0xc546c61021bd50f2c426973694cd2bb1f1f5bb8db69612fc51b3472d9cec49c4
67415	0x2675bc9a69a4a7f4c1803ae815b322976b5fd039057252a093f53061a689e4fd	0xff55502a4a04fb6fc960b8e3cabed261bcacbb9d	0xcb56a237b27ce9646604eb3bfd8a80033c2edc09	2060000000000000	0x	16112649	0xc546c61021bd50f2c426973694cd2bb1f1f5bb8db69612fc51b3472d9cec49c4
67417	0xe7ee3bbd045674929192d57d0af1a9a0a75c8cafa2e31190844a088aba813744	0xe6a747d4ecae6c0cc5aba76d04c19a49ce038af2	0x513ef3f0d5259a0819370459a86930d047bf8e9d	0	0x6a76120200000000000000000000000060eb332bd4a0e2a9eeb3212cfdd6ef03ce4cb3b50000000000000000000000000000000000000000000000000000000000000000000000000000000000000000000000000000000000000000000000000000014000000000000000000000000000000000000000000000000000000000000000000000000000000000000000000000000000000000000000000000000000000000000000000000000000000000000000000000000000000000000000000000000000000…	16112649	0xc546c61021bd50f2c426973694cd2bb1f1f5bb8db69612fc51b3472d9cec49c4
67418	0x56f1b3d49e885d492e4feb33a0fdc850f0742c1ac146a1ca2bf029b309919e41	0x8aa28b73a5ea7a7a1446ee51806fc70474615185	0xb99e4e9b8fd99c2c90ad5382dbc6adfdfe3a33f3	0	0xa22cb4650000000000000000000000001e0049783f008a0085193e00003d00cd54003c710000000000000000000000000000000000000000000000000000000000000000	16112649	0xc546c61021bd50f2c426973694cd2bb1f1f5bb8db69612fc51b3472d9cec49c4
67420	0x9c1e10184b2aea4765f228f5809bcc78a0868301dd295eb7374a1c21fd23cc7e	0xd1264edb9a06548e22b8301df460c6ec4dc70a8d	0xf704f5b58c4998dc51ca254afc9d297db18c5e28	0	0x095ea7b30000000000000000000000001111111254eeb25477b68fb85ed929f73a960582ffffffffffffffffffffffffffffffffffffffffffffffffffffffffffffffff	16112649	0xc546c61021bd50f2c426973694cd2bb1f1f5bb8db69612fc51b3472d9cec49c4
67421	0xbb75d6e8b5a1f8768abf0dcbbd29a5e83d396c735d6d1b69dbdd89c3d814177f	0xa9831d89c4067bf7518efbcb6351ef6dd0059f33	0xdac17f958d2ee523a2206206994597c13d831ec7	0	0x23b872dd0000000000000000000000007e6954895cdfb5beebf20b13c66f2f13aa3ee1b00000000000000000000000005fd3b9209696b460c48e050b1a5b268f8f8eb9820000000000000000000000000000000000000000000000000000000000000000	16112649	0xc546c61021bd50f2c426973694cd2bb1f1f5bb8db69612fc51b3472d9cec49c4
67422	0x0dc7e87f84278db0892d1c1ae4d67734152235d0fce2343f97e21c92fe04909b	0xa3f30eb8788d65d457d8dcb0e8c49010ccdcb825	0xdac17f958d2ee523a2206206994597c13d831ec7	0	0xa9059cbb000000000000000000000000ec3110c7a818c46dccf91d33773491e415a3c04a0000000000000000000000000000000000000000000000000000000011e1a300	16112649	0xc546c61021bd50f2c426973694cd2bb1f1f5bb8db69612fc51b3472d9cec49c4
67423	0xd8b4923d433542c09498dafb8f8f9591c826f5796d7f25a0b0af8ee8c61dcb74	0x3a0bc42e3bed28bccd59b3a9ac91aa3a6772b99d	0x086b656140b30f53fe886023e971a4a5beffe54f	0	0x65f8c6c50000000000000000000000000000000000000000000000000000000000000000	16112649	0xc546c61021bd50f2c426973694cd2bb1f1f5bb8db69612fc51b3472d9cec49c4
67425	0xd08261b857fb826adc47f86776f7ac86fe785ab2da00a6c5cbd216fb3941f6f0	0x4a465c6db61c0055469a891d5baf7a4dd1c7ae15	0xb89fe5a72b3a71e585f468c3ff2d1f67df13b256	0	0xa22cb465000000000000000000000000f849de01b080adc3a814fabe1e2087475cf2e3540000000000000000000000000000000000000000000000000000000000000001	16112649	0xc546c61021bd50f2c426973694cd2bb1f1f5bb8db69612fc51b3472d9cec49c4
67426	0xdb54390e1fd320bba18255e4d34727e8d5316f79f12ff5277b55ad13e3d78dac	0x4440dd7d0ee16f95e3325a9748587b447961fade	0xf041c6b49e7ebd99516a25359b978ef2ee75810f	0	0x66ca9b8300000000000000000000000000000000000000000000000000000000000000050000000000000000000000000000000000000000000000000000000000000050	16112649	0xc546c61021bd50f2c426973694cd2bb1f1f5bb8db69612fc51b3472d9cec49c4
67427	0xb660f63773b8264849aa401c57f07d5989da52695ae8bd6d44195248daa5e778	0x5639e650309231be44ca40245506037324491d42	0xdac17f958d2ee523a2206206994597c13d831ec7	0	0xa9059cbb000000000000000000000000108663fe4fba61633d8cee0219799a202faac1830000000000000000000000000000000000000000000000000000000005449788	16112649	0xc546c61021bd50f2c426973694cd2bb1f1f5bb8db69612fc51b3472d9cec49c4
67428	0xcac78351d13204cf7ae8b8876035da44b1eb9ba6655ab7544fe0ee2c96614b1b	0xe53e05f1274bdbc305d5f9d85b95861d250f12bc	0xb753428af26e81097e7fd17f40c88aaa3e04902c	0	0x095ea7b300000000000000000000000068b3465833fb72a70ecdf485e0e4c7bd8665fc45ffffffffffffffffffffffffffffffffffffffffffffffffffffffffffffffff	16112649	0xc546c61021bd50f2c426973694cd2bb1f1f5bb8db69612fc51b3472d9cec49c4
67429	0x3f12ba4479265ea2c5512e1e18d3e8c926ac4cd8f9eb7666f67a685635afbe22	0x8695484d8842036fca74e3b52d5eddae0b6da679	0x0e4e58701be47cf4ed9a655777dcde803a017c2d	0	0x42842e0e0000000000000000000000008695484d8842036fca74e3b52d5eddae0b6da679000000000000000000000000a88125fdd9b6b8bdad9449861b9b79db9feab8650000000000000000000000000000000000000000000000000000000000000319360c6ebe	16112649	0xc546c61021bd50f2c426973694cd2bb1f1f5bb8db69612fc51b3472d9cec49c4
67430	0x3566e1cd47bfc81be500b5f0a02a2c985e15a536f123963f599cda0a3c231753	0x80c67432656d59144ceff962e8faf8926599bcf8	0xdb287da2048c602356601c0ce589e17709987f7f	3.2e+18	0x	16112649	0xc546c61021bd50f2c426973694cd2bb1f1f5bb8db69612fc51b3472d9cec49c4
67431	0x207a07153bf2fb277b61b4c38d3d0f30cc26a5c6accd984c8ef24b0cb6c023ae	0x8f256ff6e6d549ad79d7c90afdd790489721c19e	0x1111111254eeb25477b68fb85ed929f73a960582	0	0x0502b1c50000000000000000000000005c75c702e7c08a05e9d49cab78fc5e28b6c5c55a000000000000000000000000000000000000000000aa80fd07c71b8332489ad8000000000000000000000000000000000000000000000000011e0a9cedef0ffa0000000000000000000000000000000000000000000000000000000000000080000000000000000000000000000000000000000000000000000000000000000140000000000000003b6d0340db43d5eaa956a6754ff7d738fa4bafc45067ee23e26b9…	16112649	0xc546c61021bd50f2c426973694cd2bb1f1f5bb8db69612fc51b3472d9cec49c4
67432	0xc0cf67fa03152eb4b236788ff399343fc17c3d1d73c7e76476113a9338aaaa21	0x25a149fe3d5d4f49a43ef29b27e76291bf93365d	0x00000000006c3852cbef3e08e8df289169ede581	1.3e+16	0xed98a57400000000000000000000000000000000000000000000000000000000000000a000000000000000000000000000000000000000000000000000000000000010a000000000000000000000000000000000000000000000000000000000000012400000007b02230091a7ed01230072f7006a004d60a8d4e71d599b8104250f00000000000000000000000000000000000000000000000000000000000000000003000000000000000000000000000000000000000000000000000000000000000300000…	16112649	0xc546c61021bd50f2c426973694cd2bb1f1f5bb8db69612fc51b3472d9cec49c4
67433	0x044972a261d6886793da558a525c3ca0c075a20d49ee0e28b43c35f2e6567abc	0xf7a797b5f6d530cac3861c1f9c54b521edc054f1	0xdac17f958d2ee523a2206206994597c13d831ec7	0	0x095ea7b300000000000000000000000068b3465833fb72a70ecdf485e0e4c7bd8665fc45ffffffffffffffffffffffffffffffffffffffffffffffffffffffffffffffff	16112649	0xc546c61021bd50f2c426973694cd2bb1f1f5bb8db69612fc51b3472d9cec49c4
67434	0x8d1f595bc369aafc50f8128d0003907599a54f594c147f4e466df703e940d9b5	0x924b2cc11f9faacfbea55075e2c3c7d15870f5f5	0xd9f6724f250f4da8453e3dd97d718872bf72c1da	0	0x095ea7b300000000000000000000000068b3465833fb72a70ecdf485e0e4c7bd8665fc45ffffffffffffffffffffffffffffffffffffffffffffffffffffffffffffffff	16112649	0xc546c61021bd50f2c426973694cd2bb1f1f5bb8db69612fc51b3472d9cec49c4
67437	0x8a0cedbc7ab2445d7bab68789fac1bc465a9aed3d907c3d98d09d60482091037	0x20950b94649930d8fbbd5058cdbf53ca8c3868d2	0x4523b0024168b7af7271ecced627974b0e6beec9	6640000000000000	0x	16112649	0xc546c61021bd50f2c426973694cd2bb1f1f5bb8db69612fc51b3472d9cec49c4
67438	0xf3df2b1d24e7109076332ede1067d0b0a219f10f59cd8222b5a0bd92642cc79f	0x29984d1f9055cafb02dcdd53c54b727902e44975	0xa1d0e215a23d7030842fc67ce582a6afa3ccab83	0	0xa9059cbb00000000000000000000000028c6c06298d514db089934071355e5743bf21d60000000000000000000000000000000000000000000000005b386e5c913d50000	16112649	0xc546c61021bd50f2c426973694cd2bb1f1f5bb8db69612fc51b3472d9cec49c4
67440	0x056f989a46d5afc36bc089c39629deb969d4a977cf11a9f06aca533715f2b205	0xa9831d89c4067bf7518efbcb6351ef6dd0059f33	0xdac17f958d2ee523a2206206994597c13d831ec7	0	0x23b872dd0000000000000000000000004b1456931d7b49c947d265da9f066df594da82990000000000000000000000003f114545b43c1781352f1a1f5f147dbcc01b959f0000000000000000000000000000000000000000000000000000000000000000	16112649	0xc546c61021bd50f2c426973694cd2bb1f1f5bb8db69612fc51b3472d9cec49c4
67441	0x10886fa1203b6359e028cfe10921647afea98591b66c1a2a42d91d45e580b87f	0x6ac5755992f781674853e49c6846bebb89afcbc7	0xf6a94dfd0e6ea9ddfdffe4762ad4236576136613	0	0xf02109290000000000000000000000000000000000000000000000000000000000000020000000000000000000000000545bb409cf9d9e5ab7d888658cbc8bd8b926d66700000000000000000000000000000000000000000000000000000000000000000000000000000000000000006ac5755992f781674853e49c6846bebb89afcbc70000000000000000000000006ac5755992f781674853e49c6846bebb89afcbc7000000000000000000000000a0b86991c6218b36c1d19d4a2e9eb0ce3606eb4800000…	16112649	0xc546c61021bd50f2c426973694cd2bb1f1f5bb8db69612fc51b3472d9cec49c4
67445	0xbde7f91f5cbd615b2102851103edf1b7d640d4ecafd1a92954b2628263121590	0x974caa59e49682cda0ad2bbe82983419a2ecc400	0x2f27e89e77c2011222e1179b668f984d6009ab52	3.07e+17	0x	16112649	0xc546c61021bd50f2c426973694cd2bb1f1f5bb8db69612fc51b3472d9cec49c4
67446	0xbfb523548d579bf3addf1d3423602ad79d21051a75d3ca327b39c18d329571aa	0x556ba5cd1ef5025fabd76b0f61b2c419f6c2f312	0xa0b86991c6218b36c1d19d4a2e9eb0ce3606eb48	0	0xa9059cbb00000000000000000000000028c6c06298d514db089934071355e5743bf21d6000000000000000000000000000000000000000000000000000000000938580c0	16112649	0xc546c61021bd50f2c426973694cd2bb1f1f5bb8db69612fc51b3472d9cec49c4
67447	0x664f8893081f9a96228e96c22ec6f21a6155d794174f16447a68bdccc2e7be41	0x0470c0f69cc18cbe3d9cf0a8113b3967567dbecb	0xc6dca8e9c9eb5a7eb68b04a69e63352d5d98695c	0	0xa22cb4650000000000000000000000001e0049783f008a0085193e00003d00cd54003c710000000000000000000000000000000000000000000000000000000000000001	16112649	0xc546c61021bd50f2c426973694cd2bb1f1f5bb8db69612fc51b3472d9cec49c4
67448	0xc28d7aeac0943f9ad4d526199633226a835ccaf870d5798237f55471bd20eaa8	0x867bfa133d64fad734c89f886d2a169b6504ab2b	0xd71d0416d92101d908917815773e01e619679abc	4e+18	0x	16112649	0xc546c61021bd50f2c426973694cd2bb1f1f5bb8db69612fc51b3472d9cec49c4
67449	0xa6c5fb4a060f3916f8c3ed9d78ff072013b6aad2d265bc852a80c4d7ebd19e1c	0x39f6a6c85d39d5abad8a398310c52e7c374f2ba3	0x00ea65422d7d3f9760fcf2cc265f508ebbcf534a	1.33e+19	0x	16112649	0xc546c61021bd50f2c426973694cd2bb1f1f5bb8db69612fc51b3472d9cec49c4
67450	0xc369a9786547670854e18d8fcf3bc883c3badfc21da5d73100cefab6d05b7ca7	0x183c5a0177a4fccabdc942b4fde184a360b7f49a	0x06450dee7fd2fb8e39061434babcfc05599a6fb8	0	0x9ff054df0000000000000000000000000000000000000000000000000000000000000032	16112649	0xc546c61021bd50f2c426973694cd2bb1f1f5bb8db69612fc51b3472d9cec49c4
67451	0x12b657daa0592ac69cc2848239a019251058bd3a21a954bdd3737f0bafaa56cc	0x747cd2e8beef7f09a89d73133aaac16e5916b4f7	0x7a250d5630b4cf539739df2c5dacb4c659f2488d	1e+17	0xb6f9de95000000000000000000000000000000000000000000000000000000000000000000000000000000000000000000000000000000000000000000000000000000800000000000000000000000007a97e85792c47df11a11862698940dc9ca18131900000000000000000000000000000000000000000000000000000000638cd9250000000000000000000000000000000000000000000000000000000000000002000000000000000000000000c02aaa39b223fe8d0a0e5c4f27ead9083c756cc200000…	16112649	0xc546c61021bd50f2c426973694cd2bb1f1f5bb8db69612fc51b3472d9cec49c4
67452	0x3e7e19297913ea8073d8d702406252d693e52490c41e27cd74ff9bd55c224b14	0xf11b44abb718d7e2bd71268c6758815f627c9d45	0x68b3465833fb72a70ecdf485e0e4c7bd8665fc45	0	0x5ae401dc00000000000000000000000000000000000000000000000000000000638ccd6b000000000000000000000000000000000000000000000000000000000000004000000000000000000000000000000000000000000000000000000000000000020000000000000000000000000000000000000000000000000000000000000040000000000000000000000000000000000000000000000000000000000000016000000000000000000000000000000000000000000000000000000000000000e4472b4…	16112649	0xc546c61021bd50f2c426973694cd2bb1f1f5bb8db69612fc51b3472d9cec49c4
67453	0xfb5695a22857400d164c78e6fac5945a5a132cf597510b6ac7568ef993d31aac	0x0f87cc84e875d296fd3d0ff922b740a29ed66747	0x7a250d5630b4cf539739df2c5dacb4c659f2488d	0	0x791ac94700000000000000000000000000000000000000000005083f50d738f194e0000000000000000000000000000000000000000000000000000000c43848ba4c180700000000000000000000000000000000000000000000000000000000000000a00000000000000000000000000f87cc84e875d296fd3d0ff922b740a29ed6674700000000000000000000000000000000000000000000000000000000638ccbac000000000000000000000000000000000000000000000000000000000000000200000…	16112649	0xc546c61021bd50f2c426973694cd2bb1f1f5bb8db69612fc51b3472d9cec49c4
67454	0xefa1be1f27257ba552a5a059aa9c0e70c648dc6e1317b34d7f99eaf804ab8a7c	0x463d200acb7e92af8e891be3c338157225232528	0x00000000006c3852cbef3e08e8df289169ede581	1.29e+17	0xfb0f3ee100000000000000000000000000000000000000000000000000000000000000200000000000000000000000000000000000000000000000000000000000000000000000000000000000000000000000000000000000000000000000000000000000000000000000000000000000000000000000000000000001a7ed748dd2d00000000000000000000000000040df5c0e9bf6c2ac0ba2fbeed6035dfe92d7bfe3000000000000000000000000004c00500000ad104d7dbd00e3ae0a5c00560c0000000…	16112649	0xc546c61021bd50f2c426973694cd2bb1f1f5bb8db69612fc51b3472d9cec49c4
67455	0x4eb32589d5f7cfe4f43e3d561b37cb616d10f39076edb329af3694e15b76ae15	0xbe387bdf287589a82d8811aed96b9c322529cfe0	0x7492e30d60d96c58ed0f0dc2fe536098c620c4c0	0	0xefef39a10000000000000000000000000000000000000000000000000000000000000001	16112649	0xc546c61021bd50f2c426973694cd2bb1f1f5bb8db69612fc51b3472d9cec49c4
67456	0xcdd2cd1a38394edc5b4bdef3493d2e70ff88028457c0864389894905619747d7	0x9afacff5c0cc98c5a3d8771cc7230b42ddd42c04	0xc02aaa39b223fe8d0a0e5c4f27ead9083c756cc2	0	0x2e1a7d4d0000000000000000000000000000000000000000000000000ae7df7191b424dc	16112649	0xc546c61021bd50f2c426973694cd2bb1f1f5bb8db69612fc51b3472d9cec49c4
67457	0x1755c82ddeb840415ff0b30addc8f779b3b8fdc83503b28efeaca390aaf3741c	0xcaec9a76e9abd183c6c9e6f2cbf6d3cbdffadae4	0xc02aaa39b223fe8d0a0e5c4f27ead9083c756cc2	0	0x2e1a7d4d000000000000000000000000000000000000000000000000045f8187c8f874a8	16112649	0xc546c61021bd50f2c426973694cd2bb1f1f5bb8db69612fc51b3472d9cec49c4
67458	0x8c9f057920dc198fced605e1379ad8c574b6ee1c1a8f57913790cb8a8254661a	0x21a31ee1afc51d94c2efccaa2092ad1028285549	0xa2afbedf7e5c8bf94ee7a4f7912359104c186881	7.43e+16	0x	16112649	0xc546c61021bd50f2c426973694cd2bb1f1f5bb8db69612fc51b3472d9cec49c4
67459	0xf4b3d3e3baa9880b6c3f246ae38d66e708c251ca7c73246db1aafceb3b721fb3	0xc86a944e0526894a1a1f8ac01a80fc9a54bf5042	0x31c8eacbffdd875c74b94b077895bd78cf1e64a3	0	0xa9059cbb00000000000000000000000028c6c06298d514db089934071355e5743bf21d6000000000000000000000000000000000000000000000065c2c6afc6625ba0000	16112649	0xc546c61021bd50f2c426973694cd2bb1f1f5bb8db69612fc51b3472d9cec49c4
67461	0x16ce9e73235b785c2696448e6437d6ab381c6fe132cd5458f84cd8044fcb7135	0x9430801ebaf509ad49202aabc5f5bc6fd8a3daf8	0x7385e523595a7b564fc9de6630b0311242a097d9	2e+16	0x	16112649	0xc546c61021bd50f2c426973694cd2bb1f1f5bb8db69612fc51b3472d9cec49c4
67462	0x5f88d42905dfe3ffc8dd3e61cdf282bd413a7f8a6c80eda5063f68013bf12441	0xa2d6c9278eb6383d28bf319fe0248446e9ea9132	0xdac17f958d2ee523a2206206994597c13d831ec7	0	0xa9059cbb000000000000000000000000ba12be6d1171273e6cd8f93d821375b173579ef800000000000000000000000000000000000000000000000000000000008893d5	16112649	0xc546c61021bd50f2c426973694cd2bb1f1f5bb8db69612fc51b3472d9cec49c4
67463	0x5d6b90fed572c31f4ee9e165346a42024ac4f75e59802748de0fd25eb29dce7d	0x881e45c2461ff3cdddeed76487ca61f714827738	0x4dbd4fc535ac27206064b68ffcf827b0a60bab3f	4.8e+16	0x439370b1	16112649	0xc546c61021bd50f2c426973694cd2bb1f1f5bb8db69612fc51b3472d9cec49c4
67464	0x3093f63ae52640e34ace35d547670fdcfd8a012a670dbfb54e563bccf8aafb85	0xc7c5eb14fa2c66861a95eadb731122cbff83ff96	0xbc4e8115e17d96cfd8e3ecef2b0d6e19d00f70b2	0	0xa22cb46500000000000000000000000000000000000111abe46ff893f3b2fdf1f759a8a80000000000000000000000000000000000000000000000000000000000000001	16112649	0xc546c61021bd50f2c426973694cd2bb1f1f5bb8db69612fc51b3472d9cec49c4
67465	0x554830b6dc75b6ddce345fcb06fc33ffe37f27739b109028eceaaf522cf6f0da	0x1eed87a079fe38f0883209f27fcbe5ae09310062	0xc5e9ddebb09cd64dfacab4011a0d5cedaf7c9bdb	1.25e+17	0x4690d55a000000000000000000000000000000000000000000000000000000000000004000000000000000000000000000000000000000000000000000000000000000c000000000000000000000000000000000000000000000000000000000000000462f697066732f516d5776314d5757716548423638624c3641333876464b5168794755416d54715562784b727762713361596a4e732f726567697374726174696f6e2e6a736f6e000000000000000000000000000000000000000000000000000000000…	16112649	0xc546c61021bd50f2c426973694cd2bb1f1f5bb8db69612fc51b3472d9cec49c4
67468	0x039015f9a14c2891dfdf49f1cdf12e4a3648e7fba2de25338c9b3bbdd3267f2d	0xb7707b8e88241e77064725099113896bed5c3ed0	0x39da41747a83aee658334415666f3ef92dd0d541	3.27e+16	0x9a2b8115000000000000000000000000000000000000000000000000000000000000002000000000000000000000000000000000000000000000000000000000000000010000000000000000000000000000000000000000000000000000000000000020000000000000000000000000000000000000000000000000000000000000000400000000000000000000000000000000000000000000000000744d37f35e0000000000000000000000000000000000000000000000000000000000000000006000000…	16112649	0xc546c61021bd50f2c426973694cd2bb1f1f5bb8db69612fc51b3472d9cec49c4
67469	0xea4fa4373cdab8af0999a70e042f2f96a1908115efdfb804e91fe07ae2df68fe	0x8c4334952ff5d490a9dce7cfd58b82f6ea0af6d4	0x3ab16af1315dc6c95f83cbf522fecf98d00fd9ba	0	0x853828b6	16112649	0xc546c61021bd50f2c426973694cd2bb1f1f5bb8db69612fc51b3472d9cec49c4
67470	0x9e3ad1d7ad87665b351f2306d843dd3a536666f877cbf1c001553341b9cc517e	0x473300df21d047806a082244b417f96b32f13a33	0xbe5dab4a2e9cd0f27300db4ab94bee3a233aeb19	0	0x8ca5cbb900000000000000000000000000000000000000000000000000000000000000400000000000000000000000000000000000000000000000000000000002b417d400000000000000000000000000000000000000000000000000000000000003cb77aa14fc545d50f1fe44913ab02dec0693ccdeafba4245ec9a9a04a8ab1e20051436a7fe4803af41fcd5bfc0b289523f248083377768447cf67023524a9289306b0fb400d544b1421ecd8f5cbd700fdf57b9de648a1a3271607aa08ed5b4ea46d0c1a…
67471	0x6e2acdda6a5f6327744099b2ebb8bb6565898d2ba3f3d5eff0ab0d22b6fa865f	0xcdd37ada79f589c15bd4f8fd2083dc88e34a2af2	0x3f014ac3a47c11734141715beef097ba6ee4f268	0	0x79c76e1a000000000000000000000000a0b86991c6218b36c1d19d4a2e9eb0ce3606eb48	16112649	0xc546c61021bd50f2c426973694cd2bb1f1f5bb8db69612fc51b3472d9cec49c4
67472	0x9a2256d6c0ded1b467db41327b4de0ea7f65104c9e86cd5805ee8de71068375e	0x1c727a55ea3c11b0ab7d3a361fe0f3c47ce6de5d	0xf86f1959643d1bebb045994ce004fa0d8fc92ab3	7410000000000000	0x	16112649	0xc546c61021bd50f2c426973694cd2bb1f1f5bb8db69612fc51b3472d9cec49c4
67473	0x33d8062261a57c4143b9c58113b9fa4ceaa262d68dfc5a783754107ef736a2f4	0x2cb2e8ef96e367d685d8114c180308c046b90b34	0x3f457ead446a52db61801803338c3dcdc68c712f	5000000000000000	0x	16112649	0xc546c61021bd50f2c426973694cd2bb1f1f5bb8db69612fc51b3472d9cec49c4
67475	0x82cb8e92273ecc440068c2051ea377332496427c509410ced6fbc11180924e69	0x2db1d8cdf1abe8c70b531a790cdf2ff38aecf652	0xdcbfee2a3c9258f57ad5551e9e865c9fc8480bb6	1.55e+17	0x	16112649	0xc546c61021bd50f2c426973694cd2bb1f1f5bb8db69612fc51b3472d9cec49c4
67476	0x736b6c044203fc5bd65b7947d8854ae428317000e8d1615555f5dd78b104e2f5	0x5e2b6c6b2240d582995537d3fafdb556e4a3822f	0x98c3d3183c4b8a650614ad179a1a98be0a8d6b8e	0	0x49c36c07000000000000000000000000e3fe800b0de664bf0bca8ad58ecbc73b259047b000000000000000000000000000000000000000000000000000000001d553dc6f0000000000000000000000000000000000002acb9b82a86626000000000000000000000000000000000000000000000000002abe33eb034502000000000000000000000000000000000000000000000000000000000000000000000000000001	16112649	0xc546c61021bd50f2c426973694cd2bb1f1f5bb8db69612fc51b3472d9cec49c4
67477	0x7166f214c9234aa167d928b24c6e752faf109777d827f3f6a375e2d2d8ccbb10	0x73270a15c25bf6f5832f9fd41f9fea9a7915310e	0x0773edc0438b2ef18fc535b21d0ac77912c308c0	0	0xdd4931537834f4bc31f41dba46b327bc86d944fc35639098512f7eec6e7e34a00b3fcef2e1ad12f5cd7a88481c1c4e1a6102cfd7cb9539bb1405e90210252bbe1c638ccb520230d12b8b4d224452801aced8b2f0aebe155379bb5d5943810a28a894d4c02aaa39b223fe8d0a0e5c4f27ead9083c756cc233010028a894d4ac4b3dacb91461209ae9d41ec517c2b9cb1b7daf	16112649	0xc546c61021bd50f2c426973694cd2bb1f1f5bb8db69612fc51b3472d9cec49c4
67478	0x8bb7cd4984710f422e1a2494339f12813909fb531f25963b3826de2da71b8dd8	0xcf75e88b653c9e57604ffacdfae32089987e76ef	0xc6dca8e9c9eb5a7eb68b04a69e63352d5d98695c	0	0xf242432a000000000000000000000000cf75e88b653c9e57604ffacdfae32089987e76ef0000000000000000000000000b6bd3824df70132d1d1ab77a2b5187fee84e2cf0000000000000000000000000000000000000000000000000000000000004316000000000000000000000000000000000000000000000000000000000000000100000000000000000000000000000000000000000000000000000000000000a0000000000000000000000000000000000000000000000000000000000000000000000…	16112649	0xc546c61021bd50f2c426973694cd2bb1f1f5bb8db69612fc51b3472d9cec49c4
67479	0x60e4b919e9d1f6994b4c09590cc710279f02dcc73580fb492b80ac3b64924691	0x3a95ead303a1b545e3d7a38fb7cb3a7944b8bebd	0xdac17f958d2ee523a2206206994597c13d831ec7	0	0xa9059cbb0000000000000000000000000112d3020673ef7920061c8923d884e69fbf910100000000000000000000000000000000000000000000000000000002363e7f00	16112649	0xc546c61021bd50f2c426973694cd2bb1f1f5bb8db69612fc51b3472d9cec49c4
67480	0x2b2f4f88add0a55d5bc69cb27eee79591a231789f8ed540a362ad9fd63f71c3a	0xdcdb84e268710d6977cdf559aa77e7aecfc4dab1	0x68b3465833fb72a70ecdf485e0e4c7bd8665fc45	2.5e+16	0x5ae401dc00000000000000000000000000000000000000000000000000000000638cd22700000000000000000000000000000000000000000000000000000000000000400000000000000000000000000000000000000000000000000000000000000001000000000000000000000000000000000000000000000000000000000000002000000000000000000000000000000000000000000000000000000000000000e4472b43f30000000000000000000000000000000000000000000000000058d15e17628…	16112649	0xc546c61021bd50f2c426973694cd2bb1f1f5bb8db69612fc51b3472d9cec49c4
67481	0xa95ff44eb458790a46039617df7d45092d9000f38c15c0ec164e7930a05d2d66	0x23f4569002a5a07f0ecf688142eeb6bcd883eef8	0xdac17f958d2ee523a2206206994597c13d831ec7	0	0xa9059cbb000000000000000000000000fc7b7567d4c12ca85c5272e4dce59423331cb0c4000000000000000000000000000000000000000000000000000000008e34ffcc	16112649	0xc546c61021bd50f2c426973694cd2bb1f1f5bb8db69612fc51b3472d9cec49c4
67482	0xf58886635e9bd52a587d21e4af1f90ecca1182e808da13bd3e2ddfa3bdb6f513	0xa4b1e63cb4901e327597bc35d36fe8a23e4c253f	0x1c479675ad559dc151f6ec7ed3fbf8cee79582b6	0	0x8f111f3c000000000000000000000000000000000000000000000000000000000000956000000000000000000000000000000000000000000000000000000000000000c00000000000000000000000000000000000000000000000000000000000048d2a000000000000000000000000e64a54e2533fd126c2e452c5fab544d80e2e4eb5000000000000000000000000000000000000000000000000000000000146409a000000000000000000000000000000000000000000000000000000000146425000000…
67484	0xf508a24f1c586ed4c402a8f7f871e60fd4c3cc4fe9fd5005631d425e3dfedf38	0x2c8194bcf7657e76f09b7a79ab769057d313f5e0	0xa0b86991c6218b36c1d19d4a2e9eb0ce3606eb48	0	0xa9059cbb000000000000000000000000974caa59e49682cda0ad2bbe82983419a2ecc40000000000000000000000000000000000000000000000000000000004a817c800	16112649	0xc546c61021bd50f2c426973694cd2bb1f1f5bb8db69612fc51b3472d9cec49c4
67485	0x1a8601c5294c94d95255ea7836501244b66118a703455713fe29554d920d32bb	0x2fa41b91bdec7f28922c06a53273e22975058ee7	0x06450dee7fd2fb8e39061434babcfc05599a6fb8	0	0x9ff054df00000000000000000000000000000000000000000000000000000000000001af	16112649	0xc546c61021bd50f2c426973694cd2bb1f1f5bb8db69612fc51b3472d9cec49c4
67486	0xaf4766154720bc162230d950396138f7c1bd5de224f118a5eaf80f33be29ee2c	0x21a31ee1afc51d94c2efccaa2092ad1028285549	0xa1d0e215a23d7030842fc67ce582a6afa3ccab83	0	0xa9059cbb0000000000000000000000002bfb4dfdefcc4a72f03b0a3464eb2eafa2633583000000000000000000000000000000000000000000000000d32a1761d6580000	16112649	0xc546c61021bd50f2c426973694cd2bb1f1f5bb8db69612fc51b3472d9cec49c4
67487	0x9999f184cf5de1152c70d5d81bde770051ea0ab83f4a869013fbc6ffb8f1f7b8	0x004f74a8388ce91950f29ea3e37ef604693a6395	0xa0b86991c6218b36c1d19d4a2e9eb0ce3606eb48	0	0xa9059cbb0000000000000000000000007578affe28c326263460fc1cab7a9daccf4f1aa3000000000000000000000000000000000000000000000000000000012a05f200	16112649	0xc546c61021bd50f2c426973694cd2bb1f1f5bb8db69612fc51b3472d9cec49c4
67488	0x8922dc2719ca29dfd754bfe73b1ce2279d9e11a6dfbaadfc676fd83523b2f4a7	0x6db303b564a05e9c17fbb22c7108561e08c3ae7b	0xc186fa914353c44b2e33ebe05f21846f1048beda	0	0x566887000000000000000000000000006b175474e89094c44da98b954eedeac495271d0f00000000000000000000000000000000000000000000000003880ee0e09affb9	16112649	0xc546c61021bd50f2c426973694cd2bb1f1f5bb8db69612fc51b3472d9cec49c4
67489	0x188e4177763332b5650034d4222a7d2d9e08f0aa5a02a9a74db5cfd08ca383d6	0x02dd7f9f820a73d79ab852d1761324798784bcf2	0xed3877bc8ae1d82a6296b09818ecafe58d9012ba	1.35e+17	0x	16112649	0xc546c61021bd50f2c426973694cd2bb1f1f5bb8db69612fc51b3472d9cec49c4
67490	0xe7f92d7d27f6b908100870d336da6f536eedb2622dd08245d9f4216ca6e1ec02	0xae26eaad142d57377894ea7587202d19a78d6dfe	0x150f94b44927f078737562f0fcf3c95c01cc2376	1.74e+18	0x1114cd2a000000000000000000000000000000000000000000000000000000000000006e000000000000000000000000ae26eaad142d57377894ea7587202d19a78d6dfe00000000000000000000000000000000000000000000000000000000000000a0000000000000000000000000000000000000000000000000183156d42998600000000000000000000000000000000000000000000000000018125f5ac81b74000000000000000000000000000000000000000000000000000000000000000014ae26e…	16112649	0xc546c61021bd50f2c426973694cd2bb1f1f5bb8db69612fc51b3472d9cec49c4
67491	0xd7fec083889a3cb058598caebfb5cda3050631f31b16e8fbe13d9b207eaa1879	0xd3ba34b51199b4609028046c2a4fc56910852b90	0x6c410cf0b8c113dc6a7641b431390b11d5515082	0	0xf8e93ef900000000000000000000000000000000000000000000000000000000000000200000000000000000000000000000000000000000000000000000000000000001000000000000000000000000000000000000000000000000000000000000479d	16112649	0xc546c61021bd50f2c426973694cd2bb1f1f5bb8db69612fc51b3472d9cec49c4
67493	0xdc16740d744b9b5cd7e92957acf1946930928f2f99f3ed850b86659db3e3a33b	0x21a31ee1afc51d94c2efccaa2092ad1028285549	0x767fe9edc9e0df98e07454847909b5e959d7ca0e	0	0xa9059cbb00000000000000000000000098c3d3183c4b8a650614ad179a1a98be0a8d6b8e000000000000000000000000000000000000000000000024ab5302217fee0000	16112649	0xc546c61021bd50f2c426973694cd2bb1f1f5bb8db69612fc51b3472d9cec49c4
67495	0xf773355e7306080c040d3a7634d348404db8dad58c1302757fd9444cf71af686	0xcd1c4d52bc5c2a06051a8fa51886a3af4a4af00c	0x68b3465833fb72a70ecdf485e0e4c7bd8665fc45	1.5e+17	0x5ae401dc00000000000000000000000000000000000000000000000000000000638cd21b00000000000000000000000000000000000000000000000000000000000000400000000000000000000000000000000000000000000000000000000000000001000000000000000000000000000000000000000000000000000000000000002000000000000000000000000000000000000000000000000000000000000000e4472b43f30000000000000000000000000000000000000000000000000214e8348c4f0…	16112649	0xc546c61021bd50f2c426973694cd2bb1f1f5bb8db69612fc51b3472d9cec49c4
67496	0x8b3f9c3e38af08dcd2a17f11f00cbb74a8742769ae2cb17372c059d092855b3f	0x96df6f4941103ee057ca06a24e7ecc75dba7b9af	0xdac17f958d2ee523a2206206994597c13d831ec7	0	0xa9059cbb00000000000000000000000028c6c06298d514db089934071355e5743bf21d6000000000000000000000000000000000000000000000000000000012a05f2000	16112649	0xc546c61021bd50f2c426973694cd2bb1f1f5bb8db69612fc51b3472d9cec49c4
67499	0xd7e16d49776870fffad2e522ef8fc805b335cc03e260eb61d2d6b5589b69f601	0x471e0f3328d72b17091970d3fd29d6983ed4251b	0x6c27ea8f74cff8e1621d39005a814b6f9559862e	0	0xf242432a000000000000000000000000471e0f3328d72b17091970d3fd29d6983ed4251b00000000000000000000000091c7b17839e4a12d665b7c5d12230c4dd77b81e60000000000000000000000000000000000000000000000000000000000000000000000000000000000000000000000000000000000000000000000000000000100000000000000000000000000000000000000000000000000000000000000a00000000000000000000000000000000000000000000000000000000000000000	16112649	0xc546c61021bd50f2c426973694cd2bb1f1f5bb8db69612fc51b3472d9cec49c4
67500	0x8546027b9ceca87b282debf6a71e088afedd80d128dfe06aa6b884167d19e084	0x60b8c46648c46c7ffd87e4d79fd04f6d111e3549	0x99c9fc46f92e8a1c0dec1b1747d010903e884be1	1e+18	0xb1a1a8820000000000000000000000000000000000000000000000000000000000030d4000000000000000000000000000000000000000000000000000000000000000400000000000000000000000000000000000000000000000000000000000000000	16112649	0xc546c61021bd50f2c426973694cd2bb1f1f5bb8db69612fc51b3472d9cec49c4
67502	0xb63a1541b54aa4eaa45ce87a65d894d0f352e34ad1b2e37f95918b009955a744	0x28c6c06298d514db089934071355e5743bf21d60	0xa1d0e215a23d7030842fc67ce582a6afa3ccab83	0	0xa9059cbb0000000000000000000000005910a9f4a27d3905b70372efa6f766ddc982e697000000000000000000000000000000000000000000000000299a53378baa8000	16112649	0xc546c61021bd50f2c426973694cd2bb1f1f5bb8db69612fc51b3472d9cec49c4
67505	0xcfc3f07a527da4f86d5021f79838a3ad6fb796fae157618a0f9b403de0a6819f	0x73064f451b0d7e1b0fc16b46deb268d460b87072	0xa1d0e215a23d7030842fc67ce582a6afa3ccab83	0	0xa9059cbb00000000000000000000000028c6c06298d514db089934071355e5743bf21d60000000000000000000000000000000000000000000000000113b384708130000	16112649	0xc546c61021bd50f2c426973694cd2bb1f1f5bb8db69612fc51b3472d9cec49c4
67506	0xd5ddb752a4b699118d66a93a26f2741f67f40c339e516a7e874b67f6e7f3daea	0x57d4e9b4a191d2bba64abd6c9250a500e29eea74	0x4c0d258d45649cddd95da2ee3bc887851703c497	1.74e+16	0x	16112649	0xc546c61021bd50f2c426973694cd2bb1f1f5bb8db69612fc51b3472d9cec49c4
67507	0x0fa83358036697acd5325765df57883798d216424578d0322d92e86233772436	0x27eb076922b67b79616bacf8de332833c431c008	0xfd0000000100069ad1670066004306009b487ad7	16112649	0x000002007809cdd479ce09140300000000000000000002674f542e00013400b79376c03e654fede2f6530f0ceb81d2408482db01994a8f5f96d5436e43112c2fbc6a9f70da9e4e16d400440000095ea7b30000000000000000000000006f94ac93ac7844f442ff07fffa268dac8656da2a00000000000000000000000000000000000000000000000000000002674f542d996f94ac93ac7844f442ff07fffa268dac8656da2a00a40000d5bcb9b50000000000000000000000004a8f5f96d5436e43112c2fbc6…	16112649	0xc546c61021bd50f2c426973694cd2bb1f1f5bb8db69612fc51b3472d9cec49c4
67509	0xb210cdc629e01c4b3a756c810054e0aa1877808a46f86b632112b3c8fe4fc04a	0xdafea492d9c6733ae3d56b7ed1adb60692c98bc5	0xffd22b84fb1d46ef74ed6530b2635be61340f347	2.53e+16	0x	16112649	0xc546c61021bd50f2c426973694cd2bb1f1f5bb8db69612fc51b3472d9cec49c4
67510	0x7c3e347f3b996e6dad1ef63ef4406333264760b600e45fde2bdcd20094a18b28	0x2c2eb50f48d9700400c9f049fe5e562d33b29997	0x04fa0d235c4abf4bcf4787af4cf447de572ef828	0	0xa9059cbb00000000000000000000000028c6c06298d514db089934071355e5743bf21d60000000000000000000000000000000000000000000000041cfa267f3cc380000	16112649	0xc546c61021bd50f2c426973694cd2bb1f1f5bb8db69612fc51b3472d9cec49c4
67512	0xda0ed9530130d610a361e273013f53bc20bfbc97743331a9c4d88d4c26b059d0	0xa9831d89c4067bf7518efbcb6351ef6dd0059f33	0xdac17f958d2ee523a2206206994597c13d831ec7	0	0x23b872dd000000000000000000000000e2a036fe1453aab25a72610735900d1950f9b79f000000000000000000000000b6d385798f4163def1665cf243320236b30aa9610000000000000000000000000000000000000000000000000000000000000000	16112649	0xc546c61021bd50f2c426973694cd2bb1f1f5bb8db69612fc51b3472d9cec49c4
67513	0x797f7ce7f6515455b082db62b6f12c176bb4deeb2f97d6ad03100aa971c16e43	0xf84d55ba14be5a69a227d3d95e47981f1b66368a	0xff1f2b4adb9df6fc8eafecdcbf96a2b351680455	3.38e+16	0x7ff48afb0000000000000000000000000000000000000000000000000000000000000000000000000000000000000000000000000000000000000000007802bb24834000000000000000000000000000f84d55ba14be5a69a227d3d95e47981f1b66368a0000000000000000000000000000000000000000000000000000000000000000	16112649	0xc546c61021bd50f2c426973694cd2bb1f1f5bb8db69612fc51b3472d9cec49c4
67516	0x7bba4e230782cb26f41c03ad13b27e1a29ab6537a212fa143343c62356a0c4b1	0x68b001552480932276cf9d5f4fff57877cec14a7	0x8193dcd2369bf94c6f28a181cff9bca38e34bcd1	0	0x38d0743600000000000000000000000000000000000000000000009d99fdef1c2b63e97b0000000000000000000000000000000000000000000000000000000000000001	16112649	0xc546c61021bd50f2c426973694cd2bb1f1f5bb8db69612fc51b3472d9cec49c4
67518	0x037a67b64c399bfec94d9b8f3b42268a1bb1916ff11e40add18b2a98c67024cd	0x4bc070ab6dbf857d575e8c8141fe387a468a145f	0x08e3e9e128faebed08cffcdcbb77addde318b7b5	9000000000000000	0x	16112649	0xc546c61021bd50f2c426973694cd2bb1f1f5bb8db69612fc51b3472d9cec49c4
67521	0xba9418079a51764ab0569de3bc2c3a2a88f19d53aaa7bd5dd7a6528fe5734dc5	0xbbabeb17e98a4077a987916909c7f4176dd6696c	0x68b3465833fb72a70ecdf485e0e4c7bd8665fc45	0	0x5ae401dc00000000000000000000000000000000000000000000000000000000638cd21b000000000000000000000000000000000000000000000000000000000000004000000000000000000000000000000000000000000000000000000000000000020000000000000000000000000000000000000000000000000000000000000040000000000000000000000000000000000000000000000000000000000000016000000000000000000000000000000000000000000000000000000000000000e4472b4…	16112649	0xc546c61021bd50f2c426973694cd2bb1f1f5bb8db69612fc51b3472d9cec49c4
67524	0xa291b51489292ca019b6bfaf658d3f1f8769a6baadcc3dca4fb44b25dd5c1c27	0x151b381058f91cf871e7ea1ee83c45326f61e96d	0x04a6439fdf2ba3db29a72098a9fa7b22d3789435	1.67e+17	0x	16112649	0xc546c61021bd50f2c426973694cd2bb1f1f5bb8db69612fc51b3472d9cec49c4
67525	0x5ed22cff3b386af5608d2f4620e3fea282130b555d0e8a785db50d3a43c4d092	0x91aae0aafd9d2d730111b395c6871f248d7bd728	0x98c3d3183c4b8a650614ad179a1a98be0a8d6b8e	0	0xce2e62ff0000000000000000000000000000000000000000000000b197d0b178d09632560000000000000000000000000000000000000000000000000b425289c1c8960000000000000000000000000099dfde431b40321a35deb6aeb55cf338ddd6eccd0000000000000000000000000202be363b8a4820f3f4de7faf5224ff05943ab1000000000000000000000000000000000000000000000000000000000000000100000000000000000000000000000000000000000000000000000000638ccb78	16112649	0xc546c61021bd50f2c426973694cd2bb1f1f5bb8db69612fc51b3472d9cec49c4
67526	0x3c496ee9687a259f529afd944883b3da6cad73ba882a274a2942a4dd6aa52fc7	0x51df53c3c3a963e03d6210914b20f36d4d7531a0	0x68b3465833fb72a70ecdf485e0e4c7bd8665fc45	0	0x5ae401dc00000000000000000000000000000000000000000000000000000000638cd2030000000000000000000000000000000000000000000000000000000000000040000000000000000000000000000000000000000000000000000000000000000100000000000000000000000000000000000000000000000000000000000000200000000000000000000000000000000000000000000000000000000000000124b858183f0000000000000000000000000000000000000000000000000000000000000…	16112649	0xc546c61021bd50f2c426973694cd2bb1f1f5bb8db69612fc51b3472d9cec49c4
67527	0xcdf9e4957c918c721175f14d6ea7b6653ba0896fdbf77c9fe3daf041604702ca	0x7dc69a2fe85c4b3a2b317217caee27e500fc993a	0x34d85c9cdeb23fa97cb08333b511ac86e1c4e258	0	0xa22cb46500000000000000000000000000000000000111abe46ff893f3b2fdf1f759a8a80000000000000000000000000000000000000000000000000000000000000001	16112649	0xc546c61021bd50f2c426973694cd2bb1f1f5bb8db69612fc51b3472d9cec49c4
67530	0xd87bb8ca639f02d771f4c6b0637717057fb0c943c76c619456abac1e1a9931b5	0x18adb1185658427f37764b95f6e2fa0aa93c5112	0xbfef411d9ae30c5b471d529c838f1abb7b65d67f	7101	0xfd13825d00000000000000000000000000000000000000000000000005b4f9505038fc400000000000000000000000000000000000000000000000001f34d5f7233bd733000000000000000000000000088ee5007c98a9677165d78dd2109ae4a3d04d0c0000000000000000000000000bc529c00c6401aef6d220be8c6ea1667f6ad93e00000000000000000000000000000000000000000000000000000000000000010000000000000000000000000000000000000000000000000000000000f5dc0a00000…	16112649	0xc546c61021bd50f2c426973694cd2bb1f1f5bb8db69612fc51b3472d9cec49c4
67532	0x427ef9c768851187e629212d6793c2655fbb91c46a588535b87f45703f8af7fc	0xa9831d89c4067bf7518efbcb6351ef6dd0059f33	0xa0b86991c6218b36c1d19d4a2e9eb0ce3606eb48	0	0x23b872dd00000000000000000000000039179a6ee09866ccf14bc7d59be29ad0542273b300000000000000000000000019bea6bbe1fee61338473e3fd4d11ed56a44ede60000000000000000000000000000000000000000000000000000000000000000	16112649	0xc546c61021bd50f2c426973694cd2bb1f1f5bb8db69612fc51b3472d9cec49c4
67535	0xff576270326d3b56b566700379e416b70f3a622387db298017ced2c9528d4f53	0x2017afe23eb6766988e2546fe88ee4ee16b781f6	0xbde26717c6d0445a13b9e0488a766935c3f8e23d	0	0xf98d63ec000000000000000000000000000000000000000000000000000000000000004000000000000000000000000000000000000000000000000000000000000006a00000000000000000000000000000000000000000000000000000000000000032000000000000000000000000d08887cd3eb0315927fd560ef3a645e8cf96465b000000000000000000000000d0817ba3a45c3cc914525e178f5a62db44267fd2000000000000000000000000d071e071ebc30ce2bf36322a711057b75f1930a100000…	16112649	0xc546c61021bd50f2c426973694cd2bb1f1f5bb8db69612fc51b3472d9cec49c4
67536	0x0da7d61d557b7c6b576857f8688e1f856d3447c131e385223ca7fda343fea175	0xdfd5293d8e347dfe59e90efd55b2956a1343963d	0x80c62fe4487e1351b47ba49809ebd60ed085bf52	0	0xa9059cbb0000000000000000000000000142609d3510a76677fa5bcf3e39d34e6f7e3172000000000000000000000000000000000000000000000aebfea96957a2440000	16112649	0xc546c61021bd50f2c426973694cd2bb1f1f5bb8db69612fc51b3472d9cec49c4
67539	0x301e2159e57619622f7a490c6ff6f876e13d66c1c98e215ba0f4b4f1c241c4c9	0xdfd5293d8e347dfe59e90efd55b2956a1343963d	0x71ab77b7dbb4fa7e017bc15090b2163221420282	0	0xa9059cbb0000000000000000000000008eb56a6ee55352a752dfb21f440d1c8669072ec80000000000000000000000000000000000000000000001bace8695b451030000	16112649	0xc546c61021bd50f2c426973694cd2bb1f1f5bb8db69612fc51b3472d9cec49c4
67541	0x5626f2907da797fcfc2d50fbbbf124e708f273d6c682ff1fbdeda7052a05db94	0x03c9399a4914fe167faf847f89224b4b607619b4	0x2d2a4e03ab7619e81d8fc7145fb651b62479391f	0	0x095ea7b300000000000000000000000068b3465833fb72a70ecdf485e0e4c7bd8665fc45ffffffffffffffffffffffffffffffffffffffffffffffffffffffffffffffff	16112649	0xc546c61021bd50f2c426973694cd2bb1f1f5bb8db69612fc51b3472d9cec49c4
67542	0x5fded1e74d493902253c28d7bb35d28906e4d0e5e7be80c0de651a2f558983e1	0x292f04a44506c2fd49bac032e1ca148c35a478c8	0xdac17f958d2ee523a2206206994597c13d831ec7	0	0x23b872dd0000000000000000000000004a94cf690fe5817cb68735b2d4830ea2e373f04a000000000000000000000000292f04a44506c2fd49bac032e1ca148c35a478c80000000000000000000000000000000000000000000000000000000020978180	16112649	0xc546c61021bd50f2c426973694cd2bb1f1f5bb8db69612fc51b3472d9cec49c4
67543	0xbb87ce54abeed66e4e52e84d70199d7bd7f64f45ee4193b94d0503fb1864013e	0xc88322caff38633fae0692d1ec0f5a4207ec3ced	0xc18c07a18198a6340cf4d94855fe5eb6dd33b46e	0	0xa9059cbb000000000000000000000000a7af5917f769060d9991a8382d395ff84bddc9c00000000000000000000000000000000000000000000000000000000000000043	16112649	0xc546c61021bd50f2c426973694cd2bb1f1f5bb8db69612fc51b3472d9cec49c4
67548	0xce62508900eaf51bb954ee3a84e6d54e6e9a17578a98f8d05dffa5d304916667	0x28c6c06298d514db089934071355e5743bf21d60	0xdac17f958d2ee523a2206206994597c13d831ec7	0	0xa9059cbb0000000000000000000000007df1f5723f1650dabd0ce8db2a3be611031e77b30000000000000000000000000000000000000000000000000000000002ca1c80	16112649	0xc546c61021bd50f2c426973694cd2bb1f1f5bb8db69612fc51b3472d9cec49c4
67552	0x729eedb443f64433f44e98d7dba9db216bff0eb2a466affbd9bc72360d469201	0xc86a944e0526894a1a1f8ac01a80fc9a54bf5042	0x0bc529c00c6401aef6d220be8c6ea1667f6ad93e	0	0xa9059cbb00000000000000000000000028c6c06298d514db089934071355e5743bf21d600000000000000000000000000000000000000000000000004af0a763bb1c0000	16112649	0xc546c61021bd50f2c426973694cd2bb1f1f5bb8db69612fc51b3472d9cec49c4
67553	0x901123681abb0020e0467d4cf8ff6f4fc7a3e57dd674f914ba035d2e1972f19a	0xdfd5293d8e347dfe59e90efd55b2956a1343963d	0xdac17f958d2ee523a2206206994597c13d831ec7	0	0xa9059cbb0000000000000000000000005cd174dd6a131f8b6a9a6be5b5037474cb9f93ad0000000000000000000000000000000000000000000000000000001ac760c069	16112649	0xc546c61021bd50f2c426973694cd2bb1f1f5bb8db69612fc51b3472d9cec49c4
67554	0x5325f973562af79269fd1b6f056dbb50a23a0d955d729becd238083ab674454e	0x5ac4997214aff26f2a2a87a717f69ff4530c3517	0x00000000006c3852cbef3e08e8df289169ede581	0	0xfb0f3ee100000000000000000000000000000000000000000000000000000000000000200000000000000000000000006d4bbc0387dd4759eee30f6a482ac6dc2df3facf000000000000000000000000000000000000000000000000000000000000000100000000000000000000000000000000000000000000000000000000000000010000000000000000000000005e29996ab68c9171f74f99db1501b2b580470390000000000000000000000000004c00500000ad104d7dbd00e3ae0a5c00560c0000000…	16112649	0xc546c61021bd50f2c426973694cd2bb1f1f5bb8db69612fc51b3472d9cec49c4
67555	0xd5daa10a5b63587ffaba524bb58973aa9101dbd8b9464bb5d6d7554064c6b11f	0x36e36ca99218d21b444b5068dc6ed0c907119651	0xd533a949740bb3306d119cc777fa900ba034cd52	0	0x095ea7b30000000000000000000000007d2768de32b0b80b7a3454c06bdac94a69ddc7a9ffffffffffffffffffffffffffffffffffffffffffffffffffffffffffffffff	16112649	0xc546c61021bd50f2c426973694cd2bb1f1f5bb8db69612fc51b3472d9cec49c4
67556	0xd6cf2ed2efdb08eea8893e9e22797367c78fec5cd781044f949bba400547cbe4	0xa192cec8616b62529dd97656d779d778ede49de5	0x76f4eed9fe41262669d0250b2a97db79712ad855	0	0xf17a454600000000000000000000000000000000000000000000000000000000000000c000000000000000000000000000000000000000000000000000000000000001a000000000000000000000000000000000000000000000000009a8f7f5659f981800000000000000000000000000000000000000000000000009903d28b3f799220000000000000000000000001d64fb0ffa8362b2e1ee7ee03929159551eab26e000000000000000000000000000000000000000000000000000000000000022000000…	16112649	0xc546c61021bd50f2c426973694cd2bb1f1f5bb8db69612fc51b3472d9cec49c4
67557	0xe9fa258893b4a31453063a55ceff2db81dff3ffa0cbc4d9f55fd0a3de21e606f	0x9696f59e4d72e237be84ffd425dcad154bf96976	0xdac17f958d2ee523a2206206994597c13d831ec7	0	0xa9059cbb0000000000000000000000005e16b03ecc9e68f3bea72903376d262cd6a804d400000000000000000000000000000000000000000000000000000000060b22ba	16112649	0xc546c61021bd50f2c426973694cd2bb1f1f5bb8db69612fc51b3472d9cec49c4
67560	0x245f074cfe04d27f72215871903120a1d089812506c7d19d8d39026e84abbe5c	0x65dbe5ef037efee8f4a39403337ab8fea3a0ae5e	0x68b3465833fb72a70ecdf485e0e4c7bd8665fc45	5e+16	0x5ae401dc00000000000000000000000000000000000000000000000000000000638cd1a300000000000000000000000000000000000000000000000000000000000000400000000000000000000000000000000000000000000000000000000000000001000000000000000000000000000000000000000000000000000000000000002000000000000000000000000000000000000000000000000000000000000000e4472b43f300000000000000000000000000000000000000000000000000b1a2bc2ec50…	16112649	0xc546c61021bd50f2c426973694cd2bb1f1f5bb8db69612fc51b3472d9cec49c4
67561	0x4ffc74f8739598eaa387ab769dff6da6e92c502bb79e6c4c6108d34f886f298e	0x59877d2ae955ef54a6c99a22357bfc00815181f0	0x00000000006c3852cbef3e08e8df289169ede581	6.5e+16	0xfb0f3ee100000000000000000000000000000000000000000000000000000000000000200000000000000000000000000000000000000000000000000000000000000000000000000000000000000000000000000000000000000000000000000000000000000000000000000000000000000000000000000000000000d59b5e731ed000000000000000000000000000e2591bd3d77e4ab6a477b8fc776a36f7aee13a1d000000000000000000000000004c00500000ad104d7dbd00e3ae0a5c00560c0000000…	16112649	0xc546c61021bd50f2c426973694cd2bb1f1f5bb8db69612fc51b3472d9cec49c4
67562	0xe806abf5e019540739d2ed334e17bc62ca417a87a8e586ce4058e33259412206	0xc5a93444cc4da6efb9e6fc6e5d3cb55a53b52396	0x3c5883c650d600bd543a9b5c8d9a3a6f5d16b8f4	7390000000000000	0x	16112649	0xc546c61021bd50f2c426973694cd2bb1f1f5bb8db69612fc51b3472d9cec49c4
67563	0xb526c4dcf600ab4c2959913067ee8ae1c25e0c4badc8adc705abe3de8db145e3	0xb51641a888474d1a3a6143a73bb3103e77f4c1ff	0x76f4eed9fe41262669d0250b2a97db79712ad855	3.35e+19	0xf17a454600000000000000000000000000000000000000000000000000000000000000c000000000000000000000000000000000000000000000000000000000000001a0000000000000000000000000000000000000000000000001d118080c1448665600000000000000000000000000000000000000000000000000000000000000010000000000000000000000001d64fb0ffa8362b2e1ee7ee03929159551eab26e000000000000000000000000000000000000000000000000000000000000022000000…	16112649	0xc546c61021bd50f2c426973694cd2bb1f1f5bb8db69612fc51b3472d9cec49c4
67564	0x521042cacb0aae638082f189335d119bb14f460a6610251cf970cb518cf27fa6	0x4c05eb80e5203363f847258590379810a56b461a	0x00000000006c3852cbef3e08e8df289169ede581	0	0xe7acab24000000000000000000000000000000000000000000000000000000000000008000000000000000000000000000000000000000000000000000000000000006600000007b02230091a7ed01230072f7006a004d60a8d4e71d599b8104250f0000000000000000000000000000000000000000000000000000000000000000000000000000000000000000000000000000000000000000000000000000000000a0000000000000000000000000000000000000000000000000000000000000000100000…	16112649	0xc546c61021bd50f2c426973694cd2bb1f1f5bb8db69612fc51b3472d9cec49c4
67565	0x60f9847fef09d77bb94c6b6453c6114bf85271c49fab13fe12589e34da2c2c6e	0xa9831d89c4067bf7518efbcb6351ef6dd0059f33	0xdac17f958d2ee523a2206206994597c13d831ec7	0	0x23b872dd000000000000000000000000661793672ddaa46eb41690aa3eac48bbc0c283110000000000000000000000007f5da7c0051b435b833665833da851b4c72a91080000000000000000000000000000000000000000000000000000000000000000	16112649	0xc546c61021bd50f2c426973694cd2bb1f1f5bb8db69612fc51b3472d9cec49c4
67566	0x067b5d778248173c0261b8006aebc0bdba7f661514f11ec9f8342b25e209144f	0x88dcdd4a0a58b7e2208805d547043c37dca2b6dc	0xf85a87fdabfea0cd5cd79a376f45dec99206a8bb	1.38e+18	0x	16112649	0xc546c61021bd50f2c426973694cd2bb1f1f5bb8db69612fc51b3472d9cec49c4
67567	0x9080f8b1fe2889f0de7d956d98c0cf52669414fbc94522c1f0a48a39e8e2ac52	0x2ea9b710e4038dfd78a7fba61b0ca1d3bba7b1d4	0xc02aaa39b223fe8d0a0e5c4f27ead9083c756cc2	0	0xa9059cbb00000000000000000000000087fdfa41a180810576de0f3bcb8c2b3535bc719000000000000000000000000000000000000000000000000004db732547630000	16112649	0xc546c61021bd50f2c426973694cd2bb1f1f5bb8db69612fc51b3472d9cec49c4
67568	0xbe6ef77696d0ce3fbfa9294063cf25e63d33358b8ef1afafff7349467d314402	0x389044f3ac7472060a0618116e3624a5f0f20f28	0xe58f5ea71b62e25e53a47593788f0fbf0be8453d	5.73e+17	0x	16112649	0xc546c61021bd50f2c426973694cd2bb1f1f5bb8db69612fc51b3472d9cec49c4
67569	0x73e84443976fb99f2fe6a63a38ba30e00de12af158f256c478bcc8d037b2a71c	0xfe1827c4bd5739d87ec362a8c065c588574ad750	0x7492e30d60d96c58ed0f0dc2fe536098c620c4c0	0	0xefef39a10000000000000000000000000000000000000000000000000000000000000001	16112649	0xc546c61021bd50f2c426973694cd2bb1f1f5bb8db69612fc51b3472d9cec49c4
67571	0x194e2fcf47fbce2d309d4df62cbc59f3dc4287a7ad2b70e66239a1f1b6568ec8	0x0d0707963952f2fba59dd06f2b425ace40b492fe	0xacf8d5e515ed005655dfefa09c22673a37a7cdee	0	0xa9059cbb0000000000000000000000009b2a8a36a3eeae431ae50fe61dd8b120c39e9e1e0000000000000000000000000000000000000000f85cce5d692ec174cb1a9800	16112649	0xc546c61021bd50f2c426973694cd2bb1f1f5bb8db69612fc51b3472d9cec49c4
67572	0xc571838185839252ab40f996fcf28652fd2f38e0f89fe3df95728c6e4d93cf6b	0x775c63ed0b85ac28b46ccc0486621173a69cf2c6	0xb76fbbb30e31f2c3bdaa2466cfb1cfe39b220d06	0	0x925489a8000000000000000000000000000000000000000000000000000000000000002000000000000000000000000000000000000000000000000000000000000000040000000000000000000000000000000000000000000000000000000000001d1d0000000000000000000000000000000000000000000000000000000000000db60000000000000000000000000000000000000000000000000000000000000ec00000000000000000000000000000000000000000000000000000000000000eed	16112649	0xc546c61021bd50f2c426973694cd2bb1f1f5bb8db69612fc51b3472d9cec49c4
67573	0x344571a2d3635c597a05f7c842ebbe59a25a48cd40c488933c827b45ce4408e3	0xa299c04eb002e667bcb6c0d38a024eb5022a5e1a	0x04cdd2c2ae8b9dd90754ebbbf8ea3464e4dcccad	384000000000000	0x	16112649	0xc546c61021bd50f2c426973694cd2bb1f1f5bb8db69612fc51b3472d9cec49c4
67576	0x244377ee48f17ae5250a00289826b08bf209015b2fc7edbe2c32a925f19e6fee	0x742d86fa3f02f2dd373551aa2b132ee22b4a7571	0x52791b4dae153214ed4ae890810491414c7ae2db	0	0x57bc3d78000000000000000000000000742d86fa3f02f2dd373551aa2b132ee22b4a757100000000000000000000000000000000000000000000000000000000000000170000000000000000000000000000000000000000000000000000000000000001000000000000000000000000eeeeeeeeeeeeeeeeeeeeeeeeeeeeeeeeeeeeeeee000000000000000000000000000000000000000000000000000000000000000000000000000000000000000000000000000000000000000000000000000000e000000…	16112649	0xc546c61021bd50f2c426973694cd2bb1f1f5bb8db69612fc51b3472d9cec49c4
67577	0x01c4fa116959457d2401795f347b6efb5bb512fb806e40d185ae59018016ce89	0xcaefd832536143e6c7985ca78f1e17fd0b05c4bf	0x4976fb03c32e5b8cfe2b6ccb31c09ba78ebaba41	0	0xac9650d80000000000000000000000000000000000000000000000000000000000000020000000000000000000000000000000000000000000000000000000000000000500000000000000000000000000000000000000000000000000000000000000a000000000000000000000000000000000000000000000000000000000000001c000000000000000000000000000000000000000000000000000000000000002e0000000000000000000000000000000000000000000000000000000000000040000000…	16112649	0xc546c61021bd50f2c426973694cd2bb1f1f5bb8db69612fc51b3472d9cec49c4
67579	0x1cec146acc10dbe2a8a7dfba0eea5164386b26b0d85bcb18b919bc26b3ecf2e8	0x46f48d8e912527124c76e86378e378b643cb14c7	0x68b3465833fb72a70ecdf485e0e4c7bd8665fc45	0	0x5ae401dc00000000000000000000000000000000000000000000000000000000638cd21b000000000000000000000000000000000000000000000000000000000000004000000000000000000000000000000000000000000000000000000000000000020000000000000000000000000000000000000000000000000000000000000040000000000000000000000000000000000000000000000000000000000000016000000000000000000000000000000000000000000000000000000000000000e4472b4…	16112649	0xc546c61021bd50f2c426973694cd2bb1f1f5bb8db69612fc51b3472d9cec49c4
67581	0x57be8a5c25186bcb3a8559ba32d20d590af682247eb5375205ae33c606a6a0a1	0x389044f3ac7472060a0618116e3624a5f0f20f28	0x623a115feae4f5e8908729ba67d3c6aa1d7ca2d8	2.89e+17	0x	16112649	0xc546c61021bd50f2c426973694cd2bb1f1f5bb8db69612fc51b3472d9cec49c4
67583	0xedb6645e385f181f4963ae3e648772d2f3627547577c9dd5d5f5d76c824b7cc6	0x028575cee77ca4e90a24f40145b15f8a36cd0a02	0xdac17f958d2ee523a2206206994597c13d831ec7	0	0xa9059cbb000000000000000000000000e2009d12fa84d04a04ba2163e06cbdb4c0d4238d000000000000000000000000000000000000000000000000000000174876e800	16112648	0xa11a11554a9e0409db7a0699c4ed2a78f8107fbee236cf2d28f2f4554ffde2ba
67584	0x8e24f0ec114ec107faf13bf50ad3336aeb11a4ebb5486c721119131a3bac1a10	0x315a80ca55108a663ed7922d17dbc5b9c2ce8cf5	0xbd791598a2182e341ce9035f203130087197044b	0	0x6933e79a0000000000000000000000000000000000000000000000000000000000000040000000000000000000000000cda72070e455bb31c7690a170224ce43623d0b6f000000000000000000000000000000000000000000000000000000000000003c516d5443563542705234614e79314d3845345443444642446e634168434a544e466e784856705339656a674c42782f6d657461646174612e6a736f6e00000000	16112648	0xa11a11554a9e0409db7a0699c4ed2a78f8107fbee236cf2d28f2f4554ffde2ba
67587	0x9afa379d39085f42c6d57d909bd6a6452c9a470312d3fe48b069ee09aceb6009	0x75274a9e262ca24ac9934652adf836536b204d50	0x331438345811dd4fcb75f307074efbcc9e4f378a	1.51e+17	0x	16112648	0xa11a11554a9e0409db7a0699c4ed2a78f8107fbee236cf2d28f2f4554ffde2ba
67589	0x4896b26f56eda3539abb126d7e679bb1e6e9381bdfd3d24bbaf679bfda529121	0xa05e21550eb86462388783047da318d2de20bbda	0xf1db5c88ac2b757e8b33f2e58e19cc55b3039898	1.49e+16	0x	16112648	0xa11a11554a9e0409db7a0699c4ed2a78f8107fbee236cf2d28f2f4554ffde2ba
67590	0x57da1c7aba870cfcafea161790141f8ce6048fc66106457eea22c0e1c71adb08	0x690b9a9e9aa1c9db991c7721a92d351db4fac990	0x388c818ca8b9251b393131c08a736a67ccb19297	2.37e+16	0x	16112648	0xa11a11554a9e0409db7a0699c4ed2a78f8107fbee236cf2d28f2f4554ffde2ba
67591	0xfef2448bb609fa4ff7ada8a8ea9a95c116d5511c7099e440a66de30b53900b4b	0x6887246668a3b87f54deb3b94ba47a6f63f32985	0x5e4e65926ba27467555eb562121fac00d24e9dd2	0	0xd0f893440002b41b810000ae0000060000000000000000000000000000000000002300000000638ccafe0000f5dbd100000900000000638ccafe0000f5dbd300003c00000000638ccb0d0000f5dbd300000e00000000638ccb0d0000f5dbd400003800000000638ccb1c0000f5dbd4789ce4fd755c95dbf2388eefbde90e2911946e9566234837d2a5744a2b2982029b465ad82a920f259d02d220dda280128220884809d2e9ef75c0733f722fb02fd773aeeffbfbce1fe2b3e799f5ccca99356b661608d4bed…
67592	0xc47de14672b795c0ea0192492230dde4756a558ff211021067f36524ceb6ef4f	0xec30d02f10353f8efc9601371f56e808751f396f	0xdac17f958d2ee523a2206206994597c13d831ec7	0	0xa9059cbb0000000000000000000000009e97a7d4f5bf441ba2b3fa45948ae2f2ff14fc3c000000000000000000000000000000000000000000000000000000001a670502	16112648	0xa11a11554a9e0409db7a0699c4ed2a78f8107fbee236cf2d28f2f4554ffde2ba
67593	0x61df0d446b4128f148c791e5625b240a40fc5915a78ec3b02b7b0fa9b0d67ec1	0xcc97dc4b6488ca9731c98e1bd5656599b08bac91	0xc14a73fcc775a861e597f1df2e6b86d1c982e2cf	0	0xa22cb4650000000000000000000000001e0049783f008a0085193e00003d00cd54003c710000000000000000000000000000000000000000000000000000000000000000	16112648	0xa11a11554a9e0409db7a0699c4ed2a78f8107fbee236cf2d28f2f4554ffde2ba
67594	0x7362673ec9615dc676046dfb7591cf1a16bf3611ade8947cf90d39aecbc758a4	0xc86a944e0526894a1a1f8ac01a80fc9a54bf5042	0x767fe9edc9e0df98e07454847909b5e959d7ca0e	0	0xa9059cbb00000000000000000000000028c6c06298d514db089934071355e5743bf21d600000000000000000000000000000000000000000000000779d56bb76436a0000	16112648	0xa11a11554a9e0409db7a0699c4ed2a78f8107fbee236cf2d28f2f4554ffde2ba
67599	0xb5786f80a3ed955a6f15237f8d2b435f1737164f74ef0d01bac5e9fd87fc07df	0x767136d641f5e9c0880f0c850a51267a1c7eaeed	0x045da4bfe02b320f4403674b3b7d121737727a36	0	0x095ea7b30000000000000000000000006a9f9d6f5d672a9784c5e560a9648de6cbe2c54800000000000000000000000000000000000000000000023dea9ceb40b7410000	16112648	0xa11a11554a9e0409db7a0699c4ed2a78f8107fbee236cf2d28f2f4554ffde2ba
67601	0xab20745637ae4684fcb518c891e94c9d62c92290449b52540789976ee177cd3f	0x1a42cacb0f5b93f2569091fe9eecb627bfa34061	0x00000000006c3852cbef3e08e8df289169ede581	0	0xfd9f1e100000000000000000000000000000000000000000000000000000000000000020000000000000000000000000000000000000000000000000000000000000000100000000000000000000000000000000000000000000000000000000000000200000000000000000000000001a42cacb0f5b93f2569091fe9eecb627bfa34061000000000000000000000000004c00500000ad104d7dbd00e3ae0a5c00560c00000000000000000000000000000000000000000000000000000000000000016000000…	16112648	0xa11a11554a9e0409db7a0699c4ed2a78f8107fbee236cf2d28f2f4554ffde2ba
67602	0x8de9ae453d29f6087aa3389ad2dc1a0128ed509b38d2d1f38021a4c02e4e3bb8	0x9696f59e4d72e237be84ffd425dcad154bf96976	0xdac17f958d2ee523a2206206994597c13d831ec7	0	0xa9059cbb0000000000000000000000004c4d7b963ab3e5262a6fc77d22d3d6a99009d7dc0000000000000000000000000000000000000000000000000000000006021600	16112648	0xa11a11554a9e0409db7a0699c4ed2a78f8107fbee236cf2d28f2f4554ffde2ba
67603	0xefd5604ea683a5206fbe4f0848b89fe3da21d0fab4e1bbda6ebc43984f541f41	0x9430801ebaf509ad49202aabc5f5bc6fd8a3daf8	0x6f9c3bef589a747a050d2caf2e5390f20cc665a3	2e+16	0x	16112648	0xa11a11554a9e0409db7a0699c4ed2a78f8107fbee236cf2d28f2f4554ffde2ba
67605	0x18880565952614b3b1107a56c271fef6539c68d102707969fc5f53418973d36c	0x56eddb7aa87536c09ccc2793473599fd21a8b17f	0xdac17f958d2ee523a2206206994597c13d831ec7	0	0xa9059cbb00000000000000000000000054573ca8583dd2e21e1b4bd7ca499109b9f3b5d70000000000000000000000000000000000000000000000000000000019505bd2	16112648	0xa11a11554a9e0409db7a0699c4ed2a78f8107fbee236cf2d28f2f4554ffde2ba
67606	0xc6acdcdac09f8d7c228a835d0d896ae0e80b7561a93372ad9dce670199db5d60	0x354e9fa5c6ee7e6092158a8c1b203ccac932d66d	0xd06d97c518473dde323b2353f846cfc644953f48	3000000000000000	0x	16112648	0xa11a11554a9e0409db7a0699c4ed2a78f8107fbee236cf2d28f2f4554ffde2ba
67607	0x7ee3f3c38b413223d49a0287f89a05b95afe9d8f7e3c2f6538bab37b34dfb402	0xc1c4adec7bfbda45930ecced49a26f033ebcefb6	0xe2219591585e93398390a3ab046657136b95bf56	9680000000000000	0x	16112648	0xa11a11554a9e0409db7a0699c4ed2a78f8107fbee236cf2d28f2f4554ffde2ba
67608	0x289651a499960ca68e22da7ca33cb221d75c09559ace4b5b18e313418fab2a6e	0x3b794929566e3ba0f25e4263e1987828b5c87161	0x5f6b3938cc56f06de1148bc63439f4749e2e378d	1.62e+16	0x	16112648	0xa11a11554a9e0409db7a0699c4ed2a78f8107fbee236cf2d28f2f4554ffde2ba
67610	0x120a72824904684221774dce961dc0f2766c304c8a69593889645296f9099e96	0x3a5b42d8f4c8877ec5c9dd5e4358e964f035959b	0xb766b49ea985b6cdafbab1c505918b3b74b319df	0	0xa694fc3a00000000000000000000000000000000000000000000021dd1182db31e33f2c6	16112648	0xa11a11554a9e0409db7a0699c4ed2a78f8107fbee236cf2d28f2f4554ffde2ba
67613	0xe1f6512aaf0816be4e05bd967f9b104e61b848f55fc1fc3b96f84e9591a69652	0xcac725bef4f114f728cbcfd744a731c2a463c3fc	0x1b7fc4164bd56a070271c817ce4efaf2cc58ec96	1.03e+16	0x	16112648	0xa11a11554a9e0409db7a0699c4ed2a78f8107fbee236cf2d28f2f4554ffde2ba
67614	0x3df57be72d1f5c108cf56cdcd8da5bc4261c846d7ca9b406f703bc4a22022418	0x28c6c06298d514db089934071355e5743bf21d60	0x3845badade8e6dff049820680d1f14bd3903a5d0	0	0xa9059cbb000000000000000000000000c939bdb5641bec730b9f6ee3092db7aa12f5eaf600000000000000000000000000000000000000000000001a81c193ec13cd7800	16112648	0xa11a11554a9e0409db7a0699c4ed2a78f8107fbee236cf2d28f2f4554ffde2ba
67615	0xda66c8501df9d8cee94cf897d7465eeeb553b907c0df13c5be310a9a8ca38a95	0x98db3a41bf8bf4ded2c92a84ec0705689ddeef8b	0xb6aa1bf8fadf5b6749988140709d0fccfd01ed41	3.17e+17	0x	16112648	0xa11a11554a9e0409db7a0699c4ed2a78f8107fbee236cf2d28f2f4554ffde2ba
67616	0xa8a2782d9ba64d8437e268d1950de4488f57a8aaf44b108c0f5da14b1db830e7	0xcad621da75a66c7a8f4ff86d30a2bf981bfc8fdd	0x9fd491c9b35863849e546201e4df8b37b99b2ad0	1.08e+16	0x	16112648	0xa11a11554a9e0409db7a0699c4ed2a78f8107fbee236cf2d28f2f4554ffde2ba
67617	0x755bdeffa4cb3aa6fae23e5edce04a4f204771ef228a8f8a9d104e86893fcfab	0x83cc754dda833a93f1c7d4e1566b4785c27522d4	0xbe2629161cedae505fdd31d5ce291e4002913eb8	7.22e+17	0x	16112648	0xa11a11554a9e0409db7a0699c4ed2a78f8107fbee236cf2d28f2f4554ffde2ba
67618	0xeb1f6f11efa2587047cce15eac5e0626c3437e444c02d829b70c7d477fa3a6c3	0xc23f78c43b810f3a29168d5652c34f387d44dda3	0xba12222222228d8ba445958a75a0704d566bf2c8	0	0xb95cac281e19cf2d73a72ef1332c882f20534b6519be0276000200000000000000000112000000000000000000000000c23f78c43b810f3a29168d5652c34f387d44dda3000000000000000000000000c23f78c43b810f3a29168d5652c34f387d44dda30000000000000000000000000000000000000000000000000000000000000080000000000000000000000000000000000000000000000000000000000000008000000000000000000000000000000000000000000000000000000000000000e000000…	16112648	0xa11a11554a9e0409db7a0699c4ed2a78f8107fbee236cf2d28f2f4554ffde2ba
67619	0xeefe730a5fd18a590c026804b36e1022f4d18c340d49fdc9c67fa7f538f0007f	0x2383d2523d0c9dd42d00957168b2ba0eeface1b9	0xc02aaa39b223fe8d0a0e5c4f27ead9083c756cc2	4.1e+17	0xd0e30db0	16112648	0xa11a11554a9e0409db7a0699c4ed2a78f8107fbee236cf2d28f2f4554ffde2ba
67620	0x3d33015b36f0935f2137eff533ef8dd75cda257dd716538e572bc663c0c2be97	0x57d4e9b4a191d2bba64abd6c9250a500e29eea74	0x05cd59397c3f133a6c21fdf824452b983f01efbc	4.2e+16	0x	16112648	0xa11a11554a9e0409db7a0699c4ed2a78f8107fbee236cf2d28f2f4554ffde2ba
67622	0xf28fcb4f9fefe6ee359c4375707e885d74067487184c1b0795a86345cd0efab2	0xcd26bad5de6768663e4b404126a7b91403745a7f	0x514910771af9ca656af840dff83e8264ecf986ca	0	0xa9059cbb00000000000000000000000028c6c06298d514db089934071355e5743bf21d6000000000000000000000000000000000000000000000008cf23f909c0fa00000	16112648	0xa11a11554a9e0409db7a0699c4ed2a78f8107fbee236cf2d28f2f4554ffde2ba
67625	0xee446084cabf0da108bee99467bb2b0ac2888f31ef7095441291442c78716e45	0x8aa28b73a5ea7a7a1446ee51806fc70474615185	0xc02aaa39b223fe8d0a0e5c4f27ead9083c756cc2	0	0x095ea7b30000000000000000000000001e0049783f008a0085193e00003d00cd54003c710000000000000000000000000000000000000000000000000000000000000000	16112648	0xa11a11554a9e0409db7a0699c4ed2a78f8107fbee236cf2d28f2f4554ffde2ba
67626	0x9c5b2c80c623cc979a1ef0a62ce192b66d1c3006e6cb40b85957916a41a9f69a	0x8ec0fd12035e3a26de0d08b096b55098dc3421af	0xbdba08782cd9d1ddfcfa15a13701ed95b9365f15	2.1e+17	0x	16112648	0xa11a11554a9e0409db7a0699c4ed2a78f8107fbee236cf2d28f2f4554ffde2ba
67628	0xf831e3993df46e7fd5004f264adf8aba37b420d99e8bb3cb17b5d445f622302d	0x38523de7f1bbf1cd09a4f50fdcf9a2ab2c734a1a	0x172401c05a6f9d569d731f747d3bfd66b1c68e54	0	0x095ea7b30000000000000000000000007a250d5630b4cf539739df2c5dacb4c659f2488dffffffffffffffffffffffffffffffffffffffffffffffffffffffffffffffff	16112648	0xa11a11554a9e0409db7a0699c4ed2a78f8107fbee236cf2d28f2f4554ffde2ba
67630	0xd3faa402cf06eda28d5924e0b748e038c0d853ae68ca6f004632b324e71b4ff0	0x28c6c06298d514db089934071355e5743bf21d60	0xa1d0e215a23d7030842fc67ce582a6afa3ccab83	0	0xa9059cbb0000000000000000000000004bb2da4cc9d4210bea584806b13b6056edd3e29200000000000000000000000000000000000000000000000036cdaa93ca048000	16112648	0xa11a11554a9e0409db7a0699c4ed2a78f8107fbee236cf2d28f2f4554ffde2ba
67631	0x4b6c9b291789b01f34cba1e214f0ee785222b13697ae98b9eae26485f480ef2b	0xa4cfca09d930c6634f074ca6bea7ec69c0625037	0xdac17f958d2ee523a2206206994597c13d831ec7	0	0x095ea7b3000000000000000000000000881d40237659c251811cec9c364ef91dc08d300cffffffffffffffffffffffffffffffffffffffffffffffffffffffffffffffff	16112648	0xa11a11554a9e0409db7a0699c4ed2a78f8107fbee236cf2d28f2f4554ffde2ba
67632	0xec2e0321eadc7524e516a8d40e7977cba70cd48fcdd64271aac2946372b9753f	0xdbd3d920bef6dae092f24e0827404bd4dfb80009	0x3b3ae790df4f312e745d270119c6052904fb6790	0	0xb80c2f09000000000000000000000000000000000000000000000000002430ac177b0c01000000000000000000000000dac17f958d2ee523a2206206994597c13d831ec700000000000000000000000003ab458634910aad20ef5f1c8ee96f1d6ac549190000000000000000000000000000000000000000000000000000000002719c40000000000000000000000000000000000000000000000001db446304b591b3d300000000000000000000000000000000000000000000000000000000638cd92c00000…	16112648	0xa11a11554a9e0409db7a0699c4ed2a78f8107fbee236cf2d28f2f4554ffde2ba
67635	0x3a73ff93fec504262bacc0dafc0e8073d701dea2cd8736cda60d67f2bf46e034	0xd1faf168a2e25c2bf15f856453e457f2f3c216ff	0x6edab30ddc69285e479682fbfed1a3edce3d4b7d	2000000000000000	0x	16112648	0xa11a11554a9e0409db7a0699c4ed2a78f8107fbee236cf2d28f2f4554ffde2ba
67638	0x17d472454edfec98d83c2a1b996df359ae672be187fd5fdae027f1bbf7aedb16	0xcc97dc4b6488ca9731c98e1bd5656599b08bac91	0x8887ce34f6f1a4de4e8eb2a9195eeb261c413365	0	0xa22cb4650000000000000000000000001e0049783f008a0085193e00003d00cd54003c710000000000000000000000000000000000000000000000000000000000000000	16112648	0xa11a11554a9e0409db7a0699c4ed2a78f8107fbee236cf2d28f2f4554ffde2ba
67639	0xa828f29f54bc6c8be3c528b9341453a98bfd149c5c062c7876e62bf527f0dd95	0x5ef9d31556dd8430d1943f8dda11401977c42abf	0x32353a6c91143bfd6c7d363b546e62a9a2489a20	0	0xa9059cbb0000000000000000000000006cc5f688a315f3dc28a7781717a9a798a59fda7b0000000000000000000000000000000000000000000016d1f3cd988f42b40000	16112648	0xa11a11554a9e0409db7a0699c4ed2a78f8107fbee236cf2d28f2f4554ffde2ba
67641	0xda22bc860ff72bbddc6951b9f799ca8826b3e41d7948bd897b0971a360969fcc	0x8c8d7c46219d9205f056f28fee5950ad564d7465	0x72638ccb2b642313410a9e3dc40e6445715eb03c	4.62e+16	0x	16112648	0xa11a11554a9e0409db7a0699c4ed2a78f8107fbee236cf2d28f2f4554ffde2ba
67643	0xc5411f6b973001a1d9dbd90f246f284fcbb5d03a8fb4b91de698f721dd193c48	0xf16e9b0d03470827a95cdfd0cb8a8a3b46969b91	0xd13c7342e1ef687c5ad21b27c2b65d772cab5c8c	0	0xa9059cbb0000000000000000000000008ee3a84b67a2c45635dec3f46ec1f399f106097500000000000000000000000000000000000000000000000000000000000a14a9	16112648	0xa11a11554a9e0409db7a0699c4ed2a78f8107fbee236cf2d28f2f4554ffde2ba
67645	0x9a80ec6698a7179dd631e92cd37e626d8f27094ae40b61a145aa0bb79583dd9f	0xb287eac48ab21c5fb1d3723830d60b4c797555b0	0xece476cac765c6053f5beaa54911db5add050670	6.11e+16	0x	16112648	0xa11a11554a9e0409db7a0699c4ed2a78f8107fbee236cf2d28f2f4554ffde2ba
67646	0x2936a1b9be985041430243dc49fb1e3caed0abf5edd07265187cd59de03efe29	0x97b9d2102a9a65a26e1ee82d59e42d1b73b68689	0xdac17f958d2ee523a2206206994597c13d831ec7	0	0xa9059cbb0000000000000000000000004d0cc24ede815b80440cc52907923ef96ad3b7540000000000000000000000000000000000000000000000000000000002169bd6	16112648	0xa11a11554a9e0409db7a0699c4ed2a78f8107fbee236cf2d28f2f4554ffde2ba
67648	0x29b471871c0dc8af1cdb9ced5a1d7c264666d3c6ca9e777ea645b18359342f03	0x672aa2d12d80e73a8d82ef53636a1fc0fbbff470	0x949d48eca67b17269629c7194f4b727d4ef9e5d6	0	0xa9059cbb00000000000000000000000028c6c06298d514db089934071355e5743bf21d6000000000000000000000000000000000000000000000002af8e73a154db6b000	16112648	0xa11a11554a9e0409db7a0699c4ed2a78f8107fbee236cf2d28f2f4554ffde2ba
67649	0x6926e9e4738a582249b8f782add4445c4c30daa11d8e563173b319194ad4bb49	0x67ddb2184f3429359dca8c9f9166a5020bb1603f	0x68b3465833fb72a70ecdf485e0e4c7bd8665fc45	0	0x5ae401dc00000000000000000000000000000000000000000000000000000000638cd227000000000000000000000000000000000000000000000000000000000000004000000000000000000000000000000000000000000000000000000000000000020000000000000000000000000000000000000000000000000000000000000040000000000000000000000000000000000000000000000000000000000000016000000000000000000000000000000000000000000000000000000000000000e4472b4…	16112648	0xa11a11554a9e0409db7a0699c4ed2a78f8107fbee236cf2d28f2f4554ffde2ba
67650	0x28eb308a2fecae94ba9e6d2ba5861d52ab401dcf8b569b291bb2c52345e6b024	0xc8f33d8f4ff0d498eee7b80c5fa142ac89190f5a	0x25553828f22bdd19a20e4f12f052903cb474a335	0	0x791ac94700000000000000000000000000000000000000001d30b266477b36e02082263c0000000000000000000000000000000000000000000000000037a6b074587b3000000000000000000000000000000000000000000000000000000000000000a0000000000000000000000000c8f33d8f4ff0d498eee7b80c5fa142ac89190f5a00000000000000000000000000000000000000000000000000000000638cd203000000000000000000000000000000000000000000000000000000000000000200000…	16112648	0xa11a11554a9e0409db7a0699c4ed2a78f8107fbee236cf2d28f2f4554ffde2ba
67652	0xf598fbbee98e36a770d8ae839d4e09762bb2dfd07e86a4ba815a1446447a4d95	0x0ba16231c8632079f96df505e35e00d62e214d70	0x68b3465833fb72a70ecdf485e0e4c7bd8665fc45	7e+16	0x5ae401dc00000000000000000000000000000000000000000000000000000000638cd21b00000000000000000000000000000000000000000000000000000000000000400000000000000000000000000000000000000000000000000000000000000001000000000000000000000000000000000000000000000000000000000000002000000000000000000000000000000000000000000000000000000000000000e4472b43f300000000000000000000000000000000000000000000000000f8b0a10e470…	16112648	0xa11a11554a9e0409db7a0699c4ed2a78f8107fbee236cf2d28f2f4554ffde2ba
67654	0x9463184dcdf94f43484507a7e530180ad051c11b616a8915b899d5c918784e73	0xdfd5293d8e347dfe59e90efd55b2956a1343963d	0x929bc665aa05ae64c493d202fcc913731b2f1d4f	1.01e+16	0x	16112648	0xa11a11554a9e0409db7a0699c4ed2a78f8107fbee236cf2d28f2f4554ffde2ba
67655	0x4e8c96a02378ca553ff919f1cc56ca9248b7f2ca129b82618a909fa04ed83dce	0x91aa0c856fb04b62ee2de38c1932195c6982f2cb	0x68b3465833fb72a70ecdf485e0e4c7bd8665fc45	1.59e+17	0x5ae401dc00000000000000000000000000000000000000000000000000000000638cd20f000000000000000000000000000000000000000000000000000000000000004000000000000000000000000000000000000000000000000000000000000000020000000000000000000000000000000000000000000000000000000000000040000000000000000000000000000000000000000000000000000000000000016000000000000000000000000000000000000000000000000000000000000000e45023b…	16112648	0xa11a11554a9e0409db7a0699c4ed2a78f8107fbee236cf2d28f2f4554ffde2ba
67659	0xdb60eb5a3a6262c6ee9d48879d4f009e2f5d639739ad217980232abb253ee85c	0xf19d428f031ffe54b4f0140ecee3dae8f33c19fc	0xf95d3b9a15edec2620d6791b69d777d8678c03f1	0	0x55f804b30000000000000000000000000000000000000000000000000000000000000020000000000000000000000000000000000000000000000000000000000000005968747470733a2f2f6e667473746f726167652e6c696e6b2f697066732f626166796265696772723279616b6664656e36636336647962696b6c7735756335647a6a706b36716a63356467347070686734636c6164716434752f00000000000000	16112648	0xa11a11554a9e0409db7a0699c4ed2a78f8107fbee236cf2d28f2f4554ffde2ba
67660	0xb5758caa3b887d110563d69e666206f19756efa8c8e36baf25aeb365396d1dd3	0xfbb1b73c4f0bda4f67dca266ce6ef42f520fbb98	0xae5d18cffb649559e6d57f1e994e18035915165c	0	0x6ea056a9000000000000000000000000dac17f958d2ee523a2206206994597c13d831ec70000000000000000000000000000000000000000000000000000000008598368	16112648	0xa11a11554a9e0409db7a0699c4ed2a78f8107fbee236cf2d28f2f4554ffde2ba
67663	0xc3ec0a7cefb2ec17d02aab9ac9de8b95a4be59d44d5772757fb81ea6a63f6c2d	0x9b4835039a720f9b3b786454fc50cc2629866d55	0xa0b86991c6218b36c1d19d4a2e9eb0ce3606eb48	0	0xa9059cbb0000000000000000000000006896652e66389034b053c14c5e3d6e9c72b11c7b000000000000000000000000000000000000000000000000000000001db929a6	16112648	0xa11a11554a9e0409db7a0699c4ed2a78f8107fbee236cf2d28f2f4554ffde2ba
67665	0x06af67e25b9218e22cc41bfc499641e9f67215c3a09e91c4730b85247ed3f5e4	0xfdb16996831753d5331ff813c29a93c76834a0ad	0xdac17f958d2ee523a2206206994597c13d831ec7	0	0xa9059cbb000000000000000000000000555df0ba4068a302cc31128fd6dde331f865f8b100000000000000000000000000000000000000000000000000000000078d7ba6	16112648	0xa11a11554a9e0409db7a0699c4ed2a78f8107fbee236cf2d28f2f4554ffde2ba
67666	0xee36c142257ac060bee3f88677318d489d7f80242646139954f7d951dcad1a66	0x2845633f9cd219b43be29cae1ad4b776865e51d0	0xeeeec6476073778077b40a73fe32e23a9876cab4	7.91e+16	0x2b66d72e000000000000000000000000000000000000000000000000000000000000002000000000000000000000000000000000000000000000000000000000000000ee65794a68624763694f694a46557a49314e694973496d74705a434936496a64684e6a526c5a6d51314c544a694e4463744e475a6a5a6931684f4463784c5445785a6d59354f5451345954646a4f434a392e436763784d6a597a4c6a513345674e56553051614a4755324e54466a4d4746684c574935597a51744e4746694e7931694e4…	16112648	0xa11a11554a9e0409db7a0699c4ed2a78f8107fbee236cf2d28f2f4554ffde2ba
67667	0x72a20f59de0b59e0bacaa1e21ea5877dd3529712aa3df82163e38d0bad538e1c	0xb4810621d4cc39b220db7168bb0a83f37a81d078	0x881d40237659c251811cec9c364ef91dc08d300c	1.75e+17	0x5f57552900000000000000000000000000000000000000000000000000000000000000800000000000000000000000000000000000000000000000000000000000000000000000000000000000000000000000000000000000000000026db992a3b1800000000000000000000000000000000000000000000000000000000000000000c00000000000000000000000000000000000000000000000000000000000000017616972737761704c696768743346656544796e616d696300000000000000000000000…	16112648	0xa11a11554a9e0409db7a0699c4ed2a78f8107fbee236cf2d28f2f4554ffde2ba
67671	0xf1af5fc9b84b8260804c6d4558dd488a8a6d9e2502c0017d64b77a922997a604	0xf6b560e7f2e2946f77a57a4c386e1c0743910d07	0xbb126042235e6bd38b17744cb31a8bf4a206c045	0	0xa9059cbb000000000000000000000000da9e0d5783033c351ecc7343012f6cda79de4cee000000000000000000000000000000000000000000000001c6ef4890f077c000	16112648	0xa11a11554a9e0409db7a0699c4ed2a78f8107fbee236cf2d28f2f4554ffde2ba
67674	0x66fe64d08122b3b50383d277abb92ed1e97e8ede4ceb42e8743ef6c447ed469a	0xd978406d5d8d64690dce57753ddd432d095eb7b1	0x172401c05a6f9d569d731f747d3bfd66b1c68e54	0	0x095ea7b300000000000000000000000068b3465833fb72a70ecdf485e0e4c7bd8665fc45ffffffffffffffffffffffffffffffffffffffffffffffffffffffffffffffff	16112648	0xa11a11554a9e0409db7a0699c4ed2a78f8107fbee236cf2d28f2f4554ffde2ba
67675	0x6676a0e40dc4ec8d16ff83e09807329134712a789cc82f28483435b4dc4c8033	0x46340b20830761efd32832a74d7169b29feb9758	0x3fbe6356517489ec85e718bf6cf4f78591025eb3	1.82e+16	0x	16112648	0xa11a11554a9e0409db7a0699c4ed2a78f8107fbee236cf2d28f2f4554ffde2ba
67677	0xe548189a6b75cc2c89c7733773b85ca11501ebb30bf388109e5ba59e0c7a54c7	0xcc29be4ca92d4ecc43c8451fba94c200b83991f6	0x3d47ef9690bd00c77c568b73140dc20f34453766	0	0xc9807539000000000000000000000000000000000000000000000000000000000000008000000000000000000000000000000000000000000000000000000000000003200000000000000000000000000000000000000000000000000000000000000400000001010001000000000000000000000000000000000000000000000000000000000000000000000000000000000000000000000000000000000000000002800000000000000000000000d06422028a6e5ef9f0f31d40c4f38887000426c20307090…	16112648	0xa11a11554a9e0409db7a0699c4ed2a78f8107fbee236cf2d28f2f4554ffde2ba
67678	0x401c4542d53069900be7413f0be65fb5a368897e518101db2324e14cc8870f3e	0x1e37ac28b17ecfbcceff42c3f91e47cb45de2dc2	0xee00bad5c80f779186403fd290bd65256d39978c	1770000000000000	0x	16112648	0xa11a11554a9e0409db7a0699c4ed2a78f8107fbee236cf2d28f2f4554ffde2ba
67679	0x25c4f97a34f95f6774cc238ab9d8706401e9dab5a8b80f0d42d245c7fcbf8011	0x46340b20830761efd32832a74d7169b29feb9758	0xcfe41ea6ce0ba1d28f9880ad2cff9b8d7b18f937	6000000000000000	0x	16112648	0xa11a11554a9e0409db7a0699c4ed2a78f8107fbee236cf2d28f2f4554ffde2ba
67680	0x984a06a3fd896a5829783a9e0f67a0298bbfd0617f00382ba3348ade9a7fb663	0x9696f59e4d72e237be84ffd425dcad154bf96976	0xa99977f8f7e585fe0fa131b8ced73894facc3499	1.02e+16	0x	16112648	0xa11a11554a9e0409db7a0699c4ed2a78f8107fbee236cf2d28f2f4554ffde2ba
67681	0xaee172ef1ab27dd037870e706e9d32b60dd48ed5350df53269eefb597208af94	0xc241b1ee1a167364d9d85c0c435c15e07678ffc9	0x9f83b08d90eeda539f7e2797fed3f6996917bba8	0	0xa22cb46500000000000000000000000000000000000111abe46ff893f3b2fdf1f759a8a80000000000000000000000000000000000000000000000000000000000000001	16112648	0xa11a11554a9e0409db7a0699c4ed2a78f8107fbee236cf2d28f2f4554ffde2ba
67682	0x14a9c79ee69300427268a42ed42ffdfa0a932d284ad0970b542f282fe1fe7535	0xcc93d572c81e3742759005ab7356a8f4e11738e8	0x37c997b35c619c21323f3518b9357914e8b99525	0	0x095ea7b3000000000000000000000000c9256e6e85ad7ac18cd9bd665327fc2062703628ffffffffffffffffffffffffffffffffffffffffffffffffffffffffffffffff	16112648	0xa11a11554a9e0409db7a0699c4ed2a78f8107fbee236cf2d28f2f4554ffde2ba
67683	0xed7d9b59e4251da8bf060e987495cf3ad7ee1b1d711962c10cbb051c0804bbe9	0x46340b20830761efd32832a74d7169b29feb9758	0xa0b73e1ff0b80914ab6fe0444e65848c4c34450b	0	0xa9059cbb000000000000000000000000b3c4fea7d870352981fd8262d37794f01680b1a90000000000000000000000000000000000000000000000000000005750c627af	16112648	0xa11a11554a9e0409db7a0699c4ed2a78f8107fbee236cf2d28f2f4554ffde2ba
67684	0x1a7bf8fb540995dc36c7d6665473375184fb070d21826da19cae3c0ed08f6ad1	0xc86a944e0526894a1a1f8ac01a80fc9a54bf5042	0x83e6f1e41cdd28eaceb20cb649155049fac3d5aa	0	0xa9059cbb00000000000000000000000028c6c06298d514db089934071355e5743bf21d6000000000000000000000000000000000000000000000070814455530eef00000	16112648	0xa11a11554a9e0409db7a0699c4ed2a78f8107fbee236cf2d28f2f4554ffde2ba
67686	0xfb0b4c2effbd580b410dd9b96eb613ac30bb8f4d430bc790270386081e190a0f	0x4976a4a02f38326660d17bf34b431dc6e2eb2327	0xbe82c69dd62b2d33a1909e0065a706e5657100e7	5.17e+16	0x	16112648	0xa11a11554a9e0409db7a0699c4ed2a78f8107fbee236cf2d28f2f4554ffde2ba
67688	0xc7aef8323dc0fa9f6a9d9375045e3185a5a2ba2ac55476c2cf3efc08aa8b72b0	0xdfd5293d8e347dfe59e90efd55b2956a1343963d	0x3845badade8e6dff049820680d1f14bd3903a5d0	0	0xa9059cbb000000000000000000000000e4abce76005ebb6aa129144557d1f3862d9017d400000000000000000000000000000000000000000000006df8c12c2d74f87000	16112648	0xa11a11554a9e0409db7a0699c4ed2a78f8107fbee236cf2d28f2f4554ffde2ba
67691	0x9a2f4b3c403a074370341dd89fdeced282c48f6c8bf03cb9cd8faf9d3bb2770c	0x4c05eb80e5203363f847258590379810a56b461a	0x49cf6f5d44e70224e2e23fdcdd2c053f30ada28b	0	0xa22cb4650000000000000000000000001e0049783f008a0085193e00003d00cd54003c710000000000000000000000000000000000000000000000000000000000000001	16112648	0xa11a11554a9e0409db7a0699c4ed2a78f8107fbee236cf2d28f2f4554ffde2ba
67692	0xa2f83056b618f334afd917bcac02e2cd0ee7ffe2282eadd346a994d64ce5f7cc	0x99c60fe146534559fa9d1f6a081f4e6675f5f846	0x007933790a4f00000099e9001629d9fe7775b800	23636	0x700000002e512eda9eebdb43d5eaa956a6754ff7d738fa4bafc45067ee235c75c702e7c08a05e9d49cab78fc5e28b6c5c55a	16112648	0xa11a11554a9e0409db7a0699c4ed2a78f8107fbee236cf2d28f2f4554ffde2ba
67694	0x10f7aebdd86471d0aaa43fc3d75d954eb86fa53c0b13640e6a99d6e9af112579	0xdd848c7231da2c11ab0cb72769bf47e819e0b1fd	0x06450dee7fd2fb8e39061434babcfc05599a6fb8	0	0x9ff054df00000000000000000000000000000000000000000000000000000000000001af	16112648	0xa11a11554a9e0409db7a0699c4ed2a78f8107fbee236cf2d28f2f4554ffde2ba
67695	0xc37a1b06eca6b88f66559631e87047862e638fc75fcbed5acbba2977412748e6	0x68c79634ea9d6ce219347a0fa6a48184cf3ffff0	0xb7be4001bff2c5f4a61dd2435e4c9a19d8d12343	0	0xa22cb4650000000000000000000000001e0049783f008a0085193e00003d00cd54003c710000000000000000000000000000000000000000000000000000000000000001	16112648	0xa11a11554a9e0409db7a0699c4ed2a78f8107fbee236cf2d28f2f4554ffde2ba
67696	0x4f78af98c30047e251215728ecb00feb9898c34f306ede8880b6e346efde6ca9	0x8c4334952ff5d490a9dce7cfd58b82f6ea0af6d4	0x3ab16af1315dc6c95f83cbf522fecf98d00fd9ba	0	0x853828b6	16112648	0xa11a11554a9e0409db7a0699c4ed2a78f8107fbee236cf2d28f2f4554ffde2ba
67697	0x85b56f5ec34a55b11979a299b31587d551a6424e6ec5ba559ed7fa3cb30369df	0x7237bfa349e208ba4eb0cbe7beda2d3505e261bd	0x06450dee7fd2fb8e39061434babcfc05599a6fb8	0	0x9ff054df0000000000000000000000000000000000000000000000000000000000000030	16112648	0xa11a11554a9e0409db7a0699c4ed2a78f8107fbee236cf2d28f2f4554ffde2ba
67698	0x9a5bc01b3251f3eb857f306526b856c4704adb823f676db2f7d6b714a4cf7dac	0x03ca42e2e7349ddce6813703d051fe42ce136172	0x68b3465833fb72a70ecdf485e0e4c7bd8665fc45	4e+17	0x5ae401dc00000000000000000000000000000000000000000000000000000000638cd20f00000000000000000000000000000000000000000000000000000000000000400000000000000000000000000000000000000000000000000000000000000001000000000000000000000000000000000000000000000000000000000000002000000000000000000000000000000000000000000000000000000000000000e4472b43f3000000000000000000000000000000000000000000000000058d15e176280…	16112648	0xa11a11554a9e0409db7a0699c4ed2a78f8107fbee236cf2d28f2f4554ffde2ba
67699	0x2a5c2c33caeceb2c74bfc108ffceaead07b95461e9e7dd5f44fb72ce04142021	0xbaf892b1bba6e94a3ea2dccb24616bae22678551	0xc6dca8e9c9eb5a7eb68b04a69e63352d5d98695c	0	0xa22cb4650000000000000000000000001e0049783f008a0085193e00003d00cd54003c710000000000000000000000000000000000000000000000000000000000000001	16112648	0xa11a11554a9e0409db7a0699c4ed2a78f8107fbee236cf2d28f2f4554ffde2ba
67701	0x13385b410eab1e8576cc9aacd365f0db8d678bae39dfb32b400fc9f13dae778f	0x3feea8d80c68f9e08b60bc6f431bd6490e2ca7af	0xdac17f958d2ee523a2206206994597c13d831ec7	0	0x23b872dd000000000000000000000000f3b528b0b61767c9d07125a376bcbff99876f95d00000000000000000000000052bb8ad37c991d21e824b510299997eba9fa2b7c0000000000000000000000000000000000000000000000000000000000000000	16112648	0xa11a11554a9e0409db7a0699c4ed2a78f8107fbee236cf2d28f2f4554ffde2ba
67702	0x452f0d6bfe4399cabf7fecb071d7ced6446ed8e6294d328607ef91512f726d97	0xd5fbda4c79f38920159fe5f22df9655fde292d47	0xdac17f958d2ee523a2206206994597c13d831ec7	0	0xa9059cbb00000000000000000000000019fb2b1475d0b492c05acc5735dbe8d12e4a2d8100000000000000000000000000000000000000000000000000000000313ecfc5	16112648	0xa11a11554a9e0409db7a0699c4ed2a78f8107fbee236cf2d28f2f4554ffde2ba
67704	0x793cccbe8198f39d0c0893cb032dc890a0e114744dd573d65bf728de8201bf1f	0xaf456696c3805cbe8a703813c9a6938cb93ff7d4	0x6b6274a2942c3cd24104de8b21c7e63cb7fae47a	0	0x	16112648	0xa11a11554a9e0409db7a0699c4ed2a78f8107fbee236cf2d28f2f4554ffde2ba
67706	0x88ca52766e7a1943f4138e4a47de67a34ff8753f7438e52f0b2f8c9276e3517f	0xe509aa4bfa411bee4c5078bb306d48df4f9eff68	0x9251dec8df720c2adf3b6f46d968107cbbadf4d4	0	0xba41b0c600000000000000000000000000000000000000000000000000000000000000010000000000000000000000000000000000000000000000000000000000000040000000000000000000000000000000000000000000000000000000000000000872607bae01b39e489603cb1c6f63d8478e623e08893ebf48fa7b16d15d628e3f281b8e52214522f016eebe1ba96f371111ab09954c9bd8a19ec4e13214766483a00af00b16b7a3beac08d465ad6b514df4d8bbfc621c631cc5532ee64bfeff28ff155…	16112648	0xa11a11554a9e0409db7a0699c4ed2a78f8107fbee236cf2d28f2f4554ffde2ba
67708	0x0d79bd3f21f9898e55cedcab38abb8cc0edad9e43f14d09ca80a9e2efa5f0373	0x46340b20830761efd32832a74d7169b29feb9758	0x3afc9207bea1b00dfd140b4aa7c7c3c89fda9c4e	1.5e+18	0x	16112648	0xa11a11554a9e0409db7a0699c4ed2a78f8107fbee236cf2d28f2f4554ffde2ba
67710	0x3f470b60d2b7a9aadc575f9994c766d68ee2d91b3920c3170ee1b1844b9d9318	0x973835efd9f120d29370c4e19fd4f9c4ba21eff9	0x68b3465833fb72a70ecdf485e0e4c7bd8665fc45	0	0x5ae401dc00000000000000000000000000000000000000000000000000000000638cd21b000000000000000000000000000000000000000000000000000000000000004000000000000000000000000000000000000000000000000000000000000000020000000000000000000000000000000000000000000000000000000000000040000000000000000000000000000000000000000000000000000000000000016000000000000000000000000000000000000000000000000000000000000000e4472b4…	16112648	0xa11a11554a9e0409db7a0699c4ed2a78f8107fbee236cf2d28f2f4554ffde2ba
67711	0xce2136843b167657220be1f720cb2e3439dc809707dfcea6b80a7647bbe13518	0x232d6c90e52054fc5da194eb1009ec1c8e83eef8	0xf3184789813042eb8bf35a7f09c3e5cf001e260c	0	0x	16112648	0xa11a11554a9e0409db7a0699c4ed2a78f8107fbee236cf2d28f2f4554ffde2ba
67712	0x210b53807fdbcb23b57df6ba787af4e963b710190c3068e3c7f9848f7d6fb560	0xccbdbbfd0f686ece6239fcbefc41b5ce4fe53baf	0x76f4eed9fe41262669d0250b2a97db79712ad855	1.4e+19	0xf17a454600000000000000000000000000000000000000000000000000000000000000c000000000000000000000000000000000000000000000000000000000000001a0000000000000000000000000000000000000000000000000c249fdd32777f060000000000000000000000000000000000000000000000000c1b4c70c1ee6f06c0000000000000000000000001d64fb0ffa8362b2e1ee7ee03929159551eab26e000000000000000000000000000000000000000000000000000000000000022000000…	16112648	0xa11a11554a9e0409db7a0699c4ed2a78f8107fbee236cf2d28f2f4554ffde2ba
67713	0xbd5213d514988f42ac96ee969d838055133e430409efc6a740f2c8598c0ce134	0xded9497f11119f12bd82986d2ec71d80c074e5b7	0x331438345811dd4fcb75f307074efbcc9e4f378a	6.97e+17	0x	16112648	0xa11a11554a9e0409db7a0699c4ed2a78f8107fbee236cf2d28f2f4554ffde2ba
67714	0x6233b9fa9470d96f5dcbc0d9e58154a3b3d274aab91a10c9e28bdf23025cfebb	0x9d96b0561be0440ebe93e79fe06a23bbe8270f90	0x924302d434e7825a09cac67332f51105fa22731c	5.01e+16	0x	16112648	0xa11a11554a9e0409db7a0699c4ed2a78f8107fbee236cf2d28f2f4554ffde2ba
67718	0x5e6199b719e7cec629be9f6b63eec8f29ea853aad36966661412b670e91a1d57	0x71d71c80dbf16ff3d92a935a449842383ae53fa3	0x68b3465833fb72a70ecdf485e0e4c7bd8665fc45	0	0x5ae401dc00000000000000000000000000000000000000000000000000000000638cd21b000000000000000000000000000000000000000000000000000000000000004000000000000000000000000000000000000000000000000000000000000000020000000000000000000000000000000000000000000000000000000000000040000000000000000000000000000000000000000000000000000000000000016000000000000000000000000000000000000000000000000000000000000000e4472b4…	16112648	0xa11a11554a9e0409db7a0699c4ed2a78f8107fbee236cf2d28f2f4554ffde2ba
67719	0x29c397cb80ade34661d153a01470bc7a7e731abd598483fc771c7d3bf3469895	0xabea91569e9a81ebd0517b6e0f6b4bb774cb4264	0xd26f66576c548a43e2f5bd848e829e199e38aed6	2380000000000000	0x	16112648	0xa11a11554a9e0409db7a0699c4ed2a78f8107fbee236cf2d28f2f4554ffde2ba
67720	0x24afdf290d3d546459d066b10f4696a9b10309852320e8c5e027d45cf348a1f0	0x28c6c06298d514db089934071355e5743bf21d60	0xb7f06e99af3920034a5141155201e7752f0a3872	1.01e+18	0x	16112648	0xa11a11554a9e0409db7a0699c4ed2a78f8107fbee236cf2d28f2f4554ffde2ba
67721	0x10dc5943048c20988a27f4ddcd129854595f986e0ef7b7291af79bd73ca643b8	0x6b17ade1d195677c4157813446744bd2da6f94a2	0x06450dee7fd2fb8e39061434babcfc05599a6fb8	0	0x9ff054df00000000000000000000000000000000000000000000000000000000000001af	16112648	0xa11a11554a9e0409db7a0699c4ed2a78f8107fbee236cf2d28f2f4554ffde2ba
67722	0xa442eaaaf7f93052f45649563ab7c0090a9d24f4ed070fc949b65beff1a22e6d	0xde11ff93c4f283ae30824aedbfd02463ab73a8d7	0x00000000006c3852cbef3e08e8df289169ede581	0	0xfd9f1e10000000000000000000000000000000000000000000000000000000000000002000000000000000000000000000000000000000000000000000000000000000010000000000000000000000000000000000000000000000000000000000000020000000000000000000000000de11ff93c4f283ae30824aedbfd02463ab73a8d7000000000000000000000000004c00500000ad104d7dbd00e3ae0a5c00560c00000000000000000000000000000000000000000000000000000000000000016000000…	16112648	0xa11a11554a9e0409db7a0699c4ed2a78f8107fbee236cf2d28f2f4554ffde2ba
67723	0x516f9e238dee604ef20b5bec1f4b2155f0072047a6f148c6cff6ccc2491b81cc	0xd0545d0706313263d4c903b1e6fbf47713e2996f	0xdac17f958d2ee523a2206206994597c13d831ec7	0	0xa9059cbb0000000000000000000000005178d9eaee211209c40f6c53018ac70317ef8f31000000000000000000000000000000000000000000000000000000000587667e	16112648	0xa11a11554a9e0409db7a0699c4ed2a78f8107fbee236cf2d28f2f4554ffde2ba
67725	0x43b14db2eac01f11ce1d2c7335d5b864c2d708616d521385ba1361e5c11b381d	0xc86a944e0526894a1a1f8ac01a80fc9a54bf5042	0x0258f474786ddfd37abce6df6bbb1dd5dfc4434a	0	0xa9059cbb00000000000000000000000028c6c06298d514db089934071355e5743bf21d600000000000000000000000000000000000000000000000000000000bed8bc380	16112648	0xa11a11554a9e0409db7a0699c4ed2a78f8107fbee236cf2d28f2f4554ffde2ba
67727	0xd599900a10c5bde74463dbd8f5b05c361b57896dfd2f1c2fa775006cc3f5647c	0x6bf7d5a4fe2020f8afdd248b7a859c755fbaaead	0x51e70dbffec3903a5a80382d52e1351312b1c7be	2850000000000000	0x	16112648	0xa11a11554a9e0409db7a0699c4ed2a78f8107fbee236cf2d28f2f4554ffde2ba
67728	0x6be0fb91b90a7bf6c2365f4933778fd31d31d4160a82600a62a0cdc8f04b73c2	0x9cab74f24f8b88a0c4b43c891b5c9db9660e8bb7	0xb5a3ebb5aa7d48b8599367bc163876b892270cf8	3.96e+17	0x	16112648	0xa11a11554a9e0409db7a0699c4ed2a78f8107fbee236cf2d28f2f4554ffde2ba
67732	0x3a68f3795f6a41446d3f32c17d0cbb7252a25725eb974a7ccc0ff652a939cbbd	0x56eddb7aa87536c09ccc2793473599fd21a8b17f	0x08fec8f697f1ffdd1fce51ff900acf34971cda5c	3.92e+16	0x	16112648	0xa11a11554a9e0409db7a0699c4ed2a78f8107fbee236cf2d28f2f4554ffde2ba
67735	0x4878dee1f685fb217d150e043597e9b86d5592c5f41b84dbad7e5b3c683cfa73	0x21a31ee1afc51d94c2efccaa2092ad1028285549	0xc33cb88558568f4294fa1994dee3635f29475200	9.42e+16	0x	16112648	0xa11a11554a9e0409db7a0699c4ed2a78f8107fbee236cf2d28f2f4554ffde2ba
67736	0xfdffb41484324449f384bc6a2ce59b06958769828f1d8242a4031579191a7c27	0x99c60fe146534559fa9d1f6a081f4e6675f5f846	0x007933790a4f00000099e9001629d9fe7775b800	23312	0x6b0000002e512eda9eecdb43d5eaa956a6754ff7d738fa4bafc45067ee23	16112648	0xa11a11554a9e0409db7a0699c4ed2a78f8107fbee236cf2d28f2f4554ffde2ba
67738	0x43d935f1808e244062c7a9c241e2aaad15b48e61c7157837e73db6c025617266	0x67e958424038d478880aba6c6c50b4d6687ad691	0x06450dee7fd2fb8e39061434babcfc05599a6fb8	0	0x9ff054df000000000000000000000000000000000000000000000000000000000000000e	16112648	0xa11a11554a9e0409db7a0699c4ed2a78f8107fbee236cf2d28f2f4554ffde2ba
67739	0x61abd23fa87db454e89814a5ec5575f70dbe288040f470cbc5450b12bed0ca8a	0xa4cfca09d930c6634f074ca6bea7ec69c0625037	0x881d40237659c251811cec9c364ef91dc08d300c	0	0x5f5755290000000000000000000000000000000000000000000000000000000000000080000000000000000000000000dac17f958d2ee523a2206206994597c13d831ec70000000000000000000000000000000000000000000000000000000003edd86200000000000000000000000000000000000000000000000000000000000000c000000000000000000000000000000000000000000000000000000000000000136f6e65496e6368563446656544796e616d69630000000000000000000000000000000…	16112648	0xa11a11554a9e0409db7a0699c4ed2a78f8107fbee236cf2d28f2f4554ffde2ba
67743	0x96802534d6748afd9dc27cb0592ade9137f3a497f58edaf9f15fefd161fcd324	0x276bbf5a9713b7cd5a8e245f8e3e51fa8d3e9551	0x6c83833b1cbf893480dc4beb7ef98ac6e9f10e28	1500000000000000	0x	16112648	0xa11a11554a9e0409db7a0699c4ed2a78f8107fbee236cf2d28f2f4554ffde2ba
67745	0x35278c52021c8379fc99abaabfe810ee57c4c989fae64f3c2ae06c3ca73a1e5d	0x8b99ec0ed9dc89d98dbdadb7557864b297801226	0x6bb204870617784397da68e46aefa49ebfda5a85	0	0x98a6e993000000000000000000000000000000000000000000000000000000000000004000000000000000000000000000000000000000000000000000000000000001e00000000000000000000000008b99ec0ed9dc89d98dbdadb7557864b29780122600000000000000000000000000000000000000000000000000000000000000000000000000000000000000000000000000000000000000000000000000000000000000000000000000000000000000000000000000000000000000000000000000000…	16112648	0xa11a11554a9e0409db7a0699c4ed2a78f8107fbee236cf2d28f2f4554ffde2ba
67746	0x224f335e562665dd5d536ad28950c6cfd58b6318ce224c84f4693bcb03cdf1af	0x7a458e9efa2fcd012c5d2420e1a86c3b96adcccf	0xc0ed373644397a6c5c9913aa25967f9db1276dd7	0	0x	16112648	0xa11a11554a9e0409db7a0699c4ed2a78f8107fbee236cf2d28f2f4554ffde2ba
67747	0x2c958085887555829f3db78cb2fac79496fed70e3dc05dba7af5c1700eb5d55d	0x1b9b31b6f2ab65e70a3d4fa7150add08ca55b91c	0x881d40237659c251811cec9c364ef91dc08d300c	0	0x5f5755290000000000000000000000000000000000000000000000000000000000000080000000000000000000000000dac17f958d2ee523a2206206994597c13d831ec7000000000000000000000000000000000000000000000000000000000145bc5100000000000000000000000000000000000000000000000000000000000000c000000000000000000000000000000000000000000000000000000000000000136f6e65496e6368563446656544796e616d69630000000000000000000000000000000…	16112648	0xa11a11554a9e0409db7a0699c4ed2a78f8107fbee236cf2d28f2f4554ffde2ba
67748	0x7996c2e6023db90af01dd3a673c2156ad894949981ed0af8edadfce5975fa857	0xb8d40c0b000fdd5b28f355b80e5ad019e2361ec1	0x73aedb2ca1d38e6ab0639f49bd3b70161c77ad51	0	0x	16112648	0xa11a11554a9e0409db7a0699c4ed2a78f8107fbee236cf2d28f2f4554ffde2ba
67749	0x16e04e765a60a2d4992332b34da888a2908cb2e399fefe3e3e557e0728234cc5	0x6dfc34609a05bc22319fa4cce1d1e2929548c0d7	0xdac17f958d2ee523a2206206994597c13d831ec7	0	0x23b872dd000000000000000000000000035246b162807211eeb561bc773fc886e52c82610000000000000000000000006dfc34609a05bc22319fa4cce1d1e2929548c0d70000000000000000000000000000000000000000000000000000000005a357b5	16112648	0xa11a11554a9e0409db7a0699c4ed2a78f8107fbee236cf2d28f2f4554ffde2ba
67750	0x2b32eaedad477b78495582ba38253fda58a7844052a3189e1eb3d50ae2ad9836	0x43099ac87ef54047a4c8c14e61278ce158905fed	0x5e9d30d57248acbd7fe7732a256677d5cfadf41d	4.98e+17	0x	16112648	0xa11a11554a9e0409db7a0699c4ed2a78f8107fbee236cf2d28f2f4554ffde2ba
67751	0x27b6ecd9c771abe35ad8106803ae04bf14c44953d3de81ecf42ee04325145a1b	0x21a31ee1afc51d94c2efccaa2092ad1028285549	0xdac17f958d2ee523a2206206994597c13d831ec7	0	0xa9059cbb00000000000000000000000092b29821171a7dc3961dcb716e3a07cc205e4d83000000000000000000000000000000000000000000000000000000001dcd6500	16112648	0xa11a11554a9e0409db7a0699c4ed2a78f8107fbee236cf2d28f2f4554ffde2ba
67755	0x5cfe3126043803de34278d1b208df44f667c845a27fa13eff880713d5d21d076	0x940a93344fb7d658fedd9db54daaffd6cb52f481	0xc6ea19e012b232755ee1aeec533e503b7a74ba90	0	0x1cff79cd000000000000000000000000b744474bdd7226736aca4ba87593e32d8315e5c900000000000000000000000000000000000000000000000000000000000000400000000000000000000000000000000000000000000000000000000000000984389f87ff000000000000000000000000000000000000000000000000000000000000002000000000000000000000000000000000000000000000000000000000000009400000000000000000000000000000000000000000000000000000000000000…	16112647	0x1daa380adef0711c5e03ecc8a5039592e3c999d56752ae1c037790469b1856dc
67757	0x85963da56efdae3a1c66c9555dbd40a1b23ceb2264f75db3097b9507798d8fcd	0x9430801ebaf509ad49202aabc5f5bc6fd8a3daf8	0x23d468a32ae2e247c24612870c43966d7d3fc9b9	2e+16	0x	16112647	0x1daa380adef0711c5e03ecc8a5039592e3c999d56752ae1c037790469b1856dc
67759	0xfbbe8ebb879899b2aa42aeb9e67412f4943e28fe0d54e46d11b218298cc74a7f	0x89e51fa8ca5d66cd220baed62ed01e8951aa7c40	0xa24787320ede4cc19d800bf87b41ab9539c4da9d	0	0xc658695c000000000000000000000000dac17f958d2ee523a2206206994597c13d831ec7000000000000000000000000da59e33896b21e5f9a748eeb97954c336b8b7a7f000000000000000000000000c73e02877e607ffd55b0d7ff4a7446bcbdfd7146000000000000000000000000000000000000000000000000000000f6e2ad19f000000000000000000000000000000000000000000000000000000000000000a0000000000000000000000000000000000000000000000000000000000000000000000…	16112647	0x1daa380adef0711c5e03ecc8a5039592e3c999d56752ae1c037790469b1856dc
67760	0x338178965ca676444cc4ebae4e7937087201d982072f457fcde96571aa0dbb64	0xffec0067f5a79cff07527f63d83dd5462ccf8ba4	0x514910771af9ca656af840dff83e8264ecf986ca	0	0xa9059cbb000000000000000000000000cd58adb3a191516c45a10843e971530c4e5001b2000000000000000000000000000000000000000000000000fe542836ea33d000	16112647	0x1daa380adef0711c5e03ecc8a5039592e3c999d56752ae1c037790469b1856dc
67761	0x991e3d9b2cb576a685dfab29406dc40ea5ba306ffb766e3f01ce5ffc103e6589	0x6149a51a0ab0ca12786fe3af59e80c8d6e4d1247	0xd9e1ce17f2641f24ae83637ab66a2cca9c378b9f	0	0x38ed17390000000000000000000000000000000000000000000000000000000005f5e100000000000000000000000000000000000000000000000080442251472bea072f00000000000000000000000000000000000000000000000000000000000000a00000000000000000000000006149a51a0ab0ca12786fe3af59e80c8d6e4d124700000000000000000000000000000000000000000000000000000000638cd1d3000000000000000000000000000000000000000000000000000000000000000300000…	16112647	0x1daa380adef0711c5e03ecc8a5039592e3c999d56752ae1c037790469b1856dc
67762	0x5d5c1f6b1de6e7e3086bb6f86d5edb0c0abcf369ce48277acd068f89562e9de1	0xc59ae75576e60624fafc4f3dd1a384f0a2fc8141	0x9faea6cc43270c5a3bdc4d9fca6c3cbc795a476e	2.41e+17	0x	16112647	0x1daa380adef0711c5e03ecc8a5039592e3c999d56752ae1c037790469b1856dc
67763	0x9994f494a370bc0f5c334f248888f2cb3dc01bcfd4d60e9d8c71e46af0b6a644	0x94ed67ba714f66fca7ce230fd63ee9d4a4fb6325	0x52de8d3febd3a06d3c627f59d56e6892b80dcf12	1	0xb6b4af05000000000000000000000000000000000000000000000000000000003ecef2f000000000000000000000000000000000000000000000000000000002ceade35200000000000000000000000000000000000000000000000000000000638cd2d85d1ad4fcd2897aabd85e2b6e9afe96e749e4eabc9a2b110a6d72914157f1b88f65d3094b29a31b3c86487160bc4930986f3a95c8b342146121df587693de9a81000000000000000000000000000000000000000000000000000000000000001b9d7a8…	16112647	0x1daa380adef0711c5e03ecc8a5039592e3c999d56752ae1c037790469b1856dc
67764	0xab92bb1f817c1b79bbe0b1a780baa690572e34b95a8cf88ccaee252c66686ea7	0x54a423869cc5957600e8c9fa6aa41ce214888888	0x6614e521c65b02bf77c9edfe0c4c05e1a10e6baf	0	0x42842e0e00000000000000000000000054a423869cc5957600e8c9fa6aa41ce21488888800000000000000000000000008536139853760869b4c03d926c88d7dd5eae21800000000000000000000000000000000000000000000000000000000000000a6360c6ebe	16112647	0x1daa380adef0711c5e03ecc8a5039592e3c999d56752ae1c037790469b1856dc
67765	0x662b15c6daadf54d3fc2da635ab7a8080b8dbe1d058057cee494a5525a4fc29e	0xb287eac48ab21c5fb1d3723830d60b4c797555b0	0x19b90155dec57c900b6ac2e9a8f9bb209b0a7267	7.9e+16	0x	16112647	0x1daa380adef0711c5e03ecc8a5039592e3c999d56752ae1c037790469b1856dc
67766	0x5447e8c2cede894fe8c76228fa46625c7283c3692eff7d6f3e8623c3e47637f8	0xe1b3c92c1c83e7e2ccc946fe926045c932c67d5e	0x7492e30d60d96c58ed0f0dc2fe536098c620c4c0	0	0xefef39a10000000000000000000000000000000000000000000000000000000000000001	16112647	0x1daa380adef0711c5e03ecc8a5039592e3c999d56752ae1c037790469b1856dc
67767	0x00d9dfcff0618f81db38a8d529457dcfd938ea8d5be892c9f6968e99562a5f7d	0xb18b794966d9764d41acf9d35f1fea6fdf300461	0x58da52ec0ac02d8a898662aba96285dc1690136d	2e+16	0x	16112647	0x1daa380adef0711c5e03ecc8a5039592e3c999d56752ae1c037790469b1856dc
67768	0x473533caf4a66e0e8447cdcee228c6e2d7810db5606b379cfb5787f318c36fa2	0xe2ca3167b89b8cf680d63b06e8aeefc5e4ebe907	0xe8c060f8052e07423f71d445277c61ac5138a2e5	0	0x00638ccb1f64fe7aff6f4f1b0d9f65767e96573e6df8b1ff59202002f232da000000000000000000000000000000000000000000021a593ba22aac67eea51d0059d1e836f7b7210a978b25a855085cc46fd090b5	16112647	0x1daa380adef0711c5e03ecc8a5039592e3c999d56752ae1c037790469b1856dc
67769	0x1be877468ec3e91f76ce1fa4afae9c9978fc8c5452f23ab7aaabb580afbc7cba	0x747dbfbcfb74fd5fc115896c758a2fdff581c702	0x283af0b28c62c092c9727f1ee09c02ca627eb7f5	0	0xf14fcbc8c1b06e2160cca1afbb45e07557458a64cc84540c3041b8b5ab57e8d9ec6f77cf	16112647	0x1daa380adef0711c5e03ecc8a5039592e3c999d56752ae1c037790469b1856dc
67770	0x0628b1761f56ac691cf590679a388e724ebcdc1050b77a89285ba635022f9e88	0x6a5dbf2fb5206ec8192620810c3edb6d5e62b188	0x1111111254eeb25477b68fb85ed929f73a960582	0	0xe449022e000000000000000000000000000000000000000000000000000000012a523d400000000000000000000000000000000000000000000000000000000129efa58d000000000000000000000000000000000000000000000000000000000000006000000000000000000000000000000000000000000000000000000000000000010000000000000000000000003416cf6c708da44db2624d63ea0aaef7113527c6e26b9977	16112647	0x1daa380adef0711c5e03ecc8a5039592e3c999d56752ae1c037790469b1856dc
67771	0x7e8fbd8213652524c7b6fe2cc5cb6cf497e6101c9515fe2e8cba292279f81757	0x2fb8e9fe1ad2764687aaa1806290a1c178446def	0x68b3465833fb72a70ecdf485e0e4c7bd8665fc45	0	0x5ae401dc00000000000000000000000000000000000000000000000000000000638cd203000000000000000000000000000000000000000000000000000000000000004000000000000000000000000000000000000000000000000000000000000000020000000000000000000000000000000000000000000000000000000000000040000000000000000000000000000000000000000000000000000000000000016000000000000000000000000000000000000000000000000000000000000000e4472b4…	16112647	0x1daa380adef0711c5e03ecc8a5039592e3c999d56752ae1c037790469b1856dc
67772	0x6157506cfbbc8931638cd0340247844deb03bdc00289a0d47b12aa3585079ce9	0xb02f1329d6a6acef07a763258f8509c2847a0a3e	0xdac17f958d2ee523a2206206994597c13d831ec7	0	0xa9059cbb000000000000000000000000090b6b926683afe79c6c9c842c185a573d920bbf0000000000000000000000000000000000000000000000000000000001c9c380	16112647	0x1daa380adef0711c5e03ecc8a5039592e3c999d56752ae1c037790469b1856dc
67773	0x142e37984b3610cae3841674d1ceac7b65e421a4816208ea3e16998efd6a335a	0xee845948e6806d12e966137caa07d49bbe632fe3	0x77fba179c79de5b7653f68b5039af940ada60ce0	0	0xa9059cbb00000000000000000000000028c6c06298d514db089934071355e5743bf21d6000000000000000000000000000000000000000000000003632a425ac382ff000	16112647	0x1daa380adef0711c5e03ecc8a5039592e3c999d56752ae1c037790469b1856dc
67774	0x7962a6684063e3c90bf87e4c453460955fa7f1d2e8112e321c03f244008bed10	0x09aa7bd101451c9e1d99764dbb4846cb08cdbc02	0xb8eb17b59f7a230551ee00bf000bbf8bb9805f49	4950000000000000	0x	16112647	0x1daa380adef0711c5e03ecc8a5039592e3c999d56752ae1c037790469b1856dc
67777	0xdd532ceef3edbd18b267a642b7ce57459181d4f141290a2c867a511f1f02fcd9	0x463d200acb7e92af8e891be3c338157225232528	0x00000000006c3852cbef3e08e8df289169ede581	1.23e+17	0xfb0f3ee1000000000000000000000000000000000000000000000000000000000000002000000000000000000000000000000000000000000000000000000000000000000000000000000000000000000000000000000000000000000000000000000000000000000000000000000000000000000000000000000000019435c27b51f0000000000000000000000000005cc0624e0fb060dbb9bd9963aa9dbaa0aaa2031e000000000000000000000000004c00500000ad104d7dbd00e3ae0a5c00560c0000000…	16112647	0x1daa380adef0711c5e03ecc8a5039592e3c999d56752ae1c037790469b1856dc
67782	0x09f75d7b88cdca0025a5b5f4d6930a4f9cb6f8b99befa14bbd0c096538e5c8b7	0x2dfbd26290e62774bea0edac02bf621c7feef0dd	0x7492e30d60d96c58ed0f0dc2fe536098c620c4c0	0	0xefef39a10000000000000000000000000000000000000000000000000000000000000001	16112647	0x1daa380adef0711c5e03ecc8a5039592e3c999d56752ae1c037790469b1856dc
67784	0x7612611472576fa7e1440a2e6215d6ffce286dd3775b81e533e8a205dadd5cd7	0x8fed7621d0c4eb2f5f2098a4dc58c0e3d5279945	0xc02aaa39b223fe8d0a0e5c4f27ead9083c756cc2	0	0x2e1a7d4d00000000000000000000000000000000000000000000000001bfa45519b30000	16112647	0x1daa380adef0711c5e03ecc8a5039592e3c999d56752ae1c037790469b1856dc
67787	0x9eed5a0d1f8677e384da8f698f3f5fd30dc56a5bc10ec7e14c61955c38e00494	0xf2f5c73fa04406b1995e397b55c24ab1f3ea726c	0xd4e96ef8eee8678dbff4d535e033ed1a4f7605b7	4.42e+16	0x	16112647	0x1daa380adef0711c5e03ecc8a5039592e3c999d56752ae1c037790469b1856dc
67788	0x89af7a0d5860acbdf241defac384f675a5e1d26f1c9d35600453a59721c2a01f	0xd7c358434d82046616e9a15045f6e36583ea6069	0x00000000006c3852cbef3e08e8df289169ede581	2.19e+16	0xed98a57400000000000000000000000000000000000000000000000000000000000000a0000000000000000000000000000000000000000000000000000000000000164000000000000000000000000000000000000000000000000000000000000018600000007b02230091a7ed01230072f7006a004d60a8d4e71d599b8104250f00000000000000000000000000000000000000000000000000000000000000000004000000000000000000000000000000000000000000000000000000000000000400000…	16112647	0x1daa380adef0711c5e03ecc8a5039592e3c999d56752ae1c037790469b1856dc
67789	0xc310da0f2a8a41fe10c61923fe208ea30ed331479a3371e4c54401dbc579a2ff	0xaad6b0fd37818d33995f243c2e01f680c9798108	0xcda72070e455bb31c7690a170224ce43623d0b6f	0	0x798bac8d000000000000000000000000c6f8c79fa957a3ad4b19dc80aff3708f9839e9ba000000000000000000000000000000000000000000000000000000000000000800000000000000000000000000000000000000000000000003782dace9d90000	16112647	0x1daa380adef0711c5e03ecc8a5039592e3c999d56752ae1c037790469b1856dc
67790	0xef2faedc91ae4e169f6ca74372e081665ff4f88ded1ab67fdc84039ba15eb6dd	0xcc9557f04633d82fb6a1741dcec96986cd8689ae	0xab19e71899fba167a6a2a66da3443c0bf2e5ff75	1370000000000000	0x	16112647	0x1daa380adef0711c5e03ecc8a5039592e3c999d56752ae1c037790469b1856dc
67792	0x7d06eba772e2090a17e29794c56fc4fb976753a08acc26be66722e55d84eedfb	0xa299c04eb002e667bcb6c0d38a024eb5022a5e1a	0xf6f19f1ac31c663f590a8446b0bd880c71928ead	879000000000000	0x	16112647	0x1daa380adef0711c5e03ecc8a5039592e3c999d56752ae1c037790469b1856dc
67795	0x9c22313577eb766c4afa8fb9b902fab08f0c9f3e5534dccd630674fe735f638e	0x87519cc682a1f0777aff376f54873da82b7f1d89	0x7492e30d60d96c58ed0f0dc2fe536098c620c4c0	0	0xefef39a10000000000000000000000000000000000000000000000000000000000000001	16112647	0x1daa380adef0711c5e03ecc8a5039592e3c999d56752ae1c037790469b1856dc
67798	0x8c0f98fddf5b6bcca63f90b03c6633a9b5f25b29fe48aeeea8291a36cf04f91a	0xd0c096ac82eba8d7a26f96ffc34b4e3bba3a1122	0xdac17f958d2ee523a2206206994597c13d831ec7	0	0xa9059cbb000000000000000000000000d50821edacaaf0fe839fa587c6da28205cf2cea5000000000000000000000000000000000000000000000000000000001dcd6500	16112647	0x1daa380adef0711c5e03ecc8a5039592e3c999d56752ae1c037790469b1856dc
67799	0x7bf7869c9fa3e17d3cf358606c375c4e112763b26f6e591836a1b4472594ed49	0xf1725c64817fb4c019adcd6c2bce7717c7779ab7	0x3e4e335a32ba61ae6939edd1020a48fc0a25f509	3000000000000000	0x	16112647	0x1daa380adef0711c5e03ecc8a5039592e3c999d56752ae1c037790469b1856dc
67800	0xc8b09ef6e5489c13b49fcd7c13efe50f3b2c25bbc09213e5788633a9529249ed	0xae2d4617c862309a3d75a0ffb358c7a5009c673f	0xa0b86991c6218b36c1d19d4a2e9eb0ce3606eb48	0	0xa9059cbb0000000000000000000000002a07499bc6442254228167992b75328b4a406bde0000000000000000000000000000000000000000000000000000000d841625b0	16112647	0x1daa380adef0711c5e03ecc8a5039592e3c999d56752ae1c037790469b1856dc
67801	0x9ca5ec95664b9db3c000243a192fd9fd8e12a16125b3eb3b83b7884078c4704b	0x3743b1de0d79d7a20440b9c9efec1925b76e222c	0x1b9baf2a3edea91ee431f02d449a1044d5726669	0	0xa9059cbb00000000000000000000000077b8e3c4c56be40f030829117258a8253da1b8f000000000000000000000000000000000000000000aa35204f0ca667160300000	16112647	0x1daa380adef0711c5e03ecc8a5039592e3c999d56752ae1c037790469b1856dc
67803	0x8fec57a6a990deb0d0293d50daa73970c5307cbff0ebea43b53186d17f6077f2	0xe2ca3167b89b8cf680d63b06e8aeefc5e4ebe907	0xe8c060f8052e07423f71d445277c61ac5138a2e5	0	0x01638ccb1f64fe7aff6f4f1b0d9f65767e96573e6df8b1ff592020033b6983000000000000000000000000000000000000000000021a593ba22aac67eea51d0159d1e836f7b7210a978b25a855085cc46fd090b5	16112647	0x1daa380adef0711c5e03ecc8a5039592e3c999d56752ae1c037790469b1856dc
67804	0x765de93802ca1cc8e3d0c3ee04845ad7a97e231ac07fc1b9211a0790385a9359	0x8695484d8842036fca74e3b52d5eddae0b6da679	0x5845e5f0571427d0ce33550587961262ca8cdf5c	0	0x42842e0e0000000000000000000000008695484d8842036fca74e3b52d5eddae0b6da679000000000000000000000000a88125fdd9b6b8bdad9449861b9b79db9feab865000000000000000000000000000000000000000000000000000000000000183f360c6ebe	16112647	0x1daa380adef0711c5e03ecc8a5039592e3c999d56752ae1c037790469b1856dc
67809	0x3fd4882e3d263b212ec270c8c1086d61d4cf60633f9e68b8fc0e52314c01d991	0x0906e75be92d865d74a42b7b24f73ff5fff93ed6	0x68b3465833fb72a70ecdf485e0e4c7bd8665fc45	0	0x5ae401dc00000000000000000000000000000000000000000000000000000000638cd20f0000000000000000000000000000000000000000000000000000000000000040000000000000000000000000000000000000000000000000000000000000000100000000000000000000000000000000000000000000000000000000000000200000000000000000000000000000000000000000000000000000000000000124b858183f0000000000000000000000000000000000000000000000000000000000000…	16112647	0x1daa380adef0711c5e03ecc8a5039592e3c999d56752ae1c037790469b1856dc
67812	0x341e9a928a90a2e7e1f238d33c9aa805685115fbbd2334740095de0705004500	0xf8153c62ed1b6ff2b0f4f053a8e75484a7c6eede	0x476c5e26a75bd202a9683ffd34359c0cc15be0ff	0	0xa9059cbb000000000000000000000000f29f568f971c043df7079a3121e9de616b8998a30000000000000000000000000000000000000000000000000000000253ed5fbd	16112647	0x1daa380adef0711c5e03ecc8a5039592e3c999d56752ae1c037790469b1856dc
67815	0x4f3c0b9ed4184429f56d777a8d6c53bedda693cd6ee471d7b826d431644d293b	0x74bcdd2f3a6a91bd34fe6749b8b522f9ecde2e3a	0x76f4eed9fe41262669d0250b2a97db79712ad855	0	0xf17a454600000000000000000000000000000000000000000000000000000000000000c000000000000000000000000000000000000000000000000000000000000001a000000000000000000000000000000000000000000000000000000002540be40000000000000000000000000000000000000000000000000000000002524220800000000000000000000000001d64fb0ffa8362b2e1ee7ee03929159551eab26e000000000000000000000000000000000000000000000000000000000000022000000…	16112647	0x1daa380adef0711c5e03ecc8a5039592e3c999d56752ae1c037790469b1856dc
67817	0xccd1d8e10e74f973b89f0e4dd29b0650d61d7aefa5db2bdf2098e598a6a49ce6	0x0ad2b0ce20510a3c13d341cbff49b18585a9d173	0x00000000006c3852cbef3e08e8df289169ede581	9000000000000000	0xed98a57400000000000000000000000000000000000000000000000000000000000000a00000000000000000000000000000000000000000000000000000000000000a000000000000000000000000000000000000000000000000000000000000000b200000007b02230091a7ed01230072f7006a004d60a8d4e71d599b8104250f00000000000000000000000000000000000000000000000000000000000000000002000000000000000000000000000000000000000000000000000000000000000200000…	16112647	0x1daa380adef0711c5e03ecc8a5039592e3c999d56752ae1c037790469b1856dc
67818	0x844c6a8663b29233a1656ba201079c7a2d41e1746a889d1dddfc81fe25c1d02c	0x356a61a2fbdecae55e609549c173939bb6009837	0x3db9a3e249fba320e39e8c9efda9c3ac9debdcbc	3e+17	0x	16112647	0x1daa380adef0711c5e03ecc8a5039592e3c999d56752ae1c037790469b1856dc
67822	0xf4a7263935b4b23252b5eab25d4513392b751d7f48957890ee5ccc7819c075d5	0x463e5b673d1029989c9b059d36393c539bef9094	0xb7f886a89ed92dee98d2bb7a8e76839b50c2a5d1	5.99e+17	0x	16112647	0x1daa380adef0711c5e03ecc8a5039592e3c999d56752ae1c037790469b1856dc
67823	0xabaaa3e9f847788e07b5c138dadcd330aa83814c18045d23934a08580c8f52a0	0x3feea8d80c68f9e08b60bc6f431bd6490e2ca7af	0xdac17f958d2ee523a2206206994597c13d831ec7	0	0x23b872dd000000000000000000000000faf6de3ca1ce9685e45164edadd230c15923acb6000000000000000000000000d2decbe8bc2c811a15b7e733ce0b6f7008ce4c8f0000000000000000000000000000000000000000000000000000000000000000	16112647	0x1daa380adef0711c5e03ecc8a5039592e3c999d56752ae1c037790469b1856dc
67824	0x017fbef6cca2672bfd27bc311c5654cc11aca8ace69c6c2b2fc36db953f249c7	0xda7de4a782098167377f1f5c3370bda10856db02	0x6f922284798de645e8bc1040450d32bde963c992	0	0xf2c298be00000000000000000000000000000000000000000000000000000000000000200000000000000000000000000000000000000000000000000000000000000044307830323036636232336139366238616365633231323833626430353938383164616366396631306130353465393461633166613866666534333435333034643938646100000000000000000000000000000000000000000000000000000000	16112647	0x1daa380adef0711c5e03ecc8a5039592e3c999d56752ae1c037790469b1856dc
67825	0xf37934e761d72ed0dd9fa579597ed65720f55651fa7378dd9786f2522610ce0f	0xb0f5dbfe6a2da9705450c402a698583a3a4e2046	0xf89d7b9c864f589bbf53a82105107622b35eaa40	7.97e+16	0x	16112647	0x1daa380adef0711c5e03ecc8a5039592e3c999d56752ae1c037790469b1856dc
67830	0x4fcc01d6b5085d5e2763bcba53db5f483c0e8579c013c2dfa061ade9d8f3c9ae	0x340f4dffb3148a7817f58e993edc743de4eb2e57	0x00000000006c3852cbef3e08e8df289169ede581	0	0xfb0f3ee1000000000000000000000000000000000000000000000000000000000000002000000000000000000000000034d85c9cdeb23fa97cb08333b511ac86e1c4e25800000000000000000000000000000000000000000000000000000000000026a40000000000000000000000000000000000000000000000000000000000000001000000000000000000000000010825d3d6f4e0911f2c66c18cb934431b33f6db000000000000000000000000004c00500000ad104d7dbd00e3ae0a5c00560c0000000…	16112647	0x1daa380adef0711c5e03ecc8a5039592e3c999d56752ae1c037790469b1856dc
67832	0xc3928d2550e0488dff1de9ab70dde09ad43d4a4e12390682e12c688f318e99ca	0x4a6d79d597def30c2fec41544c256d6498a1fa3b	0x06450dee7fd2fb8e39061434babcfc05599a6fb8	0	0x9ff054df00000000000000000000000000000000000000000000000000000000000001af	16112647	0x1daa380adef0711c5e03ecc8a5039592e3c999d56752ae1c037790469b1856dc
67834	0xad40022bfe482f27dfb9d0883de1e6258f3d08a30e7f983834ef61474c5b30b8	0xc9ec550bea1c64d779124b23a26292cc223327b6	0x9008d19f58aabd9ed0d60971565aa8510560ab41	0	0x13d79a0b000000000000000000000000000000000000000000000000000000000000008000000000000000000000000000000000000000000000000000000000000000e0000000000000000000000000000000000000000000000000000000000000014000000000000000000000000000000000000000000000000000000000000003600000000000000000000000000000000000000000000000000000000000000002000000000000000000000000ae78736cd615f374d3085123a210448e74fc639300000…	16112647	0x1daa380adef0711c5e03ecc8a5039592e3c999d56752ae1c037790469b1856dc
67837	0x13c694ae82b37f6defc8d8f62236e9421cbcfb614260c22a3867cb3d0dea6f89	0x8bdeeb0f31e7133f82c468070bd91be1e9a0c44a	0xff1f2b4adb9df6fc8eafecdcbf96a2b351680455	3.94e+16	0x7ff48afb0000000000000000000000000000000000000000000000000000000000000000000000000000000000000000000000000000000000000000008be7e6bf4140000000000000000000000000008bdeeb0f31e7133f82c468070bd91be1e9a0c44a0000000000000000000000000000000000000000000000000000000000000000	16112647	0x1daa380adef0711c5e03ecc8a5039592e3c999d56752ae1c037790469b1856dc
67838	0xa35ace8c9ce15b2e0358cdfe0b8e4ea74877b53c37051dd8e642d301b3be10f9	0x3c85b0d5fdbb60dd607f29499ceb7189d4793495	0x4a220e6096b25eadb88358cb44068a3248254675	0	0xa9059cbb00000000000000000000000008e03d24e6b773f4733814e2815278fcd1982479000000000000000000000000000000000000000000000000002386f26fc10000	16112647	0x1daa380adef0711c5e03ecc8a5039592e3c999d56752ae1c037790469b1856dc
67839	0x42beed683b81fda6c1e99dca907f8b15c663a1451a29f21e7cc8544d5b8faede	0xec723f3f7f5cbf2d4f236f316b387ed47844717f	0x3506424f91fd33084466f402d5d97f05f8e3b4af	0	0xa9059cbb00000000000000000000000028c6c06298d514db089934071355e5743bf21d60000000000000000000000000000000000000000000001fc3842bd1f071c00000	16112647	0x1daa380adef0711c5e03ecc8a5039592e3c999d56752ae1c037790469b1856dc
67846	0x8f348351cb07835fb9bb4ec58a3b9f1ee26e47378f0687b67657eac569796873	0xa192cec8616b62529dd97656d779d778ede49de5	0x76f4eed9fe41262669d0250b2a97db79712ad855	6.97e+17	0xf17a454600000000000000000000000000000000000000000000000000000000000000c000000000000000000000000000000000000000000000000000000000000001a0000000000000000000000000000000000000000000000000000000003476cc9d0000000000000000000000000000000000000000000000000000000033f07dc40000000000000000000000001d64fb0ffa8362b2e1ee7ee03929159551eab26e000000000000000000000000000000000000000000000000000000000000022000000…	16112647	0x1daa380adef0711c5e03ecc8a5039592e3c999d56752ae1c037790469b1856dc
67849	0xe631697e696a8a68840499c650836667dc4e48b82503ce1040074605c6662c2b	0xa65683328f9dfd1ffb5f838dd09ce93065932099	0xff1f2b4adb9df6fc8eafecdcbf96a2b351680455	3.55e+16	0x7ff48afb0000000000000000000000000000000000000000000000000000000000000000000000000000000000000000000000000000000000000000007e03c6ee2ee000000000000000000000000000a65683328f9dfd1ffb5f838dd09ce930659320990000000000000000000000000000000000000000000000000000000000000000	16112647	0x1daa380adef0711c5e03ecc8a5039592e3c999d56752ae1c037790469b1856dc
67850	0x6c15bca85ab6b4a4b56b56182b2a898bf76f2bed7904a89bf6cd057c95f33e3b	0xffcf9020799b4f03a63e11260e8c2e75ceb5c505	0x881d40237659c251811cec9c364ef91dc08d300c	0	0x5f57552900000000000000000000000000000000000000000000000000000000000000800000000000000000000000002b591e99afe9f32eaa6214f7b7629768c40eeb390000000000000000000000000000000000000000000000000000015d3ef7980000000000000000000000000000000000000000000000000000000000000000c000000000000000000000000000000000000000000000000000000000000000136f6e65496e6368563446656544796e616d69630000000000000000000000000000000…	16112647	0x1daa380adef0711c5e03ecc8a5039592e3c999d56752ae1c037790469b1856dc
67851	0x2326dc2e0ff6b0802922882dee979d64f564a158e95e1adde9b3423c9001f285	0xe8463a6d371581d3e40315dad7dbab85f1492da8	0x5a54fe5234e811466d5366846283323c954310b2	0	0xb8f8bad400000000000000000000000000000000000000000000000000000000000000650000000000000000000000000000000000000000000000000000000271d949010000000000000000000000000000000000000000000000000000000251ac802c	16112647	0x1daa380adef0711c5e03ecc8a5039592e3c999d56752ae1c037790469b1856dc
67853	0xcc62e4723683d80211ef9229b7b64e37e903b237fed694b6fa99325585d7bdba	0xc1d76129ed7f6d25c17f7ccb7367d1e6577c720f	0xee00bad5c80f779186403fd290bd65256d39978c	410000000000000	0x	16112647	0x1daa380adef0711c5e03ecc8a5039592e3c999d56752ae1c037790469b1856dc
67855	0xeec6c36ecdbb5562d84e930c75b65dad0a2adc7b1c8b2c1edc5c91ac5afe968a	0x6767526a362ec6c6b1df185478e4f01506b73ff3	0x1f573d6fb3f13d689ff844b4ce37794d79a7ff1c	0	0xa9059cbb00000000000000000000000028c6c06298d514db089934071355e5743bf21d600000000000000000000000000000000000000000000001f090894c3d72200000	16112647	0x1daa380adef0711c5e03ecc8a5039592e3c999d56752ae1c037790469b1856dc
67857	0x900780f491bdf470cce8bae03ffa7d6f3d1dbb30d06dd70690d1381bea76390a	0x9e1f19a5c551e84e523810426a24ed4032902476	0x18aaa7115705e8be94bffebde57af9bfc265b998	0	0xa9059cbb00000000000000000000000028c6c06298d514db089934071355e5743bf21d6000000000000000000000000000000000000000000000152ba7d609bf9dbc0000	16112647	0x1daa380adef0711c5e03ecc8a5039592e3c999d56752ae1c037790469b1856dc
67858	0x38ba7b0eb3f46611b83da488e9bbb5e561a0085c87457313761ab28fb62d2220	0x672aa2d12d80e73a8d82ef53636a1fc0fbbff470	0x50d1c9771902476076ecfc8b2a83ad6b9355a4c9	0	0xa9059cbb00000000000000000000000028c6c06298d514db089934071355e5743bf21d60000000000000000000000000000000000000000000000010591493bfbe197000	16112647	0x1daa380adef0711c5e03ecc8a5039592e3c999d56752ae1c037790469b1856dc
67859	0x24c1416dbb444950b15f3e29dd3436f274bfb31a0800d35f71c37fa841d44aff	0xa8a5b4e535268a91d330a1b26e11030831eed35f	0x2eb1e29fb6078b0eaf3cfff2b6361f702011ebb6	0	0x2e7ba6ef0000000000000000000000000000000000000000000000000000000000002b8c000000000000000000000000a8a5b4e535268a91d330a1b26e11030831eed35f0000000000000000000000000000000000000000000000013465315f6b58e0000000000000000000000000000000000000000000000000000000000000000080000000000000000000000000000000000000000000000000000000000000000ea45860ff2bb399863e15d5d4e3b2398514b3ac68d584a3476e3c3ec293f759ab630d8…	16112647	0x1daa380adef0711c5e03ecc8a5039592e3c999d56752ae1c037790469b1856dc
67861	0x602ab521b1cb4058c6e3f58863fc46af764373e748cfdf0517384864fddeb3ef	0xa299c04eb002e667bcb6c0d38a024eb5022a5e1a	0x5d973afeeced98bed236f010eab73ed63f33b392	463000000000000	0x	16112647	0x1daa380adef0711c5e03ecc8a5039592e3c999d56752ae1c037790469b1856dc
67863	0xc1bbebf749cf8a98462ac9e402c0d15ddf056b3838e0201bf189bb9376dc9e3a	0xc3107a3e11db270042d42fd39948217273ebdcdb	0x68b3465833fb72a70ecdf485e0e4c7bd8665fc45	2.21e+16	0x5ae401dc00000000000000000000000000000000000000000000000000000000638cd20f000000000000000000000000000000000000000000000000000000000000004000000000000000000000000000000000000000000000000000000000000000020000000000000000000000000000000000000000000000000000000000000040000000000000000000000000000000000000000000000000000000000000016000000000000000000000000000000000000000000000000000000000000000e442712…	16112647	0x1daa380adef0711c5e03ecc8a5039592e3c999d56752ae1c037790469b1856dc
67865	0xdcc30a384a08e44b7ec30d3ce17f04892cdf146988f5bb4716b0fbaba2895e2e	0x80fe5d04717efa75acc207bc214df6d86de9f6fe	0x58e5bf4ab9bc4d8f4032cf03a32d87528c4e182c	2.11e+16	0x	16112647	0x1daa380adef0711c5e03ecc8a5039592e3c999d56752ae1c037790469b1856dc
67867	0x843fe0b29eda6db59914e37e832be06b3ad13e07821634522c5b9dddb4b96455	0x07b873de48807ec7b02b38cc31b4f96a6a507182	0xa77d09743f77052950c4eb4e6547e9665299becd	0	0xa6417ed600000000000000000000000000000000000000000000000000000000000000000000000000000000000000000000000000000000000000000000000000000003000000000000000000000000000000000000000000000032e8d14c2186d21a410000000000000000000000000000000000000000000000000000000000000064	16112647	0x1daa380adef0711c5e03ecc8a5039592e3c999d56752ae1c037790469b1856dc
67869	0xaa5b2da662a8a88f34f7dafb1c74f52073519aa4953335f837b28caf95924e69	0x81a8136606eeb6c6bd4f635c1230d424ed6877ee	0x68b3465833fb72a70ecdf485e0e4c7bd8665fc45	2e+16	0x5ae401dc00000000000000000000000000000000000000000000000000000000638cd20f00000000000000000000000000000000000000000000000000000000000000400000000000000000000000000000000000000000000000000000000000000001000000000000000000000000000000000000000000000000000000000000002000000000000000000000000000000000000000000000000000000000000000e4472b43f300000000000000000000000000000000000000000000000000472d54c9f38…	16112647	0x1daa380adef0711c5e03ecc8a5039592e3c999d56752ae1c037790469b1856dc
67870	0xd378c9e26bb492e5887686fd5303897816880e00e05a8adb3685899d8959e19f	0x7d411c4279a96069fe32de0c0eab4a964e8ed9c4	0x1a5e7543c7d5fe456e977b794b79fe31d65ba377	567000000000000	0x	16112647	0x1daa380adef0711c5e03ecc8a5039592e3c999d56752ae1c037790469b1856dc
67871	0x1d8e4838384be5961d565a4ec3e6f7e6326b0e1c4b60491ef5353a66f179c260	0x010f4d0502fa66b785271de4d9040a6b4225cc18	0x44e2dd9d8c5f08e13db97e8425dbd82cb0dd1ef4	0	0xc562288a000000000000000000000000000000000000000000000000000000000000002000000000000000000000000000000000000000000000000000000000000001600000000000000000000000000000000000000000000000005b7aaa914413f800000000000000000000000000a7f5bbbf3be2172c9e2b6b18f48a39b3ef4d610f000000000000000000000000c02aaa39b223fe8d0a0e5c4f27ead9083c756cc2000000000000000000000000ae7ab96520de3a18e5e111b5eaab095312d7fe8400000…	16112647	0x1daa380adef0711c5e03ecc8a5039592e3c999d56752ae1c037790469b1856dc
67873	0x739d164b7ca9e1f6fa6f11e55cf2c7229b66e5932cfcad462e6770b8d2d8ad8b	0x3d6deaf9aa395ab6187d552c74a4e7ef19475ea3	0x9fdeed6ba0aba7a0ea0455c31ccad166b4b62e1b	4.45e+16	0x	16112647	0x1daa380adef0711c5e03ecc8a5039592e3c999d56752ae1c037790469b1856dc
67874	0x2deb9f2afed1d699ad5c1e65d43b9aa35caa246a6602751160512da83026934f	0x5b5b7c48d8c5b181ca6af8e0ec38ec9df6ebf4d2	0xf89d7b9c864f589bbf53a82105107622b35eaa40	7.97e+16	0x	16112647	0x1daa380adef0711c5e03ecc8a5039592e3c999d56752ae1c037790469b1856dc
67876	0x42c98d6b90c4f3ae8559460285fd6bafff5bd4b04b22fe905d0cf8f31dc05b59	0xd2f9b6e6851a0d2baac956545c842902894580aa	0xf89d7b9c864f589bbf53a82105107622b35eaa40	7.97e+16	0x	16112647	0x1daa380adef0711c5e03ecc8a5039592e3c999d56752ae1c037790469b1856dc
67878	0x768132f3ea81ae4a612b5c5d8d3c0ae43853fef2ac1173779e3f55fd2d0fbe49	0x9447a8416cef8e40b9c2cdf0cada0bd56f145dd8	0x292f04a44506c2fd49bac032e1ca148c35a478c8	3.77e+16	0x	16112646	0xf5206556388826ccbe22f63c80b50c2fafdea94b886c047cd750f69c965d1ca0
67879	0x32932d79ca8f2155a2128906a4184a0f3e0de48576e9bfc2ef047141ce768104	0x7830c87c02e56aff27fa8ab1241711331fa86f43	0xa9d1e08c7793af67e9d92fe308d5697fb81d3e43	0	0xca350aa60000000000000000000000000000000000000000000000000000000000000040000000000000000000000000000000000000000000000000000000000003d090000000000000000000000000000000000000000000000000000000000000000c000000000000000000000000a0b86991c6218b36c1d19d4a2e9eb0ce3606eb480000000000000000000000009425b51e18b4b5436bf775d823a5b8c7a18561ff0000000000000000000000000000000000000000000000000000000001312d0000000…	16112646	0xf5206556388826ccbe22f63c80b50c2fafdea94b886c047cd750f69c965d1ca0
67880	0x3cac2d5fa9f5342b1ad61a9466a3fc3f815271ca93a47160a2a9ea383328c726	0x690b9a9e9aa1c9db991c7721a92d351db4fac990	0xebec795c9c8bbd61ffc14a6662944748f299cacf	9.03e+16	0x	16112646	0xf5206556388826ccbe22f63c80b50c2fafdea94b886c047cd750f69c965d1ca0
67881	0x906c1d1b9dcfec73445acde747163c2c10a3be365a247c8671574003af5fbabb	0x71660c4005ba85c37ccec55d0c4493e66fe775d3	0x29d04442a3fc04796cd87f8b561999adef7975d0	8720000000000000	0x	16112646	0xf5206556388826ccbe22f63c80b50c2fafdea94b886c047cd750f69c965d1ca0
67882	0xe1ae348bf081bc892b49cb163a36ace56886acc307930fae538448456fd2a747	0xddfabcdc4d8ffc6d5beaf154f18b778f892a0740	0x610cbaeeec6b9d884f849510ed6f4bb167ed0a51	8720000000000000	0x	16112646	0xf5206556388826ccbe22f63c80b50c2fafdea94b886c047cd750f69c965d1ca0
67883	0xf2a999f44dbf529fc06882aa6f71c33eedc6d1b1e63ad8db0225701908401406	0xe7381c88cdb204cfe575211aac89b5add87d553c	0x883b01205b938ec7268286d13cb40a2045d2e78f	0	0x71d6ddd600000000000000000018160c16d12683e6dba56d8102b85190f33d52b251c170	16112646	0xf5206556388826ccbe22f63c80b50c2fafdea94b886c047cd750f69c965d1ca0
67884	0xc7aa9eedde5bae1ee020bc673aa51b47a047b25f6186066814f389dbdb321046	0x15ece0d7de25436bcfcf3d62a9085ddc7838aee9	0xb6f08fd67408e57f4b54eaf73c88b1c2680ef998	3.7e+16	0x	16112646	0xf5206556388826ccbe22f63c80b50c2fafdea94b886c047cd750f69c965d1ca0
67885	0xcf7c057e7fef4e98b973e2c966a05de5a9af43c10c61483e593301516cd51e1d	0x28c6c06298d514db089934071355e5743bf21d60	0x8ee6e980fa5df8705c65318f881cf192e1d64a1c	9230000000000000	0x	16112646	0xf5206556388826ccbe22f63c80b50c2fafdea94b886c047cd750f69c965d1ca0
67886	0x62049e3bef02a13ced10cc4b2aed5be86a9f4b412f0207c277345bb1400a63a9	0x56eddb7aa87536c09ccc2793473599fd21a8b17f	0xdac17f958d2ee523a2206206994597c13d831ec7	0	0xa9059cbb000000000000000000000000c4dac1042c3d0f425bd3a6e44609e86ef4000cf50000000000000000000000000000000000000000000000000000000053754036	16112646	0xf5206556388826ccbe22f63c80b50c2fafdea94b886c047cd750f69c965d1ca0
67887	0x194760e972ba5fc47a5e6aba06705b8cb777f35662edab297dbbf7e7854e90ba	0xad0c883b01e69d79c7aa23bc1b9fd96b16aa4022	0x99c9fc46f92e8a1c0dec1b1747d010903e884be1	0	0x58a997f6000000000000000000000000a0b86991c6218b36c1d19d4a2e9eb0ce3606eb480000000000000000000000007f5c764cbc14f9669b88837ca1490cca17c31607000000000000000000000000000000000000000000000000000000003938e10b0000000000000000000000000000000000000000000000000000000000030d4000000000000000000000000000000000000000000000000000000000000000a00000000000000000000000000000000000000000000000000000000000000000	16112646	0xf5206556388826ccbe22f63c80b50c2fafdea94b886c047cd750f69c965d1ca0
67888	0x9ad343900a39c54f19bf072c4cf1bc9e31bc29ae56bf1d5d8e035eb7a99b10da	0x1b8340cd980787283c28c1b1c50d84d206c90870	0xdac17f958d2ee523a2206206994597c13d831ec7	0	0xa9059cbb000000000000000000000000ef08c2f3ec9d7dae537f9c35a071d55aa2c81fa1000000000000000000000000000000000000000000000000000000001692c74a	16112646	0xf5206556388826ccbe22f63c80b50c2fafdea94b886c047cd750f69c965d1ca0
67890	0xbacff19ddb7fa21488244fc0205fc48289468025fba8f7dd468a9a63b5ee3b36	0xdfd5293d8e347dfe59e90efd55b2956a1343963d	0x32353a6c91143bfd6c7d363b546e62a9a2489a20	0	0xa9059cbb0000000000000000000000005ef9d31556dd8430d1943f8dda11401977c42abf0000000000000000000000000000000000000000000016d1f3cd988f42b40000	16112646	0xf5206556388826ccbe22f63c80b50c2fafdea94b886c047cd750f69c965d1ca0
67893	0xe0bd6fe7852f3969961a4c6f77232d54b307354f536fd42d48702d3fa239bbee	0xb739d0895772dbb71a89a3754a160269068f0d45	0x0666aeb4144f640c5d1570120671436edabcf601	8720000000000000	0x	16112646	0xf5206556388826ccbe22f63c80b50c2fafdea94b886c047cd750f69c965d1ca0
67896	0xd6c5f5723350a7e9c0babf242f0c12d2454ddd41c1ec566c28f021e5ab241296	0xeb2629a2734e272bcc07bda959863f316f4bd4cf	0x6840ac2bfb26c968d77f4cf0cb71a6508a938a99	8720000000000000	0x	16112646	0xf5206556388826ccbe22f63c80b50c2fafdea94b886c047cd750f69c965d1ca0
67897	0x46013e572dce34cd68827162ead0c49776ed7670fc920b13927304ef1c809303	0xb5d85cbf7cb3ee0d56b3bb207d5fc4b82f43f511	0x1cfbb84de981a6041d64b62121872a9fc6678760	8720000000000000	0x	16112646	0xf5206556388826ccbe22f63c80b50c2fafdea94b886c047cd750f69c965d1ca0
67899	0x64ac057a35fabe7d0f1f4c7ad1df3209fce4715c80dbf69ce06433a6f4dc293a	0x71660c4005ba85c37ccec55d0c4493e66fe775d3	0x9db3ea0c3cac4952caf4cbac7ccf0646c4bf1693	8720000000000000	0x	16112646	0xf5206556388826ccbe22f63c80b50c2fafdea94b886c047cd750f69c965d1ca0
67900	0xe6c7a84868c65042c90c269b1ff6394c928f4d6eb365e248a313ee4fb4e15e46	0x74dec05e5b894b0efec69cdf6316971802a2f9a1	0x2e95e68c4acad8254818d5f0af7c1bf96c082129	4.8e+16	0x	16112646	0xf5206556388826ccbe22f63c80b50c2fafdea94b886c047cd750f69c965d1ca0
67901	0x661ad345b107be4baea28314453bef323ed9f7e7f9abdb51bd1fe8f17947c12d	0xb5d85cbf7cb3ee0d56b3bb207d5fc4b82f43f511	0xf35607d6d117140e4e0ff8553b98f7e915983eed	8720000000000000	0x	16112646	0xf5206556388826ccbe22f63c80b50c2fafdea94b886c047cd750f69c965d1ca0
67902	0xb911b3cb8bca8b8a3f0bef87a76d8f9ed359a573b16a28dcd533f62b856bf20d	0xe50dd092eb23f2aee40f75aaa0e34e2917ee11fb	0xe66b31678d6c16e9ebf358268a790b763c133750	3.33e+16	0x5cf5402600000000000000000000000000000000000000000000000000000000000000c0000000000000000000000000eeeeeeeeeeeeeeeeeeeeeeeeeeeeeeeeeeeeeeee000000000000000000000000eeeeeeeeeeeeeeeeeeeeeeeeeeeeeeeeeeeeeeee0000000000000000000000000000000000000000000000000074f5cc2aff0cc40000000000000000000000007b32e70e8d73ac87c1b342e063528b2930b15ceb00000000000000000000000000000000000000000000000000012e714114ad6100000…	16112646	0xf5206556388826ccbe22f63c80b50c2fafdea94b886c047cd750f69c965d1ca0
67903	0x44c359a04cd081456b2553124265e4e5daffb0072fc7c7c0cc93d2442a633266	0x2845633f9cd219b43be29cae1ad4b776865e51d0	0x00000000006c3852cbef3e08e8df289169ede581	1.25e+17	0xed98a57400000000000000000000000000000000000000000000000000000000000000a000000000000000000000000000000000000000000000000000000000000010e000000000000000000000000000000000000000000000000000000000000012800000007b02230091a7ed01230072f7006a004d60a8d4e71d599b8104250f00000000000000000000000000000000000000000000000000000000000000000003000000000000000000000000000000000000000000000000000000000000000300000…	16112646	0xf5206556388826ccbe22f63c80b50c2fafdea94b886c047cd750f69c965d1ca0
67904	0xaac4c3978fa21295b52c66028fdbbbe40934b9819c4529ee67505d81d7abad11	0x07b873de48807ec7b02b38cc31b4f96a6a507182	0x883b01205b938ec7268286d13cb40a2045d2e78f	0	0x71d6ddd600000000000000000000cde321cc2b2ac6e969395ef33b3fc79d998ba2396bc8	16112646	0xf5206556388826ccbe22f63c80b50c2fafdea94b886c047cd750f69c965d1ca0
67905	0xccd50549d7eb7fee7de8235c86533a7376bc8774d5d93c3377a564df97c3ae34	0xbb9be0dc46655f8e213b06d4f718c71c3193aeaf	0x2df02a341cbab77343722c1f1409a526f81e8fe5	0	0x	16112646	0xf5206556388826ccbe22f63c80b50c2fafdea94b886c047cd750f69c965d1ca0
67906	0x195a72d580549fc4944c058aad156414a87e79b73680d6a3faae60f3fb0d36ff	0x7c7c63070372f67b49a269940aa6853e1dccf295	0x5e8da8ad4043d21bfdeafbf73cffabe729dc6d08	2000000000000000	0x	16112646	0xf5206556388826ccbe22f63c80b50c2fafdea94b886c047cd750f69c965d1ca0
67907	0x00a6529355d3758afbd9fda74875f06fe82406004ceb7a99272b65589afa8531	0xf9c1e54ef4cc89da7389e0aae2f1c639f577fa25	0xdac17f958d2ee523a2206206994597c13d831ec7	0	0xa9059cbb000000000000000000000000d2b160360fb8ac3a9b6486169b6e36d7dd3e6566000000000000000000000000000000000000000000000000000000001d92a5f0	16112646	0xf5206556388826ccbe22f63c80b50c2fafdea94b886c047cd750f69c965d1ca0
67909	0x85bbd3a85098467f90014523e92395d30d106768138e50bd47ebd985a29f56c1	0x8216874887415e2650d12d53ff53516f04a74fd7	0xa97f14955844028f7c3988340c73094e6a71e3de	9.35e+16	0x	16112646	0xf5206556388826ccbe22f63c80b50c2fafdea94b886c047cd750f69c965d1ca0
67910	0xdc6d0a86e31ccc5250089fa3014c89a5f62bf6317f61a4ee5bcf23e3bda4818f	0xfda6c44d3c3b7902ccb54877fd69dc3c581fc544	0x00000000006c3852cbef3e08e8df289169ede581	0	0xe7acab24000000000000000000000000000000000000000000000000000000000000008000000000000000000000000000000000000000000000000000000000000006600000007b02230091a7ed01230072f7006a004d60a8d4e71d599b8104250f0000000000000000000000000000000000000000000000000000000000000000000000000000000000000000000000000000000000000000000000000000000000a0000000000000000000000000000000000000000000000000000000000000000100000…	16112646	0xf5206556388826ccbe22f63c80b50c2fafdea94b886c047cd750f69c965d1ca0
67911	0x57382bcbcce46a5471cf056db5b39d27f786237619f8ef0a4faa18b49bb66f3e	0x6315d230860c87c5f21e6f6e2aba4378bb853f33	0xff1f2b4adb9df6fc8eafecdcbf96a2b351680455	4.14e+16	0x7ff48afb0000000000000000000000000000000000000000000000000000000000000000000000000000000000000000000000000000000000000000009302e408ce40000000000000000000000000006315d230860c87c5f21e6f6e2aba4378bb853f330000000000000000000000000000000000000000000000000000000000000000	16112646	0xf5206556388826ccbe22f63c80b50c2fafdea94b886c047cd750f69c965d1ca0
67913	0x381a4213220d01fcce61db92c7d182d86f994c661ee5376c37e02a9fe987990a	0x55f089d5f6aedfdacbd5e3acb0e8f31fbab44088	0xdac17f958d2ee523a2206206994597c13d831ec7	0	0xa9059cbb0000000000000000000000006439f5d99c85a66a3de6d2cee73ccc4e2b011aee00000000000000000000000000000000000000000000000000000000cf17e650	16112646	0xf5206556388826ccbe22f63c80b50c2fafdea94b886c047cd750f69c965d1ca0
67914	0x59fd9ecb96387b43f559e82be0f2126fadaf45b18afd474f87b400d6153ba940	0x7be1f3e4ad6a254a1bcd3d9dffa78c2a08f14378	0x881d40237659c251811cec9c364ef91dc08d300c	5e+16	0x5f5755290000000000000000000000000000000000000000000000000000000000000080000000000000000000000000000000000000000000000000000000000000000000000000000000000000000000000000000000000000000000b1a2bc2ec5000000000000000000000000000000000000000000000000000000000000000000c00000000000000000000000000000000000000000000000000000000000000017616972737761704c696768743346656544796e616d696300000000000000000000000…	16112646	0xf5206556388826ccbe22f63c80b50c2fafdea94b886c047cd750f69c965d1ca0
67915	0xb59d117d2e81819af3063960bdbe51dc6294b75b133c20df14b23fa620f2ee1f	0x0824394591f0a9064ab1a749fab766c673e7f36a	0x68b3465833fb72a70ecdf485e0e4c7bd8665fc45	3.56e+16	0x5ae401dc00000000000000000000000000000000000000000000000000000000638cd20300000000000000000000000000000000000000000000000000000000000000400000000000000000000000000000000000000000000000000000000000000001000000000000000000000000000000000000000000000000000000000000002000000000000000000000000000000000000000000000000000000000000000e4472b43f3000000000000000000000000000000000000000000000000007e734f5ddd7…	16112646	0xf5206556388826ccbe22f63c80b50c2fafdea94b886c047cd750f69c965d1ca0
67917	0x94a9731a7d5dc2f9ebfa096c445892b04b4b308a60b1660407afc573479276c6	0x463e5b673d1029989c9b059d36393c539bef9094	0xaf3145e5dfd4623734955c6e397add4204fcbbc2	1.04e+19	0x	16112646	0xf5206556388826ccbe22f63c80b50c2fafdea94b886c047cd750f69c965d1ca0
67918	0x62e3066e742385963d91992eba77c6e7bc196f379853ef3a71730120d41c961e	0x75e89d5979e4f6fba9f97c104c2f0afb3f1dcb88	0x295b42684f90c77da7ea46336001010f2791ec8c	0	0xa9059cbb0000000000000000000000003a87cce27a0dc2bc5246863f476d9f9cc6d15c78000000000000000000000000000000000000000000000474870e247ea2de0000	16112646	0xf5206556388826ccbe22f63c80b50c2fafdea94b886c047cd750f69c965d1ca0
67920	0x3613c06a2d9aaf61a1d72626d01b258a146691525b5388bdcfa3946bf7293fe6	0x6e9d75d5713d6978b31ab30f0ffeda753d3e42fa	0xc02aaa39b223fe8d0a0e5c4f27ead9083c756cc2	0	0xa9059cbb000000000000000000000000e4587a2ece162047a1d06dea6193a7c82873611f0000000000000000000000000000000000000000000000000d8ca5c88c649800	16112646	0xf5206556388826ccbe22f63c80b50c2fafdea94b886c047cd750f69c965d1ca0
67921	0xd9a0e3cbab07744e66a5c072ea0c134656cefeab1a97200ab7f6338fe7921afc	0x89c1c683529d16238b12a08d39385dd10244e49d	0x68b3465833fb72a70ecdf485e0e4c7bd8665fc45	7.2e+17	0x5ae401dc00000000000000000000000000000000000000000000000000000000638cd1eb0000000000000000000000000000000000000000000000000000000000000040000000000000000000000000000000000000000000000000000000000000000100000000000000000000000000000000000000000000000000000000000000200000000000000000000000000000000000000000000000000000000000000124b858183f0000000000000000000000000000000000000000000000000000000000000…	16112646	0xf5206556388826ccbe22f63c80b50c2fafdea94b886c047cd750f69c965d1ca0
67922	0xe28f5fa7f468c25676b1924fabf375df09aaf360451a7bde9508189cb0c4f874	0xe21d837cd1437305632ac1660a94c64b1ecd3151	0x0f51a2a4c6120875d073594610475701d8789ef9	1e+16	0x	16112646	0xf5206556388826ccbe22f63c80b50c2fafdea94b886c047cd750f69c965d1ca0
67924	0x549c0b5aaac13b43037aeeda398a99e1dc30d424354aea73781c3080ef960b45	0x3f239b0eac00dc2f683c19043bf2d377e3a21e3f	0x7a250d5630b4cf539739df2c5dacb4c659f2488d	1e+17	0x7ff36ab50000000000000000000000000000000000000000000000000000003432db1de500000000000000000000000000000000000000000000000000000000000000800000000000000000000000003f239b0eac00dc2f683c19043bf2d377e3a21e3f00000000000000000000000000000000000000000000000000000000638ccb850000000000000000000000000000000000000000000000000000000000000002000000000000000000000000c02aaa39b223fe8d0a0e5c4f27ead9083c756cc200000…	16112646	0xf5206556388826ccbe22f63c80b50c2fafdea94b886c047cd750f69c965d1ca0
67926	0xcbc66a1c026bcf7b59d451bc14ac2c5717d9916c7ada68eee69c084947d647c0	0x888707dd9844fd0a9077217f1468e6004d8a7288	0x779b08a4ef58e8f67ce8bd17741afb26bd040e0a	90800000000000	0x	16112646	0xf5206556388826ccbe22f63c80b50c2fafdea94b886c047cd750f69c965d1ca0
67928	0x49f23a163ae0559f1a0a5a70ab94fae6babbb533b636d4754cd952c41a38c86d	0x3a5b42d8f4c8877ec5c9dd5e4358e964f035959b	0x37cd4e8875e3edaffdfe9be63958f07effbd0bfd	0	0x095ea7b3000000000000000000000000b766b49ea985b6cdafbab1c505918b3b74b319df00000000000000000000000000000000000000000000021dd1182db31e33f2c6	16112646	0xf5206556388826ccbe22f63c80b50c2fafdea94b886c047cd750f69c965d1ca0
67929	0xcb689bc2b923b1339455e94e3d9f254b11eb44bba2218a42569e9f5c238ca5a0	0x58e5bf4ab9bc4d8f4032cf03a32d87528c4e182c	0xa2914c57674849f7b8b9412c5f8b416ec0f950af	4000000000000000	0x	16112646	0xf5206556388826ccbe22f63c80b50c2fafdea94b886c047cd750f69c965d1ca0
67931	0xeb9a1dfa7a15c12f5fbe3f39a7ff8405fc518e5ba79cfa445c834fdebb12a5d5	0x1dba50db333e784892c8532f6457efe814b43a1e	0x68b3465833fb72a70ecdf485e0e4c7bd8665fc45	1e+17	0x5ae401dc00000000000000000000000000000000000000000000000000000000638cd1f700000000000000000000000000000000000000000000000000000000000000400000000000000000000000000000000000000000000000000000000000000001000000000000000000000000000000000000000000000000000000000000002000000000000000000000000000000000000000000000000000000000000000e4472b43f3000000000000000000000000000000000000000000000000016345785d8a0…	16112646	0xf5206556388826ccbe22f63c80b50c2fafdea94b886c047cd750f69c965d1ca0
67932	0x5fbd75d7ef30da6f1bd4bb48e7c2711c65c0ad521c03acd960fabb10681fb9a8	0x3cd751e6b0078be393132286c442345e5dc49699	0xf7ddd0990801be4f67e1e30dc36603e9f3cafdbd	8720000000000000	0x	16112646	0xf5206556388826ccbe22f63c80b50c2fafdea94b886c047cd750f69c965d1ca0
67934	0xaf9ab04361ae2a436bb6162d87afc26a2ed6db7d9c6530294493e6719bcd7790	0x21a31ee1afc51d94c2efccaa2092ad1028285549	0xdac17f958d2ee523a2206206994597c13d831ec7	0	0xa9059cbb00000000000000000000000097fbd715ea1b6addd86fcfbdfe40aa8d21bba9690000000000000000000000000000000000000000000000000000000042ac3360	16112646	0xf5206556388826ccbe22f63c80b50c2fafdea94b886c047cd750f69c965d1ca0
67935	0xa9986913641cb024948cb59c3494ae6c3a54bdd6ea307c1ce3cf644d90d345ee	0x4976a4a02f38326660d17bf34b431dc6e2eb2327	0x3468f46837aa359c3fe4ccca1436eb13af8790a5	1.88e+16	0x	16112646	0xf5206556388826ccbe22f63c80b50c2fafdea94b886c047cd750f69c965d1ca0
67936	0x37b3d2163b9bf06e075f00ee5b3777ef9250a2c413f675840f6c3ba822f2dbaf	0xe68e95e856f0baf44005c7bdde0326a3860e8bdf	0x7492e30d60d96c58ed0f0dc2fe536098c620c4c0	0	0xefef39a10000000000000000000000000000000000000000000000000000000000000001	16112646	0xf5206556388826ccbe22f63c80b50c2fafdea94b886c047cd750f69c965d1ca0
67939	0x06564280d677ffe9b9c8b83d60237303025f3fb452f536d1f1397e9c80ad01a3	0xb5d85cbf7cb3ee0d56b3bb207d5fc4b82f43f511	0x5ddafa9a95c27f84a5f0af3756a87ad4dd7f802f	8720000000000000	0x	16112646	0xf5206556388826ccbe22f63c80b50c2fafdea94b886c047cd750f69c965d1ca0
67940	0x7efb06b68f23e4b3d6e808991edec601712383dec640c29b788d99c12c0ddd90	0x77696bb39917c91a0c3908d577d5e322095425ca	0x278011fb09fe14474dd84d13c8e7bc712b694b90	8720000000000000	0x	16112646	0xf5206556388826ccbe22f63c80b50c2fafdea94b886c047cd750f69c965d1ca0
67942	0xcf46520f780c44bd7bc709cd6aea094631cd8da603d4ad61166e6abbc2447463	0x03191315dd40f2eb91921ea4d3f74daa8ca17f7b	0xfa20f502812236a60020ac7773edea0c2da7247a	1.06e+17	0x	16112646	0xf5206556388826ccbe22f63c80b50c2fafdea94b886c047cd750f69c965d1ca0
67943	0x1d430a1ca1525e8c1c205b0a90d971c2d512f87a22bf7b3439092c6aade17560	0x70eef8914b99a5988a7a81b656beeb5670bc1d14	0xc02aaa39b223fe8d0a0e5c4f27ead9083c756cc2	0	0x2e1a7d4d000000000000000000000000000000000000000000000000005ed023cd717800	16112646	0xf5206556388826ccbe22f63c80b50c2fafdea94b886c047cd750f69c965d1ca0
67944	0x53a327df0e16d83a1a0a54da52489fd21c341b28a120f0ceb715d43358565a04	0x043c9926a67e6f8d3d535e4ea8f891baa019b225	0x9d419112040710cf459155ead982776f23510f07	2.19e+16	0x	16112646	0xf5206556388826ccbe22f63c80b50c2fafdea94b886c047cd750f69c965d1ca0
67946	0x727031530d080027ce028292a797996cdaf12c76eb2086baae6922933f89aacc	0x6dfc34609a05bc22319fa4cce1d1e2929548c0d7	0xdac17f958d2ee523a2206206994597c13d831ec7	0	0xa9059cbb000000000000000000000000b295085493e633da3a3de48334984c976236964c000000000000000000000000000000000000000000000000000000009500d8a6	16112646	0xf5206556388826ccbe22f63c80b50c2fafdea94b886c047cd750f69c965d1ca0
67947	0x5ff1c0ae8f33d2994f83bb535da7ba1a2d6531e843f4c0f390dc087ef9e9bdd0	0x151b381058f91cf871e7ea1ee83c45326f61e96d	0x7acc2887e552db04feb0e3835ff1dfb626e19057	5.68e+16	0x	16112646	0xf5206556388826ccbe22f63c80b50c2fafdea94b886c047cd750f69c965d1ca0
67948	0xf896237da35b1e469bb3b86ee790db9c5eb8f6c92b5df40f1102f44de901681c	0x74dec05e5b894b0efec69cdf6316971802a2f9a1	0xdac17f958d2ee523a2206206994597c13d831ec7	0	0xa9059cbb00000000000000000000000078f71f35f28315ae7357c4f1af757262ddbe809c000000000000000000000000000000000000000000000000000000001267e24d	16112646	0xf5206556388826ccbe22f63c80b50c2fafdea94b886c047cd750f69c965d1ca0
67949	0xec8501876bb8be14d8a457c2d505b356f1e19c8ed9717cb634632702c3a5dfc7	0xcd1c4d52bc5c2a06051a8fa51886a3af4a4af00c	0x68b3465833fb72a70ecdf485e0e4c7bd8665fc45	1.5e+17	0x5ae401dc00000000000000000000000000000000000000000000000000000000638cd20300000000000000000000000000000000000000000000000000000000000000400000000000000000000000000000000000000000000000000000000000000001000000000000000000000000000000000000000000000000000000000000002000000000000000000000000000000000000000000000000000000000000000e4472b43f30000000000000000000000000000000000000000000000000214e8348c4f0…	16112646	0xf5206556388826ccbe22f63c80b50c2fafdea94b886c047cd750f69c965d1ca0
67950	0x8c13fb566247c9785df5b3b828a8c5c055dde89d11824707e45015dc548fe74b	0x48c04ed5691981c42154c6167398f95e8f38a7ff	0x761d38e5ddf6ccf6cf7c55759d5210750b5d60f3	0	0xa9059cbb00000000000000000000000000fa6210f142eec531fba588e98c79d346d3eeda00000000000000000000000000000000000000000149d59a0d583f91c9180000	16112646	0xf5206556388826ccbe22f63c80b50c2fafdea94b886c047cd750f69c965d1ca0
67951	0x754ba46e786fcf04a97d0a287c0e417df8e834dbbbad62492e7dbd48b18bfc15	0xeb2629a2734e272bcc07bda959863f316f4bd4cf	0x57c0abe58977bdfc2c930d7517c6e737aff0f044	8720000000000000	0x	16112646	0xf5206556388826ccbe22f63c80b50c2fafdea94b886c047cd750f69c965d1ca0
67952	0x1a4e5e3642ba8b34ebc893dc23e84dbb16ef7b0305d03c585c694a83ed3f4379	0x230a1ac45690b9ae1176389434610b9526d2f21b	0x2796317b0ff8538f253012862c06787adfb8ceb6	0	0xd57eafac000000000000000000000000ab7e15dca2cf21d49e27812f439ac398dc9b37a80000000000000000000000001b84765de8b7566e4ceaf4d0fd3c5af52d3dde4f000000000000000000000000000000000000000000000223d9fbaab32c60669c000000000000000000000000000000000000000000000001a055690d9db800000000000000000000000000001116898dda4015ed8ddefb84b6e8bc24528af2d8000000000000000000000000000000000000000000000000000000000000000100000…	16112646	0xf5206556388826ccbe22f63c80b50c2fafdea94b886c047cd750f69c965d1ca0
67953	0xc225e5eb08860d71d10f9a150464c8720ead2fa8ce630b1a4784b559d4b17781	0x503828976d22510aad0201ac7ec88293211d23da	0x0710b9524c7f35c69d2bfd20184cd0d3006b6114	8720000000000000	0x	16112646	0xf5206556388826ccbe22f63c80b50c2fafdea94b886c047cd750f69c965d1ca0
67954	0xe3ae2ae1e73b0331b1ab22cf51413d2a4af692fd4615d3c36a03151d71ae618e	0xe2ed0e9ce0794206c549f8c9fb246977e80f0f4b	0xc02aaa39b223fe8d0a0e5c4f27ead9083c756cc2	3.59e+16	0xd0e30db0	16112646	0xf5206556388826ccbe22f63c80b50c2fafdea94b886c047cd750f69c965d1ca0
67959	0x742d10bc511f7ecf3bdfcb58312af1c1b1ca2df91156632dacb208b4ba482bd5	0x7dc69a2fe85c4b3a2b317217caee27e500fc993a	0x000000000000ad05ccc4f10045630fb830b95127	1.31e+18	0x9a1fc3a70000000000000000000000000000000000000000000000000000000000000040000000000000000000000000000000000000000000000000000000000000036000000000000000000000000000000000000000000000000000000000000000e0000000000000000000000000000000000000000000000000000000000000001bf9a4dfde19e787a8eded9436758d70da44dacca21800d2092c1f6087fbe8bf564083a71fb9b1d93abbe20154b9b43faa1f780c24e0e057a53b0ddc828af1b39f00000…	16112646	0xf5206556388826ccbe22f63c80b50c2fafdea94b886c047cd750f69c965d1ca0
67961	0x092285242861a9d72658956734139197c4f4c7079980b194e88ca958576fb2b0	0xcc93d572c81e3742759005ab7356a8f4e11738e8	0x68b3465833fb72a70ecdf485e0e4c7bd8665fc45	6.79e+16	0x5ae401dc00000000000000000000000000000000000000000000000000000000638ccafb000000000000000000000000000000000000000000000000000000000000004000000000000000000000000000000000000000000000000000000000000000020000000000000000000000000000000000000000000000000000000000000040000000000000000000000000000000000000000000000000000000000000016000000000000000000000000000000000000000000000000000000000000000e45023b…	16112646	0xf5206556388826ccbe22f63c80b50c2fafdea94b886c047cd750f69c965d1ca0
67962	0xaad5d148b709b03e3a3a553b083d61335909aa392fb26340a4986af8b1ac7ee1	0xab97925eb84fe0260779f58b7cb08d77dcb1ee2b	0x6988478ae2a946b916b82ef245fe081484918461	8e+16	0x	16112646	0xf5206556388826ccbe22f63c80b50c2fafdea94b886c047cd750f69c965d1ca0
67963	0x513fc24e768940ffec9955e217eae0f29b704ff93d5bbf916e909b02989848d7	0x6ac5755992f781674853e49c6846bebb89afcbc7	0xa0b86991c6218b36c1d19d4a2e9eb0ce3606eb48	0	0x095ea7b3000000000000000000000000f6a94dfd0e6ea9ddfdffe4762ad42365761366130000000000000000000000000000000000000000000000000000000005f5e100	16112646	0xf5206556388826ccbe22f63c80b50c2fafdea94b886c047cd750f69c965d1ca0
67964	0xebc685a7d27f413445974262da174867e465ccbb7ee59ad6e33f8b75bae61204	0x333dbc59c1a7f8b05173d652c320a05495ce8347	0xa698b4de86e27be81f6deb2efaf98b4a010cfd0f	0	0xa22cb4650000000000000000000000001e0049783f008a0085193e00003d00cd54003c710000000000000000000000000000000000000000000000000000000000000001	16112646	0xf5206556388826ccbe22f63c80b50c2fafdea94b886c047cd750f69c965d1ca0
67965	0xbefc25fa0ba564e42b4cf8cab5628f531c30b46622b94c8041ba00670c1d17bf	0x4976a4a02f38326660d17bf34b431dc6e2eb2327	0x33ef89d1e9333f7b0e84bb9b69974f43704eac23	6.42e+16	0x	16112646	0xf5206556388826ccbe22f63c80b50c2fafdea94b886c047cd750f69c965d1ca0
67966	0x18bdd9c37049fe3a3736a9d5517cc52f1665dc966333bb80c9f92cfad4237cbc	0xdfd5293d8e347dfe59e90efd55b2956a1343963d	0x04fa0d235c4abf4bcf4787af4cf447de572ef828	0	0xa9059cbb0000000000000000000000003c5883c650d600bd543a9b5c8d9a3a6f5d16b8f40000000000000000000000000000000000000000000003a1da92f28a9161a000	16112646	0xf5206556388826ccbe22f63c80b50c2fafdea94b886c047cd750f69c965d1ca0
67970	0x07ac281cf8a4c9f7f922cbb9ef06b988a78e50390e31069130b80c9913468a02	0xeb2629a2734e272bcc07bda959863f316f4bd4cf	0xe3f1a9b6a7869ebd6cf5183f9baa1614874c2eb8	8720000000000000	0x	16112646	0xf5206556388826ccbe22f63c80b50c2fafdea94b886c047cd750f69c965d1ca0
67971	0x36b2e043cf9ca98529e409bfd765d4ad00040669dc72ca6dc365e1932276fd2e	0xcd26bad5de6768663e4b404126a7b91403745a7f	0x8290333cef9e6d528dd5618fb97a76f268f3edd4	0	0xa9059cbb00000000000000000000000028c6c06298d514db089934071355e5743bf21d6000000000000000000000000000000000000000000000a968163f0a57b4000000	16112646	0xf5206556388826ccbe22f63c80b50c2fafdea94b886c047cd750f69c965d1ca0
67972	0x0f6df6d5d6bae739e8ff4cce6dc227a18a762868b8e2bbb70601fe1639c31dbd	0xa6f34f5c8787074f2333b58487364b4c398abd56	0xf2e391f11cd1609679d03a1ac965b1d0432a7007	1.82e+17	0xeeb38ab400000000000000000000000000000000000000000000000000000000000000020000000000000000000000000000000000000000000000000000000000002710	16112646	0xf5206556388826ccbe22f63c80b50c2fafdea94b886c047cd750f69c965d1ca0
67973	0x1218aa2a92f445021b9f40d80858a41a4c97ac42824e2e8ef597e8ca91be7f5b	0xf89d7b9c864f589bbf53a82105107622b35eaa40	0xdac17f958d2ee523a2206206994597c13d831ec7	0	0xa9059cbb0000000000000000000000004d9335cb85ef4e3c101967fa44938b3ff030de640000000000000000000000000000000000000000000000000000000110803ea8	16112646	0xf5206556388826ccbe22f63c80b50c2fafdea94b886c047cd750f69c965d1ca0
67974	0x0241e876e86f9fcad114bd04ce4191e994b034c076831c55ed6a21ff749574aa	0xcc97dc4b6488ca9731c98e1bd5656599b08bac91	0x495f947276749ce646f68ac8c248420045cb7b5e	0	0xa22cb4650000000000000000000000001e0049783f008a0085193e00003d00cd54003c710000000000000000000000000000000000000000000000000000000000000000	16112646	0xf5206556388826ccbe22f63c80b50c2fafdea94b886c047cd750f69c965d1ca0
67975	0x8479850d0b33e7deb25d59e0d463e344c6ea7692b9e0d2779b803d79676b79aa	0x9696f59e4d72e237be84ffd425dcad154bf96976	0xc50ee9d845540442db9fdc17ffbe5bbfb867396b	1.11e+16	0x	16112646	0xf5206556388826ccbe22f63c80b50c2fafdea94b886c047cd750f69c965d1ca0
67976	0xe12909194e4832dec82ae6f1be42d7d1220d19082bd1f3ca3d288a98425384b1	0x2dda850b23e24a5eefc5a6018498a6915749925a	0x7492e30d60d96c58ed0f0dc2fe536098c620c4c0	0	0xefef39a10000000000000000000000000000000000000000000000000000000000000001	16112646	0xf5206556388826ccbe22f63c80b50c2fafdea94b886c047cd750f69c965d1ca0
67977	0xa0cc08dbc100f73740bdb5ccf226dc778bc74264e7f089ed81c4bd94674c345f	0xdfd5293d8e347dfe59e90efd55b2956a1343963d	0xa0b86991c6218b36c1d19d4a2e9eb0ce3606eb48	0	0xa9059cbb000000000000000000000000c0e59d7b743c2757c8b39b791b5ebaf2bf6e725d0000000000000000000000000000000000000000000000000000003a34f87000	16112646	0xf5206556388826ccbe22f63c80b50c2fafdea94b886c047cd750f69c965d1ca0
67980	0x87efe5a1c44787ea25b681fef52986a2536ba80b884331772347065a91c3d6e1	0xd2107b993ed7e0ea49b38708368f1ab101bb3cdf	0xbff7d703910a07d66a28a1e22eb9086ef1dd78ec	7.92e+16	0x	16112646	0xf5206556388826ccbe22f63c80b50c2fafdea94b886c047cd750f69c965d1ca0
67981	0x08e1acaf1767fd4637a9271f2df144f20a7ce502c14e94a246989481e9c60d9f	0xb739d0895772dbb71a89a3754a160269068f0d45	0x2d15ce11052aa564570392202aed923994a2e8c1	8720000000000000	0x	16112646	0xf5206556388826ccbe22f63c80b50c2fafdea94b886c047cd750f69c965d1ca0
67983	0x369f45f8bab25b55499323b1e39670ca25ae96b4adef03c597fed8739beaaa4c	0xa05e21550eb86462388783047da318d2de20bbda	0xa0b86991c6218b36c1d19d4a2e9eb0ce3606eb48	0	0xa9059cbb000000000000000000000000f1db5c88ac2b757e8b33f2e58e19cc55b30398980000000000000000000000000000000000000000000000000000000029be631e	16112646	0xf5206556388826ccbe22f63c80b50c2fafdea94b886c047cd750f69c965d1ca0
67984	0x5ff834bdd8d7d032113d877bca8e7bd37478d6e387c10d5aff156baa9a1b361e	0x3cd751e6b0078be393132286c442345e5dc49699	0x9311ec41f35ec0c198dc288c6ddb178b9e8d1603	8720000000000000	0x	16112646	0xf5206556388826ccbe22f63c80b50c2fafdea94b886c047cd750f69c965d1ca0
67985	0x54dc4a0380794617d8d8d1192e290eca5100955275f29b714e13f48f4843445e	0x9696f59e4d72e237be84ffd425dcad154bf96976	0xa5c291264677aa1bd27dbeb1072314bd7f4203e2	2.42e+18	0x	16112646	0xf5206556388826ccbe22f63c80b50c2fafdea94b886c047cd750f69c965d1ca0
67986	0xca66a480cf22d8357a69fbba60cc1e28e1e70642374bdd47ba98d48e30f43757	0x8137ffe5e3ee5d5809280d954ca87a5182420d88	0x7492e30d60d96c58ed0f0dc2fe536098c620c4c0	0	0xefef39a10000000000000000000000000000000000000000000000000000000000000001	16112646	0xf5206556388826ccbe22f63c80b50c2fafdea94b886c047cd750f69c965d1ca0
67988	0x0800ff571bfefe9c3e2953c05f654a0e30d6a52bf6903edd405e914a6957b3db	0xdfd5293d8e347dfe59e90efd55b2956a1343963d	0x3d785c8141c381cb2d82a5cd46163ae6ff425966	1.13e+17	0x	16112646	0xf5206556388826ccbe22f63c80b50c2fafdea94b886c047cd750f69c965d1ca0
67990	0x04d73724e253ddbc690d1898886ccab64c750582c2edf02dd3f2daa1433d72c7	0x4c6767e261b070b1cf1046dd4ec8ea48c6fee1e5	0x47aef04eca8563d91cf9b537a3bf0f9078150ac7	4.6e+17	0x	16112646	0xf5206556388826ccbe22f63c80b50c2fafdea94b886c047cd750f69c965d1ca0
67991	0x077e7222fcb18fa3db8735102c78c404d109c5723de97febf5b9311e19d62a4c	0xb5d85cbf7cb3ee0d56b3bb207d5fc4b82f43f511	0x299babcb6219c59c63fc8576936cb718f86ba9ef	8720000000000000	0x	16112646	0xf5206556388826ccbe22f63c80b50c2fafdea94b886c047cd750f69c965d1ca0
67993	0x71490e5ccfe735cfd6223395123f356d2768f50a2adfef5fbcd1378f2bf99630	0x1b9b31b6f2ab65e70a3d4fa7150add08ca55b91c	0xdac17f958d2ee523a2206206994597c13d831ec7	0	0x095ea7b3000000000000000000000000881d40237659c251811cec9c364ef91dc08d300cffffffffffffffffffffffffffffffffffffffffffffffffffffffffffffffff	16112646	0xf5206556388826ccbe22f63c80b50c2fafdea94b886c047cd750f69c965d1ca0
67995	0xe501488123ec3e3797a0fcc47ef577c2374560504d4ac040c4f95f0167eef9dd	0x71660c4005ba85c37ccec55d0c4493e66fe775d3	0x5f10d6fc12050331a4c03dd70f19ffea45833b20	8720000000000000	0x	16112646	0xf5206556388826ccbe22f63c80b50c2fafdea94b886c047cd750f69c965d1ca0
67997	0xcfb87b0847ac336bec30d4fc74ce4c10fa46a170940df1e843c8adcd240fe7a4	0xddfabcdc4d8ffc6d5beaf154f18b778f892a0740	0x5da903371ae98dd43d742316f8493f6b36f8c7bd	8720000000000000	0x	16112646	0xf5206556388826ccbe22f63c80b50c2fafdea94b886c047cd750f69c965d1ca0
67998	0x901d330d226218a72c22007b4c221de85a7bc3cddaf630e9a8e15aa65c510023	0x56eddb7aa87536c09ccc2793473599fd21a8b17f	0x39d86595684a551e3b2378fb6780274c2642db1e	5.51e+18	0x	16112646	0xf5206556388826ccbe22f63c80b50c2fafdea94b886c047cd750f69c965d1ca0
68001	0xd9bba769e0a4ccefb775035556fc36454e8360b3f513a2a4a102875f2e2e6bd2	0x71660c4005ba85c37ccec55d0c4493e66fe775d3	0xeb1d95047992eaf294a9b937586a66bf63bfa75c	8720000000000000	0x	16112646	0xf5206556388826ccbe22f63c80b50c2fafdea94b886c047cd750f69c965d1ca0
68003	0x8f204f1bbf52607495879b2244213a809921ecc1432c2790ee5665c34254e598	0x077d360f11d220e4d5d831430c81c26c9be7c4a4	0x93585472f6b9f0c9a682eb7209c6296e5d75a8e6	3.9e+16	0x	16112646	0xf5206556388826ccbe22f63c80b50c2fafdea94b886c047cd750f69c965d1ca0
68007	0x5909f19e4d4b1e629ea34f127ea2c4a2c5ebe9ed6b19f8d6a67134b1ec5b68c1	0xee845948e6806d12e966137caa07d49bbe632fe3	0xba11d00c5f74255f56a5e366f4f77f5a186d7f55	0	0xa9059cbb00000000000000000000000028c6c06298d514db089934071355e5743bf21d600000000000000000000000000000000000000000000000a294a3cf1c3fbe4000	16112646	0xf5206556388826ccbe22f63c80b50c2fafdea94b886c047cd750f69c965d1ca0
68008	0x70d3fa4b979c2b41aed5422f504c4e67440f0f532dce3d4ea5e099ba25e6e3e1	0x85b44a83bca937e844bdc290284ef6b11bc015ba	0x66bf36dba79d4606039f04b32946a260bcd3ff52	0	0xe5f13b16000000000000000000000000000000000000000000002d565922cee3609428d5000000000000000000000000000000000000000000000000000000000000000000000000000000000000000085b44a83bca937e844bdc290284ef6b11bc015ba	16112646	0xf5206556388826ccbe22f63c80b50c2fafdea94b886c047cd750f69c965d1ca0
68009	0xdceba6ba0703899509950a1c61786e9cc57f4954a5cdea80d6d65e257d9cb9ed	0x03671b7c11cb749de612bb460cef8bc3f6e6db06	0xf2a0ef4672d76403b90dc7d7dd8d12c4f9d013b3	0	0xcac40eb00000000000000000000000000000000000000000000000000000000000000060000000000000000000000000000000000000000000000000000000000000030000000000000000000000000000000000000000000000000000000000000005a000000000000000000000000000000000000000000000000000000000000000140000000000000000000000000000000000000000000000000000000000000001000000000000000000000000000000000000000000000000000000000000000200000…	16112646	0xf5206556388826ccbe22f63c80b50c2fafdea94b886c047cd750f69c965d1ca0
68010	0x59a65d312ac45e51f31903f3dba578e48909549aadcb9da4ee68c960ba0b551a	0x3c7f16b4cf6f1c2dbef886a0faf53f80c4ea508f	0xa0b86991c6218b36c1d19d4a2e9eb0ce3606eb48	0	0xa9059cbb000000000000000000000000f6c148a5a580765594f9c9417f7334363f927aea000000000000000000000000000000000000000000000000000000003b99169b	16112646	0xf5206556388826ccbe22f63c80b50c2fafdea94b886c047cd750f69c965d1ca0
68011	0x8f0f0185d29729acd973fb5250d1b99c5efc0605ff2e1b7b3f63135a5a2572fa	0x1117977de987153356508c5d9677540968a54e45	0x1718af1613d86e21488a9d985a586ae9c5dbd62e	0	0xcc920aff000000000000000000000000be82b9533ddf0acaddcaa6af38830ff4b919482c	16112646	0xf5206556388826ccbe22f63c80b50c2fafdea94b886c047cd750f69c965d1ca0
68012	0x90a1bbe6f2c254761a3cd23734fc339a7a3c1237139d0a483c35a43c6eb46253	0x9cd3e1145c81b7aeb5190d477471d9a3359ab00e	0x120e3d70b6df098e0bde3ec0c6c82e70b84d70ea	0	0xbd3507da0000000000000000000000000000000000000000000000000000000000000000	16112646	0xf5206556388826ccbe22f63c80b50c2fafdea94b886c047cd750f69c965d1ca0
68013	0xd02e2e53dc6e2646fd2e8dc64530ad9044b3723eb84d2f398c5b7df17abbaf3a	0x5677e9419c19652f4ccea3043027e6c14f9d9c80	0x1bbf25e71ec48b84d773809b4ba55b6f4be946fb	0	0xa9059cbb000000000000000000000000f30330c3e168b63180f14131feada167219133940000000000000000000000000000000000000000000000410d586a20a4c00000	16112646	0xf5206556388826ccbe22f63c80b50c2fafdea94b886c047cd750f69c965d1ca0
68014	0xf506589f3a2e780d7b7e6471d2fb46b7e0e08c1e9e398a17844a675fe7af8bfd	0xf407f3f3900cd9c1f7b5967591c9e415d513a9c0	0xc02aaa39b223fe8d0a0e5c4f27ead9083c756cc2	4.5e+17	0xd0e30db0	16112646	0xf5206556388826ccbe22f63c80b50c2fafdea94b886c047cd750f69c965d1ca0
68015	0xcd31e2c732d5f1dfd36146297954e791eaac952278766051aa9a00b3306c5258	0xab97925eb84fe0260779f58b7cb08d77dcb1ee2b	0xd44cda7534dc0551d263937e57fb874d28bf569b	8e+16	0x	16112646	0xf5206556388826ccbe22f63c80b50c2fafdea94b886c047cd750f69c965d1ca0
68016	0xd7859ce625eb505e0e9108275adc39c6fe934b2b18264b5c6ec3c778c8a51906	0x7c195d981abfdc3ddecd2ca0fed0958430488e34	0x330b88d11362f7e7fe26b9dfbaa19ae5ddf44b7f	8720000000000000	0x	16112646	0xf5206556388826ccbe22f63c80b50c2fafdea94b886c047cd750f69c965d1ca0
68017	0x7e882576e3b4e056d4e829609c0e6643567452c5623ad84750df0dfc4b76d776	0xf11b44abb718d7e2bd71268c6758815f627c9d45	0x73c6a78363d1acad01b3dda0c8ca04c392ccadb5	0	0x095ea7b300000000000000000000000068b3465833fb72a70ecdf485e0e4c7bd8665fc45ffffffffffffffffffffffffffffffffffffffffffffffffffffffffffffffff	16112646	0xf5206556388826ccbe22f63c80b50c2fafdea94b886c047cd750f69c965d1ca0
68018	0x302c0d7de7c7eea6f1678da32cec9792091f6a674abbb8344b7f61395a7f976c	0x8a8539239e3d202a7f37dc8593a00404ae09b285	0xa57d319b3cf3ad0e4d19770f71e63cf847263a0b	0	0x67dfd4c90000000000000000000000000000000000000000000000004540760c592a0562	16112646	0xf5206556388826ccbe22f63c80b50c2fafdea94b886c047cd750f69c965d1ca0
68019	0x81e102839485a7ae73984d9bdcb9127cd7a0efed33ed17945ea4ba31c24954ec	0xcecb8569542c204e69b78fb58a0b85dc479ddd79	0x7492e30d60d96c58ed0f0dc2fe536098c620c4c0	0	0xefef39a10000000000000000000000000000000000000000000000000000000000000001	16112646	0xf5206556388826ccbe22f63c80b50c2fafdea94b886c047cd750f69c965d1ca0
68020	0x7950d14172ed74afa62069223bc87cb5d02cdc4626b66c010d87d7b33087e274	0x292f04a44506c2fd49bac032e1ca148c35a478c8	0x12ef859fec1cef84b9220d9cc4e326c695166a45	1.02e+17	0x	16112646	0xf5206556388826ccbe22f63c80b50c2fafdea94b886c047cd750f69c965d1ca0
68021	0xc7fb93f312309227979fc84dae5d073a0a66fe6ad4dc3e33f68cd78462727d6f	0x7b82b45964d20ee4010917d7fdb20b606032e1af	0x150f94b44927f078737562f0fcf3c95c01cc2376	1.75e+18	0x1114cd2a000000000000000000000000000000000000000000000000000000000000006e0000000000000000000000007b82b45964d20ee4010917d7fdb20b606032e1af00000000000000000000000000000000000000000000000000000000000000a000000000000000000000000000000000000000000000000018493fba64ef0000000000000000000000000000000000000000000000000000182a29a64326200000000000000000000000000000000000000000000000000000000000000000147b82b…	16112646	0xf5206556388826ccbe22f63c80b50c2fafdea94b886c047cd750f69c965d1ca0
68022	0x51550785e4ee001bdd71b830689fec7d0fdd0300a68cbd8cdf3e9e908e040e2f	0x3cd751e6b0078be393132286c442345e5dc49699	0x7d03e5f75954a3d0df06a6e224a1890fac49533b	8720000000000000	0x	16112646	0xf5206556388826ccbe22f63c80b50c2fafdea94b886c047cd750f69c965d1ca0
68023	0xc51d35bb0efdb6245b1427e54968defbb959a327b0feb58db90625d1b6a726bf	0x688e6e7c78d2864ab102232a220c012655777ec0	0xb0d502e938ed5f4df2e681fe6e419ff29631d62b	0	0xe2bbb158000000000000000000000000000000000000000000000000000000000000000000000000000000000000000000000000000000000000000000000000771e83be	16112646	0xf5206556388826ccbe22f63c80b50c2fafdea94b886c047cd750f69c965d1ca0
68024	0x8bc380bcbcf31f641c4d966fbd74d77ed59c84002595417ebf86b8d84ca9b68e	0xb62aed303f62bef1bf9d2ed1aaaf0de853efc424	0x39da41747a83aee658334415666f3ef92dd0d541	8800000000000000	0x9a2b81150000000000000000000000000000000000000000000000000000000000000020000000000000000000000000000000000000000000000000000000000000000100000000000000000000000000000000000000000000000000000000000000200000000000000000000000000000000000000000000000000000000000000004000000000000000000000000000000000000000000000000001f438daa060000000000000000000000000000000000000000000000000000000000000000006000000…	16112646	0xf5206556388826ccbe22f63c80b50c2fafdea94b886c047cd750f69c965d1ca0
68025	0xc9e3425476d6b6b643f48404e1a654d69b8509236885e6213bb1e939964a1db5	0x594ca7df4e39abb9c4caada47b66fd63fc675d2e	0xff1f2b4adb9df6fc8eafecdcbf96a2b351680455	4.14e+16	0x7ff48afb0000000000000000000000000000000000000000000000000000000000000000000000000000000000000000000000000000000000000000009302e408ce4000000000000000000000000000594ca7df4e39abb9c4caada47b66fd63fc675d2e0000000000000000000000000000000000000000000000000000000000000000	16112646	0xf5206556388826ccbe22f63c80b50c2fafdea94b886c047cd750f69c965d1ca0
68027	0x90c5e4a0ebb554a45a578730a37565849ab9f2383668cf373a993e528818923b	0x71660c4005ba85c37ccec55d0c4493e66fe775d3	0x6c4ec16ddc6c0f2388aded4938c0a326cd0d66fe	8720000000000000	0x	16112646	0xf5206556388826ccbe22f63c80b50c2fafdea94b886c047cd750f69c965d1ca0
68028	0xdd3d622183b4ac80cccfb1db14d0e60122fd25391c4aa658b105f413622bc8ae	0x95f7e46689d6ebbd71844bb6d2318d5dc11c88cc	0x3a3243bb6f580d01816eeb73aaab970c654ebb8b	0	0x	16112646	0xf5206556388826ccbe22f63c80b50c2fafdea94b886c047cd750f69c965d1ca0
68029	0x26c38d9ae7898abbb716c6e24f2e3a156690cd1e8ba6fc83decfff6c9fcac6ed	0x77696bb39917c91a0c3908d577d5e322095425ca	0xfa4432b5c1d454cdbf98cc048f9ff236619a5fcb	8720000000000000	0x	16112646	0xf5206556388826ccbe22f63c80b50c2fafdea94b886c047cd750f69c965d1ca0
68032	0xee5c75a0aad302c22454147ec707216b985f759f412017885df273cc89cbb416	0x43099ac87ef54047a4c8c14e61278ce158905fed	0x68b3465833fb72a70ecdf485e0e4c7bd8665fc45	0	0x5ae401dc00000000000000000000000000000000000000000000000000000000638cd1f7000000000000000000000000000000000000000000000000000000000000004000000000000000000000000000000000000000000000000000000000000000020000000000000000000000000000000000000000000000000000000000000040000000000000000000000000000000000000000000000000000000000000016000000000000000000000000000000000000000000000000000000000000000e4472b4…	16112646	0xf5206556388826ccbe22f63c80b50c2fafdea94b886c047cd750f69c965d1ca0
68033	0xba18e203d367363fc5ce3336d1060f0119b919acefacf83a582ab26bba00c0d2	0xd5ebe5eaae8bc1f5a8bc591e36df86becf4a341c	0x68b3465833fb72a70ecdf485e0e4c7bd8665fc45	3.9e+17	0x5ae401dc00000000000000000000000000000000000000000000000000000000638cd20300000000000000000000000000000000000000000000000000000000000000400000000000000000000000000000000000000000000000000000000000000001000000000000000000000000000000000000000000000000000000000000002000000000000000000000000000000000000000000000000000000000000000e4472b43f300000000000000000000000000000000000000000000000005698eef06670…	16112646	0xf5206556388826ccbe22f63c80b50c2fafdea94b886c047cd750f69c965d1ca0
68034	0x5fffac0023b4b167f8844becd56aa72ebdddc1304e025e415eba9fc73ab4d0a4	0x9075858cb80588e2a378bba66137334d9b6fbb17	0x1111111254fb6c44bac0bed2854e76f90643097d	9.52e+16	0x2e95b6c800000000000000000000000000000000000000000000000000000000000000000000000000000000000000000000000000000000000000000152619ad1e151ca00000000000000000000000000000000000000000000000000006756d1dd2e9c0000000000000000000000000000000000000000000000000000000000000080000000000000000000000000000000000000000000000000000000000000000100000000000000003b6d0340e3d3551bb608e7665472180a20280630d9e938aa0bd34…	16112646	0xf5206556388826ccbe22f63c80b50c2fafdea94b886c047cd750f69c965d1ca0
68035	0xfaef4bfce049b377df928af47969fba5b0e8f81f25fc2b0eab11fa867a52159f	0x03c9399a4914fe167faf847f89224b4b607619b4	0x68b3465833fb72a70ecdf485e0e4c7bd8665fc45	4.31e+16	0x5ae401dc00000000000000000000000000000000000000000000000000000000638cd20300000000000000000000000000000000000000000000000000000000000000400000000000000000000000000000000000000000000000000000000000000001000000000000000000000000000000000000000000000000000000000000002000000000000000000000000000000000000000000000000000000000000000e4472b43f3000000000000000000000000000000000000000000000000009943a471d1c…	16112646	0xf5206556388826ccbe22f63c80b50c2fafdea94b886c047cd750f69c965d1ca0
68036	0xf00c2f3e596ed03faeccc533ad1b15477d57a28354a54a74265e87536bab3677	0x58aa497ab65d1866eea0730229dd2363773558d7	0x7a250d5630b4cf539739df2c5dacb4c659f2488d	0	0x791ac9470000000000000000000000000000000000000000001075fd296021459d8000000000000000000000000000000000000000000000000000000000160302b6517a00000000000000000000000000000000000000000000000000000000000000a000000000000000000000000058aa497ab65d1866eea0730229dd2363773558d700000000000000000000000000000000000000000000000000000000638ccbfe000000000000000000000000000000000000000000000000000000000000000200000…	16112646	0xf5206556388826ccbe22f63c80b50c2fafdea94b886c047cd750f69c965d1ca0
68037	0x56227ac2f13eb3a4d96f8014ca0193c3adfceeb6420a1dd4680cdf087a0161e9	0x2b96d4113ff5889a8962e18c517f109a1c1c8b34	0x000000000000ad05ccc4f10045630fb830b95127	8900000000000000	0x9a1fc3a70000000000000000000000000000000000000000000000000000000000000040000000000000000000000000000000000000000000000000000000000000036000000000000000000000000000000000000000000000000000000000000000e0000000000000000000000000000000000000000000000000000000000000001b8e245876144b7513eb2dc8d61e87e55318651e5cb135af7b2aff69781f32a1280c3a23e17dd12620aa3baa8fc6030ce14cba9d9fd01f4d1fc7cac0991bf1f1de00000…	16112646	0xf5206556388826ccbe22f63c80b50c2fafdea94b886c047cd750f69c965d1ca0
68040	0x0d3215160e461a0eba8f02e65eae03505abc4145038a91fd7b66bba7ed843294	0xab97925eb84fe0260779f58b7cb08d77dcb1ee2b	0x4bf755ba55984cb3b88b8d6e69a40b7d0e02e2f7	8e+16	0x	16112646	0xf5206556388826ccbe22f63c80b50c2fafdea94b886c047cd750f69c965d1ca0
68042	0x51c3cca7acde10b340374b742765c9308c6ea8eb87e4d0c0b0e7d0e58bac35d9	0xab97925eb84fe0260779f58b7cb08d77dcb1ee2b	0x63040666bbc38b689dbdda80652e3c7fb4c04bc6	8e+16	0x	16112646	0xf5206556388826ccbe22f63c80b50c2fafdea94b886c047cd750f69c965d1ca0
68047	0x0f189554fff89c501dddeb2e7876cf3a3a4938a144413b7c34eafe4b44d29bc6	0x21a31ee1afc51d94c2efccaa2092ad1028285549	0xcb238ee0492871eb3d4ba04df14f57fcd1b9edfc	9440000000000000	0x	16112646	0xf5206556388826ccbe22f63c80b50c2fafdea94b886c047cd750f69c965d1ca0
68049	0x15a871fcb46d09da2c954c0d54c5aad42a9d2eee0481859216d1781814b26538	0xfa6e906dd9084d50be4b0e6ac13ef5b7186362e2	0x76f4eed9fe41262669d0250b2a97db79712ad855	0	0xf17a454600000000000000000000000000000000000000000000000000000000000000c000000000000000000000000000000000000000000000000000000000000001a00000000000000000000000000000000000000000000000000000000356f5edbb00000000000000000000000000000000000000000000000000000003546551a00000000000000000000000001d64fb0ffa8362b2e1ee7ee03929159551eab26e000000000000000000000000000000000000000000000000000000000000022000000…	16112646	0xf5206556388826ccbe22f63c80b50c2fafdea94b886c047cd750f69c965d1ca0
68050	0x0ef47672358b88692b7b98aea0c7df5e833ffea63d04b0b906fde40c18f6727a	0x56eddb7aa87536c09ccc2793473599fd21a8b17f	0x7aee2f73f4bd6b5b1c43f6dd3a98ff8077f1e92e	9030000000000000	0x	16112646	0xf5206556388826ccbe22f63c80b50c2fafdea94b886c047cd750f69c965d1ca0
68053	0xefae35b0fd08d608ad63f308eeae5c905152860a01bfed7e458f50e7b27b509c	0xb739d0895772dbb71a89a3754a160269068f0d45	0x520a015b4c8cfe55178dc75584cef578024e634e	8720000000000000	0x	16112646	0xf5206556388826ccbe22f63c80b50c2fafdea94b886c047cd750f69c965d1ca0
68054	0xc8b9caf576335b42c98936ae9b3b21c6bdb24242463c568a8274884e60fa0981	0x3cd751e6b0078be393132286c442345e5dc49699	0xfbc101c352cf2996d407c033d6caa376da2b54df	8720000000000000	0x	16112646	0xf5206556388826ccbe22f63c80b50c2fafdea94b886c047cd750f69c965d1ca0
68057	0xa2b11637b36035caa4af536e99ce4f871482e81145e710d0ad6aab1fa5fa1967	0x503828976d22510aad0201ac7ec88293211d23da	0x31f6a9cf1deb10948f5bf36fff039a19920c43b0	8720000000000000	0x	16112646	0xf5206556388826ccbe22f63c80b50c2fafdea94b886c047cd750f69c965d1ca0
68058	0x5baacd691af9536a827d35550bc1164bee7e990424dd879fe770bb284317692c	0xb5d85cbf7cb3ee0d56b3bb207d5fc4b82f43f511	0x32b48d0b7dfa99c719158e95ad89a57845b5dda4	8720000000000000	0x	16112646	0xf5206556388826ccbe22f63c80b50c2fafdea94b886c047cd750f69c965d1ca0
68059	0xd7d4d4916597375bd74461ecd2c97684aee66ecc60393156d9fd29f2034c3a09	0x28c6c06298d514db089934071355e5743bf21d60	0x26797030747b90cda0fe022a975a43d663fec299	9440000000000000	0x	16112646	0xf5206556388826ccbe22f63c80b50c2fafdea94b886c047cd750f69c965d1ca0
68060	0xc61e0ea000779f3ae6a580c589e8c3dc94ff19430817eafc61abfbe9836ec84d	0x10121cb2b3f64f0a6231178336aca3e3b87d5ca5	0x049b51e531fd8f90da6d92ea83dc4125002f20ef	0	0xb31c01fb6be86d0e0056f69f0a59f5b4920a1ef743afc8302b29ceb394a6aea5f9cddc754d813df0a57343489cf69896f9afc30d6145d4097c94a7cd8d37da0d92463b61000000000000000000000000000000000000000000000000000000000000006000000000000000000000000000000000000000000000000000000000000000415f5d915b1742755e191713012795edca066b98b83b040517bf36d59a4f05ce5369e003ef8d67be7874a47dee75cbabcbeab4d2002e0b5ec4aa89bda360b75a951c000…	16112646	0xf5206556388826ccbe22f63c80b50c2fafdea94b886c047cd750f69c965d1ca0
68061	0x7381009c1b87ad472e3610e2cff71fe41907c1aa261ca4f3affd8d820b99222d	0x503828976d22510aad0201ac7ec88293211d23da	0x39cafc2fdede25b02ae741b5e7c4e75ec776f403	8720000000000000	0x	16112646	0xf5206556388826ccbe22f63c80b50c2fafdea94b886c047cd750f69c965d1ca0
68062	0x218090fbafdf5a33ab63e4ab3cd715b46b032dc6f7a285b17cebe23a026b0d29	0x3cd751e6b0078be393132286c442345e5dc49699	0xfd78041c2f2962be0d59368bc5f235372670ae1d	8720000000000000	0x	16112646	0xf5206556388826ccbe22f63c80b50c2fafdea94b886c047cd750f69c965d1ca0
68063	0x88273b4bae05688907614729ac1aa87a564b295553e467ac5b4a91f25247a9ee	0xb739d0895772dbb71a89a3754a160269068f0d45	0x0fc354c0556d4a773dbf7758cdda4b17c18f7de7	8720000000000000	0x	16112646	0xf5206556388826ccbe22f63c80b50c2fafdea94b886c047cd750f69c965d1ca0
68065	0xe1bcaf9e71eff74226c7d55c22a107f7bcba18fad754ced94b86712c6ee66d24	0x95a9bd206ae52c4ba8eecfc93d18eacdd41c88cc	0x6ff4d8dbbd2cfc5d206d843f052828ec37b7c64c	8720000000000000	0x	16112646	0xf5206556388826ccbe22f63c80b50c2fafdea94b886c047cd750f69c965d1ca0
68066	0x23fd9956f4891142e116831196880d562127a74b7659cf7842c20f4898a80988	0x3cd751e6b0078be393132286c442345e5dc49699	0x9c8ff8b404c11f310c7f32874a0e9c6cc606ef07	8720000000000000	0x	16112646	0xf5206556388826ccbe22f63c80b50c2fafdea94b886c047cd750f69c965d1ca0
68067	0x26302867afa48920a29fb83526e3f1aa186cb769872bb95d8fa735188e25a42f	0x38523de7f1bbf1cd09a4f50fdcf9a2ab2c734a1a	0x7a250d5630b4cf539739df2c5dacb4c659f2488d	1.5e+16	0x7ff36ab5000000000000000000000000000000000000000000000c4e5507fc4b7ad37b57000000000000000000000000000000000000000000000000000000000000008000000000000000000000000038523de7f1bbf1cd09a4f50fdcf9a2ab2c734a1a00000000000000000000000000000000000000000000000000000000638ccfb90000000000000000000000000000000000000000000000000000000000000002000000000000000000000000c02aaa39b223fe8d0a0e5c4f27ead9083c756cc200000…	16112646	0xf5206556388826ccbe22f63c80b50c2fafdea94b886c047cd750f69c965d1ca0
68068	0x006ce84e41932732ba4bf4ce258e54487fa407c882c5a5704cd18a57abbe4906	0x95a9bd206ae52c4ba8eecfc93d18eacdd41c88cc	0x6338a023e8f84ff5a2ddc373af31d9b4d440422d	8720000000000000	0x	16112646	0xf5206556388826ccbe22f63c80b50c2fafdea94b886c047cd750f69c965d1ca0
68069	0x86054e02c44fdc1f0922664c011e7f0730d51087293f5d46473a199a5e01c0b1	0xddfabcdc4d8ffc6d5beaf154f18b778f892a0740	0x62694c53db77a38a0a5399b70e81c68fdab0fbf7	8720000000000000	0x	16112646	0xf5206556388826ccbe22f63c80b50c2fafdea94b886c047cd750f69c965d1ca0
68070	0xee30dec607acc612d4ef9483e5952164af5e10fe395792496738628c148a02ff	0x3cd751e6b0078be393132286c442345e5dc49699	0x8d7c4150cea15ca6b4d1d20df5d33d2e7e411f9e	8720000000000000	0x	16112646	0xf5206556388826ccbe22f63c80b50c2fafdea94b886c047cd750f69c965d1ca0
68075	0xd17975ac23ed4ab8c9577c981f75ab63951f0c916d3d8e8063a786e7aaf7a18b	0x7c195d981abfdc3ddecd2ca0fed0958430488e34	0xbc788b1429f1da5fef9651147e389288804937ca	8720000000000000	0x	16112646	0xf5206556388826ccbe22f63c80b50c2fafdea94b886c047cd750f69c965d1ca0
68077	0xec4bdd7dcb11d63a72a49356cf9c713955451b1b4f88b658732154a851ce98b6	0x71660c4005ba85c37ccec55d0c4493e66fe775d3	0x829b82a8299daf66997fded1e24f8676cc025658	8720000000000000	0x	16112646	0xf5206556388826ccbe22f63c80b50c2fafdea94b886c047cd750f69c965d1ca0
68078	0xb0acc699c369dbd459097b645a551955a0946f7c8182ccd17571d4cc45de91c0	0xeb2629a2734e272bcc07bda959863f316f4bd4cf	0xc6368b3dfdb3485845d78ade055eaa4a5b1fdb8d	8720000000000000	0x	16112646	0xf5206556388826ccbe22f63c80b50c2fafdea94b886c047cd750f69c965d1ca0
68079	0xe3d2d0d0c863abf9959b5f78987e3aff0209503f4219f95f4503c6b39c0c019b	0xb739d0895772dbb71a89a3754a160269068f0d45	0x334029119f5358ac8b5cbb91f878664e5de81d7f	8720000000000000	0x	16112646	0xf5206556388826ccbe22f63c80b50c2fafdea94b886c047cd750f69c965d1ca0
68082	0xabd61056393dc743ec016b17cbf55f37755a23272123ec494bd43b85a046e645	0x90f86774e792e91cf81b2ff9f341efca649343a6	0xf629cbd94d3791c9250152bd8dfbdf380e2a3b9c	0	0xa9059cbb0000000000000000000000004547b410f92ca9f02a089346b11d271d1a968d50000000000000000000000000000000000000000000000035dfbeda9f37340000	16112646	0xf5206556388826ccbe22f63c80b50c2fafdea94b886c047cd750f69c965d1ca0
68083	0x29f9a0d05bd69638c339d078e097ef5e5f35a78ef380822a5cdc196a6ec9a875	0xe95f6604a591f6ba33accb43a8a885c9c272108c	0x7c6221a7f806f7563de352764eaf805f3de96fbd	3.44e+16	0x	16112646	0xf5206556388826ccbe22f63c80b50c2fafdea94b886c047cd750f69c965d1ca0
68084	0xe5f7bccd5b9e31720f2e467a94224e3b45e1f526f99c05f01a9c7931a04d403f	0xc35fb86f962ea955751a793a007b5cdd44f798d7	0x46f6e18a8f63153045cdf987b43e4becc5965a19	3.65e+16	0x	16112646	0xf5206556388826ccbe22f63c80b50c2fafdea94b886c047cd750f69c965d1ca0
68085	0x2759ad646fd03d50f894773b16905ac5d5c3e1a673a08d4ff3b502be9f1dc292	0xe95f6604a591f6ba33accb43a8a885c9c272108c	0x318d0be7568e025cffe36e3b82b17299757bee0b	1.6e+16	0x	16112646	0xf5206556388826ccbe22f63c80b50c2fafdea94b886c047cd750f69c965d1ca0
68086	0x2a63ab7f037f05e8c667e20badca57c8a1f66537d2ce204b05b270b2ef4a55d3	0xde9b6a3238e60f71a0b78e2d9cd1e1cb1ece7492	0x6c3197c9f3954b682b0e64b520e6da5fe74fcf8b	0	0x23b872dd000000000000000000000000de9b6a3238e60f71a0b78e2d9cd1e1cb1ece7492000000000000000000000000fe7588363baa3734981b697045299a1c976e046c0000000000000000000000000000000000000000000000000000000000000058	16112646	0xf5206556388826ccbe22f63c80b50c2fafdea94b886c047cd750f69c965d1ca0
68088	0x36ee73deeaa3d864ecefd7efee9cd5a7a4449cfed8d596f609d1f8cec6915f3d	0x6457a438e924eeeb2aa14c254db044bf774b62eb	0xeeeec6476073778077b40a73fe32e23a9876cab4	7.91e+16	0x2b66d72e000000000000000000000000000000000000000000000000000000000000002000000000000000000000000000000000000000000000000000000000000000ee65794a68624763694f694a46557a49314e694973496d74705a434936496a64684e6a526c5a6d51314c544a694e4463744e475a6a5a6931684f4463784c5445785a6d59354f5451345954646a4f434a392e436763784d6a597a4c6a513345674e56553051614a444e6a5a54566a597a686c4c57526d4d324d744e475530596930344d4…	16112646	0xf5206556388826ccbe22f63c80b50c2fafdea94b886c047cd750f69c965d1ca0
68089	0xadfe9612b3289a9980a22252b84007fab3e149179e2f7648e458fc21b5382c23	0xd5804b57c295d0f198554c8e91d455ec1a7fe0da	0xc02aaa39b223fe8d0a0e5c4f27ead9083c756cc2	1e+17	0xd0e30db0	16112646	0xf5206556388826ccbe22f63c80b50c2fafdea94b886c047cd750f69c965d1ca0
68089	0xadfe9612b3289a9980a22252b84007fab3e149179e2f7648e458fc21b5382c23	0xd5804b57c295d0f198554c8e91d455ec1a7fe0da	0xc02aaa39b223fe8d0a0e5c4f27ead9083c756cc2	1e+17	0xd0e30db0	16112646	0xf5206556388826ccbe22f63c80b50c2fafdea94b886c047cd750f69c965d1ca0
68090	0x8e48a90f47a5f0d35a921d0845a78dba9fb495621ab560de532cae970bd4ce54	0x21a31ee1afc51d94c2efccaa2092ad1028285549	0x2b84fa9badd09d1f1563da6f01fc3be4d1e11dc3	5.67e+17	0x	16112646	0xf5206556388826ccbe22f63c80b50c2fafdea94b886c047cd750f69c965d1ca0
68091	0x8e41287fc2365fdbf9d11b0d44396e75195fdce7d98005bc3ea3b563bedec053	0x2a91d154cdcdf08a553017afdcdea398c8b706a6	0x98c3d3183c4b8a650614ad179a1a98be0a8d6b8e	0	0x27d175fa00000000000000000000000000000000000000000000004fff313775e138162e00000000000000000000000000000000000000000000000000000000969e85c50000000000000000000000008c1c499b1796d7f3c2521ac37186b52de024e58c00000000000000000000000031c8eacbffdd875c74b94b077895bd78cf1e64a3000000000000000000000000000000000000000000000000000000000000000100000000000000000000000000000000000000000000000000000000638ccb5000000…	16112646	0xf5206556388826ccbe22f63c80b50c2fafdea94b886c047cd750f69c965d1ca0
68092	0x645a78f8869787d7405a59f287624fd7fc49cd9ba8169650b954665415e19bf0	0x8695484d8842036fca74e3b52d5eddae0b6da679	0x0e4e58701be47cf4ed9a655777dcde803a017c2d	0	0x42842e0e0000000000000000000000008695484d8842036fca74e3b52d5eddae0b6da679000000000000000000000000a88125fdd9b6b8bdad9449861b9b79db9feab865000000000000000000000000000000000000000000000000000000000000040d360c6ebe	16112646	0xf5206556388826ccbe22f63c80b50c2fafdea94b886c047cd750f69c965d1ca0
68093	0x6c4647b06485dccdae521ef31dd2402efd51a05d474e769fbc034135590430ab	0x0ac15e8f56e1cc7dd8a25e9f616b20f939709e49	0x7492e30d60d96c58ed0f0dc2fe536098c620c4c0	0	0xefef39a10000000000000000000000000000000000000000000000000000000000000001	16112646	0xf5206556388826ccbe22f63c80b50c2fafdea94b886c047cd750f69c965d1ca0
68094	0x2f3ffffad3410e17281cfbf094cfca351a0449f1e756360b9f1f2d980eeb5227	0xe5cf4fb4add47645a6ad2dc9b463d8bcfcabd02c	0x34a7cef62099387b6e53d6b1de2aeb5d3e4bfb2b	4000000000000000	0x	16112646	0xf5206556388826ccbe22f63c80b50c2fafdea94b886c047cd750f69c965d1ca0
68095	0x6f6cab25803cfb5c70469e1677e0c526d9380a4df2ff867c109fb8a8bd586e0a	0x6887246668a3b87f54deb3b94ba47a6f63f32985	0x5e4e65926ba27467555eb562121fac00d24e9dd2	0	0xd0f893440002b41ab30000ce0000080000000000000000000000000000000000002600000000638ccad10000f5dbce00000900000000638ccad10000f5dbcf00003f00000000638ccae00000f5dbcf00000600000000638ccae00000f5dbd000004100000000638ccaef0000f5dbd000000700000000638ccaef0000f5dbd100001200000000638ccafe0000f5dbd1789cec7d075454c9d2f09d21e79c05499241f20c51900c9211c94806899224a80c415124294312942ba24850509028284144090a9283820…
68096	0x256a7b351003e9ea67417d0d14e0514a95ebc5653dd25a6466c3bf2e5917a267	0x18a574c6374393ed1090be5ccc8964ec800fc716	0xf403c135812408bfbe8713b5a23a04b3d48aae31	0	0x60759fce00000000000000000000000000000000000000000000000000000000000000170000000000000000000000000000000000000000000000000000000000000001	16112646	0xf5206556388826ccbe22f63c80b50c2fafdea94b886c047cd750f69c965d1ca0
68099	0xdb662c310d466c843bce00dbc6df13a5f8bfb111857ac3b21dc01f4a528f8ae8	0x73cca97b6d0b6ea0ac07388080b866a7ac8a641a	0xdac17f958d2ee523a2206206994597c13d831ec7	0	0xa9059cbb000000000000000000000000e886334ae81f3c53f178b69ccd420e6166dadeeb0000000000000000000000000000000000000000000000000000000002e3e753	16112646	0xf5206556388826ccbe22f63c80b50c2fafdea94b886c047cd750f69c965d1ca0
68100	0xea91bd0f675090d716b7fc4b8082c195a0b6fd8c25104980312d4b1afd391e94	0xebfd5138d9160493492762505dbd4f8fd43aee1e	0x55350f5d7359c4f53bf77563c8fbec802dc505a0	1.68e+16	0x	16112646	0xf5206556388826ccbe22f63c80b50c2fafdea94b886c047cd750f69c965d1ca0
68101	0x4ac4b25f5387075c70f1658787b01f242bac9315406b47f980d19e72420810aa	0x6db303b564a05e9c17fbb22c7108561e08c3ae7b	0x6b175474e89094c44da98b954eedeac495271d0f	0	0x095ea7b3000000000000000000000000c186fa914353c44b2e33ebe05f21846f1048bedaffffffffffffffffffffffffffffffffffffffffffffffffffffffffffffffff	16112646	0xf5206556388826ccbe22f63c80b50c2fafdea94b886c047cd750f69c965d1ca0
68103	0x20157b8b4f9feb8216346e80bd818d9d7df6fa67a6ed049d194fc38ad2349f37	0x89d0f20e0e0f8393a0162f55e22aaeb111267fb1	0xa97d3eb991303cf3b9b759bd026bacb55256e9db	0	0xa22cb46500000000000000000000000000000000000111abe46ff893f3b2fdf1f759a8a80000000000000000000000000000000000000000000000000000000000000001	16112646	0xf5206556388826ccbe22f63c80b50c2fafdea94b886c047cd750f69c965d1ca0
68104	0x6f96387c771b38afb74063c0d05571429d159bee1e011557c8938ffb44f78f7c	0xaf589b5bba5113e9733e44dadff8adec1438f8fc	0xc02aaa39b223fe8d0a0e5c4f27ead9083c756cc2	2.1e+17	0xd0e30db0	16112646	0xf5206556388826ccbe22f63c80b50c2fafdea94b886c047cd750f69c965d1ca0
68108	0xf94194e9dfadd3ee8e7479e155a54f5d51a1b822bf7591bf233b80525f11cac6	0xa8f0048a0d1a04663ca5010d0beac5bcaeea0eef	0x5a7749f83b81b301cab5f48eb8516b986daef23d	0	0x3687011a000000000000000000000000bcc664b1e6848caba2eb2f3de6e21f81b9276dd8000000000000000000000000a1cf8f2e3667f21179c9b894dfcfa45f86bdfc2c0000000000000000000000000000000000000000000000000000000000000a8c0000000000000000000000000000000000000000000000000000000000124f8000000000000000000000000000000000000000000000000000000000000000a0000000000000000000000000000000000000000000000000000000000000000100000…	16112646	0xf5206556388826ccbe22f63c80b50c2fafdea94b886c047cd750f69c965d1ca0
68109	0x16e12f13f13076389e8bbfec6b02ef5cc8ffefd1b9449e421c9c460966e0b60c	0x8aa28b73a5ea7a7a1446ee51806fc70474615185	0xc02aaa39b223fe8d0a0e5c4f27ead9083c756cc2	0	0x095ea7b30000000000000000000000001e0049783f008a0085193e00003d00cd54003c710000000000000000000000000000000000000000000000000000000000000000	16112646	0xf5206556388826ccbe22f63c80b50c2fafdea94b886c047cd750f69c965d1ca0
68110	0xfa23e2eb1d64eae223ecef7e3bed664750a909876974834dfa59baf37e502efc	0xc7c5eb14fa2c66861a95eadb731122cbff83ff96	0x00000000006c3852cbef3e08e8df289169ede581	1.1e+16	0xfb0f3ee100000000000000000000000000000000000000000000000000000000000000200000000000000000000000000000000000000000000000000000000000000000000000000000000000000000000000000000000000000000000000000000000000000000000000000000000000000000000000000000000000261a54a7375000000000000000000000000000bd9048c116b18610b25b342773529bae9df5a12d000000000000000000000000004c00500000ad104d7dbd00e3ae0a5c00560c0000000…	16112646	0xf5206556388826ccbe22f63c80b50c2fafdea94b886c047cd750f69c965d1ca0
68111	0x39113caf050a3bf43be11c0bb5d0113b11a54b7a3441cc743a364f9ffcc2ab39	0x337a4268710fd0214326f2256d715484be71ca41	0xa46f952645d4deec07a7cd98d1ec9ec888d4b61e	0	0x2a6521ec000000000000000000000000c187f150b05f2c918db13310dcfc7924b96b11680000000000000000000000000000000000000000000000000000000060e040f00000000000000000000000000000000000000000000000000000000000000060000000000000000000000000000000000000000000000000000000000000000a0000000000000000000000000000000000000000000000000000000000000000000000000000000000000000000000000000000000000000000000000000000000000…	16112646	0xf5206556388826ccbe22f63c80b50c2fafdea94b886c047cd750f69c965d1ca0
68112	0xba548b54582e44420da51d1b514dc4662ae92ff1fc4d00496f68ab09aa528771	0x58b42b09629e707b747cbb5152307baf86a1a71c	0x74e12f886d5299295a72983fbd7a499c8021e444	2000000000000000	0x	16112646	0xf5206556388826ccbe22f63c80b50c2fafdea94b886c047cd750f69c965d1ca0
68114	0xebf1cdec4d6b558e3ae6b8a429f75c9d91e6a61fba0373f6b3ea8b16e5eb5831	0x354d0d9d71495b7c6b177ce2825708071de075ab	0x7c5c2d0097af63fe302fae8d6b9ca4daca0022eb	6930000000000000	0x	16112646	0xf5206556388826ccbe22f63c80b50c2fafdea94b886c047cd750f69c965d1ca0
68115	0xee66e0d0a07e6263573f568c1627ad86898d499c3e18ee318e644e7eb5cd99bb	0x8aff8ecd5b24ac26bc072f2d4a6cc8b081fe2587	0x72240d480ecf201002cd5eabc08104a1d0b2e25c	0	0x095ea7b300000000000000000000000068b3465833fb72a70ecdf485e0e4c7bd8665fc45ffffffffffffffffffffffffffffffffffffffffffffffffffffffffffffffff	16112646	0xf5206556388826ccbe22f63c80b50c2fafdea94b886c047cd750f69c965d1ca0
68116	0xfc96adc7c78d0349ab61482b1560815a611b9a8ca27efb0d7fd1dad4dc7912a1	0x3c8668bf0a3cc7bb89876c4c1466cbe786a83be9	0x881d40237659c251811cec9c364ef91dc08d300c	9e+16	0x5f57552900000000000000000000000000000000000000000000000000000000000000800000000000000000000000000000000000000000000000000000000000000000000000000000000000000000000000000000000000000000013fbe85edc9000000000000000000000000000000000000000000000000000000000000000000c00000000000000000000000000000000000000000000000000000000000000017616972737761704c696768743346656544796e616d696300000000000000000000000…	16112646	0xf5206556388826ccbe22f63c80b50c2fafdea94b886c047cd750f69c965d1ca0
68117	0x0bf478de46b092fd5d35956b232a88cb3cb870035ec8bb23c98dd2306a1ce148	0x4306dd0c18b58e34e587003841d736a449392d49	0x44e94034afce2dd3cd5eb62528f239686fc8f162	0	0x26c858a4000000000000000000000000ebef3b7f7ff5166b641ce5e73be1c9d9defba81d0000000000000000000000000000000000000000000000000000000060b410f0000000000000000000000000000000000000000000000000000000000000000a00000000000000000000000000000000000000000000000000000000000000c000000000000000000000000000000000000000000000000000000000000000e00000000000000000000000004306dd0c18b58e34e587003841d736a449392d4900000…	16112646	0xf5206556388826ccbe22f63c80b50c2fafdea94b886c047cd750f69c965d1ca0
68118	0x964cd52ef92f38a3bbebfc6b7675938dfcf73feaf5d7484126da734ea91a1a18	0x8a6be31db597b1a7b010e6d6ebdd8b891355e74c	0xb88dfaa337ca2972df25044c0e7c19b8c1742fa6	1.05e+16	0x	16112646	0xf5206556388826ccbe22f63c80b50c2fafdea94b886c047cd750f69c965d1ca0
68119	0xd2dd7a39a27813d1de0faef2ab79530bea58ebcf88cbe35478cfbeaf98ce54f7	0xa24e820777dbfa6acb15e5d810a26843a0740933	0xe2242ce8670d2e23b0c629b6f12d48f3403fdf1f	0	0x7abd1f3e	16112646	0xf5206556388826ccbe22f63c80b50c2fafdea94b886c047cd750f69c965d1ca0
68125	0x2c036719380a48553146b0d53d28020d136ee8a9d13bdd3392605b63a158555d	0xb739d0895772dbb71a89a3754a160269068f0d45	0xebc606c199ba526f6ef69a3f8996dd3d9558f70f	8720000000000000	0x	16112646	0xf5206556388826ccbe22f63c80b50c2fafdea94b886c047cd750f69c965d1ca0
68129	0xb416028b63755ff6a6f1359ddfa7e6a7f80e9ee14ec7dd7c45f1185a05fd7372	0xa3abf2791665b65a9cd161a9f1791f3b668a953f	0xa3abf2791665b65a9cd161a9f1791f3b668a953f	2000000000000000	0x	16112645	0xe99f6e87a99eafd174a39eb092bd1fed13ffb022170209341ac2c8de521f2026
68132	0x995b0ca5cfbf053543ae5950c6f1152f1b83a9001792231ff0d598317e5f97d4	0x5fe0e1ea278587283bd2d45665aa9e1a4f80a2cd	0xc18c07a18198a6340cf4d94855fe5eb6dd33b46e	0	0xa9059cbb000000000000000000000000d8badf63ee9c22952095123dbace6142dd5e51b30000000000000000000000000000000000000000000000000000000000000203	16112645	0xe99f6e87a99eafd174a39eb092bd1fed13ffb022170209341ac2c8de521f2026
68135	0xead69751a136ec89d39d3598956c6e5b8c5654491034dfe630efd370b2531b09	0x93c6eca16182cd1e153c4cd9b3075002d1e6d2ed	0x9faea6cc43270c5a3bdc4d9fca6c3cbc795a476e	1.84e+17	0x	16112645	0xe99f6e87a99eafd174a39eb092bd1fed13ffb022170209341ac2c8de521f2026
68137	0xa19b5d207497bffbd23fc495c7b31b644f1879a7c82436c691ae4db21111a718	0xa8f0048a0d1a04663ca5010d0beac5bcaeea0eef	0x5a7749f83b81b301cab5f48eb8516b986daef23d	0	0x3687011a000000000000000000000000bcc664b1e6848caba2eb2f3de6e21f81b9276dd8000000000000000000000000a1cf8f2e3667f21179c9b894dfcfa45f86bdfc2c0000000000000000000000000000000000000000000000000000000000000a8c0000000000000000000000000000000000000000000000000000000000124f8000000000000000000000000000000000000000000000000000000000000000a0000000000000000000000000000000000000000000000000000000000000000100000…	16112645	0xe99f6e87a99eafd174a39eb092bd1fed13ffb022170209341ac2c8de521f2026
68138	0x3ad56ef4aaa14eb963670c0feef65406554df07a563e91e8a6c2e2c8bfe209cf	0x6bdd1b8aa0a234c4c32bde259b484bc5484d2709	0x7492e30d60d96c58ed0f0dc2fe536098c620c4c0	0	0xefef39a10000000000000000000000000000000000000000000000000000000000000001	16112645	0xe99f6e87a99eafd174a39eb092bd1fed13ffb022170209341ac2c8de521f2026
68139	0xfbb9a0d8545216be03ff602d73850cfb7343473f364a8dbf2e6b23e83da35f97	0x2548a0fcd4fb8f1891796e3c147264b82749760f	0x7492e30d60d96c58ed0f0dc2fe536098c620c4c0	0	0xefef39a10000000000000000000000000000000000000000000000000000000000000001	16112645	0xe99f6e87a99eafd174a39eb092bd1fed13ffb022170209341ac2c8de521f2026
68141	0x3da22c5557c69e6b63b9c6ac614234532a61609be37c366aee676a5a8bdabfdf	0x46bd49a624815141b3401c34fe5d4e111245018e	0x7492e30d60d96c58ed0f0dc2fe536098c620c4c0	0	0xefef39a10000000000000000000000000000000000000000000000000000000000000001	16112645	0xe99f6e87a99eafd174a39eb092bd1fed13ffb022170209341ac2c8de521f2026
68142	0xf36770fbc62c86673bf9466cd0695449bf86ae1e34ef899e4bc5a0d9a57513c6	0xdaecfcbf152a8bc7ef6c67d477b4b6eddd4b7580	0x083d41d6dd21ee938f0c055ca4fb12268df0efac	0	0xa9059cbb000000000000000000000000daecfcbf152a8bc7ef6c67d477b4b6eddd4b758000000000000000000000000000000000000000000000000000000000000f4240	16112645	0xe99f6e87a99eafd174a39eb092bd1fed13ffb022170209341ac2c8de521f2026
68143	0xdaa719b6906267066d623b0b096a0b64fdc470463107b60f7eadc4aab59902b3	0x83854db8cc046f0cdb27ca941022d1051ab8dee1	0x7492e30d60d96c58ed0f0dc2fe536098c620c4c0	0	0xefef39a10000000000000000000000000000000000000000000000000000000000000001	16112645	0xe99f6e87a99eafd174a39eb092bd1fed13ffb022170209341ac2c8de521f2026
68146	0x580fe684c9b01793b8932ee4f8b689ec4bd21a388406a074a89f34a19312a047	0xbd1a1fb692242676d7814dbb31a5ee8c75ea656b	0xb1d55f887bd9fe910dbba97330a88936ef70765d	3.8e+17	0x	16112645	0xe99f6e87a99eafd174a39eb092bd1fed13ffb022170209341ac2c8de521f2026
68147	0xe15052ed20a36e9b73d6359ac76c1bbd9ac630c9a57be222db16676fc5fd83e1	0xa7691bd74b35f7f63498015d8f59168ab1998756	0x7492e30d60d96c58ed0f0dc2fe536098c620c4c0	0	0xefef39a10000000000000000000000000000000000000000000000000000000000000001	16112645	0xe99f6e87a99eafd174a39eb092bd1fed13ffb022170209341ac2c8de521f2026
68156	0xc4b76f6937cb23da28ef6a1f526cf9400bebb448f1f75d9ff4b12891474277aa	0x09f0ab22dfb76691e38a89f7bf9d121aef41aa9a	0xdac17f958d2ee523a2206206994597c13d831ec7	0	0xa9059cbb0000000000000000000000009380009a35d63246eee35efcf139e6610fe77ed300000000000000000000000000000000000000000000000000000000166cd1d2	16112645	0xe99f6e87a99eafd174a39eb092bd1fed13ffb022170209341ac2c8de521f2026
68157	0x19e9ce80dfab97063e180017d69dd499559e535c7cf68d315dce9069b64cde1e	0x2fb8e9fe1ad2764687aaa1806290a1c178446def	0x68b3465833fb72a70ecdf485e0e4c7bd8665fc45	0	0x5ae401dc00000000000000000000000000000000000000000000000000000000638cd1eb000000000000000000000000000000000000000000000000000000000000004000000000000000000000000000000000000000000000000000000000000000020000000000000000000000000000000000000000000000000000000000000040000000000000000000000000000000000000000000000000000000000000016000000000000000000000000000000000000000000000000000000000000000e4472b4…	16112645	0xe99f6e87a99eafd174a39eb092bd1fed13ffb022170209341ac2c8de521f2026
68158	0x08d8713714580eb143cd1f56e9f25a800c7d2abb954a17d2cc52030a896af97c	0x3e46576af1027c6a0419f725a499c984922ceb29	0xdac17f958d2ee523a2206206994597c13d831ec7	0	0xa9059cbb00000000000000000000000089107333fd38c935d5dde25b5d924662e712cb06000000000000000000000000000000000000000000000000000000000cfc77b6	16112645	0xe99f6e87a99eafd174a39eb092bd1fed13ffb022170209341ac2c8de521f2026
68159	0x54e63f472eed52040e45f55ff1bf4f5d110104786396197cd986b1068ce893bb	0xbd393f88bf3e97da8421ffef15d8fc47d771033f	0xff1f2b4adb9df6fc8eafecdcbf96a2b351680455	4.04e+16	0x7ff48afb0000000000000000000000000000000000000000000000000000000000000000000000000000000000000000000000000000000000000000008f75656407c000000000000000000000000000bd393f88bf3e97da8421ffef15d8fc47d771033f0000000000000000000000000000000000000000000000000000000000000000	16112645	0xe99f6e87a99eafd174a39eb092bd1fed13ffb022170209341ac2c8de521f2026
68161	0xb6031872f9483fdf1797f5f61aeee7c7cdabe92fefd2a45263207dd3781c6f3c	0x91aae0aafd9d2d730111b395c6871f248d7bd728	0x98c3d3183c4b8a650614ad179a1a98be0a8d6b8e	0	0xce2e62ff000000000000000000000000000000000000000000000000108d49049ff64300000000000000000000000000000000000000000000000010d36ded6b93a3000000000000000000000000000061eb53ee427ab4e007d78a9134aacb3101a2dc23000000000000000000000000c02aaa39b223fe8d0a0e5c4f27ead9083c756cc2000000000000000000000000000000000000000000000000000000000000000000000000000000000000000000000000000000000000000000000000638ccb48	16112645	0xe99f6e87a99eafd174a39eb092bd1fed13ffb022170209341ac2c8de521f2026
68164	0x308705c0b32a0d2590c6dbae987f856bfbdbe50a6528e8e76a307bb4f08191fc	0xb63ef0c9d8510b8dc61adf857af24e10fd29c6e9	0x1111111254fb6c44bac0bed2854e76f90643097d	0	0x2e95b6c8000000000000000000000000d2877702675e6ceb975b4a1dff9fb7baf4c91ea9000000000000000000000000000000000000000000008ccb3e6a27b9c045f400000000000000000000000000000000000000000000000000013d01f45160f77a00000000000000000000000000000000000000000000000000000000000000800000000000000000000000000000000000000000000000000000000000000001c0000000000000003b6d034060a39010e4892b862d1bb6bdde908215ac5af6f30bd34…	16112645	0xe99f6e87a99eafd174a39eb092bd1fed13ffb022170209341ac2c8de521f2026
68165	0xb174f6d2dcb74514e2cefd3eb87fb6218548832d493df148202631a03256850a	0xcd1c4d52bc5c2a06051a8fa51886a3af4a4af00c	0x68b3465833fb72a70ecdf485e0e4c7bd8665fc45	1.5e+17	0x5ae401dc00000000000000000000000000000000000000000000000000000000638cd1eb00000000000000000000000000000000000000000000000000000000000000400000000000000000000000000000000000000000000000000000000000000001000000000000000000000000000000000000000000000000000000000000002000000000000000000000000000000000000000000000000000000000000000e4472b43f30000000000000000000000000000000000000000000000000214e8348c4f0…	16112645	0xe99f6e87a99eafd174a39eb092bd1fed13ffb022170209341ac2c8de521f2026
68167	0x4484f1c05f531b9bd5b59e44268a54f671102365b198c6729fc9536f7c1002d0	0x1e37ac28b17ecfbcceff42c3f91e47cb45de2dc2	0x99c63d98a5314d363f7d8d730c8825dc807e2e42	0	0x5b70ea9f	16112645	0xe99f6e87a99eafd174a39eb092bd1fed13ffb022170209341ac2c8de521f2026
68169	0xff4db446012e45c5a364d24ef19b5fc7e4e331d4250164f7ebca065a79de8b0c	0x5e2b6c6b2240d582995537d3fafdb556e4a3822f	0x98c3d3183c4b8a650614ad179a1a98be0a8d6b8e	0	0x49c36c07000000000000000000000000e3fe800b0de664bf0bca8ad58ecbc73b259047b00000000000000000000000000000000000000000000000000b335cd44c392b800000000000000000000000000000000000002ac029402bcbdc000000000000000000000000000000000000000000000000002acb9f64ecc446000000000000000000000000000000000000000000000000000000000000000000000000000000	16112645	0xe99f6e87a99eafd174a39eb092bd1fed13ffb022170209341ac2c8de521f2026
68170	0x731622ed6536813f03c0a3b2c4c4bce5ecdce2b704e7a65851c82a57b0ec697c	0x6dfc34609a05bc22319fa4cce1d1e2929548c0d7	0xdc87ea53eaacf6831e8d39405c7beb86658f0b93	670000000000000	0x	16112645	0xe99f6e87a99eafd174a39eb092bd1fed13ffb022170209341ac2c8de521f2026
68171	0xce2ed878d94ac1b7edd12991c000589f8d14729e4fb3f6797487f386d780530c	0xc467370dc17f3428ec620fca05c33ea647e80ead	0x76f4eed9fe41262669d0250b2a97db79712ad855	3e+16	0xf17a454600000000000000000000000000000000000000000000000000000000000000c000000000000000000000000000000000000000000000000000000000000001a0000000000000000000000000000000000000000000000000006a94d74f430000000000000000000000000000000000000000000000000000006983fe1dd440000000000000000000000000001d64fb0ffa8362b2e1ee7ee03929159551eab26e000000000000000000000000000000000000000000000000000000000000022000000…	16112645	0xe99f6e87a99eafd174a39eb092bd1fed13ffb022170209341ac2c8de521f2026
68172	0xaaf6dc3a3ec042ba490b2c6ff49b33b953f36050feec4061ba82c543dadc0d8f	0x98db3a41bf8bf4ded2c92a84ec0705689ddeef8b	0xd2d1f71c709f480cf278e0a14c7bf92cb3eedd37	5.23e+16	0x	16112645	0xe99f6e87a99eafd174a39eb092bd1fed13ffb022170209341ac2c8de521f2026
68173	0xe642f38d77cc6d2973a9d21de36d76398ca411fba085a6f84b95ad43f0171c41	0xbda77851639db4dbd7b006e50227e931330e6b6b	0x00000000006c3852cbef3e08e8df289169ede581	0	0xe7acab24000000000000000000000000000000000000000000000000000000000000008000000000000000000000000000000000000000000000000000000000000006600000007b02230091a7ed01230072f7006a004d60a8d4e71d599b8104250f0000000000000000000000000000000000000000000000000000000000000000000000000000000000000000000000000000000000000000000000000000000000a0000000000000000000000000000000000000000000000000000000000000000100000…	16112645	0xe99f6e87a99eafd174a39eb092bd1fed13ffb022170209341ac2c8de521f2026
68174	0x370b41b1e0095b2748996d41fb2cd05badbae8ccca5f64542a3220ec378b8fe0	0xd70319236bc1a64c5ae7386c8082dfbaeb4e5a65	0x88a61adc9d1ff200aaaa80941202c8b96149a9de	1.22e+16	0x	16112645	0xe99f6e87a99eafd174a39eb092bd1fed13ffb022170209341ac2c8de521f2026
68176	0x11504f9b2be55aa4b341d94406f2f806cf8644f80c1cc0ef002431e8932a963b	0xdfd5477e42bd164610599471aa848bc9fac1703c	0xba12222222228d8ba445958a75a0704d566bf2c8	8000000000000	0xb95cac281e19cf2d73a72ef1332c882f20534b6519be0276000200000000000000000112000000000000000000000000dfd5477e42bd164610599471aa848bc9fac1703c000000000000000000000000dfd5477e42bd164610599471aa848bc9fac1703c0000000000000000000000000000000000000000000000000000000000000080000000000000000000000000000000000000000000000000000000000000008000000000000000000000000000000000000000000000000000000000000000e000000…	16112645	0xe99f6e87a99eafd174a39eb092bd1fed13ffb022170209341ac2c8de521f2026
68177	0x98b6db94e8f1c3284f1c5243f3a2b91f73e57cebe861304ff763b4b24c137a40	0x4b15496c7732f1fe23f38198902e9fcd8c82ce8d	0x8086c122102bcb2d0440b11f6d875c17c80ed03c	0	0xac4a91c0000000000000000000000000000000000000000000000000000000000000004000000000000000000000000000000000000000000000000000000000000001400000000000000000000000004b15496c7732f1fe23f38198902e9fcd8c82ce8d00000000000000000000000000000000000000000000000000000000000006130000000000000000000000000000000000000000000000c490dbcca0ee68000000000000000000000000000000000000000000000000000000000000000000c000000…	16112645	0xe99f6e87a99eafd174a39eb092bd1fed13ffb022170209341ac2c8de521f2026
68178	0x16e41be2b93a3d7d91b809538504c7ef1073828ffd708a74d5ecb6414635567f	0x98399791cc72643c6f6e3619d5adff00618813e5	0x45804880de22913dafe09f4980848ece6ecbaf78	0	0xa9059cbb00000000000000000000000052748a2d3500c6c721152f0a714462e93a9bdce8000000000000000000000000000000000000000000000000489486e87192f3c0	16112645	0xe99f6e87a99eafd174a39eb092bd1fed13ffb022170209341ac2c8de521f2026
68179	0xdebc7c978b472c21a6d04097bfe7dc4721c61f1f78265470eef02cbe7ea7be18	0xa95261d06cde28a8e491acaaa7687673bf08ff0b	0x76f4eed9fe41262669d0250b2a97db79712ad855	0	0xf17a454600000000000000000000000000000000000000000000000000000000000000c000000000000000000000000000000000000000000000000000000000000001a00000000000000000000000000000000000000000000000000000000022c348170000000000000000000000000000000000000000000000000000000022a895710000000000000000000000001d64fb0ffa8362b2e1ee7ee03929159551eab26e000000000000000000000000000000000000000000000000000000000000022000000…	16112645	0xe99f6e87a99eafd174a39eb092bd1fed13ffb022170209341ac2c8de521f2026
68180	0xf1bb44c4334b9cf8d12f2286decced3b9dd19969712ad42ee164f45f568f314b	0x430fc223ddab9cddbbe8b882da931b85bb9466b3	0xa0b86991c6218b36c1d19d4a2e9eb0ce3606eb48	0	0xa9059cbb000000000000000000000000cfde2fb605116f23836da32fe243255b8580b0d000000000000000000000000000000000000000000000000000000000017d7840	16112645	0xe99f6e87a99eafd174a39eb092bd1fed13ffb022170209341ac2c8de521f2026
68183	0x4d6c219bd6307b583865a128d8457c855025b962dedca128c30213dba5f4e13c	0x0b7b34d1fb135f1024aa337e786e61e45f518cae	0x7492e30d60d96c58ed0f0dc2fe536098c620c4c0	0	0xefef39a10000000000000000000000000000000000000000000000000000000000000001	16112645	0xe99f6e87a99eafd174a39eb092bd1fed13ffb022170209341ac2c8de521f2026
68184	0xb93d3317569d8c0662517cc66f172a2354953bda1c7c32114c7349b464ed3354	0xaa356ef547d5664c4d25b717760f521917a6936d	0x6bb204870617784397da68e46aefa49ebfda5a85	0	0x98a6e993000000000000000000000000000000000000000000000000000000000000004000000000000000000000000000000000000000000000000000000000000001e0000000000000000000000000aa356ef547d5664c4d25b717760f521917a6936d00000000000000000000000000000000000000000000000000000000000000000000000000000000000000000000000000000000000000000000000000000000000000000000000000000000000000000000000000000000000000000000000000000…	16112645	0xe99f6e87a99eafd174a39eb092bd1fed13ffb022170209341ac2c8de521f2026
68186	0x342a7036af749c919de58aaa1598adbf24db7f88d1dfc41f65e3e586cffcb982	0x94ed67ba714f66fca7ce230fd63ee9d4a4fb6325	0xa0b86991c6218b36c1d19d4a2e9eb0ce3606eb48	0	0x095ea7b300000000000000000000000052de8d3febd3a06d3c627f59d56e6892b80dcf12000000000000000000000000000000000000000000000000000000013a0abeb0	16112645	0xe99f6e87a99eafd174a39eb092bd1fed13ffb022170209341ac2c8de521f2026
68189	0x84c56895712c1580b2970dd162f6e713a8df8b7889e2bff13ff64d8bcf9e6315	0xbed8e3418760692916f58ebe336b0d85ecf764be	0x7492e30d60d96c58ed0f0dc2fe536098c620c4c0	0	0xefef39a10000000000000000000000000000000000000000000000000000000000000001	16112645	0xe99f6e87a99eafd174a39eb092bd1fed13ffb022170209341ac2c8de521f2026
68190	0xc80be68a9687219d3ec6f6ca09731b903c03abcd44b850a39c52cb0815c085bf	0x56eddb7aa87536c09ccc2793473599fd21a8b17f	0x021af77cdd276ff8f6134b4c5cc7d79a69714043	1.13e+18	0x	16112645	0xe99f6e87a99eafd174a39eb092bd1fed13ffb022170209341ac2c8de521f2026
68195	0x1b3ada2dbf664eae03417704094779a8d506271dc03887e6196e0f160c28a485	0xc89624078e4348b5ad5c117cedc8ea2fe78b4816	0xdac17f958d2ee523a2206206994597c13d831ec7	0	0xa9059cbb0000000000000000000000003c12e8c729f01ef502da2e884f85abcc2d7572b1000000000000000000000000000000000000000000000000000000000d18a940	16112645	0xe99f6e87a99eafd174a39eb092bd1fed13ffb022170209341ac2c8de521f2026
68197	0xae4fe5054247fd17cbeb0c8ae84ba35443c0e41255c3bbe635fe7160095c7e04	0x463d200acb7e92af8e891be3c338157225232528	0x00000000006c3852cbef3e08e8df289169ede581	2.35e+17	0xfb0f3ee100000000000000000000000000000000000000000000000000000000000000200000000000000000000000000000000000000000000000000000000000000000000000000000000000000000000000000000000000000000000000000000000000000000000000000000000000000000000000000000000002ef662121fec0000000000000000000000000001df24622941c97840ba53e2b165d4bcd0d86464a000000000000000000000000004c00500000ad104d7dbd00e3ae0a5c00560c0000000…	16112645	0xe99f6e87a99eafd174a39eb092bd1fed13ffb022170209341ac2c8de521f2026
68199	0xf7c18e23d1a249666daa07c758b2580d12be095deae9dbe8531af5f79b7a3174	0xfd7f0cf89827593a47c1738638bef98dfca24391	0xf041c6b49e7ebd99516a25359b978ef2ee75810f	0	0x095ea7b30000000000000000000000007a250d5630b4cf539739df2c5dacb4c659f2488dffffffffffffffffffffffffffffffffffffffffffffffffffffffffffffffff	16112645	0xe99f6e87a99eafd174a39eb092bd1fed13ffb022170209341ac2c8de521f2026
68200	0x2aa563bd6236c5be2c1df7dadc762d9ba89b4725290110589d71cede4cf17893	0x5a8216a9c47ee2e8df1c874252fdee467215c25b	0x5667ee03110045510897ada33dc561cefcbcc904	0	0xc9807539000000000000000000000000000000000000000000000000000000000000008000000000000000000000000000000000000000000000000000000000000003200000000000000000000000000000000000000000000000000000000000000400000100000100000000000000000000000000000000000000000000000000000000000000000000000000000000000000000000000000000000000000000002800000000000000000000000b4bad2bda0590cb431e62bdc293fd71a000168570308030…	16112645	0xe99f6e87a99eafd174a39eb092bd1fed13ffb022170209341ac2c8de521f2026
68201	0xeea6a9bc1f08be111d9c73f7e06ddc9478eb49a7435731c03764ed4ead6d9f4a	0xf56c7ce8914b22c6d2fc90655631bb963c3afa7b	0x7492e30d60d96c58ed0f0dc2fe536098c620c4c0	0	0xefef39a10000000000000000000000000000000000000000000000000000000000000001	16112645	0xe99f6e87a99eafd174a39eb092bd1fed13ffb022170209341ac2c8de521f2026
68202	0xdf79ef0fbed974b95ae0dde9011baaf673a89047551d7b71fd4681b66294ffe4	0x51fcd8a86020ff601184ec3106af6ed222688272	0x80c67432656d59144ceff962e8faf8926599bcf8	9260000000000000	0x	16112645	0xe99f6e87a99eafd174a39eb092bd1fed13ffb022170209341ac2c8de521f2026
68204	0x25e357212f3221c375923a11c3af22c54114898d4054c58a7e8cf68f52af0701	0x4976a4a02f38326660d17bf34b431dc6e2eb2327	0x8ef9fd761cef54b586167ca1b0f3207e5701f80a	4.48e+16	0x	16112645	0xe99f6e87a99eafd174a39eb092bd1fed13ffb022170209341ac2c8de521f2026
68206	0x88d8da382c042bc402f8a019fd556dac74e8d9539932568e049246079990386e	0xd25ad19dfdb6a05cdfc7b8c85194b2d97f54ae77	0x7492e30d60d96c58ed0f0dc2fe536098c620c4c0	0	0xefef39a10000000000000000000000000000000000000000000000000000000000000001	16112645	0xe99f6e87a99eafd174a39eb092bd1fed13ffb022170209341ac2c8de521f2026
68208	0x4deaaf3c26b98274aa99a8896a724d02b3c3827ebc6e75236abbfd2854592263	0xd24400ae8bfebb18ca49be86258a3c749cf46853	0x5f65f7b609678448494de4c87521cdf6cef1e932	0	0x96aa736800000000000000000000000000000000000000000000000000000000000000200000000000000000000000000000000000000000000000000000000000000001000000000000000000000000c7a2432615556cd8534ac881145e451d0fc08870	16112645	0xe99f6e87a99eafd174a39eb092bd1fed13ffb022170209341ac2c8de521f2026
68209	0xc1f95cf04e8467b5f2cf24f7fb2df1104bb5251d290ba4db7531e8b96ce1cf3f	0x39ef1da92277310427cebeeb8e9db3cb5dee0021	0xeeeec6476073778077b40a73fe32e23a9876cab4	7.91e+16	0x2b66d72e000000000000000000000000000000000000000000000000000000000000002000000000000000000000000000000000000000000000000000000000000000ee65794a68624763694f694a46557a49314e694973496d74705a434936496a64684e6a526c5a6d51314c544a694e4463744e475a6a5a6931684f4463784c5445785a6d59354f5451345954646a4f434a392e436763784d6a597a4c6a513345674e56553051614a445a6c5a4745314d6a4d324c5442694e7a59744e475a6d4f5330344f4…	16112645	0xe99f6e87a99eafd174a39eb092bd1fed13ffb022170209341ac2c8de521f2026
68210	0xa6a7e421cba8d1a443c05baab65638378c889410e3884767762cf1b5c7387a15	0x747dbfbcfb74fd5fc115896c758a2fdff581c702	0x283af0b28c62c092c9727f1ee09c02ca627eb7f5	0	0xf14fcbc87703a84120d7b431511c52dbdfdd598f5682bbf8764ba6bb87d734dad69501ac	16112645	0xe99f6e87a99eafd174a39eb092bd1fed13ffb022170209341ac2c8de521f2026
68212	0x344c2b3e51fe34a38cb35dd7bebe394239c71919754655b856197999e3d7c8f0	0x991f4e3aade8cebdea6dd979ffe0f964c3806a0f	0xed1cc2b53ae4756664cc8763fa62e63e96ceb4e7	5040000000000000	0x	16112645	0xe99f6e87a99eafd174a39eb092bd1fed13ffb022170209341ac2c8de521f2026
68213	0x9fed572a6fc9c6494d8527a59628101388d5efa8c278fb9e0a2deeb48235842e	0x4abf57ac7c124ccd94d9b90e8ba47c18c444204a	0x8f41fc6daed55b1955dbb72099ac26d295e34f75	0	0xa22cb4650000000000000000000000001e0049783f008a0085193e00003d00cd54003c710000000000000000000000000000000000000000000000000000000000000001	16112645	0xe99f6e87a99eafd174a39eb092bd1fed13ffb022170209341ac2c8de521f2026
68214	0x69c01f2c433afd3043d3ce7bf61446e10bd8bb216b907a0cebeca7665131ab79	0xa83501fd9bbae8bec15812e443345e14e6e3868d	0x777efadaf0c3052c93727df1070ff4ad89297897	1.5e+17	0x	16112645	0xe99f6e87a99eafd174a39eb092bd1fed13ffb022170209341ac2c8de521f2026
68216	0x5a7f879bcb52daef805f23ce92827936c931ab4ceaa0e19c8409a779d097204e	0x5a643f4cb6380a5cedfbb6706cca74e20245fb00	0x7492e30d60d96c58ed0f0dc2fe536098c620c4c0	0	0xefef39a10000000000000000000000000000000000000000000000000000000000000001	16112645	0xe99f6e87a99eafd174a39eb092bd1fed13ffb022170209341ac2c8de521f2026
68217	0x23e0322055753ea354a3ebe166988bd7c98fa64bb67a4e95e58860fa7c6f3a72	0x46340b20830761efd32832a74d7169b29feb9758	0xcfed6f070bbe97ce318f154c34172475c9190d50	1.89e+17	0x	16112645	0xe99f6e87a99eafd174a39eb092bd1fed13ffb022170209341ac2c8de521f2026
68218	0xb9e17ee392aee5ae46ebddacf7ec063cd765c7a6fbbfe0152e32c7929c01786c	0x3db49027722024b59a1607a7254c1aee5fd671c9	0x7492e30d60d96c58ed0f0dc2fe536098c620c4c0	0	0xefef39a10000000000000000000000000000000000000000000000000000000000000001	16112645	0xe99f6e87a99eafd174a39eb092bd1fed13ffb022170209341ac2c8de521f2026
68219	0xe5838e051c5fa1073a95c4f2c9bd941fdd39d83081631fe41a2b17e7b29d17ca	0x9696f59e4d72e237be84ffd425dcad154bf96976	0xdac17f958d2ee523a2206206994597c13d831ec7	0	0xa9059cbb0000000000000000000000007e1db8f20477c191f4553e8fc6bef715b13ce2a70000000000000000000000000000000000000000000000000000000012e1fc00	16112645	0xe99f6e87a99eafd174a39eb092bd1fed13ffb022170209341ac2c8de521f2026
68222	0x4bfdc77d03ab99ab47b71859a1f643b1bdc145d22f7f98691fd41f314377b3c4	0xcc97dc4b6488ca9731c98e1bd5656599b08bac91	0x99a9b7c1116f9ceeb1652de04d5969cce509b069	0	0xa22cb4650000000000000000000000001e0049783f008a0085193e00003d00cd54003c710000000000000000000000000000000000000000000000000000000000000000	16112645	0xe99f6e87a99eafd174a39eb092bd1fed13ffb022170209341ac2c8de521f2026
68223	0x06178956a31cd98c4fee67ec27ce9a69496191ec3e1590fe0c33bf28f496396d	0x008c4bb1c24d3c6e50f32b6d66e8b6065b3d68d1	0xdac17f958d2ee523a2206206994597c13d831ec7	0	0x23b872dd000000000000000000000000a77ec99eb551341c5995273923c1320af551980a00000000000000000000000021ab83cb462ecbefb29fed362b7d531bf27302fe000000000000000000000000000000000000000000000000000000018c12a740	16112645	0xe99f6e87a99eafd174a39eb092bd1fed13ffb022170209341ac2c8de521f2026
68224	0x5cdae2d72d3c212f9f00b14faf6234e035d1b5df5fa21b594ca6ccc589dd79fc	0x58e5bf4ab9bc4d8f4032cf03a32d87528c4e182c	0x6e48cb19c7a24b2fbe4d151edc47c26b9c5928d6	4000000000000000	0x	16112645	0xe99f6e87a99eafd174a39eb092bd1fed13ffb022170209341ac2c8de521f2026
68225	0xdc1194ff98c79aced35b2e1f4f9b66d3ea03b6d75d1e78ae661de9bcce3551f5	0x2017afe23eb6766988e2546fe88ee4ee16b781f6	0xbde26717c6d0445a13b9e0488a766935c3f8e23d	0	0xf98d63ec000000000000000000000000000000000000000000000000000000000000004000000000000000000000000000000000000000000000000000000000000006a00000000000000000000000000000000000000000000000000000000000000032000000000000000000000000d2176211c7fda7bd3a87c550be2cf5b0bdb2839f000000000000000000000000d20d8231a323a7359a61fc0a2018f32dda29eeaa000000000000000000000000d205b227bafc769c218af1e5850124f91d2a6ba300000…	16112645	0xe99f6e87a99eafd174a39eb092bd1fed13ffb022170209341ac2c8de521f2026
68226	0x2ced317daad910c870eaeaf3e5b7fde7c795c6332c6ece3f3af46d8f03d9157f	0x635016856e51e8cfaa94dcfb257055fc1f6310c3	0xa0b86991c6218b36c1d19d4a2e9eb0ce3606eb48	0	0xa9059cbb000000000000000000000000fb532eedf35cd513f6236b42691da71f67f3704f0000000000000000000000000000000000000000000000000000000005f5e100	16112645	0xe99f6e87a99eafd174a39eb092bd1fed13ffb022170209341ac2c8de521f2026
68228	0xdfd44570ba75f0dfb8708e0cb4f15187bbf17bc8d675f6b8cefafcd512f720ec	0x3e8af32e0ba5d48dadf051ecb54e0f12a288538b	0x00000000006c3852cbef3e08e8df289169ede581	2000000000000000	0xfb0f3ee10000000000000000000000000000000000000000000000000000000000000020000000000000000000000000000000000000000000000000000000000000000000000000000000000000000000000000000000000000000000000000000000000000000000000000000000000000000000000000000000000006ed83c14fe000000000000000000000000000d89a51ae9ae2832704037d938ef13c246df2cd70000000000000000000000000004c00500000ad104d7dbd00e3ae0a5c00560c0000000…	16112645	0xe99f6e87a99eafd174a39eb092bd1fed13ffb022170209341ac2c8de521f2026
68229	0x91ef0d0367646a37bdec717b860aa884306949b209d02a81ef7a1221240a26f0	0x9fff3be9e370545688a283babc09992216cd616f	0x5f5c86a9f8aaf63ce27b82fab3b33df73cbc3d12	0	0x095ea7b300000000000000000000000068b3465833fb72a70ecdf485e0e4c7bd8665fc45ffffffffffffffffffffffffffffffffffffffffffffffffffffffffffffffff	16112645	0xe99f6e87a99eafd174a39eb092bd1fed13ffb022170209341ac2c8de521f2026
68230	0x92c8db75dae2921cb999dd5cfac377706e4e45e90aea06bf508d84d8e8e42c45	0xd1f6a55632ff7a0cc635cd649e62e355f8e17fc8	0x7492e30d60d96c58ed0f0dc2fe536098c620c4c0	0	0xefef39a10000000000000000000000000000000000000000000000000000000000000001	16112645	0xe99f6e87a99eafd174a39eb092bd1fed13ffb022170209341ac2c8de521f2026
68233	0x0e52b136f1d8037b30ef8bccb56f727724756e085d16746f73866189eff4dab0	0x22a65510075e826e682d47b60abed8d2709e79ce	0x0f5d2fb29fb7d3cfee444a200298f468908cc942	0	0xa9059cbb00000000000000000000000011b0d19de662cc6b40ed20ccdd849e5ab791ed0600000000000000000000000000000000000000000000000cfa85d7091a988000	16112645	0xe99f6e87a99eafd174a39eb092bd1fed13ffb022170209341ac2c8de521f2026
68234	0x95fe5b8c8547de7b0c311596fbf16a05cb331c4500e99e030ca3e52ff0376872	0x11cc1de132a111ee430ed55c1c56673366428d57	0x06450dee7fd2fb8e39061434babcfc05599a6fb8	0	0x9ff054df00000000000000000000000000000000000000000000000000000000000001af	16112645	0xe99f6e87a99eafd174a39eb092bd1fed13ffb022170209341ac2c8de521f2026
68235	0x9e0b32fcf7b42570da03d9bd0f6ac38cd86db306c361e3fd0993ddefb4a6166e	0x972ed166d3987a43077ee7e91fff19ab47b46189	0x7492e30d60d96c58ed0f0dc2fe536098c620c4c0	0	0xefef39a10000000000000000000000000000000000000000000000000000000000000001	16112645	0xe99f6e87a99eafd174a39eb092bd1fed13ffb022170209341ac2c8de521f2026
68236	0xf6adcef73ecac4358fb053518655ce54594511e8fc07f6302ac99e2478e32ee4	0x5d0f37d44969ac70932d16e5ba5efe7340730d4c	0x881d40237659c251811cec9c364ef91dc08d300c	0	0x5f5755290000000000000000000000000000000000000000000000000000000000000080000000000000000000000000a0b86991c6218b36c1d19d4a2e9eb0ce3606eb4800000000000000000000000000000000000000000000000000000000055d4a8000000000000000000000000000000000000000000000000000000000000000c000000000000000000000000000000000000000000000000000000000000000136f6e65496e6368563446656544796e616d69630000000000000000000000000000000…	16112645	0xe99f6e87a99eafd174a39eb092bd1fed13ffb022170209341ac2c8de521f2026
[truncated: 19,863 more rows]
