# Supplementary material for: Detection of malicious nodes based on consortium blockchain
Source: PeerJ Comput Sci. 2024 Jun 12;10:e2108. doi: 10.7717/peerj-cs.2108 (PMC11232615; doi:10.7717/peerj-cs.2108)
Supplement: Supplemental Information 5 — The est and lable in the table represent the labelled values of the nodes, where 0 indicates a normal node and 1 indicates a malicious node [file peerj-cs-10-2108-s005.xlsx]

## Sheet: Sheet1
address	interval	delay	est	lable
0x0973ff3cbf6b229380f702f7e2af44d377e6be96	3	-28	0	0
0x0998eeec2a32c6160c962a9338627263a6f35341	9	-4	0	0
0x09a0da7289a60809992d819530833f4053124090	3	-150	0	0
0x09aa7bd101451c9e1d99764dbb4846cb08cdbc02	22	-89.5	0	0
0x09d486ed40727a45fd394d2e658d88a0990b2455	4	-2	0	0
0x0a0fc35cc2c544de676bb543269c1eca3d841f5e	0	-49	0	0
0x0a2fbc9aa7f683ac59e15a80367f0893203cb2b4	5	-0.5	0	0
0x0a4e1a270c7aaad91afbbf55fdc0e32c4771a98d	6	-2	0	0
0x0a4ff45da57390fb3a98f06a18dfd767898b9e1f	7	-6	0	0
0x0ef22f9a5bd6e89554365b337c1c263d5e15920e	0	-39	0	0
0x0f1366a597fa7ec9b6425fe716a63aaaf3eb60a1	2	-1	0	0
0x0f3667a010252ea3ef043e9c63fe23d6d557d4a8	3	-5	0	0
0x0f4485c59b093c51f510372e5b025cd4f5850cd0	0	-61	0	0
0x0f4508f003afc5cbf10f5733e6401d9eec5c2b9b	11	-82	0	0
0x0f493931981ef166bc2faf0de4324f8a26bad0c2	10	-51	0	0
0x119f4cec95755de150f68ed65ce7ac19c11ddb8f	22	-21	0	0
0x11be5e7b6d31266390b8f38de7c53ece720a7b9b	18	-16	0	0
0x11c03b0e147af0e527a7f8bdfec94987fc5c579d	2	-5	0	0
0x11d868c559a86b27e5f6b2b6cf55611244e09c2b	6	-14	0	0
0x11f6f8de871c43eccff42adc95c236859abc95bc	2	-15	0	0
0x11fa40eeb7df940f2c1fa95495761f5325bf0f89	19	-1	0	0
0x120051a72966950b8ce12eb5496b5d1eeec1541b	5	-12	0	0
0x1215fa086be068d1b20184c971e7e3d351319fb9	2	-1	0	0
0x12178fc891c0d2dec42bfd4b2975646a054d1c67	4	-3	0	0
0x1225efb6e71e8664ae1817c599a5ff5937c293a6	3	-2	0	0
0x123b5c9b3b55b14b660ff3fe69868eefd1f38698	2	-74	0	0
0x12561cc3ea2a60aa158b0421010859a983bf3c96	0	-6	0	0
0x125c459df3e8454b3c90462f5078c34182bd1312	2	-4	0	0
0x09564716e12eb2ca51f64d07d76aa88b7cdc0283	17	3.66667	0	0
0x096616d1130302f261c2ae7627494aefc5173fc6	7	3	0	0
0x09b3492c9121ee69e3b807f63186d63b3d2ac568	23	2	0	0
0x0a00175601827bf8094885310338b5186e1bdff8	9	0.25	0	0
0x0ea67df8006be15ac59b5bca21ae206eb925fc6c	9	2.5	0	0
0x0ee9e940fe60307c6ffc34c6534927aa2972b666	13	3.33333	0	0
0x0ef802bac0519a7765be9ec183fa8f46fbbb0927	19	17	0	0
0x0f3790904346b9174032af8e41d4df5f9dd07113	9	0	0	0
0x0f5073ce2542ec0cc99ba0aa3598d60bd9924ce3	7	3	0	0
0x0f6b56b9798f55b43fabd7c800d883211f23594d	9	2	0	0
0x0f784e3429b5f9cf718e4e61d2f3f1eeaa1740c2	22	8	0	0
0x119544da379e6b05c5edb7c7eb9d806f2dba1f8b	5	1	0	0
0x11ac578eae53003d2362438a224ef33ca179629f	3	1	0	0
0x11b7e01c575e0be5334b2aa491c5600fc8e2da50	5	0	0	0
0x12137de8429bbff2bd583d0c8ea05b0735d23796	8	3	0	0
0x125cb902d81c4912cf12fa2fdd520ae5119cb944	2	0	0	0
0x126accde9fa7cdc6cc8dcaae1f5071baae8a732a	11	6	0	0
0x128373c10b7c8637aed17a86071405ac101e5869	18	13	0	0
0x12b8e391d9afe5a7b8a2aedeaf2306e4ad1c177f	15	12	0	0
0x12b99008b16d25b8f5872ecf71979bbc072dfe04	6	0	0	0
0x12ba001ce4240432e2c076a8f925d156fc48cb4c	23	2.66667	0	0
0xdcd2726e776ff732ee4c08c3d30f1f96eb95d9b7	335	163.5	0	1
0xdcdb84e268710d6977cdf559aa77e7aecfc4dab1	318	152.5	0	0
0xdcdf0feeede933ceafc6131b663f1ee210ac61ae	268	168.334	0	0
0xdcf41fc1fd3c6e013d09914ef87fd36add09c727	128	120	0	0
0xdcff76ec0615ca94cfe5d8f2cda6377521436ac6	295	138.5	0	0
0xdd0190fbf9891e43494d15d0194790cf4d15a6a5	316	142.5	0	0
0x01f37a1049683a1bf11c57479adecc0b23a23581	224	103	0	0
0x020f4fef57d426ad56a59e33d0cdffeb92860fb3	318	65.5	0	0
0x021d76dc64777ae1f88bec24569d028c0751dce9	289	86.5	0	0
0x072187c5685fdfac029394eff1b37b87c01f5518	178	91	0	0
0x0737ec6b2c85746363f3b8cb27a3fbf6fef802ef	344	45.1429	0	0
0x075ad1c6e2e100b864c873868a6b5ccc4f93dc63	287	52.4	0	0
0x0987bbc966b754d4c6179b44516deff8b357f7fd	25	5	0	0
0x098d8510da178820cdc40f7ce3ee8804f34005a8	126	119	0	0
0x09c058e919b8923a24a4677a1ef267e5d8e4084e	27	4.5	0	0
0x09ed7bb742fbf602ce9dcf43b8d0374a6ca91aea	24	4	0	0
0x0a15c29689abebd91aac50612dce550bd6fd3a33	232	83	0	0
0x0a4244c70bf10f1ffddaa52dd90941a3c11daf0d	161	36.6667	0	0
0x0ec6d16f8246d047a5a0872080432a8138f46baa	55	46	0	0
0x0f1db94c72927f2b4398ac1893182263c18a043d	112	7.66667	0	0
0x0f1dfe301ba00fd36aa9aec7388259af9ecb210f	29	25	0	0
0x0f451011f5cb38dd579f0dee58789a65ac4c61d5	25	10.5	0	0
0x0f7a4e09464e2e28dee265a4a2f8b729ad6d8e51	74	27	0	0
0x0f7ad6550c409dfcad8e7b14edb96266730cc1e0	126	119	0	0
0x0f868f27cc37c7e80512c8c0c03a409b22c839e1	157	147	0	0
0x1185be8da26b2ae0a6950f9587589536f9dda9e8	196	80	0	0
0x11c9a9a80a82b4b66fb71a8e13b28f9d7a32a245	27	2.55	0	0
0x120f6ebde2b8582c569903ac76a8f150bbd0a6bd	52	4.66667	0	0
0x121ef52def328ec4f82410aced31f8e8f1bfa4c9	51	28	0	0
0x123610428119610f74aaaab8b76ff79b3a32a0c1	43	41	0	0
0x129c24df1bd82bc2ce9f461063af011662926ba5	77	75	0	0
0x12aaf9107b4e96f972fc920bf3bd0e651fc8bcd5	35	33.25	0	0
0xdcf37d8aa17142f053aaa7dc56025ab00d897a19	438	-122	0	1
