# Supplementary material for: Detection of malicious nodes based on consortium blockchain
Source: PeerJ Comput Sci. 2024 Jun 12;10:e2108. doi: 10.7717/peerj-cs.2108 (PMC11232615; doi:10.7717/peerj-cs.2108)
Supplement: Supplemental Information 6 — In the table est and lable are the labelled values of the nodes, where the labelled value of the simulated malicious node is 1 and the value of the detected malicious node is -1. [file peerj-cs-10-2108-s006.xlsx]

## Sheet: Sheet1
address	interval	delay	est	lable
0x01c48f1fa4061301aa19b7f09b9f6a8756bf49d9	4	-383	-1	1
0x01eb62ff431b4782e34b76cc801d4c385c4049ee	445	109.25	-1	1
0x021d9be5e82353a2b609b0842e5e58ee2af05f32	416	397	-1	1
0x06e14b037650e6d7c5e6a8eb329e1b44e2d7650c	632	79	-1	1
0x0711cddb105819b14d55439581fe092aa5b39461	459	26	-1	1
0xdd05669c524b2633d76b446fb54aa756212563d8	177	-184	-1	1
0xdd2bc15318d884094e9b3b29733bff42c964b577	378	-49.6364	-1	1
0xdd498f56dde61e47e69ee9b2561b462baf48d9b9	157	-123	-1	1
0x01de494230b03989f9a2d8956fdfe5486d712ebf	121	-98.5	-1	1
0x01f0831120ab81f91109e099afb551a091c4c05a	82	-157	-1	1
0x020717ec52380aa0549cf7bf9f5976274371a58a	89	-136.75	-1	1
0x0215e80a798723dba358205a0765732643c7d34a	59	-166.5	-1	1
0x06f8d80e285d00b7c65db2a999a290d9636e9c6f	98	-164.4	-1	1
0x0710ee20cb035b50f6aedf58bf37b8dbd842f1ed	120	-200	-1	1
0x0717ba2152b8b4763e3ea1fdea7eebf16c54070b	429	-300	-1	1
0x074dccdb202ac9fe0f4b25bdaa33762287579ea2	288	-14.4286	-1	1
0x0758e77def8db3e078dd579a2e686a4543e5d6eb	179	-100.25	-1	1
0x0971fcb069ecde4eb4a43325e46041aab73f5732	202	-53.3333	-1	1
